# Supplementary material for: Identification of Yellow Pigmentation Genes in Brassica rapa ssp. pekinensis Using Br300 Microarray
Source: Int J Genomics. 2014 Dec 31;2014:204969. doi: 10.1155/2014/204969 (PMC4297637; doi:10.1155/2014/204969)
Supplement: Supplementary file 1 — In this study, we used Br300K B. rapa microarray and identified three genes as functionally novel genes that involved in yellow color pigmentation. Supplementary figures (Figure S1 to S3) explains the information about plant materials and correlation coefficient of two experimental results. The three identified transcription factor genes are specifically expressed and confirmed their relatedness in yellow pigmentation. Table S1 to S9 supports our results and provides detailed annotation information of some differentially expressed genes. [file 204969.f1.zip › mat.204969.v2/Table S2.xls]

## Sheet: Table
Table S2. Microarray data expressed as PI (probe intensity) values. PI values were expressed by mean value of two replicated experiments.
B. rapa SEQ_ID	A. thaliana locus	A_thaliana_homologue_Description	PI values
			White leaves	Yellow leaves
Brapa_ESTC000001	AT5G57370	Symbols: | similar to U2 snRNP auxiliary factor large subunit, putative [Arabidopsis thaliana] (TAIR:AT1G60900.1); similar to conserved hypothetical protein [Medicago truncatula] (GB:ABE84015.1) | chr5:23262037-23262696 FORWARD	8551.49	5620.68
Brapa_ESTC000002	AT3G60750	Symbols: | transketolase, putative | chr3:22464979-22467799 FORWARD	9403.64	13910.9
Brapa_ESTC000003	AT2G19180	Symbols: | similar to unknown protein [Arabidopsis thaliana] (TAIR:AT1G78890.1); similar to At1g16840/F17F16.27-related [Medicago truncatula] (GB:ABE84583.1) | chr2:8331824-8332657 FORWARD	9407.15	5687.55
Brapa_ESTC000004	AT1G09815	Symbols: | DNA polymerase delta subunit 4 family | chr1:3189462-3190052 FORWARD	536.852	169.919
Brapa_ESTC000005	AT1G52040	Symbols: ATMBP, MBP1 | MBP1 (MYROSINASE-BINDING PROTEIN 1) | chr1:19354264-19356247 REVERSE	9266.64	11155.3
Brapa_ESTC000006	AT4G16720	Symbols: | 60S ribosomal protein L15 (RPL15A) | chr4:9400178-9401337 REVERSE	27768	26313.6
Brapa_ESTC000007	AT2G18370	Symbols: | protease inhibitor/seed storage/lipid transfer protein (LTP) family protein | chr2:7987769-7988557 FORWARD	27.5765	47.6221
Brapa_ESTC000008	AT2G22475	Symbols: | GRAM domain-containing protein / ABA-responsive protein-related | chr2:9548603-9551858 FORWARD	10040.2	10106.8
Brapa_ESTC000009	AT1G08920	Symbols: | sugar transporter, putative | chr1:2867449-2870363 FORWARD	328.262	612.275
Brapa_ESTC000010	AT2G29340	Symbols: | short-chain dehydrogenase/reductase (SDR) family protein | chr2:12604208-12606086 FORWARD	2511.27	7795.33
Brapa_ESTC000011	AT2G30740	Symbols: | serine/threonine protein kinase, putative | chr2:13103476-13105362 FORWARD	3425.84	3482.46
Brapa_ESTC000012	AT1G44960	Symbols: | similar to unknown protein [Arabidopsis thaliana] (TAIR:AT1G03260.1); similar to expressed protein [Oryza sativa (japonica cultivar-group)] (GB:ABA94087.1); contains domain UNCHARACTERIZED (PTHR12677) | chr1:17002016-17003887 FORWARD	2104.33	701.112
Brapa_ESTC000013	AT3G18410	Symbols: | NADH-ubiquinone oxidoreductase-related | chr3:6323209-6323767 FORWARD	6240.58	6019.04
Brapa_ESTC000014	AT4G10100	| Symbols: CNX7, SIR5 | CNX7/SIR5 | chr4:6309087-6309377 FORWARD	1462.19	3864.24
Brapa_ESTC000015	AT4G13940	Symbols: EMB1395, MEE58, SAHH, SAHH1, HOG1 | HOG1 (HOMOLOGY-DEPENDENT GENE SILENCING 1); adenosylhomocysteinase | chr4:8054926-8056671 FORWARD	12907.9	4422.45
Brapa_ESTC000016	AT4G24400	Symbols: SnRK3.13, PKS11, CIPK8 | CIPK8 (CBL-INTERACTING PROTEIN KINASE 8); kinase | chr4:12617389-12620491 FORWARD	4022.55	6278.31
Brapa_ESTC000017	AT3G62420	Symbols: ATBZIP53 | ATBZIP53 (BASIC REGION/LEUCINE ZIPPER MOTIF 53); DNA binding / sequence-specific DNA binding / transcription factor | chr3:23102820-23103260 REVERSE	24186.8	26732.7
Brapa_ESTC000018	AT1G20620	Symbols: SEN2, CAT3 | CAT3 (CATALASE 3); catalase | chr1:7143132-7146183 FORWARD	28220.2	18777.3
Brapa_ESTC000019	AT5G18190	Symbols: | protein kinase family protein | chr5:6010217-6013726 REVERSE	334.027	195.891
Brapa_ESTC000020	AT1G69620	Symbols: RPL34 | RPL34 (RIBOSOMAL PROTEIN L34); structural constituent of ribosome | chr1:26193563-26194744 FORWARD	45418.7	39714.7
Brapa_ESTC000021	AT1G13130	Symbols: | glycosyl hydrolase family 5 protein / cellulase family protein | chr1:4474724-4477818 FORWARD	6385.53	8708.09
Brapa_ESTC000022	AT1G11650	Symbols: ATRBP45B | ATRBP45B; RNA binding | chr1:3914895-3917301 FORWARD	6480.88	2692.97
Brapa_ESTC000023	AT3G47990	Symbols: | zinc finger (C3HC4-type RING finger) family protein | chr3:17724352-17727036 REVERSE	2585.12	1375.48
Brapa_ESTC000024	AT1G68560	Symbols: ATXYL1, XYL1 | ATXYL1/XYL1 (ALPHA-XYLOSIDASE 1); alpha-N-arabinofuranosidase/ hydrolase, hydrolyzing O-glycosyl compounds / xylan 1,4-beta-xylosidase | chr1:25738098-25741560 REVERSE	849.321	1363.64
Brapa_ESTC000025	AT1G47960	Symbols: ATC/VIF1, C/VIF1 | C/VIF1 (CELL WALL / VACUOLAR INHIBITOR OF FRUCTOSIDASE 1); pectinesterase inhibitor | chr1:17685623-17687185 REVERSE	7214.85	11335.1
Brapa_ESTC000026	AT2G30440	Symbols: | chloroplast thylakoidal processing peptidase | chr2:12980321-12982104 FORWARD	4473.27	1692.27
Brapa_ESTC000027	AT1G20910	Symbols: | ARID/BRIGHT DNA-binding domain-containing protein | chr1:7277198-7280624 REVERSE	2847.27	3913.82
Brapa_ESTC000028	AT3G60245	Symbols: | 60S ribosomal protein L37a (RPL37aC) | chr3:22279778-22280725 FORWARD	43373.7	39420.7
Brapa_ESTC000029	AT5G55140	Symbols: | ribosomal protein L30 family protein | chr5:22398596-22399013 FORWARD	2768.01	667.735
Brapa_ESTC000030	AT3G04400	Symbols: EMB2171 | EMB2171 (EMBRYO DEFECTIVE 2171); structural constituent of ribosome | chr3:1167345-1168314 FORWARD	33098.7	38993.2
Brapa_ESTC000031	AT1G09590	Symbols: | 60S ribosomal protein L21 (RPL21A) | chr1:3106551-3107608 FORWARD	18516.2	24630.4
Brapa_ESTC000032	AT4G16190	Symbols: | cysteine proteinase, putative | chr4:9171527-9172892 FORWARD	8253.03	8132.44
Brapa_ESTC000033	AT4G35830	Symbols: | aconitate hydratase, cytoplasmic / citrate hydro-lyase / aconitase (ACO) | chr4:16973011-16977953 REVERSE	14064.6	7498.15
Brapa_ESTC000034	AT5G39600	Symbols: | similar to hypothetical protein [Prunus persica] (GB:AAO14625.1) | chr5:15871416-15871999 REVERSE	131.028	196.839
Brapa_ESTC000035	AT5G39950	Symbols: ATH2, ATTRXH2, TRXH2, ATTRX2 | ATTRX2 (Arabidopsis thioredoxin h2, thioredoxin H-type 1); thiol-disulfide exchange intermediate | chr5:16008113-16009109 REVERSE	19962.9	23052.4
Brapa_ESTC000036	AT1G62020	Symbols: | coatomer protein complex, subunit alpha, putative | chr1:22923479-22927393 FORWARD	2128.68	1293.26
Brapa_ESTC000037	AT2G28900	Symbols: ATOEP16-L, ATOEP16-1, OEP16 | OEP16 (OUTER ENVELOPE PROTEIN 16); protein translocase | chr2:12421500-12422536 REVERSE	22666.7	27968.7
Brapa_ESTC000038	AT4G39920	Symbols: TFC C, POR | POR (PORCINO) | chr4:18515876-18516913 FORWARD	5571.08	3767.5
Brapa_ESTC000039	AT5G56350	Symbols: | pyruvate kinase, putative | chr5:22837480-22839755 REVERSE	1129.39	285.03
Brapa_ESTC000040	AT3G02360	Symbols: | 6-phosphogluconate dehydrogenase family protein | chr3:482505-483965 FORWARD	14339.5	5789.34
Brapa_ESTC000041	AT1G22410	Symbols: | 2-dehydro-3-deoxyphosphoheptonate aldolase, putative / 3-deoxy-D-arabino-heptulosonate 7-phosphate synthase, putative / DAHP synthetase, putative | chr1:7912109-7914731 FORWARD	1252.85	669.607
Brapa_ESTC000042	AT1G64370	Symbols: | similar to hypothetical protein FG03565.1 [Gibberella zeae PH-1] (GB:XP_383741.1) | chr1:23892630-23893166 FORWARD	21116.4	11990.3
Brapa_ESTC000043	AT4G15210	Symbols: BMY1, AT-BETA-AMY, RAM1, ATBETA-AMY | ATBETA-AMY (BETA-AMYLASE); beta-amylase | chr4:8666734-8669357 REVERSE	208.807	106.063
Brapa_ESTC000044	AT2G47610	Symbols: | 60S ribosomal protein L7A (RPL7aA) | chr2:19536924-19538471 FORWARD	24174.1	22887.4
Brapa_ESTC000045	AT2G37190	Symbols: | 60S ribosomal protein L12 (RPL12A) | chr2:15626638-15627138 REVERSE	15763.8	15399
Brapa_ESTC000046	AT4G35750	Symbols: | Rho-GTPase-activating protein-related | chr4:16940870-16941679 REVERSE	9884.13	8184.74
Brapa_ESTC000047	AT2G46540	Symbols: | similar to fiber protein Fb11 [Gossypium barbadense] (GB:AAN77150.1) | chr2:19117759-19118753 REVERSE	10316	8833.2
Brapa_ESTC000048	AT2G27710	Symbols: | 60S acidic ribosomal protein P2 (RPP2B) | chr2:11824006-11824747 FORWARD	26816.3	32027.6
Brapa_ESTC000049	AT1G27130	Symbols: GST12, ATGSTU13 | ATGSTU13 (GLUTATHIONE S-TRANSFERASE 12); glutathione transferase | chr1:9425569-9426584 FORWARD	2923.69	5183.43
Brapa_ESTC000050	AT4G11600	Symbols: PHGPX, LSC803, ATGPX6 | ATGPX6 (GLUTATHIONE PEROXIDASE 6); glutathione peroxidase | chr4:7010015-7011324 REVERSE	12463.2	6786.93
Brapa_ESTC000051	AT2G44360	Symbols: | similar to Os09g0553800 [Oryza sativa (japonica cultivar-group)] (GB:NP_001063883.1); contains domain BRCT domain (SSF52113) | chr2:18327931-18328660 REVERSE	10235	12443.6
Brapa_ESTC000052	AT2G44350	Symbols: CSY4, ATCS | ATCS (CITRATE SYNTHASE 4); citrate (SI)-synthase | chr2:18323749-18327600 FORWARD	2939.39	1070.01
Brapa_ESTC000053	AT2G36100	Symbols: | integral membrane family protein | chr2:15166823-15167748 REVERSE	148.683	209.286
Brapa_ESTC000054	AT3G12930	Symbols: | similar to Os09g0493600 [Oryza sativa (japonica cultivar-group)] (GB:NP_001063546.1); similar to Protein Iojap (GB:Q41822); contains InterPro domain Iojap-related protein; (InterPro:IPR004394) | chr3:4128472-4129623 FORWARD	329.565	1876.78
Brapa_ESTC000055	AT1G64370	Symbols: | similar to hypothetical protein FG03565.1 [Gibberella zeae PH-1] (GB:XP_383741.1) | chr1:23892630-23893166 FORWARD	50888.7	53430.2
Brapa_ESTC000056	AT5G44430	Symbols: PDF1.2c | PDF1.2c (plant defensin 1.2c) | chr5:17926319-17926671 REVERSE	33552.5	42852.2
Brapa_ESTC000057	AT1G09560	Symbols: GLP5 | GLP5 (GERMIN-LIKE PROTEIN 5); manganese ion binding / metal ion binding / nutrient reservoir | chr1:3093898-3094641 FORWARD	4666.64	1006.32
Brapa_ESTC000058	AT5G16130	Symbols: | 40S ribosomal protein S7 (RPS7C) | chr5:5268987-5269915 FORWARD	18621.9	24223.4
Brapa_ESTC000059	AT3G16570	Symbols: RALFL23 | RALFL23 (RALF-LIKE 23) | chr3:5644754-5645170 FORWARD	16569.3	7843.84
Brapa_ESTC000060	AT2G30060	Symbols: | Ran-binding protein 1b (RanBP1b) | chr2:12834112-12835628 FORWARD	13869.2	17682.7
Brapa_ESTC000061	AT5G15350	Symbols: | plastocyanin-like domain-containing protein | chr5:4985187-4986157 REVERSE	283.275	150.344
Brapa_ESTC000062	AT1G31330	Symbols: PSAF | PSAF (photosystem I subunit F) | chr1:11214992-11215920 REVERSE	85.39	245.483
Brapa_ESTC000063	AT2G29090	Symbols: CYP707A2 | CYP707A2 (cytochrome P450, family 707, subfamily A, polypeptide 2); oxygen binding | chr2:12502115-12506157 REVERSE	650.026	484.243
Brapa_ESTC000064	AT2G02130	Symbols: PDF2.3, LCR68 | LCR68/PDF2.3 (Low-molecular-weight cysteine-rich 68); protease inhibitor | chr2:540070-540406 FORWARD	973.159	1029
Brapa_ESTC000065	AT3G60770	Symbols: | 40S ribosomal protein S13 (RPS13A) | chr3:22471500-22472631 REVERSE	6546.22	7219.24
Brapa_ESTC000066	AT3G15580	Symbols: ATG8I, APG8H | APG8H (autophagy 8H); microtubule binding | chr3:5274082-5275007 REVERSE	18986.2	24056.9
Brapa_ESTC000067	AT5G63280	Symbols: | zinc finger (C2H2 type) family protein | chr5:25384311-25386074 FORWARD	1307.37	1007.25
Brapa_ESTC000068	AT2G46600	Symbols: | calcium-binding protein, putative | chr2:19143141-19143548 FORWARD	31413.6	32162.8
Brapa_ESTC000069	AT1G11840	Symbols: ATGLX1 | ATGLX1 (GLYOXALASE I HOMOLOG); lactoylglutathione lyase | chr1:3996044-3997517 FORWARD	9326.39	22508.2
Brapa_ESTC000070	AT5G64140	Symbols: RPS28 | RPS28 (RIBOSOMAL PROTEIN S28); structural constituent of ribosome | chr5:25684755-25684949 REVERSE	4828.61	6860.8
Brapa_ESTC000071	AT5G43700	Symbols: IAA4, ATAUX2-11 | ATAUX2-11 (indoleacetic acid-induced protein 4); transcription factor | chr5:17567692-17568433 FORWARD	1423.08	3030.03
Brapa_ESTC000072	AT5G08540	Symbols: | similar to Os04g0527800 [Oryza sativa (japonica cultivar-group)] (GB:NP_001053370.1); similar to RNA-binding protein RBM5 and related proteins, contain G-patch and RRM domains (ISS) [Ostreococcus tauri] (GB:CAL57083.1) | chr5:2763915-2765432 FORWARD	79.5352	72.6534
Brapa_ESTC000073	AT1G32230	Symbols: CEO, ATP8, CEO1, RCD1 | RCD1 (RADICAL-INDUCED CELL DEATH1) | chr1:11613407-11615874 FORWARD	27797.2	16897.3
Brapa_ESTC000074	AT1G02500	Symbols: SAM-1, MAT1, SAM1 | SAM1 (S-adenosylmethionine synthetase 1); methionine adenosyltransferase | chr1:519037-520218 FORWARD	12487	4292.71
Brapa_ESTC000075	AT5G55160	Symbols: SUMO 2, SUMO2, SUM2 | SUM2 (SMALL UBIQUITIN-LIKE MODIFIER 2) | chr5:22400973-22401998 REVERSE	21461.9	27356.8
Brapa_ESTC000076	AT5G57655	Symbols: | xylose isomerase family protein | chr5:23364256-23367031 FORWARD	4858.12	7942.63
Brapa_ESTC000077	AT4G33355	| Symbols: | lipid binding | chr4:16067101-16067572 FORWARD	103.839	172.174
Brapa_ESTC000078	AT4G19006	Symbols: | 26S proteasome regulatory subunit, putative (RPN9) | chr4:10409360-10411358 REVERSE	10722.5	4618.41
Brapa_ESTC000079	AT4G16190	Symbols: | cysteine proteinase, putative | chr4:9171527-9172892 FORWARD	3427.17	2659.07
Brapa_ESTC000080	AT5G53120	Symbols: SPMS, SPDS3 | SPDS3 (SPERMIDINE SYNTHASE 3) | chr5:21552655-21554879 FORWARD	5621.49	4564.75
Brapa_ESTC000081	AT4G01320	| Symbols: STE24, ATSTE24 | ATSTE24 | chr4:545905-549002 FORWARD	7488.63	10996.9
Brapa_ESTC000082	AT5G08180	Symbols: | ribosomal protein L7Ae/L30e/S12e/Gadd45 family protein | chr5:2631844-2633375 REVERSE	506.695	1093.19
Brapa_ESTC000083	AT4G36720	Symbols: HVA22K | HVA22K (HVA22-LIKE PROTEIN K) | chr4:17307773-17309672 FORWARD	2291.17	3270.67
Brapa_ESTC000084	AT4G36730	Symbols: GBF1 | GBF1 (G-box binding factor 1); transcription factor | chr4:17309854-17311756 REVERSE	13580.3	9854.45
Brapa_ESTC000085	AT4G17730	Symbols: ATSYP23, SYP23 | SYP23 (syntaxin 23); t-SNARE | chr4:9865364-9866648 FORWARD	15753	23063.4
Brapa_ESTC000086	AT1G02780	Symbols: EMB2386 | EMB2386 (EMBRYO DEFECTIVE 2386); structural constituent of ribosome | chr1:608120-609391 REVERSE	5971.47	1378.12
Brapa_ESTC000087	AT2G45990	Symbols: | similar to conserved hypothetical protein [Medicago truncatula] (GB:ABE80178.1); contains domain no description (G3D.3.40.50.1000); contains domain HAD-like (SSF56784) | chr2:18926475-18928116 FORWARD	1400.98	1486.95
Brapa_ESTC000088	AT2G46000	Symbols: | similar to conserved hypothetical protein [Medicago truncatula] (GB:ABE80176.1) | chr2:18928267-18929120 REVERSE	864.443	1261
Brapa_ESTC000089	AT4G26300	Symbols: EMB1027 | EMB1027 (EMBRYO DEFECTIVE 1027); ATP binding / arginine-tRNA ligase | chr4:13308409-13313118 REVERSE	3068.32	2448.29
Brapa_ESTC000090	no_hits_f	---------	33.7764	53.739
Brapa_ESTC000091	AT4G15885	Symbols: | kinesin motor protein-related | chr4:9016466-9016993 REVERSE	1178.12	1060.8
Brapa_ESTC000092	AT3G22230	Symbols: | 60S ribosomal protein L27 (RPL27B) | chr3:7844143-7844550 REVERSE	22449.4	22299.2
Brapa_ESTC000093	AT1G70780	Symbols: | similar to unknown protein [Arabidopsis thaliana] (TAIR:AT1G23150.1); similar to putative senescence-associated protein [Pisum sativum] (GB:BAB33412.1) | chr1:26699124-26699637 REVERSE	2163.04	1680.29
Brapa_ESTC000094	AT5G16660	Symbols: | similar to unknown protein [Arabidopsis thaliana] (TAIR:AT3G02900.1); similar to hypothetical protein [Plantago major] (GB:CAH59416.1) | chr5:5465702-5467009 REVERSE	5963.91	11754.1
Brapa_ESTC000095	AT4G34850	Symbols: | chalcone and stilbene synthase family protein | chr4:16608354-16609725 FORWARD	184.029	246.107
Brapa_ESTC000096	AT4G04210	Symbols: PUX4 | PUX4 (LANT UBX DOMAIN-CONTAINING PROTEIN 4) | chr4:2030389-2031668 FORWARD	16323.9	22657.1
Brapa_ESTC000097	AT1G07790	| Symbols: | histone H2B, putative | chr1:2413046-2413492 FORWARD	27054.9	16478.2
Brapa_ESTC000098	AT4G23630	Symbols: BTI1 | BTI1 (VIRB2-INTERACTING PROTEIN 1) | chr4:12318080-12319584 FORWARD	13424.9	11995.7
Brapa_ESTC000099	AT2G42570	Symbols: | similar to unknown protein [Arabidopsis thaliana] (TAIR:AT2G31110.2); similar to unknown [Pisum sativum] (GB:ABA29158.1); contains InterPro domain Protein of unknown function DUF231, plant; (InterPro:IPR004253) | chr2:17724576-17726999 REVERSE	473.324	2028.51
Brapa_ESTC000100	AT4G35760	Symbols: | electron carrier/ protein disulfide oxidoreductase | chr4:16942738-16944627 REVERSE	705.615	6865.7
Brapa_ESTC000101	AT2G18740	Symbols: | small nuclear ribonucleoprotein E, putative / snRNP-E, putative / Sm protein E, putative | chr2:8130416-8131792 FORWARD	17761	24393.9
Brapa_ESTC000102	AT4G00860	Symbols: ATOZI1 | ATOZI1 (Arabidopsis thaliana ozone-induced protein 1) | chr4:359548-359868 REVERSE	5472.49	10635.1
Brapa_ESTC000103	AT1G68070	Symbols: | zinc finger (C3HC4-type RING finger) family protein | chr1:25519075-25520430 REVERSE	2148.28	4594.27
Brapa_ESTC000104	AT2G19570	Symbols: AT-CDA1, DESZ, CDA1 | CDA1 (CYTIDINE DEAMINASE 1) | chr2:8477680-8478585 REVERSE	3208.1	3038.22
Brapa_ESTC000105	AT2G32720	Symbols: B5 #4 | B5 #4 (cytochrome b5 family protein #4); heme binding / transition metal ion binding | chr2:13884090-13885524 REVERSE	437.566	1559.89
Brapa_ESTC000106	AT5G07230	Symbols: | protease inhibitor/seed storage/lipid transfer protein (LTP) family protein | chr5:2271014-2271409 FORWARD	61.433	157.265
Brapa_ESTC000107	AT1G16880	Symbols: | uridylyltransferase-related | chr1:5773789-5776118 FORWARD	10781.9	13483.4
Brapa_ESTC000108	no_hits_f	---------	257.014	357.09
Brapa_ESTC000109	AT4G02080	Symbols: ATSARA1C, ATSAR2, ASAR1 | ASAR1 (Arabidopsis thaliana secretion-associated RAS super family 2); GTP binding | chr4:921554-922547 FORWARD	38481.7	31441.4
Brapa_ESTC000110	AT1G55490	Symbols: LEN1, CPN60B | CPN60B (CHAPERONIN 60 BETA); ATP binding / protein binding / unfolded protein binding | chr1:20719383-20722339 REVERSE	4405.67	7733.6
Brapa_ESTC000111	AT3G14960	Symbols: | galactosyltransferase family protein | chr3:5036259-5037958 REVERSE	227.783	139.695
Brapa_ESTC000112	AT4G20350	Symbols: | similar to Picornavirus 2B protein [Medicago truncatula] (GB:ABE88460.1) | chr4:10988741-10989744 FORWARD	1024.62	2402.53
Brapa_ESTC000113	AT5G13170	Symbols: | nodulin MtN3 family protein | chr5:4181334-4183174 REVERSE	1135.18	694.057
Brapa_ESTC000114	AT4G33355	| Symbols: | lipid binding | chr4:16067101-16067572 FORWARD	59.3952	92.1676
Brapa_ESTC000115	AT1G65730	Symbols: YSL7 | YSL7 (YELLOW STRIPE LIKE 7); oligopeptide transporter | chr1:24446302-24449785 FORWARD	727.098	518.541
Brapa_ESTC000116	AT5G42020	Symbols: BIP | BIP (LUMINAL BINDING PROTEIN); ATP binding | chr5:16824925-16827708 REVERSE	16815.6	8274.11
Brapa_ESTC000118	AT5G07690	Symbols: AtMYB29, MYB29 | MYB29 (myb domain protein 29); DNA binding / transcription factor | chr5:2447091-2448286 FORWARD	98.2295	83.2898
Brapa_ESTC000119	AT1G19840	Symbols: | auxin-responsive family protein | chr1:6872785-6873246 REVERSE	271.89	159.499
Brapa_ESTC000120	AT5G59850	Symbols: | 40S ribosomal protein S15A (RPS15aF) | chr5:24129725-24130310 REVERSE	5396.4	8052.63
Brapa_ESTC000121	AT5G59690	| Symbols: | histone H4 | chr5:24068875-24069186 FORWARD	12166.1	13139.5
Brapa_ESTC000122	AT1G74270	Symbols: | 60S ribosomal protein L35a (RPL35aC) | chr1:27932076-27933127 REVERSE	12315.5	19292.9
Brapa_ESTC000123	AT1G65290	Symbols: | acyl carrier family protein / ACP family protein | chr1:24252751-24254029 REVERSE	9828.08	12557.7
Brapa_ESTC000124	AT1G67300	Symbols: | hexose transporter, putative | chr1:25197495-25200414 REVERSE	1479.37	1025.32
Brapa_ESTC000125	AT2G36880	Symbols: MAT3 | MAT3 (METHIONINE ADENOSYLTRANSFERASE 3); methionine adenosyltransferase | chr2:15486800-15487972 REVERSE	10728.8	4695.68
Brapa_ESTC000126	AT4G32410	Symbols: CESA1, RSW1 | CESA1 (CELLULASE SYNTHASE 1); transferase, transferring glycosyl groups | chr4:15641015-15646394 REVERSE	6056.36	2200.51
Brapa_ESTC000127	AT3G15710	Symbols: | signal peptidase, putative | chr3:5323571-5324792 REVERSE	16779.5	25892.2
Brapa_ESTC000128	AT5G55400	Symbols: | fimbrin-like protein, putative | chr5:22472761-22476176 REVERSE	770.144	762.668
Brapa_ESTC000129	AT2G23350	Symbols: PAB4 | PAB4 (POLY(A) BINDING PROTEIN 4); RNA binding / translation initiation factor | chr2:9950289-9953121 FORWARD	8186.33	4524.82
Brapa_ESTC000130	AT1G30360	Symbols: ERD4 | ERD4 (EARLY-RESPONSIVE TO DEHYDRATION 4) | chr1:10715874-10718781 FORWARD	9700.5	2942.85
Brapa_ESTC000131	AT3G15450	Symbols: | similar to unknown protein [Arabidopsis thaliana] (TAIR:AT4G27450.1); similar to unknown [Glycine max] (GB:AAG00940.1); contains domain ASPARAGINE SYNTHETASE (PTHR11772); contains domain no description (G3D.3.60.20.10); contains domain N-terminal nucleophile aminohydrolases (Ntn hydrolases) (SSF56235) | chr3:5213057-5214005 FORWARD	37597.4	26773.6
Brapa_ESTC000132	AT3G47520	Symbols: MDH | MDH (malate dehydrogenase); malate dehydrogenase | chr3:17524642-17525853 FORWARD	1778.93	675.873
Brapa_ESTC000133	AT1G74880	Symbols: NDH-O | NDH-O (NAD(P)H:PLASTOQUINONE DEHYDROGENASE COMPLEX SUBUNIT O) | chr1:28133773-28134681 REVERSE	42.9211	17.9874
Brapa_ESTC000134	AT1G74870	Symbols: | protein binding / zinc ion binding | chr1:28130754-28131936 FORWARD	896.551	1365
Brapa_ESTC000135	AT5G54270	Symbols: LHCB3*1, LHCB3 | LHCB3 (LIGHT-HARVESTING CHLOROPHYLL BINDING PROTEIN 3) | chr5:22055650-22056609 FORWARD	2251.12	20963.8
Brapa_ESTC000136	AT4G15000	Symbols: | 60S ribosomal protein L27 (RPL27C) | chr4:8571892-8572299 FORWARD	25418.6	22153.4
Brapa_ESTC000137	AT3G16490	Symbols: IQD26 | IQD26 (IQ-domain 26); calmodulin binding | chr3:5603968-5605495 REVERSE	35.4626	47.7044
Brapa_ESTC000138	AT2G31305	Symbols: | similar to hypothetical protein DDBDRAFT_0190820 [Dictyostelium discoideum AX4] (GB:XP_646558.1); similar to Os05g0270400 [Oryza sativa (japonica cultivar-group)] (GB:NP_001055058.1); contains InterPro domain Protein phosphatase inhibitor; (InterPro:IPR011107) | chr2:13357986-13358309 FORWARD	4317.91	6266.09
Brapa_ESTC000139	AT4G16442	Symbols: | integral membrane family protein | chr4:9272064-9272992 REVERSE	2253.97	2461.62
Brapa_ESTC000140	AT5G57345	Symbols: | similar to unknown protein [Arabidopsis thaliana] (TAIR:AT1G54520.1); similar to conserved hypothetical protein [Medicago truncatula] (GB:ABE83998.1); contains domain N-terminal nucleophile aminohydrolases (Ntn hydrolases) (SSF56235) | chr5:23246788-23247813 REVERSE	2265.47	9640.45
Brapa_ESTC000141	AT4G10450	Symbols: | 60S ribosomal protein L9 (RPL90D) | chr4:6463197-6464454 REVERSE	1583.5	3281.7
Brapa_ESTC000142	AT3G16640	Symbols: TCTP | TCTP (TRANSLATIONALLY CONTROLLED TUMOR PROTEIN) | chr3:5669715-5670735 REVERSE	42681	32885.7
Brapa_ESTC000143	AT2G20820	Symbols: | similar to hypothetical protein [Capsicum chinense] (GB:CAJ13713.1) | chr2:8971531-8972247 FORWARD	14438.8	10790.9
Brapa_ESTC000144	AT1G12900	Symbols: GAPA-2 | GAPA-2; glyceraldehyde-3-phosphate dehydrogenase | chr1:4392632-4394281 REVERSE	11841.2	33993
Brapa_ESTC000145	AT5G03640	Symbols: | protein kinase family protein | chr5:927914-930780 FORWARD	1540.71	1075.58
Brapa_ESTC000146	AT3G62870	Symbols: | 60S ribosomal protein L7A (RPL7aB) | chr3:23253837-23255248 REVERSE	9926.25	12403.1
Brapa_ESTC000147	no_hits_f	---------	143.563	76.1521
Brapa_ESTC000148	no_hits_f	---------	12.7609	9.6066
Brapa_ESTC000149	AT3G20230	Symbols: | 50S ribosomal protein L18 family | chr3:7055645-7056685 REVERSE	532.762	2132.3
Brapa_ESTC000150	AT2G36020	Symbols: HVA22J | abscisic acid-responsive HVA22 family protein | chr2:15130503-15132219 REVERSE	376.844	491.824
Brapa_ESTC000151	AT3G23300	Symbols: | dehydration-responsive protein-related | chr3:8333528-8335909 FORWARD	4471.64	2488.51
Brapa_ESTC000153	AT1G76760	Symbols: ATY1 | ATY1 (Arabidopsis thioredoxin y1); thiol-disulfide exchange intermediate | chr1:28816767-28817842 REVERSE	2035.18	2263.01
Brapa_ESTC000154	AT1G48020	Symbols: | invertase/pectin methylesterase inhibitor family protein | chr1:17719903-17720433 REVERSE	76.7133	66.0129
Brapa_ESTC000155	AT3G43120	Symbols: | auxin-responsive protein-related | chr3:15105632-15106300 FORWARD	16.2897	16.5993
Brapa_ESTC000156	AT1G55560	Symbols: SKS14 | SKS14 (SKU5 Similar 14); copper ion binding / oxidoreductase | chr1:20758140-20760193 REVERSE	309.841	543.453
Brapa_ESTC000157	AT1G26690	Symbols: | emp24/gp25L/p24 family protein | chr1:9224286-9225669 REVERSE	3541.69	3446.26
Brapa_ESTC000158	AT3G52360	Symbols: | similar to unknown protein [Arabidopsis thaliana] (TAIR:AT2G35850.1) | chr3:19423321-19423673 FORWARD	824.495	1162.89
Brapa_ESTC000159	AT1G74220	Symbols: | similar to unknown protein [Arabidopsis thaliana] (TAIR:AT2G03630.1); similar to Os07g0298100 [Oryza sativa (japonica cultivar-group)] (GB:NP_001059417.1) | chr1:27916760-27917795 REVERSE	1644.08	1478.77
Brapa_ESTC000160	AT1G74210	Symbols: | glycerophosphoryl diester phosphodiesterase family protein | chr1:27914057-27916446 FORWARD	713.008	2925.91
Brapa_ESTC000161	no_hits_f	---------	8648.55	6938.88
Brapa_ESTC000162	AT3G62170	Symbols: VGDH2 | VGDH2 (VANGUARD 1 HOMOLOG 2); pectinesterase | chr3:23027470-23029312 REVERSE	145.881	177.781
Brapa_ESTC000163	AT5G04920	Symbols: | vacuolar protein sorting 36 family protein / VPS36 family protein | chr5:1439173-1441546 REVERSE	783.469	710.194
Brapa_ESTC000164	AT4G32600	Symbols: | zinc finger (C3HC4-type RING finger) family protein | chr4:15724016-15725743 FORWARD	4262.13	1335.2
Brapa_ESTC000165	AT1G20620	Symbols: SEN2, CAT3 | CAT3 (CATALASE 3); catalase | chr1:7143132-7146183 FORWARD	45990.9	32575.2
Brapa_ESTC000166	AT3G56940	Symbols: CRD1, CHL27, ACSF, AT103 | AT103 (DICARBOXYLATE DIIRON 1) | chr3:21087573-21089248 FORWARD	3913.43	10928.6
Brapa_ESTC000167	AT1G64520	Symbols: | 26S proteasome regulatory subunit, putative (RPN12) | chr1:23960122-23961783 FORWARD	1435.06	2620.38
Brapa_ESTC000168	AT3G19000	Symbols: | oxidoreductase, 2OG-Fe(II) oxygenase family protein | chr3:6553674-6554993 REVERSE	83.2402	54.5228
Brapa_ESTC000169	AT1G32470	Symbols: | glycine cleavage system H protein, mitochondrial, putative | chr1:11739459-11740226 REVERSE	1864.25	13786.1
Brapa_ESTC000170	AT1G22840	Symbols: CYTC-1, ATCYTC-A | ATCYTC-A/CYTC-1 (CYTOCHROME C-1); electron carrier | chr1:8079373-8080275 FORWARD	375.063	302.17
Brapa_ESTC000171	AT1G27940	Symbols: PGP13 | PGP13 (P-GLYCOPROTEIN 13); ATPase, coupled to transmembrane movement of substances | chr1:9733584-9738116 REVERSE	588.339	619.883
Brapa_ESTC000172	AT3G60770	Symbols: | 40S ribosomal protein S13 (RPS13A) | chr3:22471500-22472631 REVERSE	25705	35268.5
Brapa_ESTC000173	AT4G29850	Symbols: | similar to unknown protein [Arabidopsis thaliana] (TAIR:AT2G19350.1); similar to unknown [Gymnadenia conopsea] (GB:ABD66514.1); contains InterPro domain Protein of unknown function DUF872, eukaryotic; (InterPro:IPR008590) | chr4:14601824-14602880 REVERSE	486.168	3701.66
Brapa_ESTC000174	AT5G63440	Symbols: | similar to unknown protein [Arabidopsis thaliana] (TAIR:AT1G49170.1); similar to Exosomal 3'-5' exoribonuclease complex, subunit Rrp44/Dis3 (ISS) [Ostreococcus tauri] (GB:CAL57463.1); similar to Os07g0295200 [Oryza sativa (japonica cultivar-group)] (GB:NP_001059406.1); contains InterPro domain Protein of unknown function DUF167; (InterPro:IPR003746) | chr5:25423635-25425421 FORWARD	1367.06	1388.48
Brapa_ESTC000175	AT4G12070	Symbols: | similar to hypothetical protein [Oryza sativa (japonica cultivar-group)] (GB:BAD12897.1); similar to Os02g0717600 [Oryza sativa (japonica cultivar-group)] (GB:NP_001047934.1) | chr4:7231935-7234266 FORWARD	299.439	211.471
Brapa_ESTC000176	no_hits_f	---------	1117.74	905.866
Brapa_ESTC000177	AT3G22550	Symbols: | senescence-associated protein-related | chr3:7991834-7992812 REVERSE	544.356	124.779
Brapa_ESTC000178	AT5G08570	Symbols: | pyruvate kinase, putative | chr5:2778434-2780301 FORWARD	2700.85	3525.6
Brapa_ESTC000179	no_hits_f	---------	4396.57	2388.64
Brapa_ESTC000180	AT3G62630	Symbols: | similar to calmodulin-binding protein [Arabidopsis thaliana] (TAIR:AT2G15760.1); similar to conserved hypothetical protein [Medicago truncatula] (GB:ABE84267.1); contains InterPro domain Protein of unknown function DUF1645; (InterPro:IPR012442) | chr3:23174913-23176055 REVERSE	4691	3232.55
Brapa_ESTC000181	AT1G30690	| Symbols: | transporter | chr1:10888266-10890067 FORWARD	4188.46	3673
Brapa_ESTC000182	AT1G14320	Symbols: | 60S ribosomal protein L10 (RPL10A) / Wilm's tumor suppressor protein-related | chr1:4888265-4889403 FORWARD	44155.6	36669.2
Brapa_ESTC000183	AT1G70830	Symbols: MLP28 | MLP28 (MLP-LIKE PROTEIN 28) | chr1:26713865-26714912 REVERSE	752.775	2142.93
Brapa_ESTC000184	AT5G56710	Symbols: | 60S ribosomal protein L31 (RPL31C) | chr5:22961229-22961993 REVERSE	20355.7	29706.1
Brapa_ESTC000185	AT5G63030	Symbols: | glutaredoxin, putative | chr5:25303578-25304743 FORWARD	4280.24	8574.59
Brapa_ESTC000186	AT1G54220	Symbols: | dihydrolipoyllysine-residue acetyltransferase | chr1:20250127-20253875 REVERSE	4217.86	2394.45
Brapa_ESTC000187	AT5G56980	Symbols: | similar to unknown protein [Arabidopsis thaliana] (TAIR:AT4G26130.1); similar to cDNA-5-encoded protein (GB:AAA50235.1) | chr5:23073800-23074939 REVERSE	1548.2	573.467
Brapa_ESTC000188	AT1G47260	Symbols: GAMMA CA2, APFI | APFI; carbonate dehydratase | chr1:17323824-17325787 REVERSE	6166.43	13290.3
Brapa_ESTC000189	AT2G43770	Symbols: | transducin family protein / WD-40 repeat family protein | chr2:18141349-18142380 REVERSE	2315.11	1384.76
Brapa_ESTC000190	AT1G74270	Symbols: | 60S ribosomal protein L35a (RPL35aC) | chr1:27932076-27933127 REVERSE	44883.6	47637.5
Brapa_ESTC000191	AT4G14710	| Symbols: ATARD2 | ATARD2 | chr4:8424892-8426355 REVERSE	7937.03	16476.5
Brapa_ESTC000192	AT1G57660	Symbols: | 60S ribosomal protein L21 (RPL21E) | chr1:21359232-21360029 FORWARD	12821.3	21042.5
Brapa_ESTC000193	AT5G22440	Symbols: | 60S ribosomal protein L10A (RPL10aC) | chr5:7435331-7436489 REVERSE	15253.5	23925.5
Brapa_ESTC000194	AT4G14110	Symbols: CSN8, FUS7, EMB143, COP9 | COP9 (CONSTITUTIVE PHOTOMORPHOGENIC 9) | chr4:8133044-8134862 REVERSE	2345.28	6555.66
Brapa_ESTC000195	AT1G61770	Symbols: | DNAJ heat shock N-terminal domain-containing protein | chr1:22813885-22816035 FORWARD	4292.65	5617.92
Brapa_ESTC000196	AT4G21980	Symbols: ATG8A, APG8A | APG8A (autophagy 8A) | chr4:11655880-11656821 FORWARD	14362.2	17751.2
Brapa_ESTC000197	AT4G30390	| Symbols: | unknown protein | chr4:14862230-14862912 REVERSE	5672.88	2710.83
Brapa_ESTC000198	AT2G18040	Symbols: PIN1AT | PIN1AT (parvulin 1At) | chr2:7849428-7850619 FORWARD	3568.04	5393.89
Brapa_ESTC000199	AT4G27090	Symbols: | 60S ribosomal protein L14 (RPL14B) | chr4:13594110-13595193 REVERSE	31413	36600.4
Brapa_ESTC000200	AT5G02380	Symbols: MT2B | MT2B (METALLOTHIONEIN 2B) | chr5:506753-507162 REVERSE	36493.2	51321.2
Brapa_ESTC000201	AT4G10300	Symbols: | similar to unknown protein [Arabidopsis thaliana] (TAIR:AT3G04300.1); similar to Os04g0445200 [Oryza sativa (japonica cultivar-group)] (GB:NP_001052900.1); similar to Cupin, RmlC-type [Medicago truncatula] (GB:ABE82642.1); similar to OSIGBa0140O07.4 [Oryza sativa (indica cultivar-group)] (GB:CAH67236.1); contains InterPro domain Protein of unknown function DUF861, cupin_3; (InterPro:IP…	3841.49	4970.33
Brapa_ESTC000202	AT4G04950	Symbols: | thioredoxin family protein | chr4:2517880-2519922 REVERSE	6804.12	8630.1
Brapa_ESTC000203	AT1G35720	Symbols: OXY5, ATOXY5, ANNAT1 | ANNAT1 (ANNEXIN ARABIDOPSIS 1); calcium ion binding / calcium-dependent phospholipid binding | chr1:13226516-13228151 FORWARD	18572.9	12738.3
Brapa_ESTC000204	AT5G27540	Symbols: EMB2473 | EMB2473 (EMBRYO DEFECTIVE 2473); GTP binding / calcium ion binding | chr5:9722819-9727115 FORWARD	4327.31	2078.89
Brapa_ESTC000205	AT2G45960	Symbols: PIP1B, TMP-A, ATHH2, PIP1;2 | PIP1B (plasma membrane intrinsic protein 1;2) | chr2:18917523-18918817 FORWARD	19172.7	22223.4
Brapa_ESTC000206	AT2G42310	Symbols: | similar to unknown protein [Arabidopsis thaliana] (TAIR:AT3G57785.1); similar to Os09g0487500 [Oryza sativa (japonica cultivar-group)] (GB:NP_001063525.1); similar to BAC19.9 [Lycopersicon esculentum] (GB:AAG01124.1) | chr2:17632329-17632673 FORWARD	3129.41	2942.79
Brapa_ESTC000207	AT4G15000	Symbols: | 60S ribosomal protein L27 (RPL27C) | chr4:8571892-8572299 FORWARD	8997.19	12107.9
Brapa_ESTC000208	AT1G77840	Symbols: | eukaryotic translation initiation factor 5, putative / eIF-5, putative | chr1:29273981-29275294 FORWARD	2847.84	1609.61
Brapa_ESTC000209	AT2G24765	Symbols: ARF3, ARL1, ATARL1 | ARF3/ARL1/ATARL1 (ADP-RIBOSYLATION FACTOR 3); protein binding | chr2:10569901-10572040 FORWARD	3536.94	11997.6
Brapa_ESTC000210	AT3G02080	Symbols: | 40S ribosomal protein S19 (RPS19A) | chr3:364145-365168 REVERSE	23310.3	31307.9
Brapa_ESTC000211	AT1G04270	Symbols: RPS15 | RPS15 (RIBOSOMAL PROTEIN S15); structural constituent of ribosome | chr1:1141851-1142959 REVERSE	21777.5	25562.6
Brapa_ESTC000212	AT1G73260	Symbols: | trypsin and protease inhibitor family protein / Kunitz family protein | chr1:27551071-27551718 REVERSE	2291.74	2404.67
Brapa_ESTC000213	AT3G55750	Symbols: | 60S ribosomal protein L35a (RPL35aD) | chr3:20709620-20710532 FORWARD	13005.8	14323.9
Brapa_ESTC000214	AT3G46000	Symbols: ADF2 | ADF2 (ACTIN DEPOLYMERIZING FACTOR 2); actin binding | chr3:16918728-16919807 REVERSE	14767.1	10667.1
Brapa_ESTC000215	AT2G39460	Symbols: RPL23A, ATRPL23A | ATRPL23A (RIBOSOMAL PROTEIN L23A); RNA binding / structural constituent of ribosome | chr2:16482127-16482982 FORWARD	4883.88	11307.7
Brapa_ESTC000216	AT2G03680	Symbols: SKU6, SPR1 | SPR1 (SPIRAL1) | chr2:1121395-1121847 FORWARD	3249.74	2106.89
Brapa_ESTC000217	AT1G09750	Symbols: | chloroplast nucleoid DNA-binding protein-related | chr1:3157543-3158962 FORWARD	115.821	96.2861
Brapa_ESTC000218	AT1G19950	Symbols: HVA22H | abscisic acid-responsive HVA22 family protein | chr1:6925034-6926518 FORWARD	1215.93	1085.48
Brapa_ESTC000219	AT4G34870	Symbols: ATCYP1, ROC5 | ROC5 (ROTAMASE CYP 5); peptidyl-prolyl cis-trans isomerase | chr4:16614456-16614974 FORWARD	16691	15653.2
Brapa_ESTC000220	AT3G22320	Symbols: ATRPABC24.3 | ATRPABC24.3 ("Arabidopsis thaliana RNA polymerase I, II and III 24.3 kDa subunit"); DNA binding / DNA-directed RNA polymerase | chr3:7891052-7892101 REVERSE	5423.24	9095.05
Brapa_ESTC000221	AT1G20530	Symbols: | similar to unknown protein [Arabidopsis thaliana] (TAIR:AT2G17110.1); similar to Os09g0547300 [Oryza sativa (japonica cultivar-group)] (GB:NP_001063849.1); similar to bzip-related transcription factor -like [Oryza sativa (japonica cultivar-group)] (GB:BAD46467.1); contains InterPro domain Protein of unknown function DUF632; (InterPro:IPR006867); contains InterPro domain Protein of unkn…	88.2277	155.649
Brapa_ESTC000222	AT1G69620	Symbols: RPL34 | RPL34 (RIBOSOMAL PROTEIN L34); structural constituent of ribosome | chr1:26193563-26194744 FORWARD	46040.5	50302.8
Brapa_ESTC000223	AT3G56110	Symbols: | prenylated rab acceptor (PRA1) family protein | chr3:20833207-20833836 REVERSE	2915.23	866.962
Brapa_ESTC000224	AT2G02100	Symbols: LCR69, PDF2.2 | LCR69/PDF2.2 (Low-molecular-weight cysteine-rich 69); protease inhibitor | chr2:528396-528884 FORWARD	49607.6	60918.2
Brapa_ESTC000225	AT1G65280	Symbols: | heat shock protein binding / unfolded protein binding | chr1:24249164-24252184 FORWARD	3370.58	1279.12
Brapa_ESTC000226	AT4G40045	Symbols: | similar to Os12g0206700 [Oryza sativa (japonica cultivar-group)] (GB:NP_001066383.1) | chr4:18559920-18560342 REVERSE	1216.81	3330.95
Brapa_ESTC000227	AT3G47470	Symbols: CAB4, LHCA4 | LHCA4 (Photosystem I light harvesting complex gene 4); chlorophyll binding | chr3:17504607-17505758 REVERSE	4836.65	30950.1
Brapa_ESTC000228	AT5G15200	Symbols: | 40S ribosomal protein S9 (RPS9B) | chr5:4935127-4936337 REVERSE	4879	7338.73
Brapa_ESTC000229	AT4G38900	| Symbols: | DNA binding | chr4:18139558-18141514 REVERSE	812.252	4322.92
Brapa_ESTC000230	AT5G38420	Symbols: | ribulose bisphosphate carboxylase small chain 2B / RuBisCO small subunit 2B (RBCS-2B) (ATS2B) | chr5:15398433-15399208 REVERSE	7247.36	17132.7
Brapa_ESTC000231	AT1G54340	Symbols: ICDH | ICDH (ICDH); isocitrate dehydrogenase (NADP+) | chr1:20287187-20290173 FORWARD	726.878	1444.34
Brapa_ESTC000232	AT5G54160	Symbols: OMT1, ATOMT1 | ATOMT1 (O-METHYLTRANSFERASE 1) | chr5:21999301-22001393 FORWARD	2181.92	4347.16
Brapa_ESTC000233	AT3G03100	Symbols: | NADH:ubiquinone oxidoreductase family protein | chr3:705571-707585 REVERSE	6202.56	8506.33
Brapa_ESTC000234	AT4G23690	Symbols: | disease resistance-responsive family protein / dirigent family protein | chr4:12339162-12339725 REVERSE	246.241	192.884
Brapa_ESTC000235	AT1G27970	Symbols: NTF2B | NTF2B (NUCLEAR TRANSPORT FACTOR 2B); Ran GTPase binding / protein transporter | chr1:9746908-9747774 FORWARD	705.343	184.973
Brapa_ESTC000236	AT4G23100	Symbols: GSH1, CAD2, PAD2, RML1 | RML1 (PHYTOALEXIN DEFICIENT 2, ROOT MERISTEMLESS 1); glutamate-cysteine ligase | chr4:12103469-12106762 REVERSE	12119.7	9745.45
Brapa_ESTC000237	AT4G31985	Symbols: | 60S ribosomal protein L39 (RPL39C) | chr4:15469937-15470372 FORWARD	17528.9	19420.2
Brapa_ESTC000238	AT1G32150	Symbols: | bZIP transcription factor family protein | chr1:11566002-11568297 FORWARD	2261.36	821.05
Brapa_ESTC000239	AT3G17020	Symbols: | universal stress protein (USP) family protein | chr3:5802734-5804069 REVERSE	29231.3	22273
Brapa_ESTC000240	AT5G56670	Symbols: | 40S ribosomal protein S30 (RPS30C) | chr5:22952639-22953207 REVERSE	2388.79	6071.75
Brapa_ESTC000241	AT1G17280	Symbols: UBC34 | UBC34 (ubiquitin-conjugating enzyme 32) | chr1:5917139-5919155 REVERSE	6289.4	1392.14
Brapa_ESTC000242	AT1G09150	Symbols: | pseudouridine synthase and archaeosine transglycosylase (PUA) domain-containing protein | chr1:2946601-2948910 FORWARD	2151.47	4544.02
Brapa_ESTC000243	AT1G72370	Symbols: AP40, RP40, RPSAA, P40 | P40 (40S ribosomal protein SA); structural constituent of ribosome | chr1:27246810-27248504 REVERSE	6629.05	5187.85
Brapa_ESTC000244	AT3G49910	Symbols: | 60S ribosomal protein L26 (RPL26A) | chr3:18515296-18515736 FORWARD	38017.6	36194.8
Brapa_ESTC000245	AT4G34800	Symbols: | auxin-responsive family protein | chr4:16596865-16597149 FORWARD	197.26	508.917
Brapa_ESTC000246	AT1G29920	Symbols: CAB2, AB165, LHCB1.1 | CAB2 (Chlorophyll a/b-binding protein 2); chlorophyll binding | chr1:10475073-10475876 REVERSE	25701.7	47323.8
Brapa_ESTC000247	AT5G63680	Symbols: | pyruvate kinase, putative | chr5:25507733-25509756 FORWARD	5183.86	4952.68
Brapa_ESTC000248	AT3G49910	Symbols: | 60S ribosomal protein L26 (RPL26A) | chr3:18515296-18515736 FORWARD	42129.1	49891.4
Brapa_ESTC000249	AT1G09200	| Symbols: | histone H3 | chr1:2971724-2972134 REVERSE	2941.1	2687.97
Brapa_ESTC000250	AT2G26350	Symbols: PEX10 | PEX10 (peroxin 10); protein binding / zinc ion binding | chr2:11224845-11227493 REVERSE	3903.39	3195.47
Brapa_ESTC000251	AT4G10450	Symbols: | 60S ribosomal protein L9 (RPL90D) | chr4:6463197-6464454 REVERSE	7420.24	9438.86
Brapa_ESTC000252	AT4G37925	Symbols: NDH-M | NDH-M (SUBUNIT NDH-M OF NAD(P)H:PLASTOQUINONE DEHYDROGENASE COMPLEX) | chr4:17830742-17831479 REVERSE	104.927	8814.84
Brapa_ESTC000253	AT3G05500	Symbols: | rubber elongation factor (REF) family protein | chr3:1593546-1594808 FORWARD	2316.32	6500.79
Brapa_ESTC000254	AT5G60680	Symbols: | similar to unknown protein [Arabidopsis thaliana] (TAIR:AT3G45210.1); similar to Protein of unknown function DUF584 [Medicago truncatula] (GB:ABE80969.1); contains InterPro domain Protein of unknown function DUF584; (InterPro:IPR007608) | chr5:24403473-24403964 FORWARD	5951.86	11765.9
Brapa_ESTC000255	no_hits_f	---------	4180.52	4351.43
Brapa_ESTC000256	AT5G58090	Symbols: | glycosyl hydrolase family 17 protein | chr5:23522782-23524419 REVERSE	62739.8	62932.2
Brapa_ESTC000257	AT1G53750	Symbols: RPT1A | RPT1A (regulatory particle triple-A 1A); ATPase | chr1:20069589-20071992 REVERSE	105.129	61.3296
Brapa_ESTC000258	AT1G53730	Symbols: | leucine-rich repeat transmembrane protein kinase, putative | chr1:20065439-20069143 FORWARD	8525.77	4805.69
Brapa_ESTC000259	no_hits_f	---------	153.306	271.396
Brapa_ESTC000260	AT3G51570	Symbols: | disease resistance protein (TIR-NBS-LRR class), putative | chr3:19137337-19141435 FORWARD	369.821	364.854
Brapa_ESTC000261	AT2G16510	Symbols: | vacuolar ATP synthase 16 kDa proteolipid subunit 5 / V-ATPase 16 kDa proteolipid subunit 5 (AVAP5) | chr2:7167089-7167893 REVERSE	18984.4	39419.8
Brapa_ESTC000262	AT5G09900	Symbols: EMB2107 | EMB2107 (EMBRYO DEFECTIVE 2107) | chr5:3089463-3092435 REVERSE	2984.94	4785.65
Brapa_ESTC000263	AT3G12650	Symbols: | similar to Os02g0718000 [Oryza sativa (japonica cultivar-group)] (GB:NP_001047937.1) | chr3:4017888-4018604 REVERSE	1105.51	1208.61
Brapa_ESTC000264	AT3G12640	Symbols: | RNA binding / nucleic acid binding | chr3:4014462-4017682 FORWARD	6887.62	5168.73
Brapa_ESTC000265	AT5G47120	Symbols: BI-1, ATBI1, ATBI-1 | ATBI-1 (ARABIDOPSIS BAX INHIBITOR 1) | chr5:19153298-19154812 FORWARD	1701.61	2152.74
Brapa_ESTC000266	AT3G02770	Symbols: | dimethylmenaquinone methyltransferase family protein | chr3:601024-601891 REVERSE	11051.6	13786.1
Brapa_ESTC000267	AT2G17975	Symbols: | zinc finger (Ran-binding) family protein | chr2:7829320-7831052 REVERSE	752.256	3631.54
Brapa_ESTC000268	AT2G17972	Symbols: | similar to conserved hypothetical protein [Medicago truncatula] (GB:ABE81091.1); similar to Os06g0715200 [Oryza sativa (japonica cultivar-group)] (GB:NP_001058582.1) | chr2:7828706-7829182 FORWARD	2715.25	15376
Brapa_ESTC000269	AT3G02040	Symbols: SRG3 | SRG3 (SENESCENCE-RELATED GENE 3); glycerophosphodiester phosphodiesterase | chr3:348512-349916 REVERSE	1365.81	1383.79
Brapa_ESTC000270	AT3G02030	Symbols: | hydrolase, alpha/beta fold family protein | chr3:345031-347820 FORWARD	531.86	645.144
Brapa_ESTC000271	no_hits_f	---------	62431.9	65214.1
Brapa_ESTC000272	AT3G01500	Symbols: CA1 | CA1 (CARBONIC ANHYDRASE 1); carbonate dehydratase/ zinc ion binding | chr3:195180-196723 REVERSE	245.274	7816.25
Brapa_ESTC000273	AT3G13200	Symbols: | Cwf15 / Cwc15 cell cycle control family protein | chr3:4242246-4243983 FORWARD	4079.82	1157.16
Brapa_ESTC000274	AT3G13220	Symbols: | ABC transporter family protein | chr3:4247975-4250710 REVERSE	643.599	712.404
Brapa_ESTC000275	AT1G04480	Symbols: | 60S ribosomal protein L23 (RPL23A) | chr1:1216109-1217256 FORWARD	38546.4	36038
Brapa_ESTC000276	AT2G18230	Symbols: ATPPA2 | inorganic pyrophosphatase (soluble) (PPA) / pyrophosphate phospho-hydrolase / PPase | chr2:7939221-7940642 REVERSE	5109.07	2109.02
Brapa_ESTC000277	AT3G09630	Symbols: | 60S ribosomal protein L4/L1 (RPL4A) | chr3:2953818-2955449 FORWARD	8985.52	2100.73
Brapa_ESTC000278	AT5G26280	Symbols: | meprin and TRAF homology domain-containing protein / MATH domain-containing protein | chr5:9208727-9210406 FORWARD	5227.01	20390.9
Brapa_ESTC000279	AT1G47420	Symbols: | Identical to Unknown protein At1g47420, mitochondrial precursor [Arabidopsis Thaliana] (GB:Q9SX77); similar to APFI, carbonate dehydratase [Arabidopsis thaliana] (TAIR:AT1G47260.1); similar to unknown [Hordeum vulgare subsp. vulgare] (GB:AAL77110.1) | chr1:17398214-17399616 REVERSE	400.152	186.151
Brapa_ESTC000280	AT1G47420	Symbols: | Identical to Unknown protein At1g47420, mitochondrial precursor [Arabidopsis Thaliana] (GB:Q9SX77); similar to APFI, carbonate dehydratase [Arabidopsis thaliana] (TAIR:AT1G47260.1); similar to unknown [Hordeum vulgare subsp. vulgare] (GB:AAL77110.1) | chr1:17398214-17399616 REVERSE	5806.86	3127.54
Brapa_ESTC000281	AT4G11660	Symbols: HSFB2B, AT-HSFB2B | AT-HSFB2B (Arabidopsis thaliana heat shock transcription factor B2B); transcription factor | chr4:7043000-7044221 FORWARD	2860.86	2522.46
Brapa_ESTC000282	AT4G11670	Symbols: | similar to unknown protein [Arabidopsis thaliana] (TAIR:AT5G06970.1); similar to Protein of unknown function DUF810 [Medicago truncatula] (GB:ABE85501.1); similar to OSIGBa0139P06.4 [Oryza sativa (indica cultivar-group)] (GB:CAH67031.1); similar to Os03g0683700 [Oryza sativa (japonica cultivar-group)] (GB:NP_001050913.1); contains InterPro domain Protein of unknown function DUF810; (In…	500.981	313.989
Brapa_ESTC000283	AT5G61840	| Symbols: GUT1 | GUT1; catalytic | chr5:24856591-24858929 REVERSE	2232.78	1178.05
Brapa_ESTC000284	AT2G03680	Symbols: SKU6, SPR1 | SPR1 (SPIRAL1) | chr2:1121395-1121847 FORWARD	1652.63	3159.5
Brapa_ESTC000285	AT5G55190	Symbols: RAN3 | RAN3; GTP binding | chr5:22409511-22411183 FORWARD	1911.23	1961.35
Brapa_ESTC000286	AT3G06040	Symbols: | ribosomal protein L12 family protein | chr3:1824522-1825082 REVERSE	3931.24	5265.87
Brapa_ESTC000287	AT3G09890	Symbols: | ankyrin repeat family protein | chr3:3032683-3034163 FORWARD	2120.16	2626.56
Brapa_ESTC000288	AT3G53890	Symbols: | 40S ribosomal protein S21 (RPS21B) | chr3:19966560-19967027 REVERSE	27292.1	37994.6
Brapa_ESTC000289	AT3G04120	Symbols: GAPC-1, GAPC | GAPC (GLYCERALDEHYDE-3-PHOSPHATE DEHYDROGENASE C SUBUNIT); glyceraldehyde-3-phosphate dehydrogenase | chr3:1081084-1083138 FORWARD	16252.5	10251.7
Brapa_ESTC000290	no_hits_f	---------	536.545	794.041
Brapa_ESTC000291	AT1G10590	Symbols: | DNA-binding protein-related | chr1:3502325-3502992 REVERSE	15366.8	14943.9
Brapa_ESTC000292	AT2G34480	Symbols: | 60S ribosomal protein L18A (RPL18aB) | chr2:14539995-14541240 REVERSE	9704.56	15347.8
Brapa_ESTC000293	AT2G18740	Symbols: | small nuclear ribonucleoprotein E, putative / snRNP-E, putative / Sm protein E, putative | chr2:8130416-8131792 FORWARD	7362.76	12689.6
Brapa_ESTC000294	AT3G50700	Symbols: ATIDD2 | ATIDD2 (ARABIDOPSIS THALIANA INDETERMINATE(ID)-DOMAIN 2); nucleic acid binding / transcription factor/ zinc ion binding | chr3:18851926-18853810 FORWARD	4443.26	1455.98
Brapa_ESTC000295	AT2G47980	Symbols: SCC3 | SCC3 (sister-chromatide cohesion protein 3); binding | chr2:19638493-19643865 FORWARD	3346.41	2122.83
Brapa_ESTC000296	AT1G80380	Symbols: | phosphoribulokinase/uridine kinase-related | chr1:30222787-30224676 FORWARD	22003.7	9213.41
Brapa_ESTC000297	AT3G06300	Symbols: AT-P4H-2 | AT-P4H-2 (A. THALIANA P4H ISOFORM 2); oxidoreductase, acting on paired donors, with incorporation or reduction of molecular oxygen, 2-oxoglutarate as one donor, and incorporation of one atom each of oxygen into both donors / procollagen-proline 4-dioxygen | chr3:1907750-1909681 FORWARD	6224.45	3402.09
Brapa_ESTC000298	AT5G20130	Symbols: | similar to unknown protein [Oryza sativa (japonica cultivar-group)] (GB:BAD46213.1); similar to Os09g0568100 [Oryza sativa (japonica cultivar-group)] (GB:NP_001063968.1) | chr5:6797487-6798702 FORWARD	6928.02	14962.5
Brapa_ESTC000299	AT5G10840	Symbols: | endomembrane protein 70, putative | chr5:3424911-3427798 REVERSE	552.195	279.494
Brapa_ESTC000300	AT5G10830	Symbols: | embryo-abundant protein-related | chr5:3423732-3424650 FORWARD	275.917	230.232
Brapa_ESTC000301	AT2G01520	Symbols: MLP328 | major latex protein-related / MLP-related | chr2:235991-236880 FORWARD	2094.66	2978.23
Brapa_ESTC000302	AT1G52300	Symbols: | 60S ribosomal protein L37 (RPL37B) | chr1:19478882-19479821 REVERSE	22590.9	21826.5
Brapa_ESTC000303	AT2G40070	Symbols: | similar to proline-rich family protein [Arabidopsis thaliana] (TAIR:AT3G09000.1); similar to Os01g0141900 [Oryza sativa (japonica cultivar-group)] (GB:NP_001041987.1); similar to putative proteophosphoglycan [Oryza sativa (japonica cultivar-group)] (GB:BAD61066.1) | chr2:16735456-16738238 REVERSE	613.636	406.363
Brapa_ESTC000304	AT2G41010	Symbols: ATCAMBP25 | ATCAMBP25 (ARABIDOPSIS THALIANA CALMODULIN (CAM)-BINDING PROTEIN OF 25 KDA); calmodulin binding | chr2:17121093-17121809 REVERSE	4378.51	876.487
Brapa_ESTC000305	AT5G55210	Symbols: | similar to unknown protein [Arabidopsis thaliana] (TAIR:AT4G22320.1); similar to conserved hypothetical protein [Medicago truncatula] (GB:ABD28485.1) | chr5:22413933-22414600 REVERSE	2632.71	4711.51
Brapa_ESTC000306	AT5G55200	Symbols: | co-chaperone grpE protein, putative | chr5:22411931-22413561 FORWARD	3330.59	2741.82
Brapa_ESTC000307	AT2G29700	Symbols: ATPH1 | ATPH1 (ARABIDOPSIS THALIANA PLECKSTRIN HOMOLOGUE 1) | chr2:12704648-12705085 FORWARD	13318.7	13757.6
Brapa_ESTC000308	AT1G23260	Symbols: MMZ1 | MMZ1 (MMS ZWEI HOMOLOGE 1); ubiquitin-protein ligase | chr1:8257198-8258562 REVERSE	8994.39	6550.4
Brapa_ESTC000309	AT5G02710	Symbols: | similar to Uncharacterised protein family containing protein, expressed [Oryza sativa (japonica cultivar-group)] (GB:ABF96102.1); similar to Os03g0363400 [Oryza sativa (japonica cultivar-group)] (GB:NP_001050164.1); contains InterPro domain Protein of unknown function UPF0153; (InterPro:IPR005358) | chr5:612626-613478 FORWARD	739.579	7635.41
Brapa_ESTC000310	no_hits_f	---------	173.218	334.26
Brapa_ESTC000311	AT2G34250	| Symbols: | protein translocase | chr2:14469714-14471651 FORWARD	17887.6	12812.3
Brapa_ESTC000312	AT5G43600	Symbols: | N-carbamyl-L-amino acid hydrolase, putative | chr5:17529878-17532507 FORWARD	4923.53	5513.98
Brapa_ESTC000313	AT1G52740	Symbols: | histone H2A, putative | chr1:19649077-19649889 FORWARD	22480.4	31076.5
Brapa_ESTC000314	AT3G48930	Symbols: EMB1080 | EMB1080 (EMBRYO DEFECTIVE 1080); structural constituent of ribosome | chr3:18152002-18153174 REVERSE	15897.6	19635.3
Brapa_ESTC000315	AT4G31300	Symbols: PBA1 | PBA1 (20S proteasome beta subunit A 1); peptidase | chr4:15188933-15190941 FORWARD	1279.27	2248.21
Brapa_ESTC000316	AT1G20850	Symbols: XCP2 | XCP2 (XYLEM CYSTEINE PEPTIDASE 2); cysteine-type peptidase/ peptidase | chr1:7252197-7253526 FORWARD	2601.36	1868.86
Brapa_ESTC000317	AT3G62030	Symbols: ROC4 | ROC4 (rotamase CyP 4); peptidyl-prolyl cis-trans isomerase | chr3:22984683-22986114 FORWARD	3329.03	18684.2
Brapa_ESTC000318	AT3G62040	| Symbols: | hydrolase | chr3:22986303-22987493 REVERSE	921.395	887.546
Brapa_ESTC000319	no_hits_f	---------	54828.3	61188.1
Brapa_ESTC000320	AT3G04400	Symbols: EMB2171 | EMB2171 (EMBRYO DEFECTIVE 2171); structural constituent of ribosome | chr3:1167345-1168314 FORWARD	14760.2	14491.6
Brapa_ESTC000321	AT1G69620	Symbols: RPL34 | RPL34 (RIBOSOMAL PROTEIN L34); structural constituent of ribosome | chr1:26193563-26194744 FORWARD	3469.22	3310.96
Brapa_ESTC000322	AT4G16660	Symbols: | heat shock protein 70, putative / HSP70, putative | chr4:9377247-9381254 FORWARD	2010.47	2938.45
Brapa_ESTC000323	AT1G74590	Symbols: ATGSTU10 | ATGSTU10 (Arabidopsis thaliana Glutathione S-transferase (class tau) 10); glutathione transferase | chr1:28027548-28028327 REVERSE	275.103	369.603
Brapa_ESTC000324	AT2G36170	Symbols: | ubiquitin extension protein 2 (UBQ2) / 60S ribosomal protein L40 (RPL40A) | chr2:15179232-15180125 FORWARD	55426.8	59708.7
Brapa_ESTC000325	AT1G72020	Symbols: | similar to OSJNBa0084A10.18 [Oryza sativa (japonica cultivar-group)] (GB:CAE03043.3); similar to Os04g0432600 [Oryza sativa (japonica cultivar-group)] (GB:NP_001052832.1) | chr1:27113183-27113989 REVERSE	1411.14	3232.01
Brapa_ESTC000326	AT1G71220	Symbols: | UDP-glucose:glycoprotein glucosyltransferase/ transferase, transferring glycosyl groups / transferase, transferring hexosyl groups | chr1:26845326-26855392 FORWARD	243.907	322.805
Brapa_ESTC000327	AT1G79790	Symbols: | haloacid dehalogenase-like hydrolase family protein | chr1:30021880-30023079 REVERSE	364.044	457.938
Brapa_ESTC000328	AT1G79780	Symbols: | similar to integral membrane family protein [Arabidopsis thaliana] (TAIR:AT3G16300.1); similar to Os05g0245300 [Oryza sativa (japonica cultivar-group)] (GB:NP_001055014.1); similar to Os01g0725400 [Oryza sativa (japonica cultivar-group)] (GB:NP_001044113.1); contains InterPro domain Protein of unknown function DUF588; (InterPro:IPR006702); contains InterPro domain Conserved hypothetica…	651.148	834.135
Brapa_ESTC000329	AT3G02700	Symbols: | NC domain-containing protein | chr3:581734-582820 REVERSE	1922.44	6156.52
Brapa_ESTC000330	AT3G02690	Symbols: | integral membrane family protein | chr3:579634-581455 FORWARD	9126.38	19803
Brapa_ESTC000331	AT4G13430	Symbols: | aconitase family protein / aconitate hydratase family protein | chr4:7804190-7807785 REVERSE	4028.66	2492.29
Brapa_ESTC000332	AT3G59920	Symbols: ATGDI2 | ATGDI2 (RAB GDP DISSOCIATION INHIBITOR 2); RAB GDP-dissociation inhibitor | chr3:22146134-22149198 FORWARD	20745.6	27987
Brapa_ESTC000333	AT2G33830	Symbols: | dormancy/auxin associated family protein | chr2:14316844-14317362 REVERSE	64052.4	62593.8
Brapa_ESTC000334	AT5G04800	Symbols: | structural constituent of ribosome | chr5:1389218-1389643 FORWARD	6806.4	5083.76
Brapa_ESTC000335	AT3G14310	Symbols: ATPME3 | ATPME3 (Arabidopsis thaliana pectin methylesterase 3) | chr3:4772221-4775102 REVERSE	324.84	673.217
Brapa_ESTC000336	AT1G14250	Symbols: | nucleoside phosphatase family protein / GDA1/CD39 family protein | chr1:4868670-4871198 FORWARD	896.718	506
Brapa_ESTC000337	AT1G11910	Symbols: | aspartyl protease family protein | chr1:4017117-4019872 REVERSE	20330.9	15227.6
Brapa_ESTC000338	AT1G47640	Symbols: | similar to Os03g0766000 [Oryza sativa (japonica cultivar-group)] (GB:NP_001051379.1); similar to expressed protein [Oryza sativa (japonica cultivar-group)] (GB:ABF99050.1); similar to unknown protein [Oryza sativa (japonica cultivar-group)] (GB:AAP50949.1); contains domain SMALL SEVEN TRANSMEMBRANE DOMAIN-CONTAINING PROTEIN (PTHR12869); contains domain gb def: F16N3.6 protein (At1g4764…	25575.2	22355.1
Brapa_ESTC000339	AT2G31610	Symbols: | 40S ribosomal protein S3 (RPS3A) | chr2:13457461-13458746 FORWARD	22200.8	8548.19
Brapa_ESTC000340	AT1G07090	Symbols: | similar to unknown protein [Arabidopsis thaliana] (TAIR:AT5G58500.1); similar to hypothetical protein [Oryza sativa (japonica cultivar-group)] (GB:BAB68109.1); contains InterPro domain Protein of unknown function DUF640; (InterPro:IPR006936) | chr1:2174201-2174791 REVERSE	5090.87	3244
Brapa_ESTC000341	AT4G14020	Symbols: | rapid alkalinization factor (RALF) family protein | chr4:8095365-8095700 REVERSE	487.966	45.8941
Brapa_ESTC000342	AT3G02470	Symbols: SAMDC | SAMDC (S-ADENOSYLMETHIONINE DECARBOXYLASE) | chr3:510230-511330 FORWARD	30247.3	13567.3
Brapa_ESTC000343	AT1G12360	Symbols: KEU | KEU (KEULE); protein transporter | chr1:4201170-4206142 FORWARD	680.059	1193.43
Brapa_ESTC000344	AT1G36730	Symbols: | eukaryotic translation initiation factor 5, putative / eIF-5, putative | chr1:13899918-13901237 REVERSE	6198.79	2177.68
Brapa_ESTC000345	AT5G14460	Symbols: | pseudouridylate synthase TruB family protein | chr5:4660242-4662546 REVERSE	993.601	1085.66
Brapa_ESTC000346	AT5G14450	Symbols: | GDSL-motif lipase/hydrolase family protein | chr5:4658491-4660037 FORWARD	1468.95	1213.45
Brapa_ESTC000347	AT3G55140	Symbols: | pectate lyase family protein | chr3:20449796-20451202 FORWARD	1773.85	1026.84
Brapa_ESTC000348	AT3G55150	Symbols: ATEXO70H1 | ATEXO70H1 (exocyst subunit EXO70 family protein H1); protein binding | chr3:20451632-20453542 REVERSE	111.981	134.793
Brapa_ESTC000349	AT3G48420	Symbols: | haloacid dehalogenase-like hydrolase family protein | chr3:17940728-17942536 FORWARD	100.577	463.764
Brapa_ESTC000350	AT5G61020	Symbols: ECT3 | ECT3 (evolutionary conserved C-terminal 3) | chr5:24574711-24577006 REVERSE	2100.96	3840.06
Brapa_ESTC000351	AT5G25760	Symbols: UBC21, PEX4 | PEX4 (PEROXIN4); ubiquitin-protein ligase | chr5:8967986-8969176 FORWARD	657.839	901.298
Brapa_ESTC000352	AT5G25770	Symbols: | similar to Os06g0163200 [Oryza sativa (japonica cultivar-group)] (GB:NP_001056894.1); similar to unknown protein [Oryza sativa (japonica cultivar-group)] (GB:BAD67646.1); contains InterPro domain Esterase/lipase/thioesterase; (InterPro:IPR000379) | chr5:8969311-8971809 REVERSE	761.639	664.735
Brapa_ESTC000353	AT1G08380	Symbols: PSAO | PSAO (photosystem I subunit O) | chr1:2641001-2641736 REVERSE	5085.51	21807.2
Brapa_ESTC000354	AT4G04020	Symbols: FIB | FIB (FIBRILLIN); structural molecule | chr4:1932159-1933544 FORWARD	2718.55	2100.51
Brapa_ESTC000355	AT5G61450	Symbols: | 2-phosphoglycerate kinase-related | chr5:24727466-24730108 REVERSE	1373.78	2126.51
Brapa_ESTC000356	AT5G47700	Symbols: | 60S acidic ribosomal protein P1 (RPP1C) | chr5:19345245-19345950 REVERSE	40575.8	28691.3
Brapa_ESTC000357	AT4G21960	Symbols: PRXR1 | PRXR1 (peroxidase 42); peroxidase | chr4:11646625-11648324 REVERSE	21361.4	11361.4
Brapa_ESTC000358	AT5G48850	Symbols: | male sterility MS5 family protein | chr5:19822802-19824925 REVERSE	95.9125	143.073
Brapa_ESTC000359	AT3G24830	Symbols: | 60S ribosomal protein L13A (RPL13aB) | chr3:9064620-9065878 FORWARD	8270.56	8539.95
Brapa_ESTC000360	AT3G11510	Symbols: | 40S ribosomal protein S14 (RPS14B) | chr3:3623763-3624872 REVERSE	27755.3	22323.9
Brapa_ESTC000361	AT2G28080	Symbols: | glycosyltransferase family protein | chr2:11967851-11970304 REVERSE	7716.45	5981.43
Brapa_ESTC000362	AT2G28080	Symbols: | glycosyltransferase family protein | chr2:11967851-11970304 REVERSE	10366.1	8182.01
Brapa_ESTC000363	AT2G46540	Symbols: | similar to fiber protein Fb11 [Gossypium barbadense] (GB:AAN77150.1) | chr2:19117759-19118753 REVERSE	3579.99	4910.72
Brapa_ESTC000364	AT4G12590	Symbols: | similar to Os09g0497400 [Oryza sativa (japonica cultivar-group)] (GB:NP_001063559.1); similar to AT4g12590-like protein [Hyacinthus orientalis] (GB:AAS20990.1); contains InterPro domain Protein of unknown function DUF850, transmembrane eukaryotic; (InterPro:IPR008568) | chr4:7451288-7452973 REVERSE	22253.4	30743
Brapa_ESTC000365	AT2G33830	Symbols: | dormancy/auxin associated family protein | chr2:14316844-14317362 REVERSE	53901.1	59676.1
Brapa_ESTC000366	AT5G36230	Symbols: | eIF4-gamma/eIF5/eIF2-epsilon domain-containing protein | chr5:14290749-14294003 FORWARD	6417.11	3446.67
Brapa_ESTC000367	AT2G38540	Symbols: LTP1, ATLTP1, LP1 | LP1 (nonspecific lipid transfer protein 1) | chr2:16137496-16137971 FORWARD	18780.9	9427.82
Brapa_ESTC000368	AT4G30580	Symbols: EMB1995, ATS2 | ATS2 (EMBRYO DEFECTIVE 1995); 1-acylglycerol-3-phosphate O-acyltransferase/ acyltransferase | chr4:14932521-14934495 REVERSE	1225.28	5474.15
Brapa_ESTC000369	AT5G60390	Symbols: | elongation factor 1-alpha / EF-1-alpha | chr5:24306452-24307901 FORWARD	14593.8	6005.19
Brapa_ESTC000370	AT3G07680	Symbols: | emp24/gp25L/p24 family protein | chr3:2455633-2456658 FORWARD	4971.49	5968.89
Brapa_ESTC000371	AT3G02470	Symbols: SAMDC | SAMDC (S-ADENOSYLMETHIONINE DECARBOXYLASE) | chr3:510230-511330 FORWARD	26901.4	17046.4
Brapa_ESTC000372	AT1G31940	Symbols: | similar to unknown protein [Arabidopsis thaliana] (TAIR:AT2G35585.1); similar to Os02g0697700 [Oryza sativa (japonica cultivar-group)] (GB:NP_001047822.1) | chr1:11470273-11471134 REVERSE	3782.2	2934.4
Brapa_ESTC000373	AT5G06150	Symbols: CYCB1;2, CYC1BAT | CYC1BAT (CYCLIN B 1;2); cyclin-dependent protein kinase regulator | chr5:1859543-1861571 REVERSE	137.29	96.9711
Brapa_ESTC000374	AT1G49600	Symbols: ATRBP47A | ATRBP47A (ARABIDOPSIS THALIANA RNA-BINDING PROTEIN 47A); RNA binding | chr1:18360904-18363818 REVERSE	1393.07	1298.99
Brapa_ESTC000375	AT4G30270	Symbols: MERI-5, BRU1, MERI5B | MERI5B (MERISTEM-5); hydrolase, acting on glycosyl bonds | chr4:14819451-14820454 REVERSE	18985.6	7024.9
Brapa_ESTC000376	AT1G23290	Symbols: RPL27AB, RPL27A | RPL27A (RIBOSOMAL PROTEIN L27A); structural constituent of ribosome | chr1:8262996-8263436 FORWARD	12744.4	13070
Brapa_ESTC000377	AT5G59890	Symbols: ADF4 | ADF4 (ACTIN DEPOLYMERIZING FACTOR 4); actin binding | chr5:24139771-24140822 FORWARD	1464.79	1678.57
Brapa_ESTC000378	AT3G42556	Symbols: | similar to unknown protein [Arabidopsis thaliana] (TAIR:AT5G51320.1); contains InterPro domain Protein of unknown function DUF321; (InterPro:IPR005529) | chr3:14687953-14688294 FORWARD	6973.81	8764.47
Brapa_ESTC000379	AT5G16310	Symbols: | ubiquitin carboxyl-terminal hydrolase family 1 protein | chr5:5342582-5344156 REVERSE	302.219	836.544
Brapa_ESTC000380	AT5G16300	Symbols: | similar to PREDICTED: similar to low density lipoprotein B isoform 1 [Bos taurus] (GB:XP_593871.2); similar to Os01g0777000 [Oryza sativa (japonica cultivar-group)] (GB:NP_001044419.1); contains domain Cullin repeat (SSF74788) | chr5:5338122-5342071 FORWARD	2606.44	5242.71
Brapa_ESTC000381	AT1G77330	Symbols: | 1-aminocyclopropane-1-carboxylate oxidase, putative / ACC oxidase, putative | chr1:29068109-29069341 REVERSE	3866.04	2178.94
Brapa_ESTC000382	AT5G09620	Symbols: | octicosapeptide/Phox/Bem1p (PB1) domain-containing protein | chr5:2983758-2985353 REVERSE	19299.8	9076.06
Brapa_ESTC000383	AT1G07890	Symbols: MEE6, CS1, APX1 | APX1 (ASCORBATE PEROXIDASE 1, MATERNAL EFFECT EMBRYO ARREST 6) | chr1:2438002-2439432 FORWARD	36539.1	21707.1
Brapa_ESTC000384	AT1G51980	Symbols: | mitochondrial processing peptidase alpha subunit, putative | chr1:19327361-19330440 REVERSE	2149.44	2272.23
Brapa_ESTC000385	AT4G29900	Symbols: ATACA10, ACA10 | ACA10 (autoinhibited Ca2+ -ATPase 10); calcium-transporting ATPase/ calmodulin binding | chr4:14611231-14618781 REVERSE	2526.9	2577.45
Brapa_ESTC000386	AT3G10410	Symbols: SCPL49 | SCPL49 (serine carboxypeptidase-like 49); serine carboxypeptidase | chr3:3235523-3238068 REVERSE	7469.2	9961.64
Brapa_ESTC000387	AT1G75760	Symbols: | ER lumen protein retaining receptor family protein | chr1:28450601-28452082 REVERSE	10346	7446.89
Brapa_ESTC000388	AT5G18380	Symbols: | 40S ribosomal protein S16 (RPS16C) | chr5:6090255-6090695 REVERSE	45024.1	45362.1
Brapa_ESTC000389	AT3G02090	Symbols: MPPBETA | MPPBETA; metalloendopeptidase | chr3:365631-368533 FORWARD	20315.4	12802.4
Brapa_ESTC000390	AT5G20010	Symbols: RAN1, ATRAN1, RAN-1 | RAN-1 (Ras-related GTP-binding nuclear protein 1); GTP binding | chr5:6760366-6761749 FORWARD	15473.3	9243.54
Brapa_ESTC000391	AT2G02010	Symbols: | glutamate decarboxylase, putative | chr2:474374-476494 REVERSE	657.052	1604.61
Brapa_ESTC000392	AT3G60770	Symbols: | 40S ribosomal protein S13 (RPS13A) | chr3:22471500-22472631 REVERSE	12809.4	12180.5
Brapa_ESTC000393	AT1G48160	Symbols: | signal recognition particle 19 kDa protein, putative / SRP19, putative | chr1:17790448-17791955 REVERSE	17788.1	19724.6
Brapa_ESTC000394	AT1G22740	Symbols: AtRABG3b, RAB7 | RAB7 (Ras-related protein 7); GTP binding | chr1:8049236-8050483 FORWARD	10855.3	7756.33
Brapa_ESTC000395	AT2G23960	Symbols: | defense-related protein, putative | chr2:10203139-10204690 FORWARD	51.7303	61.6979
Brapa_ESTC000396	AT1G77080	Symbols: FLM, AGL27, MAF1 | MAF1 (MADS AFFECTING FLOWERING 1); transcription factor | chr1:28960573-28964739 FORWARD	4849.39	7421.52
Brapa_ESTC000397	AT5G58990	Symbols: | similar to unknown protein [Arabidopsis thaliana] (TAIR:AT5G52370.1); similar to hypothetical protein MtrDRAFT_AC146330g18v1 [Medicago truncatula] (GB:ABE90880.1); contains InterPro domain Translation protein SH3-like; (InterPro:IPR008991) | chr5:23832254-23833045 FORWARD	4421.02	5303.59
Brapa_ESTC000398	AT5G59010	Symbols: | ATP binding / binding / protein kinase | chr5:23837804-23839725 REVERSE	7273.97	16041.2
Brapa_ESTC000399	AT5G05460	Symbols: | hydrolase, acting on glycosyl bonds | chr5:1615616-1618772 FORWARD	2310.7	3157.21
Brapa_ESTC000400	AT5G05480	Symbols: | similar to unknown protein [Arabidopsis thaliana] (TAIR:AT3G14920.1); similar to Os05g0395000 [Oryza sativa (japonica cultivar-group)] (GB:NP_001055461.1); similar to Peptide-N4-(N-acetyl-beta-glucosaminyl)aspara (GB:P81898) | chr5:1622339-1624165 REVERSE	640.966	533.611
Brapa_ESTC000401	AT5G39320	Symbols: | UDP-glucose 6-dehydrogenase, putative | chr5:15760482-15761924 FORWARD	5138.27	2769.88
Brapa_ESTC000402	AT5G48800	Symbols: | phototropic-responsive NPH3 family protein | chr5:19804107-19806229 FORWARD	1385	944.673
Brapa_ESTC000403	no_hits_f	---------	12050.2	14355.1
Brapa_ESTC000405	AT2G46490	Symbols: | similar to unknown protein [Arabidopsis thaliana] (TAIR:AT5G35110.1) | chr2:19086529-19086933 FORWARD	3351.19	3615.03
Brapa_ESTC000406	AT1G27730	Symbols: ZAT10, STZ | STZ (SALT TOLERANCE ZINC FINGER); nucleic acid binding / transcription factor/ zinc ion binding | chr1:9648289-9648972 REVERSE	5557.78	4498.93
Brapa_ESTC000407	AT3G27060	Symbols: TSO2 | TSO2 (TSO2); ribonucleoside-diphosphate reductase | chr3:9981208-9982294 REVERSE	1546.84	1329.77
Brapa_ESTC000408	AT5G60670	Symbols: | 60S ribosomal protein L12 (RPL12C) | chr5:24398292-24398792 REVERSE	294.646	234.416
Brapa_ESTC000409	AT5G53300	Symbols: UBC10 | UBC10 (ubiquitin-conjugating enzyme 10); ubiquitin-protein ligase | chr5:21650028-21651215 REVERSE	16305.8	19790.9
Brapa_ESTC000410	AT2G43540	Symbols: | similar to conserved hypothetical protein [Medicago truncatula] (GB:ABE91484.1) | chr2:18079462-18079971 FORWARD	734.063	644.618
Brapa_ESTC000411	AT5G46160	Symbols: | ribosomal protein L14 family protein / huellenlos paralog (HLP) | chr5:18728683-18729568 REVERSE	2124.09	3767.35
Brapa_ESTC000412	AT1G35190	Symbols: | oxidoreductase, 2OG-Fe(II) oxygenase family protein | chr1:12890522-12892610 FORWARD	183.803	131.104
Brapa_ESTC000413	AT5G19050	Symbols: | similar to unnamed protein product [Kluyveromyces lactis] (GB:XP_455602.1); similar to Os07g0211800 [Oryza sativa (japonica cultivar-group)] (GB:NP_001059175.1); contains InterPro domain Esterase/lipase/thioesterase; (InterPro:IPR000379); contains InterPro domain Protein of unknown function DUF1749; (InterPro:IPR013744) | chr5:6369309-6371728 FORWARD	687.194	1453.19
Brapa_ESTC000414	AT4G24570	Symbols: | mitochondrial substrate carrier family protein | chr4:12686556-12687497 FORWARD	1588.11	852.013
Brapa_ESTC000415	no_hits_f	---------	52607.5	61956.6
Brapa_ESTC000416	AT5G54680	Symbols: ILR3 | ILR3 (IAA-LEUCINE RESISTANT3); DNA binding / transcription factor | chr5:22234496-22236219 FORWARD	1886.78	605.829
Brapa_ESTC000417	AT2G44670	Symbols: | senescence-associated protein-related | chr2:18432354-18432748 FORWARD	812.406	3262.41
Brapa_ESTC000418	AT5G47370	Symbols: HAT2 | HAT2; transcription factor | chr5:19233709-19234874 REVERSE	5527.1	4962.88
Brapa_ESTC000419	AT2G40890	Symbols: CYP98A3, REF8 | CYP98A3 (cytochrome P450, family 98, subfamily A, polypeptide 3); p-coumarate 3-hydroxylase | chr2:17065369-17067610 REVERSE	75.1507	7.0461
Brapa_ESTC000420	AT1G13110	Symbols: CYP71B7 | CYP71B7 (cytochrome P450, family 71, subfamily B, polypeptide 7); oxygen binding | chr1:4467270-4468855 FORWARD	2633.14	2176.61
Brapa_ESTC000421	no_hits_f	---------	2423.88	3751.59
Brapa_ESTC000422	no_hits_f	---------	35729.4	46111.8
Brapa_ESTC000423	AT3G14120	Symbols: | similar to Nuclear pore complex, rNup107 component (sc Nup84) (ISS) [Ostreococcus tauri] (GB:CAL50524.1); similar to Os11g0643700 [Oryza sativa (japonica cultivar-group)] (GB:NP_001068360.1); contains InterPro domain Nuclear pore protein 84/107; (InterPro:IPR007252) | chr3:4678000-4685462 FORWARD	2498.42	1782.52
Brapa_ESTC000424	AT3G14130	Symbols: | (S)-2-hydroxy-acid oxidase, peroxisomal, putative / glycolate oxidase, putative / short chain alpha-hydroxy acid oxidase, putative | chr3:4685851-4687859 REVERSE	944.494	1256.14
Brapa_ESTC000425	AT1G65930	Symbols: | isocitrate dehydrogenase, putative / NADP+ isocitrate dehydrogenase, putative | chr1:24542751-24545524 FORWARD	17221.4	15735.5
Brapa_ESTC000426	AT2G42940	Symbols: | DNA-binding family protein | chr2:17869574-17870347 REVERSE	449.089	361.683
Brapa_ESTC000427	AT1G78020	Symbols: | senescence-associated protein-related | chr1:29343681-29344385 FORWARD	3434.29	3503.32
Brapa_ESTC000428	AT2G30320	Symbols: | tRNA pseudouridine synthase family protein | chr2:12932805-12934973 REVERSE	6566.05	7766.88
Brapa_ESTC000429	AT1G19570	Symbols: DHAR1 | DHAR1 (DEHYDROASCORBATE REDUCTASE); glutathione dehydrogenase (ascorbate) | chr1:6773453-6774404 REVERSE	1894.35	3408.78
Brapa_ESTC000430	AT1G19540	Symbols: | isoflavone reductase, putative | chr1:6765704-6767238 FORWARD	2078.46	1033.85
Brapa_ESTC000431	AT3G21640	Symbols: UCU2, FKBP42, TWD1 | TWD1 (TWISTED DWARF 1); FK506 binding / peptidyl-prolyl cis-trans isomerase | chr3:7619032-7621104 REVERSE	3496.62	4304.21
Brapa_ESTC000432	AT3G52070	Symbols: | similar to hypothetical protein MtrDRAFT_AC136506g13v1 [Medicago truncatula] (GB:ABE82322.1) | chr3:19323731-19324238 FORWARD	6433.19	2659.03
Brapa_ESTC000433	AT5G07470	Symbols: PMSR3 | PMSR3 (PEPTIDEMETHIONINE SULFOXIDE REDUCTASE 3); protein-methionine-S-oxide reductase | chr5:2362761-2364287 REVERSE	225.758	188.193
Brapa_ESTC000434	AT5G08280	Symbols: HEMC | HEMC (HYDROXYMETHYLBILANE SYNTHASE); hydroxymethylbilane synthase | chr5:2663764-2665597 REVERSE	3786.08	3882.8
Brapa_ESTC000435	AT4G22820	Symbols: | zinc finger (AN1-like) family protein | chr4:11987882-11988412 REVERSE	20745.7	12669.5
Brapa_ESTC000436	AT2G43000	Symbols: ANAC042 | ANAC042 (Arabidopsis NAC domain containing protein 42); transcription factor | chr2:17887694-17889661 REVERSE	245.197	212.343
Brapa_ESTC000439	AT1G30230	Symbols: | elongation factor 1-beta / EF-1-beta | chr1:10639270-10640585 FORWARD	21809	21983.3
Brapa_ESTC000440	AT1G30230	Symbols: | elongation factor 1-beta / EF-1-beta | chr1:10639270-10640585 FORWARD	7468	7749.8
Brapa_ESTC000441	AT1G70670	Symbols: | caleosin-related family protein | chr1:26648493-26649633 FORWARD	1260.72	1679.7
Brapa_ESTC000442	AT1G65930	Symbols: | isocitrate dehydrogenase, putative / NADP+ isocitrate dehydrogenase, putative | chr1:24542751-24545524 FORWARD	18979.8	22239.3
Brapa_ESTC000443	AT3G23390	Symbols: | 60S ribosomal protein L36a/L44 (RPL36aA) | chr3:8375434-8376231 FORWARD	33142.2	44192.5
Brapa_ESTC000444	AT2G30790	Symbols: PSBP-2 | PSBP-2 (photosystem II subunit P-2); calcium ion binding | chr2:13126124-13127167 REVERSE	803.595	687.042
Brapa_ESTC000445	AT1G35720	Symbols: OXY5, ATOXY5, ANNAT1 | ANNAT1 (ANNEXIN ARABIDOPSIS 1); calcium ion binding / calcium-dependent phospholipid binding | chr1:13226516-13228151 FORWARD	31873.8	28343.6
Brapa_ESTC000446	AT4G25100	Symbols: FSD1 | FSD1 (FE SUPEROXIDE DISMUTASE 1); iron superoxide dismutase | chr4:12884659-12886511 REVERSE	856.661	847.823
Brapa_ESTC000447	AT2G01520	Symbols: MLP328 | major latex protein-related / MLP-related | chr2:235991-236880 FORWARD	88.414	146.432
Brapa_ESTC000448	AT2G05100	Symbols: LHCB2.3, LHCB2.1 | LHCB2.1 (Photosystem II light harvesting complex gene 2.1); chlorophyll binding | chr2:1823446-1824328 REVERSE	4468.58	7039.53
Brapa_ESTC000449	AT5G39600	Symbols: | similar to hypothetical protein [Prunus persica] (GB:AAO14625.1) | chr5:15871416-15871999 REVERSE	4125.64	4215.72
Brapa_ESTC000450	AT1G49240	Symbols: ACT8 | ACT8 (ACTIN 8); structural constituent of cytoskeleton | chr1:18220207-18221615 FORWARD	27732	9634.86
Brapa_ESTC000451	AT2G38530	Symbols: LP2, LTP2 | LTP2 (LIPID TRANSFER PROTEIN 2); lipid binding | chr2:16135559-16136026 FORWARD	38048.7	26334.9
Brapa_ESTC000452	AT4G13940	Symbols: EMB1395, MEE58, SAHH, SAHH1, HOG1 | HOG1 (HOMOLOGY-DEPENDENT GENE SILENCING 1) | chr4:8054926-8056758 FORWARD	20441.1	4055.59
Brapa_ESTC000453	AT5G16150	Symbols: PGLCT, GLT1 | GLT1/PGLCT (GLUCOSE TRANSPORTER 1); carbohydrate transporter/ sugar porter | chr5:5272907-5275681 FORWARD	4655.14	5158.86
Brapa_ESTC000454	AT4G09320	Symbols: NDPK1 | NDPK1 (nucleoside diphosphate kinase 1); ATP binding / nucleoside diphosphate kinase | chr4:5923421-5924363 FORWARD	20295.1	22952.3
Brapa_ESTC000455	AT5G58240	Symbols: | bis(5'-adenosyl)-triphosphatase, putative | chr5:23575575-23576539 REVERSE	180.419	994.873
Brapa_ESTC000456	AT2G01570	Symbols: RGA, RGA1 | RGA1 (REPRESSOR OF GA1-3 1); transcription factor | chr2:255580-257343 REVERSE	30147	15303.9
Brapa_ESTC000457	AT3G08770	Symbols: LTP6 | LTP6 (Lipid transfer protein 6); lipid binding | chr3:2664355-2664790 REVERSE	6827.06	12615.3
Brapa_ESTC000458	AT2G01140	Symbols: | fructose-bisphosphate aldolase, putative | chr2:95005-96490 REVERSE	20192.5	5895.68
Brapa_ESTC000459	AT2G03980	Symbols: | GDSL-motif lipase/hydrolase family protein | chr2:1260904-1262405 FORWARD	293.872	254.457
Brapa_ESTC000460	no_hits_f	---------	333.078	329.34
Brapa_ESTC000461	AT2G26660	Symbols: | SPX (SYG1/Pho81/XPR1) domain-containing protein | chr2:11346010-11347781 FORWARD	9895.98	6884.71
Brapa_ESTC000462	AT4G13940	Symbols: EMB1395, MEE58, SAHH, SAHH1, HOG1 | HOG1 (HOMOLOGY-DEPENDENT GENE SILENCING 1); adenosylhomocysteinase | chr4:8054926-8056671 FORWARD	9340.46	2947.11
Brapa_ESTC000463	AT1G13880	Symbols: | ELM2 domain-containing protein | chr1:4749600-4750964 FORWARD	2881.98	3050.8
Brapa_ESTC000464	AT5G17920	Symbols: ATMETS, ATMS1, ATCIMS | ATCIMS (COBALAMIN-INDEPENDENT METHIONINE SYNTHASE) | chr5:5935773-5939197 FORWARD	19219.8	10853.2
Brapa_ESTC000465	AT3G16500	Symbols: IAA26, PAP1 | PAP1 (PHYTOCHROME-ASSOCIATED PROTEIN 1); transcription factor | chr3:5612807-5614214 REVERSE	11954.3	8711.68
Brapa_ESTC000466	AT4G05050	Symbols: UBQ11 | UBQ11 (UBIQUITIN 11); protein binding | chr4:2588269-2588958 REVERSE	52362.5	48418.4
Brapa_ESTC000467	AT4G02060	Symbols: MCM7, PRL | PRL (PROLIFERA); ATP binding / DNA binding / DNA-dependent ATPase | chr4:901484-905297 FORWARD	372.243	664.87
Brapa_ESTC000468	AT4G35100	Symbols: PIP3A, PIP2;7, SIMIP, PIP3 | PIP3 (PLASMA MEMBRANE INTRINSIC PROTEIN 3); water channel | chr4:16708677-16709963 FORWARD	26724.1	35526.5
Brapa_ESTC000469	AT1G07920	Symbols: | elongation factor 1-alpha / EF-1-alpha | chr1:2455556-2456998 FORWARD	10851.5	8748.35
Brapa_ESTC000470	AT1G59600	| Symbols: ZCW7 | ZCW7 | chr1:21893592-21895575 REVERSE	2924.72	5106.44
Brapa_ESTC000471	AT1G53240	Symbols: | malate dehydrogenase (NAD), mitochondrial | chr1:19858634-19860470 REVERSE	9298.25	6002.06
Brapa_ESTC000472	AT5G62440	Symbols: | similar to defective chloroplasts and leaves protein-related / DCL protein-related [Arabidopsis thaliana] (TAIR:AT1G45230.1); similar to expressed protein [Oryza sativa (japonica cultivar-group)] (GB:ABF94367.1); similar to Os03g0187000 [Oryza sativa (japonica cultivar-group)] (GB:NP_001049206.1) | chr5:25089846-25091143 REVERSE	8805.99	8837.25
Brapa_ESTC000473	no_hits_f	---------	711.736	578.604
Brapa_ESTC000474	no_hits_f	---------	496.806	1086.51
Brapa_ESTC000475	AT5G22060	Symbols: ATJ2 | ATJ2 (Arabidopsis thaliana DnaJ homologue 2) | chr5:7303801-7305671 REVERSE	11731.9	4667.84
Brapa_ESTC000476	no_hits_f	---------	160.303	129.622
Brapa_ESTC000477	AT2G44490	Symbols: PEN2 | PEN2 (PENETRATION 2); hydrolase, hydrolyzing O-glycosyl compounds | chr2:18371948-18374591 FORWARD	6177.21	9310.8
Brapa_ESTC000478	AT3G21720	Symbols: | isocitrate lyase, putative | chr3:7652796-7655880 REVERSE	1533.92	1500.92
Brapa_ESTC000479	AT2G20670	Symbols: | similar to unknown protein [Arabidopsis thaliana] (TAIR:AT4G32480.1); similar to Protein of unknown function DUF506, plant [Medicago truncatula] (GB:ABD32359.1); contains InterPro domain Protein of unknown function DUF506, plant; (InterPro:IPR006502) | chr2:8919244-8920553 REVERSE	3663.57	1164.69
Brapa_ESTC000480	AT2G26230	Symbols: | uricase / urate oxidase / nodulin 35, putative | chr2:11172034-11174046 FORWARD	24855.1	29916.2
Brapa_ESTC000481	AT5G16570	Symbols: GLN1;4 | GLN1;4 (Glutamine synthetase 1;4); glutamate-ammonia ligase | chr5:5421901-5424526 REVERSE	2086.36	6156.84
Brapa_ESTC000482	AT1G64680	Symbols: | similar to unknown protein [Arabidopsis thaliana] (TAIR:AT1G03055.1); similar to hypothetical protein LOC_Os11g37650 [Oryza sativa (japonica cultivar-group)] (GB:ABA94460.1); similar to Os08g0114100 [Oryza sativa (japonica cultivar-group)] (GB:NP_001060847.1) | chr1:24039734-24040725 FORWARD	4204.48	5013.27
Brapa_ESTC000483	AT1G21640	Symbols: ATNADK-2, NADK2 | NADK2 (NAD kinase 2); NAD+ kinase/ calmodulin binding | chr1:7588715-7592658 FORWARD	183.142	128.506
Brapa_ESTC000484	AT1G70530	Symbols: | protein kinase family protein | chr1:26592413-26595042 REVERSE	2609.01	806.455
Brapa_ESTC000485	AT4G30680	Symbols: | MA3 domain-containing protein | chr4:14958693-14960018 REVERSE	302.12	85.4665
Brapa_ESTC000486	AT3G13200	Symbols: | Cwf15 / Cwc15 cell cycle control family protein | chr3:4242246-4243983 FORWARD	20666.5	17758.9
Brapa_ESTC000487	AT3G12120	Symbols: FAD2 | FAD2 (FATTY ACID DESATURASE 2) | chr3:3860598-3861749 REVERSE	53707.4	24068
Brapa_ESTC000488	AT2G31610	Symbols: | 40S ribosomal protein S3 (RPS3A) | chr2:13457461-13458746 FORWARD	25991.4	25100
Brapa_ESTC000489	AT2G21250	Symbols: | mannose 6-phosphate reductase (NADPH-dependent), putative | chr2:9110489-9112197 REVERSE	3878.1	7538.28
Brapa_ESTC000490	AT2G21260	Symbols: | mannose 6-phosphate reductase (NADPH-dependent), putative | chr2:9112774-9114389 REVERSE	3246.01	9031.79
Brapa_ESTC000491	AT1G79040	Symbols: PSBR | PSBR (photosystem II subunit R) | chr1:29740978-29741674 FORWARD	14186.6	27204.7
Brapa_ESTC000492	AT2G32260	Symbols: | cholinephosphate cytidylyltransferase, putative / phosphorylcholine transferase, putative / CTP:phosphocholine cytidylyltransferase, putative | chr2:13704722-13707318 FORWARD	3277.98	617.15
Brapa_ESTC000494	AT2G46260	Symbols: | BTB/POZ domain-containing protein | chr2:19003184-19005536 FORWARD	2728.76	863.226
Brapa_ESTC000495	AT5G16710	Symbols: DHAR3 | DHAR3 (DEHYDROASCORBATE REDUCTASE 1); glutathione dehydrogenase (ascorbate) | chr5:5483315-5484929 FORWARD	2158.41	8862.53
Brapa_ESTC000496	AT1G67090	Symbols: RBCS1A | ribulose bisphosphate carboxylase small chain 1A / RuBisCO small subunit 1A (RBCS-1A) (ATS1A) | chr1:25052128-25052912 REVERSE	46968	60329.2
Brapa_ESTC000497	AT2G36830	Symbols: TIP1;1, GAMMA-TIP1, GAMMA-TIP | GAMMA-TIP (Tonoplast intrinsic protein (TIP) gamma); water channel | chr2:15452569-15453415 FORWARD	22000.7	19493.1
Brapa_ESTC000498	AT5G17920	Symbols: ATMETS, ATMS1, ATCIMS | ATCIMS (COBALAMIN-INDEPENDENT METHIONINE SYNTHASE) | chr5:5935773-5939197 FORWARD	27875.2	10049.5
Brapa_ESTC000499	no_hits_f	---------	52826.6	60638.7
Brapa_ESTC000500	AT2G31570	Symbols: ATGPX2 | ATGPX2 (GLUTATHIONE PEROXIDASE 2); glutathione peroxidase | chr2:13445288-13446852 REVERSE	318.471	1975.65
Brapa_ESTC000501	AT5G44730	Symbols: | haloacid dehalogenase-like hydrolase family protein | chr5:18062815-18063746 REVERSE	14491.6	6511.41
Brapa_ESTC000502	AT5G20830	Symbols: SUS1, ASUS1, ATSUS1 | SUS1 (SUCROSE SYNTHASE 1); UDP-glycosyltransferase/ sucrose synthase | chr5:7050601-7054034 REVERSE	18774.4	4901.99
Brapa_ESTC000503	AT1G04430	Symbols: | dehydration-responsive protein-related | chr1:1198859-1201300 FORWARD	28804.4	18915.9
Brapa_ESTC000504	AT1G71697	Symbols: CK, ATCK1 | ATCK1 (CHOLINE KINASE) | chr1:26975199-26976839 FORWARD	11953.9	5441.56
Brapa_ESTC000505	AT2G31200	Symbols: ADF6 | ADF6 (ACTIN DEPOLYMERIZING FACTOR 6); actin binding | chr2:13301248-13302025 FORWARD	4247.31	3481.92
Brapa_ESTC000506	AT2G20190	Symbols: | CLIP-associating protein (CLASP) -related | chr2:8718943-8725894 REVERSE	2824.7	837.502
Brapa_ESTC000507	AT5G28050	Symbols: | hydrolase/ zinc ion binding | chr5:10044213-10045488 REVERSE	14195.5	8777.28
Brapa_ESTC000508	AT5G64040	Symbols: PSAN | PSAN (photosystem I reaction center subunit PSI-N); calmodulin binding | chr5:25645950-25646635 REVERSE	31031.4	54885.4
Brapa_ESTC000509	AT2G06520	Symbols: PSBX | PSBX (photosystem II subunit X) | chr2:2587865-2588215 REVERSE	3794.83	21548.4
Brapa_ESTC000511	AT3G08520	Symbols: | 60S ribosomal protein L41 (RPL41D) | chr3:2586038-2586212 FORWARD	39629.3	47299.1
Brapa_ESTC000512	AT5G06870	Symbols: PGIP2 | PGIP2 (POLYGALACTURONASE INHIBITING PROTEIN 2); protein binding | chr5:2133942-2135017 FORWARD	111.98	152.18
Brapa_ESTC000513	AT2G02510	Symbols: | similar to unknown protein [Arabidopsis thaliana] (TAIR:AT1G14450.1); similar to unknown protein [Oryza sativa (japonica cultivar-group)] (GB:BAD15588.1) | chr2:673337-673555 FORWARD	3326.88	6976.31
Brapa_ESTC000515	AT2G31980	Symbols: | cysteine proteinase inhibitor-related | chr2:13616323-13616847 REVERSE	8.4432	13.0999
Brapa_ESTC000516	AT4G21090	| Symbols: | electron carrier | chr4:11256674-11258280 REVERSE	1854.94	3365.97
Brapa_ESTC000517	AT1G69620	Symbols: RPL34 | RPL34 (RIBOSOMAL PROTEIN L34); structural constituent of ribosome | chr1:26193563-26194744 FORWARD	4968.25	6774.12
Brapa_ESTC000518	no_hits_f	---------	130.818	186.039
Brapa_ESTC000519	no_hits_f	---------	21.4684	24.3504
Brapa_ESTC000520	AT1G56580	Symbols: | similar to unknown protein [Arabidopsis thaliana] (TAIR:AT1G09310.1); similar to Os12g0563600 [Oryza sativa (japonica cultivar-group)] (GB:NP_001067038.1); similar to Os11g0683600 [Oryza sativa (japonica cultivar-group)] (GB:NP_001068462.1); similar to hypothetical protein [Oryza sativa (japonica cultivar-group)] (GB:BAC15899.1); contains InterPro domain Protein of unknown function DUF…	22096.2	20957.1
Brapa_ESTC000521	AT3G08770	Symbols: LTP6 | LTP6 (Lipid transfer protein 6); lipid binding | chr3:2664355-2664790 REVERSE	15310.7	23157.3
Brapa_ESTC000522	AT1G54410	Symbols: | dehydrin family protein | chr1:20313972-20314268 REVERSE	56593.5	58390.4
Brapa_ESTC000523	AT4G15630	Symbols: | integral membrane family protein | chr4:8917525-8918681 FORWARD	717.419	560.313
Brapa_ESTC000524	AT2G36170	Symbols: | ubiquitin extension protein 2 (UBQ2) / 60S ribosomal protein L40 (RPL40A) | chr2:15179232-15180125 FORWARD	57254	55978
Brapa_ESTC000525	AT1G79040	Symbols: PSBR | PSBR (photosystem II subunit R) | chr1:29740978-29741674 FORWARD	13513.1	28494.4
Brapa_ESTC000526	AT2G05990	Symbols: ENR1, MOD1 | MOD1 (MOSAIC DEATH 1); enoyl-[acyl-carrier-protein] reductase (NADH)/ oxidoreductase | chr2:2322873-2324864 FORWARD	2465.29	2672.63
Brapa_ESTC000527	AT3G46560	Symbols: EMB2474, TIM9 | TIM9 (EMBRYO DEFECTIVE 2474); protein translocase | chr3:17149617-17150286 FORWARD	283.107	377.141
Brapa_ESTC000528	AT4G25225	Symbols: | similar to unknown protein [Arabidopsis thaliana] (TAIR:AT2G35736.1); similar to Os05g0118800 [Oryza sativa (japonica cultivar-group)] (GB:NP_001054478.1); similar to Os07g0239500 [Oryza sativa (japonica cultivar-group)] (GB:NP_001059260.1); similar to Os02g0279800 [Oryza sativa (japonica cultivar-group)] (GB:NP_001046552.1) | chr4:12923096-12923266 REVERSE	6353.37	5889.17
Brapa_ESTC000529	AT4G00040	Symbols: | chalcone and stilbene synthase family protein | chr4:14653-15897 FORWARD	322.033	593.09
Brapa_ESTC000531	AT3G45030	Symbols: | 40S ribosomal protein S20 (RPS20A) | chr3:16482591-16483297 REVERSE	6238.88	5135.74
Brapa_ESTC000532	AT1G28150	Symbols: | similar to Os04g0528100 [Oryza sativa (japonica cultivar-group)] (GB:NP_001053373.1) | chr1:9835109-9835829 REVERSE	2043.1	2519.95
Brapa_ESTC000533	AT5G06730	| Symbols: | peroxidase, putative | chr5:2080208-2081622 REVERSE	124.634	44.1271
Brapa_ESTC000534	AT4G33355	| Symbols: | lipid binding | chr4:16067101-16067572 FORWARD	202.398	303.288
Brapa_ESTC000535	no_hits_f	---------	49.0348	50.4365
Brapa_ESTC000536	AT1G67785	Symbols: | similar to Os01g0908400 [Oryza sativa (japonica cultivar-group)] (GB:NP_001045143.1); contains domain PH domain-like (SSF50729) | chr1:25419763-25420647 REVERSE	1412.74	2749.46
Brapa_ESTC000537	AT1G25275	| Symbols: | unknown protein | chr1:8860706-8861143 FORWARD	672.135	1860.31
Brapa_ESTC000538	AT1G23410	Symbols: | ubiquitin extension protein, putative / 40S ribosomal protein S27A (RPS27aA) | chr1:8314929-8315399 FORWARD	19080.1	25057.6
Brapa_ESTC000539	no_hits_f	---------	56.6667	73.3528
Brapa_ESTC000540	no_hits_f	---------	36607.8	46270.1
Brapa_ESTC000541	AT2G30570	Symbols: PSBW | photosystem II reaction center W (PsbW) protein-related | chr2:13026403-13027130 REVERSE	7921.74	9861.41
Brapa_ESTC000542	AT3G52590	Symbols: EMB2167, ERD16, UBQ1 | UBQ1 (EARLY-RESPONSIVE TO DEHYDRATION 16, UBIQUITIN EXTENSION PROTEIN 1); protein binding | chr3:19516646-19517659 FORWARD	27235.5	28136.4
Brapa_ESTC000543	AT5G54770	Symbols: TZ, THI1 | THI1 (THIAZOLE REQUIRING) | chr5:22263860-22265117 FORWARD	11448.6	15973.8
Brapa_ESTC000544	no_hits_f	---------	23286.5	18883
Brapa_ESTC000545	AT1G13930	Symbols: | similar to nodulin-related [Arabidopsis thaliana] (TAIR:AT2G03440.1); similar to drought-induced protein SDi-6 - common sunflower (fragment) (GB:S71562) | chr1:4761088-4761555 FORWARD	5027.7	2028.74
Brapa_ESTC000546	AT1G10430	Symbols: PP2A-2 | PP2A-2 (protein phosphatase 2a-2); protein phosphatase type 2A | chr1:3428706-3430438 REVERSE	6992.02	11889.4
Brapa_ESTC000547	AT3G14430	Symbols: | similar to hypothetical protein [Oryza sativa (japonica cultivar-group)] (GB:BAD09102.1) | chr3:4824406-4824739 REVERSE	15.0268	9.0252
Brapa_ESTC000548	no_hits_f	---------	8155.95	13088.4
Brapa_ESTC000550	AT2G45130	Symbols: | SPX (SYG1/Pho81/XPR1) domain-containing protein | chr2:18613564-18614829 FORWARD	1830.87	1810.62
Brapa_ESTC000551	AT5G54750	Symbols: | transport protein particle (TRAPP) component Bet3, putative | chr5:22259306-22260703 FORWARD	21302.4	23938.1
Brapa_ESTC000552	AT3G07830	Symbols: | polygalacturonase, putative / pectinase, putative | chr3:2499460-2500972 REVERSE	7.6745	9.3084
Brapa_ESTC000553	AT1G71730	Symbols: | similar to late embryogenesis abundant protein [Picea glauca] (GB:AAB01563.1) | chr1:26989960-26990493 REVERSE	135.503	310.209
Brapa_ESTC000554	AT1G22990	Symbols: | heavy-metal-associated domain-containing protein / copper chaperone (CCH)-related | chr1:8139210-8140034 FORWARD	19.9356	27.2725
Brapa_ESTC000555	AT5G24690	Symbols: | similar to unknown protein [Arabidopsis thaliana] (TAIR:AT5G22790.1); similar to conserved hypothetical protein [Medicago truncatula] (GB:ABE84237.1) | chr5:8455786-8458516 REVERSE	7556.78	4696.61
Brapa_ESTC000556	AT4G34710	Symbols: SPE2, ADC2 | ADC2 (ARGININE DECARBOXYLASE 2) | chr4:16560320-16562455 REVERSE	27.6028	28.0556
Brapa_ESTC000557	AT2G35240	Symbols: | plastid developmental protein DAG, putative | chr2:14852178-14853341 REVERSE	9350.89	5997.9
Brapa_ESTC000558	AT2G35680	Symbols: | dual specificity protein phosphatase family protein | chr2:15004083-15005669 REVERSE	8736.46	6369.1
Brapa_ESTC000559	AT1G09310	Symbols: | similar to unknown protein [Arabidopsis thaliana] (TAIR:AT1G56580.1); similar to Os12g0563600 [Oryza sativa (japonica cultivar-group)] (GB:NP_001067038.1); similar to hypothetical protein [Oryza sativa (japonica cultivar-group)] (GB:BAC10818.1); similar to Os11g0683600 [Oryza sativa (japonica cultivar-group)] (GB:NP_001068462.1); contains InterPro domain Protein of unknown function DUF…	4519.6	2191.42
Brapa_ESTC000560	ATCG00530	Symbols: YCF10 | Identical to Chloroplast envelope membrane protein (cemA) [Arabidopsis Thaliana] (GB:P56783); similar to proton extrusion protein-related [Arabidopsis thaliana] (TAIR:AT4G31040.1); similar to chloroplast envelope membrane protein [Gossypium hirsutum] (GB:YP_538947.1); contains InterPro domain CemA; (InterPro:IPR004282) | chrC:60741-61430 FORWARD	20013.2	30767.5
Brapa_ESTC000561	AT5G42740	Symbols: | glucose-6-phosphate isomerase, cytosolic (PGIC) | chr5:17153308-17157850 FORWARD	845.604	1085.93
Brapa_ESTC000562	AT2G41410	| Symbols: | calmodulin, putative | chr2:17269163-17269813 REVERSE	15694	16835
Brapa_ESTC000563	AT5G06060	Symbols: | tropinone reductase, putative / tropine dehydrogenase, putative | chr5:1824067-1825834 REVERSE	1060.35	1525.82
Brapa_ESTC000564	AT1G22360	| Symbols: | UDP-glycosyltransferase | chr1:7895057-7897516 REVERSE	160.949	138.474
Brapa_ESTC000565	AT2G34250	| Symbols: | protein translocase | chr2:14469714-14471651 FORWARD	333.731	358.041
Brapa_ESTC000566	AT3G57890	Symbols: | tubulin-specific chaperone C-related | chr3:21449248-21452672 FORWARD	2796.01	569.508
Brapa_ESTC000567	AT3G02470	Symbols: SAMDC | SAMDC (S-ADENOSYLMETHIONINE DECARBOXYLASE) | chr3:510230-511330 FORWARD	4460.68	4842.21
Brapa_ESTC000568	AT1G19170	Symbols: | glycoside hydrolase family 28 protein / polygalacturonase (pectinase) family protein | chr1:6616768-6618866 FORWARD	1932.16	1082.39
Brapa_ESTC000569	AT3G54500	Symbols: | similar to dentin sialophosphoprotein-related [Arabidopsis thaliana] (TAIR:AT5G64170.2); similar to conserved hypothetical protein [Medicago truncatula] (GB:ABD28297.1) | chr3:20186770-20189253 REVERSE	6075.23	14534.6
Brapa_ESTC000570	AT5G42380	Symbols: | calmodulin-related protein, putative | chr5:16959986-16960543 REVERSE	74.3031	104.883
Brapa_ESTC000571	AT1G30580	| Symbols: | GTP binding | chr1:10831935-10835436 REVERSE	2997	2731.15
Brapa_ESTC000572	AT5G43430	Symbols: ETFBETA | ETFBETA; electron carrier | chr5:17471059-17472339 FORWARD	2348.16	2852.67
Brapa_ESTC000573	AT1G04410	Symbols: | malate dehydrogenase, cytosolic, putative | chr1:1189417-1191266 REVERSE	15149.4	10235.5
Brapa_ESTC000574	AT2G43750	Symbols: ACS1, CPACS1, ATCS-B, OASB | OASB (CYSTEINE SYNTHASE 1); cysteine synthase | chr2:18136681-18139399 REVERSE	2259.39	721.755
Brapa_ESTC000575	AT5G54160	Symbols: OMT1, ATOMT1 | ATOMT1 (O-METHYLTRANSFERASE 1) | chr5:21999301-22001393 FORWARD	631.031	149.225
Brapa_ESTC000576	AT1G16190	Symbols: | DNA repair protein RAD23, putative | chr1:5543261-5545886 FORWARD	914.607	386.046
Brapa_ESTC000577	AT5G67370	Symbols: | similar to unknown protein [Arabidopsis thaliana] (TAIR:AT5G11840.1); similar to Protein of unknown function DUF1230 [Medicago truncatula] (GB:ABE85761.1); contains InterPro domain Protein of unknown function DUF1230; (InterPro:IPR009631) | chr5:26894893-26896691 REVERSE	2647.18	14446.9
Brapa_ESTC000578	AT3G44880	Symbols: LLS1, ACD1 | ACD1 (ACCELERATED CELL DEATH 1, PHEOPHORBIDE A OXYGENASE) | chr3:16394843-16397189 FORWARD	335.442	81.9992
Brapa_ESTC000579	AT2G17760	Symbols: | aspartyl protease family protein | chr2:7720570-7723351 FORWARD	1851.07	2318.28
Brapa_ESTC000580	AT5G34850	Symbols: ATPAP26, PAP26 | ATPAP26/PAP26 (purple acid phosphatase 26); acid phosphatase/ protein serine/threonine phosphatase | chr5:13125705-13128447 REVERSE	6510.71	3669.67
Brapa_ESTC000581	AT5G10070	Symbols: | RNase L inhibitor protein-related | chr5:3148685-3150325 REVERSE	5666.21	5037.37
Brapa_ESTC000582	AT5G61050	Symbols: | histone deacetylase-related / HD-related | chr5:24582708-24583841 REVERSE	1462.82	8157.24
Brapa_ESTC000583	AT4G34138	Symbols: UGT73B1 | UGT73B1 (UDP-glucosyl transferase 73B1); UDP-glycosyltransferase/ abscisic acid glucosyltransferase | chr4:16348271-16349862 REVERSE	39.5506	21.8712
Brapa_ESTC000584	AT5G43330	Symbols: | malate dehydrogenase, cytosolic, putative | chr5:17407780-17409677 FORWARD	11843.4	13496.9
Brapa_ESTC000585	AT1G29530	Symbols: | similar to unknown protein [Arabidopsis thaliana] (TAIR:AT2G34310.3); similar to expressed protein, putative [Medicago truncatula] (GB:ABE81136.1) | chr1:10325539-10326637 REVERSE	4677.25	9037.13
Brapa_ESTC000586	AT4G30996	Symbols: | similar to unknown protein [Arabidopsis thaliana] (TAIR:AT2G24290.1); similar to H0311C03.8 [Oryza sativa (indica cultivar-group)] (GB:CAH67554.1); similar to Os04g0501800 [Oryza sativa (japonica cultivar-group)] (GB:NP_001053232.1); contains InterPro domain Protein of unknown function DUF1068; (InterPro:IPR010471) | chr4:15101470-15102467 FORWARD	1862.3	1671.11
Brapa_ESTC000587	AT5G10740	Symbols: | protein phosphatase 2C-related / PP2C-related | chr5:3393798-3395849 REVERSE	1248.28	732.844
Brapa_ESTC000588	AT3G26710	Symbols: | similar to Os11g0526200 [Oryza sativa (japonica cultivar-group)] (GB:NP_001067997.1); similar to unnamed protein product [Ostreococcus tauri] (GB:CAL53542.1) | chr3:9814787-9815843 FORWARD	5470.92	18362
Brapa_ESTC000589	AT5G21090	Symbols: | leucine-rich repeat protein, putative | chr5:7164760-7166906 FORWARD	6223.48	10102.1
Brapa_ESTC000590	AT5G52030	| Symbols: | TraB protein-related | chr5:21145517-21147260 FORWARD	257.25	664.679
Brapa_ESTC000591	AT2G30950	Symbols: FTSH2, VAR2 | VAR2 (VARIEGATED 2); ATP-dependent peptidase/ ATPase/ metallopeptidase/ zinc ion binding | chr2:13181769-13184141 FORWARD	6693.31	6812.18
Brapa_ESTC000592	AT3G17390	Symbols: SAMS3, MAT4, MTO3 | MTO3 (S-adenosylmethionine synthase 3); methionine adenosyltransferase | chr3:5952490-5953671 REVERSE	1889.9	189.516
Brapa_ESTC000593	AT3G27090	Symbols: | similar to unknown protein [Arabidopsis thaliana] (TAIR:AT5G42050.1); similar to hypothetical protein [Citrus x paradisi] (GB:CAA04664.1); contains domain KELCH-RELATED PROTEINS (PTHR23230); contains domain no description (SM00767); contains domain SUBFAMILY NOT NAMED (PTHR23230:SF15) | chr3:9991257-9992644 FORWARD	19075.1	29661.8
Brapa_ESTC000594	AT5G18170	Symbols: GDH1 | GDH1 (GLUTAMATE DEHYDROGENASE 1); oxidoreductase | chr5:6006174-6008250 FORWARD	2817.45	4023.93
Brapa_ESTC000595	AT1G54100	Symbols: ALDH7B4 | ALDH7B4 (ALDEHYDE DEHYDROGENASE 7B4); 3-chloroallyl aldehyde dehydrogenase | chr1:20199103-20202521 REVERSE	9177.31	13376.4
Brapa_ESTC000596	AT1G07360	Symbols: | zinc finger (CCCH-type) family protein / RNA recognition motif (RRM)-containing protein | chr1:2260560-2262793 REVERSE	602.822	75.7105
Brapa_ESTC000597	AT2G17390	Symbols: | ankyrin repeat family protein | chr2:7562952-7564825 FORWARD	2154.96	4808.04
Brapa_ESTC000598	AT1G64860	Symbols: SIG1, SIG2, SIGB, RPOD1, SIGA | SIGA (SIGMA FACTOR A); DNA binding / DNA-directed RNA polymerase/ transcription factor | chr1:24102160-24104409 FORWARD	7957.56	18684.8
Brapa_ESTC000599	AT4G32720	| Symbols: | RNA binding | chr4:15787318-15789503 FORWARD	6481.77	5835.19
Brapa_ESTC000600	AT1G16850	Symbols: | similar to unknown protein [Arabidopsis thaliana] (TAIR:AT5G64820.1); similar to 80C09_13 [Brassica rapa subsp. pekinensis] (GB:AAZ41824.1) | chr1:5765055-5765611 REVERSE	4956.13	4926.03
Brapa_ESTC000601	AT5G18550	| Symbols: | nucleic acid binding | chr5:6160517-6162731 FORWARD	6407.9	2967.74
Brapa_ESTC000602	AT3G20770	Symbols: EIN3 | EIN3 (ETHYLENE-INSENSITIVE3); transcription factor | chr3:7260708-7262594 REVERSE	12711.4	6912.82
Brapa_ESTC000603	AT4G24220	Symbols: AWI31, VEP1 | VEP1 (VEIN PATTERNING 1) | chr4:12565229-12566484 FORWARD	23465	2573.68
Brapa_ESTC000604	AT3G58610	Symbols: | ketol-acid reductoisomerase | chr3:21682538-21685616 FORWARD	6589.83	8741.04
Brapa_ESTC000605	AT3G13470	| Symbols: | chaperonin, putative | chr3:4389692-4392631 FORWARD	191.736	805.167
Brapa_ESTC000606	AT5G05170	Symbols: CESA3, IXR1, ATCESA3, ATH-B, CEV1 | CESA3 (CELLULASE SYNTHASE 3); cellulose synthase/ transferase, transferring glycosyl groups | chr5:1530402-1535091 REVERSE	6441.28	3640.85
Brapa_ESTC000607	AT4G38220	Symbols: | aminoacylase, putative / N-acyl-L-amino-acid amidohydrolase, putative | chr4:17925245-17926913 FORWARD	16096.2	4860.38
Brapa_ESTC000608	AT5G11670	Symbols: ATNADP-ME2 | ATNADP-ME2 (NADP-MALIC ENZYME 2); malate dehydrogenase (oxaloacetate-decarboxylating) (NADP+)/ malic enzyme/ oxidoreductase, acting on NADH or NADPH, NAD or NADP as acceptor | chr5:3754457-3758041 FORWARD	17031.5	7120.68
Brapa_ESTC000609	AT1G18740	Symbols: | similar to unknown protein [Arabidopsis thaliana] (TAIR:AT1G74450.1); similar to Protein of unknown function DUF793 [Medicago truncatula] (GB:ABE83157.1); contains InterPro domain Protein of unknown function DUF793; (InterPro:IPR008511) | chr1:6464116-6465264 FORWARD	2466.93	293.935
Brapa_ESTC000610	AT5G03290	Symbols: | isocitrate dehydrogenase, putative / NAD+ isocitrate dehydrogenase, putative | chr5:794042-795938 FORWARD	802.296	261.024
Brapa_ESTC000611	AT1G29150	Symbols: RPN6, ATS9 | ATS9 (19S PROTEOSOME SUBUNIT 9); binding | chr1:10181226-10182485 FORWARD	5668.98	3692.75
Brapa_ESTC000612	AT5G51545	Symbols: | similar to Os02g0125000 [Oryza sativa (japonica cultivar-group)] (GB:NP_001045742.1); contains domain Subunit VIII of photosystem I reaction centre, PsaI (SSF81540) | chr5:20953660-20954469 FORWARD	2549.08	2634.03
Brapa_ESTC000613	AT5G49630	Symbols: AAP6 | AAP6 (AMINO ACID PERMEASE 6); amino acid permease | chr5:20159907-20163667 REVERSE	1578.29	1710.93
Brapa_ESTC000614	AT1G19660	Symbols: | wound-responsive family protein | chr1:6800352-6802231 REVERSE	7089.7	8425.51
Brapa_ESTC000615	AT1G10730	Symbols: | clathrin adaptor complexes medium subunit family protein | chr1:3565464-3567780 FORWARD	2761.66	3324.62
Brapa_ESTC000616	AT1G64040	Symbols: TOPP3 | TOPP3 (Type one serine/threonine protein phosphatase 3); protein phosphatase type 1 | chr1:23762289-23763937 REVERSE	2542.36	3749.22
Brapa_ESTC000617	AT3G14415	Symbols: | (S)-2-hydroxy-acid oxidase, peroxisomal, putative / glycolate oxidase, putative / short chain alpha-hydroxy acid oxidase, putative | chr3:4818674-4820755 FORWARD	4512.65	17762
Brapa_ESTC000618	AT5G44340	Symbols: TUB4 | TUB4 (tubulin beta-4 chain) | chr5:17876669-17878221 REVERSE	12269	6857.19
Brapa_ESTC000619	AT3G06860	Symbols: ATMPF2, MFP2 | MFP2 (MULTIFUNCTIONAL PROTEIN); enoyl-CoA hydratase | chr3:2161932-2166015 FORWARD	81.6561	52.2314
Brapa_ESTC000620	AT5G04430	Symbols: | KH domain-containing protein NOVA, putative | chr5:1250603-1253524 REVERSE	2290.71	1394.42
Brapa_ESTC000621	AT3G55800	Symbols: SBPASE | SBPASE (sedoheptulose-bisphosphatase); phosphoric ester hydrolase | chr3:20720619-20722400 FORWARD	113.671	6712.48
Brapa_ESTC000622	AT1G32900	Symbols: | starch synthase, putative | chr1:11920562-11923486 REVERSE	2235.44	5011.16
Brapa_ESTC000623	AT1G78900	Symbols: VHA-A | VHA-A; ATP binding / hydrogen ion transporting ATP synthase, rotational mechanism | chr1:29665356-29669468 FORWARD	13238	11241.9
Brapa_ESTC000624	AT1G45207	| Symbols: | remorin family protein | chr1:17133143-17135988 REVERSE	1874.34	1691.58
Brapa_ESTC000625	AT1G30820	Symbols: | CTP synthase, putative / UTP--ammonia ligase, putative | chr1:10945232-10948806 REVERSE	1215.48	497.078
Brapa_ESTC000626	AT1G17290	Symbols: ALAAT1 | ALAAT1 (ALANINE AMINOTRANSFERAS); alanine transaminase | chr1:5922764-5926086 FORWARD	5345.23	4785.92
Brapa_ESTC000627	AT3G09770	Symbols: | zinc finger (C3HC4-type RING finger) family protein | chr3:2996407-2997840 REVERSE	6347.23	2414.95
Brapa_ESTC000628	AT5G67290	Symbols: | FAD-dependent oxidoreductase family protein | chr5:26865645-26866981 REVERSE	1421.01	1180.27
Brapa_ESTC000629	AT5G25350	Symbols: EBF2 | EBF2 (EIN3-BINDING F BOX PROTEIN 2) | chr5:8794845-8796885 REVERSE	13447.5	13617.9
Brapa_ESTC000630	AT3G54050	Symbols: | fructose-1,6-bisphosphatase, putative / D-fructose-1,6-bisphosphate 1-phosphohydrolase, putative / FBPase, putative | chr3:20027929-20029505 FORWARD	3481.89	6774.22
Brapa_ESTC000631	AT4G35300	Symbols: TMT2 | TMT2 (TONOPLAST MONOSACCHARIDE TRANSPORTER2); carbohydrate transporter/ nucleoside transporter/ sugar porter | chr4:16796437-16799076 REVERSE	8615.67	7268.11
Brapa_ESTC000632	AT2G46930	Symbols: | pectinacetylesterase, putative | chr2:19290694-19293159 FORWARD	1118.72	1208.82
Brapa_ESTC000633	AT4G18370	Symbols: DEGP5, HHOA | HHOA (DEGP PROTEASE 5); serine-type peptidase/ trypsin | chr4:10149246-10151062 FORWARD	347.084	1716.95
Brapa_ESTC000634	no_hits_f	---------	270.802	719.525
Brapa_ESTC000635	AT1G74380	Symbols: | galactosyl transferase GMA12/MNN10 family protein | chr1:27963509-27964882 FORWARD	1807.47	907.453
Brapa_ESTC000636	AT5G60570	Symbols: | kelch repeat-containing F-box family protein | chr5:24365939-24367120 FORWARD	846.004	543.789
Brapa_ESTC000637	AT2G25640	Symbols: | similar to transcription elongation factor-related [Arabidopsis thaliana] (TAIR:AT5G25520.2); similar to PHD finger protein-like [Oryza sativa (japonica cultivar-group)] (GB:BAD24999.1); similar to Os02g0208600 [Oryza sativa (japonica cultivar-group)] (GB:NP_001046260.1); contains InterPro domain Transcription elongation factor S-II, central region; (InterPro:IPR003618); contains Inter…	989.668	820.5
Brapa_ESTC000638	AT3G63010	Symbols: ATGID1B, GID1B | ATGID1B/GID1B (GA INSENSITIVE DWARF1B) | chr3:23300692-23301973 FORWARD	506.395	394.806
Brapa_ESTC000639	AT5G15230	Symbols: GASA4 | GASA4 (GAST1 PROTEIN HOMOLOG 4) | chr5:4945020-4946028 FORWARD	94.701	1710.35
Brapa_ESTC000640	AT3G62550	Symbols: | universal stress protein (USP) family protein | chr3:23147170-23148050 FORWARD	29068.4	21972.1
Brapa_ESTC000641	AT2G37440	Symbols: | endonuclease/exonuclease/phosphatase family protein | chr2:15727319-15728964 FORWARD	89.7826	182.597
Brapa_ESTC000642	AT5G16360	Symbols: | NC domain-containing protein | chr5:5355239-5356198 REVERSE	18158.1	24737.3
Brapa_ESTC000643	AT2G01820	Symbols: | leucine-rich repeat protein kinase, putative | chr2:357663-360680 REVERSE	5043.43	4556.54
Brapa_ESTC000644	AT3G15810	Symbols: | similar to unknown protein [Arabidopsis thaliana] (TAIR:AT1G80120.1); similar to Os01g0771000 [Oryza sativa (japonica cultivar-group)] (GB:NP_001044381.1); similar to hypothetical protein-like protein [Sorghum bicolor] (GB:AAO16702.1); similar to Os05g0510100 [Oryza sativa (japonica cultivar-group)] (GB:NP_001056006.1); contains InterPro domain Protein of unknown function DUF567; (Inte…	12212.9	8660.62
Brapa_ESTC000645	AT5G27760	Symbols: | hypoxia-responsive family protein | chr5:9830400-9831563 FORWARD	1292.51	1739.67
Brapa_ESTC000646	AT1G68990	Symbols: | DNA-directed RNA polymerase, mitochondrial (RPOMT) | chr1:25939162-25944418 REVERSE	528.193	148.556
Brapa_ESTC000647	AT3G24160	Symbols: PMP | PMP (PUTATIVE TYPE 1 MEMBRANE PROTEIN) | chr3:8726248-8729030 FORWARD	5987.11	5258.41
Brapa_ESTC000648	AT2G39530	Symbols: | integral membrane protein, putative | chr2:16505737-16506479 REVERSE	30347.8	38599.7
Brapa_ESTC000649	AT4G29010	Symbols: AIM1 | AIM1 (ABNORMAL INFLORESCENCE MERISTEM); enoyl-CoA hydratase | chr4:14297318-14302022 REVERSE	243.792	340.393
Brapa_ESTC000650	AT5G53350	Symbols: CLPX | CLPX (Clp protease regulatory subunit X); ATPase | chr5:21661286-21664729 FORWARD	2809.2	5305.81
Brapa_ESTC000651	AT4G32410	Symbols: CESA1, RSW1 | CESA1 (CELLULASE SYNTHASE 1); transferase, transferring glycosyl groups | chr4:15641015-15646394 REVERSE	13361.6	4947.16
Brapa_ESTC000652	no_hits_f	---------	1401.83	1518.42
Brapa_ESTC000653	AT2G35635	Symbols: RUB2, UBQ7 | UBQ7 (RELATED TO UBIQUITIN 2) | chr2:14988123-14989022 FORWARD	4596.46	4235.36
Brapa_ESTC000654	AT5G01320	Symbols: | pyruvate decarboxylase, putative | chr5:129483-131624 REVERSE	441.674	269.268
Brapa_ESTC000655	AT1G72830	Symbols: ATHAP2C, HAP2, HAP2C | HAP2C (Heme activator protein (yeast) homolog 2C); transcription factor | chr1:27409361-27410750 REVERSE	1003.81	1400.69
Brapa_ESTC000656	AT5G27920	| Symbols: | F-box family protein | chr5:9942067-9944511 REVERSE	18.2624	17.1942
Brapa_ESTC000657	AT1G20260	Symbols: | (VACUOLAR ATP SYNTHASE SUBUNIT B3); ATP binding / hydrogen ion transporting ATP synthase, rotational mechanism / hydrogen ion transporting ATPase, rotational mechanism / hydrogen-exporting ATPase, phosphorylative mechanism | chr1:7016962-7020280 FORWARD	14271	14008.5
Brapa_ESTC000658	AT2G29560	| Symbols: | enolase, putative | chr2:12653712-12656771 FORWARD	429.723	763.139
Brapa_ESTC000659	AT4G09320	Symbols: NDPK1 | NDPK1 (nucleoside diphosphate kinase 1); ATP binding / nucleoside diphosphate kinase | chr4:5923421-5924363 FORWARD	15677.4	24933.7
Brapa_ESTC000660	AT3G58170	Symbols: ATBET11, BET11, ATBS14A | ATBS14A; protein transporter | chr3:21553609-21554752 REVERSE	7552.73	11564
Brapa_ESTC000661	AT1G74970	Symbols: TWN3, RPS9 | RPS9 (RIBOSOMAL PROTEIN S9); structural constituent of ribosome | chr1:28161422-28162863 REVERSE	19820.5	23756.6
Brapa_ESTC000662	AT4G02430	Symbols: | pre-mRNA splicing factor, putative / SR1 protein, putative | chr4:1069186-1071313 FORWARD	16453.2	13361.6
Brapa_ESTC000663	AT5G17550	Symbols: | peroxisomal protein PEX19 family protein | chr5:5786745-5788168 REVERSE	5398.96	5702.8
Brapa_ESTC000665	AT2G21640	Symbols: | similar to unknown protein [Arabidopsis thaliana] (TAIR:AT3G05570.1); similar to unknown protein [Arabidopsis thaliana] (TAIR:AT4G39235.1); similar to hypothetical protein [Oryza sativa (japonica cultivar-group)] (GB:BAD05323.1); similar to Os03g0724500 [Oryza sativa (japonica cultivar-group)] (GB:NP_001051122.1) | chr2:9262065-9262533 FORWARD	792.584	247.256
Brapa_ESTC000666	no_hits_f	---------	88.2678	510.425
Brapa_ESTC000667	AT3G27300	Symbols: G6PD5 | G6PD5 (GLUCOSE-6-PHOSPHATE DEHYDROGENASE 5) | chr3:10084555-10087525 REVERSE	604.166	463.844
Brapa_ESTC000668	AT5G55940	Symbols: EMB2731 | EMB2731 (EMBRYO DEFECTIVE 2731) | chr5:22673482-22675120 REVERSE	699.991	205.171
Brapa_ESTC000669	AT4G09620	Symbols: | similar to unnamed protein product [Ostreococcus tauri] (GB:CAL57113.1); similar to Os03g0838900 [Oryza sativa (japonica cultivar-group)] (GB:NP_001051838.1); contains InterPro domain Mitochodrial transcription termination factor-related; (InterPro:IPR003690) | chr4:6077119-6078896 REVERSE	4402.65	8032.61
Brapa_ESTC000670	AT2G33450	Symbols: | 50S ribosomal protein L28, chloroplast (CL28) | chr2:14180696-14181456 FORWARD	2937.65	4439.11
Brapa_ESTC000671	AT5G64350	Symbols: ATFKBP12, FKBP12 | FKBP12 (FK506-binding protein 12 kD); FK506 binding / peptidyl-prolyl cis-trans isomerase | chr5:25752036-25753216 REVERSE	4324.89	5117.38
Brapa_ESTC000672	AT3G49780	Symbols: ATPSK3 (FORMER SYMBOL), ATPSK4 | ATPSK4 (PHYTOSULFOKINE 4 PRECURSOR); growth factor | chr3:18476735-18477239 FORWARD	637.195	448.868
Brapa_ESTC000673	AT5G52060	Symbols: ATBAG1 | ATBAG1 (ARABIDOPSIS THALIANA BCL-2-ASSOCIATED ATHANOGENE 1); protein binding | chr5:21169675-21170967 REVERSE	1437.06	2413.83
Brapa_ESTC000674	AT1G56220	Symbols: | dormancy/auxin associated family protein | chr1:21047079-21048046 FORWARD	56949.7	58817
Brapa_ESTC000675	AT2G29960	Symbols: ATCYP5, CYP5 | CYP5 (cyclophilin 5); peptidyl-prolyl cis-trans isomerase | chr2:12776260-12777605 REVERSE	34018.7	32025
Brapa_ESTC000676	no_hits_f	---------	14339.6	14849.9
Brapa_ESTC000677	AT1G60640	Symbols: | similar to unknown protein [Arabidopsis thaliana] (TAIR:AT2G22795.1); similar to Zinc finger, U1-type [Medicago truncatula] (GB:ABE93667.1) | chr1:22341199-22343178 REVERSE	1403.02	1443.78
Brapa_ESTC000679	AT5G32440	Symbols: | similar to unknown protein [Arabidopsis thaliana] (TAIR:AT1G80040.1); similar to Os06g0642900 [Oryza sativa (japonica cultivar-group)] (GB:NP_001058174.1); similar to Ubiquitin system component Cue; UBA-like [Medicago truncatula] (GB:ABE77893.1); contains InterPro domain UBA-like; (InterPro:IPR009060); contains InterPro domain Ubiquitin system component Cue; (InterPro:IPR003892) | chr5…	3451.82	3067.49
Brapa_ESTC000680	AT3G54826	Symbols: | similar to Os02g0819700 [Oryza sativa (japonica cultivar-group)] (GB:NP_001048537.1); similar to Zinc finger, Zim17-type [Medicago truncatula] (GB:ABE87819.1); contains InterPro domain Zinc finger, Zim17-type; (InterPro:IPR007853) | chr3:20321332-20322630 FORWARD	1424.65	2195.29
Brapa_ESTC000681	AT2G24120	Symbols: PDE319, SCA3 | PDE319/SCA3 (PIGMENT DEFECTIVE 319, SCABRA 3); DNA binding / DNA-directed RNA polymerase | chr2:10256438-10261610 REVERSE	857.956	534.6
Brapa_ESTC000682	AT4G25100	Symbols: FSD1 | FSD1 (FE SUPEROXIDE DISMUTASE 1); iron superoxide dismutase | chr4:12884659-12886511 REVERSE	154.273	67.5662
Brapa_ESTC000683	AT2G44100	Symbols: | ATGDI1 (Arabidopsis thaliana guanosine diphosphate dissociation inhibitor 1) | chr2:18248880-18251940 FORWARD	13112.4	22132.1
Brapa_ESTC000684	no_hits_f	---------	91.0218	28921.2
Brapa_ESTC000685	AT2G37770	| Symbols: | oxidoreductase | chr2:15841966-15843737 FORWARD	747.844	440.639
Brapa_ESTC000687	AT1G32550	Symbols: | ferredoxin family protein | chr1:11771949-11774097 REVERSE	11074.1	29201.4
Brapa_ESTC000688	AT1G73325	Symbols: | trypsin and protease inhibitor family protein / Kunitz family protein | chr1:27571179-27571847 REVERSE	404.685	1615.48
Brapa_ESTC000689	AT5G02280	| Symbols: | synbindin, putative | chr5:469375-470127 FORWARD	7003.63	6915.35
Brapa_ESTC000690	AT5G67070	Symbols: RALFL34 | RALFL34 (RALF-LIKE 34) | chr5:26785346-26785735 FORWARD	89.0945	69.7927
Brapa_ESTC000691	AT2G21160	Symbols: | translocon-associated protein alpha (TRAP alpha) family protein | chr2:9075509-9077288 FORWARD	3714.28	4163.42
Brapa_ESTC000692	AT1G52030	Symbols: MBP1.2, F-ATMBP, MBP2 | MBP2 (MYROSINASE-BINDING PROTEIN 2) | chr1:19349759-19351951 REVERSE	743.786	709.241
Brapa_ESTC000693	AT1G18030	Symbols: | protein phosphatase 2C, putative / PP2C, putative | chr1:6204393-6206329 FORWARD	77.5641	573.911
Brapa_ESTC000695	AT5G47370	Symbols: HAT2 | HAT2; transcription factor | chr5:19233709-19234874 REVERSE	1642.88	1636.6
Brapa_ESTC000696	AT1G26230	| Symbols: | chaperonin, putative | chr1:9072375-9075259 REVERSE	6107.62	4250.92
Brapa_ESTC000697	AT2G07727	Symbols: | cytochrome b (MTCYB) (COB) (CYTB) | chr2:3450860-3452041 FORWARD	29878.8	21578.8
Brapa_ESTC000698	AT5G12110	Symbols: | elongation factor 1B alpha-subunit 1 (eEF1Balpha1) | chr5:3914484-3915733 FORWARD	1404.94	2472.58
Brapa_ESTC000699	AT4G14030	Symbols: | selenium-binding protein, putative | chr4:8098116-8100160 REVERSE	4171.6	1434.46
Brapa_ESTC000700	AT2G27290	Symbols: | similar to unknown protein [Arabidopsis thaliana] (TAIR:AT2G20940.1); similar to Os04g0416000 [Oryza sativa (japonica cultivar-group)] (GB:NP_001052762.1); similar to Predicted membrane protein (ISS) [Ostreococcus tauri] (GB:CAL57011.1); similar to OSIGBa0092M08.4 [Oryza sativa (indica cultivar-group)] (GB:CAH67592.1); contains InterPro domain Protein of unknown function DUF1279; (Inte…	100.871	149.356
Brapa_ESTC000701	AT5G61820	Symbols: | similar to hypothetical protein [Trifolium pratense] (GB:BAE71234.1); contains InterPro domain Stress up-regulated Nod 19; (InterPro:IPR011692) | chr5:24851731-24853449 REVERSE	1823.54	894.394
Brapa_ESTC000702	AT4G21192	Symbols: | similar to PREDICTED: similar to UPF0287 protein DC13 [Tribolium castaneum] (GB:XP_968870.1); contains domain UPF0287 FAMILY (PTHR22977); contains domain DC13/UPF0287 FAMILY (PTHR22977:SF1) | chr4:11294573-11295202 FORWARD	27.6088	21.1388
Brapa_ESTC000703	AT2G32710	Symbols: ACK2, ICK7, KRP4 | KRP4 (KIP-RELATED PROTEIN 4) | chr2:13880573-13882427 FORWARD	213.384	236.551
Brapa_ESTC000704	AT4G24210	| Symbols: SLY1 | SLY1 (SLEEPY1) | chr4:12563668-12564123 FORWARD	9714.1	8171.04
Brapa_ESTC000705	AT3G06700	Symbols: | structural constituent of ribosome | chr3:2117525-2117806 REVERSE	13189.8	15598.7
Brapa_ESTC000706	AT5G35730	Symbols: | EXS family protein / ERD1/XPR1/SYG1 family protein | chr5:13911171-13914051 FORWARD	777.255	653.654
Brapa_ESTC000707	AT4G30530	Symbols: | defense-related protein, putative | chr4:14920611-14922292 FORWARD	84.9711	129.898
Brapa_ESTC000708	AT3G10520	Symbols: GLB2, ARATH GLB2, NSHB2, AHB2 | AHB2 (NON-SYMBIOTIC HAEMOGLOBIN 2) | chr3:3276521-3277770 REVERSE	4823.31	10594.6
Brapa_ESTC000709	AT1G50900	Symbols: | similar to unnamed protein product [Ostreococcus tauri] (GB:CAL57548.1); similar to Os07g0520800 [Oryza sativa (japonica cultivar-group)] (GB:NP_001059804.1); contains InterPro domain Ankyrin; (InterPro:IPR002110) | chr1:18869940-18870682 FORWARD	2131.78	8216.17
Brapa_ESTC000710	AT4G26840	Symbols: SUMO 1, SUMO1, SUM1 | SUM1 (SMALL UBIQUITIN-LIKE MODIFIER 1) | chr4:13497472-13498464 FORWARD	29116.1	37920
Brapa_ESTC000711	AT5G47770	Symbols: FPS1 | FPS1 (FARNESYL DIPHOSPHATE SYNTHASE 1); dimethylallyltranstransferase/ geranyltranstransferase | chr5:19362523-19364641 FORWARD	1725.95	1319.24
Brapa_ESTC000713	AT2G31800	Symbols: | ankyrin protein kinase, putative | chr2:13527682-13530723 REVERSE	4662.95	3228.73
Brapa_ESTC000714	AT2G36145	Symbols: | similar to Os01g0862200 [Oryza sativa (japonica cultivar-group)] (GB:NP_001044880.1) | chr2:15175650-15176452 FORWARD	500.738	616.445
Brapa_ESTC000715	AT5G47820	Symbols: FRA1 | FRA1 (FRAGILE FIBER 1); microtubule motor | chr5:19383731-19389455 FORWARD	290.559	1063.36
Brapa_ESTC000716	AT5G41970	Symbols: | similar to unknown protein [Arabidopsis thaliana] (TAIR:AT3G49320.1); similar to LOC496075 protein [Xenopus laevis] (GB:AAH87491.1); similar to LOC496075 protein [Xenopus laevis] (GB:AAI06661.1); similar to Os02g0686600 [Oryza sativa (japonica cultivar-group)] (GB:NP_001047772.1); contains InterPro domain Metal-dependent protein hydrolase; (InterPro:IPR003226) | chr5:16808426-16810189 …	1854.11	1741.32
Brapa_ESTC000717	AT3G18080	Symbols: | glycosyl hydrolase family 1 protein | chr3:6191592-6194130 FORWARD	1739.7	12350.2
Brapa_ESTC000718	AT5G15650	Symbols: REVERSIBLY GLYCOSYLATED POLYPEPTIDE 2, RGP2 | RGP2 (Reversibly glycosylated polypeptide-3); DNA binding / alpha-1,4-glucan-protein synthase (UDP-forming) | chr5:5092206-5094096 FORWARD	951.377	529.79
Brapa_ESTC000719	AT3G16420	Symbols: PBP1 | PBP1 (PYK10-BINDING PROTEIN 1) | chr3:5579566-5580680 FORWARD	20.795	22.9724
Brapa_ESTC000720	AT5G03630	Symbols: | monodehydroascorbate reductase, putative | chr5:922377-924615 REVERSE	11344.8	15987
Brapa_ESTC000721	AT3G55010	Symbols: ATPURM, PUR5 | phosphoribosylformylglycinamidine cyclo-ligase, chloroplast / phosphoribosyl-aminoimidazole synthetase / AIR synthase (PUR5) | chr3:20397795-20399526 FORWARD	3840.66	6980.82
Brapa_ESTC000722	AT4G10110	Symbols: | RNA recognition motif (RRM)-containing protein | chr4:6309602-6310805 REVERSE	1782.77	3700.78
Brapa_ESTC000723	AT2G17220	| Symbols: | protein kinase, putative | chr2:7494948-7496850 REVERSE	1792.45	1609.84
Brapa_ESTC000724	AT4G34260	Symbols: | similar to Hypothetical protein [Oryza sativa] (GB:AAK98716.1); similar to large secreted protein, putative, expressed [Oryza sativa (japonica cultivar-group)] (GB:ABG66023.1); similar to large secreted protein, putative, expressed [Oryza sativa (japonica cultivar-group)] (GB:ABG66022.1); contains InterPro domain Six-hairpin glycosidase; (InterPro:IPR008928) | chr4:16398134-16401595 FO…	161.487	67.0525
Brapa_ESTC000725	AT2G04390	Symbols: | 40S ribosomal protein S17 (RPS17A) | chr2:1527908-1528333 FORWARD	4896.61	5944.06
Brapa_ESTC000726	AT2G39750	Symbols: | dehydration-responsive family protein | chr2:16586064-16589359 REVERSE	4095.43	3220.3
Brapa_ESTC000727	AT3G47500	Symbols: CDF3 | CDF3 (CYCLING DOF FACTOR 3); DNA binding / protein binding / transcription factor | chr3:17515261-17516949 REVERSE	21925.6	7712.62
Brapa_ESTC000728	AT5G57340	Symbols: | similar to unknown protein [Arabidopsis thaliana] (TAIR:AT5G67390.2); similar to conserved hypothetical protein [Medicago truncatula] (GB:ABE83997.1) | chr5:23245248-23246320 FORWARD	3990.51	4291.79
Brapa_ESTC000729	AT3G15353	Symbols: MT3 | MT3 (METALLOTHIONEIN 3) | chr3:5180832-5181332 REVERSE	19722.3	21849.8
Brapa_ESTC000730	AT5G47550	Symbols: | cysteine protease inhibitor, putative / cystatin, putative | chr5:19303822-19304190 REVERSE	2512.7	2266.55
Brapa_ESTC000731	AT5G62540	Symbols: UBC3 | UBC3 (ubiquitin-conjugating enzyme 29); ubiquitin-protein ligase | chr5:25121905-25122691 FORWARD	7141.45	4660.84
Brapa_ESTC000732	AT1G22950	Symbols: | oxidoreductase, acting on paired donors, with incorporation or reduction of molecular oxygen, 2-oxoglutarate as one donor, and incorporation of one atom each of oxygen into both donors | chr1:8125280-8127157 REVERSE	1040.29	878.306
Brapa_ESTC000734	AT4G37200	Symbols: HCF164 | HCF164 (High chlorophyll fluorescence 164); thiol-disulfide exchange intermediate | chr4:17509830-17511224 REVERSE	1935.16	3432.48
Brapa_ESTC000735	AT5G25560	Symbols: | zinc finger (C3HC4-type RING finger) family protein | chr5:8899489-8901394 FORWARD	14796.2	6406.79
Brapa_ESTC000736	AT2G16700	Symbols: ADF5 | ADF5 (ACTIN DEPOLYMERIZING FACTOR 5); actin binding | chr2:7251799-7252549 FORWARD	2858.93	254.049
Brapa_ESTC000737	AT2G17340	Symbols: | pantothenate kinase-related | chr2:7548697-7551171 REVERSE	179.288	1273.64
Brapa_ESTC000738	AT1G47710	Symbols: | serpin, putative / serine protease inhibitor, putative | chr1:17560711-17562501 FORWARD	13117.4	2726.75
Brapa_ESTC000739	AT2G33835	Symbols: FES1 | FES1 (FRIGIDA-ESSENTIAL 1); nucleic acid binding | chr2:14319221-14321642 REVERSE	1436.31	968.483
Brapa_ESTC000740	AT2G46510	Symbols: | basic helix-loop-helix (bHLH) family protein | chr2:19098259-19099959 REVERSE	13.8273	12.862
Brapa_ESTC000741	AT4G02770	Symbols: PSAD-1 | PSAD-1 (photosystem I subunit D-1) | chr4:1229247-1229873 REVERSE	14698.8	24999.7
Brapa_ESTC000742	AT3G14240	| Symbols: | subtilase family protein | chr3:4741644-4743971 REVERSE	664.231	867.768
Brapa_ESTC000743	AT5G42020	Symbols: BIP | BIP (LUMINAL BINDING PROTEIN); ATP binding | chr5:16824925-16827708 REVERSE	6512.14	5223.52
Brapa_ESTC000744	AT1G33030	Symbols: | O-methyltransferase family 2 protein | chr1:11964865-11966192 REVERSE	34.7162	45.4963
Brapa_ESTC000745	AT4G20870	Symbols: | fatty acid hydroxylase, putative | chr4:11174631-11175889 REVERSE	1062.58	620.803
Brapa_ESTC000746	AT1G66240	Symbols: ATX1 | ATX1; metal ion binding | chr1:24690108-24690990 REVERSE	831.154	927.769
Brapa_ESTC000747	AT1G06650	Symbols: | 2-oxoglutarate-dependent dioxygenase, putative | chr1:2035908-2037185 FORWARD	566.713	1056.25
Brapa_ESTC000748	AT2G35050	Symbols: | protein kinase family protein | chr2:14776787-14781875 FORWARD	407.315	78.2783
Brapa_ESTC000749	AT4G29240	Symbols: | leucine-rich repeat family protein / extensin family protein | chr4:14418832-14420079 FORWARD	110.078	545.891
Brapa_ESTC000750	AT3G15730	Symbols: PLD, PLDALPHA1 | PLDALPHA1 (PHOSPHOLIPASE D ALPHA 1); phospholipase D | chr3:5330842-5333481 FORWARD	17889.8	9340.6
Brapa_ESTC000751	AT1G14700	Symbols: PAP3, ATPAP3 | ATPAP3/PAP3 (purple acid phosphatase 3); acid phosphatase/ protein serine/threonine phosphatase | chr1:5058675-5060983 FORWARD	103.09	4326.04
Brapa_ESTC000752	AT2G25180	Symbols: ARR12 | ARR12 (ARABIDOPSIS RESPONSE REGULATOR 12); transcription factor/ two-component response regulator | chr2:10731569-10734040 REVERSE	2484.83	1092.97
Brapa_ESTC000753	AT3G57890	Symbols: | tubulin-specific chaperone C-related | chr3:21449248-21452672 FORWARD	2326.43	767.543
Brapa_ESTC000754	AT3G56240	Symbols: ATX1, CCH | CCH (COPPER CHAPERONE) | chr3:20874439-20875381 REVERSE	3236.92	4453.05
Brapa_ESTC000755	AT2G04520	Symbols: | eukaryotic translation initiation factor 1A, putative / eIF-1A, putative / eIF-4C, putative | chr2:1574799-1575236 REVERSE	20755.2	33235.6
Brapa_ESTC000756	no_hits_f	---------	97.3519	283.768
Brapa_ESTC000757	AT3G24460	Symbols: | TMS membrane family protein / tumour differentially expressed (TDE) family protein | chr3:8886167-8889724 REVERSE	204.53	207.484
Brapa_ESTC000758	AT1G19920	Symbols: ASA1, APS2 | APS2 (ATP SULFURYLASE PRECURSOR) | chr1:6914826-6916648 REVERSE	1024.01	1306.36
Brapa_ESTC000759	AT5G27670	| Symbols: | histone H2A, putative | chr5:9792810-9793368 REVERSE	1191.13	600.181
Brapa_ESTC000760	AT5G51700	Symbols: ATRAR1, RPR2, RAR1, PBS2 | PBS2 (PPHB SUSCEPTIBLE 2) | chr5:21018599-21020302 REVERSE	1541.71	1272.32
Brapa_ESTC000761	AT5G24290	Symbols: | integral membrane family protein | chr5:8263274-8265621 REVERSE	16.583	11.042
Brapa_ESTC000762	AT1G06260	Symbols: | cysteine proteinase, putative | chr1:1916448-1917584 FORWARD	280.081	397.788
Brapa_ESTC000763	AT3G06400	Symbols: CHR11 | CHR11 (CHROMATIN-REMODELING PROTEIN 11); DNA-dependent ATPase | chr3:1941072-1946706 FORWARD	2144.32	1494.46
Brapa_ESTC000764	AT1G23190	Symbols: | phosphoglucomutase, cytoplasmic, putative / glucose phosphomutase, putative | chr1:8219935-8224175 FORWARD	648.539	1290.71
Brapa_ESTC000765	AT2G23000	Symbols: SCPL10 | SCPL10 (serine carboxypeptidase-like 10); serine carboxypeptidase | chr2:9799364-9802821 FORWARD	638.213	1469.75
Brapa_ESTC000766	AT5G54310	Symbols: AGD5 | AGD5 (ARF-GAP DOMAIN 5); DNA binding | chr5:22074488-22078292 REVERSE	1768.74	559.452
Brapa_ESTC000767	AT3G04920	Symbols: | 40S ribosomal protein S24 (RPS24A) | chr3:1360995-1362071 FORWARD	41684	42268
Brapa_ESTC000768	AT2G34560	| Symbols: | katanin, putative | chr2:14567345-14569774 FORWARD	655.414	216.125
Brapa_ESTC000770	no_hits_f	---------	213.085	219.926
Brapa_ESTC000771	AT5G02380	Symbols: MT2B | MT2B (METALLOTHIONEIN 2B) | chr5:506753-507162 REVERSE	10196.2	13204.4
Brapa_ESTC000772	AT5G64740	Symbols: CESA6, IXR2, E112, PRC1 | CESA6 (CELLULASE SYNTHASE 6); transferase, transferring glycosyl groups | chr5:25898781-25903559 FORWARD	857.003	728.156
Brapa_ESTC000773	AT1G15690	Symbols: ATAVP3, AVP-3, AVP1 | AVP1 (vacuolar-type H+-pumping pyrophosphatase 1); ATPase | chr1:5399110-5402180 FORWARD	4745.95	1158.08
Brapa_ESTC000774	AT5G48580	Symbols: FKBP15-2 | FKBP15-2 (FK506-binding protein 15 kD-2); FK506 binding / peptidyl-prolyl cis-trans isomerase | chr5:19713382-19714530 REVERSE	1264.9	5456.67
Brapa_ESTC000775	AT1G76260	Symbols: | transducin family protein / WD-40 repeat family protein | chr1:28615257-28617892 FORWARD	45.5696	85.0378
Brapa_ESTC000776	AT5G41210	Symbols: GST10, ATGSTT1 | ATGSTT1 (Arabidopsis thaliana Glutathione S-transferase (class theta) 1); glutathione transferase | chr5:16509778-16511112 REVERSE	5212.47	12537.6
Brapa_ESTC000777	AT1G23490	Symbols: ATARFA1A, ATARF1, ATARF | ATARF/ATARF1/ATARFA1A (ADP-RIBOSYLATION FACTOR 1); GTP binding / phospholipase activator/ protein binding | chr1:8337221-8338362 FORWARD	12002.9	13798.6
Brapa_ESTC000778	AT5G66760	Symbols: SDH1-1 | SDH1-1 (Succinate dehydrogenase 1-1) | chr5:26671002-26674450 FORWARD	1500.85	2557.48
Brapa_ESTC000779	AT1G49480	Symbols: RTV1 | RTV1 (RELATED TO VERNALIZATION1 1); DNA binding / transcription factor | chr1:18318264-18319128 REVERSE	813.785	2788.93
Brapa_ESTC000780	AT4G20930	Symbols: | 3-hydroxyisobutyrate dehydrogenase, putative | chr4:11198638-11201047 REVERSE	1000.25	2918.31
Brapa_ESTC000781	AT1G23260	Symbols: MMZ1 | MMZ1 (MMS ZWEI HOMOLOGE 1); ubiquitin-protein ligase | chr1:8257198-8258562 REVERSE	13363.2	16634.5
Brapa_ESTC000782	AT4G20890	Symbols: TUB9 | TUB9 (tubulin beta-9 chain); structural molecule | chr4:11182229-11183851 FORWARD	10389	5907.07
Brapa_ESTC000783	AT3G05560	Symbols: | structural constituent of ribosome | chr3:1614647-1615210 FORWARD	13224.8	14097.8
Brapa_ESTC000784	AT2G35620	Symbols: | leucine-rich repeat transmembrane protein kinase, putative | chr2:14968266-14971719 REVERSE	4781.47	3694.75
Brapa_ESTC000785	AT5G06450	Symbols: | Identical to Protein At5g06450 [Arabidopsis Thaliana] (GB:Q9FNG3); similar to unknown protein [Arabidopsis thaliana] (TAIR:AT3G11770.1); contains InterPro domain Polynucleotidyl transferase, Ribonuclease H fold; (InterPro:IPR012337) | chr5:1967870-1968490 REVERSE	9155.29	7819.1
Brapa_ESTC000786	AT1G52230	Symbols: PSAH2, PSAH-2, PSI-H | photosystem I reaction center subunit VI, chloroplast, putative / PSI-H, putative (PSAH2) | chr1:19458571-19459177 FORWARD	2738.25	8033.37
Brapa_ESTC000787	AT1G13060	Symbols: PBE1 | PBE1 (20S proteasome beta subunit E1); peptidase | chr1:4452639-4454661 FORWARD	21963.8	20963.2
Brapa_ESTC000788	no_hits_f	---------	3735.77	8507.65
Brapa_ESTC000789	AT1G54490	Symbols: EIN5, XRN4, AIN1 | AIN1 (ACC INSENSITIVE 1); 5'-3' exonuclease/ nucleic acid binding | chr1:20353967-20360317 FORWARD	3288.13	3596.24
Brapa_ESTC000790	AT1G24050	Symbols: | similar to unknown protein [Arabidopsis thaliana] (TAIR:AT1G70220.1); similar to hypothetical protein Afu6g08070 [Asper (GB:XP_750698.1); similar to Os02g0741900 [Oryza sativa (japonica cultivar-group)] (GB:NP_001048085.1); contains domain FAMILY NOT NAMED (PTHR13542); contains domain SUBFAMILY NOT NAMED (PTHR13542:SF2) | chr1:8507046-8508428 FORWARD	9247.75	10331.3
Brapa_ESTC000791	AT2G17760	Symbols: | aspartyl protease family protein | chr2:7720570-7723351 FORWARD	2647.11	2736.21
Brapa_ESTC000792	no_hits_f	---------	371.586	501.963
Brapa_ESTC000793	no_hits_f	---------	71.6747	53.2607
Brapa_ESTC000794	AT1G52680	Symbols: | late embryogenesis abundant protein-related / LEA protein-related | chr1:19622087-19622629 REVERSE	4.69	9.0822
Brapa_ESTC000795	AT4G14420	Symbols: | lesion inducing protein-related | chr4:8302167-8303734 REVERSE	4385.57	6101.25
Brapa_ESTC000796	no_hits_f	---------	7.811	10.3923
Brapa_ESTC000797	AT4G31340	Symbols: | myosin heavy chain-related | chr4:15205668-15208956 FORWARD	1072.4	394.525
Brapa_ESTC000798	AT5G66170	Symbols: | similar to unknown protein [Arabidopsis thaliana] (TAIR:AT2G17850.1); similar to Rhodanese-like domain [Medicago truncatula] (GB:ABE88183.1); contains InterPro domain Rhodanese-like; (InterPro:IPR001763) | chr5:26465054-26465808 FORWARD	969.63	1591
Brapa_ESTC000799	AT4G02140	Symbols: | similar to unknown protein [Arabidopsis thaliana] (TAIR:AT1G02700.1) | chr4:949810-950240 REVERSE	816.322	780.685
Brapa_ESTC000800	no_hits_f	---------	126.385	463.603
Brapa_ESTC000801	AT4G16155	Symbols: | dihydrolipoamide dehydrogenase 2, plastidic / lipoamide dehydrogenase 2 (PTLPD2) | chr4:9153586-9157149 REVERSE	154.487	162.883
Brapa_ESTC000802	AT4G08900	| Symbols: | arginase | chr4:5703496-5705177 FORWARD	441.447	662.045
Brapa_ESTC000803	AT1G70940	Symbols: PIN3 | PIN3 (PIN-FORMED 3); auxin:hydrogen symporter/ transporter | chr1:26746832-26749533 FORWARD	4674.25	6183.19
Brapa_ESTC000804	AT5G55000	Symbols: FIP2 | FIP2 (FH protein interacting protein 2); voltage-gated potassium channel | chr5:22335870-22338825 FORWARD	945.491	3231.73
Brapa_ESTC000805	AT3G02230	Symbols: ATRGP1, ATRGP, RGP1 | RGP1 (REVERSIBLY GLYCOSYLATED POLYPEPTIDE 1) | chr3:415470-417311 FORWARD	550.412	728.666
Brapa_ESTC000806	AT5G43020	Symbols: | leucine-rich repeat transmembrane protein kinase, putative | chr5:17272654-17274970 REVERSE	1690.14	1634.52
Brapa_ESTC000807	AT4G34720	Symbols: VHA-C1, ATVHA-C1, AVA-P1 | AVA-P1 (vacuolar H+-pumping ATPase 16 kDa proteolipid subunit 1); ATPase/ hydrogen ion transporting ATPase, rotational mechanism | chr4:16568228-16569170 REVERSE	25200.3	28054.2
Brapa_ESTC000808	AT3G02230	Symbols: ATRGP1, ATRGP, RGP1 | RGP1 (REVERSIBLY GLYCOSYLATED POLYPEPTIDE 1) | chr3:415470-417311 FORWARD	1742.37	2035.93
Brapa_ESTC000809	AT5G67600	Symbols: | similar to proline-rich family protein [Arabidopsis thaliana] (TAIR:AT3G49840.1); similar to XYPPX repeat [Medicago truncatula] (GB:ABE79588.1); contains InterPro domain XYPPX repeat; (InterPro:IPR006031) | chr5:26976980-26977452 REVERSE	2992.51	922.059
Brapa_ESTC000810	AT5G53350	Symbols: CLPX | CLPX (Clp protease regulatory subunit X); ATPase | chr5:21661286-21664729 FORWARD	1068.56	724.893
Brapa_ESTC000812	AT4G27652	Symbols: | similar to unknown protein [Arabidopsis thaliana] (TAIR:AT4G27657.1) | chr4:13809951-13810163 FORWARD	2570.22	913.898
Brapa_ESTC000813	AT3G15510	Symbols: ANAC056, ATNAC2 | ATNAC2 (Arabidopsis thaliana NAC domain containing protein 2); transcription factor | chr3:5243703-5245044 FORWARD	297.586	44.0116
Brapa_ESTC000814	AT1G70270	Symbols: | contains InterPro domain Helix-loop-helix DNA-binding; (InterPro:IPR011598) | chr1:26468090-26468350 FORWARD	3133.4	1748.84
Brapa_ESTC000815	no_hits_f	---------	1155.02	1903.03
Brapa_ESTC000816	AT1G15690	Symbols: ATAVP3, AVP-3, AVP1 | AVP1 (vacuolar-type H+-pumping pyrophosphatase 1); ATPase | chr1:5399110-5402180 FORWARD	5490.87	2605.64
Brapa_ESTC000817	AT5G64460	Symbols: | similar to unknown protein [Arabidopsis thaliana] (TAIR:AT1G58280.1); similar to phosphoglycerate mutase-like protein [Glycine max] (GB:AAG38144.1); contains InterPro domain Phosphoglycerate mutase; (InterPro:IPR013078) | chr5:25790235-25792330 REVERSE	3475.39	9247.29
Brapa_ESTC000818	AT1G16810	Symbols: | similar to CGI-144-like protein [Solanum lycopersicum] (GB:CAC81814.1); similar to Os02g0727500 [Oryza sativa (japonica cultivar-group)] (GB:NP_001047997.1); contains domain FAMILY NOT NAMED (PTHR13282); contains domain gb def: F6I1.17 protein (F17F16.8/F17F16.8) (Hypothetical protein) (At1g16810/F17F16.8) (PTHR13282:SF1) | chr1:5756143-5756687 FORWARD	19978.8	22973.1
Brapa_ESTC000819	AT1G10290	Symbols: DRP2A, ADL6 | ADL6 (DYNAMIN-LIKE PROTEIN 6) | chr1:3370776-3377122 FORWARD	1630.88	823.092
Brapa_ESTC000820	AT1G52827	| Symbols: | unknown protein | chr1:19675193-19675528 REVERSE	1657.88	2613.92
Brapa_ESTC000821	AT1G02205	| Symbols: CER1 | CER1 (ECERIFERUM 1) | chr1:418818-422154 FORWARD	233.8	397.402
Brapa_ESTC000822	AT3G63000	Symbols: NPL41 | NPL4 family protein | chr3:23294811-23296332 FORWARD	3035.12	2094.67
Brapa_ESTC000823	AT2G03740	Symbols: | late embryogenesis abundant domain-containing protein / LEA domain-containing protein | chr2:1142938-1143914 REVERSE	9.3611	9.7502
Brapa_ESTC000824	AT3G07680	Symbols: | emp24/gp25L/p24 family protein | chr3:2455633-2456658 FORWARD	5415.12	8416.35
Brapa_ESTC000825	AT3G13480	Symbols: | similar to unknown protein [Arabidopsis thaliana] (TAIR:AT1G55475.1); similar to Os03g0795100 [Oryza sativa (japonica cultivar-group)] (GB:NP_001051545.1) | chr3:4393191-4393819 REVERSE	4272.99	6482.25
Brapa_ESTC000826	AT3G57690	Symbols: AGP23, ATAGP23 | AGP23 (ARABINOGALACTAN-PROTEIN 23) | chr3:21395246-21395431 FORWARD	1440.78	1430.74
Brapa_ESTC000827	AT5G57060	Symbols: | similar to unknown protein [Arabidopsis thaliana] (TAIR:AT4G26060.1); similar to conserved hypothetical protein [Medicago truncatula] (GB:ABE79016.1); contains domain 60S RIBOSOMAL PROTEIN L18A (PTHR10052); contains domain 60S RIBOSOMAL PROTEIN L18A, PLANT (PTHR10052:SF2) | chr5:23107892-23109022 FORWARD	12255.9	12133.2
Brapa_ESTC000828	AT1G66850	Symbols: | protease inhibitor/seed storage/lipid transfer protein (LTP) family protein | chr1:24940648-24940956 FORWARD	6.6206	8.8816
Brapa_ESTC000829	no_hits_f	---------	2432.21	11990.5
Brapa_ESTC000830	AT5G63400	Symbols: ADK1 | ADK1 (ADENYLATE KINASE 1); adenylate kinase | chr5:25410500-25412043 REVERSE	4897.32	5078.7
Brapa_ESTC000831	AT1G55330	Symbols: ATAGP21, AGP21 | AGP21 (ARABINOGALACTAN PROTEIN 21) | chr1:20652300-20652476 REVERSE	7547.58	10424.7
Brapa_ESTC000832	no_hits_f	---------	363.373	2349.14
Brapa_ESTC000833	AT5G66180	Symbols: | similar to NOL1/NOP2/sun family protein [Arabidopsis thaliana] (TAIR:AT1G06560.1); similar to hypothetical protein MtrDRAFT_AC148217g15v1 [Medicago truncatula] (GB:ABE88184.1); contains InterPro domain Bacterial Fmu (Sun)/eukaryotic nucleolar NOL1/Nop2p; (InterPro:IPR001678) | chr5:26466178-26468145 FORWARD	398.305	645.795
Brapa_ESTC000834	AT3G62250	Symbols: UBQ5 | UBQ5 (UBIQUITIN 5); protein binding | chr3:23048113-23048586 FORWARD	19147.2	8443.35
Brapa_ESTC000835	AT2G13360	Symbols: AGT1, AGT | AGT (ALANINE:GLYOXYLATE AMINOTRANSFERASE) | chr2:5546499-5547984 REVERSE	25547.6	27237.4
Brapa_ESTC000836	AT3G27330	Symbols: | zinc finger (C3HC4-type RING finger) family protein | chr3:10118187-10121753 REVERSE	76.9545	66.1195
Brapa_ESTC000837	AT5G44300	Symbols: | dormancy/auxin associated family protein | chr5:17862598-17863406 REVERSE	14.1877	16.7624
Brapa_ESTC000838	AT1G69440	Symbols: ZIP, AGO7 | AGO7 (ARGONAUTE7) | chr1:26105228-26108679 REVERSE	237.448	259.178
Brapa_ESTC000839	AT4G04460	Symbols: | aspartyl protease family protein | chr4:2225230-2227744 FORWARD	229.65	215.569
Brapa_ESTC000840	AT1G19180	Symbols: | similar to unknown protein [Arabidopsis thaliana] (TAIR:AT1G74950.1); similar to PnFL-2 [Ipomoea nil] (GB:AAG49896.1); similar to Os07g0615200 [Oryza sativa (japonica cultivar-group)] (GB:NP_001060268.1); contains InterPro domain ZIM; (InterPro:IPR010399) | chr1:6622699-6623262 FORWARD	443.598	69.2996
Brapa_ESTC000841	AT3G16470	Symbols: JR1 | JR1 (Jacalin lectin family protein) | chr3:5596102-5597715 REVERSE	99.5437	56.7028
Brapa_ESTC000842	AT1G20130	Symbols: | family II extracellular lipase, putative | chr1:6978101-6985306 FORWARD	7.2401	7.0512
Brapa_ESTC000843	AT4G27650	Symbols: PEL1 | PEL1 (PELOTA); translation release factor | chr4:13803465-13807562 REVERSE	960.423	2507.93
Brapa_ESTC000844	AT5G30510	Symbols: ARRPS1, RPS1 | RPS1 (ribosomal protein S1); RNA binding | chr5:11636492-11638453 REVERSE	14317.8	19545.2
Brapa_ESTC000845	AT2G18600	Symbols: | RUB1-conjugating enzyme, putative | chr2:8080419-8081647 REVERSE	9561.82	16608.1
Brapa_ESTC000846	AT4G26850	Symbols: VTC2 | VTC2 (VITAMIN C DEFECTIVE 2) | chr4:13499268-13501151 REVERSE	2607.91	1716.99
Brapa_ESTC000847	AT1G07230	Symbols: | phosphoesterase family protein | chr1:2220508-2222777 REVERSE	284.824	102.041
Brapa_ESTC000848	AT1G25420	Symbols: | similar to unknown protein [Arabidopsis thaliana] (TAIR:AT1G34220.2); similar to hypothetical protein [Solanum tuberosum] (GB:BAE46414.1); similar to Os08g0175200 [Oryza sativa (japonica cultivar-group)] (GB:NP_001061111.1); similar to Os01g0687700 [Oryza sativa (japonica cultivar-group)] (GB:NP_001043915.1); contains InterPro domain Protein of unknown function DUF292, eukaryotic; (Int…	1058.15	640.443
Brapa_ESTC000849	AT1G12100	Symbols: | protease inhibitor/seed storage/lipid transfer protein (LTP) family protein | chr1:4095496-4095843 FORWARD	114.535	229.731
Brapa_ESTC000850	no_hits_f	---------	162.471	295.866
Brapa_ESTC000851	AT2G34250	| Symbols: | protein translocase | chr2:14469714-14471651 FORWARD	255.29	429.782
Brapa_ESTC000852	AT1G24050	Symbols: | similar to unknown protein [Arabidopsis thaliana] (TAIR:AT1G70220.1); similar to hypothetical protein Afu6g08070 [Asper (GB:XP_750698.1); similar to Os02g0741900 [Oryza sativa (japonica cultivar-group)] (GB:NP_001048085.1); contains domain FAMILY NOT NAMED (PTHR13542); contains domain SUBFAMILY NOT NAMED (PTHR13542:SF2) | chr1:8507046-8508428 FORWARD	4543.46	7477.77
Brapa_ESTC000854	AT5G19855	Symbols: | similar to Os03g0807900 [Oryza sativa (japonica cultivar-group)] (GB:NP_001051646.1); similar to chaperonin-like RbcX [Trichodesmium erythraeum IMS101] (GB:YP_723870.1); similar to Os07g0569600 [Oryza sativa (japonica cultivar-group)] (GB:NP_001060039.1) | chr5:6712168-6713447 REVERSE	1647.41	12642.2
Brapa_ESTC000855	AT5G55190	Symbols: RAN3 | RAN3; GTP binding | chr5:22409511-22411183 FORWARD	5547.39	6150.18
Brapa_ESTC000856	AT4G14455	Symbols: ATBS14B | ATBS14B; protein transporter/ v-SNARE | chr4:8310478-8311934 FORWARD	907.31	2267.09
Brapa_ESTC000857	AT1G20696	Symbols: NFD3, NFD03, HMGB3 | HMGB3 (HIGH MOBILITY GROUP B 3); transcription factor | chr1:7179815-7181164 FORWARD	51956.9	55654.4
Brapa_ESTC000858	AT2G03440	| Symbols: | nodulin-related | chr2:1039406-1039969 REVERSE	3051.06	5229.79
Brapa_ESTC000859	no_hits_f	---------	118.766	244.303
Brapa_ESTC000860	AT4G33640	Symbols: | similar to hypothetical protein MtrDRAFT_AC148971g9v1 [Medicago truncatula] (GB:ABD28547.1); similar to Os03g0690000 [Oryza sativa (japonica cultivar-group)] (GB:NP_001050950.1); contains domain SUBFAMILY NOT NAMED (PTHR22739:SF6); contains domain FAMILY NOT NAMED (PTHR22739) | chr4:16159730-16160214 REVERSE	3030.29	1779.17
Brapa_ESTC000861	AT1G31650	Symbols: ATROPGEF14, ROPGEF14 | ATROPGEF14/ROPGEF14 (KINASE PARTNER PROTEIN-LIKE); Rho guanyl-nucleotide exchange factor | chr1:11326455-11329748 REVERSE	3114.08	9056.71
Brapa_ESTC000862	AT2G36885	Symbols: | similar to Os03g0137600 [Oryza sativa (japonica cultivar-group)] (GB:NP_001048903.1); similar to unknown [Sorghum bicolor] (GB:ABE77193.1); contains domain no description (G3D.1.20.20.10) | chr2:15489246-15490755 REVERSE	225.868	1433.66
Brapa_ESTC000863	AT5G46210	Symbols: CUL4 | CUL4 (CULLIN4); protein binding / ubiquitin-protein ligase | chr5:18748796-18753880 REVERSE	6470.69	5854.92
Brapa_ESTC000864	AT3G51590	Symbols: LTP12 | LTP12 (LIPID TRANSFER PROTEIN 12); lipid binding | chr3:19146807-19147633 REVERSE	16.9126	15.5352
Brapa_ESTC000865	AT2G44670	Symbols: | senescence-associated protein-related | chr2:18432354-18432748 FORWARD	749.784	932.408
Brapa_ESTC000866	AT3G48140	Symbols: | senescence-associated protein, putative | chr3:17789456-17790284 FORWARD	28789.4	25396.5
Brapa_ESTC000867	AT4G27720	Symbols: | similar to unknown protein [Arabidopsis thaliana] (TAIR:AT1G64650.1); similar to unknown protein [Arabidopsis thaliana] (TAIR:AT3G49310.1); similar to expressed protein [Oryza sativa (japonica cultivar-group)] (GB:ABF93637.1); similar to Os10g0519600 [Oryza sativa (japonica cultivar-group)] (GB:NP_001065080.1); similar to Major Facilitator Superfamily protein, expressed [Oryza sativa (…	17139.1	9796.22
Brapa_ESTC000868	AT3G08610	Symbols: | similar to hypothetical protein MtrDRAFT_AC136139g5v1 [Medicago truncatula] (GB:ABE93033.1) | chr3:2616441-2616774 REVERSE	3545.88	5041.93
Brapa_ESTC000869	no_hits_f	---------	18163.6	34960.2
Brapa_ESTC000870	AT1G05205	Symbols: | similar to unknown protein [Oryza sativa (japonica cultivar-group)] (GB:BAD45491.1) | chr1:1509351-1510248 REVERSE	3754.22	8032.36
Brapa_ESTC000871	no_hits_f	---------	238.27	367.416
Brapa_ESTC000872	AT1G07040	Symbols: | similar to unknown protein [Arabidopsis thaliana] (TAIR:AT1G27030.1); similar to unknown protein [Oryza sativa (japonica cultivar-group)] (GB:AAN05517.1); similar to Os10g0463800 [Oryza sativa (japonica cultivar-group)] (GB:NP_001064789.1) | chr1:2161224-2163034 REVERSE	6659.4	1217.09
Brapa_ESTC000873	AT2G32060	Symbols: | 40S ribosomal protein S12 (RPS12C) | chr2:13646305-13647181 REVERSE	17050.8	28264.8
Brapa_ESTC000875	AT3G11410	Symbols: ATPP2CA, AHG3 | AHG3/ATPP2CA (ARABIDOPSIS THALIANA PROTEIN PHOSPHATASE 2CA); protein binding / protein phosphatase type 2C | chr3:3584187-3585655 REVERSE	439.262	194.728
Brapa_ESTC000876	AT2G37700	| Symbols: | CER1 protein, putative | chr2:15818719-15821254 REVERSE	7.5512	8.4518
Brapa_ESTC000877	no_hits_f	---------	127.567	228.959
Brapa_ESTC000878	AT1G77510	Symbols: ATPDIL1-2 | ATPDIL1-2 (PDI-LIKE 1-2); protein disulfide isomerase | chr1:29131636-29134327 FORWARD	3866.42	2703.47
Brapa_ESTC000879	AT5G05010	Symbols: | clathrin adaptor complexes medium subunit-related | chr5:1477138-1479873 FORWARD	14747.8	21076.1
Brapa_ESTC000880	AT1G69690	Symbols: | TCP family transcription factor, putative | chr1:26220112-26221089 FORWARD	107.82	598.134
Brapa_ESTC000882	AT1G31800	Symbols: CYP97A3, LUT5 | CYP97A3/LUT5 (CYTOCHROME P450-TYPE MONOOXYGENASE 97A3); carotene beta-ring hydroxylase/ oxygen binding | chr1:11396421-11399451 FORWARD	173.688	444.617
Brapa_ESTC000883	AT1G10650	Symbols: | protein binding / zinc ion binding | chr1:3524123-3525319 REVERSE	12108.8	10887
Brapa_ESTC000884	AT5G60540	Symbols: EMB2407, ATPDX2, PDX2 | ATPDX2/EMB2407/PDX2 (PYRIDOXINE BIOSYNTHESIS 2); glutaminase/ glutamyl-tRNA(Gln) amidotransferase/ protein heterodimerization | chr5:24354100-24355873 REVERSE	73.1619	89.6886
Brapa_ESTC000885	AT5G24650	Symbols: | mitochondrial import inner membrane translocase subunit Tim17/Tim22/Tim23 family protein | chr5:8437126-8438862 FORWARD	2842.17	2935.65
Brapa_ESTC000886	no_hits_f	---------	45.3795	112.402
Brapa_ESTC000887	AT3G03960	| Symbols: | chaperonin, putative | chr3:1024439-1027611 FORWARD	6810.88	4822.58
Brapa_ESTC000888	AT5G13220	Symbols: | similar to unknown protein [Arabidopsis thaliana] (TAIR:AT1G19180.1); similar to P0482D04.10 [Oryza sativa (japonica cultivar-group)] (GB:BAB89663.1); similar to Os04g0395800 [Oryza sativa (japonica cultivar-group)] (GB:NP_001052661.1); contains InterPro domain ZIM; (InterPro:IPR010399) | chr5:4219004-4219999 FORWARD	155.726	219.078
Brapa_ESTC000889	AT2G26670	Symbols: ATHO1, HO1, TED 4, GUN2, HY6, HY1 | HY1 (HEME OXYGENASE 1) | chr2:11348894-11350472 FORWARD	4230.51	3099.9
Brapa_ESTC000890	AT2G14045	Symbols: | similar to unnamed protein product [Tetraodon nigroviridis] (GB:CAF94409.1); similar to Os07g0185800 [Oryza sativa (japonica cultivar-group)] (GB:NP_001059067.1); contains domain ASSOCIATE OF C-MYC (AMY-1) (PTHR13168) | chr2:5914215-5915236 FORWARD	2900.91	6680.49
Brapa_ESTC000891	AT3G05020	Symbols: ACP, ACP1 | ACP1 (ACYL CARRIER PROTEIN 1) | chr3:1391869-1392884 REVERSE	351.703	223.101
Brapa_ESTC000892	AT4G32460	Symbols: | similar to unknown protein [Arabidopsis thaliana] (TAIR:AT5G11420.1); similar to unknown [Ricinus communis] (GB:CAB02653.1); contains InterPro domain Galactose-binding like; (InterPro:IPR008979); contains InterPro domain Protein of unknown function DUF642; (InterPro:IPR006946) | chr4:15663042-15664865 REVERSE	752.207	791.247
Brapa_ESTC000893	AT3G59070	Symbols: | auxin-responsive protein, putative | chr3:21843341-21845491 REVERSE	350.965	193.03
Brapa_ESTC000894	AT2G40380	Symbols: | prenylated rab acceptor (PRA1) family protein | chr2:16871812-16872453 REVERSE	3534.3	2816.82
Brapa_ESTC000895	no_hits_f	---------	1696.73	1249.12
Brapa_ESTC000896	AT4G35830	Symbols: | aconitate hydratase, cytoplasmic / citrate hydro-lyase / aconitase (ACO) | chr4:16973011-16977953 REVERSE	3779.89	4166.1
Brapa_ESTC000897	AT5G27740	Symbols: | nucleoside-triphosphatase/ nucleotide binding | chr5:9823835-9826873 FORWARD	1291.4	1102.2
Brapa_ESTC000898	AT5G65270	Symbols: AtRABA4a | AtRABA4a (Arabidopsis Rab GTPase homolog A4a); GTP binding | chr5:26100663-26101776 FORWARD	578.731	725.808
Brapa_ESTC000899	AT2G37340	Symbols: ATRSZ33, RSZ33 | RSZ33 (Arginine/serine-rich Zinc knuckle-containing protein 33); nucleic acid binding / nucleotide binding / zinc ion binding | chr2:15677451-15679410 REVERSE	18122.6	5125.9
Brapa_ESTC000900	no_hits_f	---------	307.194	261.768
Brapa_ESTC000901	no_hits_f	---------	6129.25	4998.12
Brapa_ESTC000902	AT5G09450	Symbols: | pentatricopeptide (PPR) repeat-containing protein | chr5:2941865-2943325 FORWARD	1222.38	1628.96
Brapa_ESTC000903	AT5G62000	Symbols: ARF1-BP, ARF2 | ARF2 (AUXIN RESPONSE FACTOR 2) | chr5:24928085-24931906 FORWARD	4091.81	3303.41
Brapa_ESTC000904	AT2G36910	Symbols: PGP1, ATMDR1 | ATPGP1 (ARABIDOPSIS THALIANA P GLYCOPROTEIN1); calmodulin binding | chr2:15509241-15514129 FORWARD	9020.81	7445.08
Brapa_ESTC000905	AT2G24330	Symbols: | Identical to Hypothetical protein At2g24330 [Arabidopsis Thaliana] (GB:Q9ZQ34); similar to unknown protein [Arabidopsis thaliana] (TAIR:AT4G31080.1); similar to Os02g0631000 [Oryza sativa (japonica cultivar-group)] (GB:NP_001047497.1); similar to Os04g0672900 [Oryza sativa (japonica cultivar-group)] (GB:NP_001054229.1); similar to H0322F07.6 [Oryza sativa (indica cultivar-group)] (GB:C…	10248.9	9856.67
Brapa_ESTC000906	AT1G76405	Symbols: | similar to unknown protein [Arabidopsis thaliana] (TAIR:AT1G20816.1); similar to chloroplast channel forming outer membrane protein [Pisum sativum] (GB:CAB58442.1) | chr1:28666888-28668567 FORWARD	2623.06	6912.15
Brapa_ESTC000907	AT3G52090	Symbols: ATRPB13.6 | ATRPB13.6 (Arabidopsis thaliana RNA polymerase II 13.6 kDa subunit); DNA binding / DNA-directed RNA polymerase | chr3:19329047-19329976 REVERSE	1574.67	1414.57
Brapa_ESTC000908	AT1G03630	Symbols: PORC, POR C | POR C (PROTOCHLOROPHYLLIDE OXIDOREDUCTASE); oxidoreductase/ protochlorophyllide reductase | chr1:907698-909244 FORWARD	1444.34	7105.91
Brapa_ESTC000909	no_hits_f	---------	510.363	844.674
Brapa_ESTC000910	AT1G03370	Symbols: | C2 domain-containing protein / GRAM domain-containing protein | chr1:827182-834996 FORWARD	119.98	153.935
Brapa_ESTC000911	AT5G22875	Symbols: | similar to Os04g0165500 [Oryza sativa (japonica cultivar-group)] (GB:NP_001052133.1); similar to hypothetical protein [Ipomoea trifida] (GB:AAS79573.1) | chr5:7651310-7651606 FORWARD	28870.6	25238.3
Brapa_ESTC000912	AT5G18620	Symbols: CHR17 | CHR17 (CHROMATIN REMODELING FACTOR17); DNA-dependent ATPase | chr5:6196192-6202060 REVERSE	320.733	204.546
Brapa_ESTC000913	AT5G24810	| Symbols: | ABC1 family protein | chr5:8516905-8522619 REVERSE	1294.4	598.958
Brapa_ESTC000914	AT5G23940	Symbols: EMB3009 | EMB3009 (EMBRYO DEFECTIVE 3009); transferase | chr5:8076619-8079680 REVERSE	1583.62	1153.55
Brapa_ESTC000915	AT5G63890	Symbols: ATHDH | ATHDH (HISTIDINOL DEHYDROGENASE) | chr5:25582826-25585330 REVERSE	1349.17	1420.65
Brapa_ESTC000916	AT5G59970	| Symbols: | histone H4 | chr5:24163578-24163889 REVERSE	1321.16	1542.22
Brapa_ESTC000917	AT2G25625	Symbols: | similar to Os05g0575000 [Oryza sativa (japonica cultivar-group)] (GB:NP_001056395.1) | chr2:10913640-10914177 FORWARD	427.126	299.696
Brapa_ESTC000918	AT1G76400	Symbols: | ribophorin I family protein | chr1:28663607-28666566 REVERSE	3839.02	8949.72
Brapa_ESTC000919	AT1G32790	Symbols: CID11 | CID11; RNA binding / protein binding | chr1:11875154-11877168 REVERSE	2541.02	1914.82
Brapa_ESTC000920	AT4G27960	Symbols: UBC9 | UBC9 (UBIQUITIN CONJUGATING ENZYME 9); ubiquitin-protein ligase | chr4:13916071-13917299 REVERSE	4889.96	2387.57
Brapa_ESTC000921	AT4G17840	Symbols: | similar to unknown protein [Arabidopsis thaliana] (TAIR:AT2G35260.1); similar to hypothetical protein 23.t00040 [Brassica oleracea] (GB:ABD65626.1); similar to hypothetical protein 40.t00061 [Brassica oleracea] (GB:ABD65174.1) | chr4:9918235-9920203 REVERSE	6512.44	6580.96
Brapa_ESTC000923	AT5G13300	Symbols: VAN3, SFC | SFC (SCARFACE, VASCULAR NETWORK DEFECTIVE 3) | chr5:4255926-4262021 REVERSE	8221.73	7466.46
Brapa_ESTC000924	AT1G80260	Symbols: EMB1427 | EMB1427 (EMBRYO DEFECTIVE 1427); tubulin binding | chr1:30180816-30185403 FORWARD	173.53	225.4
Brapa_ESTC000925	AT4G22380	Symbols: | ribosomal protein L7Ae/L30e/S12e/Gadd45 family protein | chr4:11812053-11812934 REVERSE	23589.9	20273.7
Brapa_ESTC000926	AT3G13300	Symbols: VCS | VCS (VARICOSE); nucleotide binding | chr3:4304092-4309956 FORWARD	182.62	159.746
Brapa_ESTC000927	AT4G35905	Symbols: | similar to Protein of unknown function DUF343 [Medicago truncatula] (GB:ABE93448.1); contains InterPro domain Protein of unknown function DUF343; (InterPro:IPR005651) | chr4:17007287-17008070 REVERSE	1403.66	2871.64
Brapa_ESTC000928	AT4G14420	Symbols: | lesion inducing protein-related | chr4:8302167-8303734 REVERSE	7790.67	12021.1
Brapa_ESTC000929	no_hits_f	---------	2994.28	8669.64
Brapa_ESTC000930	AT4G02150	Symbols: MOS6, ATIMPALPHA3 | ATIMPALPHA3/MOS6; protein transporter | chr4:950884-953602 REVERSE	528.647	355.864
Brapa_ESTC000931	AT3G51590	Symbols: LTP12 | LTP12 (LIPID TRANSFER PROTEIN 12); lipid binding | chr3:19146807-19147633 REVERSE	57.9876	68.2368
Brapa_ESTC000932	AT3G45030	Symbols: | 40S ribosomal protein S20 (RPS20A) | chr3:16482591-16483297 REVERSE	16626.4	21775
Brapa_ESTC000933	AT3G57610	Symbols: ATPURA | adenylosuccinate synthetase (ADSS) | chr3:21345496-21347580 REVERSE	3011.07	2491.25
Brapa_ESTC000934	AT1G69260	Symbols: | similar to unknown protein [Arabidopsis thaliana] (TAIR:AT1G13740.1); similar to Os07g0602900 [Oryza sativa (japonica cultivar-group)] (GB:NP_001060209.1); similar to expressed protein [Oryza sativa (japonica cultivar-group)] (GB:ABF94628.1); similar to Os03g0419100 [Oryza sativa (japonica cultivar-group)] (GB:NP_001050378.1); contains InterPro domain Protein of unknown function DUF167…	4876.63	4210.2
Brapa_ESTC000935	AT5G18820	Symbols: EMB3007 | EMB3007 (EMBRYO DEFECTIVE 3007); ATP binding / protein binding / unfolded protein binding | chr5:6271551-6274155 FORWARD	222.439	394.231
Brapa_ESTC000936	AT3G63095	Symbols: | Encodes a Protease inhibitor/seed storage/LTP family protein | chr3:23326481-23327233 FORWARD	296.731	1041.06
Brapa_ESTC000937	AT1G74640	Symbols: | similar to unknown protein [Oryza sativa (japonica cultivar-group)] (GB:BAD28539.1); contains domain no description (G3D.3.40.50.1820); contains domain alpha/beta-Hydrolases (SSF53474) | chr1:28036510-28038320 FORWARD	789.625	723.6
Brapa_ESTC000938	AT1G63380	Symbols: | short-chain dehydrogenase/reductase (SDR) family protein | chr1:23509306-23510169 FORWARD	1777.14	1946.84
Brapa_ESTC000939	AT4G39710	Symbols: | immunophilin, putative / FKBP-type peptidyl-prolyl cis-trans isomerase, putative | chr4:18427243-18428319 REVERSE	222.085	8684.77
Brapa_ESTC000940	AT2G34630	Symbols: GPPS, GPS1 | GPPS (GERANYLPYROPHOSPHATE SYNTHASE); dimethylallyltranstransferase | chr2:14585768-14588711 FORWARD	66.7353	867.91
Brapa_ESTC000941	AT2G12400	Symbols: | similar to unknown protein [Arabidopsis thaliana] (TAIR:AT2G25270.1); similar to H0306F03.12 [Oryza sativa (indica cultivar-group)] (GB:CAH68245.1); similar to Os04g0644000 [Oryza sativa (japonica cultivar-group)] (GB:NP_001054054.1); similar to Os02g0799300 [Oryza sativa (japonica cultivar-group)] (GB:NP_001048408.1) | chr2:5012226-5015222 REVERSE	3561.68	1386.86
Brapa_ESTC000942	AT3G25520	Symbols: ATL5 | ATL5 (A. THALIANA RIBOSOMAL PROTEIN L5); structural constituent of ribosome | chr3:9270810-9272564 REVERSE	24822.1	29285.5
Brapa_ESTC000943	AT4G00810	Symbols: | 60S acidic ribosomal protein P1 (RPP1B) | chr4:346179-346957 REVERSE	50405.9	62211.4
Brapa_ESTC000944	AT1G72630	Symbols: ELF4-L2 | similar to unknown protein [Arabidopsis thaliana] (TAIR:AT1G17455.1); similar to Os11g0621500 [Oryza sativa (japonica cultivar-group)] (GB:NP_001068300.1); similar to hypothetical protein [Oryza sativa] (GB:AAD27669.1); contains InterPro domain Protein of unknown function DUF1313; (InterPro:IPR009741) | chr1:27348650-27349009 FORWARD	4358.48	6955.13
Brapa_ESTC000945	AT1G17880	Symbols: | nascent polypeptide-associated complex (NAC) domain-containing protein / BTF3b-like transcription factor, putative | chr1:6152565-6153418 REVERSE	680.881	110.185
Brapa_ESTC000946	AT1G80740	Symbols: CMT1 | CMT1 (CHROMOMETHYLASE 1); DNA binding | chr1:30347286-30351723 FORWARD	50.375	67.4681
Brapa_ESTC000947	AT1G53170	Symbols: ATERF-8, ATERF8 | ATERF-8/ATERF8 (ETHYLENE RESPONSE ELEMENT BINDING FACTOR 4); DNA binding / transcription factor/ transcriptional repressor | chr1:19825207-19825764 REVERSE	1073.8	4450.03
Brapa_ESTC000948	AT2G22125	| Symbols: | binding | chr2:9413873-9421303 FORWARD	1405.77	871.159
Brapa_ESTC000949	AT4G09750	Symbols: | short-chain dehydrogenase/reductase (SDR) family protein | chr4:6146767-6148695 FORWARD	404.02	811.784
Brapa_ESTC000950	AT1G20130	Symbols: | family II extracellular lipase, putative | chr1:6978101-6985306 FORWARD	36.1249	44.8583
Brapa_ESTC000951	AT2G19740	Symbols: | 60S ribosomal protein L31 (RPL31A) | chr2:8520659-8521428 FORWARD	43430.4	40581.9
Brapa_ESTC000952	AT1G18540	Symbols: | 60S ribosomal protein L6 (RPL6A) | chr1:6377441-6378541 REVERSE	6069.9	9777.02
Brapa_ESTC000953	AT3G26000	| Symbols: | F-box family protein | chr3:9508279-9509779 REVERSE	14843.8	13051.5
Brapa_ESTC000954	AT4G02060	Symbols: MCM7, PRL | PRL (PROLIFERA); ATP binding / DNA binding / DNA-dependent ATPase | chr4:901484-905297 FORWARD	376.468	590.686
Brapa_ESTC000955	AT5G43100	Symbols: | aspartyl protease family protein | chr5:17316492-17319946 FORWARD	3249.37	2285.24
Brapa_ESTC000956	AT5G54810	Symbols: TRPB, TRP2, TSB1 | TSB1 (TRYPTOPHAN SYNTHASE BETA-SUBUNIT) | chr5:22282031-22283964 REVERSE	1438.24	813.041
Brapa_ESTC000957	AT5G11200	Symbols: | DEAD/DEAH box helicase, putative | chr5:3567390-3570687 FORWARD	22826	22522.1
Brapa_ESTC000958	AT1G77140	Symbols: ATVPS45, VPS45 | VPS45 (VACUOLAR PROTEIN SORTING 45); protein transporter | chr1:28989057-28992575 FORWARD	225.626	183.806
Brapa_ESTC000959	AT5G13720	Symbols: | structural constituent of ribosome | chr5:4427963-4429032 FORWARD	3692.52	1297.42
Brapa_ESTC000960	AT1G76900	Symbols: AtTLP1 | AtTLP1 (TUBBY LIKE PROTEIN 1); phosphoric diester hydrolase/ transcription factor | chr1:28887635-28889271 FORWARD	259.505	66.5424
Brapa_ESTC000961	AT1G69500	| Symbols: | oxygen binding | chr1:26127623-26129572 FORWARD	15.1281	26.8032
Brapa_ESTC000962	AT5G16920	Symbols: | similar to unknown protein [Arabidopsis thaliana] (TAIR:AT5G26730.1); similar to Os12g0233900 [Oryza sativa (japonica cultivar-group)] (GB:NP_001066453.1); contains InterPro domain Beta-Ig-H3/fasciclin; (InterPro:IPR000782) | chr5:5567087-5567857 FORWARD	10.8711	11.5053
Brapa_ESTC000963	AT2G27510	Symbols: ATFD3 | ATFD3 (FERREDOXIN 3); electron carrier | chr2:11765359-11765826 REVERSE	787.762	183.982
Brapa_ESTC000964	no_hits_f	---------	57.5342	58.831
Brapa_ESTC000965	AT1G06280	Symbols: LBD2 | LOB domain family protein / lateral organ boundaries domain family protein (LBD2) | chr1:1920326-1920946 REVERSE	196.261	379.173
Brapa_ESTC000966	AT1G72020	Symbols: | similar to OSJNBa0084A10.18 [Oryza sativa (japonica cultivar-group)] (GB:CAE03043.3); similar to Os04g0432600 [Oryza sativa (japonica cultivar-group)] (GB:NP_001052832.1) | chr1:27113183-27113989 REVERSE	1511.56	2400.35
Brapa_ESTC000967	AT5G04800	Symbols: | structural constituent of ribosome | chr5:1389218-1389643 FORWARD	12298.1	9708.06
Brapa_ESTC000968	AT1G32490	Symbols: EMB2733, ESP3 | EMB2733/ESP3 (EMBRYO DEFECTIVE 2733); ATP-dependent RNA helicase | chr1:11742336-11749266 REVERSE	730.356	740.32
Brapa_ESTC000970	AT3G16140	Symbols: PSAH-1 | PSAH-1 (photosystem I subunit H-1) | chr3:5468676-5469421 REVERSE	3570.92	7540.53
Brapa_ESTC000971	AT3G48610	Symbols: | phosphoesterase family protein | chr3:18022638-18024944 REVERSE	420.816	1908.23
Brapa_ESTC000972	AT1G20060	Symbols: | kinesin motor protein-related | chr1:6950714-6956284 REVERSE	161.946	128.788
Brapa_ESTC000973	AT2G20120	Symbols: COV1 | COV1 (CONTINUOUS VASCULAR RING) | chr2:8694649-8696402 REVERSE	1525.24	1483.56
Brapa_ESTC000974	AT4G14880	Symbols: CYTACS1, ATCYS-3A, OASA1 | OASA1 (O-ACETYLSERINE (THIOL) LYASE (OAS-TL) ISOFORM A1) | chr4:8518204-8520045 REVERSE	2384.28	4304.6
Brapa_ESTC000975	AT5G14910	Symbols: | heavy-metal-associated domain-containing protein | chr5:4823818-4825199 FORWARD	2099.68	11014.7
Brapa_ESTC000976	AT5G02550	| Symbols: | unknown protein | chr5:573245-573475 REVERSE	757.01	916.436
Brapa_ESTC000977	AT2G36530	Symbols: LOS2 | LOS2 (Low expression of osmotically responsive genes 1); phosphopyruvate hydratase | chr2:15328160-15330865 REVERSE	13484.1	6264.8
Brapa_ESTC000978	AT5G26730	Symbols: | similar to unknown protein [Arabidopsis thaliana] (TAIR:AT5G16920.1); similar to Os12g0233900 [Oryza sativa (japonica cultivar-group)] (GB:NP_001066453.1); contains domain FAS1 domain (SSF82153) | chr5:9300425-9301993 FORWARD	146.716	132.211
Brapa_ESTC000979	AT3G17780	Symbols: | similar to unknown protein [Arabidopsis thaliana] (TAIR:AT1G48440.1); similar to Os02g0734900 [Oryza sativa (japonica cultivar-group)] (GB:NP_001048043.1); similar to Os03g0240700 [Oryza sativa (japonica cultivar-group)] (GB:NP_001049510.1); similar to Erwinia induced protein 2 [Solanum tuberosum] (GB:AAO32066.1) | chr3:6087022-6088134 FORWARD	17326	19389.9
Brapa_ESTC000980	AT5G56680	Symbols: EMB2755 | EMB2755 (EMBRYO DEFECTIVE 2755); ATP binding / aminoacyl-tRNA ligase/ asparagine-tRNA ligase/ aspartate-tRNA ligase/ nucleic acid binding | chr5:22953871-22956067 FORWARD	7665.67	5883.83
Brapa_ESTC000981	AT1G14610	Symbols: VALRS, TWN2 | TWN2 (TWIN 2); ATP binding / aminoacyl-tRNA ligase | chr1:5008497-5014481 REVERSE	712.615	473.278
Brapa_ESTC000982	AT2G41960	Symbols: | similar to unknown protein [Arabidopsis thaliana] (TAIR:AT3G58050.1); similar to Os03g0226600 [Oryza sativa (japonica cultivar-group)] (GB:NP_001049440.1); similar to Os10g0105400 [Oryza sativa (japonica cultivar-group)] (GB:NP_001064024.1); similar to Unknown protein [Oryza sativa (japonica cultivar-group)] (GB:AAK00428.2) | chr2:17521322-17526093 REVERSE	296.343	160.57
Brapa_ESTC000983	AT2G18245	Symbols: | similar to unknown protein [Arabidopsis thaliana] (TAIR:AT3G19970.1); similar to Os06g0730300 [Oryza sativa (japonica cultivar-group)] (GB:NP_001058655.1); similar to integral membrane protein-like [Oryza sativa (japonica cultivar-group)] (GB:BAD62122.1); similar to Os02g0133900 [Oryza sativa (japonica cultivar-group)] (GB:NP_001045809.1); contains InterPro domain Protein of unknown fu…	977.161	925.61
Brapa_ESTC000984	no_hits_f	---------	8.6982	6.7946
Brapa_ESTC000986	AT3G47940	Symbols: | DNAJ heat shock protein, putative | chr3:17699217-17700387 REVERSE	887.083	462.823
Brapa_ESTC000987	AT4G37900	| Symbols: | glycine-rich protein | chr4:17821731-17824439 REVERSE	28.3849	33.3773
Brapa_ESTC000988	AT5G47930	Symbols: | 40S ribosomal protein S27 (RPS27D) | chr5:19423649-19424555 REVERSE	5305.34	8964.56
Brapa_ESTC000989	AT2G38280	Symbols: ATAMPD, FAC1 | FAC1 (EMBRYONIC FACTOR1); AMP deaminase | chr2:16040845-16045871 REVERSE	13802	6806.39
Brapa_ESTC000991	AT1G29950	Symbols: | similar to transcription factor/ transcription regulator [Arabidopsis thaliana] (TAIR:AT5G50010.1); similar to Helix-loop-helix DNA-binding [Medicago truncatula] (GB:ABE90109.1); contains InterPro domain Helix-loop-helix DNA-binding; (InterPro:IPR011598); contains InterPro domain Basic helix-loop-helix dimerisation region bHLH; (InterPro:IPR001092) | chr1:10493445-10494200 FORWARD	790.77	273.258
Brapa_ESTC000993	AT3G52880	Symbols: ATMDAR1 | ATMDAR1 (MONODEHYDROASCORBATE REDUCTASE 1); monodehydroascorbate reductase (NADH) | chr3:19612455-19615344 REVERSE	2381.77	6076.85
Brapa_ESTC000994	AT5G43990	Symbols: SUVR2 | SUVR2; histone-lysine N-methyltransferase/ zinc ion binding | chr5:17715750-17718960 FORWARD	243.224	927
Brapa_ESTC000995	AT5G62460	Symbols: | zinc finger (C3HC4-type RING finger) family protein | chr5:25092771-25094298 FORWARD	5557.37	1319.08
Brapa_ESTC000996	AT5G13360	Symbols: | auxin-responsive GH3 family protein | chr5:4283808-4286123 FORWARD	895.473	4498.75
Brapa_ESTC000997	AT4G11150	Symbols: EMB2448, TUFF, VHA-E1, TUF | TUF (VACUOLAR ATP SYNTHASE SUBUNIT E1) | chr4:6800087-6801692 FORWARD	14951.6	14626.8
Brapa_ESTC000998	AT2G05840	Symbols: PAA2 | PAA2 (20S proteasome alpha subunit A2); peptidase | chr2:2234223-2236050 FORWARD	8349.49	12164.7
Brapa_ESTC000999	AT5G66240	Symbols: | transducin family protein / WD-40 repeat family protein | chr5:26483574-26485427 FORWARD	1273.2	682.902
Brapa_ESTC001000	AT5G44280	Symbols: | protein binding / zinc ion binding | chr5:17853342-17856341 REVERSE	3270.57	6685.92
Brapa_ESTC001001	AT5G67230	Symbols: | glycosyl transferase family 43 protein | chr5:26839732-26841407 FORWARD	2017.3	2308.16
Brapa_ESTC001002	AT1G48410	| Symbols: AGO1 | AGO1 (ARGONAUTE 1) | chr1:17889953-17895560 REVERSE	4463.71	1914.73
Brapa_ESTC001003	AT5G37770	Symbols: CML24, TCH2 | TCH2 (TOUCH 2); calcium ion binding | chr5:15016305-15016790 REVERSE	25122.2	20324.6
Brapa_ESTC001005	AT3G03380	Symbols: DEGP7 | DEGP7 (DEGP PROTEASE 7); serine-type peptidase/ trypsin | chr3:799727-808326 FORWARD	51.5357	37.9438
Brapa_ESTC001006	AT3G05530	Symbols: ATS6A.2, RPT5A | RPT5A (regulatory particle triple-A 5A); ATPase/ calmodulin binding | chr3:1603546-1605999 FORWARD	8431.73	6080.63
Brapa_ESTC001007	AT2G03680	Symbols: SKU6, SPR1 | SPR1 (SPIRAL1) | chr2:1121395-1121847 FORWARD	14103.5	11835.9
Brapa_ESTC001008	AT4G27960	Symbols: UBC9 | UBC9 (UBIQUITIN CONJUGATING ENZYME 9); ubiquitin-protein ligase | chr4:13916071-13917299 REVERSE	956.12	318.115
Brapa_ESTC001009	AT5G56970	Symbols: ATCKX3, CKX3 | CKX3 (CYTOKININ OXIDASE 3); cytokinin dehydrogenase | chr5:23062170-23065471 REVERSE	70.4154	113.639
Brapa_ESTC001010	AT1G19000	Symbols: | myb family transcription factor | chr1:6561326-6562675 REVERSE	11.3367	14.5542
Brapa_ESTC001011	AT1G25450	Symbols: | very-long-chain fatty acid condensing enzyme, putative | chr1:8938666-8940269 REVERSE	2786.65	1398.77
Brapa_ESTC001012	AT2G30590	Symbols: WRKY21 | WRKY21 (WRKY DNA-binding protein 21); transcription factor | chr2:13040968-13042380 FORWARD	4574.36	5454.02
Brapa_ESTC001013	AT2G33040	Symbols: | ATP synthase gamma chain, mitochondrial (ATPC) | chr2:14026055-14028124 REVERSE	2410.95	5093.35
Brapa_ESTC001015	AT2G35610	Symbols: | similar to unknown protein [Arabidopsis thaliana] (TAIR:AT1G70630.1); similar to expressed protein [Oryza sativa (japonica cultivar-group)] (GB:ABF97349.1); contains InterPro domain Reticulon; (InterPro:IPR003388) | chr2:14954696-14958185 REVERSE	455.824	226.895
Brapa_ESTC001017	AT5G16110	Symbols: | similar to unknown protein [Arabidopsis thaliana] (TAIR:AT3G02555.1); similar to hypothetical protein [Cleome spinosa] (GB:ABD96917.1) | chr5:5261174-5262671 REVERSE	3914.77	3357.11
Brapa_ESTC001018	AT4G17300	Symbols: OVA8, ATNS1, NS1 | NS1 (OVULE ABORTION 8) | chr4:9681570-9684845 FORWARD	1512.11	1695.86
Brapa_ESTC001019	AT3G11510	Symbols: | 40S ribosomal protein S14 (RPS14B) | chr3:3623763-3624872 REVERSE	2263.45	1695.46
Brapa_ESTC001020	AT5G04840	| Symbols: | bZIP protein | chr5:1406006-1407649 FORWARD	751.455	386.097
Brapa_ESTC001021	AT1G32500	Symbols: ATNAP6 | ATNAP6 (NON-INTRINSIC ABC PROTEIN 6) | chr1:11750071-11751974 REVERSE	1050.12	496.355
Brapa_ESTC001022	AT2G16270	Symbols: | similar to unknown protein [Arabidopsis thaliana] (TAIR:AT1G16630.1); similar to hypothetical protein Tb10.61.0620 [Trypanosoma brucei TREU927] (GB:XP_828040.1); similar to Os03g0672400 [Oryza sativa (japonica cultivar-group)] (GB:NP_001050874.1) | chr2:7052826-7055395 REVERSE	12.3431	18.0104
Brapa_ESTC001023	AT1G30230	Symbols: | elongation factor 1-beta / EF-1-beta | chr1:10639270-10640585 FORWARD	32126.2	37816.8
Brapa_ESTC001024	AT4G14080	Symbols: MEE48 | MEE48 (maternal effect embryo arrest 48); hydrolase, hydrolyzing O-glycosyl compounds | chr4:8118692-8120287 REVERSE	29.3875	50.0809
Brapa_ESTC001025	AT4G18100	Symbols: | 60S ribosomal protein L32 (RPL32A) | chr4:10035727-10036487 REVERSE	27366.9	32270.9
Brapa_ESTC001026	AT1G15370	Symbols: | similar to Lon (GB:ABD28727.1); contains InterPro domain Longin-like; (InterPro:IPR011012) | chr1:5287130-5288370 FORWARD	1146.86	1448.47
Brapa_ESTC001028	AT2G36310	Symbols: | inosine-uridine preferring nucleoside hydrolase family protein | chr2:15231771-15233712 REVERSE	9300.9	12827.8
Brapa_ESTC001029	AT1G74270	Symbols: | 60S ribosomal protein L35a (RPL35aC) | chr1:27932076-27933127 REVERSE	23275.7	30988.2
Brapa_ESTC001030	AT1G76470	Symbols: | cinnamoyl-CoA reductase | chr1:28694849-28696299 REVERSE	145.878	371.705
Brapa_ESTC001031	AT3G15360	Symbols: ATM4, TRX-M4, ATHM4 | ATHM4 (Arabidopsis thioredoxin M-type 4); thiol-disulfide exchange intermediate | chr3:5188455-5189464 FORWARD	968.316	830.809
Brapa_ESTC001032	AT1G77350	Symbols: | similar to unknown protein [Oryza sativa (japonica cultivar-group)] (GB:AAT01331.1); similar to Os05g0486200 [Oryza sativa (japonica cultivar-group)] (GB:NP_001055878.1) | chr1:29075391-29076439 FORWARD	1783.52	3119.43
Brapa_ESTC001033	AT3G18890	Symbols: | catalytic/ coenzyme binding | chr3:6511175-6514735 FORWARD	68.7587	84.7377
Brapa_ESTC001034	AT4G02510	Symbols: TOC86, PPI2, TOC160, ATTOC159, TOC159 | TOC159 (translocon outer membrane complex 159) | chr4:1104766-1109360 FORWARD	9217.08	6492.48
Brapa_ESTC001035	no_hits_f	---------	90.7076	230.561
Brapa_ESTC001036	AT4G28210	Symbols: EMB1923 | EMB1923 (EMBRYO DEFECTIVE 1923) | chr4:13990640-13991937 FORWARD	1525.58	2502.21
Brapa_ESTC001037	AT4G16980	Symbols: | arabinogalactan-protein family | chr4:9557106-9557600 FORWARD	2798.69	5180.01
Brapa_ESTC001038	AT2G31320	Symbols: | poly (ADP-ribose) polymerase, putative / NAD(+) ADP-ribosyltransferase, putative / poly(ADP-ribose) synthetase, putative | chr2:13361123-13366655 REVERSE	37.5282	112.632
Brapa_ESTC001039	AT5G52920	Symbols: | pyruvate kinase, putative | chr5:21480906-21483838 FORWARD	3612.68	4757.4
Brapa_ESTC001041	AT2G31490	Symbols: | similar to Os01g0750800 [Oryza sativa (japonica cultivar-group)] (GB:NP_001044256.1); similar to unknown protein [Oryza sativa (japonica cultivar-group)] (GB:BAB63534.1) | chr2:13419137-13420079 FORWARD	1566.52	4171.11
Brapa_ESTC001042	AT3G11980	Symbols: MS2 | MS2 (MALE STERILITY 2) | chr3:3814490-3816933 FORWARD	32.5096	41.4494
Brapa_ESTC001043	AT3G05020	Symbols: ACP, ACP1 | ACP1 (ACYL CARRIER PROTEIN 1) | chr3:1391869-1392884 REVERSE	14435.9	15412.1
Brapa_ESTC001044	AT3G01910	Symbols: AT-SO, SOX | SOX (SULFITE OXIDASE); sulfite oxidase | chr3:314926-317281 REVERSE	7201.58	6345.33
Brapa_ESTC001045	AT1G44110	Symbols: CYCA1;1 | CYCA1;1 (CYCLIN A1;1); cyclin-dependent protein kinase regulator | chr1:16777475-16779622 REVERSE	102.801	228.673
Brapa_ESTC001046	AT2G14530	Symbols: | similar to unknown protein [Arabidopsis thaliana] (TAIR:AT5G64470.2); similar to Os07g0498900 [Oryza sativa (japonica cultivar-group)] (GB:NP_001059712.1); similar to Os02g0117900 [Oryza sativa (japonica cultivar-group)] (GB:NP_001045691.1); similar to Protein of unknown function DUF231, plant [Medicago truncatula] (GB:ABE84785.1); contains InterPro domain Protein of unknown function D…	668.916	393.173
Brapa_ESTC001047	AT5G48440	| Symbols: | oxidoreductase | chr5:19647158-19649814 REVERSE	667.31	2792.96
Brapa_ESTC001048	AT3G22970	Symbols: | similar to unknown protein [Arabidopsis thaliana] (TAIR:AT4G14620.1); similar to unknown protein [Oryza sativa (japonica cultivar-group)] (GB:AAP44687.1); similar to expressed protein [Oryza sativa (japonica cultivar-group)] (GB:AAT76408.1); similar to Os03g0796600 [Oryza sativa (japonica cultivar-group)] (GB:NP_001051556.1); contains InterPro domain Protein of unknown function DUF506,…	36.5524	97.8978
Brapa_ESTC001049	AT5G15640	Symbols: | mitochondrial substrate carrier family protein | chr5:5087593-5089680 FORWARD	932.577	408.965
Brapa_ESTC001050	AT1G26665	Symbols: | similar to RNA polymerase II mediator complex protein-related [Arabidopsis thaliana] (TAIR:AT5G41910.1); similar to At1g26660/T24P13_4 [Medicago truncatula] (GB:ABE78676.1); similar to Os09g0528300 [Oryza sativa (japonica cultivar-group)] (GB:NP_001063737.1) | chr1:9214497-9215413 FORWARD	7068.29	1377.53
Brapa_ESTC001051	AT5G19090	Symbols: | heavy-metal-associated domain-containing protein | chr5:6387912-6389857 FORWARD	5763.08	9775.13
Brapa_ESTC001052	AT1G28060	Symbols: | small nuclear ribonucleoprotein family protein / snRNP family protein | chr1:9779154-9782473 FORWARD	10565	7529.23
Brapa_ESTC001053	AT4G09650	Symbols: | ATP synthase delta chain, chloroplast, putative / H(+)-transporting two-sector ATPase, delta (OSCP) subunit, putative | chr4:6100796-6101500 FORWARD	3246.48	12546.6
Brapa_ESTC001054	AT5G49460	Symbols: ACLB-2 | ACLB-2 (ATP-citrate lyase B-2) | chr5:20072274-20075421 FORWARD	1474.2	2416.91
Brapa_ESTC001055	AT1G14400	Symbols: ATUBC1, UBC1 | UBC1 (UBIQUITIN CARRIER PROTEIN 1); ubiquitin-protein ligase | chr1:4927289-4928131 REVERSE	16186.5	17802.8
Brapa_ESTC001056	AT4G35420	Symbols: | dihydroflavonol 4-reductase family / dihydrokaempferol 4-reductase family | chr4:16834096-16835616 REVERSE	84.296	127.379
Brapa_ESTC001058	AT3G45030	Symbols: | 40S ribosomal protein S20 (RPS20A) | chr3:16482591-16483297 REVERSE	13728.7	15082.6
Brapa_ESTC001059	AT5G23700	Symbols: | similar to unknown protein [Arabidopsis thaliana] (TAIR:AT3G48860.2); similar to expressed protein [Oryza sativa (japonica cultivar-group)] (GB:ABA93965.1); similar to Os01g0928100 [Oryza sativa (japonica cultivar-group)] (GB:NP_001045273.1); contains domain no description (G3D.1.20.5.190) | chr5:7992854-7996423 FORWARD	1547.55	1244.75
Brapa_ESTC001060	AT5G13930	Symbols: TT4, ATCHS, CHS | CHS (CHALCONE SYNTHASE); naringenin-chalcone synthase | chr5:4488764-4490037 FORWARD	177.365	283.617
Brapa_ESTC001061	AT3G58700	Symbols: | 60S ribosomal protein L11 (RPL11B) | chr3:21722638-21723793 FORWARD	27578.4	14141.7
Brapa_ESTC001062	AT2G40670	Symbols: RR16, ARR16 | ARR16 (response regulator 16); transcription regulator/ two-component response regulator | chr2:16977336-16978198 FORWARD	170.86	1354.8
Brapa_ESTC001063	AT5G08280	Symbols: HEMC | HEMC (HYDROXYMETHYLBILANE SYNTHASE); hydroxymethylbilane synthase | chr5:2663764-2665597 REVERSE	556.242	519.185
Brapa_ESTC001065	AT1G15570	Symbols: CYCA2;3 | CYCA2;3 (CYCLIN A2;3); cyclin-dependent protein kinase regulator | chr1:5363029-5365213 FORWARD	35.9792	69.25
Brapa_ESTC001066	AT1G69730	Symbols: | protein kinase family protein | chr1:26232366-26235002 REVERSE	2932.42	4437.08
Brapa_ESTC001067	AT5G47635	Symbols: | similar to unknown protein [Arabidopsis thaliana] (TAIR:AT2G40113.1); similar to hypothetical protein 31.t00008 [Brassica oleracea] (GB:ABD65108.1) | chr5:19324507-19325075 REVERSE	62.106	74.8069
Brapa_ESTC001068	AT1G68585	| Symbols: | metal ion binding | chr1:25760574-25761089 FORWARD	1886.04	8234.13
Brapa_ESTC001069	AT5G03430	Symbols: | phosphoadenosine phosphosulfate (PAPS) reductase family protein | chr5:849236-852866 REVERSE	836.417	1563.38
Brapa_ESTC001070	AT4G17230	Symbols: SCL13 | SCL13 (SCARECROW-LIKE 13); transcription factor | chr4:9661405-9662268 REVERSE	7264.47	1739.41
Brapa_ESTC001071	AT5G15220	Symbols: | ribosomal protein L27 family protein | chr5:4941469-4942136 REVERSE	3328.21	3248.86
Brapa_ESTC001072	AT3G15640	Symbols: | cytochrome c oxidase family protein | chr3:5299280-5301378 FORWARD	219.57	90.9041
Brapa_ESTC001073	AT3G53610	Symbols: AtRab8B, AtRABE1a, ATRAB8 | ATRAB8 | chr3:19887509-19889242 REVERSE	6398.81	4945.93
Brapa_ESTC001074	AT3G62630	Symbols: | similar to calmodulin-binding protein [Arabidopsis thaliana] (TAIR:AT2G15760.1); similar to conserved hypothetical protein [Medicago truncatula] (GB:ABE84267.1); contains InterPro domain Protein of unknown function DUF1645; (InterPro:IPR012442) | chr3:23174913-23176055 REVERSE	3582.65	2196.68
Brapa_ESTC001075	AT4G14570	Symbols: | acylaminoacyl-peptidase-related | chr4:8362582-8366521 FORWARD	102.166	133.064
Brapa_ESTC001076	AT1G29700	Symbols: | similar to similar to Zn-dependent hydrolases of the beta-lactamase fold [Crocosphaera watsonii WH 8501] (GB:ZP_00516888.1); similar to Os12g0641300 [Oryza sativa (japonica cultivar-group)] (GB:NP_001067402.1); contains domain no description (G3D.3.60.15.10); contains domain Metallo-hydrolase/oxidoreductase (SSF56281) | chr1:10385182-10386892 REVERSE	194.991	279.435
Brapa_ESTC001077	AT4G39560	Symbols: | kelch repeat-containing F-box family protein | chr4:18382934-18383734 REVERSE	5492.21	4833.02
Brapa_ESTC001078	AT1G35340	Symbols: | ATP-dependent protease La (LON) domain-containing protein | chr1:12977746-12979727 FORWARD	573.514	2749.17
Brapa_ESTC001079	AT5G02230	Symbols: | haloacid dehalogenase-like hydrolase family protein | chr5:449130-450505 FORWARD	3623.78	1666.3
Brapa_ESTC001080	AT3G12780	Symbols: PGK1 | PGK1 (PHOSPHOGLYCERATE KINASE 1); phosphoglycerate kinase | chr3:4061134-4063147 REVERSE	1000.96	3369.47
Brapa_ESTC001081	AT2G47590	Symbols: PHR2 | PHR2 (PHOTOLYASE/BLUE-LIGHT RECEPTOR 2) | chr2:19528958-19530802 FORWARD	1058.86	677.605
Brapa_ESTC001082	AT5G25610	Symbols: RD22 | RD22 (RESPONSIVE TO DESSICATION 22) | chr5:8914501-8916687 REVERSE	57525.7	23628
Brapa_ESTC001083	AT4G15960	Symbols: | epoxide hydrolase, putative | chr4:9045777-9047213 REVERSE	969.433	563.601
Brapa_ESTC001084	AT1G23900	Symbols: GAMMA-ADR, GAMMA-ADAPTIN 1 | GAMMA-ADAPTIN 1 (GAMMA-ADAPTIN 1); clathrin binding | chr1:8441368-8447141 FORWARD	1119.46	358.324
Brapa_ESTC001085	AT3G42790	Symbols: | PHD finger family protein | chr3:14889116-14890606 REVERSE	2949.66	5661.88
Brapa_ESTC001086	AT1G11860	Symbols: | aminomethyltransferase, putative | chr1:4001800-4003244 FORWARD	2320.58	16075.4
Brapa_ESTC001087	AT4G36250	Symbols: ALDH3F1 | ALDH3F1 (ALDEHYDE DEHYDROGENASE 3F1); 3-chloroallyl aldehyde dehydrogenase/ aldehyde dehydrogenase (NAD) | chr4:17151032-17153384 FORWARD	6281.45	6938.53
Brapa_ESTC001088	AT3G06860	Symbols: ATMPF2, MFP2 | MFP2 (MULTIFUNCTIONAL PROTEIN); enoyl-CoA hydratase | chr3:2161932-2166015 FORWARD	522.3	515.766
Brapa_ESTC001089	AT2G29990	Symbols: NDA2 | NDA2 (ALTERNATIVE NAD(P)H DEHYDROGENASE 2); NADH dehydrogenase | chr2:12800639-12802990 REVERSE	3578.65	524.795
Brapa_ESTC001090	AT1G54320	Symbols: | LEM3 (ligand-effect modulator 3) family protein / CDC50 family protein | chr1:20279399-20281460 REVERSE	2679.43	2266.81
Brapa_ESTC001091	AT1G72550	Symbols: | tRNA synthetase beta subunit family protein | chr1:27323661-27327570 REVERSE	1711.72	698.941
Brapa_ESTC001092	AT5G43760	Symbols: | beta-ketoacyl-CoA synthase, putative | chr5:17603130-17605713 FORWARD	16646.2	7790.9
Brapa_ESTC001093	AT4G27000	Symbols: | RNA-binding protein 45 (RBP45), putative | chr4:13554989-13557769 REVERSE	23402	14705.4
Brapa_ESTC001094	AT4G19210	Symbols: ATRLI2 | ATRLI2 (Arabidopsis thaliana RNase L inhibitor protein 2) | chr4:10501917-10504787 FORWARD	5413.16	5668.37
Brapa_ESTC001095	AT4G36220	Symbols: CYP84A1, FAH1 | FAH1 (FERULATE-5-HYDROXYLASE 1); ferulate 5-hydroxylase | chr4:17137587-17139622 REVERSE	45.5188	55.8956
Brapa_ESTC001096	AT4G16380	| Symbols: | metal ion binding | chr4:9254659-9255527 FORWARD	26181.4	8660.62
Brapa_ESTC001097	AT1G22300	Symbols: GF14 EPSILON, GRF10 | GRF10 (GENERAL REGULATORY FACTOR 10); protein phosphorylated amino acid binding | chr1:7879135-7881092 REVERSE	7246.5	9114.07
Brapa_ESTC001098	AT2G42840	Symbols: PDF1 | PDF1 (PROTODERMAL FACTOR 1) | chr2:17833404-17834503 REVERSE	67.9701	122.485
Brapa_ESTC001099	AT5G27640	Symbols: EIF3B, ATEIF3B-1, EIF3B-1, ATTIF3B1, TIF3B1 | TIF3B1 (EUKARYOTIC TRANSLATION INITIATION FACTOR 3B); nucleic acid binding / translation initiation factor | chr5:9781210-9784762 REVERSE	8894.49	3826.55
Brapa_ESTC001100	AT5G06970	Symbols: | similar to unknown protein [Arabidopsis thaliana] (TAIR:AT2G20010.2); similar to unknown protein [Oryza sativa (japonica cultivar-group)] (GB:AAP68377.1); similar to Protein of unknown function DUF810 [Medicago truncatula] (GB:ABE85501.1); similar to unknown protein [Oryza sativa] (GB:AAK14418.1); contains InterPro domain Protein of unknown function DUF810; (InterPro:IPR008528) | chr5:…	2433.6	2014.98
Brapa_ESTC001101	AT1G77760	Symbols: GNR1, NR1, NIA1 | NIA1 (NITRATE REDUCTASE 1) | chr1:29240899-29244261 REVERSE	206.271	82.5947
Brapa_ESTC001102	AT4G35260	Symbols: IDH1 | IDH1 (ISOCITRATE DEHYDROGENASE 1); isocitrate dehydrogenase (NAD+) | chr4:16774499-16776238 REVERSE	9349.86	2668.38
Brapa_ESTC001103	AT2G31040	Symbols: | ATP synthase protein I -related | chr2:13216171-13218089 REVERSE	3029.88	2652.67
Brapa_ESTC001104	AT5G03300	Symbols: ADK2 | ADK2 (ADENOSINE KINASE 2); kinase | chr5:796572-798996 FORWARD	5238.9	5873.41
Brapa_ESTC001105	AT1G04530	| Symbols: | binding | chr1:1234455-1235894 REVERSE	340.983	2293.8
Brapa_ESTC001106	AT5G56030	Symbols: ERD8, HSP81-2 | HSP81-2 (EARLY-RESPONSIVE TO DEHYDRATION 8); ATP binding | chr5:22704149-22706659 FORWARD	16382.6	9854.08
Brapa_ESTC001107	AT5G26751	Symbols: ATSK11 | ATSK11 (Arabidopsis thaliana SHAGGY-related kinase 11); protein kinase | chr5:9399585-9401842 REVERSE	7517.71	10841.3
Brapa_ESTC001108	AT3G23820	Symbols: GAE6 | GAE6 (UDP-D-GLUCURONATE 4-EPIMERASE 6); catalytic | chr3:8603652-8605034 FORWARD	7377.36	4411.25
Brapa_ESTC001109	AT5G42960	Symbols: | similar to unknown protein [Arabidopsis thaliana] (TAIR:AT1G45170.1); similar to pore protein of 24 kD (OEP24) [Pisum sativum] (GB:CAA04468.1) | chr5:17252412-17253706 FORWARD	2002.43	1480.89
Brapa_ESTC001110	AT4G27745	Symbols: | Identical to Protein yippee-like At4g27740 [Arabidopsis Thaliana] (GB:Q9T096); similar to yippee family protein [Arabidopsis thaliana] (TAIR:AT5G53940.1); similar to Yippee-like protein At4g27740, putative [Oryza sativa (japonica cultivar-group)] (GB:ABA98518.1); similar to Os12g0484700 [Oryza sativa (japonica cultivar-group)] (GB:NP_001066778.1); contains InterPro domain Yippee-like p…	600.693	651.068
Brapa_ESTC001111	AT3G55280	Symbols: | 60S ribosomal protein L23A (RPL23aB) | chr3:20511644-20512496 FORWARD	12894.1	22044
Brapa_ESTC001112	AT2G37040	Symbols: PAL1 | PAL1 (PHE AMMONIA LYASE 1); phenylalanine ammonia-lyase | chr2:15564681-15567316 REVERSE	5267.2	1100.56
Brapa_ESTC001113	no_hits_f	---------	1497.46	4404.38
Brapa_ESTC001114	AT3G08590	Symbols: | 2,3-biphosphoglycerate-independent phosphoglycerate mutase, putative / phosphoglyceromutase, putative | chr3:2608689-2611243 REVERSE	2581.99	2945.33
Brapa_ESTC001115	AT2G36320	Symbols: | zinc finger (AN1-like) family protein | chr2:15236467-15236952 FORWARD	5841.85	2057.75
Brapa_ESTC001116	AT1G70370	Symbols: | BURP domain-containing protein / polygalacturonase, putative | chr1:26516666-26518661 REVERSE	3894.59	1384.24
Brapa_ESTC001117	no_hits_f	---------	10722.8	23310.3
Brapa_ESTC001118	AT3G59970	Symbols: MTHFR1 | MTHFR1 (METHYLENETETRAHYDROFOLATE REDUCTASE 1); methylenetetrahydrofolate reductase (NADPH) | chr3:22162280-22165300 FORWARD	3704.93	2411.99
Brapa_ESTC001119	AT4G32590	| Symbols: | ferredoxin-related | chr4:15721423-15722782 FORWARD	674.417	1304.73
Brapa_ESTC001120	AT5G65220	Symbols: | ribosomal protein L29 family protein | chr5:26078527-26079732 FORWARD	5808.07	12653.9
Brapa_ESTC001121	AT1G48100	Symbols: | glycoside hydrolase family 28 protein / polygalacturonase (pectinase) family protein | chr1:17770590-17773294 FORWARD	4416.85	21645.9
Brapa_ESTC001122	AT5G26710	Symbols: | glutamate-tRNA ligase, putative / glutamyl-tRNA synthetase, putatuve / GluRS, putative | chr5:9305676-9308250 FORWARD	296.516	145.844
Brapa_ESTC001123	AT4G16830	Symbols: | nuclear RNA-binding protein (RGGA) | chr4:9470671-9472327 FORWARD	1157.92	2658.75
Brapa_ESTC001124	AT4G30190	Symbols: PMA2, AHA2 | AHA2 (Arabidopsis H(+)-ATPase 2); ATPase | chr4:14770826-14775926 REVERSE	21313.1	22471.3
Brapa_ESTC001125	AT3G14067	| Symbols: | subtilase family protein | chr3:4658428-4660761 REVERSE	6372.54	7006
Brapa_ESTC001126	AT4G28780	Symbols: | GDSL-motif lipase/hydrolase family protein | chr4:14215609-14217165 FORWARD	267.694	188.521
Brapa_ESTC001127	AT5G60410	Symbols: ATSIZ1, SIZ1 | ATSIZ1/SIZ1; DNA binding / SUMO ligase | chr5:24312452-24317897 FORWARD	8256.68	5945.77
Brapa_ESTC001128	AT4G00450	Symbols: CRP | CRP (CRYPTIC PRECOCIOUS) | chr4:203471-210666 FORWARD	1333.69	1478.18
Brapa_ESTC001129	AT3G45040	Symbols: | phosphatidate cytidylyltransferase family protein | chr3:16483786-16486687 REVERSE	7050.39	8049.34
Brapa_ESTC001130	AT1G68530	Symbols: CER6, G2, POP1, CUT1 | CUT1 (CUTICULAR 1); acyltransferase | chr1:25716544-25718396 REVERSE	980.415	600.092
Brapa_ESTC001131	AT3G01120	Symbols: CGS, ATCYS1, CGS1, MTO1 | MTO1 (METHIONINE OVERACCUMULATION 1) | chr3:39241-41872 REVERSE	3036.21	1274.81
Brapa_ESTC001132	AT1G48300	Symbols: | similar to soluble diacylglycerol acyltransferase [Arachis hypogaea] (GB:AAX62735.1); contains InterPro domain Thioredoxin-like fold; (InterPro:IPR012336); contains InterPro domain Thioredoxin fold; (InterPro:IPR012335) | chr1:17851059-17852006 FORWARD	9274.41	14510.9
Brapa_ESTC001133	AT4G03190	Symbols: ATGRH1, ATGER1, AFB1, GRH1 | GRH1 (GRR1-LIKE PROTEIN 1); ubiquitin-protein ligase | chr4:1405108-1407057 REVERSE	873.251	2208.19
Brapa_ESTC001134	AT1G75330	Symbols: OTC | OTC (ORNITHINE CARBAMOYLTRANSFERASE); amino acid binding / carboxyl- and carbamoyltransferase | chr1:28270118-28272044 REVERSE	1328.64	542.05
Brapa_ESTC001135	AT5G51260	Symbols: | acid phosphatase, putative | chr5:20849448-20850692 REVERSE	6033.32	7205.49
Brapa_ESTC001136	AT2G39730	Symbols: RCA | RCA (RUBISCO ACTIVASE) | chr2:16578252-16580423 REVERSE	11953.3	22514.5
Brapa_ESTC001137	AT5G36940	Symbols: CAT3 | CAT3 (CATIONIC AMINO ACID TRANSPORTER 3); cationic amino acid transporter | chr5:14607560-14611367 FORWARD	1041.25	2940.63
Brapa_ESTC001138	AT1G78060	Symbols: | glycosyl hydrolase family 3 protein | chr1:29354690-29357762 REVERSE	2266.37	1472.59
Brapa_ESTC001139	AT3G55430	Symbols: | glycosyl hydrolase family 17 protein / beta-1,3-glucanase, putative | chr3:20560783-20562981 REVERSE	1206.6	123.86
Brapa_ESTC001140	AT1G54920	Symbols: | similar to expressed protein [Oryza sativa (japonica cultivar-group)] (GB:ABA91482.1) | chr1:20474583-20478565 FORWARD	737.698	396.974
Brapa_ESTC001141	AT3G55610	Symbols: P5CS2 | P5CS2 (DELTA 1-PYRROLINE-5-CARBOXYLATE SYNTHASE 2); catalytic/ glutamate 5-kinase/ glutamate-5-semialdehyde dehydrogenase | chr3:20635257-20639968 REVERSE	4291.96	8251.27
Brapa_ESTC001142	AT1G72550	Symbols: | tRNA synthetase beta subunit family protein | chr1:27323661-27327570 REVERSE	455.598	314.674
Brapa_ESTC001143	AT5G17350	Symbols: | similar to unknown protein [Arabidopsis thaliana] (TAIR:AT3G03280.1); similar to conserved hypothetical protein [Medicago truncatula] (GB:ABE92227.1); contains InterPro domain TGS-like; (InterPro:IPR012676) | chr5:5718855-5719406 FORWARD	3655	3093.35
Brapa_ESTC001144	AT1G09812	Symbols: | similar to unknown protein [Arabidopsis thaliana] (TAIR:AT1G58007.1); similar to hypothetical protein MtrDRAFT_AC140550g16v1 [Medicago truncatula] (GB:ABE79565.1) | chr1:3187819-3188582 FORWARD	2706.92	6974.76
Brapa_ESTC001145	AT1G21920	Symbols: | MORN (Membrane Occupation and Recognition Nexus) repeat-containing protein /phosphatidylinositol-4-phosphate 5-kinase-related | chr1:7704443-7705855 REVERSE	69.3661	61.9113
Brapa_ESTC001146	AT3G55030	Symbols: PGPS2 | PGPS2 (phosphatidylglycerolphosphate synthase 2); CDP-alcohol phosphatidyltransferase/ CDP-diacylglycerol-glycerol-3-phosphate 3-phosphatidyltransferase | chr3:20407837-20409201 FORWARD	6296.6	4041.88
Brapa_ESTC001147	AT5G15550	Symbols: | transducin family protein / WD-40 repeat family protein | chr5:5059318-5062006 REVERSE	180.977	268.828
Brapa_ESTC001148	AT5G13190	Symbols: | similar to LITAF-domain-containing protein [Pisum sativum] (GB:AAY40471.1); similar to Os02g0515600 [Oryza sativa (japonica cultivar-group)] (GB:NP_001046956.1); contains InterPro domain LPS-induced tumor necrosis factor alpha factor; (InterPro:IPR006629) | chr5:4204990-4206208 REVERSE	18120.9	14446.7
Brapa_ESTC001149	AT4G00490	Symbols: BMY9 | BMY9 (beta-amylase 9); beta-amylase | chr4:222422-224862 FORWARD	1320.45	1628.98
Brapa_ESTC001151	AT3G52850	Symbols: VSR1, BP-80, ATELP, VSR-1, BP80, BP80B, ATELP1 | ATELP1 (VACUOLAR SORTING RECEPTOR HOMOLOG) | chr3:19598977-19602668 FORWARD	1836.06	1020.4
Brapa_ESTC001152	AT2G37630	Symbols: AtPHAN, AS1, AtMYB91, MYB91 | AS1 (ASYMMETRIC LEAVES 1); DNA binding / transcription factor | chr2:15788876-15789979 REVERSE	20832.3	25137.5
Brapa_ESTC001153	no_hits_f	---------	1657.78	2357.35
Brapa_ESTC001154	AT1G53750	Symbols: RPT1A | RPT1A (regulatory particle triple-A 1A); ATPase | chr1:20069589-20071992 REVERSE	23253.1	14963.4
Brapa_ESTC001155	AT1G72710	Symbols: | casein kinase, putative | chr1:27376215-27379840 FORWARD	3099.64	1430.09
Brapa_ESTC001156	AT5G08760	| Symbols: | unknown protein | chr5:2854948-2855480 FORWARD	18007.6	13350.1
Brapa_ESTC001157	AT1G18210	Symbols: | calcium-binding protein, putative | chr1:6268266-6268778 REVERSE	34647	12522.8
Brapa_ESTC001158	AT4G19420	Symbols: | pectinacetylesterase family protein | chr4:10587515-10589818 REVERSE	348.019	233.28
Brapa_ESTC001159	AT3G29000	Symbols: | calcium-binding EF hand family protein | chr3:11007028-11007612 FORWARD	170.984	10.1333
Brapa_ESTC001160	AT1G01160	Symbols: GIF2 | GIF2 (GRF1-INTERACTING FACTOR 2) | chr1:72583-73883 FORWARD	5036.87	2992.37
Brapa_ESTC001161	AT1G80130	| Symbols: | binding | chr1:30146142-30147370 REVERSE	1818.21	6048.33
Brapa_ESTC001162	AT2G23390	Symbols: | similar to Os04g0442200 [Oryza sativa (japonica cultivar-group)] (GB:NP_001052881.1); similar to P0076O17.10 [Oryza sativa (japonica cultivar-group)] (GB:CAE02512.1); contains InterPro domain Protein of unknown function DUF482; (InterPro:IPR007434) | chr2:9967648-9970556 REVERSE	526.363	2087.57
Brapa_ESTC001163	AT4G32800	Symbols: | AP2 domain-containing transcription factor TINY, putative | chr4:15819816-15820481 FORWARD	39.0905	175
Brapa_ESTC001164	AT5G03345	Symbols: | similar to PREDICTED: similar to CG15168-PA [Apis mellifera] (GB:XP_001121144.1); similar to Os12g0566400 [Oryza sativa (japonica cultivar-group)] (GB:NP_001067053.1); contains domain FAMILY NOT NAMED (PTHR21181); contains domain gb def: Hypothetical protein (PTHR21181:SF6) | chr5:814195-815477 FORWARD	2896.57	4036.35
Brapa_ESTC001165	AT2G32870	Symbols: | meprin and TRAF homology domain-containing protein / MATH domain-containing protein | chr2:13952045-13953853 REVERSE	9146.62	4232.47
Brapa_ESTC001166	AT2G30490	Symbols: ATC4H, C4H, CYP73A5 | ATC4H (CINNAMATE-4-HYDROXYLASE) | chr2:13000938-13002760 REVERSE	4307.93	291.471
Brapa_ESTC001167	AT1G55020	Symbols: LOX1 | LOX1 (Lipoxygenase 1); lipoxygenase | chr1:20529465-20533810 FORWARD	4919.62	4707.8
Brapa_ESTC001168	AT4G33250	Symbols: TIF3K1, ATTIF3K1, EIF3K | EIF3K (eukaryotic translation initiation factor 3K) | chr4:16039070-16040621 REVERSE	13815.6	17871.3
Brapa_ESTC001169	AT1G29390	Symbols: COR314-TM2 | COR314-TM2 (cold regulated 314 thylakoid membrane 2) | chr1:10286395-10287864 REVERSE	9242.02	6388.63
Brapa_ESTC001170	AT5G66590	Symbols: | allergen V5/Tpx-1-related family protein | chr5:26591481-26592038 FORWARD	498.146	307.636
Brapa_ESTC001171	AT1G03080	Symbols: | kinase interacting family protein | chr1:731794-737332 REVERSE	1843.6	3130.72
Brapa_ESTC001172	AT4G31800	Symbols: WRKY18 | WRKY18 (WRKY DNA-binding protein 18); transcription factor | chr4:15383302-15384818 FORWARD	615.555	769.354
Brapa_ESTC001173	AT2G33390	| Symbols: | unknown protein | chr2:14158790-14159774 FORWARD	1654.16	2734.36
Brapa_ESTC001174	AT3G15530	Symbols: | similar to unknown protein [Arabidopsis thaliana] (TAIR:AT5G54400.1); similar to conserved hypothetical protein [Chloroflexus aurantiacus J-10-fl] (GB:ZP_00766604.1); contains InterPro domain SAM (and some other nucleotide) binding motif; (InterPro:IPR000051); contains InterPro domain Methyltransferase type 11; (InterPro:IPR013216); contains InterPro domain Generic methyltransferase; (…	1194.72	272.504
Brapa_ESTC001175	AT3G28715	Symbols: | H+-transporting two-sector ATPase, putative | chr3:10779262-10781587 FORWARD	445.944	231.507
Brapa_ESTC001177	AT2G01980	Symbols: ATSOS1, SOS1 | SOS1 (SALT OVERLY SENSITIVE 1); sodium:hydrogen antiporter | chr2:457069-463144 FORWARD	3062.76	1851.58
Brapa_ESTC001178	AT2G44610	Symbols: AtRABH1b, AtRab6A, RAB6 | RAB6; GTP binding | chr2:18418854-18420959 REVERSE	16083.6	6562.73
Brapa_ESTC001179	AT5G38640	Symbols: | eukaryotic translation initiation factor 2B family protein / eIF-2B family protein | chr5:15485250-15487904 REVERSE	2660.48	860.601
Brapa_ESTC001180	no_hits_f	---------	12.9938	13.9781
Brapa_ESTC001181	AT5G55850	| Symbols: NOI | NOI | chr5:22620843-22622177 FORWARD	7626.27	6666.72
Brapa_ESTC001182	AT1G60900	Symbols: | U2 snRNP auxiliary factor large subunit, putative | chr1:22427673-22431471 FORWARD	414.711	376.76
Brapa_ESTC001183	AT1G17080	Symbols: | similar to unknown protein [Arabidopsis thaliana] (TAIR:AT1G53560.1); similar to Os01g0667100 [Oryza sativa (japonica cultivar-group)] (GB:NP_001043806.1); similar to Os05g0564800 [Oryza sativa (japonica cultivar-group)] (GB:NP_001056334.1); similar to Os01g0242900 [Oryza sativa (japonica cultivar-group)] (GB:NP_001042559.1); contains domain 60S RIBOSOMAL PROTEIN L18A (PTHR10052); cont…	19258.9	6973.78
Brapa_ESTC001184	AT5G52960	Symbols: | similar to hypothetical protein asr2994 [Nostoc sp. PCC 7120] (GB:NP_487034.1); similar to Os05g0569200 [Oryza sativa (japonica cultivar-group)] (GB:NP_001056361.1) | chr5:21494476-21495495 FORWARD	2424.08	13565.1
Brapa_ESTC001185	no_hits_f	---------	643.062	528.592
Brapa_ESTC001186	AT5G05370	Symbols: | ubiquinol-cytochrome C reductase complex ubiquinone-binding protein, putative / ubiquinol-cytochrome C reductase complex 8.2 kDa protein, putative | chr5:1590978-1591870 REVERSE	1099.12	2118.9
Brapa_ESTC001187	AT3G49210	Symbols: | similar to unknown protein [Arabidopsis thaliana] (TAIR:AT3G49200.1); similar to condensation domain-containing protein [Arabidopsis thaliana] (TAIR:AT3G49190.1); similar to Protein of unknown function DUF1298 [Medicago truncatula] (GB:ABE82755.1); contains InterPro domain Protein of unknown function UPF0089; (InterPro:IPR004255); contains InterPro domain Protein of unknown function DU…	2567.14	2698.67
Brapa_ESTC001188	no_hits_f	---------	1727.26	251.699
Brapa_ESTC001189	no_hits_f	---------	498.416	1139.53
Brapa_ESTC001190	AT3G13390	Symbols: SKS11 | SKS11 (SKU5 Similar 11); copper ion binding / oxidoreductase | chr3:4351408-4353296 REVERSE	46.9615	70.4596
Brapa_ESTC001191	AT5G58950	Symbols: | protein kinase family protein | chr5:23818362-23820251 REVERSE	1353.26	598.639
Brapa_ESTC001192	AT2G40520	Symbols: | nucleotidyltransferase family protein | chr2:16930619-16932753 FORWARD	5596.52	4396.39
Brapa_ESTC001193	AT1G29850	Symbols: | double-stranded DNA-binding family protein | chr1:10447850-10449614 FORWARD	4137.64	7217.33
Brapa_ESTC001194	AT2G47030	Symbols: | pectinesterase family protein | chr2:19331485-19333338 REVERSE	20.4204	34.2697
Brapa_ESTC001195	AT3G28210	Symbols: PMZ | PMZ; zinc ion binding | chr3:10521822-10522460 FORWARD	1112.44	520.703
Brapa_ESTC001196	AT4G18700	Symbols: SnRK3.9, CIPK12 | CIPK12 (CIPK12); kinase | chr4:10289121-10290590 REVERSE	517.464	428.574
Brapa_ESTC001197	AT1G78090	Symbols: ATTPPB | ATTPPB (TREHALOSE-6-PHOSPHATE PHOSPHATASE) | chr1:29378848-29381188 FORWARD	33.5893	18.225
Brapa_ESTC001198	AT3G01700	Symbols: ATAGP11, AGP11 | AGP11 (ARABINOGALACTAN PROTEIN 11) | chr3:258988-259398 FORWARD	79.8428	85.757
Brapa_ESTC001199	AT5G04490	Symbols: VTE5 | VTE5 (VITAMIN E PATHWAY GENE5); phosphatidate cytidylyltransferase/ phytol kinase | chr5:1279868-1281588 FORWARD	6829.25	4084.25
Brapa_ESTC001200	no_hits_f	---------	10.3505	20.5579
Brapa_ESTC001201	AT3G03090	Symbols: ATVGT1 | sugar transporter family protein | chr3:700756-704586 REVERSE	457.148	520.37
Brapa_ESTC001202	AT2G47050	Symbols: | invertase/pectin methylesterase inhibitor family protein | chr2:19338997-19339647 REVERSE	84.9013	101.361
Brapa_ESTC001203	AT3G20290	| Symbols: | calcium ion binding | chr3:7075063-7078661 REVERSE	4363.54	5457.18
Brapa_ESTC001204	AT3G55980	Symbols: | zinc finger (CCCH-type) family protein | chr3:20787836-20789578 FORWARD	16247.2	15042.2
Brapa_ESTC001205	AT4G32120	Symbols: | galactosyltransferase family protein | chr4:15517236-15519693 REVERSE	916.159	4501.7
Brapa_ESTC001206	AT1G11760	Symbols: | similar to At1g11760 [Medicago truncatula] (GB:ABE82612.1); contains domain FAMILY NOT NAMED (PTHR21528); contains domain SUBFAMILY NOT NAMED (PTHR21528:SF2) | chr1:3972356-3972811 REVERSE	2081.37	678.676
Brapa_ESTC001207	AT5G13710	Symbols: CPH, SMT1 | SMT1 (STEROL METHYLTRANSFERASE 1) | chr5:4424051-4426869 REVERSE	2886.79	5412.43
Brapa_ESTC001208	AT1G27650	| Symbols: ATU2AF35A | ATU2AF35A | chr1:9615289-9616029 FORWARD	4892.76	6441.85
Brapa_ESTC001209	AT4G03080	Symbols: | kelch repeat-containing serine/threonine phosphoesterase family protein | chr4:1359935-1365166 REVERSE	519.434	422.005
Brapa_ESTC001210	AT1G29910	Symbols: CAB3, AB180, LHCB1.2 | CAB3 (CHLOROPHYLL A/B BINDING PROTEIN 3); chlorophyll binding | chr1:10472427-10473230 REVERSE	24106.3	40923.7
Brapa_ESTC001211	AT3G03600	Symbols: RPS2 | RPS2 (RIBOSOMAL PROTEIN S2); structural constituent of ribosome | chr3:867854-868513 REVERSE	11372.7	28641.6
Brapa_ESTC001212	AT5G20250	Symbols: DIN10 | DIN10 (DARK INDUCIBLE 10); hydrolase, hydrolyzing O-glycosyl compounds | chr5:6834209-6836637 FORWARD	2220.01	824.739
Brapa_ESTC001213	AT4G32150	Symbols: VAMP711, ATVAMP711, VAMP7C | VAMP7C (VESICLE-ASSOCIATED MEMBRANE PROTEIN 7C) | chr4:15526413-15527657 REVERSE	15534.6	15460.3
Brapa_ESTC001214	AT2G17695	Symbols: | similar to expressed protein [Oryza sativa (japonica cultivar-group)] (GB:ABF93547.1); similar to Unknown protein [Oryza sativa (japonica cultivar-group)] (GB:AAN62778.1); similar to expressed protein [Oryza sativa (japonica cultivar-group)] (GB:ABF93551.1) | chr2:7691296-7692091 REVERSE	2813.27	11868
Brapa_ESTC001215	AT1G02780	Symbols: EMB2386 | EMB2386 (EMBRYO DEFECTIVE 2386); structural constituent of ribosome | chr1:608120-609391 REVERSE	12120.8	10082
Brapa_ESTC001217	AT4G38960	Symbols: | zinc finger (B-box type) family protein | chr4:18161570-18163039 FORWARD	1309.58	12957.3
Brapa_ESTC001218	AT1G79470	Symbols: | inosine-5'-monophosphate dehydrogenase | chr1:29899665-29901554 REVERSE	1772.6	179.176
Brapa_ESTC001219	AT1G51400	Symbols: | photosystem II 5 kD protein | chr1:19055840-19056160 REVERSE	1462.72	5917.64
Brapa_ESTC001220	AT2G19570	Symbols: AT-CDA1, DESZ, CDA1 | CDA1 (CYTIDINE DEAMINASE 1) | chr2:8477680-8478585 REVERSE	21182.3	13565.5
Brapa_ESTC001221	AT5G19140	Symbols: | auxin/aluminum-responsive protein, putative | chr5:6423400-6425787 FORWARD	17857.7	22191.3
Brapa_ESTC001222	AT2G15890	Symbols: MEE14 | MEE14 (maternal effect embryo arrest 14) | chr2:6928278-6929060 REVERSE	16200.4	5443.16
Brapa_ESTC001223	AT4G26080	Symbols: ABI1 | ABI1 (ABA INSENSITIVE 1); calcium ion binding / protein phosphatase type 2C | chr4:13220240-13221837 REVERSE	114.974	93.5872
Brapa_ESTC001224	AT3G27850	Symbols: RPL12-C | RPL12-C (RIBOSOMAL PROTEIN L12-C); structural constituent of ribosome | chr3:10326142-10326705 FORWARD	14606.7	13641
Brapa_ESTC001225	AT3G19820	Symbols: DIM, EVE1, DW1, DIM1, CBB1, DWF1 | DWF1 (DIMINUTO 1); catalytic | chr3:6879841-6881622 REVERSE	6955.65	10595.9
Brapa_ESTC001226	AT5G59430	Symbols: ATTRP1 | ATTRP1 (TELOMERE REPEAT BINDING PROTEIN 1) | chr5:23985480-23987921 FORWARD	641.544	305.505
Brapa_ESTC001227	AT5G27380	Symbols: GSH2, GSHB | GSH2 (GLUTATHIONE SYNTHETASE 2); glutathione synthase | chr5:9668214-9670915 REVERSE	435.751	1386.86
Brapa_ESTC001228	AT3G55620	Symbols: EMB1624 | EMB1624 (EMBRYO DEFECTIVE 1624); translation initiation factor | chr3:20645560-20647291 FORWARD	16471.2	11732.2
Brapa_ESTC001229	AT2G02390	Symbols: GST18, ATGSTZ1 | ATGSTZ1 (GLUTATHIONE S-TRANSFERASE 18); glutathione transferase | chr2:629014-630954 FORWARD	295.084	338.309
Brapa_ESTC001230	AT3G11670	Symbols: DGD1 | DGD1 (DIGALACTOSYL DIACYLGLYCEROL DEFICIENT 1); galactolipid galactosyltransferase/ transferase, transferring glycosyl groups | chr3:3681096-3684501 REVERSE	1383.34	877.969
Brapa_ESTC001231	AT2G17290	Symbols: ATCDPK3, CPK6 | CPK6 (CALCIUM-DEPENDENT PROTEIN KINASE 6); anion channel/ calcium- and calmodulin-dependent protein kinase/ kinase | chr2:7524087-7526321 FORWARD	1397.7	904.804
Brapa_ESTC001232	no_hits_f	---------	10973.2	1115.99
Brapa_ESTC001234	AT2G25080	Symbols: ATGPX1 | ATGPX1 (GLUTATHIONE PEROXIDASE 1); glutathione peroxidase | chr2:10675213-10676907 FORWARD	3180.79	4899.83
Brapa_ESTC001235	AT1G01490	| Symbols: | metal ion binding | chr1:180401-182066 REVERSE	1399.95	1028.4
Brapa_ESTC001236	AT4G21770	Symbols: | pseudouridine synthase family protein | chr4:11564040-11566357 REVERSE	613.638	749.654
Brapa_ESTC001237	AT5G67420	Symbols: LBD37 | LOB domain protein 37 / lateral organ boundaries domain protein 37 (LBD37) | chr5:26921802-26922641 REVERSE	20.0934	42.1044
Brapa_ESTC001238	AT5G13100	Symbols: | similar to Os01g0102500 [Oryza sativa (japonica cultivar-group)] (GB:NP_001041749.1); contains domain no description (G3D.3.40.109.10); contains domain NADH oxidase/flavin reductase (SSF55469) | chr5:4156792-4158238 FORWARD	732.475	2611
Brapa_ESTC001239	AT1G17470	Symbols: ATDRG, ATDRG1 | ATDRG1 (ARABIDOPSIS THALIANA DEVELOPMENTALLY REGULATED G-PROTEIN 1) | chr1:6003435-6006148 FORWARD	9068.03	8126.74
Brapa_ESTC001240	no_hits_f	---------	7091.79	8178.01
Brapa_ESTC001241	AT2G46950	Symbols: CYP709B2 | CYP709B2 (cytochrome P450, family 709, subfamily B, polypeptide 2); oxygen binding | chr2:19296535-19298610 REVERSE	3222.86	4431.67
Brapa_ESTC001242	AT3G50880	Symbols: | HhH-GPD base excision DNA repair family protein | chr3:18924490-18925311 FORWARD	297.414	188.842
Brapa_ESTC001243	no_hits_f	---------	368.172	1030.34
Brapa_ESTC001244	AT4G12720	Symbols: NUDT7, GFG1, AtNUDT7 | AtNUDT7 (ARABIDOPSIS THALIANA NUDIX HYDROLASE HOMOLOG 7); hydrolase | chr4:7487713-7489554 FORWARD	8222.39	15198.2
Brapa_ESTC001245	AT5G47640	Symbols: | CCAAT-box binding transcription factor subunit B (NF-YB) (HAP3 ) (AHAP3) family (Hap3b) | chr5:19326640-19327212 FORWARD	24.7044	36.0222
Brapa_ESTC001246	AT1G29220	Symbols: | transcriptional regulator family protein | chr1:10210664-10212557 REVERSE	381.76	294.269
Brapa_ESTC001247	AT1G53070	Symbols: | legume lectin family protein | chr1:19782039-19782857 FORWARD	713.961	370.921
Brapa_ESTC001248	AT5G22840	Symbols: | protein kinase family protein | chr5:7631106-7633106 REVERSE	583.138	173.418
Brapa_ESTC001249	AT4G29190	Symbols: | zinc finger (CCCH-type) family protein | chr4:14392239-14393309 REVERSE	26187.4	17489.4
Brapa_ESTC001250	AT3G27240	Symbols: | cytochrome c1, putative | chr3:10057381-10059607 REVERSE	117.905	55.7519
Brapa_ESTC001251	AT1G77530	Symbols: | O-methyltransferase family 2 protein | chr1:29140931-29142317 FORWARD	198.953	171.982
Brapa_ESTC001252	AT2G38390	| Symbols: | peroxidase, putative | chr2:16086804-16088459 FORWARD	3475	1374.16
Brapa_ESTC001253	AT5G27520	Symbols: | mitochondrial substrate carrier family protein | chr5:9714667-9716247 REVERSE	6478.3	5478.93
Brapa_ESTC001254	AT2G16430	Symbols: PAP10 | PAP10; acid phosphatase/ protein serine/threonine phosphatase | chr2:7127584-7129854 REVERSE	413.182	1069.73
Brapa_ESTC001255	AT5G37790	Symbols: | protein kinase family protein | chr5:15025663-15028255 REVERSE	818.044	719.291
Brapa_ESTC001256	AT5G09810	Symbols: ACT2/7, ACT7 | ACT7 (actin 7) | chr5:3052810-3054221 FORWARD	19185	10060.2
Brapa_ESTC001257	AT4G09030	Symbols: ATAGP10, AGP10 | AGP10 (Arabinogalactan protein 10) | chr4:5792246-5792629 FORWARD	6475.25	417.348
Brapa_ESTC001258	AT5G15740	Symbols: | similar to unknown protein [Arabidopsis thaliana] (TAIR:AT3G02250.1); similar to hypothetical protein [Cleome spinosa] (GB:ABD96934.1); similar to Os06g0284200 [Oryza sativa (japonica cultivar-group)] (GB:NP_001057398.1); similar to hypothetical protein [Cleome spinosa] (GB:ABD96844.1); contains InterPro domain Protein of unknown function DUF246, plant; (InterPro:IPR004348) | chr5:5134…	14377.5	5735.47
Brapa_ESTC001259	AT5G15200	Symbols: | 40S ribosomal protein S9 (RPS9B) | chr5:4935127-4936337 REVERSE	13230.1	17470
Brapa_ESTC001260	AT1G73840	Symbols: ESP1 | ESP1 (ENHANCED SILENCING PHENOTYPE 1) | chr1:27767598-27769989 REVERSE	240.156	107.924
Brapa_ESTC001262	AT1G43170	Symbols: EMB2207, RPL3A | ARP1 (ARABIDOPSIS RIBOSOMAL PROTEIN 1) | chr1:16269959-16271071 FORWARD	40801	30787
Brapa_ESTC001263	AT4G05530	Symbols: | short-chain dehydrogenase/reductase (SDR) family protein | chr4:2816459-2818071 FORWARD	1623.67	1086.62
Brapa_ESTC001264	AT5G65620	Symbols: | peptidase M3 family protein / thimet oligopeptidase family protein | chr5:26239177-26243010 FORWARD	2187.46	1642.56
Brapa_ESTC001265	AT3G62600	Symbols: | DNAJ heat shock family protein | chr3:23162014-23164322 REVERSE	438.296	1037.81
Brapa_ESTC001266	AT1G63300	Symbols: | similar to unknown protein [Arabidopsis thaliana] (TAIR:AT5G41140.1); similar to putative myosin [Oryza sativa (japonica cultivar-group)] (GB:AAO72668.1); contains domain MYOSIN HEAVY CHAIN-RELATED (PTHR23160) | chr1:23485858-23489732 FORWARD	122.294	182.861
Brapa_ESTC001267	AT3G22930	| Symbols: | calmodulin, putative | chr3:8124293-8125842 REVERSE	10343.7	12486.6
Brapa_ESTC001268	AT3G45030	Symbols: | 40S ribosomal protein S20 (RPS20A) | chr3:16482591-16483297 REVERSE	28568.3	48980.5
Brapa_ESTC001269	AT3G03890	| Symbols: | FMN binding | chr3:999674-1002003 REVERSE	1257.14	1809.86
Brapa_ESTC001270	AT3G09800	Symbols: | clathrin adaptor complex small chain family protein | chr3:3006736-3007921 REVERSE	4138.86	10799.9
Brapa_ESTC001271	AT3G17020	Symbols: | universal stress protein (USP) family protein | chr3:5802734-5804069 REVERSE	12941.2	11972.9
Brapa_ESTC001272	AT3G10985	Symbols: | wound-responsive protein-related | chr3:3442782-3443114 FORWARD	15232	4420.56
Brapa_ESTC001274	AT5G37020	Symbols: ARF8 | ARF8 (AUXIN RESPONSE FACTOR 8); transcription factor | chr5:14647381-14651336 FORWARD	1560.37	1521.52
Brapa_ESTC001275	AT5G13680	Symbols: ELO2, ABO1 | ABO1/ELO2 (ABA-OVERLY SENSITIVE 1); transcriptional elongation regulator | chr5:4410525-4415474 REVERSE	256.453	174.99
Brapa_ESTC001276	AT1G63840	Symbols: | zinc finger (C3HC4-type RING finger) family protein | chr1:23693654-23694154 REVERSE	5722.67	3674.41
Brapa_ESTC001277	AT3G45160	| Symbols: | unknown protein | chr3:16544640-16544915 REVERSE	7.7433	8.1277
Brapa_ESTC001278	AT4G13770	Symbols: REF2, CYP83A1 | CYP83A1 (CYTOCHROME P450 83A1); oxygen binding | chr4:7990678-7992278 REVERSE	645.18	71.7266
Brapa_ESTC001279	AT2G43410	| Symbols: FPA | FPA (FPA) | chr2:18033474-18038066 REVERSE	8996.75	2341.61
Brapa_ESTC001280	AT3G27200	Symbols: | plastocyanin-like domain-containing protein | chr3:10044975-10045577 REVERSE	388.171	57.6699
Brapa_ESTC001281	AT1G77940	Symbols: | 60S ribosomal protein L30 (RPL30B) | chr1:29309010-29310182 REVERSE	12863.8	16877.2
Brapa_ESTC001282	AT3G09500	Symbols: | 60S ribosomal protein L35 (RPL35A) | chr3:2917053-2917901 FORWARD	7293.79	7213.47
Brapa_ESTC001283	AT5G51570	Symbols: | band 7 family protein | chr5:20966737-20968460 FORWARD	19050.1	8460.43
Brapa_ESTC001284	AT5G40960	Symbols: | similar to unknown protein [Arabidopsis thaliana] (TAIR:AT5G63500.1); similar to hypothetical protein [Oryza sativa (japonica cultivar-group)] (GB:BAD45503.1); similar to Os01g0849500 [Oryza sativa (japonica cultivar-group)] (GB:NP_001044809.1); similar to P0402A09.15 [Oryza sativa (japonica cultivar-group)] (GB:BAB62632.1) | chr5:16429973-16430179 REVERSE	6368.42	8607.01
Brapa_ESTC001285	AT4G01650	Symbols: | similar to unknown protein [Arabidopsis thaliana] (TAIR:AT5G08720.1); similar to COG2867: Oligoketide cyclase/lipid transport protein [Nostoc punctiforme PCC 73102] (GB:ZP_00109164.1); similar to Os01g0971700 [Oryza sativa (japonica cultivar-group)] (GB:NP_001045536.1); contains InterPro domain Streptomyces cyclase/dehydrase; (InterPro:IPR005031) | chr4:704578-706931 REVERSE	1436.05	3558.45
Brapa_ESTC001286	AT1G70770	Symbols: | similar to unknown protein [Arabidopsis thaliana] (TAIR:AT1G23170.1); similar to Os01g0128400 [Oryza sativa (japonica cultivar-group)] (GB:NP_001041912.1); similar to hypothetical protein [Platanus x acerifolia] (GB:CAL07978.1); contains domain FAMILY NOT NAMED (PTHR13448); contains domain gb def: Hypothetical protein F5A18.5 (F15H11.2 protein) (Hypothetical protein At1g70770) (PTHR134…	2717.06	1768.97
Brapa_ESTC001287	AT4G37670	Symbols: | GCN5-related N-acetyltransferase (GNAT) family protein / amino acid kinase family protein | chr4:17696173-17698830 REVERSE	898.309	1226.97
Brapa_ESTC001288	AT2G15320	Symbols: | leucine-rich repeat family protein | chr2:6673609-6674757 REVERSE	18423.2	5111.45
Brapa_ESTC001289	AT3G59300	Symbols: | similar to unknown protein [Arabidopsis thaliana] (TAIR:AT5G24060.1); similar to expressed protein [Oryza sativa (japonica cultivar-group)] (GB:ABA94153.2); similar to Os01g0899500 [Oryza sativa (japonica cultivar-group)] (GB:NP_001045101.1) | chr3:21929644-21932854 FORWARD	759.625	2498.87
Brapa_ESTC001290	AT5G43460	Symbols: | lesion inducing protein-related | chr5:17477235-17478720 FORWARD	23289.8	25538
Brapa_ESTC001291	AT3G11120	Symbols: | 60S ribosomal protein L41 (RPL41E) | chr3:3481134-3481310 FORWARD	24596	32644.4
Brapa_ESTC001292	AT4G33000	Symbols: ATCBL10, CBL10 | CBL10 (calcineurin B-like protein 10); calcium ion binding | chr4:15924824-15926401 FORWARD	1371.14	4940.38
Brapa_ESTC001293	AT3G08520	Symbols: | 60S ribosomal protein L41 (RPL41D) | chr3:2586038-2586212 FORWARD	8253.83	16669.7
Brapa_ESTC001294	AT1G55450	Symbols: | embryo-abundant protein-related | chr1:20708940-20710491 REVERSE	1479.88	2333.23
Brapa_ESTC001295	AT2G35960	Symbols: NHL12 | NHL12 (NDR1/HIN1-like 12) | chr2:15114229-15114861 FORWARD	19261.4	38458.1
Brapa_ESTC001296	AT4G12545	Symbols: | protease inhibitor/seed storage/lipid transfer protein (LTP) family protein | chr4:7434257-7434583 FORWARD	2140.13	48.7141
Brapa_ESTC001298	AT1G49245	Symbols: | contains InterPro domain Prefoldin; (InterPro:IPR009053) | chr1:18222529-18222753 FORWARD	4977.13	4618.85
Brapa_ESTC001299	AT1G10480	Symbols: ZFP5 | ZFP5 (ZINC FINGER PROTEIN 5); nucleic acid binding / transcription factor/ zinc ion binding | chr1:3449735-3450370 FORWARD	10.8997	17.151
Brapa_ESTC001300	AT3G28940	Symbols: | avirulence-responsive protein, putative / avirulence induced gene (AIG) protein, putative | chr3:10969561-10970548 REVERSE	6918.72	27699.4
Brapa_ESTC001301	AT5G18230	Symbols: | transcription regulator NOT2/NOT3/NOT5 family protein | chr5:6021612-6027033 REVERSE	1745.69	1621.02
Brapa_ESTC001302	AT2G36410	Symbols: | similar to unknown protein [Arabidopsis thaliana] (TAIR:AT3G52920.2); similar to hypothetical protein [Ipomoea trifida] (GB:AAS79606.1); contains InterPro domain Prefoldin; (InterPro:IPR009053); contains InterPro domain Protein of unknown function DUF662; (InterPro:IPR007033) | chr2:15286120-15287349 FORWARD	1689.3	1889.45
Brapa_ESTC001303	AT5G10390	| Symbols: | histone H3 | chr5:3269066-3269476 REVERSE	971.131	383.06
Brapa_ESTC001304	AT2G40765	Symbols: | similar to Ubiquinol-cytochrome c reductase complex 6.7 kDa protein (CR6) (GB:P48505) | chr2:17019379-17020159 FORWARD	1566.75	2546.66
Brapa_ESTC001305	AT5G20820	Symbols: | auxin-responsive protein-related | chr5:7046913-7047296 REVERSE	529.601	274.583
Brapa_ESTC001306	AT2G40880	Symbols: FL3-27 | FL3-27; cysteine protease inhibitor | chr2:17064541-17065008 FORWARD	728.595	372.002
Brapa_ESTC001307	AT1G65310	Symbols: ATXTH17 | ATXTH17 (XYLOGLUCAN ENDOTRANSGLUCOSYLASE/HYDROLASE 17); hydrolase, acting on glycosyl bonds | chr1:24260925-24261982 FORWARD	11668.1	2064.72
Brapa_ESTC001308	AT3G09350	Symbols: | armadillo/beta-catenin repeat family protein | chr3:2871222-2873115 FORWARD	114.342	97.6011
Brapa_ESTC001309	AT1G80750	Symbols: | 60S ribosomal protein L7 (RPL7A) | chr1:30353944-30355326 FORWARD	2989.17	4117.5
Brapa_ESTC001310	AT5G20290	Symbols: | 40S ribosomal protein S8 (RPS8A) | chr5:6851697-6853014 REVERSE	37713.7	29670.9
Brapa_ESTC001311	AT5G43470	Symbols: HRT, RCY1, RPP8 | RPP8 (RECOGNITION OF PERONOSPORA PARASITICA 8) | chr5:17480358-17483886 REVERSE	5358.64	8263.36
Brapa_ESTC001312	AT5G27670	| Symbols: | histone H2A, putative | chr5:9792810-9793368 REVERSE	1001.96	493.523
Brapa_ESTC001313	AT2G02100	Symbols: LCR69, PDF2.2 | LCR69/PDF2.2 (Low-molecular-weight cysteine-rich 69); protease inhibitor | chr2:528396-528884 FORWARD	27567.6	32874.9
Brapa_ESTC001314	AT1G80840	Symbols: ATWRKY40, WRKY40 | WRKY40 (WRKY DNA-binding protein 40); transcription factor | chr1:30388726-30390248 FORWARD	9414.15	5088.39
Brapa_ESTC001316	AT5G01650	Symbols: | macrophage migration inhibitory factor family protein / MIF family protein | chr5:242731-244030 REVERSE	15043.4	7439.95
Brapa_ESTC001317	AT1G15120	Symbols: | ubiquinol-cytochrome C reductase complex 7.8 kDa protein, putative / mitochondrial hinge protein, putative | chr1:5203086-5203892 FORWARD	4092.86	9751.39
Brapa_ESTC001318	AT4G39200	Symbols: | 40S ribosomal protein S25 (RPS25E) | chr4:18257458-18258458 FORWARD	12261.9	16291.2
Brapa_ESTC001319	AT3G56150	Symbols: ATEIF3C-1, EIF3C-1, ATTIF3C1, TIF3C1, EIF3C | EIF3C (EUKARYOTIC TRANSLATION INITIATION FACTOR 3) | chr3:20844769-20847799 REVERSE	8496.61	5403.89
Brapa_ESTC001320	AT2G22330	Symbols: CYP79B3 | CYP79B3 (cytochrome P450, family 79, subfamily B, polypeptide 3); oxygen binding | chr2:9495681-9498063 FORWARD	9.8663	9.6034
Brapa_ESTC001322	AT1G11545	Symbols: | xyloglucan:xyloglucosyl transferase, putative / xyloglucan endotransglycosylase, putative / endo-xyloglucan transferase, putative | chr1:3878689-3880286 REVERSE	1319.71	2840.82
Brapa_ESTC001323	AT1G09690	Symbols: | 60S ribosomal protein L21 (RPL21C) | chr1:3136409-3137432 REVERSE	21237.3	26701.8
Brapa_ESTC001324	AT1G23780	| Symbols: | F-box family protein | chr1:8407042-8408469 REVERSE	842.212	123.982
Brapa_ESTC001325	AT5G57655	Symbols: | xylose isomerase family protein | chr5:23364256-23367031 FORWARD	3629.93	6005.19
Brapa_ESTC001326	no_hits_f	---------	1080.38	1837.4
Brapa_ESTC001327	AT5G23240	Symbols: | DNAJ heat shock N-terminal domain-containing protein | chr5:7826860-7828537 REVERSE	10831.8	3074.95
Brapa_ESTC001328	AT5G56760	Symbols: SAT5, SAT-52, AtSerat1;1 | AtSerat1;1 (SERINE ACETYLTRANSFERASE 52); serine O-acetyltransferase | chr5:22978724-22979808 REVERSE	19669.3	33772.9
Brapa_ESTC001329	no_hits_f	---------	230.921	1236.39
Brapa_ESTC001330	AT5G67030	Symbols: LOS6, NPQ2, ATABA1, ZEP, IBS3, ATZEP, ABA1 | ABA1 (ABA DEFICIENT 1); zeaxanthin epoxidase | chr5:26770971-26774316 REVERSE	17478.2	8672.8
Brapa_ESTC001331	AT4G30440	Symbols: GAE1 | GAE1 (UDP-D-GLUCURONATE 4-EPIMERASE 1); UDP-glucuronate 4-epimerase/ catalytic | chr4:14881982-14883271 REVERSE	1792.46	1054.01
Brapa_ESTC001332	AT5G10860	Symbols: | CBS domain-containing protein | chr5:3429174-3430143 REVERSE	23754.6	15628.7
Brapa_ESTC001333	AT4G16080	Symbols: | similar to unknown protein [Arabidopsis thaliana] (TAIR:AT2G45940.1); contains InterPro domain Protein of unknown function DUF295; (InterPro:IPR005174) | chr4:9101475-9102624 REVERSE	1660.59	1009.32
Brapa_ESTC001334	AT1G15930	Symbols: | 40S ribosomal protein S12 (RPS12A) | chr1:5471696-5472735 FORWARD	16890.2	19526.1
Brapa_ESTC001335	AT3G27890	Symbols: NQR | NQR (NADPH:QUINONE OXIDOREDUCTASE); FMN reductase | chr3:10352044-10353175 REVERSE	6339.7	3243.48
Brapa_ESTC001336	AT3G18190	| Symbols: | chaperonin, putative | chr3:6232232-6233842 FORWARD	8223.9	4919.37
Brapa_ESTC001337	AT4G01480	Symbols: ATPPA5 | inorganic pyrophosphatase, putative (soluble) / pyrophosphate phospho-hydrolase, putative / PPase, putative | chr4:626539-627758 FORWARD	1604.62	1800.4
Brapa_ESTC001338	AT3G23810	Symbols: SAHH2 | SAHH2 (S-ADENOSYL-L-HOMOCYSTEINE (SAH) HYDROLASE 2); adenosylhomocysteinase | chr3:8588020-8589678 REVERSE	3533.12	752.473
Brapa_ESTC001339	AT5G03160	Symbols: | DNAJ heat shock N-terminal domain-containing protein | chr5:750285-752670 FORWARD	2917.72	3582.75
Brapa_ESTC001340	AT3G06790	Symbols: | plastid developmental protein DAG, putative | chr3:2144570-2145749 REVERSE	16699.2	4399.18
Brapa_ESTC001341	AT3G08890	Symbols: | similar to unknown protein [Arabidopsis thaliana] (TAIR:AT5G37070.1); similar to Protein of unknown function, DUF538 [Medicago truncatula] (GB:ABE91533.1); contains InterPro domain Protein of unknown function DUF538; (InterPro:IPR007493) | chr3:2706707-2707781 FORWARD	31909.4	41581.1
Brapa_ESTC001342	AT1G44575	Symbols: PSBS, NPQ4 | NPQ4 (NONPHOTOCHEMICAL QUENCHING) | chr1:16874208-16875634 FORWARD	5081.84	22660.1
Brapa_ESTC001343	AT1G68140	Symbols: | similar to unknown protein [Arabidopsis thaliana] (TAIR:AT1G77770.2); similar to Pm27 [Prunus mume] (GB:BAE48661.1); contains InterPro domain Protein of unknown function DUF1644; (InterPro:IPR012866) | chr1:25543073-25544077 REVERSE	794.338	897.106
Brapa_ESTC001344	AT1G51650	Symbols: | ATP synthase epsilon chain, mitochondrial | chr1:19156348-19157309 FORWARD	14584.2	19293.8
Brapa_ESTC001345	AT1G56000	| Symbols: | amine oxidase-related | chr1:20947814-20949766 FORWARD	170.731	160.064
Brapa_ESTC001346	AT1G11930	Symbols: | alanine racemase family protein | chr1:4028781-4030296 FORWARD	652.629	814.583
Brapa_ESTC001347	AT5G65530	Symbols: | protein kinase, putative | chr5:26208070-26210052 REVERSE	8532.43	8215.03
Brapa_ESTC001348	AT5G20165	Symbols: | similar to Os02g0299600 [Oryza sativa (japonica cultivar-group)] (GB:NP_001046617.1); similar to Os05g0251500 [Oryza sativa (japonica cultivar-group)] (GB:NP_001055030.1); similar to CG14199-PA [Drosophila melanogaster] (GB:NP_652499.1); contains InterPro domain Protein of unknown function DUF1242; (InterPro:IPR009653) | chr5:6805805-6806732 REVERSE	1280.52	1124.79
Brapa_ESTC001349	AT5G03140	Symbols: | lectin protein kinase family protein | chr5:737749-739884 REVERSE	138.753	79.8306
Brapa_ESTC001350	AT2G29320	Symbols: | tropinone reductase, putative / tropine dehydrogenase, putative | chr2:12599257-12600454 FORWARD	4120.6	11150.5
Brapa_ESTC001351	AT1G20620	Symbols: SEN2, CAT3 | CAT3 (CATALASE 3); catalase | chr1:7143132-7146183 FORWARD	1742.3	105.63
Brapa_ESTC001352	AT5G41130	| Symbols: | catalytic | chr5:16476942-16480469 REVERSE	129.333	279.841
Brapa_ESTC001353	AT2G21660	Symbols: GR-RBP7, CCR2, ATGRP7 | ATGRP7 (COLD, CIRCADIAN RHYTHM, AND RNA BINDING 2); RNA binding | chr2:9272557-9273396 REVERSE	52221.6	55109.8
Brapa_ESTC001354	AT2G22100	Symbols: | RNA recognition motif (RRM)-containing protein | chr2:9399477-9400625 REVERSE	1114.69	884.275
Brapa_ESTC001355	no_hits_f	---------	83.2529	290.858
Brapa_ESTC001356	no_hits_f	---------	20.8373	73.185
Brapa_ESTC001357	AT2G19760	Symbols: PFN1, PRF1 | PFN1/PRF1 (PROFILIN 1); actin binding | chr2:8524156-8525149 REVERSE	1950.82	1001.54
Brapa_ESTC001358	AT1G74950	Symbols: | similar to unknown protein [Arabidopsis thaliana] (TAIR:AT1G19180.1); similar to PnFL-2 [Ipomoea nil] (GB:AAG49896.1); contains InterPro domain ZIM; (InterPro:IPR010399) | chr1:28152580-28153919 REVERSE	14705.4	13823.6
Brapa_ESTC001359	AT5G38410	Symbols: | ribulose bisphosphate carboxylase small chain 3B / RuBisCO small subunit 3B (RBCS-3B) (ATS3B) | chr5:15394731-15395536 REVERSE	50835.5	56238.3
Brapa_ESTC001360	AT4G25550	Symbols: | similar to ATCFIM-25/CFIM-25 (ARABIDOPSIS HOMOLOG OF CFIM-25) [Arabidopsis thaliana] (TAIR:AT4G29820.1); similar to OSJNBa0032F06.22 [Oryza sativa (japonica cultivar-group)] (GB:CAE03439.1); similar to Os04g0683100 [Oryza sativa (japonica cultivar-group)] (GB:NP_001054301.1); similar to H0124B04.17 [Oryza sativa (indica cultivar-group)] (GB:CAJ86300.1); contains domain PRE-MRNA CLEAVAG…	659.676	224.264
Brapa_ESTC001361	AT4G01870	| Symbols: | tolB protein-related | chr4:808473-810431 REVERSE	16889.8	15264.6
Brapa_ESTC001362	AT3G59810	Symbols: | small nuclear ribonucleoprotein F, putative / U6 snRNA-associated Sm-like protein, putative / Sm protein F, putative | chr3:22107818-22108643 FORWARD	16556.2	22424.7
Brapa_ESTC001363	AT1G20090	Symbols: ARAC4, ROP2, ATROP2, ATRAC4 | ARAC4/ATRAC4/ATROP2/ROP2 (rho-related protein from plants 2); GTP binding | chr1:6967214-6968594 FORWARD	1298.82	4426.42
Brapa_ESTC001364	AT3G21610	Symbols: | similar to unknown protein [Arabidopsis thaliana] (TAIR:AT1G67600.1); similar to Acid phosphatase/vanadium-dependent haloperoxidase related [Medicago truncatula] (GB:ABD32415.1); contains InterPro domain Acid phosphatase/vanadium-dependent haloperoxidase; (InterPro:IPR008934); contains InterPro domain Acid phosphatase/vanadium-dependent haloperoxidase related; (InterPro:IPR003832) | ch…	2442.14	775.398
Brapa_ESTC001365	AT4G10850	Symbols: | nodulin MtN3 family protein | chr4:6675064-6676714 FORWARD	453.121	733.877
Brapa_ESTC001366	AT5G04140	Symbols: GLS1, GLUS, GLU1 | GLU1 (FERREDOXIN-DEPENDENT GLUTAMATE SYNTHASE 1) | chr5:1130032-1138187 FORWARD	428.326	1871.52
Brapa_ESTC001367	AT3G17465	Symbols: RPL3P | RPL3P (ribosomal protein large subunit 3P); structural constituent of ribosome | chr3:5978065-5979578 REVERSE	7293.01	2685.81
Brapa_ESTC001368	AT3G09860	| Symbols: | unknown protein | chr3:3026145-3027005 FORWARD	11184.9	25435
Brapa_ESTC001369	AT3G53730	| Symbols: | histone H4 | chr3:19923637-19923948 REVERSE	12049.9	11609.7
Brapa_ESTC001370	no_hits_f	---------	232.659	417.937
Brapa_ESTC001371	AT4G37830	Symbols: | cytochrome c oxidase-related | chr4:17787666-17788756 REVERSE	445.38	232.73
Brapa_ESTC001372	AT3G57870	Symbols: EMB1637, AHUS5 | AHUS5 (EMBRYO DEFECTIVE 1637); ubiquitin-protein ligase | chr3:21439808-21441087 REVERSE	11478.6	14338.9
Brapa_ESTC001373	AT1G23410	Symbols: | ubiquitin extension protein, putative / 40S ribosomal protein S27A (RPS27aA) | chr1:8314929-8315399 FORWARD	18513.5	19130.4
Brapa_ESTC001374	AT1G04480	Symbols: | 60S ribosomal protein L23 (RPL23A) | chr1:1216109-1217256 FORWARD	6777.94	4096.44
Brapa_ESTC001375	AT2G45070	Symbols: SEC61 BETA | SEC61 BETA (suppressors of secretion-defective 61 Beta) | chr2:18594283-18594531 REVERSE	48201.2	61165.1
Brapa_ESTC001376	AT5G64140	Symbols: RPS28 | RPS28 (RIBOSOMAL PROTEIN S28); structural constituent of ribosome | chr5:25684755-25684949 REVERSE	6210.98	6389.28
Brapa_ESTC001377	AT5G18800	Symbols: | NADH-ubiquinone oxidoreductase 19 kDa subunit (NDUFA8) family protein | chr5:6267306-6268395 FORWARD	1204.28	1689.72
Brapa_ESTC001378	no_hits_f	---------	787.396	1018.87
Brapa_ESTC001379	AT3G23390	Symbols: | 60S ribosomal protein L36a/L44 (RPL36aA) | chr3:8375434-8376231 FORWARD	14318.5	29824.9
Brapa_ESTC001380	AT3G57320	Symbols: | similar to Os07g0661700 [Oryza sativa (japonica cultivar-group)] (GB:NP_001060540.1) | chr3:21221061-21221651 FORWARD	4115.19	3945.74
Brapa_ESTC001381	no_hits_f	---------	23470	38725.7
Brapa_ESTC001382	AT5G57785	Symbols: | contains InterPro domain Helix-loop-helix DNA-binding; (InterPro:IPR011598) | chr5:23426331-23426552 REVERSE	765.38	1892.47
Brapa_ESTC001383	AT1G11475	Symbols: | DNA-directed RNA polymerase II, putative | chr1:3862520-3863805 FORWARD	3693.75	7496.55
Brapa_ESTC001384	no_hits_f	---------	1235.21	2663.39
Brapa_ESTC001385	AT5G04080	Symbols: | similar to unknown protein [Oryza sativa (japonica cultivar-group)] (GB:BAD87214.1) | chr5:1104816-1105187 FORWARD	2537.37	19497.1
Brapa_ESTC001386	AT3G18410	Symbols: | NADH-ubiquinone oxidoreductase-related | chr3:6323209-6323767 FORWARD	5569.01	6344.06
Brapa_ESTC001387	AT1G67430	Symbols: | 60S ribosomal protein L17 (RPL17B) | chr1:25265872-25267290 FORWARD	6960.66	11234.1
Brapa_ESTC001388	AT4G16720	Symbols: | 60S ribosomal protein L15 (RPL15A) | chr4:9400178-9401337 REVERSE	33825.4	34013.4
Brapa_ESTC001389	AT5G15600	Symbols: SP1L4 | SP1L4 (SPIRAL1-LIKE4) | chr5:5078408-5078866 FORWARD	5919.08	3514.05
Brapa_ESTC001390	AT5G18070	Symbols: | DRT101 (DNA-DAMAGE-REPAIR/TOLERATION 101); intramolecular transferase, phosphotransferases | chr5:5981119-5982789 FORWARD	1091.59	714.881
Brapa_ESTC001391	AT4G16450	Symbols: | similar to Os08g0431500 [Oryza sativa (japonica cultivar-group)] (GB:NP_001061863.1); similar to unknown protein [Oryza sativa (japonica cultivar-group)] (GB:BAC99342.1) | chr4:9280154-9280563 FORWARD	2822	6092.84
Brapa_ESTC001392	AT1G45145	Symbols: ATH5, LIV1, ATTRX5 | ATTRX5 (thioredoxin H-type 5); thiol-disulfide exchange intermediate | chr1:17077704-17078696 REVERSE	102.351	509.619
Brapa_ESTC001393	AT5G47700	Symbols: | 60S acidic ribosomal protein P1 (RPP1C) | chr5:19345245-19345950 REVERSE	28300.5	31118.2
Brapa_ESTC001394	AT5G59613	Symbols: | similar to unknown protein [Arabidopsis thaliana] (TAIR:AT3G46430.1); similar to mitochondrial ATP synthase 6 KD subunit [Oryza sativa (japonica cultivar-group)] (GB:BAB21526.1) | chr5:24033388-24033726 REVERSE	22667.7	29177.5
Brapa_ESTC001395	AT3G07568	| Symbols: | unknown protein | chr3:2416500-2417758 REVERSE	690.712	1000.28
Brapa_ESTC001396	AT3G21055	Symbols: PSBTN | PSBTN (photosystem II subunit T) | chr3:7376767-7377078 REVERSE	6316.32	26251.7
Brapa_ESTC001397	AT1G12060	Symbols: ATBAG5 | ATBAG5 (ARABIDOPSIS THALIANA BCL-2-ASSOCIATED ATHANOGENE 5); protein binding | chr1:4076332-4077022 FORWARD	254.438	82.2456
Brapa_ESTC001398	AT1G29965	Symbols: | 60S ribosomal protein L18A (RPL18aA) | chr1:10498442-10499357 REVERSE	4916.44	5867.44
Brapa_ESTC001399	AT1G27330	Symbols: | similar to unknown protein [Arabidopsis thaliana] (TAIR:AT1G27350.1); similar to membrane protein [Brassica juncea] (GB:AAT38818.1); contains InterPro domain Ribosome associated membrane RAMP4; (InterPro:IPR010580) | chr1:9493051-9493885 FORWARD	31923	42787.1
Brapa_ESTC001400	AT1G75690	Symbols: | chaperone protein dnaJ-related | chr1:28425934-28426831 REVERSE	12376.5	30647.1
Brapa_ESTC001401	AT3G29170	Symbols: | similar to unknown protein [Arabidopsis thaliana] (TAIR:AT2G19350.1); similar to expressed protein [Oryza sativa (japonica cultivar-group)] (GB:ABA91365.1); contains InterPro domain Protein of unknown function DUF872, eukaryotic; (InterPro:IPR008590) | chr3:11137477-11138779 REVERSE	786.898	907.145
Brapa_ESTC001402	AT4G14320	Symbols: | 60S ribosomal protein L36a/L44 (RPL36aB) | chr4:8242680-8243801 REVERSE	16187.3	21005.8
Brapa_ESTC001403	AT5G65360	| Symbols: | histone H3 | chr5:26137325-26137735 REVERSE	7085.7	8755.13
Brapa_ESTC001405	AT5G09830	Symbols: | BolA-like family protein | chr5:3057817-3058770 REVERSE	2999.31	4897.17
Brapa_ESTC001406	AT4G13520	Symbols: SMAP1 | SMAP1 (SMALL ACIDIC PROTEIN 1) | chr4:7864458-7864646 FORWARD	6130.14	8396.76
Brapa_ESTC001407	AT1G78210	Symbols: | hydrolase, alpha/beta fold family protein | chr1:29427713-29429187 REVERSE	312.77	198.268
Brapa_ESTC001408	AT3G22480	Symbols: | prefoldin-related KE2 family protein | chr3:7969087-7969533 FORWARD	12704.1	15200.4
Brapa_ESTC001410	AT5G17280	Symbols: | similar to oxidoreductase [Trypanosoma cruzi strain CL Brener] (GB:XP_808855.1); similar to Os09g0530900 [Oryza sativa (japonica cultivar-group)] (GB:NP_001063752.1) | chr5:5686357-5686764 FORWARD	312.317	148.316
Brapa_ESTC001411	AT5G04250	Symbols: | OTU-like cysteine protease family protein | chr5:1176398-1178493 FORWARD	1238.54	1686.29
Brapa_ESTC001412	AT2G41630	Symbols: TFIIB | TFIIB (TRANSCRIPTION FACTOR II B); RNA polymerase II transcription factor | chr2:17362633-17364478 REVERSE	502.231	95.8396
Brapa_ESTC001413	AT2G35470	Symbols: | similar to unknown [Solanum tuberosum] (GB:ABC01887.1) | chr2:14916093-14916799 REVERSE	4016.36	2760.73
Brapa_ESTC001414	AT3G04400	Symbols: EMB2171 | EMB2171 (EMBRYO DEFECTIVE 2171); structural constituent of ribosome | chr3:1167345-1168314 FORWARD	54961.7	48741.9
Brapa_ESTC001415	AT3G62630	Symbols: | similar to calmodulin-binding protein [Arabidopsis thaliana] (TAIR:AT2G15760.1); similar to conserved hypothetical protein [Medicago truncatula] (GB:ABE84267.1); contains InterPro domain Protein of unknown function DUF1645; (InterPro:IPR012442) | chr3:23174913-23176055 REVERSE	1366.07	590.068
Brapa_ESTC001417	AT4G01900	Symbols: P11, GLB1 | GLB1 (glutamine synthetase B1) | chr4:821736-823294 FORWARD	90.7861	367.452
Brapa_ESTC001418	AT1G14830	Symbols: ADL5, ADL1C | ADL1C (DYNAMIN-LIKE PROTEIN 5); GTP binding / GTPase | chr1:5107694-5111465 REVERSE	2035.62	2633.17
Brapa_ESTC001419	AT2G34420	Symbols: LHCB1.5, LHB1B2 | LHB1B2 (Photosystem II light harvesting complex gene 1.5); chlorophyll binding | chr2:14529795-14530592 REVERSE	32705.7	34808.1
Brapa_ESTC001420	AT1G15740	Symbols: | leucine-rich repeat family protein | chr1:5411504-5414539 FORWARD	1502.27	430.943
Brapa_ESTC001421	no_hits_f	---------	1853.86	1972.84
Brapa_ESTC001422	AT1G09180	Symbols: ATSARA1A, ATSAR1 | ATSAR1/ATSARA1A (ARABIDOPSIS THALIANA SECRETION-ASSOCIATED RAS SUPER FAMILY 1); GTP binding | chr1:2965149-2965943 FORWARD	5345.39	6073.72
Brapa_ESTC001423	AT5G48150	Symbols: PAT1 | PAT1 (PHYTOCHROME A SIGNAL TRANSDUCTION 1); transcription factor | chr5:19539723-19541279 REVERSE	10806	12224.3
Brapa_ESTC001424	AT5G64090	Symbols: | similar to unknown protein [Arabidopsis thaliana] (TAIR:AT5G21050.1); similar to Os11g0169600 [Oryza sativa (japonica cultivar-group)] (GB:NP_001065852.1); similar to expressed protein [Oryza sativa (japonica cultivar-group)] (GB:ABA91611.2) | chr5:25665295-25666641 FORWARD	2543.37	942.728
Brapa_ESTC001425	AT4G25900	Symbols: | aldose 1-epimerase family protein | chr4:13161496-13163406 FORWARD	2237.48	2523.5
Brapa_ESTC001426	AT1G14790	Symbols: ATRDRP1, RDR1 | RDR1 (RNA-DEPENDENT RNA POLYMERASE 1); RNA-directed RNA polymerase/ nucleic acid binding | chr1:5094312-5097812 REVERSE	17637	10398.7
Brapa_ESTC001427	AT5G57860	Symbols: | ubiquitin family protein | chr5:23455217-23456313 FORWARD	6768.9	9013.99
Brapa_ESTC001428	AT4G35000	Symbols: APX3 | APX3 (ASCORBATE PEROXIDASE 3); L-ascorbate peroxidase | chr4:16665012-16667546 REVERSE	11652.8	21350.9
Brapa_ESTC001429	AT5G23950	Symbols: | C2 domain-containing protein | chr5:8082792-8083451 FORWARD	5606.85	428.269
Brapa_ESTC001430	AT3G04780	Symbols: | Encodes a protein with little sequence identity with any other protein of known structure or function. Part of this protein shows a 42% sequence identity with the C-terminal domain of the 32-kD human thioredoxin-like protein. | chr3:1311453-1313019 REVERSE	6522.6	10625.3
Brapa_ESTC001431	AT1G06760	| Symbols: | histone H1, putative | chr1:2076686-2077615 REVERSE	6058.1	6593.65
Brapa_ESTC001432	AT5G59870	Symbols: | histone H2A, putative | chr5:24132831-24133370 REVERSE	11862.5	6281.7
Brapa_ESTC001433	AT1G31812	Symbols: ACBP | ACBP (ACYL-COA-BINDING PROTEIN); acyl-CoA binding | chr1:11411113-11412080 REVERSE	2256.25	2226.7
Brapa_ESTC001434	AT1G31812	Symbols: ACBP | ACBP (ACYL-COA-BINDING PROTEIN); acyl-CoA binding | chr1:11411113-11412080 REVERSE	4703.65	4609.58
Brapa_ESTC001435	AT1G77940	Symbols: | 60S ribosomal protein L30 (RPL30B) | chr1:29309010-29310182 REVERSE	16641.7	19461.1
Brapa_ESTC001436	AT3G20670	| Symbols: | histone H2A, putative | chr3:7229478-7229969 FORWARD	2265.4	1873.63
Brapa_ESTC001437	AT2G37600	Symbols: | 60S ribosomal protein L36 (RPL36A) | chr2:15781488-15782281 REVERSE	8076.31	12700.6
Brapa_ESTC001438	no_hits_f	---------	3140.07	1798.35
Brapa_ESTC001439	AT3G53730	| Symbols: | histone H4 | chr3:19923637-19923948 REVERSE	1356.9	1021.02
Brapa_ESTC001440	no_hits_f	---------	2545.27	1748.66
Brapa_ESTC001441	AT5G59690	| Symbols: | histone H4 | chr5:24068875-24069186 FORWARD	10482.5	11207.7
Brapa_ESTC001442	AT5G14030	Symbols: | translocon-associated protein beta (TRAPB) family protein | chr5:4526880-4528255 FORWARD	2555.42	2949.14
Brapa_ESTC001443	AT1G34030	Symbols: | 40S ribosomal protein S18 (RPS18B) | chr1:12370265-12371445 REVERSE	9997.18	5427.02
Brapa_ESTC001445	AT5G11740	Symbols: ATAGP15, AGP15 | AGP15 (ARABINOGALACTAN PROTEIN 15) | chr5:3784319-3784504 FORWARD	13201.9	8412.36
Brapa_ESTC001446	no_hits_f	---------	113.495	174.235
Brapa_ESTC001447	AT3G07230	Symbols: | wound-responsive protein-related | chr3:2299926-2300189 FORWARD	4645.38	6870.51
Brapa_ESTC001449	ATMG00030	Symbols: ORF107A | Identical to Hypothetical mitochondrial protein AtMg00030 (ORF107a) [Arabidopsis Thaliana] (GB:P93276); similar to hypothetical protein NitaMp027 [Nicotiana tabacum] (GB:YP_173374.1) | chrM:11918-12241 FORWARD	4376.35	4885.19
Brapa_ESTC001450	AT5G22880	| Symbols: | histone H2B, putative | chr5:7652133-7652570 REVERSE	2423.9	3488.71
Brapa_ESTC001451	AT1G65720	Symbols: | similar to Os03g0110300 [Oryza sativa (japonica cultivar-group)] (GB:NP_001048714.1); similar to Unknown protein [Oryza sativa (japonica cultivar-group)] (GB:AAN61478.1) | chr1:24444134-24444676 REVERSE	4037.68	932.824
Brapa_ESTC001452	AT3G48660	Symbols: | similar to unknown protein [Arabidopsis thaliana] (TAIR:AT5G63500.1); similar to hypothetical protein [Phaseolus vulgaris] (GB:AAQ09000.1) | chr3:18040644-18041118 FORWARD	2035.81	2757.5
Brapa_ESTC001453	AT5G11070	Symbols: | similar to unknown protein [Arabidopsis thaliana] (TAIR:AT5G35090.1) | chr5:3516441-3516899 REVERSE	7508.7	1684.09
Brapa_ESTC001454	AT3G52590	Symbols: EMB2167, ERD16, UBQ1 | UBQ1 (EARLY-RESPONSIVE TO DEHYDRATION 16, UBIQUITIN EXTENSION PROTEIN 1); protein binding | chr3:19516646-19517659 FORWARD	551.421	67.5882
Brapa_ESTC001455	AT3G23670	Symbols: PAKRP1L | PAKRP1L; microtubule motor | chr3:8519297-8525062 FORWARD	214.239	251.316
Brapa_ESTC001456	no_hits_f	---------	1361.57	2716.65
Brapa_ESTC001457	AT1G51650	Symbols: | ATP synthase epsilon chain, mitochondrial | chr1:19156348-19157309 FORWARD	10332.4	15305.7
Brapa_ESTC001458	AT5G04800	Symbols: | structural constituent of ribosome | chr5:1389218-1389643 FORWARD	12845.3	11132.6
Brapa_ESTC001459	AT2G37600	Symbols: | 60S ribosomal protein L36 (RPL36A) | chr2:15781488-15782281 REVERSE	22855.2	26240.5
Brapa_ESTC001460	no_hits_f	---------	161.022	283.431
Brapa_ESTC001461	AT2G28600	Symbols: | ATP binding / ATP-dependent helicase/ nucleic acid binding | chr2:12258922-12261749 FORWARD	5441.54	7049.55
Brapa_ESTC001462	AT4G31840	Symbols: | plastocyanin-like domain-containing protein | chr4:15401804-15402432 FORWARD	352.971	593.108
Brapa_ESTC001463	AT3G62840	Symbols: | similar to small nuclear ribonucleoprotein D2, putative / snRNP core protein D2, putative / Sm protein D2, putative [Arabidopsis thaliana] (TAIR:AT2G47640.4); similar to Os05g0314100 [Oryza sativa (japonica cultivar-group)] (GB:NP_001055168.1); similar to putative small nuclear ribonucleoprotein D2 [Oryza sativa (japonica cultivar-group)] (GB:AAV32147.1); contains InterPro domain Like-…	27974.9	30792.2
Brapa_ESTC001464	AT5G37480	Symbols: | similar to Os03g0748600 [Oryza sativa (japonica cultivar-group)] (GB:NP_001051270.1) | chr5:14901707-14902747 REVERSE	1464	1350.34
Brapa_ESTC001465	AT2G33340	Symbols: | transducin family protein / WD-40 repeat family protein | chr2:14133540-14138076 REVERSE	1400.82	713.664
Brapa_ESTC001466	AT3G08770	Symbols: LTP6 | LTP6 (Lipid transfer protein 6); lipid binding | chr3:2664355-2664790 REVERSE	724.413	487.143
Brapa_ESTC001467	no_hits_f	---------	4563.96	11007.3
Brapa_ESTC001468	no_hits_f	---------	2029.81	3510.59
Brapa_ESTC001469	AT1G15120	Symbols: | ubiquinol-cytochrome C reductase complex 7.8 kDa protein, putative / mitochondrial hinge protein, putative | chr1:5203086-5203892 FORWARD	15843.8	22639.4
Brapa_ESTC001470	no_hits_f	---------	6975.92	6216.68
Brapa_ESTC001471	AT1G52300	Symbols: | 60S ribosomal protein L37 (RPL37B) | chr1:19478882-19479821 REVERSE	8076.26	7051.08
Brapa_ESTC001472	ATCG01020	Symbols: RPL32 | encodes a chloroplast ribosomal protein L32, a constituent of the large subunit of the ribosomal complex | chrC:113449-113607 FORWARD	18614.6	27928.1
Brapa_ESTC001473	no_hits_f	---------	778.081	756.137
Brapa_ESTC001474	AT4G03090	Symbols: | similar to NDX1 homeobox protein [Lotus japonicus] (GB:CAA09791.1) | chr4:1366495-1370937 REVERSE	1440.36	2106.29
Brapa_ESTC001475	AT5G64160	Symbols: | similar to Os02g0753200 [Oryza sativa (japonica cultivar-group)] (GB:NP_001048144.1) | chr5:25688167-25689544 FORWARD	799.119	1020.52
Brapa_ESTC001476	AT2G43550	Symbols: | trypsin inhibitor, putative | chr2:18080340-18080728 FORWARD	811.766	413.508
Brapa_ESTC001477	no_hits_f	---------	203.262	204.35
Brapa_ESTC001478	AT2G46330	Symbols: ATAGP16, AGP16 | AGP16 (ARABINOGALACTAN PROTEIN 16) | chr2:19025803-19026181 REVERSE	14066.7	35545.6
Brapa_ESTC001479	AT2G36950	Symbols: | heavy-metal-associated domain-containing protein | chr2:15522295-15523833 FORWARD	162.812	60.3978
Brapa_ESTC001480	ATCG00470	| Symbols: ATPE | ATPase epsilon subunit | chrC:52265-52663 REVERSE	55396.4	44336.5
Brapa_ESTC001481	AT4G37660	Symbols: | ribosomal protein L12 family protein | chr4:17695537-17696040 FORWARD	3297.77	664.832
Brapa_ESTC001482	AT2G33830	Symbols: | dormancy/auxin associated family protein | chr2:14316844-14317362 REVERSE	50737	53137.5
Brapa_ESTC001483	AT1G66240	Symbols: ATX1 | ATX1; metal ion binding | chr1:24690108-24690990 REVERSE	22095.8	18141.1
Brapa_ESTC001484	AT3G23390	Symbols: | 60S ribosomal protein L36a/L44 (RPL36aA) | chr3:8375434-8376231 FORWARD	30193	40764.7
Brapa_ESTC001485	no_hits_f	---------	526.289	500.554
Brapa_ESTC001486	no_hits_f	---------	79.8402	86.7287
Brapa_ESTC001487	AT5G06480	Symbols: | MD-2-related lipid recognition domain-containing protein / ML domain-containing protein | chr5:1976220-1977232 REVERSE	11049	8744.88
Brapa_ESTC001488	no_hits_f	---------	1719.65	3396.38
Brapa_ESTC001489	no_hits_f	---------	320.275	208.045
Brapa_ESTC001490	AT5G56680	Symbols: EMB2755 | EMB2755 (EMBRYO DEFECTIVE 2755); ATP binding / aminoacyl-tRNA ligase/ asparagine-tRNA ligase/ aspartate-tRNA ligase/ nucleic acid binding | chr5:22953871-22956067 FORWARD	6756.14	4771.66
Brapa_ESTC001491	AT1G08880	| Symbols: | histone H2A, putative | chr1:2847147-2847679 REVERSE	16214.9	9056.67
Brapa_ESTC001492	AT3G53020	Symbols: RPL24B, RPL24, STV1 | STV1 (SHORT VALVE1); structural constituent of ribosome | chr3:19671727-19672890 REVERSE	20207	31698.1
Brapa_ESTC001493	no_hits_f	---------	2553.38	2623.1
Brapa_ESTC001494	AT5G55280	Symbols: ATFTSZ1-1, CPFTSZ, FTSZ1-1 | FTSZ1-1 (FtsZ1-1); structural molecule | chr5:22437966-22439753 REVERSE	2733.79	9727.52
Brapa_ESTC001495	AT2G27385	Symbols: | similar to unknown protein [Arabidopsis thaliana] (TAIR:AT5G22430.1) | chr2:11723775-11724396 REVERSE	4978.78	10377.8
Brapa_ESTC001496	AT5G44170	Symbols: | similar to unknown protein [Arabidopsis thaliana] (TAIR:AT1G08125.1); similar to Os05g0564100 [Oryza sativa (japonica cultivar-group)] (GB:NP_001056330.1); similar to DNA ligase-like [Oryza sativa (japonica cultivar-group)] (GB:BAD22961.1); contains domain no description (G3D.3.40.50.150); contains domain Diol dehydratase, gamma subunit (SSF47148); contains domain UNCHARACTERIZED (PTHR…	720.434	781.365
Brapa_ESTC001497	AT3G09500	Symbols: | 60S ribosomal protein L35 (RPL35A) | chr3:2917053-2917901 FORWARD	946.394	4005.16
Brapa_ESTC001499	AT5G08290	Symbols: YLS8 | YLS8 (yellow-leaf-specific gene 8); catalytic | chr5:2666044-2666937 FORWARD	12342.6	8753.48
Brapa_ESTC001500	ATCG00140	| Symbols: ATPH | ATPase III subunit | chrC:13262-13507 REVERSE	3745.77	5765.03
Brapa_ESTC001501	AT3G02730	Symbols: TRXF1, ATF1 | ATF1/TRXF1 (THIOREDOXIN F-TYPE 1); thiol-disulfide exchange intermediate | chr3:588577-589598 REVERSE	7389.67	30025.3
Brapa_ESTC001502	AT5G48485	Symbols: DIR1 | DIR1 (DEFECTIVE IN INDUCED RESISTANCE 1); lipid binding | chr5:19663543-19663851 REVERSE	25667.1	32317.1
Brapa_ESTC001503	AT2G36620	Symbols: RPL24A | RPL24A (RIBOSOMAL PROTEIN L24); structural constituent of ribosome | chr2:15357627-15358898 REVERSE	11006.2	11360.7
Brapa_ESTC001504	AT1G70600	Symbols: | 60S ribosomal protein L27A (RPL27aC) | chr1:26624831-26625271 REVERSE	29137.5	16615.1
Brapa_ESTC001505	AT1G52300	Symbols: | 60S ribosomal protein L37 (RPL37B) | chr1:19478882-19479821 REVERSE	13128	12019.9
Brapa_ESTC001506	no_hits_f	---------	63.2283	155.486
Brapa_ESTC001507	no_hits_f	---------	6955.68	9845.75
Brapa_ESTC001508	AT5G61170	Symbols: | 40S ribosomal protein S19 (RPS19C) | chr5:24628384-24629428 FORWARD	5423.41	11907.3
Brapa_ESTC001509	AT1G13060	Symbols: PBE1 | PBE1 (20S proteasome beta subunit E1); peptidase | chr1:4452639-4454661 FORWARD	16050.3	10684
Brapa_ESTC001510	no_hits_f	---------	2335.92	2593.5
Brapa_ESTC001511	no_hits_f	---------	1580.05	2401.49
Brapa_ESTC001512	no_hits_f	---------	99.9002	131.348
Brapa_ESTC001513	no_hits_f	---------	371.903	300.98
Brapa_ESTC001514	AT4G29410	Symbols: | 60S ribosomal protein L28 (RPL28C) | chr4:14468445-14469970 REVERSE	1658.09	5152.95
Brapa_ESTC001515	AT5G11280	Symbols: | similar to unknown protein [Arabidopsis thaliana] (TAIR:AT1G80200.1); similar to Ankyrin [Medicago truncatula] (GB:ABE78998.1) | chr5:3597322-3598348 FORWARD	4238.6	18588.3
Brapa_ESTC001516	AT1G72290	Symbols: | trypsin and protease inhibitor family protein / Kunitz family protein | chr1:27219514-27220161 FORWARD	481.138	1027.79
Brapa_ESTC001517	AT1G79040	Symbols: PSBR | PSBR (photosystem II subunit R) | chr1:29740978-29741674 FORWARD	5249.8	14685.2
Brapa_ESTC001518	AT3G56020	Symbols: | 60S ribosomal protein L41 (RPL41G) | chr3:20801805-20802022 REVERSE	52935.1	52991.3
Brapa_ESTC001519	no_hits_f	---------	369.291	260.167
Brapa_ESTC001520	AT4G33920	Symbols: | protein phosphatase 2C family protein / PP2C family protein | chr4:16260881-16262708 FORWARD	3736.63	940.244
Brapa_ESTC001521	AT3G12260	Symbols: | complex 1 family protein / LVR family protein | chr3:3909259-3910344 REVERSE	2030.92	2148.53
Brapa_ESTC001522	no_hits_f	---------	1054.26	765.596
Brapa_ESTC001523	no_hits_f	---------	28601.9	32218.8
Brapa_ESTC001524	AT2G27530	Symbols: | 60S ribosomal protein L10A (RPL10aB) | chr2:11770520-11771647 REVERSE	30465.4	30415.4
Brapa_ESTC001525	AT4G27230	Symbols: | histone H2A, putative | chr4:13637521-13638331 REVERSE	11219.9	21409
Brapa_ESTC001526	AT4G14620	Symbols: | similar to unknown protein [Arabidopsis thaliana] (TAIR:AT3G22970.1); similar to unknown protein [Oryza sativa (japonica cultivar-group)] (GB:AAP44687.1); similar to expressed protein [Oryza sativa (japonica cultivar-group)] (GB:AAT76408.1); similar to Os03g0796600 [Oryza sativa (japonica cultivar-group)] (GB:NP_001051556.1); contains InterPro domain Protein of unknown function DUF506,…	877.768	2616.86
Brapa_ESTC001527	AT3G09820	Symbols: ADK1 | ADK1 (ADENOSINE KINASE 1) | chr3:3012127-3014629 FORWARD	7990.48	10518.4
Brapa_ESTC001528	AT4G02970	Symbols: AT7SL-1 | AT7SL-1 (ARABIDOPSIS 7SL RNA 1) | chr4:1317499-1319179 FORWARD	12991.2	23766.5
Brapa_ESTC001529	AT2G47110	Symbols: UBQ6 | UBQ6 (ubiquitin 6); protein binding | chr2:19351771-19352244 FORWARD	17949.4	10385.1
Brapa_ESTC001530	AT3G15640	Symbols: | cytochrome c oxidase family protein | chr3:5299280-5301378 FORWARD	11315	4965.72
Brapa_ESTC001531	AT2G27960	Symbols: CKS1, CKS1AT | CKS1 (CDK-SUBUNIT 1); cyclin-dependent protein kinase | chr2:11917980-11918620 REVERSE	22702.5	23568.4
Brapa_ESTC001532	AT5G48760	Symbols: | 60S ribosomal protein L13A (RPL13aD) | chr5:19788541-19789912 REVERSE	7807.69	8163.58
Brapa_ESTC001533	AT3G09680	Symbols: | 40S ribosomal protein S23 (RPS23A) | chr3:2969202-2970296 REVERSE	30132.5	19718.3
Brapa_ESTC001534	AT5G59690	| Symbols: | histone H4 | chr5:24068875-24069186 FORWARD	2667.51	2876.24
Brapa_ESTC001535	AT1G51060	Symbols: | histone H2A, putative | chr1:18930616-18931111 FORWARD	10.3613	88.5828
Brapa_ESTC001536	AT4G28750	Symbols: PSAE-1 | PSAE-1 (PSA E1 KNOCKOUT) | chr4:14202957-14203894 REVERSE	772.919	4414.54
Brapa_ESTC001537	AT4G29480	Symbols: | mitochondrial ATP synthase g subunit family protein | chr4:14486271-14487263 REVERSE	3901.56	6363.56
Brapa_ESTC001539	AT1G18800	Symbols: NRP2 | NRP2 (NAP1-RELATED PROTEIN 2); DNA binding / chromatin binding / histone binding | chr1:6481457-6483454 REVERSE	22515.2	31537.2
Brapa_ESTC001540	no_hits_f	---------	16941	25874.3
Brapa_ESTC001541	AT3G18280	Symbols: | protease inhibitor/seed storage/lipid transfer protein (LTP) family protein | chr3:6267108-6267398 FORWARD	11752	13968.1
Brapa_ESTC001542	no_hits_f	---------	8441.14	13511.1
Brapa_ESTC001543	AT5G22880	| Symbols: | histone H2B, putative | chr5:7652133-7652570 REVERSE	4310.95	2294.23
Brapa_ESTC001544	AT5G63160	Symbols: BT1 | BT1 (BTB and TAZ domain protein 1); protein binding / transcription regulator | chr5:25350711-25352625 REVERSE	980.838	49.6217
Brapa_ESTC001545	AT1G09690	Symbols: | 60S ribosomal protein L21 (RPL21C) | chr1:3136409-3137432 REVERSE	11931.8	19899.9
Brapa_ESTC001546	AT1G55265	Symbols: | similar to unknown protein [Arabidopsis thaliana] (TAIR:AT5G19860.1); similar to Protein of unknown function DUF538 [Medicago truncatula] (GB:ABE78678.1); contains InterPro domain Protein of unknown function DUF538; (InterPro:IPR007493) | chr1:20620993-20621520 FORWARD	2289.23	607.608
Brapa_ESTC001547	AT5G59870	Symbols: | histone H2A, putative | chr5:24132831-24133370 REVERSE	5284.33	4418.14
Brapa_ESTC001548	AT3G15530	Symbols: | similar to unknown protein [Arabidopsis thaliana] (TAIR:AT5G54400.1); similar to conserved hypothetical protein [Chloroflexus aurantiacus J-10-fl] (GB:ZP_00766604.1); contains InterPro domain SAM (and some other nucleotide) binding motif; (InterPro:IPR000051); contains InterPro domain Methyltransferase type 11; (InterPro:IPR013216); contains InterPro domain Generic methyltransferase; (…	89.7598	35.2626
Brapa_ESTC001550	AT4G18905	Symbols: | transducin family protein / WD-40 repeat family protein | chr4:10360245-10363002 FORWARD	1586.1	2889.94
Brapa_ESTC001551	AT3G06700	Symbols: | structural constituent of ribosome | chr3:2117525-2117806 REVERSE	49011.2	52909.8
Brapa_ESTC001552	AT1G20225	Symbols: | similar to unknown protein [Arabidopsis thaliana] (TAIR:AT1G76020.1); similar to unknown [Solanum tuberosum] (GB:ABB55396.1); contains InterPro domain Thioredoxin-like fold; (InterPro:IPR012336); contains InterPro domain Thioredoxin fold; (InterPro:IPR012335) | chr1:7007957-7009309 REVERSE	2697.13	5443.06
Brapa_ESTC001553	AT1G66100	| Symbols: | thionin, putative | chr1:24609539-24610136 REVERSE	140.335	122.875
Brapa_ESTC001554	AT4G33560	Symbols: | similar to wound-responsive protein-related [Arabidopsis thaliana] (TAIR:AT2G14070.1) | chr4:16135468-16135755 FORWARD	1701.12	1555.33
Brapa_ESTC001555	AT5G27850	Symbols: | 60S ribosomal protein L18 (RPL18C) | chr5:9873173-9874301 FORWARD	40950.6	42909.6
Brapa_ESTC001556	AT3G18740	Symbols: | 60S ribosomal protein L30 (RPL30C) | chr3:6453443-6453876 FORWARD	19109.1	19381.2
Brapa_ESTC001557	AT5G08300	Symbols: | succinyl-CoA ligase (GDP-forming) alpha-chain, mitochondrial, putative / succinyl-CoA synthetase, alpha chain, putative / SCS-alpha, putative | chr5:2667580-2669673 FORWARD	187.5	532.134
Brapa_ESTC001558	AT4G16760	Symbols: ATACX1, ACX1 | ACX1 (ACYL-COA OXIDASE 1) | chr4:9424918-9428710 REVERSE	1158.6	244.992
Brapa_ESTC001559	AT5G03850	Symbols: | 40S ribosomal protein S28 (RPS28B) | chr5:1028541-1028735 REVERSE	14213.1	13282.7
Brapa_ESTC001560	AT5G59890	Symbols: ADF4 | ADF4 (ACTIN DEPOLYMERIZING FACTOR 4); actin binding | chr5:24139771-24140822 FORWARD	5411.58	7240.89
Brapa_ESTC001561	AT1G20693	Symbols: HMG BETA 1, NFD2, NFD02, HMGB2 | HMGB2 (HIGH MOBILITY GROUP B 2); transcription factor | chr1:7177272-7178477 FORWARD	22556.6	25899.6
Brapa_ESTC001562	no_hits_f	---------	1948.82	2575.5
Brapa_ESTC001563	AT3G18880	Symbols: | ribosomal protein S17 family protein | chr3:6509594-6510075 FORWARD	9392.26	2098.5
Brapa_ESTC001564	no_hits_f	---------	17387.3	5971.98
Brapa_ESTC001566	AT1G33140	Symbols: | 60S ribosomal protein L9 (RPL90A/C) | chr1:12023340-12024482 FORWARD	19513.6	21288
Brapa_ESTC001567	AT1G02780	Symbols: EMB2386 | EMB2386 (EMBRYO DEFECTIVE 2386); structural constituent of ribosome | chr1:608120-609391 REVERSE	11756.9	9810.68
Brapa_ESTC001569	AT5G12190	Symbols: | RNA recognition motif (RRM)-containing protein | chr5:3940732-3941106 REVERSE	13036.9	19725.1
Brapa_ESTC001570	AT3G53890	Symbols: | 40S ribosomal protein S21 (RPS21B) | chr3:19966560-19967027 REVERSE	34330.3	45099.9
Brapa_ESTC001571	AT5G56600	Symbols: PFN3, PRF3 | PFN3/PRF3 (PROFILIN 3); actin binding | chr5:22927108-22928047 REVERSE	5740.11	7728
Brapa_ESTC001572	AT4G32960	Symbols: | similar to unknown protein [Arabidopsis thaliana] (TAIR:AT4G32970.1); similar to PREDICTED: similar to MGC84305 protein [Strongylocentrotus purpuratus] (GB:XP_793273.1); similar to Os06g0150100 [Oryza sativa (japonica cultivar-group)] (GB:NP_001056821.1) | chr4:15908788-15910144 REVERSE	6282.04	14320.7
Brapa_ESTC001573	AT5G59613	Symbols: | similar to unknown protein [Arabidopsis thaliana] (TAIR:AT3G46430.1); similar to mitochondrial ATP synthase 6 KD subunit [Oryza sativa (japonica cultivar-group)] (GB:BAB21526.1) | chr5:24033388-24033726 REVERSE	7676.95	3207.02
Brapa_ESTC001574	AT3G55640	Symbols: | mitochondrial substrate carrier family protein | chr3:20651027-20653390 FORWARD	2599.15	2301.13
Brapa_ESTC001575	AT4G14800	Symbols: PBD2 | PBD2 (20S PROTEASOME BETA SUBUNIT 2); peptidase | chr4:8500393-8502053 FORWARD	9943.38	9507.51
Brapa_ESTC001576	AT3G12390	Symbols: | nascent polypeptide associated complex alpha chain protein, putative / alpha-NAC, putative | chr3:3942351-3943602 FORWARD	21298.5	25574.3
Brapa_ESTC001577	AT1G56045	Symbols: | ribosomal protein L41 family protein | chr1:20966351-20966933 FORWARD	22874.7	34081.7
Brapa_ESTC001578	AT1G27435	Symbols: | similar to Os12g0477600 [Oryza sativa (japonica cultivar-group)] (GB:NP_001066758.1) | chr1:9527943-9528801 REVERSE	2792.8	9448.14
Brapa_ESTC001579	AT4G24030	| Symbols: | unknown protein | chr4:12486257-12486643 REVERSE	21664.6	4850.8
Brapa_ESTC001580	AT4G20150	Symbols: | similar to unknown protein [Phytophthora infestans] (GB:AAY43427.1); similar to Os07g0498300 [Oryza sativa (japonica cultivar-group)] (GB:NP_001059709.1) | chr4:10888539-10889510 REVERSE	1439.21	2842.05
Brapa_ESTC001581	AT4G38680	Symbols: CSDP2, GRP2 | GRP2 (COLD SHOCK DOMAIN PROTEIN 2); nucleic acid binding | chr4:18072234-18072845 REVERSE	4075.53	4368.01
Brapa_ESTC001582	AT2G17710	Symbols: | similar to Os04g0560700 [Oryza sativa (japonica cultivar-group)] (GB:NP_001053549.1) | chr2:7700938-7701636 FORWARD	4058.4	3691.2
Brapa_ESTC001583	AT5G10390	| Symbols: | histone H3 | chr5:3269066-3269476 REVERSE	4879.05	5843.75
Brapa_ESTC001584	AT2G18290	Symbols: | anaphase-promoting complex, subunit 10 family / APC10 family | chr2:7955604-7957178 REVERSE	8568.14	10424.2
Brapa_ESTC001585	AT1G27595	Symbols: | similar to ESP4 (ENHANCED SILENCING PHENOTYPE 4), binding [Arabidopsis thaliana] (TAIR:AT5G01400.1); similar to Os07g0693900 [Oryza sativa (japonica cultivar-group)] (GB:NP_001060734.1); similar to symplekin [Xenopus tropicalis] (GB:NP_989259.1); contains domain ARM repeat (SSF48371); contains domain gb def: T22C5.3 (PTHR15245:SF6); contains domain FAMILY NOT NAMED (PTHR15245) | chr1:9…	452.824	2795.58
Brapa_ESTC001586	AT5G15950	Symbols: | adenosylmethionine decarboxylase | chr5:5206709-5207797 FORWARD	12864.4	9729.29
Brapa_ESTC001587	AT5G61790	| Symbols: | calnexin 1 (CNX1) | chr5:24844620-24846868 REVERSE	11355	16832.5
Brapa_ESTC001588	AT3G11940	Symbols: AML1, ATRPS5A | ATRPS5A (RIBOSOMAL PROTEIN 5A); structural constituent of ribosome | chr3:3778181-3779360 REVERSE	23402.6	11735
Brapa_ESTC001589	AT5G09310	Symbols: | Identical to Gamma-secretase subunit PEN2-like protein [Arabidopsis Thaliana] (GB:Q9FY84); similar to presenilin enhancer 2 homolog [Rattus norve (GB:NP_001008764.1); similar to Os01g0960000 [Oryza sativa (japonica cultivar-group)] (GB:NP_001045463.1); similar to Presenilin enhancer 2 homolog [Danio rerio] (GB:AAH92674.1); contains domain FAMILY NOT NAMED (PTHR16318) | chr5:2887404-288…	4820.63	5735.45
Brapa_ESTC001590	AT3G44620	Symbols: | protein tyrosine phosphatase | chr3:16204845-16206409 FORWARD	1541.27	4445.99
Brapa_ESTC001591	AT5G64130	Symbols: | similar to unknown protein [Arabidopsis thaliana] (TAIR:AT1G69510.2); similar to Os01g0249300 [Oryza sativa (japonica cultivar-group)] (GB:NP_001042590.1); similar to unknown protein [Oryza sativa (japonica cultivar-group)] (GB:BAD72346.1); similar to Os01g0664500 [Oryza sativa (japonica cultivar-group)] (GB:NP_001043793.1); contains InterPro domain Lg106-like; (InterPro:IPR012482) | c…	4410.1	7191.95
Brapa_ESTC001592	AT1G52300	Symbols: | 60S ribosomal protein L37 (RPL37B) | chr1:19478882-19479821 REVERSE	8445.89	9240.74
Brapa_ESTC001593	AT5G51720	Symbols: | similar to zinc finger, CDGSH-type domain 2 [Homo sapiens] (GB:NP_001008389.1); similar to Os07g0467200 [Oryza sativa (japonica cultivar-group)] (GB:NP_001059590.1); similar to hypothetical protein [Homo sapiens] (GB:CAD97935.1); contains InterPro domain Zinc finger, CDGSH-type; (InterPro:IPR006622) | chr5:21026871-21027453 FORWARD	1834.41	11976.1
Brapa_ESTC001594	AT5G09480	Symbols: | hydroxyproline-rich glycoprotein family protein | chr5:2951182-2951616 REVERSE	10.9206	18.8195
Brapa_ESTC001595	AT2G19750	Symbols: | 40S ribosomal protein S30 (RPS30A) | chr2:8522119-8522888 FORWARD	24955.9	22970.1
Brapa_ESTC001596	AT2G15970	Symbols: WCOR413, WCOR413-LIKE, ATCOR413-PM1, FL3-5A3, COR413-PM1 | COR413-PM1 (cold regulated 413 plasma membrane 1) | chr2:6957245-6958094 FORWARD	32360.5	24724.4
Brapa_ESTC001597	AT1G16210	Symbols: | similar to cupin family protein [Arabidopsis thaliana] (TAIR:AT2G18540.1); similar to H0211B05.1 [Oryza sativa (indica cultivar-group)] (GB:CAH67164.1); similar to Os04g0561600 [Oryza sativa (japonica cultivar-group)] (GB:NP_001053553.1); contains InterPro domain Protein of unknown function DUF1014; (InterPro:IPR010422); contains InterPro domain High mobility group box; (InterPro:IPR00…	15426.7	8523.89
Brapa_ESTC001598	AT3G26110	Symbols: | similar to BCP1 (Brassica campestris pollen protein 1) [Arabidopsis thaliana] (TAIR:AT1G24520.1); similar to Anther-specific protein BCP1 (GB:P41507); contains InterPro domain Virulence factor, pectin lyase fold; (InterPro:IPR011050) | chr3:9542810-9543196 FORWARD	7.9708	7.8857
Brapa_ESTC001599	AT2G02100	Symbols: LCR69, PDF2.2 | LCR69/PDF2.2 (Low-molecular-weight cysteine-rich 69); protease inhibitor | chr2:528396-528884 FORWARD	8806.07	8675.72
Brapa_ESTC001600	AT5G25300	| Symbols: | F-box family protein | chr5:8780261-8782847 FORWARD	5491.42	1986.51
Brapa_ESTC001601	AT3G50590	Symbols: | transducin family protein / WD-40 repeat family protein | chr3:18782273-18790201 FORWARD	559.956	111.778
Brapa_ESTC001603	AT1G35680	Symbols: | 50S ribosomal protein L21, chloroplast / CL21 (RPL21) | chr1:13209989-13211458 FORWARD	4418.54	3943.62
Brapa_ESTC001604	no_hits_f	---------	8567.82	7880.83
Brapa_ESTC001605	AT5G53650	Symbols: | similar to Os05g0535700 [Oryza sativa (japonica cultivar-group)] (GB:NP_001056158.1) | chr5:21808491-21809468 FORWARD	11408.2	15613.6
Brapa_ESTC001606	AT2G44650	Symbols: CPN10, CHL-CPN10 | CHL-CPN10 (chloroplast chaperonin 10) | chr2:18426597-18427586 REVERSE	6987	16448.6
Brapa_ESTC001607	AT3G58670	Symbols: | similar to unknown protein [Arabidopsis thaliana] (TAIR:AT2G42670.1); similar to OSJNBb0040D15.1 [Oryza sativa (japonica cultivar-group)] (GB:CAE04411.2); similar to Os04g0151900 [Oryza sativa (japonica cultivar-group)] (GB:NP_001052116.1); similar to H0820C10.4 [Oryza sativa (indica cultivar-group)] (GB:CAH65971.1); contains InterPro domain Protein of unknown function DUF1637; (InterP…	330.758	898.004
Brapa_ESTC001608	AT1G66200	Symbols: ATGSR2 | ATGSR2 (Arabidopsis thaliana glutamine synthase clone R2); glutamate-ammonia ligase | chr1:24659183-24661183 REVERSE	177.953	334.138
Brapa_ESTC001609	AT2G20740	Symbols: | similar to unknown protein [Arabidopsis thaliana] (TAIR:AT2G20230.1); similar to Os04g0679900 [Oryza sativa (japonica cultivar-group)] (GB:NP_001054283.1); similar to H0801D08.19 [Oryza sativa (indica cultivar-group)] (GB:CAJ86261.1) | chr2:8942869-8944373 FORWARD	9105.74	2607.21
Brapa_ESTC001610	AT5G62690	Symbols: TUB2 | TUB2 (Tubulin beta-2); structural molecule | chr5:25198786-25200727 FORWARD	378.324	688.142
Brapa_ESTC001611	AT1G24510	Symbols: | T-complex protein 1 epsilon subunit, putative / TCP-1-epsilon, putative / chaperonin, putative | chr1:8685492-8688089 REVERSE	12820.5	6485.94
Brapa_ESTC001612	AT5G17770	Symbols: CBR1, ATCBR | ATCBR (NADH:CYTOCHROME B5 REDUCTASE 1) | chr5:5864545-5866497 REVERSE	2113.63	2669.39
Brapa_ESTC001613	AT1G67250	Symbols: | proteasome maturation factor UMP1 family protein | chr1:25167471-25168630 REVERSE	1421.86	3214.81
Brapa_ESTC001614	AT3G27690	Symbols: LHCB2.3, LHCB2:4 | LHCB2:4 (Photosystem II light harvesting complex gene 2.3); chlorophyll binding | chr3:10257239-10258158 FORWARD	6170.1	8269.52
Brapa_ESTC001615	AT2G40010	Symbols: | 60S acidic ribosomal protein P0 (RPP0A) | chr2:16715656-16717526 REVERSE	9129.67	6018
Brapa_ESTC001616	AT5G17170	Symbols: | rubredoxin family protein | chr5:5649337-5650977 FORWARD	2797.42	20945.9
Brapa_ESTC001617	AT1G78080	Symbols: RAP2.4 | RAP2.4 (related to AP2 4); DNA binding / transcription factor | chr1:29369683-29370687 FORWARD	5209.74	4095.73
Brapa_ESTC001618	AT1G29930	Symbols: AB140, CAB140, LHCB1.3, CAB1 | CAB1 (CHLOROPHYLL A/B BINDING PROTEIN 1); chlorophyll binding | chr1:10478055-10478858 FORWARD	29711.7	46909
Brapa_ESTC001619	AT1G77840	Symbols: | eukaryotic translation initiation factor 5, putative / eIF-5, putative | chr1:29273981-29275294 FORWARD	3513.49	2139.61
Brapa_ESTC001620	no_hits_f	---------	764.227	7808.11
Brapa_ESTC001621	AT2G39780	Symbols: RNS2 | RNS2 (RIBONUCLEASE 2); endoribonuclease | chr2:16598334-16600593 FORWARD	12018.8	5202.55
Brapa_ESTC001623	AT1G63290	Symbols: | ribulose-phosphate 3-epimerase, cytosolic, putative / pentose-5-phosphate 3-epimerase, putative | chr1:23475760-23477255 REVERSE	26718.2	16424.5
Brapa_ESTC001624	no_hits_f	---------	4283.6	2325.49
Brapa_ESTC001625	AT2G01450	Symbols: ATMPK17 | ATMPK17 (Arabidopsis thaliana MAP kinase 17); MAP kinase | chr2:199721-202009 REVERSE	2105.31	3159.37
Brapa_ESTC001626	AT4G22240	Symbols: | plastid-lipid associated protein PAP, putative | chr4:11766102-11767239 REVERSE	2190.75	1817.79
Brapa_ESTC001627	AT1G76140	| Symbols: | prolyl oligopeptidase | chr1:28576081-28579746 FORWARD	1689.99	705.729
Brapa_ESTC001628	AT3G10920	Symbols: MEE33, MSD1 | MSD1 (MANGANESE SUPEROXIDE DISMUTASE 1); manganese superoxide dismutase | chr3:3418020-3419586 FORWARD	2812.53	1356.93
Brapa_ESTC001629	AT2G34430	Symbols: LHCB1.4, LHB1B1 | LHB1B1 (Photosystem II light harvesting complex gene 1.4); chlorophyll binding | chr2:14531897-14532697 FORWARD	37624.7	57169.5
Brapa_ESTC001630	AT3G43720	Symbols: | protease inhibitor/seed storage/lipid transfer protein (LTP) family protein | chr3:15626536-15628086 REVERSE	4952.88	2812.54
Brapa_ESTC001631	AT1G12710	Symbols: ATPP2-A12 | ATPP2-A12 (Phloem protein 2-A12) | chr1:4326978-4328322 REVERSE	2132.97	211.027
Brapa_ESTC001632	AT4G31985	Symbols: | 60S ribosomal protein L39 (RPL39C) | chr4:15469937-15470372 FORWARD	3541.91	3588.08
Brapa_ESTC001633	AT2G36160	Symbols: | 40S ribosomal protein S14 (RPS14A) | chr2:15177004-15178238 FORWARD	5486.49	1706.52
Brapa_ESTC001634	no_hits_f	---------	17290.7	12506.6
Brapa_ESTC001635	AT4G24540	Symbols: AGL24 | AGL24 (AGAMOUS-LIKE 24); transcription factor | chr4:12671170-12673655 REVERSE	6978.8	11195.6
Brapa_ESTC001636	AT3G04840	Symbols: | 40S ribosomal protein S3A (RPS3aA) | chr3:1329757-1331424 FORWARD	10825.5	13743.9
Brapa_ESTC001637	AT3G20650	Symbols: | mRNA capping enzyme family protein | chr3:7221174-7223945 REVERSE	1308.97	1389.96
Brapa_ESTC001638	AT3G07450	Symbols: | protease inhibitor/seed storage/lipid transfer protein (LTP) family protein | chr3:2383616-2383936 REVERSE	166.638	254.418
Brapa_ESTC001639	AT5G48760	Symbols: | 60S ribosomal protein L13A (RPL13aD) | chr5:19788541-19789912 REVERSE	5251.64	14682.6
Brapa_ESTC001640	AT5G15880	Symbols: | similar to unknown protein [Arabidopsis thaliana] (TAIR:AT2G32240.1); similar to hypothetical protein [Cleome spinosa] (GB:ABD96950.1); contains InterPro domain Prefoldin; (InterPro:IPR009053) | chr5:5185791-5187464 FORWARD	503.69	1585.65
Brapa_ESTC001641	AT1G07890	Symbols: MEE6, CS1, APX1 | APX1 (ASCORBATE PEROXIDASE 1, MATERNAL EFFECT EMBRYO ARREST 6) | chr1:2438002-2439432 FORWARD	38239.8	20717.1
Brapa_ESTC001642	no_hits_f	---------	15019.9	14564.8
Brapa_ESTC001643	AT5G24670	Symbols: | hydrolase/ zinc ion binding | chr5:8448883-8451049 FORWARD	232.582	195.662
Brapa_ESTC001644	AT4G24510	Symbols: VC2, VC-2, CER2 | CER2 (ECERIFERUM 2); transferase | chr4:12660939-12662547 FORWARD	100.876	80.7475
Brapa_ESTC001645	AT5G56670	Symbols: | 40S ribosomal protein S30 (RPS30C) | chr5:22952639-22953207 REVERSE	6085.4	8749.23
Brapa_ESTC001646	AT1G77750	Symbols: | 30S ribosomal protein S13, chloroplast, putative | chr1:29235240-29236384 REVERSE	11324.4	5909.52
Brapa_ESTC001647	AT5G39670	Symbols: | calcium-binding EF hand family protein | chr5:15900498-15901112 FORWARD	1126.2	4179.81
Brapa_ESTC001648	AT5G58070	| Symbols: | lipocalin, putative | chr5:23517738-23518382 REVERSE	43119.8	32079.4
Brapa_ESTC001649	AT3G61620	Symbols: RRP41 | RRP41 (Ribosomal RNA Processing 41); 3'-5'-exoribonuclease/ RNA binding | chr3:22812357-22813885 REVERSE	1938.61	632.969
Brapa_ESTC001650	AT3G50350	Symbols: | similar to unknown protein [Arabidopsis thaliana] (TAIR:AT4G33985.1); similar to Os04g0282200 [Oryza sativa (japonica cultivar-group)] (GB:NP_001052367.1); similar to Os02g0766600 [Oryza sativa (japonica cultivar-group)] (GB:NP_001048224.1); similar to hypothetical protein [Oryza sativa (japonica cultivar-group)] (GB:BAD19985.1); contains InterPro domain Protein of unknown function DUF…	155.333	69.523
Brapa_ESTC001651	AT1G27370	Symbols: | squamosa promoter-binding protein-like 10 (SPL10) | chr1:9505441-9506984 REVERSE	916.588	173.706
Brapa_ESTC001652	AT3G02580	Symbols: DWF7, BUL1 | STE1 (STEROL 1); C-5 sterol desaturase | chr3:547055-548622 FORWARD	4178.08	5312.13
Brapa_ESTC001653	AT2G17800	Symbols: ARAC1, ATGP2, ATRAC1, RAC1, ROP3, AtROP3 | ARAC1/ATGP2/ATRAC1/AtROP3/RAC1/ROP3 (Rho-related protein from plants 3) | chr2:7747395-7749024 FORWARD	351.568	596.169
Brapa_ESTC001654	AT1G67785	Symbols: | similar to Os01g0908400 [Oryza sativa (japonica cultivar-group)] (GB:NP_001045143.1); contains domain PH domain-like (SSF50729) | chr1:25419763-25420647 REVERSE	5615.2	8201.74
Brapa_ESTC001655	no_hits_f	---------	2108.26	11810.4
Brapa_ESTC001656	AT1G75380	Symbols: | wound-responsive protein-related | chr1:28285450-28287292 REVERSE	6024.66	6241.13
Brapa_ESTC001657	AT5G07600	Symbols: | oleosin / glycine-rich protein | chr5:2404653-2405482 REVERSE	23.9011	27.9874
Brapa_ESTC001658	no_hits_f	---------	434.358	718.337
Brapa_ESTC001659	no_hits_f	---------	920.99	2171.25
Brapa_ESTC001660	AT5G62290	Symbols: | nucleotide-sensitive chloride conductance regulator (ICln) family protein | chr5:25036794-25038198 FORWARD	4650.58	1504.81
Brapa_ESTC001661	AT5G11200	Symbols: | DEAD/DEAH box helicase, putative | chr5:3567390-3570687 FORWARD	8380.41	5070.68
Brapa_ESTC001662	AT5G65495	Symbols: | similar to unknown [Lycopersicon esculentum] (GB:AAK84472.1) | chr5:26197733-26198017 FORWARD	1735.54	2635.11
Brapa_ESTC001663	AT5G01960	Symbols: | zinc finger (C3HC4-type RING finger) family protein | chr5:370808-372772 FORWARD	2044.02	637.926
Brapa_ESTC001664	AT3G51590	Symbols: LTP12 | LTP12 (LIPID TRANSFER PROTEIN 12); lipid binding | chr3:19146807-19147633 REVERSE	9.3353	11.3308
Brapa_ESTC001665	no_hits_f	---------	10046.7	4849.87
Brapa_ESTC001666	AT3G10860	Symbols: | ubiquinol-cytochrome C reductase complex ubiquinone-binding protein, putative / ubiquinol-cytochrome C reductase complex 8.2 kDa protein, putative | chr3:3399820-3400519 FORWARD	4410.26	5540.04
Brapa_ESTC001667	AT4G30950	Symbols: FADC, SFD4, FAD6 | FAD6 (FATTY ACID DESATURASE 6); omega-6 fatty acid desaturase | chr4:15057284-15059679 REVERSE	8388.22	13037
Brapa_ESTC001668	AT3G51590	Symbols: LTP12 | LTP12 (LIPID TRANSFER PROTEIN 12); lipid binding | chr3:19146807-19147633 REVERSE	90.4977	75.3444
Brapa_ESTC001669	AT5G51020	Symbols: | similar to Protein of unknown function DUF1001 [Medicago truncatula] (GB:ABE80209.1); contains InterPro domain Protein of unknown function DUF1001; (InterPro:IPR010404) | chr5:20762786-20764391 REVERSE	3771.1	5577.23
Brapa_ESTC001670	AT2G44065	Symbols: | ribosomal protein L2 family protein | chr2:18235936-18237444 FORWARD	2656.51	4695.27
Brapa_ESTC001671	AT2G16770	Symbols: | DNA binding / transcription factor | chr2:7286941-7287899 FORWARD	4972.36	3275.7
Brapa_ESTC001672	AT1G16870	Symbols: | mitochondrial 28S ribosomal protein S29-related | chr1:5770957-5773150 REVERSE	408.217	175.274
Brapa_ESTC001673	AT2G03090	Symbols: EXP15, ATEXP15, ATHEXP ALPHA 1.3, ATEXPA15 | ATEXPA15 (ARABIDOPSIS THALIANA EXPANSIN A15) | chr2:917360-918553 REVERSE	182.994	252.824
Brapa_ESTC001674	AT2G20060	Symbols: | ribosomal protein L4 family protein | chr2:8666465-8668308 FORWARD	20449.3	32235.7
Brapa_ESTC001675	AT4G17810	Symbols: | nucleic acid binding / transcription factor/ zinc ion binding | chr4:9906931-9907545 FORWARD	442.213	1601.14
Brapa_ESTC001676	AT1G09960	Symbols: SUT4, ATSUT4, SUC4 | SUT4 (SUCROSE TRANSPORTER 4); carbohydrate transporter/ sucrose:hydrogen symporter/ sugar porter | chr1:3244260-3246720 FORWARD	872.708	849.132
Brapa_ESTC001677	AT2G23790	Symbols: | similar to transcription factor [Arabidopsis thaliana] (TAIR:AT4G36820.1); similar to Os10g0501500 [Oryza sativa (japonica cultivar-group)] (GB:NP_001064986.1); similar to Protein of unknown function DUF607 [Medicago truncatula] (GB:ABE78504.1); similar to Os03g0233000 [Oryza sativa (japonica cultivar-group)] (GB:NP_001049472.1); contains InterPro domain Protein of unknown function DUF…	2599.19	906.03
Brapa_ESTC001678	AT5G05380	Symbols: | prenylated rab acceptor (PRA1) family protein | chr5:1592215-1592868 FORWARD	183.45	40.5517
Brapa_ESTC001679	AT5G12140	Symbols: ATCYS1 | ATCYS1 (A. THALIANA CYSTATIN-1); cysteine protease inhibitor | chr5:3923296-3923937 REVERSE	30656.8	24804.1
Brapa_ESTC001680	AT5G10480	Symbols: PEP, PAS2 | PAS2 (PASTICCINO 2) | chr5:3298048-3300049 REVERSE	272.509	2498.17
Brapa_ESTC001681	no_hits_f	---------	10201	12035.6
Brapa_ESTC001682	AT3G14850	Symbols: | similar to unknown protein [Arabidopsis thaliana] (TAIR:AT1G29050.1); similar to Os01g0652100 [Oryza sativa (japonica cultivar-group)] (GB:NP_001043736.1); similar to Protein of unknown function DUF231, plant [Medicago truncatula] (GB:ABE82889.1); contains InterPro domain Protein of unknown function DUF231, plant; (InterPro:IPR004253) | chr3:4995622-4997618 FORWARD	468.225	302.151
Brapa_ESTC001683	no_hits_f	---------	42360.9	51571.6
Brapa_ESTC001684	AT1G15820	Symbols: CP24, LHCB6 | LHCB6 (LIGHT HARVESTING COMPLEX PSII); chlorophyll binding | chr1:5446680-5447671 REVERSE	1944.64	3632.2
Brapa_ESTC001685	AT3G04400	Symbols: EMB2171 | EMB2171 (EMBRYO DEFECTIVE 2171); structural constituent of ribosome | chr3:1167345-1168314 FORWARD	27760.3	31037.6
Brapa_ESTC001686	AT3G20310	Symbols: ATERF-7, ATERF7, ERF7 | ERF7 (ETHYLINE RESPONSE FACTOR7); DNA binding / protein binding / transcription factor/ transcriptional repressor | chr3:7085963-7086697 REVERSE	239.378	133.934
Brapa_ESTC001687	AT1G50940	Symbols: ETFALPHA | ETFALPHA (ELECTRON TRANSFER FLAVOPROTEIN ALPHA); FAD binding / electron carrier | chr1:18881706-18883607 REVERSE	4966.64	11025
Brapa_ESTC001688	AT3G07950	Symbols: | rhomboid protein-related | chr3:2531988-2534283 FORWARD	8412.56	6966.46
Brapa_ESTC001689	AT2G33800	Symbols: | ribosomal protein S5 family protein | chr2:14308001-14309428 REVERSE	10168.8	17516.4
Brapa_ESTC001690	AT3G48890	Symbols: ATMAPR3, ATMP2 | ATMP2 (ARABIDOPSIS THALIANA MEMBRANE-ASSOCIATED PROGESTERONE BINDING PROTEIN 3); heme binding / transition metal ion binding | chr3:18140654-18142338 FORWARD	3002.45	1259.54
Brapa_ESTC001691	AT5G19190	Symbols: | similar to unknown protein [Arabidopsis thaliana] (TAIR:AT3G06070.1); similar to hypothetical protein MtrDRAFT_AC152499g26v1 [Medicago truncatula] (GB:ABE77806.1) | chr5:6457351-6457920 FORWARD	3007.8	2068.03
Brapa_ESTC001692	AT3G63170	Symbols: | similar to unknown protein [Arabidopsis thaliana] (TAIR:AT2G26310.1); similar to putative chalcone isomerase [Lycopersicon esculentum] (GB:AAQ55182.1); similar to Os07g0571600 [Oryza sativa (japonica cultivar-group)] (GB:NP_001060052.1) | chr3:23345650-23346968 FORWARD	929.957	1588.61
Brapa_ESTC001693	AT4G17940	| Symbols: | binding | chr4:9965799-9966790 FORWARD	5091.65	9647.92
Brapa_ESTC001694	AT4G24820	Symbols: | 26S proteasome regulatory subunit, putative (RPN7) | chr4:12790481-12792609 REVERSE	4712.32	8843.76
Brapa_ESTC001695	AT3G28840	Symbols: | similar to unknown protein [Arabidopsis thaliana] (TAIR:AT3G28780.1); similar to EBNA-1 [Human herpesvirus 4] (GB:ABB89251.1); contains InterPro domain Protein of unknown function DUF1216; (InterPro:IPR009605) | chr3:10839706-10840971 FORWARD	717.413	790.046
Brapa_ESTC001696	AT1G55330	Symbols: ATAGP21, AGP21 | AGP21 (ARABINOGALACTAN PROTEIN 21) | chr1:20652300-20652476 REVERSE	11628.3	12104.2
Brapa_ESTC001697	AT3G60750	Symbols: | transketolase, putative | chr3:22464979-22467799 FORWARD	6209.44	47569.8
Brapa_ESTC001698	AT3G04460	Symbols: PEX12, ATPEX12, APM4 | APM4/ATPEX12/PEX12 (PEROXIN-12) | chr3:1186647-1189100 FORWARD	167.038	159.785
Brapa_ESTC001699	AT1G22140	Symbols: | contains domain ZINC FINGER-CONTAINING PROTEIN P48ZNF (PTHR12681) | chr1:7815147-7815566 REVERSE	5545.72	10745.5
Brapa_ESTC001700	AT2G35700	Symbols: | AP2 domain-containing transcription factor, putative | chr2:15012284-15012868 FORWARD	873.854	819.567
Brapa_ESTC001701	AT5G56760	Symbols: SAT5, SAT-52, AtSerat1;1 | AtSerat1;1 (SERINE ACETYLTRANSFERASE 52); serine O-acetyltransferase | chr5:22978724-22979808 REVERSE	201.81	1094.36
Brapa_ESTC001702	AT3G22290	Symbols: | similar to unknown protein [Arabidopsis thaliana] (TAIR:AT1G36050.1); similar to PREDICTED: hypothetical protein [Strongylocentrotus purpuratus] (GB:XP_792057.2); similar to Os03g0784400 [Oryza sativa (japonica cultivar-group)] (GB:NP_001051473.1); similar to Os04g0455900 [Oryza sativa (japonica cultivar-group)] (GB:NP_001052965.1); contains InterPro domain Protein of unknown function …	6281.33	4744.97
Brapa_ESTC001703	AT5G07240	Symbols: IQD24 | IQD24 (IQ-domain 24); calmodulin binding | chr5:2272029-2274052 FORWARD	2949.73	4772.08
Brapa_ESTC001704	AT4G39680	Symbols: | SAP domain-containing protein | chr4:18414598-18416932 REVERSE	8077.55	4784.85
Brapa_ESTC001705	AT4G37560	Symbols: | formamidase, putative / formamide amidohydrolase, putative | chr4:17646483-17648451 FORWARD	132.668	718.864
Brapa_ESTC001706	AT1G27710	| Symbols: | glycine-rich protein | chr1:9642537-9643175 FORWARD	11434.2	10498.9
Brapa_ESTC001708	AT4G24440	Symbols: | transcription initiation factor IIA gamma chain / TFIIA-gamma (TFIIA-S) | chr4:12633470-12634563 FORWARD	1780.24	2942.79
Brapa_ESTC001709	AT1G71130	Symbols: | AP2 domain-containing transcription factor, putative | chr1:26826539-26827024 FORWARD	5244.95	6234.68
Brapa_ESTC001710	AT1G31330	Symbols: PSAF | PSAF (photosystem I subunit F) | chr1:11214992-11215920 REVERSE	7801.13	19137.6
Brapa_ESTC001711	AT3G53340	Symbols: | CCAAT-box binding transcription factor, putative | chr3:19785360-19786969 REVERSE	224.57	131.231
Brapa_ESTC001712	AT3G55960	Symbols: | NLI interacting factor (NIF) family protein | chr3:20771776-20773871 REVERSE	5267.14	3187.73
Brapa_ESTC001713	AT5G24650	Symbols: | mitochondrial import inner membrane translocase subunit Tim17/Tim22/Tim23 family protein | chr5:8437126-8438862 FORWARD	1583.88	1948.82
Brapa_ESTC001714	AT1G19350	Symbols: BZR2, BES1 | BES1 (BRI1-EMS-SUPPRESSOR 1) | chr1:6688832-6690156 FORWARD	12648.8	15489.4
Brapa_ESTC001715	AT5G08040	Symbols: TOM5 | TOM5 (MITOCHONDRIAL IMPORT RECEPTOR SUBUNIT TOM5 HOMOLOG) | chr5:2577359-2578074 REVERSE	3005.67	4847.85
Brapa_ESTC001716	AT5G56150	Symbols: UBC30 | UBC30; ubiquitin-protein ligase | chr5:22746982-22748190 FORWARD	1171.43	2635.55
Brapa_ESTC001717	AT3G50820	Symbols: PSBO2, PSBO-2 | PSBO-2/PSBO2 (PHOTOSYSTEM II SUBUNIT O-2); oxygen evolving | chr3:18901989-18903292 REVERSE	22788.6	39222.7
Brapa_ESTC001718	AT2G34480	Symbols: | 60S ribosomal protein L18A (RPL18aB) | chr2:14539995-14541240 REVERSE	23792.2	25774.5
Brapa_ESTC001719	AT4G28080	| Symbols: | binding | chr4:13948999-13956718 REVERSE	239.837	631.95
Brapa_ESTC001720	AT3G50210	| Symbols: | oxidoreductase | chr3:18625320-18627211 REVERSE	1104.55	5092.22
Brapa_ESTC001721	AT5G50810	Symbols: TIM8 | TIM8 (Arabidopsis thaliana translocase inner membrane subunit 8); protein translocase | chr5:20693101-20693731 REVERSE	1780.65	2205.4
Brapa_ESTC001722	AT4G14300	Symbols: | heterogeneous nuclear ribonucleoprotein, putative / hnRNP, putative | chr4:8231175-8232781 FORWARD	25880.9	16284.6
Brapa_ESTC001723	AT3G56650	Symbols: | thylakoid lumenal 20 kDa protein | chr3:20995786-20996892 FORWARD	554.821	2557.53
Brapa_ESTC001724	AT3G46550	Symbols: SOS5 | SOS5 (SALT OVERLY SENSITIVE 5) | chr3:17147597-17148859 REVERSE	5770.72	1541.43
Brapa_ESTC001725	AT5G15650	Symbols: REVERSIBLY GLYCOSYLATED POLYPEPTIDE 2, RGP2 | RGP2 (Reversibly glycosylated polypeptide-3); DNA binding / alpha-1,4-glucan-protein synthase (UDP-forming) | chr5:5092206-5094096 FORWARD	2606.01	1290.48
Brapa_ESTC001726	AT5G63400	Symbols: ADK1 | ADK1 (ADENYLATE KINASE 1); adenylate kinase | chr5:25410500-25412043 REVERSE	9493.04	2671.92
Brapa_ESTC001727	AT1G13060	Symbols: PBE1 | PBE1 (20S proteasome beta subunit E1); peptidase | chr1:4452639-4454661 FORWARD	163.625	127.396
Brapa_ESTC001728	AT5G30490	Symbols: | similar to BCNT [Hyacinthus orientalis] (GB:AAT08752.1); similar to Os01g0328500 [Oryza sativa (japonica cultivar-group)] (GB:NP_001042916.1); contains InterPro domain Bucentaur or craniofacial development; (InterPro:IPR011421) | chr5:11629429-11631501 FORWARD	440.843	464.083
Brapa_ESTC001729	AT5G44540	Symbols: | tapetum-specific protein-related | chr5:17958514-17958873 REVERSE	478.568	483.149
Brapa_ESTC001730	AT5G52840	Symbols: | NADH-ubiquinone oxidoreductase-related | chr5:21430944-21432020 FORWARD	1875.18	1513.99
Brapa_ESTC001731	AT5G67370	Symbols: | similar to unknown protein [Arabidopsis thaliana] (TAIR:AT5G11840.1); similar to Protein of unknown function DUF1230 [Medicago truncatula] (GB:ABE85761.1); contains InterPro domain Protein of unknown function DUF1230; (InterPro:IPR009631) | chr5:26894893-26896691 REVERSE	193.713	1625.24
Brapa_ESTC001732	AT3G14080	Symbols: | small nuclear ribonucleoprotein, putative / snRNP, putative / Sm protein, putative | chr3:4667724-4668996 FORWARD	3260.82	9344.29
Brapa_ESTC001733	AT1G79830	Symbols: | similar to CIP1 (COP1-INTERACTIVE PROTEIN 1) [Arabidopsis thaliana] (TAIR:AT5G41790.1); similar to Os05g0559900 [Oryza sativa (japonica cultivar-group)] (GB:NP_001056303.1); similar to Tropomyosin; tRNA-binding arm; t-snare [Medicago truncatula] (GB:ABD32289.1); contains InterPro domain tRNA-binding arm; (InterPro:IPR010978); contains InterPro domain t-snare; (InterPro:IPR010989) | chr…	11309.4	8033.12
Brapa_ESTC001734	AT2G39730	Symbols: RCA | RCA (RUBISCO ACTIVASE) | chr2:16578252-16580423 REVERSE	27293.6	28175.9
Brapa_ESTC001735	AT1G09330	Symbols: | Identical to FAM18-like protein At1g09330 [Arabidopsis Thaliana] (GB:Q8LEK2;GB:Q9ZPZ2); similar to Os01g0331900 [Oryza sativa (japonica cultivar-group)] (GB:NP_001042930.1); similar to Os05g0159100 [Oryza sativa (japonica cultivar-group)] (GB:NP_001054714.1); similar to FAM18-like protein CG5021 (GB:Q8IQC1); contains InterPro domain Protein of unknown function DUF846, eukaryotic; (Inte…	557.398	173.932
Brapa_ESTC001736	AT3G06610	Symbols: | DNA-binding enhancer protein-related | chr3:2060843-2061851 FORWARD	6064.14	11072
Brapa_ESTC001737	AT1G52280	Symbols: AtRABG3d | AtRABG3d (Arabidopsis Rab GTPase homolog G3d); GTP binding | chr1:19471819-19473118 REVERSE	1912.04	2176.32
Brapa_ESTC001738	AT5G47890	Symbols: | NADH-ubiquinone oxidoreductase B8 subunit, putative | chr5:19406032-19407635 FORWARD	4616.45	5139.64
Brapa_ESTC001739	AT4G23910	Symbols: | similar to unknown protein [Arabidopsis thaliana] (TAIR:AT4G10970.3); similar to unknown protein [Oryza sativa (japonica cultivar-group)] (GB:BAD05314.1) | chr4:12427065-12429297 FORWARD	3369.86	2192.21
Brapa_ESTC001740	AT2G30410	Symbols: KIS | KIS (KIESEL); unfolded protein binding | chr2:12966889-12967629 FORWARD	24044.7	41159.8
Brapa_ESTC001741	AT5G39510	Symbols: VTI11, ATVTI1A, ATVTI11, ZIG, SGR4, VTI1A | VTI11 (VESICLE TRANSPORT V-SNARE 11, vesicle transport v-SNARE 11); receptor | chr5:15839263-15840819 FORWARD	22857.2	8869.05
Brapa_ESTC001742	AT1G47970	Symbols: | similar to unknown protein [Arabidopsis thaliana] (TAIR:AT3G17160.1); similar to conserved hypothetical protein [Bacillus weihenstephanensis KBAB4] (GB:ZP_01184818.1); similar to Os01g0332900 [Oryza sativa (japonica cultivar-group)] (GB:NP_001042934.1) | chr1:17691011-17692231 FORWARD	3957.89	5807
Brapa_ESTC001743	AT3G51260	Symbols: PAD1 | PAD1 (20S proteasome alpha subunit D1); peptidase | chr3:19042065-19043725 FORWARD	8240.32	8859.81
Brapa_ESTC001744	AT1G56360	Symbols: PAP6, ATPAP6 | ATPAP6/PAP6 (purple acid phosphatase 6); acid phosphatase/ protein serine/threonine phosphatase | chr1:21102268-21104507 REVERSE	5.8224	7.0486
Brapa_ESTC001745	AT5G14100	Symbols: ATNAP14 | ATNAP14 (Non-intrinsic ABC protein 14) | chr5:4549708-4551634 REVERSE	137.719	368.882
Brapa_ESTC001746	AT1G33430	Symbols: | galactosyltransferase family protein | chr1:12124418-12126032 REVERSE	83.5659	116.173
Brapa_ESTC001747	AT5G22580	Symbols: | Identical to Protein At5g22580 [Arabidopsis Thaliana] (GB:Q9FK81); similar to stable protein 1-related [Arabidopsis thaliana] (TAIR:AT3G17210.1); similar to hypothetical protein [Cucumis melo] (GB:BAD93607.1); contains InterPro domain Stress responsive alpha-beta barrel; (InterPro:IPR013097); contains InterPro domain Dimeric alpha-beta barrel; (InterPro:IPR011008) | chr5:7502712-750314…	3973.35	2287.77
Brapa_ESTC001748	AT5G22950	| Symbols: | SNF7 family protein | chr5:7681383-7682723 FORWARD	1092.13	1916.42
Brapa_ESTC001749	AT3G09200	Symbols: | 60S acidic ribosomal protein P0 (RPP0B) | chr3:2823370-2825026 REVERSE	16265.7	10823.3
Brapa_ESTC001750	AT4G39210	Symbols: APL3 | APL3 (large subunit of AGP 3) | chr4:18260326-18263175 FORWARD	342.989	2049.2
Brapa_ESTC001751	AT4G15545	Symbols: | similar to unknown protein [Arabidopsis thaliana] (TAIR:AT1G16520.1); similar to unknown protein [Oryza sativa (japonica cultivar-group)] (GB:AAT85086.1); contains InterPro domain DNA topoisomerases I, dispensable insert, eukaryotic-type; (InterPro:IPR009054) | chr4:8875930-8877565 FORWARD	2817.21	1468.14
Brapa_ESTC001752	AT2G24090	Symbols: | ribosomal protein L35 family protein | chr2:10249118-10250496 FORWARD	1686.06	3671.29
Brapa_ESTC001753	AT5G57120	Symbols: | similar to unknown protein [Arabidopsis thaliana] (TAIR:AT5G60030.1); similar to BRI1-KD interacting protein 132 [Oryza sativa (japonica cultivar-group)] (GB:BAD11359.1); similar to Os12g0613500 [Oryza sativa (japonica cultivar-group)] (GB:NP_001067264.1); contains InterPro domain SRP40, C-terminal; (InterPro:IPR007718); contains InterPro domain Lissencephaly type-1-like homology motif…	1526.09	4404.96
Brapa_ESTC001754	AT1G23600	Symbols: | similar to unknown protein [Arabidopsis thaliana] (TAIR:AT1G23570.2); similar to OBP32pep (GB:AAA79703.1); contains InterPro domain Protein of unknown function DUF220; (InterPro:IPR003863) | chr1:8361187-8362347 REVERSE	60.783	92.5445
Brapa_ESTC001755	AT5G59613	Symbols: | similar to unknown protein [Arabidopsis thaliana] (TAIR:AT3G46430.1); similar to mitochondrial ATP synthase 6 KD subunit [Oryza sativa (japonica cultivar-group)] (GB:BAB21526.1) | chr5:24033388-24033726 REVERSE	8929.69	12280.1
Brapa_ESTC001756	AT1G07660	| Symbols: | histone H4 | chr1:2369209-2369520 FORWARD	308.806	4792.32
Brapa_ESTC001757	AT2G20490	Symbols: NOP10, EDA27 | EDA27/NOP10 (embryo sac development arrest 27); RNA binding | chr2:8838978-8839804 FORWARD	4318.9	8236.86
Brapa_ESTC001758	AT5G24520	Symbols: TTG, TTG1 | TTG1 (TRANSPARENT TESTA GLABRA 1); nucleotide binding | chr5:8371711-8372736 REVERSE	3310.1	1326.24
Brapa_ESTC001759	AT3G02770	Symbols: | dimethylmenaquinone methyltransferase family protein | chr3:601024-601891 REVERSE	4060.74	6618.47
Brapa_ESTC001760	AT4G05320	Symbols: UBQ10 | UBQ10 (POLYUBIQUITIN 10); protein binding | chr4:2718557-2719951 FORWARD	22767.2	17046.1
Brapa_ESTC001761	no_hits_f	---------	6484.25	5270.42
Brapa_ESTC001762	AT5G20900	Symbols: | similar to unknown protein [Arabidopsis thaliana] (TAIR:AT3G43440.1); similar to ZIM motif family protein, expressed [Oryza sativa (japonica cultivar-group)] (GB:ABF96481.1); similar to OSJNBa0060D06.16 [Oryza sativa (japonica cultivar-group)] (GB:CAE03550.1); similar to Os04g0653000 [Oryza sativa (japonica cultivar-group)] (GB:NP_001054103.1); contains InterPro domain ZIM; (InterPro:I…	5243.09	6854.71
Brapa_ESTC001763	AT4G13720	Symbols: | inosine triphosphate pyrophosphatase, putative / HAM1 family protein | chr4:7967162-7968890 REVERSE	3236.51	5225.25
Brapa_ESTC001764	AT5G15910	| Symbols: | dehydrogenase-related | chr5:5193210-5195205 FORWARD	628.488	803.136
Brapa_ESTC001765	AT5G18380	Symbols: | 40S ribosomal protein S16 (RPS16C) | chr5:6090255-6090695 REVERSE	49018.4	48129.3
Brapa_ESTC001766	AT1G23520	Symbols: | similar to unknown protein [Arabidopsis thaliana] (TAIR:AT1G23600.1); similar to OBP32pep (GB:AAA79703.1); contains InterPro domain Protein of unknown function DUF220; (InterPro:IPR003863) | chr1:8343560-8344664 REVERSE	297.043	313.374
Brapa_ESTC001767	AT5G26880	Symbols: | tRNA/rRNA methyltransferase (SpoU) family protein | chr5:9457953-9459193 REVERSE	83.7084	130.408
Brapa_ESTC001768	AT1G18600	| Symbols: | rhomboid family protein | chr1:6400639-6402579 FORWARD	249.451	216.152
Brapa_ESTC001769	AT5G45280	Symbols: | pectinacetylesterase, putative | chr5:18364089-18366715 FORWARD	16899.6	5600.52
Brapa_ESTC001770	AT3G01390	Symbols: AVMA10, VMA10 | VMA10 (VACUOLAR MEMBRANE ATPASE 10) | chr3:150272-150929 REVERSE	22445.3	20746.1
Brapa_ESTC001771	AT3G46630	Symbols: | similar to defective chloroplasts and leaves protein-related / DCL protein-related [Arabidopsis thaliana] (TAIR:AT1G45230.1); similar to putative defective chloroplasts and leaves (DCL) protein [Oryza sativa (japonica cultivar-group)] (GB:AAQ56405.1) | chr3:17192123-17193331 REVERSE	456.445	576.601
Brapa_ESTC001772	AT4G00430	Symbols: PIP1E, TMP-C, PIP1;4 | TMP-C (plasma membrane intrinsic protein 1;4); water channel | chr4:186143-187531 REVERSE	27305.3	25146.1
Brapa_ESTC001773	AT5G27850	Symbols: | 60S ribosomal protein L18 (RPL18C) | chr5:9873173-9874301 FORWARD	18537.8	24027
Brapa_ESTC001774	no_hits_f	---------	5418.65	6396.63
Brapa_ESTC001775	AT3G07390	Symbols: AIR12 | AIR12 (Auxin-Induced in Root cultures 12); extracellular matrix structural constituent | chr3:2365458-2366279 FORWARD	831.065	415.457
Brapa_ESTC001776	AT1G78920	Symbols: AVPL1, AVP2 | AVP2 (ARABIDOPSIS VACUOLAR H+-PYROPHOSPHATASE 2) | chr1:29677233-29681654 FORWARD	2069.16	1779.51
Brapa_ESTC001777	AT3G58600	Symbols: | similar to ATNAP4 (ARABIDOPSIS THALIANA NON-INTRINSIC ABC PROTEIN 4) [Arabidopsis thaliana] (TAIR:AT1G03900.1); similar to unknown protein [Oryza sativa (japonica cultivar-group)] (GB:BAD61234.1); contains InterPro domain Adaptin ear-binding coat-associated protein 1 NECAP-1; (InterPro:IPR012466) | chr3:21679723-21681976 REVERSE	2756.79	1110.94
Brapa_ESTC001778	AT4G20780	Symbols: | calcium-binding protein, putative | chr4:11133320-11133895 REVERSE	2675.89	2544.66
Brapa_ESTC001779	AT1G03730	Symbols: | similar to unknown protein [Arabidopsis thaliana] (TAIR:AT4G03600.1); similar to expressed protein [Oryza sativa (japonica cultivar-group)] (GB:ABA97787.1) | chr1:931017-931520 REVERSE	229.748	259.009
Brapa_ESTC001780	AT1G30970	Symbols: SUF4 | SUF4 (SUPPRESSOR OF FRIGIDA4); transcription factor | chr1:11040594-11043574 REVERSE	824.286	214.674
Brapa_ESTC001781	AT4G17310	Symbols: | similar to unknown protein [Arabidopsis thaliana] (TAIR:AT5G47455.6); similar to hypothetical protein 26.t00030 [Brassica oleracea] (GB:ABD65009.1) | chr4:9686478-9686860 REVERSE	1392.02	770.364
Brapa_ESTC001782	AT2G42220	Symbols: | rhodanese-like domain-containing protein | chr2:17599183-17600383 FORWARD	1946.01	7693.82
Brapa_ESTC001783	AT3G07780	Symbols: | protein binding / zinc ion binding | chr3:2485110-2486882 FORWARD	2150.8	3682.15
Brapa_ESTC001784	AT4G31985	Symbols: | 60S ribosomal protein L39 (RPL39C) | chr4:15469937-15470372 FORWARD	15939.7	15905.1
Brapa_ESTC001785	AT4G20440	| Symbols: SMB | SMB | chr4:11022854-11023627 REVERSE	8408.27	9466.33
Brapa_ESTC001787	AT2G27020	Symbols: PAG1 | PAG1 (20S proteasome alpha subunit G1); peptidase | chr2:11535593-11537936 REVERSE	6971.62	9756.67
Brapa_ESTC001788	no_hits_f	---------	27667.4	30779.9
Brapa_ESTC001789	AT3G18050	Symbols: | similar to unknown protein [Arabidopsis thaliana] (TAIR:AT4G28100.1); similar to hypothetical protein MtrDRAFT_AC139526g8v1 [Medicago truncatula] (GB:ABE80139.1) | chr3:6180937-6182599 FORWARD	968.349	1170.19
Brapa_ESTC001790	AT3G55440	Symbols: TPI, ATCTIMC | ATCTIMC (CYTOSOLIC TRIOSE PHOSPHATE ISOMERASE); triose-phosphate isomerase | chr3:20564771-20567055 FORWARD	11173.5	9475.33
Brapa_ESTC001791	AT3G61790	Symbols: | seven in absentia (SINA) family protein | chr3:22882949-22884518 REVERSE	669.587	680.364
Brapa_ESTC001792	AT5G57370	Symbols: | similar to U2 snRNP auxiliary factor large subunit, putative [Arabidopsis thaliana] (TAIR:AT1G60900.1); similar to conserved hypothetical protein [Medicago truncatula] (GB:ABE84015.1) | chr5:23262037-23262696 FORWARD	5804.17	2226.34
Brapa_ESTC001793	AT5G02040	Symbols: | prenylated rab acceptor (PRA1) family protein | chr5:401160-402468 FORWARD	3846.66	1560.29
Brapa_ESTC001794	AT5G48220	Symbols: | indole-3-glycerol phosphate synthase, putative | chr5:19567156-19569272 FORWARD	3508.35	1556.16
Brapa_ESTC001795	AT1G70830	Symbols: MLP28 | MLP28 (MLP-LIKE PROTEIN 28) | chr1:26713865-26715057 REVERSE	8834.93	6105.68
Brapa_ESTC001796	AT4G31350	Symbols: | similar to unknown protein [Arabidopsis thaliana] (TAIR:AT2G19160.1); similar to Protein of unknown function DUF266, plant [Medicago truncatula] (GB:ABD28621.1); contains InterPro domain Protein of unknown function DUF266, plant; (InterPro:IPR004949) | chr4:15209956-15216895 FORWARD	1162.73	642.035
Brapa_ESTC001797	AT2G43460	Symbols: | 60S ribosomal protein L38 (RPL38A) | chr2:18053362-18054369 REVERSE	32846.1	34514.7
Brapa_ESTC001798	AT1G53210	Symbols: | sodium/calcium exchanger family protein / calcium-binding EF hand family protein | chr1:19848458-19851201 FORWARD	24773.9	12577.3
Brapa_ESTC001799	AT3G49870	Symbols: ATARLA1C | ATARLA1C (ADP-ribosylation factor-like A1C); GTP binding | chr3:18503659-18505006 REVERSE	22126	24814.9
Brapa_ESTC001800	AT5G53490	Symbols: | thylakoid lumenal 17.4 kDa protein, chloroplast | chr5:21740714-21741847 REVERSE	806.584	2227.81
Brapa_ESTC001801	AT3G60250	Symbols: CKB3 | CKB3 (casein kinase II beta chain 3); protein kinase CK2 regulator | chr3:22281689-22282937 REVERSE	11436.7	16353.6
Brapa_ESTC001802	AT4G27520	Symbols: | plastocyanin-like domain-containing protein | chr4:13750674-13751825 REVERSE	25578.8	5964.66
Brapa_ESTC001803	AT5G09330	Symbols: ANAC082 | ANAC082 (Arabidopsis NAC domain containing protein 82) | chr5:2892624-2894709 REVERSE	444.101	497.192
Brapa_ESTC001804	AT5G28850	Symbols: | calcium-binding EF hand family protein | chr5:10877364-10881282 REVERSE	1939.42	970.236
Brapa_ESTC001805	AT1G72740	Symbols: | DNA-binding family protein / histone H1/H5 family protein | chr1:27384161-27386349 REVERSE	749.094	169.319
Brapa_ESTC001806	AT4G29260	Symbols: | acid phosphatase class B family protein | chr4:14422316-14423415 REVERSE	691.055	695.174
Brapa_ESTC001807	AT5G18100	Symbols: CSD3 | CSD3 (COPPER/ZINC SUPEROXIDE DISMUTASE 3); copper, zinc superoxide dismutase | chr5:5987223-5988708 FORWARD	1569.83	6117.11
Brapa_ESTC001808	AT5G65430	Symbols: GF14 KAPPA, GRF8 | GRF8 (GENERAL REGULATORY FACTOR 8); protein phosphorylated amino acid binding | chr5:26165772-26167481 REVERSE	16864	22002.8
Brapa_ESTC001809	AT4G02720	Symbols: | similar to DEAD box RNA helicase, putative [Arabidopsis thaliana] (TAIR:AT1G20920.1); similar to Os09g0455400 [Oryza sativa (japonica cultivar-group)] (GB:NP_001063358.1); similar to hypothetical protein PY05066 [Plasmodium yoelii yoelii str. 17XNL] (GB:XP_725465.1); contains InterPro domain Protein of unknown function DUF926; (InterPro:IPR009269) | chr4:1204545-1205813 REVERSE	10417.8	11440.5
Brapa_ESTC001811	AT3G10985	Symbols: | wound-responsive protein-related | chr3:3442782-3443114 FORWARD	23781.2	15947.8
Brapa_ESTC001812	AT5G07960	Symbols: | Identical to UPF0139 protein At5g07960 [Arabidopsis Thaliana] (GB:Q9SD88); similar to unknown protein [Sorghum bicolor] (GB:AAM47587.1); similar to Os03g0756800 [Oryza sativa (japonica cultivar-group)] (GB:NP_001051319.1); contains InterPro domain Protein of unknown function UPF0139; (InterPro:IPR005351) | chr5:2542351-2543254 FORWARD	80.9997	88.9902
Brapa_ESTC001813	no_hits_f	---------	322.707	659.823
Brapa_ESTC001814	AT3G14890	| Symbols: | phosphoesterase | chr3:5008899-5013067 FORWARD	385.506	622.248
Brapa_ESTC001815	AT2G17705	Symbols: | protein-methionine-S-oxide reductase | chr2:7699588-7699971 FORWARD	843.329	122.845
Brapa_ESTC001816	AT5G03170	Symbols: FLA11 | FLA11 (fasciclin-like arabinogalactan-protein 11) | chr5:752897-753637 REVERSE	687.963	690.464
Brapa_ESTC001817	no_hits_f	---------	582.595	16828.2
Brapa_ESTC001818	AT5G03460	Symbols: | similar to Os02g0823600 [Oryza sativa (japonica cultivar-group)] (GB:NP_001048570.1); similar to F12E4.230-like protein [Hyacinthus orientalis] (GB:AAS20978.1) | chr5:864390-865508 FORWARD	307.194	483.384
Brapa_ESTC001819	no_hits_f	---------	312.79	883.781
Brapa_ESTC001820	AT4G30993	Symbols: | similar to unknown protein [Oryza sativa (japonica cultivar-group)] (GB:BAD72545.1); contains domain Metallo-dependent phosphatases (SSF56300); contains domain no description (G3D.3.60.21.10) | chr4:15098207-15099941 FORWARD	225.859	671.337
Brapa_ESTC001821	AT4G12290	Symbols: | copper amine oxidase, putative | chr4:7304954-7306968 FORWARD	335.991	760.48
Brapa_ESTC001822	AT3G18130	Symbols: | guanine nucleotide-binding family protein / activated protein kinase C receptor (RACK1) | chr3:6211115-6212377 REVERSE	20854.6	13307.5
Brapa_ESTC001823	AT2G41840	Symbols: | 40S ribosomal protein S2 (RPS2C) | chr2:17467094-17468476 REVERSE	8775.68	6022.85
Brapa_ESTC001824	AT1G72370	Symbols: AP40, RP40, RPSAA, P40 | P40 (40S ribosomal protein SA); structural constituent of ribosome | chr1:27246810-27248504 REVERSE	4557.28	3849.42
Brapa_ESTC001825	AT1G06250	Symbols: | lipase class 3 family protein | chr1:1913338-1914849 REVERSE	190.484	388.802
Brapa_ESTC001826	AT1G66200	Symbols: ATGSR2 | ATGSR2 (Arabidopsis thaliana glutamine synthase clone R2); glutamate-ammonia ligase | chr1:24659215-24661183 REVERSE	126.525	188.112
Brapa_ESTC001827	AT5G57020	Symbols: ATNMT1, NMT1 | NMT1 (N-MYRISTOYLTRANSFERASE 1) | chr5:23092677-23093981 FORWARD	1810.08	611.436
Brapa_ESTC001828	no_hits_f	---------	59.9092	262.087
Brapa_ESTC001829	AT5G15970	Symbols: COR6.6, KIN2 | KIN2 (COLD-RESPONSIVE 6.6) | chr5:5211969-5212444 FORWARD	22640.2	20601.2
Brapa_ESTC001830	AT3G51600	Symbols: LTP5 | LTP5 (LIPID TRANSFER PROTEIN 5); lipid transporter | chr3:19149640-19150103 REVERSE	14341.6	16780.2
Brapa_ESTC001831	no_hits_f	---------	1971.13	2093.05
Brapa_ESTC001832	AT1G48960	Symbols: | universal stress protein (USP) family protein | chr1:18116220-18117218 FORWARD	1735.39	2185.74
Brapa_ESTC001833	AT1G68590	Symbols: | plastid-specific 30S ribosomal protein 3, putative / PSRP-3, putative | chr1:25761256-25761832 REVERSE	3604.36	23194.1
Brapa_ESTC001834	AT5G53330	Symbols: | similar to Os06g0160400 [Oryza sativa (japonica cultivar-group)] (GB:NP_001056879.1); contains InterPro domain UBA-like; (InterPro:IPR009060); contains InterPro domain Ubiquitin-associated; (InterPro:IPR000449) | chr5:21656462-21657942 FORWARD	4862.32	1409.87
Brapa_ESTC001835	no_hits_f	---------	3485.72	18631.7
Brapa_ESTC001836	AT1G22790	Symbols: | similar to unknown protein [Arabidopsis thaliana] (TAIR:AT1G34010.1); similar to conserved hypothetical protein [Medicago truncatula] (GB:ABE81200.1) | chr1:8070260-8071281 FORWARD	2386.71	1131.44
Brapa_ESTC001837	AT5G23060	Symbols: | similar to unknown protein [Arabidopsis thaliana] (TAIR:AT3G59780.1); similar to Rhodanese-like [Medicago truncatula] (GB:ABE85110.1); contains InterPro domain Rhodanese-like; (InterPro:IPR001763) | chr5:7736763-7738415 REVERSE	548.616	4198.78
Brapa_ESTC001838	AT2G44530	Symbols: | ribose-phosphate pyrophosphokinase, putative / phosphoribosyl diphosphate synthetase, putative | chr2:18390808-18393050 FORWARD	12717.7	9981.92
Brapa_ESTC001839	AT2G41420	Symbols: | proline-rich family protein | chr2:17273872-17274951 REVERSE	2583.62	1976.4
Brapa_ESTC001840	AT1G27340	| Symbols: | F-box family protein | chr1:9495728-9497844 FORWARD	582.84	304.592
Brapa_ESTC001841	AT1G11910	Symbols: | aspartyl protease family protein | chr1:4017117-4019872 REVERSE	16491	16585.6
Brapa_ESTC001842	AT3G08610	Symbols: | similar to hypothetical protein MtrDRAFT_AC136139g5v1 [Medicago truncatula] (GB:ABE93033.1) | chr3:2616441-2616774 REVERSE	1892.86	3247.71
Brapa_ESTC001843	AT1G78630	Symbols: EMB1473 | EMB1473 (EMBRYO DEFECTIVE 1473); structural constituent of ribosome | chr1:29580890-29582299 FORWARD	5478.77	20851
Brapa_ESTC001844	AT2G38540	Symbols: LTP1, ATLTP1, LP1 | LP1 (nonspecific lipid transfer protein 1) | chr2:16137496-16137971 FORWARD	265.914	246.518
Brapa_ESTC001846	AT5G07230	Symbols: | protease inhibitor/seed storage/lipid transfer protein (LTP) family protein | chr5:2271014-2271409 FORWARD	465.621	562.841
Brapa_ESTC001847	AT1G60430	Symbols: ARPC3 | ARPC3 (actin-related protein C3) | chr1:22268462-22269347 REVERSE	8204.18	10164.5
Brapa_ESTC001848	AT4G35780	Symbols: | protein kinase family protein | chr4:16946734-16950410 REVERSE	1764.72	3346.92
Brapa_ESTC001849	AT1G63690	Symbols: | protease-associated (PA) domain-containing protein | chr1:23622153-23625745 FORWARD	5607.8	1816.2
Brapa_ESTC001850	AT2G03740	Symbols: | late embryogenesis abundant domain-containing protein / LEA domain-containing protein | chr2:1142938-1143914 REVERSE	5.9196	6.1881
Brapa_ESTC001852	AT3G58100	Symbols: | glycosyl hydrolase family protein 17 | chr3:21526374-21527306 REVERSE	1707.07	752.977
Brapa_ESTC001853	AT3G61200	Symbols: | thioesterase family protein | chr3:22668574-22669325 REVERSE	165.769	110.828
Brapa_ESTC001854	AT1G13960	Symbols: WRKY4 | WRKY4 (WRKY DNA-binding protein 4); transcription factor | chr1:4776619-4779040 FORWARD	11.1083	17.0269
Brapa_ESTC001855	AT5G14380	Symbols: AGP6 | AGP6 (ARABINOGALACTAN PROTEINS 6) | chr5:4636091-4636543 REVERSE	5.928	7.1967
Brapa_ESTC001856	AT2G32080	Symbols: PUR ALPHA-1 | PUR ALPHA-1 (purin-rich alpha 1); nucleic acid binding | chr2:13649793-13651113 REVERSE	7705.95	13893.4
Brapa_ESTC001857	AT3G27100	Symbols: | similar to unknown protein [Oryza sativa (japonica cultivar-group)] (GB:BAD88360.1); similar to Os01g0920200 [Oryza sativa (japonica cultivar-group)] (GB:NP_001045218.1); contains InterPro domain RuvA-like, C-terminal; (InterPro:IPR011132) | chr3:9995980-9997160 REVERSE	12871.4	16665.3
Brapa_ESTC001858	AT4G32830	Symbols: ATAUR1 | ATAUR1 (ATAURORA1); histone serine kinase(H3-S10 specific) / kinase/ protein serine/threonine kinase | chr4:15842561-15844358 FORWARD	137.859	161.215
Brapa_ESTC001859	AT4G26260	Symbols: MIOX4 | MIOX4 (MYO-INOSITOL OXYGENASE 4) | chr4:13297948-13300155 FORWARD	7.0184	8.894
Brapa_ESTC001860	AT2G19750	Symbols: | 40S ribosomal protein S30 (RPS30A) | chr2:8522119-8522888 FORWARD	17913.2	17323.9
Brapa_ESTC001861	AT1G01225	Symbols: | NC domain-containing protein-related | chr1:96064-97242 FORWARD	1486.23	3273.3
Brapa_ESTC001862	AT4G33865	Symbols: | 40S ribosomal protein S29 (RPS29C) | chr4:16233400-16234119 REVERSE	5133.78	9270.81
Brapa_ESTC001863	AT3G24800	Symbols: PRT1 | PRT1 (PROTEOLYSIS 1); ubiquitin-protein ligase | chr3:9055660-9057802 FORWARD	1632.27	1062.49
Brapa_ESTC001864	AT4G14000	Symbols: | similar to unknown protein [Arabidopsis thaliana] (TAIR:AT2G43320.2); similar to Os09g0359900 [Oryza sativa (japonica cultivar-group)] (GB:NP_001062976.1); similar to H0425E08.4 [Oryza sativa (indica cultivar-group)] (GB:CAH67536.1); contains domain no description (G3D.3.40.50.150); contains domain S-adenosyl-L-methionine-dependent methyltransferases (SSF53335); contains domain UNCHARA…	212.658	231.843
Brapa_ESTC001865	AT2G33380	Symbols: RD20 | RD20 (RESPONSIVE TO DESSICATION 20); calcium ion binding | chr2:14152060-14153450 REVERSE	6695.31	8064.51
Brapa_ESTC001866	AT2G39460	Symbols: RPL23A, ATRPL23A | ATRPL23A (RIBOSOMAL PROTEIN L23A); RNA binding / structural constituent of ribosome | chr2:16482127-16482982 FORWARD	4104.64	9091.19
Brapa_ESTC001867	no_hits_f	---------	118.249	71.0262
Brapa_ESTC001868	AT5G51040	Symbols: | similar to Protein of unknown function DUF339 [Medicago truncatula] (GB:ABE80212.1); contains InterPro domain Protein of unknown function DUF339; (InterPro:IPR005631) | chr5:20767926-20769016 FORWARD	57.0396	41.4874
Brapa_ESTC001869	AT2G45070	Symbols: SEC61 BETA | SEC61 BETA (suppressors of secretion-defective 61 Beta) | chr2:18594283-18594531 REVERSE	38450.1	48925.1
Brapa_ESTC001870	AT5G11560	| Symbols: | catalytic | chr5:3709735-3713995 REVERSE	3002.31	1518.72
Brapa_ESTC001871	AT2G40765	Symbols: | similar to Ubiquinol-cytochrome c reductase complex 6.7 kDa protein (CR6) (GB:P48505) | chr2:17019379-17020159 FORWARD	228.064	465.808
Brapa_ESTC001872	AT5G65720	Symbols: ATNIFS1, NIFS1 | ATNIFS1/NIFS1 (ARABIOPSIS THALIANA NITROGEN FIXATION S HOMOLOG 1) | chr5:26313959-26314936 FORWARD	1302.79	1526.13
Brapa_ESTC001873	AT4G26850	Symbols: VTC2 | VTC2 (VITAMIN C DEFECTIVE 2) | chr4:13499268-13501151 REVERSE	783.218	609.347
Brapa_ESTC001874	AT3G12210	Symbols: | similar to unnamed protein product [Tetraodon nigroviridis] (GB:CAG04365.1); similar to Os03g0728600 [Oryza sativa (japonica cultivar-group)] (GB:NP_001051148.1); contains domain no description (G3D.1.10.340.10); contains domain SUBFAMILY NOT NAMED (PTHR21521:SF2); contains domain FAMILY NOT NAMED (PTHR21521) | chr3:3894850-3895886 FORWARD	3329.93	3828.7
Brapa_ESTC001875	AT2G36880	Symbols: MAT3 | MAT3 (METHIONINE ADENOSYLTRANSFERASE 3); methionine adenosyltransferase | chr2:15486800-15487972 REVERSE	73.882	131.333
Brapa_ESTC001876	AT5G59690	| Symbols: | histone H4 | chr5:24068875-24069186 FORWARD	4105.62	4117.3
Brapa_ESTC001877	AT4G01560	Symbols: MEE49 | MEE49 (maternal effect embryo arrest 49) | chr4:677266-679164 REVERSE	8632.84	6804.76
Brapa_ESTC001878	AT5G03850	Symbols: | 40S ribosomal protein S28 (RPS28B) | chr5:1028541-1028735 REVERSE	8059.6	8242.34
Brapa_ESTC001879	AT3G11730	Symbols: AtRABD1, ATFP8 | ATFP8 (Arabidopsis Rab GTPase homolog D1); GTP binding | chr3:3709496-3711403 REVERSE	15244.8	17691.7
Brapa_ESTC001880	AT5G48500	Symbols: | similar to unknown protein [Arabidopsis thaliana] (TAIR:AT2G10930.1); similar to conserved hypothetical protein [Medicago truncatula] (GB:ABE79320.1) | chr5:19670461-19671243 FORWARD	219.439	285.824
Brapa_ESTC001881	AT4G06599	Symbols: | ubiquitin family protein | chr4:3666076-3667492 REVERSE	1018.63	1329.38
Brapa_ESTC001882	AT5G03460	Symbols: | similar to Os02g0823600 [Oryza sativa (japonica cultivar-group)] (GB:NP_001048570.1); similar to F12E4.230-like protein [Hyacinthus orientalis] (GB:AAS20978.1) | chr5:864390-865508 FORWARD	27755.5	40885.7
Brapa_ESTC001883	AT1G17200	Symbols: | integral membrane family protein | chr1:5878486-5879864 FORWARD	6633.63	10330.7
Brapa_ESTC001884	AT5G38220	Symbols: | similar to unknown protein [Arabidopsis thaliana] (TAIR:AT1G66900.1); similar to Os01g0689800 [Oryza sativa (japonica cultivar-group)] (GB:NP_001043924.1); similar to C (GB:BAD82560.1); contains InterPro domain Esterase/lipase/thioesterase; (InterPro:IPR000379); contains InterPro domain Phospholipase/Carboxylesterase; (InterPro:IPR003140) | chr5:15286242-15288370 FORWARD	1940.51	1665.53
Brapa_ESTC001885	AT3G47650	Symbols: | bundle-sheath defective protein 2 family / bsd2 family | chr3:17580561-17581247 FORWARD	9491.12	27565.7
Brapa_ESTC001886	AT5G61230	Symbols: | ankyrin repeat family protein | chr5:24645480-24646004 FORWARD	716.317	826.054
Brapa_ESTC001887	AT2G30570	Symbols: PSBW | photosystem II reaction center W (PsbW) protein-related | chr2:13026403-13027130 REVERSE	20193.6	20096.1
Brapa_ESTC001888	no_hits_f	---------	614.526	550.786
Brapa_ESTC001889	AT1G21900	Symbols: | emp24/gp25L/p24 family protein | chr1:7691154-7692316 REVERSE	12128.8	11343.8
Brapa_ESTC001890	AT1G21480	| Symbols: | exostosin family protein | chr1:7519105-7521415 REVERSE	357.819	299.116
Brapa_ESTC001891	AT5G46850	Symbols: | similar to hypothetical protein MtrDRAFT_AC150505g14v1 [Medicago truncatula] (GB:ABE89245.1); contains InterPro domain PIG-X/PBN1; (InterPro:IPR013233) | chr5:19027941-19029237 FORWARD	783.407	1230.63
Brapa_ESTC001892	AT5G22950	| Symbols: | SNF7 family protein | chr5:7681383-7682723 FORWARD	652.287	1316.19
Brapa_ESTC001893	AT1G19670	Symbols: CORI1, ATHCOR1 | ATCLH1 (CORONATINE-INDUCED PROTEIN 1) | chr1:6803787-6804914 REVERSE	190.359	163.658
Brapa_ESTC001894	AT2G28230	Symbols: | similar to unknown protein [Arabidopsis thaliana] (TAIR:AT4G09070.1); similar to Os09g0443500 [Oryza sativa (japonica cultivar-group)] (GB:NP_001063296.1); similar to hypothetical protein DDBDRAFT_0189078 [Dictyostelium discoideum AX4] (GB:XP_635527.1); contains domain FAMILY NOT NAMED (PTHR12465) | chr2:12044932-12046086 REVERSE	786.562	451.679
Brapa_ESTC001895	AT3G10080	Symbols: | germin-like protein, putative | chr3:3107481-3108164 REVERSE	177.371	75.5078
Brapa_ESTC001897	AT3G61260	Symbols: | DNA-binding family protein / remorin family protein | chr3:22686378-22687676 REVERSE	2317.75	970.659
Brapa_ESTC001898	AT5G53620	Symbols: | similar to intracellular protein transport protein USO1-related [Arabidopsis thaliana] (TAIR:AT2G46180.1); similar to hypothetical protein [Trifolium pratense] (GB:BAE71275.1) | chr5:21798443-21802287 FORWARD	5702.22	4882.33
Brapa_ESTC001899	AT1G45050	Symbols: UBC15, ATUBC2-1 | ATUBC2-1 (Arabidopsis thaliana ubiquitin-conjugating enzyme); ubiquitin-protein ligase | chr1:17033777-17035407 FORWARD	4404.83	3726.92
Brapa_ESTC001900	AT2G47470	Symbols: ATPDIL2-1, UNE5, MEE30 | ATPDIL2-1/MEE30/UNE5 (PDI-LIKE 2-1, maternal effect embryo arrest 30, unfertilized embryo sac 5); thiol-disulfide exchange intermediate | chr2:19488573-19490753 FORWARD	5947.7	5562.05
Brapa_ESTC001901	AT4G31985	Symbols: | 60S ribosomal protein L39 (RPL39C) | chr4:15469937-15470372 FORWARD	18008.7	23997.3
Brapa_ESTC001902	AT3G52860	Symbols: | similar to conserved hypothetical protein [Medicago truncatula] (GB:ABE94614.1); similar to Os05g0154900 [Oryza sativa (japonica cultivar-group)] (GB:NP_001054686.1) | chr3:19602976-19603719 REVERSE	450.862	868.71
Brapa_ESTC001903	AT1G27950	Symbols: | lipid transfer protein-related | chr1:9740727-9741978 FORWARD	2108.62	1090.96
Brapa_ESTC001904	AT3G16080	Symbols: | 60S ribosomal protein L37 (RPL37C) | chr3:5454898-5455683 FORWARD	32224.6	15541.8
Brapa_ESTC001905	AT4G27610	Symbols: | similar to unknown protein [Arabidopsis thaliana] (TAIR:AT4G27620.2); similar to unknown protein [Oryza sativa (japonica cultivar-group)] (GB:BAD29314.1) | chr4:13785654-13787338 REVERSE	4815.18	4894.77
Brapa_ESTC001906	AT5G64920	Symbols: CIP8 | CIP8 (COP1-INTERACTING PROTEIN 8); protein binding / zinc ion binding | chr5:25961564-25962568 REVERSE	515.911	477.357
Brapa_ESTC001907	AT5G16830	Symbols: PEP12P, SYP21, ATSYP21, PEP12, ATPEP12 | SYP21 (syntaxin 21); t-SNARE | chr5:5533079-5535155 REVERSE	3995.99	4725.75
Brapa_ESTC001908	AT5G47570	Symbols: | similar to hypothetical protein 25.t00006 [Brassica oleracea] (GB:ABD64969.1); similar to hypothetical protein 26.t00015 [Brassica oleracea] (GB:ABD64995.1) | chr5:19310095-19311892 REVERSE	1415.69	4877.97
Brapa_ESTC001909	AT5G43970	Symbols: TOM9-2, ATTOM22-V, TOM22-V | TOM22-V (TRANSLOCASE OUTER MITOCHONDRIAL MEMBRANE 22-V) | chr5:17710115-17710414 FORWARD	2137.8	2206.92
Brapa_ESTC001910	AT1G43670	Symbols: | fructose-1,6-bisphosphatase, putative / D-fructose-1,6-bisphosphate 1-phosphohydrolase, putative / FBPase, putative | chr1:16470624-16472787 FORWARD	2728.29	7784.4
Brapa_ESTC001911	AT5G08160	Symbols: ATPK3 | ATPK3 (Arabidopsis thaliana serine/threonine protein kinase 3); kinase | chr5:2625904-2627943 REVERSE	213.961	88.8871
Brapa_ESTC001912	AT3G45890	Symbols: | similar to unknown protein [Arabidopsis thaliana] (TAIR:AT1G13770.1); similar to Protein of unknown function DUF647 [Medicago truncatula] (GB:ABE84675.1); similar to Protein of unknown function DUF647 [Medicago truncatula] (GB:ABE92087.1); contains InterPro domain Protein of unknown function DUF647; (InterPro:IPR006968) | chr3:16882682-16885085 FORWARD	294.095	274.835
Brapa_ESTC001913	no_hits_f	---------	9046.82	16474.1
Brapa_ESTC001914	AT5G66680	Symbols: DGL1 | DGL1 (defective glycosylation 1); dolichyl-diphosphooligosaccharide-protein glycotransferase | chr5:26635066-26637807 REVERSE	2560.93	1413.05
Brapa_ESTC001915	AT4G40060	Symbols: ATHB16 | ATHB16 (ARABIDOPSIS THALIANA HOMEOBOX PROTEIN 13); transcription factor | chr4:18571676-18572768 REVERSE	6333.79	4822.21
Brapa_ESTC001916	AT5G42530	Symbols: | similar to ECS1 [Arabidopsis thaliana] (TAIR:AT1G31580.1) | chr5:17022176-17022566 REVERSE	11248.3	17312.6
Brapa_ESTC001917	AT5G13430	Symbols: | ubiquinol-cytochrome C reductase iron-sulfur subunit, mitochondrial, putative / Rieske iron-sulfur protein, putative | chr5:4305417-4307402 REVERSE	3837.88	2276.18
Brapa_ESTC001918	AT1G76860	Symbols: | small nuclear ribonucleoprotein, putative / snRNP, putative / Sm protein, putative | chr1:28859488-28860531 REVERSE	2947.22	3663.67
Brapa_ESTC001919	AT3G15040	Symbols: | similar to unknown protein [Arabidopsis thaliana] (TAIR:AT4G21970.1); similar to Os04g0413900 [Oryza sativa (japonica cultivar-group)] (GB:NP_001052750.1); similar to Os01g0862600 [Oryza sativa (japonica cultivar-group)] (GB:NP_001044884.1); similar to hypothetical protein LOC_Os10g27350 [Oryza sativa (japonica cultivar-group)] (GB:AAP53748.1); contains InterPro domain Protein of unkno…	3537.31	1372.04
Brapa_ESTC001920	AT2G40100	Symbols: LHCB4.3 | LHCB4.3 (LIGHT HARVESTING COMPLEX PSII); chlorophyll binding | chr2:16752962-16754268 FORWARD	66.0485	1011.44
Brapa_ESTC001921	AT5G54770	Symbols: TZ, THI1 | THI1 (THIAZOLE REQUIRING) | chr5:22263860-22265117 FORWARD	5916.78	8355.33
Brapa_ESTC001922	AT2G47910	Symbols: CRR6 | CRR6 (CHLORORESPIRATORY REDUCTION 6) | chr2:19622033-19622629 FORWARD	812.693	1170.85
Brapa_ESTC001923	AT1G30910	Symbols: | molybdenum cofactor sulfurase family protein | chr1:11000893-11002782 FORWARD	2108.65	4592.81
Brapa_ESTC001924	AT1G32740	Symbols: | protein binding / zinc ion binding | chr1:11844863-11846062 FORWARD	578.422	521.88
Brapa_ESTC001926	AT3G08520	Symbols: | 60S ribosomal protein L41 (RPL41D) | chr3:2586038-2586212 FORWARD	21540.4	28164.2
Brapa_ESTC001928	AT4G00110	Symbols: GAE3 | GAE3 (UDP-D-GLUCURONATE 4-EPIMERASE 3); catalytic | chr4:38702-39994 REVERSE	1573.91	649.849
Brapa_ESTC001929	no_hits_f	---------	144.126	119.565
Brapa_ESTC001930	AT5G61770	Symbols: PPAN | brix domain-containing protein | chr5:24833114-24834721 FORWARD	2770.51	1776.76
Brapa_ESTC001931	AT3G62790	Symbols: | NADH-ubiquinone oxidoreductase-related | chr3:23234296-23235196 REVERSE	9592.09	10519.9
Brapa_ESTC001932	AT5G24790	Symbols: | similar to unknown protein [Arabidopsis thaliana] (TAIR:AT5G10580.1); similar to Os09g0494600 [Oryza sativa (japonica cultivar-group)] (GB:NP_001063551.1); similar to hypothetical protein [Oryza sativa (japonica cultivar-group)] (GB:BAC55679.1); similar to Os08g0521000 [Oryza sativa (japonica cultivar-group)] (GB:NP_001062272.1); contains InterPro domain Protein of unknown function DUF…	269.745	259.624
Brapa_ESTC001933	AT1G49600	Symbols: ATRBP47A | ATRBP47A (ARABIDOPSIS THALIANA RNA-BINDING PROTEIN 47A); RNA binding | chr1:18360904-18363818 REVERSE	972.817	177.354
Brapa_ESTC001934	AT1G27950	Symbols: | lipid transfer protein-related | chr1:9740727-9741978 FORWARD	10318	5301.32
Brapa_ESTC001935	AT4G16450	Symbols: | similar to Os08g0431500 [Oryza sativa (japonica cultivar-group)] (GB:NP_001061863.1); similar to unknown protein [Oryza sativa (japonica cultivar-group)] (GB:BAC99342.1) | chr4:9280154-9280563 FORWARD	3633.61	5502.87
Brapa_ESTC001936	AT3G23600	Symbols: | dienelactone hydrolase family protein | chr3:8473840-8475662 FORWARD	1373.13	1981.97
Brapa_ESTC001937	AT2G28380	Symbols: DRB2 | DRB2 (DSRNA-BINDING PROTEIN 2); double-stranded RNA binding | chr2:12141175-12142992 REVERSE	1329.05	491.704
Brapa_ESTC001938	no_hits_f	---------	930.819	877.491
Brapa_ESTC001939	AT5G24560	Symbols: ATPP2-B12 | ATPP2-B12 (Phloem protein 2-B12) | chr5:8402208-8403269 FORWARD	194.018	253.32
Brapa_ESTC001940	AT5G22250	Symbols: | CCR4-NOT transcription complex protein, putative | chr5:7365608-7366444 REVERSE	1855.12	2151.09
Brapa_ESTC001941	AT1G78900	Symbols: VHA-A | VHA-A; ATP binding / hydrogen ion transporting ATP synthase, rotational mechanism | chr1:29665356-29669468 FORWARD	4530.71	3946.53
Brapa_ESTC001942	AT4G05460	Symbols: | F-box family protein (FBL20) | chr4:2761103-2762397 REVERSE	1207.66	1395.7
Brapa_ESTC001943	AT1G49700	Symbols: | similar to unknown protein [Arabidopsis thaliana] (TAIR:AT4G07675.1) | chr1:18392460-18393976 REVERSE	9422.67	9210.58
Brapa_ESTC001944	AT5G02580	Symbols: | similar to unknown protein [Arabidopsis thaliana] (TAIR:AT3G55240.1); similar to Os03g0280400 [Oryza sativa (japonica cultivar-group)] (GB:NP_001049737.1); similar to Os05g0462000 [Oryza sativa (japonica cultivar-group)] (GB:NP_001055765.1); similar to Os01g0837600 [Oryza sativa (japonica cultivar-group)] (GB:NP_001044739.1); contains InterPro domain Conserved hypothetical protein 1589…	6901.38	13752.3
Brapa_ESTC001945	AT3G08520	Symbols: | 60S ribosomal protein L41 (RPL41D) | chr3:2586038-2586212 FORWARD	9919.03	13474.1
Brapa_ESTC001946	AT1G78915	| Symbols: | binding | chr1:29672622-29675974 REVERSE	2367.45	5464.01
Brapa_ESTC001947	no_hits_f	---------	10029.9	17182.7
Brapa_ESTC001948	AT5G43060	Symbols: | cysteine proteinase, putative / thiol protease, putative | chr5:17287012-17289345 REVERSE	8433.97	27180.5
Brapa_ESTC001949	AT3G27430	Symbols: PBB1 | PBB1 (20S proteasome beta subunit B 1); peptidase | chr3:10154147-10156289 FORWARD	17463.6	8301.23
Brapa_ESTC001950	AT4G37260	Symbols: MYB73, AtMYB73 | AtMYB73/MYB73 (myb domain protein 73); DNA binding / transcription factor | chr4:17540596-17541558 FORWARD	7323.27	2825.87
Brapa_ESTC001951	AT5G57560	Symbols: XTH22, TCH4 | TCH4 (TOUCH 4); hydrolase, acting on glycosyl bonds | chr5:23324522-23325461 REVERSE	31416	17355.3
Brapa_ESTC001952	AT4G22820	Symbols: | zinc finger (AN1-like) family protein | chr4:11987882-11988412 REVERSE	6053.51	3588.1
Brapa_ESTC001953	AT3G17000	Symbols: UBC32 | UBC32 (ubiquitin-conjugating enzyme 31); ubiquitin-protein ligase | chr3:5797302-5799473 FORWARD	2316.45	3778.81
Brapa_ESTC001954	AT5G02380	Symbols: MT2B | MT2B (METALLOTHIONEIN 2B) | chr5:506753-507162 REVERSE	14996.9	8269.8
Brapa_ESTC001955	AT2G47140	Symbols: | short-chain dehydrogenase/reductase (SDR) family protein | chr2:19358040-19359129 REVERSE	1304.32	1454.9
Brapa_ESTC001956	AT3G55880	Symbols: | similar to unknown protein [Arabidopsis thaliana] (TAIR:AT2G40095.1); similar to Os03g0123800 [Oryza sativa (japonica cultivar-group)] (GB:NP_001048807.1); similar to unknown protein [Oryza sativa (japonica cultivar-group)] (GB:AAL58121.1); similar to Os01g0647700 [Oryza sativa (japonica cultivar-group)] (GB:NP_001043711.1); contains domain ALPHA/BETA HYDROLASE RELATED (PTHR10992:SF2);…	2481.95	425.141
Brapa_ESTC001957	AT3G55800	Symbols: SBPASE | SBPASE (sedoheptulose-bisphosphatase); phosphoric ester hydrolase | chr3:20720619-20722400 FORWARD	346.392	6384.21
Brapa_ESTC001958	AT5G21920	| Symbols: | YGGT family protein | chr5:7241353-7242768 REVERSE	1855.65	3139.92
Brapa_ESTC001959	AT3G50260	Symbols: CEJ1, ATERF#011 | ATERF#011/CEJ1 (COOPERATIVELY REGULATED BY ETHYLENE AND JASMONATE 1); DNA binding / transcription factor | chr3:18645669-18646130 FORWARD	327.567	349.833
Brapa_ESTC001960	AT4G36040	Symbols: | DNAJ heat shock N-terminal domain-containing protein (J11) | chr4:17049711-17050196 REVERSE	24358.6	8142
Brapa_ESTC001961	AT5G04340	Symbols: C2H2 | C2H2; nucleic acid binding / transcription factor/ zinc ion binding | chr5:1216322-1217038 REVERSE	10502.7	1718.48
Brapa_ESTC001962	AT1G03090	Symbols: MCCA | MCCA (3-methylcrotonyl-CoA carboxylase 1) | chr1:739715-743819 FORWARD	2038.23	1108.64
Brapa_ESTC001963	AT3G24500	Symbols: MBF1C, ATMBF1C | ATMBF1C/MBF1C (MULTIPROTEIN BRIDGING FACTOR 1C); DNA binding / transcription coactivator/ transcription factor | chr3:8918762-8919208 FORWARD	42.0678	35.4878
Brapa_ESTC001964	AT3G55460	Symbols: SCL30 | SCL30 (SC35-like splicing factor 30); RNA binding | chr3:20572001-20574479 FORWARD	10842.7	12517
Brapa_ESTC001965	AT3G11400	Symbols: ATEIF3G1, EIF3G1 | EIF3G1 (eukaryotic translation initiation factor 3G1); RNA binding / translation initiation factor | chr3:3578542-3580372 FORWARD	3498.68	6085.72
Brapa_ESTC001966	AT1G02560	Symbols: NCLPP1, NCLPP5, CLPP5 | CLPP5 (NUCLEAR ENCODED CLP PROTEASE 1); endopeptidase Clp | chr1:538000-539805 FORWARD	1455.4	655.974
Brapa_ESTC001967	AT1G62380	Symbols: ATACO2, ACO2 | ACO2 (ACC OXIDASE 2) | chr1:23086005-23087733 FORWARD	9924.08	11455.9
Brapa_ESTC001968	AT5G59160	Symbols: PPO, TOPP2 | TOPP2 (Type one serine/threonine protein phosphatase 2); protein serine/threonine phosphatase | chr5:23896793-23898328 FORWARD	496.009	284.638
Brapa_ESTC001969	AT4G27450	Symbols: | similar to unknown protein [Arabidopsis thaliana] (TAIR:AT3G15450.1); similar to unknown [Glycine max] (GB:AAG00940.1); contains domain no description (G3D.3.60.20.10); contains domain N-terminal nucleophile aminohydrolases (Ntn hydrolases) (SSF56235) | chr4:13727671-13728689 REVERSE	5548.41	12284.3
Brapa_ESTC001970	AT1G79090	Symbols: | similar to unknown protein [Arabidopsis thaliana] (TAIR:AT3G22270.1); similar to Os02g0517300 [Oryza sativa (japonica cultivar-group)] (GB:NP_001046960.1); similar to Os01g0769000 [Oryza sativa (japonica cultivar-group)] (GB:NP_001044369.1); similar to unknown protein [Oryza sativa (japonica cultivar-group)] (GB:BAD52714.1); contains domain gb def: YUP8H12R.29 protein (PTHR21551:SF11);…	5981.4	2842.18
Brapa_ESTC001971	AT2G24570	Symbols: ATWRKY17, WRKY17 | WRKY17 (WRKY DNA-binding protein 17); transcription factor | chr2:10444755-10446301 REVERSE	5182.93	1795.66
Brapa_ESTC001972	AT1G71780	Symbols: | similar to Os01g0184700 [Oryza sativa (japonica cultivar-group)] (GB:NP_001042235.1); similar to Os01g0715800 [Oryza sativa (japonica cultivar-group)] (GB:NP_001044066.1) | chr1:26999068-27000300 REVERSE	2246.58	1485.34
Brapa_ESTC001973	AT3G01290	| Symbols: | band 7 family protein | chr3:88259-89363 REVERSE	17013.9	11831.4
Brapa_ESTC001974	AT5G63790	Symbols: ANAC102 | ANAC102 (Arabidopsis NAC domain containing protein 102); transcription factor | chr5:25544113-25545239 REVERSE	68.4992	803.822
Brapa_ESTC001975	AT1G67870	| Symbols: | glycine-rich protein | chr1:25453256-25454606 REVERSE	7669.02	1234.95
Brapa_ESTC001976	AT5G42020	Symbols: BIP | BIP (LUMINAL BINDING PROTEIN); ATP binding | chr5:16824925-16827708 REVERSE	5441.3	3932.8
Brapa_ESTC001977	AT4G08950	Symbols: | phosphate-responsive protein, putative (EXO) | chr4:5740375-5741319 FORWARD	1488.52	342.915
Brapa_ESTC001978	AT3G22120	Symbols: CWLP | CWLP (CELL WALL-PLASMA MEMBRANE LINKER PROTEIN); lipid binding | chr3:7795290-7796294 REVERSE	20122.3	15725.7
Brapa_ESTC001979	AT2G39770	Symbols: VTC1, SOZ1, EMB101, GMP1, CYT1 | CYT1 (CYTOKINESIS DEFECTIVE 1); nucleotidyltransferase | chr2:16596479-16597819 FORWARD	10542.4	8072.13
Brapa_ESTC001980	AT1G25682	Symbols: | cell cycle control protein-related | chr1:9002519-9004537 REVERSE	3036.07	3546.62
Brapa_ESTC001981	AT5G48385	Symbols: | similar to hydroxyproline-rich glycoprotein family protein [Arabidopsis thaliana] (TAIR:AT4G14900.1); similar to unknown [Solanum tuberosum] (GB:ABB86244.1); contains InterPro domain Frigida-like; (InterPro:IPR012474) | chr5:19626697-19628938 FORWARD	9460.62	8077.7
Brapa_ESTC001982	AT5G62640	Symbols: ELF5 | ELF5 (EARLY FLOWERING 5) | chr5:25166810-25169577 REVERSE	6781.56	1279.6
Brapa_ESTC001983	AT1G76180	Symbols: ERD14 | ERD14 (EARLY RESPONSE TO DEHYDRATION 14) | chr1:28591907-28592551 REVERSE	42741.1	51138.9
Brapa_ESTC001984	AT5G60800	Symbols: | heavy-metal-associated domain-containing protein | chr5:24478342-24479690 REVERSE	653.567	2441.88
Brapa_ESTC001985	AT3G18690	Symbols: MKS1 | MKS1 (MAP KINASE SUBSTRATE 1) | chr3:6429761-6430429 REVERSE	711.246	347.85
Brapa_ESTC001986	AT3G53970	Symbols: | proteasome inhibitor-related | chr3:19996186-19998110 FORWARD	5927.81	4432.2
Brapa_ESTC001987	AT3G12800	Symbols: | short-chain dehydrogenase/reductase (SDR) family protein | chr3:4063470-4064764 REVERSE	13296	21100.1
Brapa_ESTC001988	AT5G62860	Symbols: | F-box family protein-related | chr5:25249858-25251793 FORWARD	1783.24	516.854
Brapa_ESTC001989	AT2G42770	Symbols: | peroxisomal membrane 22 kDa family protein | chr2:17805712-17807004 REVERSE	163.88	426.857
Brapa_ESTC001990	AT3G60250	Symbols: CKB3 | CKB3 (casein kinase II beta chain 3); protein kinase CK2 regulator | chr3:22281689-22282937 REVERSE	7026.36	6659.4
Brapa_ESTC001991	AT2G37110	Symbols: | similar to unknown protein [Arabidopsis thaliana] (TAIR:AT2G40935.1); similar to Uncharacterized Cys-rich domain [Medicago truncatula] (GB:ABE78316.1); contains InterPro domain Protein of unknown function Cys-rich; (InterPro:IPR006461) | chr2:15599768-15600805 FORWARD	23423.2	17542.7
Brapa_ESTC001992	no_hits_f	---------	10330.1	8550.73
Brapa_ESTC001993	AT5G03740	Symbols: HDT3, HD2C | HD2C (HISTONE DEACETYLASE 2C); nucleic acid binding / zinc ion binding | chr5:981993-983960 FORWARD	1914.21	3564.19
Brapa_ESTC001994	AT2G31440	| Symbols: | protein binding | chr2:13406386-13408048 REVERSE	6640.06	12071.4
Brapa_ESTC001995	AT1G23820	Symbols: SPDS1 | SPDS1 (SPERMIDINE SYNTHASE 1) | chr1:8420267-8422713 FORWARD	3061.93	1672.75
Brapa_ESTC001996	AT5G53160	Symbols: | similar to unknown protein [Arabidopsis thaliana] (TAIR:AT1G01360.1); similar to CAPIP1 [Capsicum annuum] (GB:AAT35532.1); similar to CAPIP1-like [Solanum tuberosum] (GB:ABB29920.1); contains domain Bet v1-like (SSF55961); contains domain no description (G3D.3.30.530.20) | chr5:21578252-21579179 FORWARD	500.364	1364.72
Brapa_ESTC001997	AT5G54840	Symbols: | GTP-binding family protein | chr5:22293837-22295554 REVERSE	257.133	489.472
Brapa_ESTC001998	AT1G30630	Symbols: | coatomer protein epsilon subunit family protein / COPE family protein | chr1:10858528-10860155 REVERSE	7294.93	12808.6
Brapa_ESTC001999	AT2G45520	Symbols: | similar to Os06g0129800 [Oryza sativa (japonica cultivar-group)] (GB:NP_001056684.1); similar to hypothetical protein [Oryza sativa (japonica cultivar-group)] (GB:BAD68389.1) | chr2:18762283-18763342 REVERSE	3447.82	1952.14
Brapa_ESTC002000	AT5G21940	Symbols: | similar to unknown protein [Arabidopsis thaliana] (TAIR:AT3G43850.1); similar to MTD1 [Medicago truncatula] (GB:AAF86687.1); similar to MTD1 [Medicago truncatula] (GB:ABE80228.1) | chr5:7249449-7250356 REVERSE	40969.9	41530.1
Brapa_ESTC002001	no_hits_f	---------	3234.73	11257.4
Brapa_ESTC002002	AT5G10430	Symbols: ATAGP4, AGP4 | AGP4 (ARABINOGALACTAN-PROTEIN 4) | chr5:3277829-3278236 REVERSE	11013.2	1893.91
Brapa_ESTC002003	AT2G30020	Symbols: | protein phosphatase 2C, putative / PP2C, putative | chr2:12821514-12822981 FORWARD	11809.7	5725.84
Brapa_ESTC002004	AT2G35980	Symbols: NHL10, YLS9 | YLS9 (YELLOW-LEAF-SPECIFIC GENE 9) | chr2:15117714-15118397 FORWARD	476.855	120.064
Brapa_ESTC002005	AT1G03140	Symbols: | splicing factor Prp18 family protein | chr1:754471-756223 REVERSE	8536.89	4741.05
Brapa_ESTC002006	AT1G13390	Symbols: | similar to unknown protein [Arabidopsis thaliana] (TAIR:AT1G68490.1); similar to hypothetical protein [Cleome spinosa] (GB:ABD96883.1) | chr1:4592826-4593546 REVERSE	1162.49	1728.13
Brapa_ESTC002007	AT5G45750	Symbols: AtRABA1c | AtRABA1c (Arabidopsis Rab GTPase homolog A1c); GTP binding | chr5:18576545-18577866 FORWARD	1669.69	581.681
Brapa_ESTC002008	no_hits_f	---------	444.923	19448.4
Brapa_ESTC002010	AT5G47310	Symbols: | similar to unknown protein [Arabidopsis thaliana] (TAIR:AT4G17486.1); similar to hypothetical protein 25.t00041 [Brassica oleracea] (GB:ABD64953.1); contains InterPro domain Protein of unknown function DUF862, eukaryotic; (InterPro:IPR008580) | chr5:19218552-19219901 FORWARD	15016.8	7748.49
Brapa_ESTC002011	AT1G09480	Symbols: | cinnamyl-alcohol dehydrogenase family / CAD family | chr1:3057977-3060663 FORWARD	289.332	598.172
Brapa_ESTC002012	AT3G05530	Symbols: ATS6A.2, RPT5A | RPT5A (regulatory particle triple-A 5A); ATPase/ calmodulin binding | chr3:1603546-1605999 FORWARD	1591.92	978.526
Brapa_ESTC002013	AT1G67810	Symbols: | Fe-S metabolism associated domain-containing protein | chr1:25430151-25430927 FORWARD	5896.45	2205.73
Brapa_ESTC002014	AT4G22710	Symbols: CYP706A2 | CYP706A2 (cytochrome P450, family 706, subfamily A, polypeptide 2); oxygen binding | chr4:11935049-11936629 FORWARD	13916.3	5154.91
Brapa_ESTC002015	AT5G06290	Symbols: | 2-cys peroxiredoxin, chloroplast, putative | chr5:1919381-1921212 FORWARD	3395.61	2922.07
Brapa_ESTC002016	AT4G17040	Symbols: | ATP-dependent Clp protease proteolytic subunit, putative | chr4:9586759-9589316 REVERSE	1359.83	1432.07
Brapa_ESTC002017	AT4G39840	Symbols: | similar to hypothetical protein MtrDRAFT_AC125389g23v2 [Medicago truncatula] (GB:ABE94089.1) | chr4:18485262-18486617 FORWARD	7828.58	2908.07
Brapa_ESTC002018	AT1G20620	Symbols: SEN2, CAT3 | CAT3 (CATALASE 3); catalase | chr1:7143132-7146183 FORWARD	33944.6	25679.5
Brapa_ESTC002019	AT3G59970	Symbols: MTHFR1 | MTHFR1 (METHYLENETETRAHYDROFOLATE REDUCTASE 1); methylenetetrahydrofolate reductase (NADPH) | chr3:22162280-22165300 FORWARD	2229.82	2074.08
Brapa_ESTC002020	AT4G32030	Symbols: | similar to unknown protein [Arabidopsis thaliana] (TAIR:AT1G80610.1); similar to Os02g0182700 [Oryza sativa (japonica cultivar-group)] (GB:NP_001046100.1) | chr4:15490909-15493013 FORWARD	21171.3	18583.5
Brapa_ESTC002021	AT5G08790	Symbols: ANAC081, ATAF2 | ATAF2 (Arabidopsis NAC domain containing protein 81) | chr5:2859114-2860145 REVERSE	11408.4	10094
Brapa_ESTC002022	AT1G69890	Symbols: | similar to unknown protein [Arabidopsis thaliana] (TAIR:AT1G27100.1); similar to Cytosolic fatty-acid binding; Actin-crosslinking proteins [Medicago truncatula] (GB:ABE82702.1); contains InterPro domain Protein of unknown function DUF569; (InterPro:IPR007679); contains InterPro domain Actin-crosslinking proteins; (InterPro:IPR008999) | chr1:26327089-26328190 REVERSE	104.251	363.301
Brapa_ESTC002023	AT2G20920	Symbols: | similar to CDF1 (CELL GROWTH DEFECT FACTOR 1), heat shock protein binding [Arabidopsis thaliana] (TAIR:AT5G23040.2); similar to expressed protein [Oryza sativa (japonica cultivar-group)] (GB:ABF93866.1) | chr2:9005809-9006870 FORWARD	2376.38	1133.86
Brapa_ESTC002024	AT3G20390	Symbols: | endoribonuclease L-PSP family protein | chr3:7110233-7111701 REVERSE	4241.61	1422.77
Brapa_ESTC002025	AT3G23490	Symbols: CYN | CYN (CYANASE); cyanate hydratase | chr3:8423245-8424422 REVERSE	9885.63	12316.1
Brapa_ESTC002026	AT3G15450	Symbols: | similar to unknown protein [Arabidopsis thaliana] (TAIR:AT4G27450.1); similar to unknown [Glycine max] (GB:AAG00940.1); contains domain ASPARAGINE SYNTHETASE (PTHR11772); contains domain no description (G3D.3.60.20.10); contains domain N-terminal nucleophile aminohydrolases (Ntn hydrolases) (SSF56235) | chr3:5213057-5214005 FORWARD	53280.4	45963.8
Brapa_ESTC002027	AT1G52590	Symbols: | similar to RNase H domain-containing protein [Arabidopsis thaliana] (TAIR:AT1G24090.1); similar to Putative thiol-disulphide oxidoreductase DCC [Medicago truncatula] (GB:ABD28717.1); contains InterPro domain Putative thiol-disulphide oxidoreductase DCC; (InterPro:IPR007263) | chr1:19592893-19593900 REVERSE	590.047	1011.97
Brapa_ESTC002028	AT1G30070	Symbols: | SGS domain-containing protein | chr1:10546778-10548056 REVERSE	1971.31	1068.73
Brapa_ESTC002029	AT2G37480	Symbols: | similar to unknown protein [Arabidopsis thaliana] (TAIR:AT3G53670.1); similar to hypothetical protein MtrDRAFT_AC125368g26v1 [Medicago truncatula] (GB:ABE93949.1); similar to hypothetical protein MtrDRAFT_AC135797g8v1 [Medicago truncatula] (GB:ABE82095.1); contains InterPro domain Galactose-binding like; (InterPro:IPR008979) | chr2:15745723-15746657 FORWARD	950.935	558.231
Brapa_ESTC002030	no_hits_f	---------	2861.31	3569.16
Brapa_ESTC002031	AT1G70330	Symbols: ENT1,AT | ENT1,AT (EQUILIBRATIVE NUCLEOTIDE TRANSPORTER 1); nucleoside transporter | chr1:26506583-26508023 FORWARD	11175.5	6878.67
Brapa_ESTC002032	AT2G30860	Symbols: GLUTTR, ATGSTF7, ATGSTF9 | ATGSTF9 (Arabidopsis thaliana Glutathione S-transferase (class phi) 9); glutathione transferase | chr2:13146209-13147134 FORWARD	11555.2	8885.16
Brapa_ESTC002033	AT3G57650	Symbols: LPAT2 | LPAT2 (Lysophosphatidyl acyltransferase 2); 1-acylglycerol-3-phosphate O-acyltransferase | chr3:21360728-21363816 FORWARD	5711.81	2324.91
Brapa_ESTC002034	AT3G52300	Symbols: ATPQ | ATP synthase D chain-related | chr3:19407667-19409097 FORWARD	5083.01	9706.3
Brapa_ESTC002035	AT1G28370	Symbols: ERF11, ATERF11 | ATERF11/ERF11 (ERF domain protein 11); DNA binding / transcription factor/ transcriptional repressor | chr1:9956337-9956837 REVERSE	3574.46	4177.83
Brapa_ESTC002036	AT2G17870	Symbols: | cold-shock DNA-binding family protein | chr2:7771358-7772263 REVERSE	684.58	548.435
Brapa_ESTC002037	AT3G13570	Symbols: SCL30a | SCL30a (SC35-like splicing factor 30a); RNA binding | chr3:4429571-4431609 REVERSE	4034.67	2778.32
Brapa_ESTC002038	AT4G32940	Symbols: GAMMAVPE, GAMMA-VPE | GAMMA-VPE (Vacuolar processing enzyme gamma); cysteine-type endopeptidase | chr4:15900560-15903164 REVERSE	7285.01	3397.48
Brapa_ESTC002039	AT5G60340	Symbols: | maoC-like dehydratase domain-containing protein | chr5:24291105-24293117 REVERSE	1194.3	2150.78
Brapa_ESTC002040	AT1G15380	Symbols: | lactoylglutathione lyase | chr1:5290950-5292282 FORWARD	1492.53	607.598
Brapa_ESTC002041	AT1G73260	Symbols: | trypsin and protease inhibitor family protein / Kunitz family protein | chr1:27551071-27551718 REVERSE	103.785	121.007
Brapa_ESTC002042	AT1G65030	Symbols: | transducin family protein / WD-40 repeat family protein | chr1:24160461-24162174 FORWARD	5042.11	1720.47
Brapa_ESTC002043	AT1G64750	| Symbols: ATDSS1(I) | ATDSS1(I) | chr1:24056450-24057375 REVERSE	7158.42	5537.83
Brapa_ESTC002044	AT5G17380	Symbols: | pyruvate decarboxylase family protein | chr5:5724922-5726722 REVERSE	5287.42	3774.61
Brapa_ESTC002045	AT4G32480	Symbols: | similar to unknown protein [Arabidopsis thaliana] (TAIR:AT2G20670.1); similar to Protein of unknown function DUF506, plant [Medicago truncatula] (GB:ABD32359.1); contains InterPro domain Protein of unknown function DUF506, plant; (InterPro:IPR006502) | chr4:15676494-15677782 FORWARD	7832.16	727.723
Brapa_ESTC002046	AT3G29200	Symbols: ATCM1, CM1 | CM1 (chorismate mutase 1); chorismate mutase | chr3:11165819-11167495 REVERSE	811.435	1152.27
Brapa_ESTC002047	AT2G31390	Symbols: | pfkB-type carbohydrate kinase family protein | chr2:13390712-13393193 REVERSE	11883.8	1908.89
Brapa_ESTC002048	AT3G46780	Symbols: PTAC16 | PTAC16 (PLASTID TRANSCRIPTIONALLY ACTIVE18) | chr3:17239751-17242006 FORWARD	234.124	633.658
Brapa_ESTC002049	AT5G48657	Symbols: | defense protein-related | chr5:19751346-19752742 REVERSE	1824.51	1499.21
Brapa_ESTC002050	AT1G17170	Symbols: ATGSTU24 | ATGSTU24 (Arabidopsis thaliana Glutathione S-transferase (class tau) 24); glutathione transferase | chr1:5869888-5870684 FORWARD	12948.6	1676.42
Brapa_ESTC002051	AT3G22370	Symbols: ATAOX1A, AOX1A | AOX1A (alternative oxidase 1A); alternative oxidase | chr3:7906897-7908423 FORWARD	23.9292	8.5443
Brapa_ESTC002052	AT4G11280	Symbols: | ACS6 (1-AMINOCYCLOPROPANE-1-CARBOXYLIC ACID (ACC) SYNTHASE 6) | chr4:6864164-6865918 FORWARD	1143.33	2203.73
Brapa_ESTC002053	AT4G37800	Symbols: | xyloglucan:xyloglucosyl transferase, putative / xyloglucan endotransglycosylase, putative / endo-xyloglucan transferase, putative | chr4:17775697-17777366 REVERSE	8341.47	23066.1
Brapa_ESTC002054	AT5G13490	Symbols: AAC2 | AAC2 (ADP/ATP CARRIER 2); binding | chr5:4336037-4337382 FORWARD	3584.58	825.241
Brapa_ESTC002055	AT4G39660	Symbols: AGT2 | AGT2 (ALANINE:GLYOXYLATE AMINOTRANSFERASE 2); alanine-glyoxylate transaminase | chr4:18406791-18409256 FORWARD	5754.84	4203.67
Brapa_ESTC002056	AT3G19590	Symbols: | WD-40 repeat family protein / mitotic checkpoint protein, putative | chr3:6805804-6808380 FORWARD	3496.79	1851.34
Brapa_ESTC002057	AT4G33360	Symbols: | terpene cyclase/mutase-related | chr4:16067992-16069377 REVERSE	830.12	172.014
Brapa_ESTC002058	AT5G42050	Symbols: | similar to unknown protein [Arabidopsis thaliana] (TAIR:AT3G27090.1); similar to N-rich protein [Glycine max] (GB:CAI44933.1); contains domain KELCH-RELATED PROTEINS (PTHR23230); contains domain no description (SM00767); contains domain gb def: Hypothetical protein At5g42050 (PTHR23230:SF16) | chr5:16832858-16834160 FORWARD	505.189	56.7112
Brapa_ESTC002059	AT1G19580	Symbols: GAMMA CA1 | GAMMA CA1 (GAMMA CARBONIC ANHYDRASE 1); carbonate dehydratase | chr1:6774928-6777083 FORWARD	994.197	2118.64
Brapa_ESTC002060	AT3G01820	Symbols: | adenylate kinase family protein | chr3:293988-295364 REVERSE	4129.51	3678.48
[truncated: 45,556 more rows]
