# Supplementary material for: Identification of Yellow Pigmentation Genes in Brassica rapa ssp. pekinensis Using Br300 Microarray
Source: Int J Genomics. 2014 Dec 31;2014:204969. doi: 10.1155/2014/204969 (PMC4297637; doi:10.1155/2014/204969)
Supplement: Supplementary file 1 — In this study, we used Br300K B. rapa microarray and identified three genes as functionally novel genes that involved in yellow color pigmentation. Supplementary figures (Figure S1 to S3) explains the information about plant materials and correlation coefficient of two experimental results. The three identified transcription factor genes are specifically expressed and confirmed their relatedness in yellow pigmentation. Table S1 to S9 supports our results and provides detailed annotation information of some differentially expressed genes. [file 204969.f1.zip › mat.204969.v2/Table S3.xls]

## Sheet: Up
Table S3. Number of genes expressed over 2-fold in yellow inner leaves
B. rapa SEQ_ID	TAIR7_cds ID	Description, blastN	PI value		Fold Change
			White leaves	Yellow leaves	Y/W	W/Y
Brapa_ESTC048334	no_hits_f	---------	12.873	21498.1	1670.01	0.000598797
Brapa_ESTC042517	no_hits_f	---------	16.0881	25294	1572.22	0.000636044
Brapa_ESTC028538	no_hits_f	---------	32.2786	16831.4	521.441	0.00191776
Brapa_ESTC005522	AT3G47540	| Symbols: | chitinase, putative | chr3:17532029-17532982 FORWARD	34.5374	13990.1	405.071	0.0024687
Brapa_ESTC006072	no_hits_f	---------	13.8436	4401.46	317.942	0.00314523
Brapa_ESTC000684	no_hits_f	---------	91.0218	28921.2	317.739	0.00314723
Brapa_ESTC005061	AT4G30660	Symbols: | hydrophobic protein, putative / low temperature and salt responsive protein, putative | chr4:14955476-14955950 FORWARD	37.784	11124.6	294.426	0.00339644
Brapa_ESTC047077	no_hits_f	---------	56.4722	15360.8	272.006	0.00367638
Brapa_ESTC002823	no_hits_f	---------	9.1996	2430.08	264.151	0.00378572
Brapa_ESTC048810	no_hits_f	---------	62.409	14519.8	232.656	0.0042982
Brapa_ESTC049103	no_hits_f	---------	6.6526	1502.8	225.897	0.0044268
Brapa_ESTC013802	AT5G14740	Symbols: CA18, BETA CA2, CA2 | CA2 (BETA CARBONIC ANHYDRASE 2); carbonate dehydratase/ zinc ion binding | chr5:4760539-4762385 FORWARD	38.5211	8063.83	209.335	0.00477702
Brapa_ESTC041578	no_hits_f	---------	86.7927	17882.8	206.04	0.00485342
Brapa_ESTC002681	no_hits_f	---------	175.036	29165.1	166.623	0.00600156
Brapa_ESTC010078	AT4G27360	Symbols: | dynein light chain, putative | chr4:13694038-13694523 FORWARD	124.368	20072.6	161.397	0.00619591
Brapa_ESTC002391	no_hits_f	---------	197.189	27114.8	137.507	0.00727238
Brapa_ESTC010121	AT4G10300	Symbols: | similar to unknown protein [Arabidopsis thaliana] (TAIR:AT3G04300.1); similar to Os04g0445200 [Oryza sativa (japonica cultivar-group)] (GB:NP_001052900.1); similar to Cupin, RmlC-type [Medicago truncatula] (GB:ABE82642.1); similar to OSIGBa0140O07.4 [Oryza sativa (indica cultivar-group)] (GB:CAH67236.1); contains InterPro domain Protein of unknown function DUF861, cupin_3; (InterPro:IP…	24.6588	3243.38	131.53	0.00760281
Brapa_ESTC042977	no_hits_f	---------	58.1578	7584.58	130.414	0.0076679
Brapa_ESTC051844	no_hits_f	---------	31.5718	3996.84	126.595	0.00789919
Brapa_ESTC048862	no_hits_f	---------	11.9184	1432.96	120.231	0.00831733
Brapa_ESTC004105	AT1G56190	Symbols: | phosphoglycerate kinase, putative | chr1:21032068-21034119 FORWARD	26.0623	2970.83	113.99	0.00877273
Brapa_ESTC048850	no_hits_f	---------	187.355	18359.2	97.9915	0.010205
Brapa_ESTC048809	no_hits_f	---------	168.136	16361	97.3081	0.0102766
Brapa_ESTC011275	AT3G58210	Symbols: | meprin and TRAF homology domain-containing protein / MATH domain-containing protein | chr3:21573622-21575044 REVERSE	184.58	17762.8	96.2336	0.0103914
Brapa_ESTC000252	AT4G37925	Symbols: NDH-M | NDH-M (SUBUNIT NDH-M OF NAD(P)H:PLASTOQUINONE DEHYDROGENASE COMPLEX) | chr4:17830742-17831479 REVERSE	104.927	8814.84	84.0093	0.0119034
Brapa_ESTC049305	no_hits_f	---------	100.028	8073.46	80.712	0.0123897
Brapa_ESTC051843	no_hits_f	---------	98.0062	7790.54	79.4903	0.0125802
Brapa_ESTC050737	AT3G44790	Symbols: | meprin and TRAF homology domain-containing protein / MATH domain-containing protein | chr3:16339779-16341252 FORWARD	356.531	27433.1	76.9445	0.0129964
Brapa_ESTC002680	AT1G15980	Symbols: | similar to Os08g0276100 [Oryza sativa (japonica cultivar-group)] (GB:NP_001061432.1); similar to COG0859: ADP-heptose:LPS heptosyltransferase [Nostoc punctiforme PCC 73102] (GB:ZP_00111141.1); contains domain UDP-Glycosyltransferase/glycogen phosphorylase (SSF53756) | chr1:5489308-5491193 FORWARD	252.22	18224.2	72.2552	0.0138398
Brapa_ESTC028729	no_hits_f	---------	14.9919	1054.74	70.354	0.0142138
Brapa_ESTC023810	AT3G55630	Symbols: ATDFD | ATDFD (A. THALIANA DHFS-FPGS HOMOLOG D); tetrahydrofolylpolyglutamate synthase | chr3:20647764-20650374 FORWARD	24.1049	1659.15	68.8304	0.0145285
Brapa_ESTC050303	no_hits_f	---------	25.001	1666.64	66.6629	0.0150008
Brapa_ESTC002994	no_hits_f	---------	116.343	7751.69	66.6279	0.0150087
Brapa_ESTC048333	no_hits_f	---------	900.865	59893.6	66.4845	0.0150411
Brapa_ESTC000621	AT3G55800	Symbols: SBPASE | SBPASE (sedoheptulose-bisphosphatase); phosphoric ester hydrolase | chr3:20720619-20722400 FORWARD	113.671	6712.48	59.0518	0.0169343
Brapa_ESTC002102	AT2G14610	Symbols: PR-1, PR1 | PR1 (PATHOGENESIS-RELATED GENE 1) | chr2:6249026-6249511 REVERSE	120.056	6651.04	55.3995	0.0180507
Brapa_ESTC050738	AT3G44790	Symbols: | meprin and TRAF homology domain-containing protein / MATH domain-containing protein | chr3:16339779-16341252 FORWARD	512.719	27782.1	54.1858	0.018455
Brapa_ESTC051549	AT5G53000	Symbols: TAP46 | TAP46 (2A PHOSPHATASE ASSOCIATED PROTEIN OF 46 KD) | chr5:21502880-21505095 REVERSE	27.4302	1445.31	52.6905	0.0189788
Brapa_ESTC009989	AT3G10450	Symbols: SCPL7 | SCPL7; serine carboxypeptidase | chr3:3249549-3252325 FORWARD	118.801	6253.27	52.6365	0.0189982
Brapa_ESTC022106	AT3G01500	Symbols: CA1 | CA1 (CARBONIC ANHYDRASE 1); carbonate dehydratase/ zinc ion binding | chr3:195180-196723 REVERSE	311.013	16365.7	52.6206	0.019004
Brapa_ESTC042390	AT2G14610	Symbols: PR-1, PR1 | PR1 (PATHOGENESIS-RELATED GENE 1) | chr2:6249026-6249511 REVERSE	173.582	8905.46	51.3041	0.0194916
Brapa_ESTC002699	AT2G39470	Symbols: | photosystem II reaction center PsbP family protein | chr2:16483413-16484731 FORWARD	287.304	14585.4	50.7664	0.0196981
Brapa_ESTC002879	AT1G69523	Symbols: | UbiE/COQ5 methyltransferase family protein | chr1:26133490-26134820 FORWARD	403.893	20353.1	50.3923	0.0198443
Brapa_ESTC036951	no_hits_f	---------	173.067	8609.99	49.7495	0.0201007
Brapa_ESTC026638	AT1G68010	Symbols: HPR | HPR (Hydroxypyruvate reductase); NAD binding / cofactor binding / oxidoreductase, acting on the CH-OH group of donors, NAD or NADP as acceptor | chr1:25497081-25499383 FORWARD	36.3661	1796.7	49.4059	0.0202405
Brapa_ESTC007593	AT5G14740	Symbols: CA18, BETA CA2, CA2 | CA2 (BETA CARBONIC ANHYDRASE 2); carbonate dehydratase/ zinc ion binding | chr5:4760539-4762385 FORWARD	378.646	17651.5	46.6174	0.0214512
Brapa_ESTC006582	AT5G14740	Symbols: CA18, BETA CA2, CA2 | CA2 (BETA CARBONIC ANHYDRASE 2); carbonate dehydratase/ zinc ion binding | chr5:4760539-4762385 FORWARD	268.402	12157	45.294	0.022078
Brapa_ESTC005593	AT1G18730	Symbols: | similar to Os02g0744000 [Oryza sativa (japonica cultivar-group)] (GB:NP_001048099.1) | chr1:6460617-6462098 FORWARD	344.78	15510.4	44.9864	0.022229
Brapa_ESTC019968	AT5G02120	Symbols: OHP | OHP (ONE HELIX PROTEIN) | chr5:419141-419630 FORWARD	282.472	12518.3	44.317	0.0225647
Brapa_ESTC002008	no_hits_f	---------	444.923	19448.4	43.7118	0.0228771
Brapa_ESTC002504	no_hits_f	---------	111.895	4819.83	43.0746	0.0232155
Brapa_ESTC000751	AT1G14700	Symbols: PAP3, ATPAP3 | ATPAP3/PAP3 (purple acid phosphatase 3); acid phosphatase/ protein serine/threonine phosphatase | chr1:5058675-5060983 FORWARD	103.09	4326.04	41.9637	0.0238301
Brapa_ESTC025396	AT3G62410	| Symbols: CP12, CP12-2 | CP12-2 | chr3:23101982-23102377 FORWARD	737.767	30849.4	41.8146	0.0239151
Brapa_ESTC016593	AT4G35450	Symbols: AFT, AKR2 | AKR2 (ANKYRIN REPEAT-CONTAINING PROTEIN 2); protein binding | chr4:16839867-16841764 FORWARD	227.748	9497.31	41.701	0.0239803
Brapa_ESTC013418	AT1G80180	Symbols: | similar to unknown protein [Arabidopsis thaliana] (TAIR:AT1G15400.3); similar to Os06g0601100 [Oryza sativa (japonica cultivar-group)] (GB:NP_001058003.1); similar to Os01g0174100 [Oryza sativa (japonica cultivar-group)] (GB:NP_001042161.1) | chr1:30161949-30162365 REVERSE	818.234	33437.6	40.8656	0.0244705
Brapa_ESTC013704	AT5G52100	Symbols: | dihydrodipicolinate reductase family protein | chr5:21187429-21189333 FORWARD	462.694	18255.2	39.4542	0.0253459
Brapa_ESTC000939	AT4G39710	Symbols: | immunophilin, putative / FKBP-type peptidyl-prolyl cis-trans isomerase, putative | chr4:18427243-18428319 REVERSE	222.085	8684.77	39.1056	0.0255718
Brapa_ESTC048903	no_hits_f	---------	403.911	15662.7	38.7776	0.0257881
Brapa_ESTC010456	AT5G52100	Symbols: | dihydrodipicolinate reductase family protein | chr5:21187429-21189333 FORWARD	428.069	16368.7	38.2385	0.0261517
Brapa_ESTC012792	AT1G21750	Symbols: ATPDIL1-1 | ATPDIL1-1 (PDI-LIKE 1-1); protein disulfide isomerase | chr1:7645756-7648503 FORWARD	589.267	22386.2	37.9899	0.0263228
Brapa_ESTC006419	AT3G10450	Symbols: SCPL7 | SCPL7; serine carboxypeptidase | chr3:3249775-3252325 FORWARD	112.953	4251.39	37.6386	0.0265685
Brapa_ESTC036155	AT1G72610	Symbols: GLP1 | GLP1 (GERMIN-LIKE PROTEIN 1); manganese ion binding / metal ion binding / nutrient reservoir | chr1:27342964-27343590 REVERSE	259.6	9761.47	37.602	0.0265944
Brapa_ESTC040038	AT1G26580	Symbols: | similar to myb family transcription factor / ELM2 domain-containing protein [Arabidopsis thaliana] (TAIR:AT2G03470.1); similar to Os03g0425800 [Oryza sativa (japonica cultivar-group)] (GB:NP_001050406.1); similar to expressed protein [Oryza sativa (japonica cultivar-group)] (GB:AAS07212.1) | chr1:9185607-9187200 FORWARD	616.055	23112.5	37.5169	0.0266546
Brapa_ESTC048717	no_hits_f	---------	51.7276	1871.12	36.1726	0.0276453
Brapa_ESTC010556	AT5G20630	Symbols: GLP3A, GLP3B, GLP3 | GLP3 (GERMIN-LIKE PROTEIN 3); manganese ion binding / metal ion binding / nutrient reservoir | chr5:6975317-6975952 REVERSE	153.055	5507.88	35.9863	0.0277884
Brapa_ESTC014415	AT1G77122	Symbols: | similar to unknown protein [Arabidopsis thaliana] (TAIR:AT1G69210.1); similar to Os04g0438300 [Oryza sativa (japonica cultivar-group)] (GB:NP_001052862.1); similar to H0315A08.11 [Oryza sativa (indica cultivar-group)] (GB:CAH67581.1); contains InterPro domain Protein of unknown function DUF150; (InterPro:IPR003728) | chr1:28982321-28983568 REVERSE	68.6313	2452.09	35.7285	0.0279889
Brapa_ESTC051911	AT2G31530	Symbols: EMB2289, SCY2 | EMB2289/SCY2 (EMBRYO DEFECTIVE 2289, SECY HOMOLOG 2); protein translocase | chr2:13434485-13437385 FORWARD	33.1627	1181.52	35.628	0.0280678
Brapa_ESTC049863	no_hits_f	---------	88.7845	3069.05	34.5674	0.028929
Brapa_ESTC028641	no_hits_f	---------	58.3782	2001.04	34.2772	0.0291739
Brapa_ESTC012938	AT1G01080	Symbols: | 33 kDa ribonucleoprotein, chloroplast, putative / RNA-binding protein cp33, putative | chr1:45503-46789 REVERSE	186.128	6281.75	33.7496	0.02963
Brapa_ESTC029406	no_hits_f	---------	79.0181	2641.64	33.4308	0.0299125
Brapa_ESTC048861	no_hits_f	---------	320.473	10640.9	33.2037	0.0301171
Brapa_ESTC003496	no_hits_f	---------	500.733	16517.2	32.986	0.0303159
Brapa_ESTC048904	no_hits_f	---------	211.488	6873.13	32.4989	0.0307703
Brapa_ESTC029398	AT2G31530	Symbols: EMB2289, SCY2 | EMB2289/SCY2 (EMBRYO DEFECTIVE 2289, SECY HOMOLOG 2); protein translocase | chr2:13434485-13437385 FORWARD	397.991	12914.8	32.45	0.0308167
Brapa_ESTC000272	AT3G01500	Symbols: CA1 | CA1 (CARBONIC ANHYDRASE 1); carbonate dehydratase/ zinc ion binding | chr3:195180-196723 REVERSE	245.274	7816.25	31.8674	0.03138
Brapa_ESTC029013	AT1G26580	Symbols: | similar to myb family transcription factor / ELM2 domain-containing protein [Arabidopsis thaliana] (TAIR:AT2G03470.1); similar to Os03g0425800 [Oryza sativa (japonica cultivar-group)] (GB:NP_001050406.1); similar to expressed protein [Oryza sativa (japonica cultivar-group)] (GB:AAS07212.1) | chr1:9185607-9187200 FORWARD	138.987	4359.39	31.3655	0.0318822
Brapa_ESTC050040	no_hits_f	---------	33.0564	1032.97	31.2487	0.0320013
Brapa_ESTC002503	AT5G45680	Symbols: | FK506-binding protein 1 (FKBP13) | chr5:18548121-18549355 FORWARD	90.4545	2809.5	31.0598	0.0321959
Brapa_ESTC029348	no_hits_f	---------	71.8189	2187.08	30.4527	0.0328378
Brapa_ESTC045302	no_hits_f	---------	297.453	9027.25	30.3485	0.0329506
Brapa_ESTC016202	AT5G42760	Symbols: | similar to hypothetical protein [Oryza sativa (japonica cultivar-group)] (GB:AAN65019.1); contains InterPro domain O-methyltransferase, N-terminal; (InterPro:IPR003455); contains InterPro domain Protein of unknown function Mtu_121; (InterPro:IPR011610) | chr5:17166181-17167333 FORWARD	144.506	4369.73	30.2391	0.0330698
Brapa_ESTC004197	AT1G50730	Symbols: | similar to hypothetical protein DDBDRAFT_0217150 [Dictyostelium discoideum AX4] (GB:XP_644589.1); contains domain ESOPHAGEAL CANCER ASSOCIATED PROTEIN (PTHR13673) | chr1:18798943-18806931 FORWARD	50.6004	1525.25	30.143	0.0331752
Brapa_ESTC049751	no_hits_f	---------	672.836	20100.4	29.8741	0.0334738
Brapa_ESTC051512	AT4G17900	Symbols: | zinc-binding family protein | chr4:9946059-9947710 FORWARD	363.081	10508	28.9412	0.0345528
Brapa_ESTC001817	no_hits_f	---------	582.595	16828.2	28.8849	0.0346202
Brapa_ESTC013724	AT4G09010	Symbols: APX4 | APX4 (ASCORBATE PEROXIDASE 4); peroxidase | chr4:5777499-5779335 REVERSE	437.791	12439.7	28.4147	0.0351931
Brapa_ESTC004334	AT1G18730	Symbols: | similar to Os02g0744000 [Oryza sativa (japonica cultivar-group)] (GB:NP_001048099.1) | chr1:6460617-6462098 FORWARD	222.513	6302.04	28.3221	0.0353081
Brapa_ESTC025276	AT1G30320	Symbols: | remorin family protein | chr1:10680330-10682834 FORWARD	200.56	5578.74	27.8158	0.0359508
Brapa_ESTC023800	AT5G14740	Symbols: CA18, BETA CA2, CA2 | CA2 (BETA CARBONIC ANHYDRASE 2); carbonate dehydratase/ zinc ion binding | chr5:4760539-4762385 FORWARD	218.9	6012.08	27.465	0.03641
Brapa_ESTC050134	no_hits_f	---------	321.355	8777.89	27.3152	0.0366096
Brapa_ESTC002291	no_hits_f	---------	1266.4	34080	26.9109	0.0371596
Brapa_ESTC048849	no_hits_f	---------	1067.1	28433.9	26.646	0.0375291
Brapa_ESTC009534	AT1G70820	Symbols: | phosphoglucomutase, putative / glucose phosphomutase, putative | chr1:26709256-26711696 FORWARD	67.9389	1807.12	26.5992	0.0375951
Brapa_ESTC002674	AT5G38430	Symbols: | ribulose bisphosphate carboxylase small chain 1B / RuBisCO small subunit 1B (RBCS-1B) (ATS1B) | chr5:15401580-15402385 REVERSE	1063.34	27991.2	26.3238	0.0379884
Brapa_ESTC051084	no_hits_f	---------	89.8578	2194.31	24.4198	0.0409504
Brapa_ESTC014463	AT4G34090	Symbols: | similar to unknown protein [Arabidopsis thaliana] (TAIR:AT2G23370.1); similar to Hypothetical protein [Oryza sativa (japonica cultivar-group)] (GB:AAN61482.1); similar to Os03g0109700 [Oryza sativa (japonica cultivar-group)] (GB:NP_001048710.1); contains domain TPR-like (SSF48452) | chr4:16328056-16330115 REVERSE	477.419	11640.3	24.3817	0.0410143
Brapa_ESTC022580	AT3G56290	Symbols: | similar to Os01g0823600 [Oryza sativa (japonica cultivar-group)] (GB:NP_001044661.1); similar to unnamed protein product [Ostreococcus tauri] (GB:CAL58546.1) | chr3:20889722-20890520 REVERSE	102.907	2481	24.1091	0.041478
Brapa_ESTC020259	AT3G01440	Symbols: | oxygen evolving enhancer 3 (PsbQ) family protein | chr3:168485-169414 FORWARD	47.4982	1130.22	23.795	0.0420256
Brapa_ESTC019779	AT5G52100	Symbols: | dihydrodipicolinate reductase family protein | chr5:21187429-21189333 FORWARD	428.105	10158.3	23.7285	0.0421434
Brapa_ESTC039936	no_hits_f	---------	75.076	1749.27	23.3	0.0429185
Brapa_ESTC013370	AT4G09350	Symbols: | DNAJ heat shock N-terminal domain-containing protein | chr4:5931314-5932149 REVERSE	298.826	6781.81	22.6948	0.0440629
Brapa_ESTC035004	AT1G15860	| Symbols: | calcium ion binding | chr1:5455050-5456735 FORWARD	497.587	11041.6	22.1903	0.0450648
Brapa_ESTC047771	no_hits_f	---------	117.436	2583.96	22.0031	0.0454481
Brapa_ESTC021036	AT1G01080	Symbols: | 33 kDa ribonucleoprotein, chloroplast, putative / RNA-binding protein cp33, putative | chr1:45503-46789 REVERSE	386.893	8384.39	21.6711	0.0461444
Brapa_ESTC031870	AT1G72730	Symbols: | eukaryotic translation initiation factor 4A, putative / eIF-4A, putative | chr1:27381702-27383255 REVERSE	83.1762	1802.11	21.6662	0.0461549
Brapa_ESTC028491	AT1G14700	Symbols: PAP3, ATPAP3 | ATPAP3/PAP3 (purple acid phosphatase 3) | chr1:5058675-5060983 FORWARD	141.052	3018.13	21.3973	0.0467349
Brapa_ESTC048855	no_hits_f	---------	189.255	3946.85	20.8547	0.0479509
Brapa_ESTC023883	AT3G05180	Symbols: | GDSL-motif lipase/hydrolase family protein | chr3:1468605-1470535 REVERSE	655.094	13661.5	20.8543	0.0479518
Brapa_ESTC002769	AT3G05180	Symbols: | GDSL-motif lipase/hydrolase family protein | chr3:1468605-1470535 REVERSE	519.761	10837.3	20.8505	0.0479604
Brapa_ESTC026131	AT3G15354	Symbols: SPA3 | SPA3 (SPA1-RELATED 3); signal transducer | chr3:5169334-5172487 REVERSE	537.803	11158	20.7474	0.0481989
Brapa_ESTC035530	AT3G55800	Symbols: SBPASE | SBPASE (sedoheptulose-bisphosphatase); phosphoric ester hydrolase | chr3:20720619-20722400 FORWARD	323.889	6674.02	20.6059	0.0485298
Brapa_ESTC051922	no_hits_f	---------	196.631	4048.47	20.5892	0.0485692
Brapa_ESTC020545	AT5G40230	| Symbols: | nodulin-related | chr5:16097042-16098963 REVERSE	262.053	5366.91	20.4802	0.0488275
Brapa_ESTC050133	no_hits_f	---------	229.95	4704.58	20.4591	0.0488779
Brapa_ESTC029601	no_hits_f	---------	71.534	1444.76	20.1968	0.0495127
Brapa_ESTC048303	AT2G05530	| Symbols: | glycine-rich protein | chr2:2029752-2030317 FORWARD	2029.02	40880.9	20.1481	0.0496325
Brapa_ESTC002146	AT2G16760	Symbols: | similar to unknown protein [Arabidopsis thaliana] (TAIR:AT2G47370.1); similar to Os03g0307400 [Oryza sativa (japonica cultivar-group)] (GB:NP_001049896.1); similar to Os10g0443000 [Oryza sativa (japonica cultivar-group)] (GB:NP_001064702.1); similar to hypothetical protein LOC_Os10g30620 [Oryza sativa (japonica cultivar-group)] (GB:AAP53978.2); contains InterPro domain Soluble quinopro…	65.2798	1312.79	20.1102	0.049726
Brapa_ESTC002772	AT3G14650	Symbols: CYP72A11 | CYP72A11 (cytochrome P450, family 72, subfamily A, polypeptide 11); oxygen binding | chr3:4922213-4924172 FORWARD	254.456	5058.91	19.8813	0.0502986
Brapa_ESTC004133	AT2G28430	Symbols: | similar to unknown [Hyacinthus orientalis] (GB:AAT08697.1) | chr2:12166813-12167464 REVERSE	79.7145	1547.51	19.4132	0.0515115
Brapa_ESTC005600	AT5G01750	Symbols: | Identical to Protein At5g01750 [Arabidopsis Thaliana] (GB:Q9LZX1;GB:Q8LEK9); similar to unknown protein [Arabidopsis thaliana] (TAIR:AT3G11740.1); similar to Protein of unknown function DUF567 [Medicago truncatula] (GB:ABE88873.1); contains InterPro domain Protein of unknown function DUF567; (InterPro:IPR007612) | chr5:290031-291106 FORWARD	339.791	6586.86	19.385	0.0515862
Brapa_ESTC027205	AT5G56850	Symbols: | similar to unknown protein [Arabidopsis thaliana] (TAIR:AT2G22795.1); similar to GA14882-PA [Drosophila pseudoobscura] (GB:EAL32833.1) | chr5:23002658-23004237 REVERSE	114.1	2206.22	19.3358	0.0517174
Brapa_ESTC034154	AT3G15310	Symbols: | similar to unknown protein [Arabidopsis thaliana] (TAIR:AT5G32621.1); similar to hypothetical protein 24.t00017 [Brassica oleracea] (GB:ABD64939.1); contains InterPro domain Protein of unknown function DUF635; (InterPro:IPR006912); contains InterPro domain Bacterial adhesion; (InterPro:IPR008966) | chr3:5152289-5153536 REVERSE	178.832	3433.54	19.1998	0.0520839
Brapa_ESTC006258	AT3G57240	Symbols: BG3 | BG3 (BETA-1,3-GLUCANASE 3); hydrolase, hydrolyzing O-glycosyl compounds | chr3:21192895-21194024 REVERSE	168.118	3164.57	18.8235	0.0531251
Brapa_ESTC002724	AT5G58260	Symbols: | Encodes subunit NDH-N of NAD(P)H:plastoquinone dehydrogenase complex (Ndh complex) present in the thylakoid membrane of chloroplasts. This subunit is thought to be required for Ndh complex assembly. | chr5:23578301-23579155 REVERSE	1126.22	20964.7	18.6151	0.0537198
Brapa_ESTC005814	AT2G19800	Symbols: MIOX2 | MIOX2 (MYO-INOSITOL OXYGENASE 2) | chr2:8538188-8540436 REVERSE	62.3061	1151.18	18.4762	0.0541237
Brapa_ESTC001957	AT3G55800	Symbols: SBPASE | SBPASE (sedoheptulose-bisphosphatase); phosphoric ester hydrolase | chr3:20720619-20722400 FORWARD	346.392	6384.21	18.4306	0.0542576
Brapa_ESTC040170	AT1G29670	Symbols: | GDSL-motif lipase/hydrolase family protein | chr1:10375829-10377703 FORWARD	779.014	14248.4	18.2903	0.0546738
Brapa_ESTC000639	AT5G15230	Symbols: GASA4 | GASA4 (GAST1 PROTEIN HOMOLOG 4) | chr5:4945020-4946028 FORWARD	94.701	1710.35	18.0605	0.0553694
Brapa_ESTC035168	no_hits_f	---------	217.786	3868.99	17.7651	0.0562901
Brapa_ESTC006213	AT1G20020	Symbols: ATLFNR2 | ATLFNR2 (LEAF FNR 2) | chr1:6942842-6944859 FORWARD	617.61	10910.2	17.6652	0.0566085
Brapa_ESTC048711	no_hits_f	---------	79.488	1399.76	17.6097	0.0567869
Brapa_ESTC011411	AT4G25260	Symbols: | invertase/pectin methylesterase inhibitor family protein | chr4:12936015-12936620 REVERSE	1351.99	23631	17.4787	0.0572126
Brapa_ESTC024558	AT3G25520	Symbols: ATL5 | ATL5 (A. THALIANA RIBOSOMAL PROTEIN L5); structural constituent of ribosome | chr3:9270810-9272564 REVERSE	398.286	6925.73	17.3888	0.0575082
Brapa_ESTC010425	AT3G05180	Symbols: | GDSL-motif lipase/hydrolase family protein | chr3:1468605-1470535 REVERSE	522.837	9085.55	17.3774	0.057546
Brapa_ESTC003714	no_hits_f	---------	446.578	7751.97	17.3586	0.0576083
Brapa_ESTC007741	AT4G31130	Symbols: | similar to Protein of unknown function DUF1218 [Medicago truncatula] (GB:ABE80387.1); contains InterPro domain Protein of unknown function DUF1218; (InterPro:IPR009606) | chr4:15137165-15138471 REVERSE	3269.92	56270.6	17.2086	0.0581106
Brapa_ESTC047526	AT3G55800	Symbols: SBPASE | SBPASE (sedoheptulose-bisphosphatase); phosphoric ester hydrolase | chr3:20720619-20722400 FORWARD	440.323	7571.65	17.1957	0.0581542
Brapa_ESTC015810	AT3G47540	| Symbols: | chitinase, putative | chr3:17532029-17532982 FORWARD	3110.61	53199.5	17.1026	0.0584707
Brapa_ESTC016509	AT4G00752	Symbols: | UBX domain-containing protein | chr4:317771-320793 REVERSE	108.937	1832.77	16.8241	0.0594384
Brapa_ESTC036064	no_hits_f	---------	167.424	2806.12	16.7606	0.0596639
Brapa_ESTC049864	no_hits_f	---------	148.473	2485.32	16.7392	0.05974
Brapa_ESTC003354	AT1G29670	Symbols: | GDSL-motif lipase/hydrolase family protein | chr1:10375829-10377703 FORWARD	457.638	7610.58	16.6301	0.0601318
Brapa_ESTC013161	AT1G51200	Symbols: | DNA binding / zinc ion binding | chr1:18989358-18989879 FORWARD	160.843	2673.74	16.6233	0.0601566
Brapa_ESTC008734	AT3G15354	Symbols: SPA3 | SPA3 (SPA1-RELATED 3); signal transducer | chr3:5169334-5172487 REVERSE	502.2	8319.96	16.567	0.0603609
Brapa_ESTC013929	AT3G01500	Symbols: CA1 | CA1 (CARBONIC ANHYDRASE 1); carbonate dehydratase/ zinc ion binding | chr3:194860-197880 REVERSE	259.471	4296.41	16.5583	0.0603925
Brapa_ESTC022926	AT3G16250	| Symbols: | ferredoxin-related | chr3:5507097-5508326 REVERSE	230.566	3812.44	16.5351	0.0604773
Brapa_ESTC036075	AT3G10450	Symbols: SCPL7 | SCPL7; serine carboxypeptidase | chr3:3249549-3252325 FORWARD	767.993	12512.7	16.2927	0.0613771
Brapa_ESTC011158	AT2G35130	Symbols: | pentatricopeptide (PPR) repeat-containing protein | chr2:14814668-14817243 REVERSE	81.8625	1330.67	16.2549	0.0615198
Brapa_ESTC026648	AT1G14150	Symbols: | oxygen evolving enhancer 3 (PsbQ) family protein | chr1:4839882-4840629 FORWARD	230.921	3710.38	16.0677	0.0622365
Brapa_ESTC024040	AT2G06850	Symbols: EXT, EXGT-A1 | EXGT-A1 (ENDO-XYLOGLUCAN TRANSFERASE); hydrolase, acting on glycosyl bonds | chr2:2763616-2765487 FORWARD	1247.35	19972.4	16.0119	0.0624537
Brapa_ESTC013919	no_hits_f	---------	176.766	2815.67	15.9288	0.0627794
Brapa_ESTC013093	AT3G01440	Symbols: | oxygen evolving enhancer 3 (PsbQ) family protein | chr3:168485-169414 FORWARD	107.668	1691.19	15.7075	0.063664
Brapa_ESTC001756	AT1G07660	| Symbols: | histone H4 | chr1:2369209-2369520 FORWARD	308.806	4792.32	15.5189	0.0644377
Brapa_ESTC049075	AT1G27910	Symbols: | U-box domain-containing protein | chr1:9720949-9723962 REVERSE	112.974	1748.61	15.478	0.0646079
Brapa_ESTC003771	AT3G16240	Symbols: TIP2;1, DELTA-TIP1, AQP1, ATTIP2;1, DELTA-TIP | DELTA-TIP (delta tonoplast integral protein); water channel | chr3:5505540-5506794 FORWARD	638.291	9852.51	15.4358	0.0647846
Brapa_ESTC048867	no_hits_f	---------	289.694	4440.2	15.3272	0.0652435
Brapa_ESTC001920	AT2G40100	Symbols: LHCB4.3 | LHCB4.3 (LIGHT HARVESTING COMPLEX PSII); chlorophyll binding | chr2:16752962-16754268 FORWARD	66.0485	1011.44	15.3136	0.0653015
Brapa_ESTC006599	AT3G14770	Symbols: | nodulin MtN3 family protein | chr3:4957794-4959209 REVERSE	83.7599	1280.19	15.284	0.0654277
Brapa_ESTC036360	no_hits_f	---------	487.574	7418.32	15.2148	0.0657257
Brapa_ESTC016708	AT1G22700	Symbols: | tetratricopeptide repeat (TPR)-containing protein | chr1:8028312-8029867 REVERSE	304.688	4630.24	15.1967	0.0658039
Brapa_ESTC036076	AT3G10450	Symbols: SCPL7 | SCPL7; serine carboxypeptidase | chr3:3249775-3252325 FORWARD	393.907	5981.7	15.1856	0.065852
Brapa_ESTC004251	AT1G51110	Symbols: | plastid-lipid associated protein PAP / fibrillin family protein | chr1:18939048-18941152 FORWARD	1056.23	15933.5	15.0853	0.0662899
Brapa_ESTC023676	AT3G56290	Symbols: | similar to Os01g0823600 [Oryza sativa (japonica cultivar-group)] (GB:NP_001044661.1); similar to unnamed protein product [Ostreococcus tauri] (GB:CAL58546.1) | chr3:20889722-20890520 REVERSE	80.2295	1208.58	15.064	0.0663833
Brapa_ESTC013547	AT1G51110	Symbols: | plastid-lipid associated protein PAP / fibrillin family protein | chr1:18939048-18941152 FORWARD	506.288	7607.24	15.0255	0.0665534
Brapa_ESTC036290	AT3G15930	Symbols: | pentatricopeptide (PPR) repeat-containing protein | chr3:5387450-5389696 FORWARD	75.8051	1130.21	14.9094	0.0670717
Brapa_ESTC026931	AT5G16030	Symbols: | similar to unknown protein [Arabidopsis thaliana] (TAIR:AT3G02500.1); similar to hypothetical protein [Cleome spinosa] (GB:ABD96956.1) | chr5:5238245-5240581 FORWARD	436.424	6498.72	14.8908	0.0671554
Brapa_ESTC005592	AT2G42910	Symbols: | ribose-phosphate pyrophosphokinase 4 / phosphoribosyl diphosphate synthetase 4 (PRS4) | chr2:17863473-17865471 FORWARD	105.455	1568.53	14.8739	0.0672317
Brapa_ESTC042287	AT2G06850	Symbols: EXT, EXGT-A1 | EXGT-A1 (ENDO-XYLOGLUCAN TRANSFERASE); hydrolase, acting on glycosyl bonds | chr2:2763616-2765487 FORWARD	3666.7	53471.6	14.583	0.0685728
Brapa_ESTC013902	AT4G37925	Symbols: NDH-M | NDH-M (SUBUNIT NDH-M OF NAD(P)H:PLASTOQUINONE DEHYDROGENASE COMPLEX) | chr4:17830742-17831479 REVERSE	380.972	5500.44	14.4379	0.0692621
Brapa_ESTC018314	AT2G40280	Symbols: | dehydration-responsive family protein | chr2:16832785-16835378 REVERSE	369.767	5327.91	14.4088	0.0694019
Brapa_ESTC022779	AT1G78180	| Symbols: | binding | chr1:29421812-29423418 FORWARD	709.383	10207.5	14.3893	0.0694963
Brapa_ESTC022142	AT3G23760	Symbols: | similar to transferase, transferring glycosyl groups [Arabidopsis thaliana] (TAIR:AT4G14100.1); similar to conserved hypothetical protein [Medicago truncatula] (GB:ABE80211.1); contains domain Cystatin/monellin (SSF54403) | chr3:8562972-8564647 REVERSE	102.444	1465.53	14.3057	0.0699024
Brapa_ESTC003316	AT4G39300	Symbols: | similar to unknown protein [Arabidopsis thaliana] (TAIR:AT3G13674.1); similar to conserved hypothetical protein [Medicago truncatula] (GB:ABE82724.1) | chr4:18286829-18287817 FORWARD	80.6542	1148.68	14.242	0.0702147
Brapa_ESTC011620	AT5G52970	Symbols: | thylakoid lumen 15.0 kDa protein | chr5:21496846-21498244 FORWARD	456.404	6459.72	14.1535	0.0706538
Brapa_ESTC005627	AT1G56140	Symbols: | leucine-rich repeat family protein / protein kinase family protein | chr1:21005373-21011390 REVERSE	192.228	2713.06	14.1138	0.0708528
Brapa_ESTC007443	AT2G34860	Symbols: EDA3 | EDA3 (embryo sac development arrest 3) | chr2:14715459-14716883 FORWARD	355.158	4972.84	14.0018	0.0714196
Brapa_ESTC048871	no_hits_f	---------	167.725	2329.99	13.8917	0.0719853
Brapa_ESTC020737	AT3G55630	Symbols: ATDFD | ATDFD (A. THALIANA DHFS-FPGS HOMOLOG D); tetrahydrofolylpolyglutamate synthase | chr3:20647764-20650374 FORWARD	323.159	4432.02	13.7147	0.0729146
Brapa_ESTC048444	no_hits_f	---------	515.959	7073.04	13.7085	0.0729473
Brapa_ESTC004652	no_hits_f	---------	583.514	7950.18	13.6247	0.0733963
Brapa_ESTC021080	AT5G51010	Symbols: | rubredoxin family protein | chr5:20761841-20762570 FORWARD	1041.9	14190.3	13.6196	0.0734234
Brapa_ESTC029752	AT4G14390	Symbols: | ankyrin repeat family protein | chr4:8289640-8292079 FORWARD	74.1727	1004.83	13.5472	0.0738162
Brapa_ESTC051425	no_hits_f	---------	356.724	4796.11	13.4449	0.0743778
Brapa_ESTC023023	AT5G28750	Symbols: | thylakoid assembly protein, putative | chr5:10784146-10785681 REVERSE	332.852	4398.91	13.2158	0.0756669
Brapa_ESTC027603	AT5G03900	Symbols: | Identical to Protein At5g03900 precursor [Arabidopsis Thaliana] (GB:Q8GW20;GB:Q8L632;GB:Q8LG15;GB:Q9FFM9;GB:Q9LZB9); similar to unknown protein [Oryza sativa (japonica cultivar-group)] (GB:BAD28426.1); similar to Os02g0533000 [Oryza sativa (japonica cultivar-group)] (GB:NP_001047028.1); contains InterPro domain HesB/YadR/YfhF; (InterPro:IPR000361) | chr5:1048337-1051868 FORWARD	538.863	7121.01	13.2149	0.0756723
Brapa_ESTC028179	no_hits_f	---------	604.755	7991.54	13.2145	0.0756744
Brapa_ESTC025730	AT1G02500	Symbols: SAM-1, MAT1, SAM1 | SAM1 (S-adenosylmethionine synthetase 1); methionine adenosyltransferase | chr1:519037-520218 FORWARD	100.317	1313.17	13.0902	0.076393
Brapa_ESTC012459	AT1G62770	Symbols: | invertase/pectin methylesterase inhibitor family protein | chr1:23249750-23250501 REVERSE	179.523	2335.47	13.0093	0.076868
Brapa_ESTC031484	no_hits_f	---------	265.824	3455.84	13.0005	0.0769202
Brapa_ESTC004214	AT5G55210	Symbols: | similar to unknown protein [Arabidopsis thaliana] (TAIR:AT4G22320.1); similar to conserved hypothetical protein [Medicago truncatula] (GB:ABD28485.1) | chr5:22413933-22414600 REVERSE	131.053	1691.19	12.9046	0.0774916
Brapa_ESTC035912	no_hits_f	---------	509.945	6576.91	12.8973	0.0775357
Brapa_ESTC051307	no_hits_f	---------	650.244	8379.87	12.8873	0.077596
Brapa_ESTC037603	AT3G05625	| Symbols: | binding | chr3:1632414-1633918 FORWARD	179.73	2315.22	12.8817	0.0776298
Brapa_ESTC043709	AT3G53850	Symbols: | similar to integral membrane protein, putative [Arabidopsis thaliana] (TAIR:AT5G02060.1); similar to Os09g0249400 [Oryza sativa (japonica cultivar-group)] (GB:NP_001062672.1); similar to Protein of unknown function DUF588 [Medicago truncatula] (GB:ABE82916.1); contains InterPro domain Protein of unknown function DUF588; (InterPro:IPR006702) | chr3:19959240-19959972 REVERSE	527.859	6773.29	12.8316	0.0779324
Brapa_ESTC002232	AT2G19760	Symbols: PFN1, PRF1 | PFN1/PRF1 (PROFILIN 1); actin binding | chr2:8524156-8525149 REVERSE	105.897	1340.97	12.663	0.0789704
Brapa_ESTC048712	no_hits_f	---------	104.568	1321.49	12.6376	0.0791289
Brapa_ESTC051749	no_hits_f	---------	195.028	2452.17	12.5734	0.0795328
Brapa_ESTC035536	AT3G56220	Symbols: | similar to unknown protein [Arabidopsis thaliana] (TAIR:AT2G40435.1); similar to Os03g0338400 [Oryza sativa (japonica cultivar-group)] (GB:NP_001050055.1); similar to hypothetical protein [Oryza sativa (japonica cultivar-group)] (GB:BAC10078.1); contains InterPro domain Helix-loop-helix DNA-binding; (InterPro:IPR011598) | chr3:20869920-20871281 FORWARD	418.031	5250.67	12.5605	0.0796148
Brapa_ESTC025847	AT5G08130	Symbols: BIM1 | BIM1 (BES1-interacting Myc-like protein 1); DNA binding / transcription factor | chr5:2606656-2608653 REVERSE	280.473	3517.45	12.5411	0.0797376
Brapa_ESTC037912	AT2G43570	| Symbols: | chitinase, putative | chr2:18083466-18084512 REVERSE	503.271	6310.45	12.5389	0.079752
Brapa_ESTC002949	AT1G70760	Symbols: | inorganic carbon transport protein-related | chr1:26690929-26691863 FORWARD	457.906	5721.16	12.4942	0.0800373
Brapa_ESTC049595	AT2G15970	Symbols: WCOR413, WCOR413-LIKE, ATCOR413-PM1, FL3-5A3, COR413-PM1 | COR413-PM1 (cold regulated 413 plasma membrane 1) | chr2:6957245-6958094 FORWARD	508.628	6351.66	12.4878	0.080078
Brapa_ESTC013668	AT3G29185	Symbols: | similar to hypothetical protein MtrDRAFT_AC147482g2v1 [Medicago truncatula] (GB:ABD32485.1) | chr3:11156329-11158444 REVERSE	714.849	8918.86	12.4766	0.0801503
Brapa_ESTC010535	AT3G51870	Symbols: | mitochondrial substrate carrier family protein | chr3:19254955-19257588 FORWARD	1443.17	17943.7	12.4335	0.0804277
Brapa_ESTC036555	AT1G55480	Symbols: | binding / protein binding | chr1:20717488-20719017 FORWARD	397.901	4923.48	12.3736	0.080817
Brapa_ESTC006452	AT2G41940	Symbols: ZFP8 | ZFP8 (ZINC FINGER PROTEIN 8); nucleic acid binding / transcription factor/ zinc ion binding | chr2:17514634-17515407 FORWARD	268.643	3322.53	12.3678	0.080855
Brapa_ESTC005164	AT4G27657	Symbols: | similar to unknown protein [Arabidopsis thaliana] (TAIR:AT4G27652.1) | chr4:13813130-13813318 FORWARD	92.2659	1132.4	12.2732	0.0814782
Brapa_ESTC051021	no_hits_f	---------	143.663	1732.07	12.0565	0.082943
Brapa_ESTC048985	no_hits_f	---------	405.468	4883.6	12.0444	0.0830265
Brapa_ESTC009471	AT1G70760	Symbols: | inorganic carbon transport protein-related | chr1:26690929-26691863 FORWARD	1080.92	13002.3	12.0289	0.083133
Brapa_ESTC022742	AT2G23000	Symbols: SCPL10 | SCPL10 (serine carboxypeptidase-like 10); serine carboxypeptidase | chr2:9799364-9802821 FORWARD	89.1578	1069.4	11.9945	0.0833718
Brapa_ESTC030697	no_hits_f	---------	100.749	1207.84	11.9886	0.0834125
Brapa_ESTC018741	AT3G48200	Symbols: | similar to Os05g0594500 [Oryza sativa (japonica cultivar-group)] (GB:NP_001056507.1); similar to IMP dehydrogenase/GMP reductase [Medicago truncatula] (GB:ABE93579.1); contains domain gb def: Hypothetical protein At3g48200 (PTHR12326:SF1); contains domain UNCHARACTERIZED (PTHR12326) | chr3:17843934-17848356 REVERSE	361.858	4293.33	11.8647	0.0842838
Brapa_ESTC003796	AT1G22690	Symbols: | gibberellin-responsive protein, putative | chr1:8027317-8027950 FORWARD	139.676	1656.99	11.8631	0.084295
Brapa_ESTC014286	AT5G22800	Symbols: | aminoacyl-tRNA synthetase family protein | chr5:7616224-7619964 REVERSE	483.285	5698.41	11.791	0.0848105
Brapa_ESTC002910	AT2G43570	| Symbols: | chitinase, putative | chr2:18083466-18084512 REVERSE	129.592	1521.05	11.7372	0.085199
Brapa_ESTC006903	AT4G01460	Symbols: | basic helix-loop-helix (bHLH) family protein | chr4:621334-622697 FORWARD	103.945	1219.94	11.7364	0.085205
Brapa_ESTC026840	AT1G06550	Symbols: | enoyl-CoA hydratase/isomerase family protein | chr1:2003833-2006563 REVERSE	126.582	1480.47	11.6957	0.0855012
Brapa_ESTC013784	AT2G43590	| Symbols: | chitinase, putative | chr2:18088669-18089826 REVERSE	2994.1	34955.4	11.6748	0.0856549
Brapa_ESTC047686	no_hits_f	---------	1270.21	14823.1	11.6698	0.0856913
Brapa_ESTC002554	AT4G29020	| Symbols: | glycine-rich protein | chr4:14305038-14305514 FORWARD	551.043	6371.16	11.562	0.0864902
Brapa_ESTC013471	AT3G55800	Symbols: SBPASE | SBPASE (sedoheptulose-bisphosphatase); phosphoric ester hydrolase | chr3:20720619-20722400 FORWARD	760.466	8788.55	11.5568	0.0865292
Brapa_ESTC021973	AT1G48100	Symbols: | glycoside hydrolase family 28 protein / polygalacturonase (pectinase) family protein | chr1:17770590-17773294 FORWARD	607.25	7005.19	11.5359	0.0866857
Brapa_ESTC002380	AT1G72610	Symbols: GLP1 | GLP1 (GERMIN-LIKE PROTEIN 1); manganese ion binding / metal ion binding / nutrient reservoir | chr1:27342964-27343590 REVERSE	105.024	1203.54	11.4597	0.0872626
Brapa_ESTC011111	AT1G30380	Symbols: PSAK | PSAK (PHOTOSYSTEM I SUBUNIT K) | chr1:10722307-10722995 FORWARD	3168.32	36053.5	11.3794	0.0878783
Brapa_ESTC020718	AT1G25460	Symbols: | oxidoreductase family protein | chr1:8942798-8944231 FORWARD	230.292	2610.36	11.335	0.0882223
Brapa_ESTC007605	AT2G06850	Symbols: EXT, EXGT-A1 | EXGT-A1 (ENDO-XYLOGLUCAN TRANSFERASE); hydrolase, acting on glycosyl bonds | chr2:2763616-2765487 FORWARD	2656.85	30080.2	11.3218	0.0883255
Brapa_ESTC003424	AT5G49540	Symbols: | similar to Protein of unknown function DUF786 [Medicago truncatula] (GB:ABE90870.1); contains InterPro domain Protein of unknown function DUF786; (InterPro:IPR008504) | chr5:20122030-20122835 REVERSE	560.174	6337.16	11.3128	0.0883951
Brapa_ESTC019580	AT1G60590	Symbols: | polygalacturonase, putative / pectinase, putative | chr1:22318091-22320532 REVERSE	393.012	4435.13	11.285	0.0886134
Brapa_ESTC029472	AT2G43560	Symbols: | immunophilin / FKBP-type peptidyl-prolyl cis-trans isomerase family protein | chr2:18081072-18082462 REVERSE	256.359	2885.4	11.2553	0.088847
Brapa_ESTC002295	AT1G56500	Symbols: | haloacid dehalogenase-like hydrolase family protein | chr1:21163440-21170757 FORWARD	421.914	4733.5	11.2191	0.0891336
Brapa_ESTC028627	AT1G60600	Symbols: ABC4 | ABC4 (ABERRANT CHLOROPLAST DEVELOPMENT 4); 1,4-dihydroxy-2-naphthoate octaprenyltransferase/ prenyltransferase | chr1:22328472-22330060 REVERSE	397.694	4451.12	11.1923	0.089347
Brapa_ESTC002912	AT5G44520	Symbols: | ribose 5-phosphate isomerase-related | chr5:17951837-17953668 REVERSE	401.879	4431.83	11.0278	0.0906801
Brapa_ESTC025617	AT2G21370	Symbols: | xylulose kinase, putative | chr2:9144662-9146653 REVERSE	263.656	2890.31	10.9624	0.0912207
Brapa_ESTC021067	no_hits_f	---------	349.506	3803.76	10.8832	0.0918843
Brapa_ESTC011599	AT1G22750	Symbols: | similar to Os06g0581300 [Oryza sativa (japonica cultivar-group)] (GB:NP_001057938.1); similar to unknown protein [Oryza sativa (japonica cultivar-group)] (GB:BAD68608.1); contains InterPro domain Protein of unknown function DUF1475; (InterPro:IPR009943) | chr1:8050900-8052607 FORWARD	680.61	7382.72	10.8472	0.0921896
Brapa_ESTC010604	AT5G40230	| Symbols: | nodulin-related | chr5:16097042-16098963 REVERSE	186.484	2022.44	10.8451	0.0922074
Brapa_ESTC005993	AT3G62410	| Symbols: CP12, CP12-2 | CP12-2 | chr3:23101982-23102377 FORWARD	1513.4	16399.3	10.8361	0.0922844
Brapa_ESTC006516	AT3G19800	Symbols: | similar to conserved hypothetical protein [Medicago truncatula] (GB:ABE78177.1) | chr3:6876159-6877477 FORWARD	458.197	4961.34	10.828	0.0923535
Brapa_ESTC040067	AT1G26760	Symbols: | SET domain-containing protein | chr1:9248291-9251590 REVERSE	310.238	3357.64	10.8228	0.0923976
Brapa_ESTC049306	no_hits_f	---------	2642.23	28586.9	10.8192	0.092428
Brapa_ESTC022870	AT2G12480	Symbols: SCPL43 | SCPL43; serine carboxypeptidase | chr2:5076877-5079309 REVERSE	524.754	5648.94	10.7649	0.0928942
Brapa_ESTC043995	AT3G61700	Symbols: | similar to unknown protein [Arabidopsis thaliana] (TAIR:AT2G46420.1); similar to uncharacterized plant-specific domain TIGR01589 family protein [Solanum demissum] (GB:AAU93592.2); contains InterPro domain Conserved hypothetical protein 1589, plant; (InterPro:IPR006476) | chr3:22847389-22849778 FORWARD	506.613	5425.45	10.7093	0.0933771
Brapa_ESTC051519	no_hits_f	---------	326.534	3494.12	10.7006	0.0934524
Brapa_ESTC008682	AT1G51110	Symbols: | plastid-lipid associated protein PAP / fibrillin family protein | chr1:18939048-18941152 FORWARD	2961.93	31640.3	10.6823	0.0936126
Brapa_ESTC011689	AT5G65940	Symbols: CHY1 | CHY1 (BETA-HYDROXYISOBUTYRYL-COA HYDROLASE 1) | chr5:26394153-26396387 REVERSE	514.525	5474.46	10.6398	0.0939864
Brapa_ESTC019040	no_hits_f	---------	153.333	1623.05	10.5851	0.0944721
Brapa_ESTC013009	AT1G20020	Symbols: ATLFNR2 | ATLFNR2 (LEAF FNR 2) | chr1:6942842-6944859 FORWARD	1963.2	20751.4	10.5702	0.0946057
Brapa_ESTC005513	AT3G26060	Symbols: ATPRX Q | peroxiredoxin Q, putative | chr3:9526044-9527360 FORWARD	572.421	6042.68	10.5564	0.0947297
Brapa_ESTC030224	AT4G29060	Symbols: EMB2726 | EMB2726 (EMBRYO DEFECTIVE 2726); translation elongation factor | chr4:14317750-14321321 FORWARD	963.707	10102.8	10.4833	0.0953901
Brapa_ESTC049122	AT1G76955	| Symbols: | unknown protein | chr1:28924066-28924430 REVERSE	1159.98	12067.6	10.4033	0.0961235
Brapa_ESTC038936	AT5G59350	Symbols: | similar to unknown protein [Arabidopsis thaliana] (TAIR:AT2G39560.1); similar to hypothetical protein MtrDRAFT_AC146757g30v1 [Medicago truncatula] (GB:ABE90639.1) | chr5:23958358-23959221 FORWARD	721.138	7467.73	10.3555	0.0965672
Brapa_ESTC037378	AT2G19800	Symbols: MIOX2 | MIOX2 (MYO-INOSITOL OXYGENASE 2) | chr2:8538188-8540436 REVERSE	543.077	5618.53	10.3457	0.0966582
Brapa_ESTC011549	no_hits_f	---------	940.561	9730.04	10.3449	0.0966657
Brapa_ESTC000309	AT5G02710	Symbols: | similar to Uncharacterised protein family containing protein, expressed [Oryza sativa (japonica cultivar-group)] (GB:ABF96102.1); similar to Os03g0363400 [Oryza sativa (japonica cultivar-group)] (GB:NP_001050164.1); contains InterPro domain Protein of unknown function UPF0153; (InterPro:IPR005358) | chr5:612626-613478 FORWARD	739.579	7635.41	10.324	0.0968617
Brapa_ESTC001620	no_hits_f	---------	764.227	7808.11	10.217	0.0978761
Brapa_ESTC015835	AT5G39020	Symbols: | protein kinase family protein | chr5:15634147-15636588 FORWARD	208.044	2114.38	10.1631	0.0983948
Brapa_ESTC035076	AT3G57700	Symbols: | protein kinase, putative | chr3:21395894-21396916 FORWARD	212.949	2163.29	10.1587	0.0984376
Brapa_ESTC022711	AT4G38860	Symbols: | auxin-responsive protein, putative | chr4:18130351-18130668 FORWARD	263.194	2668.99	10.1408	0.0986118
Brapa_ESTC029060	AT1G51110	Symbols: | plastid-lipid associated protein PAP / fibrillin family protein | chr1:18939048-18941152 FORWARD	719.903	7295.49	10.134	0.0986778
Brapa_ESTC047867	AT5G45670	Symbols: | GDSL-motif lipase/hydrolase family protein | chr5:18545827-18547391 FORWARD	420.942	4260.81	10.1221	0.0987939
Brapa_ESTC048495	no_hits_f	---------	547.138	5528.91	10.1051	0.0989595
Brapa_ESTC035281	AT5G12130	Symbols: PDE149 | PDE149 (PIGMENT DEFECTIVE 149) | chr5:3919614-3922155 FORWARD	927.047	9354.53	10.0907	0.0991014
Brapa_ESTC039006	no_hits_f	---------	1156.05	11616.9	10.0488	0.0995145
Brapa_ESTC035450	no_hits_f	---------	1166.84	11675.8	10.0063	0.0999366
Brapa_ESTC004757	AT3G44450	Symbols: | similar to unknown protein [Arabidopsis thaliana] (TAIR:AT3G52740.1); similar to H0717B12.8 [Oryza sativa (indica cultivar-group)] (GB:CAH67161.1) | chr3:16085215-16085565 REVERSE	372.2	3722.68	10.0018	0.0999817
Brapa_ESTC008351	AT1G07180	Symbols: ATNDI1, NDA1 | NDA1 (ALTERNATIVE NAD(P)H DEHYDROGENASE 1); NADH dehydrogenase | chr1:2204413-2206772 FORWARD	292.563	2910.42	9.94801	0.100523
Brapa_ESTC010208	AT4G17050	| Symbols: | transcription factor | chr4:9589681-9592432 FORWARD	254.534	2531.65	9.94622	0.100541
Brapa_ESTC042137	AT2G46970	Symbols: PIL1 | PIL1 (PHYTOCHROME INTERACTING FACTOR 3-LIKE 1); transcription factor | chr2:19302686-19304747 REVERSE	724.889	7196.86	9.92822	0.100723
Brapa_ESTC022972	AT3G56290	Symbols: | similar to Os01g0823600 [Oryza sativa (japonica cultivar-group)] (GB:NP_001044661.1); similar to unnamed protein product [Ostreococcus tauri] (GB:CAL58546.1) | chr3:20889722-20890520 REVERSE	592.731	5867.49	9.89908	0.10102
Brapa_ESTC001217	AT4G38960	Symbols: | zinc finger (B-box type) family protein | chr4:18161570-18163039 FORWARD	1309.58	12957.3	9.89424	0.101069
Brapa_ESTC037622	AT1G08800	Symbols: | similar to unknown protein [Arabidopsis thaliana] (TAIR:AT2G30690.1); similar to Os10g0414800 [Oryza sativa (japonica cultivar-group)] (GB:NP_001064597.1); similar to Os01g0775200 [Oryza sativa (japonica cultivar-group)] (GB:NP_001044407.1); similar to Hypothetical protein [Oryza sativa (japonica cultivar-group)] (GB:AAM15784.1); contains InterPro domain Protein of unknown function DUF…	372.028	3674.8	9.87775	0.101238
Brapa_ESTC047607	AT1G20020	Symbols: ATLFNR2 | ATLFNR2 (LEAF FNR 2) | chr1:6942842-6944859 FORWARD	4619.73	45456.7	9.83969	0.101629
Brapa_ESTC047264	AT5G54270	Symbols: LHCB3*1, LHCB3 | LHCB3 (LIGHT-HARVESTING CHLOROPHYLL BINDING PROTEIN 3) | chr5:22055650-22056609 FORWARD	1398.27	13725.9	9.81634	0.101871
Brapa_ESTC049076	AT1G27910	Symbols: | U-box domain-containing protein | chr1:9720949-9723962 REVERSE	605.845	5940.48	9.80528	0.101986
Brapa_ESTC008516	AT2G37660	Symbols: | catalytic/ coenzyme binding | chr2:15802559-15804055 REVERSE	1992.33	19432.5	9.75366	0.102526
Brapa_ESTC033067	AT4G10300	Symbols: | similar to unknown protein [Arabidopsis thaliana] (TAIR:AT3G04300.1); similar to Os04g0445200 [Oryza sativa (japonica cultivar-group)] (GB:NP_001052900.1); similar to Cupin, RmlC-type [Medicago truncatula] (GB:ABE82642.1); similar to OSIGBa0140O07.4 [Oryza sativa (indica cultivar-group)] (GB:CAH67236.1); contains InterPro domain Protein of unknown function DUF861, cupin_3; (InterPro:IP…	1862.77	18149.7	9.74339	0.102634
Brapa_ESTC000100	AT4G35760	Symbols: | electron carrier/ protein disulfide oxidoreductase | chr4:16942738-16944627 REVERSE	705.615	6865.7	9.73009	0.102774
Brapa_ESTC007846	AT2G04039	Symbols: | similar to unknown protein [Oryza sativa (japonica cultivar-group)] (GB:BAC84849.1) | chr2:1333461-1334435 FORWARD	414.358	4023.33	9.70979	0.102989
Brapa_ESTC020090	AT1G52000	Symbols: | jacalin lectin family protein | chr1:19337021-19339369 REVERSE	2357.84	22858	9.69447	0.103152
Brapa_ESTC022130	AT2G28305	Symbols: | similar to unknown protein [Arabidopsis thaliana] (TAIR:AT2G37210.1); similar to Conserved hypothetical protein 730 [Medicago truncatula] (GB:ABE89044.1); contains InterPro domain Conserved hypothetical protein 730; (InterPro:IPR005269) | chr2:12088263-12091384 FORWARD	2286.41	22164.7	9.69411	0.103155
Brapa_ESTC036105	AT3G10610	Symbols: | 40S ribosomal protein S17 (RPS17C) | chr3:3319464-3319886 FORWARD	2322.03	22425.4	9.65767	0.103545
Brapa_ESTC009417	AT1G55370	Symbols: | similar to unknown protein [Arabidopsis thaliana] (TAIR:AT1G64770.1); similar to Os03g0748300 [Oryza sativa (japonica cultivar-group)] (GB:NP_001051267.1); similar to Os03g0158300 [Oryza sativa (japonica cultivar-group)] (GB:NP_001049021.1); similar to Hypothetical protein [Oryza sativa (japonica cultivar-group)] (GB:AAN06836.1); contains InterPro domain Galactose mutarotase-like; (Int…	406.732	3927.58	9.65643	0.103558
Brapa_ESTC010441	AT1G19150	Symbols: LHCA2*1, LHCA6 | LHCA6 (Photosystem I light harvesting complex gene 6); chlorophyll binding | chr1:6612797-6613790 FORWARD	262.268	2532.05	9.65444	0.103579
Brapa_ESTC048443	no_hits_f	---------	198.81	1917.68	9.64579	0.103672
Brapa_ESTC008431	AT5G27400	Symbols: | similar to unknown protein [Arabidopsis thaliana] (TAIR:AT1G73320.1); similar to hypothetical protein MtrDRAFT_AC150244g5v1 [Medicago truncatula] (GB:ABD32378.1); similar to Os05g0143200 [Oryza sativa (japonica cultivar-group)] (GB:NP_001054614.1); contains domain no description (G3D.3.40.50.150); contains domain S-adenosyl-L-methionine-dependent methyltransferases (SSF53335); contains…	164.081	1580.23	9.63079	0.103834
Brapa_ESTC020544	AT3G09050	Symbols: | similar to Os01g0853000 [Oryza sativa (japonica cultivar-group)] (GB:NP_001044830.1) | chr3:2764865-2765912 FORWARD	789.767	7555.71	9.56701	0.104526
Brapa_ESTC038801	AT5G44520	Symbols: | ribose 5-phosphate isomerase-related | chr5:17951837-17953668 REVERSE	954.971	9125.06	9.55533	0.104654
Brapa_ESTC019670	AT3G62110	Symbols: | glycoside hydrolase family 28 protein / polygalacturonase (pectinase) family protein | chr3:23008288-23010478 REVERSE	538.472	5133.19	9.53288	0.1049
Brapa_ESTC020645	AT1G14150	Symbols: | oxygen evolving enhancer 3 (PsbQ) family protein | chr1:4839882-4840629 FORWARD	188.833	1798.4	9.52376	0.105001
Brapa_ESTC045516	AT5G09820	| Symbols: | structural molecule | chr5:3056091-3057381 REVERSE	569.216	5411.61	9.50713	0.105184
Brapa_ESTC020267	AT5G27390	Symbols: | similar to Os05g0401300 [Oryza sativa (japonica cultivar-group)] (GB:NP_001055488.1) | chr5:9674637-9676121 REVERSE	593.806	5637.71	9.4942	0.105328
Brapa_ESTC010211	AT1G20610	Symbols: CYCB2;3 | CYCB2;3 (CYCLIN B2;3); cyclin-dependent protein kinase regulator | chr1:7135063-7137263 REVERSE	267.171	2529.1	9.46622	0.105639
Brapa_ESTC004869	no_hits_f	---------	385.082	3618.2	9.39592	0.106429
Brapa_ESTC011710	AT2G37660	Symbols: | catalytic/ coenzyme binding | chr2:15802559-15804055 REVERSE	2696.76	25292.2	9.37874	0.106624
Brapa_ESTC035677	AT4G21445	Symbols: | similar to Os04g0635700 [Oryza sativa (japonica cultivar-group)] (GB:NP_001054010.1); similar to H0410G08.9 [Oryza sativa (indica cultivar-group)] (GB:CAH67654.1) | chr4:11424792-11425601 FORWARD	958.69	8984.22	9.37135	0.106708
Brapa_ESTC038853	no_hits_f	---------	175.341	1641.76	9.36324	0.106801
Brapa_ESTC034674	AT5G57840	Symbols: | transferase family protein | chr5:23450171-23452387 REVERSE	185.522	1735.53	9.35485	0.106896
Brapa_ESTC000135	AT5G54270	Symbols: LHCB3*1, LHCB3 | LHCB3 (LIGHT-HARVESTING CHLOROPHYLL BINDING PROTEIN 3) | chr5:22055650-22056609 FORWARD	2251.12	20963.8	9.31261	0.107381
Brapa_ESTC021154	AT3G03710	Symbols: RIF10 | RIF10 (RESISTANT TO INHIBITION WITH FSM 10); 3'-5'-exoribonuclease/ RNA binding / nucleic acid binding | chr3:919549-924913 FORWARD	165.96	1541.68	9.28947	0.107649
Brapa_ESTC048214	no_hits_f	---------	181.102	1678.51	9.26831	0.107895
Brapa_ESTC014001	AT1G30380	Symbols: PSAK | PSAK (PHOTOSYSTEM I SUBUNIT K) | chr1:10722307-10722995 FORWARD	4325.29	39944.4	9.23508	0.108283
Brapa_ESTC010840	AT1G72610	Symbols: GLP1 | GLP1 (GERMIN-LIKE PROTEIN 1); manganese ion binding / metal ion binding / nutrient reservoir | chr1:27342964-27343590 REVERSE	325.173	3000.19	9.22644	0.108384
Brapa_ESTC016070	AT3G62110	Symbols: | glycoside hydrolase family 28 protein / polygalacturonase (pectinase) family protein | chr3:23008288-23010478 REVERSE	801.944	7392.28	9.21795	0.108484
Brapa_ESTC045842	AT5G20630	Symbols: GLP3A, GLP3B, GLP3 | GLP3 (GERMIN-LIKE PROTEIN 3); manganese ion binding / metal ion binding / nutrient reservoir | chr5:6975317-6975952 REVERSE	1494.57	13717.5	9.17823	0.108954
Brapa_ESTC039870	AT4G39140	Symbols: | protein binding / zinc ion binding | chr4:18229631-18231276 REVERSE	428.304	3926.9	9.16849	0.109069
Brapa_ESTC001680	AT5G10480	Symbols: PEP, PAS2 | PAS2 (PASTICCINO 2) | chr5:3298048-3300049 REVERSE	272.509	2498.17	9.16729	0.109083
Brapa_ESTC031469	no_hits_f	---------	2336.18	21324.6	9.12798	0.109553
Brapa_ESTC040404	AT1G69160	Symbols: | similar to unknown protein [Arabidopsis thaliana] (TAIR:AT3G13980.1) | chr1:26003978-26004943 FORWARD	413.221	3762.74	9.10588	0.109819
Brapa_ESTC045969	AT5G41050	Symbols: | similar to unknown protein [Arabidopsis thaliana] (TAIR:AT3G26960.1); similar to Os09g0508200 [Oryza sativa (japonica cultivar-group)] (GB:NP_001063620.1); similar to Os12g0472800 [Oryza sativa (japonica cultivar-group)] (GB:NP_001066754.1) | chr5:16450706-16451304 REVERSE	1526.47	13861	9.08043	0.110127
Brapa_ESTC049327	no_hits_f	---------	632.563	5737.08	9.06958	0.110259
Brapa_ESTC025665	AT5G02760	Symbols: | protein phosphatase 2C family protein / PP2C family protein | chr5:625375-626815 FORWARD	245.852	2225.45	9.05199	0.110473
Brapa_ESTC028542	no_hits_f	---------	249.84	2257.63	9.0363	0.110665
Brapa_ESTC022332	AT4G36530	Symbols: | hydrolase, alpha/beta fold family protein | chr4:17240123-17241773 REVERSE	619.332	5594.67	9.03339	0.1107
Brapa_ESTC026526	AT5G39210	Symbols: CRR7 | CRR7 (CHLORORESPIRATORY REDUCTION 7) | chr5:15720459-15721227 FORWARD	755.695	6813.42	9.0161	0.110913
Brapa_ESTC005612	AT5G43745	Symbols: | phosphotransferase-related | chr5:17586662-17592181 REVERSE	112.158	1009	8.99624	0.111158
Brapa_ESTC019577	AT2G40100	Symbols: LHCB4.3 | LHCB4.3 (LIGHT HARVESTING COMPLEX PSII); chlorophyll binding | chr2:16752962-16754268 FORWARD	2008.1	18043.9	8.98556	0.11129
Brapa_ESTC030874	AT4G02530	Symbols: | chloroplast thylakoid lumen protein | chr4:1112335-1114005 REVERSE	925.876	8316.05	8.98182	0.111336
Brapa_ESTC011402	AT1G73650	Symbols: | similar to unknown protein [Arabidopsis thaliana] (TAIR:AT1G18180.1); similar to hypothetical protein MtrDRAFT_AC139526g26v1 [Medicago truncatula] (GB:ABE80157.1); contains InterPro domain Protein of unknown function DUF1295; (InterPro:IPR010721); contains InterPro domain 3-oxo-5-alpha-steroid 4-dehydrogenase, C-terminal; (InterPro:IPR001104) | chr1:27692070-27693826 REVERSE	853.843	7655.52	8.96596	0.111533
Brapa_ESTC011050	AT5G09660	Symbols: PMDH2 | PMDH2 (PEROXISOMAL NAD-MALATE DEHYDROGENASE 2); malate dehydrogenase | chr5:2993646-2995552 REVERSE	425.944	3816.75	8.96068	0.111599
Brapa_ESTC041458	AT2G32500	Symbols: | similar to unknown protein [Arabidopsis thaliana] (TAIR:AT2G31670.1); similar to Os03g0110900 [Oryza sativa (japonica cultivar-group)] (GB:NP_001048719.1); contains InterPro domain Stress responsive alpha-beta barrel; (InterPro:IPR013097) | chr2:13802448-13804197 REVERSE	487.215	4363.36	8.95572	0.111661
Brapa_ESTC042417	AT3G01550	Symbols: | triose phosphate/phosphate translocator, putative | chr3:216954-218863 REVERSE	384.008	3431.79	8.93677	0.111897
Brapa_ESTC020517	AT5G54270	Symbols: LHCB3*1, LHCB3 | LHCB3 (LIGHT-HARVESTING CHLOROPHYLL BINDING PROTEIN 3) | chr5:22055650-22056609 FORWARD	1114.05	9942.36	8.92452	0.112051
Brapa_ESTC002543	AT1G55480	Symbols: | binding / protein binding | chr1:20717488-20719017 FORWARD	120.858	1077.92	8.9189	0.112121
Brapa_ESTC008438	AT2G23000	Symbols: SCPL10 | SCPL10 (serine carboxypeptidase-like 10); serine carboxypeptidase | chr2:9799364-9802821 FORWARD	167.133	1481.62	8.86492	0.112804
Brapa_ESTC002819	AT4G02530	Symbols: | chloroplast thylakoid lumen protein | chr4:1112335-1114005 REVERSE	647.048	5726.43	8.85009	0.112993
Brapa_ESTC022271	AT5G04620	Symbols: ATBIOF | ATBIOF; transaminase | chr5:1328005-1329935 FORWARD	811.07	7174.16	8.8453	0.113054
Brapa_ESTC047904	no_hits_f	---------	1295.07	11429.9	8.8257	0.113305
Brapa_ESTC003854	AT3G11945	| Symbols: | prenyltransferase | chr3:3780047-3782886 REVERSE	325.146	2864.34	8.8094	0.113515
Brapa_ESTC050979	no_hits_f	---------	178.762	1573.56	8.80254	0.113604
Brapa_ESTC012019	AT3G62060	Symbols: | pectinacetylesterase family protein | chr3:22991098-22993709 FORWARD	973.426	8550.45	8.78387	0.113845
Brapa_ESTC019639	AT1G48100	Symbols: | glycoside hydrolase family 28 protein / polygalacturonase (pectinase) family protein | chr1:17770590-17773294 FORWARD	1252.14	10987.2	8.77474	0.113964
Brapa_ESTC048856	no_hits_f	---------	757.436	6639.94	8.76634	0.114073
Brapa_ESTC002600	AT2G46820	Symbols: PTAC8, TMP14, PSAP, PSI-P | TMP14 (THYLAKOID MEMBRANE PHOSPHOPROTEIN OF 14 KDA) | chr2:19250798-19251939 FORWARD	822.375	7191.08	8.74428	0.11436
Brapa_ESTC036400	AT4G30180	Symbols: | transcription factor/ transcription regulator | chr4:14769034-14769510 FORWARD	1708.4	14868.2	8.703	0.114903
Brapa_ESTC045700	AT5G14910	Symbols: | heavy-metal-associated domain-containing protein | chr5:4823818-4825199 FORWARD	1210.67	10493.6	8.6676	0.115372
Brapa_ESTC020483	AT2G43560	Symbols: | immunophilin / FKBP-type peptidyl-prolyl cis-trans isomerase family protein | chr2:18081072-18082462 REVERSE	1739.25	15073.2	8.66649	0.115387
Brapa_ESTC017490	AT5G26780	Symbols: SHM2 | SHM2 (SERINE HYDROXYMETHYLTRANSFERASE 2); glycine hydroxymethyltransferase | chr5:9418302-9421728 FORWARD	466.843	4033.52	8.63999	0.115741
Brapa_ESTC011944	AT2G21385	Symbols: | similar to Os09g0531100 [Oryza sativa (japonica cultivar-group)] (GB:NP_001063753.1); similar to conserved hypothetical protein [Medicago truncatula] (GB:ABE89529.1) | chr2:9156806-9158832 FORWARD	610.415	5272.44	8.63747	0.115775
Brapa_ESTC035586	AT3G24450	Symbols: | copper-binding family protein | chr3:8880293-8881618 REVERSE	421.017	3613.44	8.58265	0.116514
Brapa_ESTC041180	AT2G21220	Symbols: | auxin-responsive protein, putative | chr2:9096461-9096775 FORWARD	344.274	2947.94	8.56277	0.116785
Brapa_ESTC014004	AT2G28305	Symbols: | similar to unknown protein [Arabidopsis thaliana] (TAIR:AT2G37210.1); similar to Conserved hypothetical protein 730 [Medicago truncatula] (GB:ABE89044.1); contains InterPro domain Conserved hypothetical protein 730; (InterPro:IPR005269) | chr2:12088263-12091384 FORWARD	3178.2	27178.4	8.55151	0.116938
Brapa_ESTC023425	AT2G37660	Symbols: | catalytic/ coenzyme binding | chr2:15802559-15804055 REVERSE	1578.77	13500.6	8.55134	0.116941
Brapa_ESTC025631	AT5G20790	Symbols: | similar to unknown protein [Arabidopsis thaliana] (TAIR:AT3G43110.1); similar to conserved hypothetical protein [Medicago truncatula] (GB:ABE90972.1) | chr5:7040048-7040629 REVERSE	1388.18	11848.3	8.53513	0.117163
Brapa_ESTC036260	AT3G26580	| Symbols: | binding | chr3:9760170-9761586 FORWARD	786.957	6697.11	8.51013	0.117507
Brapa_ESTC040882	AT1G50520	Symbols: CYP705A27 | CYP705A27 (cytochrome P450, family 705, subfamily A, polypeptide 27); oxygen binding | chr1:18723049-18724738 FORWARD	624.909	5306.95	8.49236	0.117753
Brapa_ESTC011295	AT5G04380	Symbols: | S-adenosyl-L-methionine:carboxyl methyltransferase family protein | chr5:1234884-1236318 FORWARD	207.087	1756.44	8.48165	0.117902
Brapa_ESTC002706	AT5G08050	Symbols: | similar to unknown protein [Arabidopsis thaliana] (TAIR:AT1G74730.1); similar to Os12g0575000 [Oryza sativa (japonica cultivar-group)] (GB:NP_001067105.1); similar to hypothetical protein LOC_Os11g27300 [Oryza sativa (japonica cultivar-group)] (GB:ABA93451.1); contains InterPro domain Protein of unknown function DUF1118; (InterPro:IPR009500) | chr5:2578419-2578965 FORWARD	1298.25	10981.5	8.45869	0.118222
Brapa_ESTC045075	AT4G36530	Symbols: | hydrolase, alpha/beta fold family protein | chr4:17240123-17241773 REVERSE	474.795	4013.23	8.45255	0.118307
Brapa_ESTC004927	AT2G43340	Symbols: | similar to unknown protein [Arabidopsis thaliana] (TAIR:AT2G31560.2); similar to hypothetical protein [Oryza sativa (japonica cultivar-group)] (GB:BAB86085.1); similar to Os11g0282300 [Oryza sativa (japonica cultivar-group)] (GB:NP_001067693.1); similar to Os12g0230600 [Oryza sativa (japonica cultivar-group)] (GB:NP_001066444.1); contains InterPro domain Protein of unknown function DUF…	246.799	2083.88	8.44363	0.118432
Brapa_ESTC041201	AT2G21370	Symbols: | xylulose kinase, putative | chr2:9144662-9146653 REVERSE	1194.86	10082.5	8.43823	0.118508
Brapa_ESTC046050	AT5G45780	Symbols: | leucine-rich repeat transmembrane protein kinase, putative | chr5:18584173-18586852 REVERSE	159.843	1346.94	8.42664	0.118671
Brapa_ESTC012890	AT2G12480	Symbols: SCPL43 | SCPL43; serine carboxypeptidase | chr2:5076877-5079309 REVERSE	643.304	5410.73	8.41084	0.118894
Brapa_ESTC050799	no_hits_f	---------	795.026	6675.4	8.39645	0.119098
Brapa_ESTC001731	AT5G67370	Symbols: | similar to unknown protein [Arabidopsis thaliana] (TAIR:AT5G11840.1); similar to Protein of unknown function DUF1230 [Medicago truncatula] (GB:ABE85761.1); contains InterPro domain Protein of unknown function DUF1230; (InterPro:IPR009631) | chr5:26894893-26896691 REVERSE	193.713	1625.24	8.38994	0.11919
Brapa_ESTC049860	no_hits_f	---------	429.187	3594.84	8.37593	0.11939
Brapa_ESTC007337	AT5G17170	Symbols: | rubredoxin family protein | chr5:5649337-5650977 FORWARD	2595.86	21670.1	8.34795	0.11979
Brapa_ESTC006101	AT3G15115	Symbols: | similar to unknown protein [Arabidopsis thaliana] (TAIR:AT1G53180.1) | chr3:5086226-5087359 REVERSE	359.451	2993.8	8.32881	0.120065
Brapa_ESTC051588	no_hits_f	---------	210.709	1752.21	8.31578	0.120253
Brapa_ESTC005262	AT2G46330	Symbols: ATAGP16, AGP16 | AGP16 (ARABINOGALACTAN PROTEIN 16) | chr2:19025803-19026181 REVERSE	283.292	2352.23	8.3032	0.120436
Brapa_ESTC015198	AT5G27470	Symbols: | seryl-tRNA synthetase / serine--tRNA ligase | chr5:9695090-9697157 FORWARD	292.418	2423.84	8.28896	0.120642
Brapa_ESTC047188	AT2G19800	Symbols: MIOX2 | MIOX2 (MYO-INOSITOL OXYGENASE 2) | chr2:8538188-8540436 REVERSE	332.47	2753.08	8.28069	0.120763
Brapa_ESTC026187	AT5G61130	Symbols: | glycosyl hydrolase family protein 17 | chr5:24604664-24606595 REVERSE	552.145	4557.4	8.25399	0.121154
Brapa_ESTC009745	AT1G55910	Symbols: ZIP11 | ZIP11 (ZINC TRANSPORTER 11 PRECURSOR); cation transporter | chr1:20909826-20910890 FORWARD	841.363	6934.75	8.24228	0.121326
Brapa_ESTC034261	no_hits_f	---------	199.945	1640.66	8.20556	0.121869
Brapa_ESTC030466	AT3G58430	Symbols: | similar to meprin and TRAF homology domain-containing protein / MATH domain-containing protein [Arabidopsis thaliana] (TAIR:AT3G58410.1); similar to MATH domain containing protein [Brassica oleracea] (GB:ABD65138.1); contains InterPro domain TRAF-like; (InterPro:IPR008974); contains InterPro domain MATH; (InterPro:IPR002083); contains InterPro domain TRAF-type; (InterPro:IPR013322) | c…	210.541	1726.39	8.19978	0.121954
Brapa_ESTC051587	no_hits_f	---------	317.658	2600.05	8.18506	0.122174
Brapa_ESTC029096	AT1G61520	Symbols: LHCA3 | LHCA3 (Photosystem I light harvesting complex gene 3) | chr1:22704158-22704814 FORWARD	4443.71	36286.2	8.16574	0.122463
Brapa_ESTC026265	AT5G12130	Symbols: PDE149 | PDE149 (PIGMENT DEFECTIVE 149) | chr5:3919614-3922155 FORWARD	681.101	5558.64	8.16126	0.12253
Brapa_ESTC010708	AT5G61060	Symbols: HDA5, HDA05 | HDA05 (HISTONE DEACETYLASE5); histone deacetylase | chr5:24584363-24588143 REVERSE	1033.77	8433.78	8.15828	0.122575
Brapa_ESTC029165	AT3G62030	Symbols: ROC4 | ROC4 (rotamase CyP 4); peptidyl-prolyl cis-trans isomerase | chr3:22984683-22986114 FORWARD	2548.97	20668.7	8.10865	0.123325
Brapa_ESTC009126	AT2G30570	Symbols: PSBW | photosystem II reaction center W (PsbW) protein-related | chr2:13026403-13027130 REVERSE	440.028	3567.73	8.10796	0.123336
Brapa_ESTC016208	AT5G42760	Symbols: | similar to hypothetical protein [Oryza sativa (japonica cultivar-group)] (GB:AAN65019.1); contains InterPro domain O-methyltransferase, N-terminal; (InterPro:IPR003455); contains InterPro domain Protein of unknown function Mtu_121; (InterPro:IPR011610) | chr5:17166181-17167333 FORWARD	183.453	1484.57	8.09237	0.123573
Brapa_ESTC038406	AT4G17360	Symbols: | formyltetrahydrofolate deformylase, putative | chr4:9703710-9705480 REVERSE	456.417	3689.78	8.08423	0.123698
Brapa_ESTC025525	AT4G15030	Symbols: | similar to unknown protein [Arabidopsis thaliana] (TAIR:AT1G56660.1); similar to Phyb1 [Pimpinella brachycarpa] (GB:AAC31614.1); contains domain ACID PHOSPHATASE-RELATED (PTHR11567); contains domain UNCHARACTERIZED (PTHR11567:SF1) | chr4:8579543-8581175 FORWARD	214.331	1726.11	8.05348	0.12417
Brapa_ESTC049211	AT4G29060	Symbols: EMB2726 | EMB2726 (EMBRYO DEFECTIVE 2726); translation elongation factor | chr4:14317750-14321321 FORWARD	1698.29	13659.1	8.04285	0.124334
Brapa_ESTC020742	AT5G22920	Symbols: | zinc finger (C3HC4-type RING finger) family protein | chr5:7665146-7667034 FORWARD	397.834	3195.46	8.03214	0.1245
Brapa_ESTC002993	AT3G06880	Symbols: | transducin family protein / WD-40 repeat family protein | chr3:2169862-2175692 REVERSE	227.62	1824.35	8.01489	0.124768
Brapa_ESTC050039	no_hits_f	---------	404.103	3237.16	8.01073	0.124833
Brapa_ESTC011795	no_hits_f	---------	129.785	1038.62	8.00262	0.124959
Brapa_ESTC007053	AT1G16880	Symbols: | uridylyltransferase-related | chr1:5773789-5776118 FORWARD	1607.8	12845.5	7.98949	0.125164
Brapa_ESTC017763	AT2G42960	Symbols: | protein kinase family protein | chr2:17875674-17877707 REVERSE	1107.81	8845.17	7.98437	0.125245
Brapa_ESTC010051	AT1G78995	Symbols: | similar to hypothetical protein [Oryza sativa (japonica cultivar-group)] (GB:BAD10530.1) | chr1:29720326-29720972 REVERSE	3285.37	26205.2	7.97633	0.125371
Brapa_ESTC014478	no_hits_f	---------	257.761	2044.11	7.93025	0.126099
Brapa_ESTC001062	AT2G40670	Symbols: RR16, ARR16 | ARR16 (response regulator 16); transcription regulator/ two-component response regulator | chr2:16977336-16978198 FORWARD	170.86	1354.8	7.9293	0.126115
Brapa_ESTC009264	AT4G25780	Symbols: | pathogenesis-related protein, putative | chr4:13121116-13121688 FORWARD	532.201	4205.8	7.90265	0.12654
Brapa_ESTC025361	AT3G62060	Symbols: | pectinacetylesterase family protein | chr3:22991098-22993709 FORWARD	784.713	6168.5	7.86084	0.127213
Brapa_ESTC011971	AT1G53520	Symbols: | chalcone-flavanone isomerase-related | chr1:19980153-19981583 REVERSE	256.348	2005.59	7.8237	0.127817
Brapa_ESTC026535	AT3G63140	Symbols: | mRNA-binding protein, putative | chr3:23337981-23339595 REVERSE	683.512	5335.93	7.80664	0.128096
Brapa_ESTC008607	AT2G41790	Symbols: | peptidase M16 family protein / insulinase family protein | chr2:17436531-17443188 REVERSE	281.23	2185.14	7.76994	0.128701
Brapa_ESTC051185	AT4G31040	Symbols: | proton extrusion protein-related | chr4:15111817-15113887 REVERSE	266.497	2070.31	7.76861	0.128723
Brapa_ESTC049345	no_hits_f	---------	706.354	5484.83	7.76499	0.128783
Brapa_ESTC010762	AT5G05580	Symbols: SH1, FAD8 | FAD8 (FATTY ACID DESATURASE 8); omega-3 fatty acid desaturase | chr5:1664332-1666346 FORWARD	151.755	1177.44	7.75882	0.128886
Brapa_ESTC006336	AT4G15790	Symbols: | similar to expressed protein [Oryza sativa (japonica cultivar-group)] (GB:ABA99455.1); similar to Os12g0541400 [Oryza sativa (japonica cultivar-group)] (GB:NP_001066955.1); contains InterPro domain t-snare; (InterPro:IPR010989) | chr4:8982265-8984076 FORWARD	723.601	5598.84	7.73747	0.129241
Brapa_ESTC022678	AT3G56290	Symbols: | similar to Os01g0823600 [Oryza sativa (japonica cultivar-group)] (GB:NP_001044661.1); similar to unnamed protein product [Ostreococcus tauri] (GB:CAL58546.1) | chr3:20889722-20890520 REVERSE	213.504	1651.45	7.73498	0.129283
Brapa_ESTC008001	AT5G19220	Symbols: APL1, ADG2 | ADG2 (ADPG PYROPHOSPHORYLASE 2); glucose-1-phosphate adenylyltransferase | chr5:6463933-6466777 REVERSE	2125.96	16368.1	7.69916	0.129884
Brapa_ESTC001385	AT5G04080	Symbols: | similar to unknown protein [Oryza sativa (japonica cultivar-group)] (GB:BAD87214.1) | chr5:1104816-1105187 FORWARD	2537.37	19497.1	7.68398	0.130141
Brapa_ESTC000854	AT5G19855	Symbols: | similar to Os03g0807900 [Oryza sativa (japonica cultivar-group)] (GB:NP_001051646.1); similar to chaperonin-like RbcX [Trichodesmium erythraeum IMS101] (GB:YP_723870.1); similar to Os07g0569600 [Oryza sativa (japonica cultivar-group)] (GB:NP_001060039.1) | chr5:6712168-6713447 REVERSE	1647.41	12642.2	7.67399	0.13031
Brapa_ESTC021964	AT1G28110	Symbols: SCPL45 | SCPL45; serine carboxypeptidase | chr1:9804140-9806819 REVERSE	206.732	1585.57	7.66969	0.130383
Brapa_ESTC001697	AT3G60750	Symbols: | transketolase, putative | chr3:22464979-22467799 FORWARD	6209.44	47569.8	7.66088	0.130533
Brapa_ESTC001837	AT5G23060	Symbols: | similar to unknown protein [Arabidopsis thaliana] (TAIR:AT3G59780.1); similar to Rhodanese-like [Medicago truncatula] (GB:ABE85110.1); contains InterPro domain Rhodanese-like; (InterPro:IPR001763) | chr5:7736763-7738415 REVERSE	548.616	4198.78	7.6534	0.130661
Brapa_ESTC043772	AT3G55080	Symbols: | SET domain-containing protein | chr3:20422453-20425572 REVERSE	154.484	1181.13	7.64565	0.130793
Brapa_ESTC000173	AT4G29850	Symbols: | similar to unknown protein [Arabidopsis thaliana] (TAIR:AT2G19350.1); similar to unknown [Gymnadenia conopsea] (GB:ABD66514.1); contains InterPro domain Protein of unknown function DUF872, eukaryotic; (InterPro:IPR008590) | chr4:14601824-14602880 REVERSE	486.168	3701.66	7.61395	0.131338
Brapa_ESTC016611	AT1G53800	| Symbols: | endonuclease | chr1:20085556-20087988 FORWARD	2356.9	17934.5	7.60936	0.131417
Brapa_ESTC002692	AT5G48790	Symbols: | similar to unknown protein [Arabidopsis thaliana] (TAIR:AT1G73060.1); similar to hypothetical protein SBB1_14t00013 [Solanum bulbocastanum] (GB:AAP45177.2); similar to hypothetical protein SBB1_21t00009 [Solanum bulbocastanum] (GB:ABI34553.1) | chr5:19797236-19799203 REVERSE	545.416	4142.55	7.59521	0.131662
Brapa_ESTC036153	AT1G72640	Symbols: | similar to catalytic/ coenzyme binding [Arabidopsis thaliana] (TAIR:AT4G31530.1); similar to expressed protein [Oryza sativa (japonica cultivar-group)] (GB:AAR06314.1); contains InterPro domain von Willebrand factor, type A; (InterPro:IPR002035) | chr1:27350071-27351809 REVERSE	706.417	5360.19	7.58786	0.13179
Brapa_ESTC030668	AT5G14960	Symbols: DEL2, E2L1, E2FD | DEL2/E2FD/E2L1 (DP-E2F-LIKE 2); DNA binding / transcription factor | chr5:4843969-4846376 FORWARD	1429.33	10830.8	7.57754	0.131969
Brapa_ESTC019550	AT1G72610	Symbols: GLP1 | GLP1 (GERMIN-LIKE PROTEIN 1); manganese ion binding / metal ion binding / nutrient reservoir | chr1:27342964-27343590 REVERSE	1774.41	13413.5	7.55941	0.132285
Brapa_ESTC027424	AT1G29670	Symbols: | GDSL-motif lipase/hydrolase family protein | chr1:10375829-10377703 FORWARD	808.355	6106.59	7.55434	0.132374
Brapa_ESTC021057	AT2G24060	Symbols: | translation initiation factor 3 (IF-3) family protein | chr2:10236533-10238470 FORWARD	141.009	1065.21	7.5542	0.132377
Brapa_ESTC051750	no_hits_f	---------	347.321	2609.9	7.51437	0.133078
Brapa_ESTC001616	AT5G17170	Symbols: | rubredoxin family protein | chr5:5649337-5650977 FORWARD	2797.42	20945.9	7.48758	0.133555
Brapa_ESTC027559	AT1G32520	Symbols: | similar to Os11g0220300 [Oryza sativa (japonica cultivar-group)] (GB:NP_001067521.1); similar to hypothetical protein [Oryza sativa (japonica cultivar-group)] (GB:BAD61574.1) | chr1:11758402-11759252 REVERSE	583.42	4366.07	7.48358	0.133626
Brapa_ESTC018878	AT1G17610	Symbols: | disease resistance protein-related | chr1:6056888-6058150 FORWARD	868.117	6488.38	7.47408	0.133796
Brapa_ESTC011041	AT1G73110	Symbols: | ribulose bisphosphate carboxylase/oxygenase activase, putative / RuBisCO activase, putative | chr1:27498005-27500505 REVERSE	688.427	5142.08	7.46932	0.133881
Brapa_ESTC002732	AT4G08770	| Symbols: | peroxidase, putative | chr4:5598256-5600259 REVERSE	1723.99	12870.2	7.46536	0.133952
Brapa_ESTC010016	AT4G30720	| Symbols: | monooxygenase | chr4:14972218-14975467 REVERSE	723.543	5392.66	7.45313	0.134172
Brapa_ESTC010635	AT5G27390	Symbols: | similar to Os05g0401300 [Oryza sativa (japonica cultivar-group)] (GB:NP_001055488.1) | chr5:9674637-9676121 REVERSE	559.421	4164.82	7.44488	0.134321
Brapa_ESTC023875	AT1G17830	Symbols: | similar to unknown protein [Arabidopsis thaliana] (TAIR:AT1G73210.1); similar to hypothetical protein [Oryza sativa (japonica cultivar-group)] (GB:AAO39871.1); similar to Os10g0494000 [Oryza sativa (japonica cultivar-group)] (GB:NP_001064942.1); similar to hypothetical protein [Oryza sativa (japonica cultivar-group)] (GB:AAP46235.1); contains InterPro domain Protein of unknown function…	1635.99	12167.6	7.43745	0.134455
Brapa_ESTC042634	AT4G33690	Symbols: | similar to nucleic acid binding [Arabidopsis thaliana] (TAIR:AT3G23900.2); similar to Os07g0213400 [Oryza sativa (japonica cultivar-group)] (GB:NP_001059181.1); similar to unknown protein [Oryza sativa (japonica cultivar-group)] (GB:BAD05599.1) | chr4:16175201-16176140 FORWARD	517.06	3844.92	7.43612	0.134479
Brapa_ESTC004914	AT1G15100	Symbols: RHA2A | RHA2A (RING-H2 finger A2A); protein binding / zinc ion binding | chr1:5193698-5194165 REVERSE	194.166	1441.38	7.42344	0.134708
Brapa_ESTC024490	AT2G40750	Symbols: ATWRKY54, WRKY54 | WRKY54 (WRKY DNA-binding protein 54); transcription factor | chr2:17007714-17009432 REVERSE	702.532	5213.83	7.42148	0.134744
Brapa_ESTC004381	AT5G12240	Symbols: | similar to unknown protein [Oryza sativa (japonica cultivar-group)] (GB:BAC16476.1); similar to Os07g0641800 [Oryza sativa (japonica cultivar-group)] (GB:NP_001060432.1) | chr5:3959121-3960778 REVERSE	1053.75	7816.57	7.41786	0.13481
Brapa_ESTC040641	AT1G77870	Symbols: MUB5 | MUB5 (MEMBRANE-ANCHORED UBIQUITIN-FOLD PROTEIN 5 PRECURSOR) | chr1:29290071-29290608 FORWARD	147.291	1089.9	7.39964	0.135142
Brapa_ESTC000169	AT1G32470	Symbols: | glycine cleavage system H protein, mitochondrial, putative | chr1:11739459-11740226 REVERSE	1864.25	13786.1	7.39498	0.135227
Brapa_ESTC004286	AT2G06520	Symbols: PSBX | PSBX (photosystem II subunit X) | chr2:2587865-2588215 REVERSE	3176.62	23458.2	7.38464	0.135416
Brapa_ESTC025661	AT2G32920	Symbols: ATPDIL2-3 | ATPDIL2-3 (PDI-LIKE 2-3); protein disulfide isomerase | chr2:13969579-13972483 REVERSE	503.453	3706.76	7.36267	0.13582
Brapa_ESTC013960	AT1G32520	Symbols: | similar to Os11g0220300 [Oryza sativa (japonica cultivar-group)] (GB:NP_001067521.1); similar to hypothetical protein [Oryza sativa (japonica cultivar-group)] (GB:BAD61574.1) | chr1:11758402-11759252 REVERSE	312.213	2298.2	7.361	0.135851
Brapa_ESTC047869	no_hits_f	---------	143.217	1052.6	7.34969	0.13606
Brapa_ESTC013577	AT3G24430	Symbols: HCF101 | HCF101 (HIGH-CHLOROPHYLL-FLUORESCENCE 101); ATP binding | chr3:8868738-8872161 REVERSE	502.363	3692.01	7.34929	0.136068
Brapa_ESTC047255	no_hits_f	---------	343.727	2524.64	7.3449	0.136149
Brapa_ESTC016301	AT3G18080	Symbols: | glycosyl hydrolase family 1 protein | chr3:6191592-6194130 FORWARD	897.471	6587.55	7.34013	0.136237
Brapa_ESTC048725	no_hits_f	---------	783.224	5747.24	7.33793	0.136278
Brapa_ESTC007415	AT4G08770	| Symbols: | peroxidase, putative | chr4:5598256-5600259 REVERSE	1522.51	11163.3	7.33217	0.136385
Brapa_ESTC050137	AT3G01090	Symbols: SnRK1.1, AKIN10 | AKIN10 (Arabidopsis SNF1 kinase homolog 10, SNF1-RELATED PROTEIN KINASE 1.1); protein kinase | chr3:31444-34150 REVERSE	138.086	1012.19	7.33014	0.136423
Brapa_ESTC012812	AT1G09340	Symbols: | catalytic/ coenzyme binding | chr1:3015475-3018037 FORWARD	198.784	1453.67	7.31281	0.136746
Brapa_ESTC031056	AT1G32470	Symbols: | glycine cleavage system H protein, mitochondrial, putative | chr1:11739459-11740226 REVERSE	2205.51	16124.2	7.31087	0.136783
Brapa_ESTC049085	no_hits_f	---------	138.805	1013.23	7.29966	0.136993
Brapa_ESTC019551	AT2G17340	Symbols: | pantothenate kinase-related | chr2:7548697-7551171 REVERSE	1254.03	9153.13	7.29897	0.137006
Brapa_ESTC015431	AT1G14040	Symbols: | similar to EXS family protein / ERD1/XPR1/SYG1 family protein [Arabidopsis thaliana] (TAIR:AT2G03260.1); similar to EXS family protein / ERD1/XPR1/SYG1 family protein [Arabidopsis thaliana] (TAIR:AT2G03250.1); similar to EXS family protein / ERD1/XPR1/SYG1 family protein [Arabidopsis thaliana] (TAIR:AT2G03240.1); similar to SPX, N-terminal; EXS, C-terminal [Medicago truncatula] (GB:ABD…	355.228	2583.14	7.27178	0.137518
Brapa_ESTC025803	AT3G22190	Symbols: IQD5 | IQD5 (IQ-domain 5); calmodulin binding | chr3:7831668-7833519 REVERSE	919.927	6679.99	7.26143	0.137714
Brapa_ESTC029366	no_hits_f	---------	2689.93	19498.4	7.24866	0.137956
Brapa_ESTC009786	AT5G18500	| Symbols: | kinase | chr5:6139265-6141285 FORWARD	532.486	3849.47	7.22924	0.138327
Brapa_ESTC003952	no_hits_f	---------	1050.25	7563.86	7.20196	0.138851
Brapa_ESTC010735	AT3G01500	Symbols: CA1 | CA1 (CARBONIC ANHYDRASE 1); carbonate dehydratase/ zinc ion binding | chr3:195180-197880 REVERSE	1040.49	7491.82	7.20028	0.138883
Brapa_ESTC020964	AT4G09970	| Symbols: | unknown protein | chr4:6246035-6247594 FORWARD	431.109	3103.06	7.19785	0.13893
Brapa_ESTC015550	AT1G62780	Symbols: | similar to B0616E02-H0507E05.5 [Oryza sativa (indica cultivar-group)] (GB:CAH67829.1) | chr1:23253014-23254731 REVERSE	3118.79	22418.2	7.18811	0.139119
Brapa_ESTC023228	AT5G15230	Symbols: GASA4 | GASA4 (GAST1 PROTEIN HOMOLOG 4) | chr5:4945020-4946028 FORWARD	774.071	5555.11	7.17649	0.139344
Brapa_ESTC034913	AT1G74880	Symbols: NDH-O | NDH-O (NAD(P)H:PLASTOQUINONE DEHYDROGENASE COMPLEX SUBUNIT O) | chr1:28133773-28134681 REVERSE	772.029	5540.27	7.17625	0.139349
Brapa_ESTC012376	AT1G15215	Symbols: | similar to DNA binding / sequence-specific DNA binding / transcription factor [Arabidopsis thaliana] (TAIR:AT3G18380.1); similar to unknown protein [Oryza sativa (japonica cultivar-group)] (GB:BAD37623.1); contains domain Chromo domain-like (SSF54160) | chr1:5238091-5239765 FORWARD	850.211	6086.63	7.15896	0.139685
Brapa_ESTC003427	AT2G37660	Symbols: | catalytic/ coenzyme binding | chr2:15802559-15804055 REVERSE	501.325	3588.44	7.15791	0.139706
Brapa_ESTC005895	no_hits_f	---------	327.034	2339.77	7.15452	0.139772
Brapa_ESTC002801	AT1G73230	Symbols: | nascent polypeptide-associated complex (NAC) domain-containing protein | chr1:27544167-27545025 REVERSE	592.116	4217.61	7.12295	0.140391
Brapa_ESTC022489	AT2G32960	Symbols: | tyrosine specific protein phosphatase family protein | chr2:13995053-13997797 FORWARD	203.656	1450.4	7.12181	0.140414
Brapa_ESTC000737	AT2G17340	Symbols: | pantothenate kinase-related | chr2:7548697-7551171 REVERSE	179.288	1273.64	7.10388	0.140768
Brapa_ESTC000717	AT3G18080	Symbols: | glycosyl hydrolase family 1 protein | chr3:6191592-6194130 FORWARD	1739.7	12350.2	7.09904	0.140864
Brapa_ESTC013170	AT4G29360	Symbols: | glycosyl hydrolase family 17 protein | chr4:14451568-14453693 REVERSE	428.434	3038.53	7.09218	0.141
Brapa_ESTC002884	AT4G37930	Symbols: STM, SHMT1, SHM1 | SHM1 (SERINE HYDROXYMETHYLTRANSFERASE 1); glycine hydroxymethyltransferase | chr4:17831885-17834736 REVERSE	2056.94	14577.6	7.08703	0.141103
Brapa_ESTC023757	AT3G50470	Symbols: HR3 | HR3 (HOMOLOG OF RPW8 3) | chr3:18740127-18741143 FORWARD	723.283	5123.62	7.08384	0.141166
Brapa_ESTC029890	AT5G18350	Symbols: | disease resistance protein (TIR-NBS-LRR class), putative | chr5:6074525-6078571 REVERSE	372.406	2637.5	7.08232	0.141197
Brapa_ESTC013334	AT1G75840	Symbols: ARAC5, ATGP3, ROP4, , ATROP4 | /ATGP3/ATROP4 (RHO-LIKE GTP BINDING PROTEIN 4); GTP binding / GTPase | chr1:28479625-28481038 FORWARD	219.775	1552.3	7.06313	0.14158
Brapa_ESTC006662	AT2G25440	Symbols: | leucine-rich repeat family protein | chr2:10833814-10836481 FORWARD	172.59	1218.56	7.06043	0.141634
Brapa_ESTC038930	AT5G59540	Symbols: | oxidoreductase, 2OG-Fe(II) oxygenase family protein | chr5:24013519-24014802 REVERSE	4473.89	31548.7	7.05174	0.141809
Brapa_ESTC028601	no_hits_f	---------	438.622	3091.75	7.04878	0.141869
Brapa_ESTC014443	AT1G62750	Symbols: ATSCO1, ATSCO1/CPEF-G | ATSCO1/ATSCO1/CPEF-G (SNOWY COTYLEDON1); translation elongation factor/ translation factor, nucleic acid binding | chr1:23237287-23239986 REVERSE	2276.03	15989.5	7.02517	0.142345
Brapa_ESTC045679	AT5G16190	Symbols: CSLA11, ATCSLA11 | ATCSLA11 (Cellulose synthase-like A11); transferase, transferring glycosyl groups | chr5:5283666-5286296 REVERSE	268.2	1883.36	7.02222	0.142405
Brapa_ESTC011162	AT3G04520	Symbols: THA2 | THA2 (THREONINE ALDOLASE 2); threonine aldolase | chr3:1217403-1219577 REVERSE	163.293	1146.36	7.02026	0.142445
Brapa_ESTC019948	AT3G26060	Symbols: ATPRX Q | peroxiredoxin Q, putative | chr3:9526044-9527360 FORWARD	1031.91	7220.49	6.99721	0.142914
Brapa_ESTC025758	AT5G15900	Symbols: | similar to unknown protein [Arabidopsis thaliana] (TAIR:AT5G15890.1); similar to hypothetical protein [Cleome spinosa] (GB:ABD96865.1); contains InterPro domain Protein of unknown function DUF231, plant; (InterPro:IPR004253) | chr5:5189527-5192073 REVERSE	442.565	3094.48	6.99215	0.143018
Brapa_ESTC019488	AT1G64770	Symbols: | similar to unknown protein [Arabidopsis thaliana] (TAIR:AT1G55370.2); similar to Os03g0158300 [Oryza sativa (japonica cultivar-group)] (GB:NP_001049021.1); similar to Hypothetical protein [Oryza sativa (japonica cultivar-group)] (GB:AAN06836.1); contains InterPro domain Galactose mutarotase-like; (InterPro:IPR011013) | chr1:24061212-24062228 FORWARD	292.288	2040.31	6.98048	0.143257
Brapa_ESTC007826	AT1G07180	Symbols: ATNDI1, NDA1 | NDA1 (ALTERNATIVE NAD(P)H DEHYDROGENASE 1); NADH dehydrogenase | chr1:2204413-2206772 FORWARD	1191.54	8299.29	6.96518	0.143571
Brapa_ESTC009454	AT1G53990	Symbols: GLIP3 | GLIP3 (GDSL-motif lipase 3); carboxylic ester hydrolase/ lipase | chr1:20154684-20156420 FORWARD	267.897	1865.82	6.96469	0.143581
Brapa_ESTC044594	no_hits_f	---------	146.221	1016.96	6.95495	0.143782
Brapa_ESTC011860	AT2G19800	Symbols: MIOX2 | MIOX2 (MYO-INOSITOL OXYGENASE 2) | chr2:8538188-8540436 REVERSE	351.77	2446.16	6.95386	0.143805
Brapa_ESTC013789	AT1G73480	Symbols: | hydrolase, alpha/beta fold family protein | chr1:27632927-27636147 FORWARD	353.619	2456.77	6.94751	0.143937
Brapa_ESTC048631	AT3G55450	Symbols: | protein kinase, putative | chr3:20569106-20570940 FORWARD	451.324	3132.63	6.94098	0.144072
Brapa_ESTC006968	AT2G31530	Symbols: EMB2289, SCY2 | EMB2289/SCY2 (EMBRYO DEFECTIVE 2289, SECY HOMOLOG 2); protein translocase | chr2:13434485-13437385 FORWARD	1140.08	7905.54	6.9342	0.144213
Brapa_ESTC017713	AT1G21350	Symbols: | electron carrier/ oxidoreductase | chr1:7477364-7479000 REVERSE	324.746	2250.31	6.92945	0.144312
Brapa_ESTC006640	AT1G32060	Symbols: PRK | PRK (PHOSPHORIBULOKINASE); ATP binding / phosphoribulokinase/ protein binding | chr1:11532648-11534386 FORWARD	1107.4	7672.12	6.92805	0.144341
Brapa_ESTC013558	AT4G34920	Symbols: | 1-phosphatidylinositol phosphodiesterase-related | chr4:16635750-16636706 FORWARD	1521.2	10538.3	6.92762	0.14435
Brapa_ESTC001086	AT1G11860	Symbols: | aminomethyltransferase, putative | chr1:4001800-4003244 FORWARD	2320.58	16075.4	6.92732	0.144356
Brapa_ESTC027738	AT5G08050	Symbols: | similar to unknown protein [Arabidopsis thaliana] (TAIR:AT1G74730.1); similar to Os12g0575000 [Oryza sativa (japonica cultivar-group)] (GB:NP_001067105.1); similar to hypothetical protein LOC_Os11g27300 [Oryza sativa (japonica cultivar-group)] (GB:ABA93451.1); contains InterPro domain Protein of unknown function DUF1118; (InterPro:IPR009500) | chr5:2578419-2578965 FORWARD	1885.45	13043.2	6.91782	0.144554
Brapa_ESTC023751	AT2G30695	Symbols: | similar to Os01g0894700 [Oryza sativa (japonica cultivar-group)] (GB:NP_001045071.1); similar to P0696G06.13 [Oryza sativa (japonica cultivar-group)] (GB:BAC06256.1); similar to Os09g0515400 [Oryza sativa (japonica cultivar-group)] (GB:NP_001063667.1) | chr2:13086346-13088172 REVERSE	274.262	1894.43	6.90737	0.144773
Brapa_ESTC035854	AT1G10640	Symbols: | polygalacturonase, putative / pectinase, putative | chr1:3515479-3516932 REVERSE	367.615	2531.56	6.88644	0.145213
Brapa_ESTC018614	AT4G04540	Symbols: | protein kinase family protein | chr4:2259578-2262136 FORWARD	310.078	2128.74	6.86518	0.145663
Brapa_ESTC020713	AT5G12130	Symbols: PDE149 | PDE149 (PIGMENT DEFECTIVE 149) | chr5:3919614-3922155 FORWARD	974.499	6681.79	6.85664	0.145844
Brapa_ESTC031611	AT3G61080	Symbols: | fructosamine kinase family protein | chr3:22618127-22619858 FORWARD	375.063	2570.99	6.85482	0.145883
Brapa_ESTC047938	no_hits_f	---------	2434.19	16685.5	6.85464	0.145887
Brapa_ESTC023897	AT1G11720	Symbols: ATSS3 | ATSS3 (STARCH SYNTHASE 3); starch synthase/ transferase, transferring glycosyl groups | chr1:3952511-3956840 FORWARD	1225.16	8363.99	6.82686	0.14648
Brapa_ESTC048120	no_hits_f	---------	696.315	4752.16	6.82473	0.146526
Brapa_ESTC041426	AT2G31840	Symbols: | similar to unknown protein [Arabidopsis thaliana] (TAIR:AT4G28590.1); similar to Os05g0417200 [Oryza sativa (japonica cultivar-group)] (GB:NP_001055561.1); similar to unknown protein [Oryza sativa (japonica cultivar-group)] (GB:AAT77387.1); contains InterPro domain Thioredoxin-like fold; (InterPro:IPR012336); contains InterPro domain Thioredoxin fold; (InterPro:IPR012335) | chr2:135450…	1197.54	8153.76	6.80876	0.14687
Brapa_ESTC026195	AT5G61130	Symbols: | glycosyl hydrolase family protein 17 | chr5:24604664-24606595 REVERSE	837.428	5697.86	6.804	0.146972
Brapa_ESTC023110	AT4G10340	Symbols: LHCB5 | LHCB5 (LIGHT HARVESTING COMPLEX OF PHOTOSYSTEM II 5); chlorophyll binding | chr4:6408196-6409492 FORWARD	1000.72	6801.9	6.79701	0.147124
Brapa_ESTC049104	no_hits_f	---------	1689.05	11451.3	6.77973	0.147499
Brapa_ESTC013664	AT2G43560	Symbols: | immunophilin / FKBP-type peptidyl-prolyl cis-trans isomerase family protein | chr2:18081072-18082462 REVERSE	529.69	3591.08	6.77959	0.147502
Brapa_ESTC013480	AT1G32060	Symbols: PRK | PRK (PHOSPHORIBULOKINASE); ATP binding / phosphoribulokinase/ protein binding | chr1:11532648-11534386 FORWARD	1975.97	13390.5	6.77667	0.147565
Brapa_ESTC007976	AT4G15510	Symbols: | photosystem II reaction center PsbP family protein | chr4:8860699-8862527 FORWARD	1250.85	8464.19	6.76675	0.147781
Brapa_ESTC035712	no_hits_f	---------	1317.55	8908.53	6.76144	0.147898
Brapa_ESTC037878	AT2G20290	Symbols: ATXIG, XIG | XIG (Myosin-like protein XIG); motor/ protein binding | chr2:8750356-8758959 REVERSE	446.115	3016.08	6.76077	0.147912
Brapa_ESTC014067	AT4G39970	Symbols: | haloacid dehalogenase-like hydrolase family protein | chr4:18536672-18538423 REVERSE	166.01	1122.22	6.75995	0.14793
Brapa_ESTC028649	no_hits_f	---------	1384.71	9347.56	6.75055	0.148136
Brapa_ESTC043502	no_hits_f	---------	3623.41	24438.3	6.74456	0.148268
Brapa_ESTC010675	AT5G20630	Symbols: GLP3A, GLP3B, GLP3 | GLP3 (GERMIN-LIKE PROTEIN 3); manganese ion binding / metal ion binding / nutrient reservoir | chr5:6975317-6975952 REVERSE	2397.77	16171.1	6.74422	0.148275
Brapa_ESTC023032	AT3G47470	Symbols: CAB4, LHCA4 | LHCA4 (Photosystem I light harvesting complex gene 4); chlorophyll binding | chr3:17504607-17505758 REVERSE	3495.81	23517.6	6.72737	0.148647
Brapa_ESTC001105	AT1G04530	| Symbols: | binding | chr1:1234455-1235894 REVERSE	340.983	2293.8	6.72702	0.148654
Brapa_ESTC010246	AT5G38420	Symbols: | ribulose bisphosphate carboxylase small chain 2B / RuBisCO small subunit 2B (RBCS-2B) (ATS2B) | chr5:15398433-15399208 REVERSE	1625.79	10888.6	6.69742	0.149311
Brapa_ESTC023083	AT2G41950	Symbols: | similar to Os03g0226700 [Oryza sativa (japonica cultivar-group)] (GB:NP_001049441.1); similar to Methyltransferase type 11 [Syntrophobacter fumaroxidans MPOB] (GB:YP_847674.1); contains domain Hypothetical protein MTH1020 (SSF75569) | chr2:17520215-17521107 FORWARD	811.841	5432.66	6.69178	0.149437
Brapa_ESTC009495	AT5G22620	Symbols: | phosphoglycerate/bisphosphoglycerate mutase family protein | chr5:7517734-7520226 REVERSE	436.756	2920.29	6.68632	0.149559
Brapa_ESTC017629	AT5G04620	Symbols: ATBIOF | ATBIOF; 8-amino-7-oxononanoate synthase/ transaminase | chr5:1327293-1329935 FORWARD	303.194	2025.95	6.68203	0.149655
Brapa_ESTC010043	AT2G36360	Symbols: | kelch repeat-containing protein | chr2:15250540-15254602 REVERSE	516.668	3443.69	6.66519	0.150033
Brapa_ESTC011574	AT5G10480	Symbols: PEP, PAS2 | PAS2 (PASTICCINO 2) | chr5:3298048-3299981 REVERSE	932.099	6184.05	6.63454	0.150726
Brapa_ESTC032065	AT1G15215	Symbols: | similar to DNA binding / sequence-specific DNA binding / transcription factor [Arabidopsis thaliana] (TAIR:AT3G18380.1); similar to unknown protein [Oryza sativa (japonica cultivar-group)] (GB:BAD37623.1); contains domain Chromo domain-like (SSF54160) | chr1:5238091-5239765 FORWARD	1074.71	7129.44	6.63383	0.150743
Brapa_ESTC005585	AT4G37930	Symbols: STM, SHMT1, SHM1 | SHM1 (SERINE HYDROXYMETHYLTRANSFERASE 1); glycine hydroxymethyltransferase | chr4:17831885-17834736 REVERSE	1015.91	6718.53	6.61331	0.15121
Brapa_ESTC039262	AT1G02450	Symbols: NIMIN1, NIMIN-1 | NIMIN-1/NIMIN1; protein binding | chr1:498052-498480 REVERSE	1180.62	7792.12	6.60002	0.151515
Brapa_ESTC008070	AT1G17710	Symbols: | phosphoric monoester hydrolase | chr1:6090756-6091968 REVERSE	1062.34	6997.12	6.58652	0.151825
Brapa_ESTC045819	AT5G17170	Symbols: | rubredoxin family protein | chr5:5649337-5650977 FORWARD	3429.73	22520.9	6.56638	0.152291
Brapa_ESTC048910	no_hits_f	---------	414.475	2717.86	6.55736	0.1525
Brapa_ESTC006206	AT5G53420	Symbols: | similar to unknown protein [Arabidopsis thaliana] (TAIR:AT4G27900.2); similar to CCT [Medicago truncatula] (GB:ABE82748.1); contains InterPro domain CCT; (InterPro:IPR010402) | chr5:21691926-21692695 FORWARD	267.632	1747.76	6.53046	0.153129
Brapa_ESTC001593	AT5G51720	Symbols: | similar to zinc finger, CDGSH-type domain 2 [Homo sapiens] (GB:NP_001008389.1); similar to Os07g0467200 [Oryza sativa (japonica cultivar-group)] (GB:NP_001059590.1); similar to hypothetical protein [Homo sapiens] (GB:CAD97935.1); contains InterPro domain Zinc finger, CDGSH-type; (InterPro:IPR006622) | chr5:21026871-21027453 FORWARD	1834.41	11976.1	6.52858	0.153173
Brapa_ESTC020942	AT2G33180	Symbols: | similar to hypothetical protein [Triticum aestivum] (GB:CAJ19336.1); similar to Os09g0481800 [Oryza sativa (japonica cultivar-group)] (GB:NP_001063498.1) | chr2:14073556-14074391 FORWARD	2600.88	16978.8	6.5281	0.153184
Brapa_ESTC020366	AT5G17170	Symbols: | rubredoxin family protein | chr5:5649337-5650837 FORWARD	4282.15	27942.5	6.52534	0.153249
Brapa_ESTC006578	AT1G11860	Symbols: | aminomethyltransferase, putative | chr1:4001800-4003244 FORWARD	3468.08	22599	6.51629	0.153462
Brapa_ESTC037890	AT2G43340	Symbols: | similar to unknown protein [Arabidopsis thaliana] (TAIR:AT2G31560.2); similar to hypothetical protein [Oryza sativa (japonica cultivar-group)] (GB:BAB86085.1); similar to Os11g0282300 [Oryza sativa (japonica cultivar-group)] (GB:NP_001067693.1); similar to Os12g0230600 [Oryza sativa (japonica cultivar-group)] (GB:NP_001066444.1); contains InterPro domain Protein of unknown function DUF…	6686.74	43570.4	6.51594	0.15347
Brapa_ESTC002204	AT4G26530	Symbols: | fructose-bisphosphate aldolase | chr4:13391573-13392944 FORWARD	1442.5	9394.75	6.51282	0.153543
Brapa_ESTC030933	AT1G51940	Symbols: | protein kinase family protein / peptidoglycan-binding LysM domain-containing protein | chr1:19299761-19302610 REVERSE	692.128	4493.71	6.4926	0.154022
Brapa_ESTC005572	AT4G04570	Symbols: | protein kinase family protein | chr4:2290043-2292715 FORWARD	408.75	2648.29	6.479	0.154345
Brapa_ESTC044620	AT4G29210	Symbols: GGT3 | GGT3 (GAMMA-GLUTAMYL TRANSPEPTIDASE 3); gamma-glutamyltransferase/ glutathione gamma-glutamylcysteinyltransferase | chr4:14400996-14403325 FORWARD	188.479	1219.89	6.47229	0.154505
Brapa_ESTC024811	AT5G64810	Symbols: WRKY51 | WRKY51 (WRKY DNA-binding protein 51); transcription factor | chr5:25925641-25926913 FORWARD	154.901	1001.57	6.46587	0.154658
Brapa_ESTC048632	AT3G55450	Symbols: | protein kinase, putative | chr3:20569106-20570940 FORWARD	1177.96	7615.3	6.46482	0.154683
Brapa_ESTC000832	no_hits_f	---------	363.373	2349.14	6.46482	0.154683
Brapa_ESTC004716	AT3G61180	Symbols: | zinc finger (C3HC4-type RING finger) family protein | chr3:22656655-22658265 FORWARD	203.552	1313.38	6.45231	0.154983
Brapa_ESTC025483	no_hits_f	---------	1852.23	11932.7	6.44234	0.155223
Brapa_ESTC035744	AT5G50110	Symbols: | methyltransferase-related | chr5:20391428-20393294 FORWARD	766.852	4935.92	6.4366	0.155362
Brapa_ESTC001833	AT1G68590	Symbols: | plastid-specific 30S ribosomal protein 3, putative / PSRP-3, putative | chr1:25761256-25761832 REVERSE	3604.36	23194.1	6.43501	0.1554
Brapa_ESTC007802	AT2G42570	Symbols: | similar to unknown protein [Arabidopsis thaliana] (TAIR:AT2G31110.2); similar to unknown [Pisum sativum] (GB:ABA29158.1); contains InterPro domain Protein of unknown function DUF231, plant; (InterPro:IPR004253) | chr2:17724576-17726999 REVERSE	825.159	5301.49	6.42481	0.155647
Brapa_ESTC048364	no_hits_f	---------	217.393	1396.65	6.42454	0.155653
Brapa_ESTC020206	AT2G21330	Symbols: | fructose-bisphosphate aldolase | chr2:9135497-9137233 REVERSE	1603.46	10281.2	6.41188	0.15596
Brapa_ESTC020008	AT5G22620	Symbols: | phosphoglycerate/bisphosphoglycerate mutase family protein | chr5:7517734-7520226 REVERSE	1218.19	7803.34	6.40568	0.156111
Brapa_ESTC000227	AT3G47470	Symbols: CAB4, LHCA4 | LHCA4 (Photosystem I light harvesting complex gene 4); chlorophyll binding | chr3:17504607-17505758 REVERSE	4836.65	30950.1	6.39908	0.156273
Brapa_ESTC039840	AT1G20810	Symbols: | immunophilin / FKBP-type peptidyl-prolyl cis-trans isomerase family protein | chr1:7232014-7233356 FORWARD	1223.82	7829.99	6.39799	0.156299
Brapa_ESTC013217	AT1G61520	Symbols: LHCA3 | LHCA3 (Photosystem I light harvesting complex gene 3); chlorophyll binding | chr1:22703817-22704814 FORWARD	2356.57	15038.8	6.38165	0.156699
Brapa_ESTC005365	AT5G23960	Symbols: | terpene synthase/cyclase family protein | chr5:8092972-8095131 FORWARD	1081.93	6902.64	6.37993	0.156741
Brapa_ESTC018727	AT2G24270	Symbols: ALDH11A3 | ALDH11A3 (Aldehyde dehydrogenase 11A3); 3-chloroallyl aldehyde dehydrogenase/ glyceraldehyde-3-phosphate dehydrogenase (NADP+) | chr2:10334405-10336681 REVERSE	2599.98	16583.1	6.37816	0.156785
Brapa_ESTC014372	AT4G30950	Symbols: FADC, SFD4, FAD6 | FAD6 (FATTY ACID DESATURASE 6); omega-6 fatty acid desaturase | chr4:15057284-15059679 REVERSE	3133.4	19981.4	6.37691	0.156816
Brapa_ESTC017689	AT1G51600	Symbols: ZML2 | ZML2 (ZIM-LIKE 2); transcription factor | chr1:19136844-19138920 FORWARD	471.88	3008.8	6.3762	0.156833
Brapa_ESTC025977	AT2G42570	Symbols: | similar to unknown protein [Arabidopsis thaliana] (TAIR:AT2G31110.2); similar to unknown [Pisum sativum] (GB:ABA29158.1); contains InterPro domain Protein of unknown function DUF231, plant; (InterPro:IPR004253) | chr2:17724576-17726999 REVERSE	411.885	2617.74	6.35551	0.157344
Brapa_ESTC014355	AT1G32470	Symbols: | glycine cleavage system H protein, mitochondrial, putative | chr1:11739459-11740226 REVERSE	3800.47	24141.5	6.35224	0.157425
Brapa_ESTC003013	AT1G14270	Symbols: | CAAX amino terminal protease family protein | chr1:4875094-4877190 REVERSE	366.538	2327.9	6.35105	0.157454
Brapa_ESTC027039	AT5G06670	Symbols: | kinesin motor protein-related | chr5:2048244-2055020 REVERSE	356.879	2265.75	6.34879	0.15751
Brapa_ESTC000862	AT2G36885	Symbols: | similar to Os03g0137600 [Oryza sativa (japonica cultivar-group)] (GB:NP_001048903.1); similar to unknown [Sorghum bicolor] (GB:ABE77193.1); contains domain no description (G3D.1.20.20.10) | chr2:15489246-15490755 REVERSE	225.868	1433.66	6.34734	0.157546
Brapa_ESTC013259	AT5G02160	Symbols: | similar to hypothetical protein [Solanum lycopersicum] (GB:BAD95796.1) | chr5:426389-426895 FORWARD	708.903	4495.19	6.34105	0.157703
Brapa_ESTC019900	AT3G56160	Symbols: | bile acid:sodium symporter | chr3:20848712-20852520 REVERSE	956.25	6051.73	6.32861	0.158013
Brapa_ESTC034354	AT5G36910	Symbols: THI2.2 | THI2.2 (THIONIN 2.2); toxin receptor binding | chr5:14579283-14579903 REVERSE	1270.51	8024.3	6.31581	0.158333
Brapa_ESTC044257	no_hits_f	---------	208.186	1308.28	6.28419	0.15913
Brapa_ESTC023371	AT5G43745	Symbols: | phosphotransferase-related | chr5:17586662-17592181 REVERSE	321.768	2018.12	6.27197	0.159439
Brapa_ESTC016496	AT1G76790	Symbols: | O-methyltransferase family 2 protein | chr1:28827249-28828524 REVERSE	1014.92	6342.16	6.24893	0.160027
Brapa_ESTC031242	AT4G39620	Symbols: EMB2453 | EMB2453 (EMBRYO DEFECTIVE 2453); binding | chr4:18395288-18397572 FORWARD	3616.97	22596.9	6.24747	0.160065
Brapa_ESTC004661	AT2G36440	| Symbols: | unknown protein | chr2:15299727-15299951 FORWARD	302.398	1886.16	6.23734	0.160325
Brapa_ESTC028160	no_hits_f	---------	905.322	5641.45	6.23143	0.160477
Brapa_ESTC003257	AT3G02180	Symbols: SP1L, SP1L3 | SP1L3 (SPIRAL 1-LIKE3) | chr3:404996-405464 FORWARD	1684.13	10479.7	6.22262	0.160704
Brapa_ESTC013219	AT5G17230	Symbols: PSY | PSY (PHYTOENE SYNTHASE) | chr5:5659841-5662089 REVERSE	1012.89	6301.1	6.22091	0.160748
Brapa_ESTC022675	AT5G23060	Symbols: | similar to unknown protein [Arabidopsis thaliana] (TAIR:AT3G59780.1); similar to Rhodanese-like [Medicago truncatula] (GB:ABE85110.1); contains InterPro domain Rhodanese-like; (InterPro:IPR001763) | chr5:7736763-7738415 REVERSE	2945.03	18312.3	6.21804	0.160823
Brapa_ESTC038910	AT3G59210	| Symbols: | F-box family protein | chr3:21900919-21902530 FORWARD	254.898	1584.63	6.21672	0.160856
Brapa_ESTC000500	AT2G31570	Symbols: ATGPX2 | ATGPX2 (GLUTATHIONE PEROXIDASE 2); glutathione peroxidase | chr2:13445288-13446852 REVERSE	318.471	1975.65	6.20355	0.161198
Brapa_ESTC025551	AT1G62750	Symbols: ATSCO1, ATSCO1/CPEF-G | ATSCO1/ATSCO1/CPEF-G (SNOWY COTYLEDON1); translation elongation factor/ translation factor, nucleic acid binding | chr1:23237287-23239986 REVERSE	2471.61	15259.7	6.17399	0.16197
Brapa_ESTC001585	AT1G27595	Symbols: | similar to ESP4 (ENHANCED SILENCING PHENOTYPE 4), binding [Arabidopsis thaliana] (TAIR:AT5G01400.1); similar to Os07g0693900 [Oryza sativa (japonica cultivar-group)] (GB:NP_001060734.1); similar to symplekin [Xenopus tropicalis] (GB:NP_989259.1); contains domain ARM repeat (SSF48371); contains domain gb def: T22C5.3 (PTHR15245:SF6); contains domain FAMILY NOT NAMED (PTHR15245) | chr1:9…	452.824	2795.58	6.17366	0.161979
Brapa_ESTC030140	AT1G78995	Symbols: | similar to hypothetical protein [Oryza sativa (japonica cultivar-group)] (GB:BAD10530.1) | chr1:29720326-29720972 REVERSE	3979.61	24524	6.16241	0.162274
Brapa_ESTC042231	AT2G03150	Symbols: EMB1579 | EMB1579 (EMBRYO DEFECTIVE 1579); binding | chr2:952310-959001 FORWARD	594.003	3648.54	6.14229	0.162806
Brapa_ESTC046505	AT5G63790	Symbols: ANAC102 | ANAC102 (Arabidopsis NAC domain containing protein 102); transcription factor | chr5:25544113-25545239 REVERSE	2862.25	17575.6	6.14048	0.162854
Brapa_ESTC002631	AT5G38420	Symbols: | ribulose bisphosphate carboxylase small chain 2B / RuBisCO small subunit 2B (RBCS-2B) (ATS2B) | chr5:15398433-15399208 REVERSE	3297.09	20236.2	6.13759	0.16293
Brapa_ESTC006398	AT1G20270	Symbols: | oxidoreductase, 2OG-Fe(II) oxygenase family protein | chr1:7021373-7022913 REVERSE	827.695	5079.16	6.13651	0.162959
Brapa_ESTC005986	AT5G44590	Symbols: | similar to unknown protein [Arabidopsis thaliana] (TAIR:AT5G44600.1); similar to expressed protein [Oryza sativa (japonica cultivar-group)] (GB:ABF93757.1); contains domain no description (G3D.3.40.50.150); contains domain S-adenosyl-L-methionine-dependent methyltransferases (SSF53335) | chr5:18004818-18006454 FORWARD	857.732	5262.69	6.13559	0.162984
Brapa_ESTC004001	no_hits_f	---------	2706.9	16581.6	6.12568	0.163247
Brapa_ESTC019713	AT1G53800	| Symbols: | endonuclease | chr1:20085556-20087988 FORWARD	1034.46	6335.96	6.1249	0.163268
Brapa_ESTC014026	AT1G77060	| Symbols: | mutase family protein | chr1:28956698-28958343 REVERSE	776.503	4746.86	6.11313	0.163582
Brapa_ESTC021068	AT2G34860	Symbols: EDA3 | EDA3 (embryo sac development arrest 3) | chr2:14715459-14716883 FORWARD	3903.22	23810.3	6.10017	0.16393
Brapa_ESTC007349	AT1G69530	Symbols: EXP1, AT-EXP1, ATEXP1, ATHEXP ALPHA 1.2, ATEXPA1 | ATEXPA1 (ARABIDOPSIS THALIANA EXPANSIN A1) | chr1:26145697-26146714 FORWARD	230.309	1403.09	6.09221	0.164144
Brapa_ESTC051520	no_hits_f	---------	281.901	1714.03	6.08026	0.164467
Brapa_ESTC048435	no_hits_f	---------	372.148	2261.24	6.07618	0.164577
Brapa_ESTC034846	AT1G70200	Symbols: | RNA recognition motif (RRM)-containing protein | chr1:26436177-26438014 REVERSE	1168.04	7093.74	6.0732	0.164658
Brapa_ESTC042407	AT1G79680	Symbols: | wall-associated kinase, putative | chr1:29985081-29987642 REVERSE	222.675	1351.95	6.0714	0.164707
Brapa_ESTC005650	AT5G57900	Symbols: SKIP1 | SKIP1 (SKP1 INTERACTING PARTNER 1) | chr5:23467142-23468141 REVERSE	4185.68	25359	6.05851	0.165057
Brapa_ESTC047609	AT3G09050	Symbols: | similar to Os01g0853000 [Oryza sativa (japonica cultivar-group)] (GB:NP_001044830.1) | chr3:2764865-2765912 FORWARD	1148.71	6955.79	6.05531	0.165144
Brapa_ESTC021705	AT4G17050	| Symbols: | transcription factor | chr4:9589681-9592432 FORWARD	2545.22	15341.1	6.02742	0.165909
Brapa_ESTC042709	AT3G06483	Symbols: PDK | PDK (PYRUVATE DEHYDROGENASE KINASE); ATP binding / [pyruvate dehydrogenase (lipoamide)] kinase | chr3:1990733-1992587 REVERSE	215.446	1297.6	6.02285	0.166034
Brapa_ESTC039357	AT1G03475	Symbols: HEMF1, ATCPO-I, LIN2 | LIN2 (LESION INITIATION 2); coproporphyrinogen oxidase | chr1:869458-871176 REVERSE	673.7	4054.86	6.01879	0.166146
Brapa_ESTC034155	no_hits_f	---------	376.118	2263.22	6.01731	0.166187
Brapa_ESTC002761	AT3G02800	Symbols: | phosphoprotein phosphatase | chr3:606645-607711 REVERSE	357.277	2147.22	6.00996	0.16639
Brapa_ESTC012090	AT2G27190	Symbols: ATPAP1, PAP12, ATPAP12, PAP1 | PAP1 (PURPLE ACID PHOSPHATASE 1); acid phosphatase/ protein serine/threonine phosphatase | chr2:11628478-11630516 REVERSE	939.755	5646.43	6.00841	0.166433
Brapa_ESTC049153	no_hits_f	---------	324.886	1948.19	5.99653	0.166763
Brapa_ESTC005116	AT4G05210	Symbols: | bacterial transferase hexapeptide repeat-containing protein | chr4:2682865-2684897 FORWARD	1060.22	6356.18	5.99515	0.166801
Brapa_ESTC046986	no_hits_f	---------	478.564	2868.85	5.9947	0.166814
Brapa_ESTC017374	AT2G42870	Symbols: | similar to unknown protein [Arabidopsis thaliana] (TAIR:AT3G58850.1); similar to hypothetical protein [Oryza sativa (japonica cultivar-group)] (GB:BAB89478.1); contains InterPro domain Helix-loop-helix DNA-binding; (InterPro:IPR011598) | chr2:17843908-17844264 REVERSE	417.841	2503.48	5.99147	0.166904
Brapa_ESTC001750	AT4G39210	Symbols: APL3 | APL3 (large subunit of AGP 3) | chr4:18260326-18263175 FORWARD	342.989	2049.2	5.97454	0.167377
Brapa_ESTC010998	AT5G16030	Symbols: | similar to unknown protein [Arabidopsis thaliana] (TAIR:AT3G02500.1); similar to hypothetical protein [Cleome spinosa] (GB:ABD96956.1) | chr5:5238245-5240581 FORWARD	810.651	4840.66	5.97132	0.167467
Brapa_ESTC014352	AT1G73650	Symbols: | similar to unknown protein [Arabidopsis thaliana] (TAIR:AT1G18180.1); similar to hypothetical protein MtrDRAFT_AC139526g26v1 [Medicago truncatula] (GB:ABE80157.1); contains InterPro domain Protein of unknown function DUF1295; (InterPro:IPR010721); contains InterPro domain 3-oxo-5-alpha-steroid 4-dehydrogenase, C-terminal; (InterPro:IPR001104) | chr1:27692070-27693826 REVERSE	1421.82	8483.41	5.96659	0.1676
Brapa_ESTC019706	AT2G04235	Symbols: | similar to hypothetical protein [Trifolium pratense] (GB:BAE71230.1) | chr2:1449411-1455015 FORWARD	181.977	1085.4	5.96449	0.167659
Brapa_ESTC025383	AT3G09470	Symbols: | Identical to UNC93-like protein [Arabidopsis Thaliana] (GB:Q94AA1;GB:Q67XL1;GB:Q67Y57;GB:Q9SF56); similar to Protein of unknown function DUF895, eukaryotic [Medicago truncatula] (GB:ABE82090.1); contains InterPro domain Protein of unknown function DUF895, eukaryotic; (InterPro:IPR010291) | chr3:2911674-2914416 REVERSE	624.12	3719.16	5.95905	0.167812
Brapa_ESTC010668	AT5G23550	Symbols: | similar to unknown protein [Arabidopsis thaliana] (TAIR:AT5G24170.1); similar to PREDICTED: similar to SFT2 domain containing 2 [Bos taurus] (GB:XP_583469.1); similar to Os02g0564500 [Oryza sativa (japonica cultivar-group)] (GB:NP_001047161.1); similar to SFT2 domain containing 2 [Mus musculus] (GB:NP_663487.1); contains InterPro domain SFT2-like; (InterPro:IPR011691) | chr5:7939917-79…	737.88	4394.62	5.95574	0.167905
Brapa_ESTC011442	AT4G13590	Symbols: | similar to unknown protein [Arabidopsis thaliana] (TAIR:AT1G64150.1); similar to transmembrane protein FT27 [Synechocystis sp. PCC 6803] (GB:NP_442278.1); similar to Os11g0544500 [Oryza sativa (japonica cultivar-group)] (GB:NP_001068053.1); contains InterPro domain Protein of unknown function UPF0016; (InterPro:IPR001727) | chr4:7901365-7903788 REVERSE	1193.69	7098.36	5.94657	0.168164
Brapa_ESTC004832	AT1G26130	Symbols: | haloacid dehalogenase-like hydrolase family protein | chr1:9033587-9038233 FORWARD	188.17	1118.68	5.94505	0.168207
Brapa_ESTC006884	AT1G14700	Symbols: PAP3, ATPAP3 | ATPAP3/PAP3 (purple acid phosphatase 3) | chr1:5058675-5060983 FORWARD	250.042	1485.92	5.94268	0.168274
Brapa_ESTC006075	AT1G56050	Symbols: | GTP-binding protein-related | chr1:20967458-20969846 FORWARD	1089.82	6476.4	5.94263	0.168276
Brapa_ESTC028151	no_hits_f	---------	408.934	2429.42	5.94086	0.168326
Brapa_ESTC032029	AT1G70430	Symbols: | protein kinase family protein | chr1:26549252-26552419 FORWARD	393.835	2339.68	5.94076	0.168329
Brapa_ESTC018247	AT1G69090	| Symbols: | F-box family protein | chr1:25981164-25982369 REVERSE	371.551	2207.28	5.94072	0.16833
Brapa_ESTC048208	AT1G10522	Symbols: | similar to conserved hypothetical protein [Medicago truncatula] (GB:ABE91480.1); similar to Os09g0382400 [Oryza sativa (japonica cultivar-group)] (GB:NP_001063064.1) | chr1:3470010-3471292 FORWARD	2176.14	12909.4	5.93225	0.16857
Brapa_ESTC020479	AT5G20790	Symbols: | similar to unknown protein [Arabidopsis thaliana] (TAIR:AT3G43110.1); similar to conserved hypothetical protein [Medicago truncatula] (GB:ABE90972.1) | chr5:7040048-7040629 REVERSE	1943.8	11528.4	5.93086	0.16861
Brapa_ESTC046997	AT2G36895	Symbols: | similar to Os03g0152600 [Oryza sativa (japonica cultivar-group)] (GB:NP_001048993.1); similar to expressed protein [Oryza sativa (japonica cultivar-group)] (GB:ABF94025.1) | chr2:15496255-15497375 REVERSE	787.471	4668.25	5.92815	0.168687
Brapa_ESTC007825	AT5G04380	Symbols: | S-adenosyl-L-methionine:carboxyl methyltransferase family protein | chr5:1234884-1236318 FORWARD	1507.66	8931.21	5.92389	0.168808
Brapa_ESTC014066	AT5G14000	Symbols: ANAC084 | ANAC084 (Arabidopsis NAC domain containing protein 84); transcription factor | chr5:4518179-4519036 FORWARD	864.007	5113.38	5.91822	0.16897
Brapa_ESTC020189	AT5G10870	Symbols: ATCM2 | ATCM2 (CHORISMATE MUTASE 2); chorismate mutase | chr5:3430692-3432273 REVERSE	1490.77	8815.95	5.91369	0.169099
Brapa_ESTC040625	AT1G78050	Symbols: | phosphoglycerate/bisphosphoglycerate mutase family protein | chr1:29352989-29354486 FORWARD	854.981	5054.54	5.91187	0.169151
Brapa_ESTC019881	AT1G61520	Symbols: LHCA3 | LHCA3 (Photosystem I light harvesting complex gene 3); chlorophyll binding | chr1:22703817-22704814 FORWARD	4464.28	26348.8	5.90214	0.16943
Brapa_ESTC011583	AT4G19985	Symbols: | GCN5-related N-acetyltransferase (GNAT) family protein | chr4:10830552-10831721 REVERSE	1412.93	8338.16	5.90133	0.169453
Brapa_ESTC010320	AT2G04790	Symbols: | similar to conserved hypothetical protein [Medicago truncatula] (GB:ABE79920.1) | chr2:1679525-1680324 FORWARD	181.379	1070	5.89925	0.169513
Brapa_ESTC023168	AT3G02730	Symbols: TRXF1, ATF1 | ATF1/TRXF1 (THIOREDOXIN F-TYPE 1); thiol-disulfide exchange intermediate | chr3:588577-589598 REVERSE	537.351	3168.23	5.89602	0.169606
Brapa_ESTC026776	AT2G19760	Symbols: PFN1, PRF1 | PFN1/PRF1 (PROFILIN 1); actin binding | chr2:8524156-8525149 REVERSE	355.877	2098.13	5.89566	0.169616
Brapa_ESTC012850	AT1G16360	Symbols: | LEM3 (ligand-effect modulator 3) family protein / CDC50 family protein | chr1:5593487-5595173 REVERSE	222.085	1308.7	5.89279	0.169699
Brapa_ESTC035294	AT1G32060	Symbols: PRK | PRK (PHOSPHORIBULOKINASE); ATP binding / phosphoribulokinase/ protein binding | chr1:11532648-11534386 FORWARD	2118.05	12469.4	5.88721	0.16986
Brapa_ESTC013671	AT1G12900	Symbols: GAPA-2 | GAPA-2; glyceraldehyde-3-phosphate dehydrogenase | chr1:4392632-4394281 REVERSE	368.343	2165.22	5.87827	0.170118
Brapa_ESTC017448	AT4G04760	Symbols: | sugar transporter family protein | chr4:2424162-2427767 FORWARD	230.485	1352.59	5.86845	0.170403
Brapa_ESTC014534	AT1G62750	Symbols: ATSCO1, ATSCO1/CPEF-G | ATSCO1/ATSCO1/CPEF-G (SNOWY COTYLEDON1); translation elongation factor/ translation factor, nucleic acid binding | chr1:23237287-23239986 REVERSE	5338.29	31316.3	5.86635	0.170464
Brapa_ESTC029606	no_hits_f	---------	699.119	4098.56	5.86246	0.170577
Brapa_ESTC002578	AT1G52870	Symbols: | peroxisomal membrane protein-related | chr1:19689524-19691346 FORWARD	2636.54	15433	5.8535	0.170838
Brapa_ESTC005497	AT3G61080	Symbols: | fructosamine kinase family protein | chr3:22618127-22619858 FORWARD	271.274	1581.34	5.82931	0.171547
Brapa_ESTC049292	no_hits_f	---------	752.546	4386.49	5.82887	0.17156
Brapa_ESTC011965	AT2G42690	| Symbols: | lipase, putative | chr2:17783433-17784759 REVERSE	1108.03	6457.18	5.82762	0.171597
Brapa_ESTC017762	AT2G18328	| Symbols: | DNA binding | chr2:7971560-7971793 FORWARD	401.22	2336.12	5.82254	0.171746
Brapa_ESTC023997	AT1G08350	Symbols: | endomembrane protein 70 family protein | chr1:2632967-2635602 REVERSE	449.866	2611.67	5.80544	0.172252
Brapa_ESTC051930	AT2G05530	| Symbols: | glycine-rich protein | chr2:2029752-2030317 FORWARD	10701.9	61927.3	5.78657	0.172814
Brapa_ESTC003630	no_hits_f	---------	1095.51	6335.14	5.78282	0.172926
Brapa_ESTC029261	no_hits_f	---------	263.066	1518.67	5.77296	0.173221
Brapa_ESTC020092	AT5G43990	Symbols: SUVR2 | SUVR2; histone-lysine N-methyltransferase/ zinc ion binding | chr5:17715750-17718960 FORWARD	315.75	1822.38	5.77159	0.173262
Brapa_ESTC009412	AT4G17910	Symbols: | zinc finger (C3HC4-type RING finger) family protein / pentatricopeptide (PPR) repeat-containing protein | chr4:9948866-9960416 REVERSE	910.027	5250.49	5.7696	0.173322
Brapa_ESTC024906	AT2G31230	Symbols: ATERF15 | ATERF15 (ETHYLENE-RESPONSIVE ELEMENT BINDING FACTOR 15); DNA binding / transcription factor/ transcriptional activator | chr2:13313753-13314484 REVERSE	611.615	3523.45	5.7609	0.173584
Brapa_ESTC014556	AT2G46430	Symbols: CNGC3, ATCNGC3 | ATCNGC3 (CYCLIC NUCLEOTIDE GATED CHANNEL 3); calmodulin binding / cyclic nucleotide binding / ion channel | chr2:19065545-19068346 FORWARD	2509.86	14454.9	5.75925	0.173634
Brapa_ESTC005931	AT3G02250	Symbols: | similar to unknown protein [Arabidopsis thaliana] (TAIR:AT5G15740.1); similar to hypothetical protein [Cleome spinosa] (GB:ABD96934.1); similar to Os06g0284200 [Oryza sativa (japonica cultivar-group)] (GB:NP_001057398.1); similar to hypothetical protein [Cleome spinosa] (GB:ABD96844.1); contains InterPro domain Protein of unknown function DUF246, plant; (InterPro:IPR004348) | chr3:4241…	477.916	2749.08	5.75222	0.173846
Brapa_ESTC007433	AT1G11720	Symbols: ATSS3 | ATSS3 (STARCH SYNTHASE 3); starch synthase/ transferase, transferring glycosyl groups | chr1:3952511-3956840 FORWARD	372.165	2138.96	5.74734	0.173993
Brapa_ESTC030167	no_hits_f	---------	467.854	2677.32	5.72255	0.174747
Brapa_ESTC005510	AT4G28660	Symbols: PSB28 | photosystem II reaction centre W (PsbW) family protein | chr4:14150014-14150939 FORWARD	478.93	2740.69	5.72253	0.174748
Brapa_ESTC011533	AT4G24090	Symbols: | similar to unknown protein [Oryza sativa (japonica cultivar-group)] (GB:BAD33764.1); contains domain Metalloproteases ("zincins"), catalytic domain (SSF55486) | chr4:12512752-12514477 FORWARD	660.676	3775.51	5.71462	0.17499
Brapa_ESTC001536	AT4G28750	Symbols: PSAE-1 | PSAE-1 (PSA E1 KNOCKOUT) | chr4:14202957-14203894 REVERSE	772.919	4414.54	5.71152	0.175085
Brapa_ESTC015759	AT2G21385	Symbols: | similar to Os09g0531100 [Oryza sativa (japonica cultivar-group)] (GB:NP_001063753.1); similar to conserved hypothetical protein [Medicago truncatula] (GB:ABE89529.1) | chr2:9157242-9158832 FORWARD	462.028	2635.53	5.70426	0.175307
Brapa_ESTC019480	AT4G21280	Symbols: PSBQ, PSBQA, PSBQ-1 | PSBQ/PSBQ-1/PSBQA; calcium ion binding | chr4:11334456-11335597 FORWARD	3485.01	19872.2	5.70219	0.175371
Brapa_ESTC003962	no_hits_f	---------	753.425	4290.9	5.69519	0.175587
Brapa_ESTC000054	AT3G12930	Symbols: | similar to Os09g0493600 [Oryza sativa (japonica cultivar-group)] (GB:NP_001063546.1); similar to Protein Iojap (GB:Q41822); contains InterPro domain Iojap-related protein; (InterPro:IPR004394) | chr3:4128472-4129623 FORWARD	329.565	1876.78	5.69472	0.175601
Brapa_ESTC035802	AT1G56500	Symbols: | haloacid dehalogenase-like hydrolase family protein | chr1:21163440-21170757 FORWARD	345.793	1968.28	5.69208	0.175683
Brapa_ESTC003921	no_hits_f	---------	379.002	2157.24	5.6919	0.175688
Brapa_ESTC025633	AT2G46890	Symbols: | similar to unknown protein [Arabidopsis thaliana] (TAIR:AT1G18180.1); similar to B0616E02-H0507E05.2 [Oryza sativa (indica cultivar-group)] (GB:CAH67826.1); contains InterPro domain Protein of unknown function DUF1295; (InterPro:IPR010721); contains InterPro domain 3-oxo-5-alpha-steroid 4-dehydrogenase, C-terminal; (InterPro:IPR001104) | chr2:19273948-19275203 REVERSE	1543.11	8777.83	5.6884	0.175796
Brapa_ESTC000509	AT2G06520	Symbols: PSBX | PSBX (photosystem II subunit X) | chr2:2587865-2588215 REVERSE	3794.83	21548.4	5.67836	0.176107
Brapa_ESTC043789	AT1G48350	Symbols: | ribosomal protein L18 family protein | chr1:17870937-17871883 FORWARD	2266.8	12862.6	5.67434	0.176232
Brapa_ESTC009099	AT2G16430	Symbols: PAP10 | PAP10; acid phosphatase/ protein serine/threonine phosphatase | chr2:7127584-7129854 REVERSE	227.827	1291.23	5.66759	0.176442
Brapa_ESTC000268	AT2G17972	Symbols: | similar to conserved hypothetical protein [Medicago truncatula] (GB:ABE81091.1); similar to Os06g0715200 [Oryza sativa (japonica cultivar-group)] (GB:NP_001058582.1) | chr2:7828706-7829182 FORWARD	2715.25	15376	5.66283	0.17659
Brapa_ESTC038413	AT4G17050	| Symbols: | transcription factor | chr4:9589681-9592432 FORWARD	618.402	3501.22	5.66172	0.176625
Brapa_ESTC037965	AT1G71400	Symbols: | disease resistance family protein / LRR family protein | chr1:26913567-26916110 FORWARD	645.977	3656.95	5.66111	0.176644
Brapa_ESTC043780	AT3G55080	Symbols: | SET domain-containing protein | chr3:20422453-20426807 REVERSE	422.204	2389.33	5.65918	0.176704
Brapa_ESTC050626	AT3G55450	Symbols: | protein kinase, putative | chr3:20569106-20570940 FORWARD	808.087	4567.27	5.65195	0.17693
Brapa_ESTC043363	AT3G28480	Symbols: | oxidoreductase, 2OG-Fe(II) oxygenase family protein | chr3:10677503-10679499 REVERSE	912.904	5159.16	5.65137	0.176948
Brapa_ESTC003528	no_hits_f	---------	857.277	4842.9	5.64917	0.177017
Brapa_ESTC028303	no_hits_f	---------	280.718	1585.68	5.64866	0.177033
Brapa_ESTC047291	AT4G29060	Symbols: EMB2726 | EMB2726 (EMBRYO DEFECTIVE 2726); translation elongation factor | chr4:14317750-14321321 FORWARD	1015.81	5735.21	5.64595	0.177118
Brapa_ESTC037960	AT1G18265	Symbols: | similar to unknown protein [Arabidopsis thaliana] (TAIR:AT4G13160.1); similar to Protein of unknown function DUF593 [Medicago truncatula] (GB:ABE92876.1); contains InterPro domain Protein of unknown function DUF593; (InterPro:IPR007656) | chr1:6282331-6283173 REVERSE	705.786	3983.6	5.6442	0.177173
Brapa_ESTC005869	AT5G16660	Symbols: | similar to unknown protein [Arabidopsis thaliana] (TAIR:AT3G02900.1); similar to hypothetical protein [Plantago major] (GB:CAH59416.1) | chr5:5465702-5467009 REVERSE	2526.19	14238.9	5.63651	0.177415
Brapa_ESTC022975	AT1G61520	Symbols: LHCA3 | LHCA3 (Photosystem I light harvesting complex gene 3) | chr1:22704158-22704814 FORWARD	6114.17	34441.1	5.633	0.177525
Brapa_ESTC005945	AT3G13650	Symbols: | disease resistance response | chr3:4463063-4463623 FORWARD	2328.47	13108.8	5.62979	0.177626
Brapa_ESTC018971	AT2G34340	Symbols: | similar to unknown protein [Arabidopsis thaliana] (TAIR:AT1G29640.1); similar to hypothetical protein [Oryza sativa (japonica cultivar-group)] (GB:BAD86925.1); contains InterPro domain Protein of unknown function DUF584; (InterPro:IPR007608) | chr2:14496111-14496521 REVERSE	1745.89	9828.47	5.62949	0.177636
Brapa_ESTC005659	AT1G14040	Symbols: | similar to EXS family protein / ERD1/XPR1/SYG1 family protein [Arabidopsis thaliana] (TAIR:AT2G03260.1); similar to EXS family protein / ERD1/XPR1/SYG1 family protein [Arabidopsis thaliana] (TAIR:AT2G03250.1); similar to EXS family protein / ERD1/XPR1/SYG1 family protein [Arabidopsis thaliana] (TAIR:AT2G03240.1); similar to SPX, N-terminal; EXS, C-terminal [Medicago truncatula] (GB:ABD…	301.33	1695.98	5.62831	0.177673
Brapa_ESTC005851	no_hits_f	---------	7442.96	41866.9	5.62503	0.177777
Brapa_ESTC039097	AT5G49330	Symbols: AtMYB111 | AtMYB111 (myb domain protein 111); DNA binding / transcription factor | chr5:20016373-20018519 REVERSE	627.788	3525.31	5.61545	0.17808
Brapa_ESTC000317	AT3G62030	Symbols: ROC4 | ROC4 (rotamase CyP 4); peptidyl-prolyl cis-trans isomerase | chr3:22984683-22986114 FORWARD	3329.03	18684.2	5.61251	0.178174
Brapa_ESTC029205	AT1G53120	Symbols: | RNA-binding S4 domain-containing protein | chr1:19796466-19798273 FORWARD	570.752	3202.42	5.61088	0.178225
Brapa_ESTC037784	AT3G25110	Symbols: ATFATA | ATFATA (ARABIDOPSIS FATA ACYL-ACP THIOESTERASE); acyl carrier/ acyl-ACP thioesterase | chr3:9146596-9148280 REVERSE	376.256	2109.88	5.60757	0.178331
Brapa_ESTC035003	AT1G15940	Symbols: | similar to binding [Arabidopsis thaliana] (TAIR:AT1G80810.1); similar to Tudor [Medicago truncatula] (GB:ABE86625.1); contains domain ARM repeat (SSF48371); contains domain no description (G3D.2.30.30.140); contains domain ANDROGEN INDUCED INHIBITOR OF PROLIFERATION (AS3) / PDS5-RELATED (PTHR12663) | chr1:5473666-5478044 FORWARD	700.838	3926.63	5.60276	0.178483
Brapa_ESTC001655	no_hits_f	---------	2108.26	11810.4	5.60197	0.178509
Brapa_ESTC043909	AT3G59200	| Symbols: | F-box family protein | chr3:21898461-21900191 FORWARD	266.897	1494.4	5.59916	0.178598
Brapa_ESTC051161	no_hits_f	---------	458.941	2569.68	5.59915	0.178599
Brapa_ESTC010957	AT2G39080	Symbols: | similar to unnamed protein product [Ostreococcus tauri] (GB:CAL54696.1); similar to Os01g0367100 [Oryza sativa (japonica cultivar-group)] (GB:NP_001043040.1); contains domain NAD(P)-binding Rossmann-fold domains (SSF51735); contains domain no description (G3D.3.40.50.720) | chr2:16317059-16319553 REVERSE	856.218	4794.02	5.59906	0.178601
Brapa_ESTC003483	AT4G23430	Symbols: | short-chain dehydrogenase/reductase (SDR) family protein | chr4:12229181-12231503 FORWARD	1327.33	7428.17	5.59632	0.178689
Brapa_ESTC001184	AT5G52960	Symbols: | similar to hypothetical protein asr2994 [Nostoc sp. PCC 7120] (GB:NP_487034.1); similar to Os05g0569200 [Oryza sativa (japonica cultivar-group)] (GB:NP_001056361.1) | chr5:21494476-21495495 FORWARD	2424.08	13565.1	5.59598	0.1787
Brapa_ESTC020550	AT4G23990	Symbols: CSLG3, ATCSLG3 | ATCSLG3 (Cellulose synthase-like G3); transferase/ transferase, transferring glycosyl groups | chr4:12456501-12460508 FORWARD	1615.81	9039.69	5.59453	0.178746
Brapa_ESTC025390	AT3G47470	Symbols: CAB4, LHCA4 | LHCA4 (Photosystem I light harvesting complex gene 4); chlorophyll binding | chr3:17504607-17505758 REVERSE	2233.67	12495.3	5.59407	0.178761
Brapa_ESTC000582	AT5G61050	Symbols: | histone deacetylase-related / HD-related | chr5:24582708-24583841 REVERSE	1462.82	8157.24	5.57638	0.179328
Brapa_ESTC018585	AT3G15354	Symbols: SPA3 | SPA3 (SPA1-RELATED 3); signal transducer | chr3:5169334-5172487 REVERSE	449.086	2501.23	5.5696	0.179546
Brapa_ESTC004343	AT4G16420	Symbols: PRZ1, ADA2B | ADA2B (PROPORZ1); DNA binding / transcription factor | chr4:9262828-9265798 REVERSE	286.24	1593.33	5.56641	0.179649
Brapa_ESTC011772	AT2G32150	Symbols: | haloacid dehalogenase-like hydrolase family protein | chr2:13666172-13667608 FORWARD	1582.85	8798.04	5.55835	0.179909
Brapa_ESTC002661	AT1G08380	Symbols: PSAO | PSAO (photosystem I subunit O) | chr1:2641001-2641736 REVERSE	1928.06	10711.3	5.55548	0.180002
Brapa_ESTC013304	AT3G63140	Symbols: | mRNA-binding protein, putative | chr3:23337981-23339595 REVERSE	1090.67	6056.68	5.55317	0.180077
Brapa_ESTC051445	AT4G23800	Symbols: | high mobility group (HMG1/2) family protein | chr4:12390238-12392526 FORWARD	666.487	3697.12	5.54717	0.180272
Brapa_ESTC026669	AT1G76450	Symbols: | oxygen-evolving complex-related | chr1:28689512-28691003 FORWARD	308.511	1709.26	5.54035	0.180494
Brapa_ESTC037488	no_hits_f	---------	185.323	1026.27	5.53774	0.180579
Brapa_ESTC045359	AT5G04190	Symbols: PKS4 | PKS4 (PHYTOCHROME KINASE SUBSTRATE 4) | chr5:1151115-1152335 FORWARD	219.096	1211.84	5.53109	0.180796
Brapa_ESTC047730	no_hits_f	---------	1880.15	10396.6	5.52967	0.180843
Brapa_ESTC022716	AT3G57240	Symbols: BG3 | BG3 (BETA-1,3-GLUCANASE 3); hydrolase, hydrolyzing O-glycosyl compounds | chr3:21192895-21194024 REVERSE	5822.77	32197.2	5.52953	0.180847
Brapa_ESTC011130	AT3G19900	Symbols: | similar to hypothetical protein [Oryza sativa (japonica cultivar-group)] (GB:BAD22944.1) | chr3:6922858-6924563 REVERSE	952.496	5254.73	5.5168	0.181264
Brapa_ESTC051373	no_hits_f	---------	317.593	1751.39	5.51457	0.181338
Brapa_ESTC012658	AT3G08740	Symbols: | elongation factor P (EF-P) family protein | chr3:2654794-2656160 REVERSE	832.306	4587.53	5.51183	0.181428
Brapa_ESTC016028	AT1G62750	Symbols: ATSCO1, ATSCO1/CPEF-G | ATSCO1/ATSCO1/CPEF-G (SNOWY COTYLEDON1); translation elongation factor/ translation factor, nucleic acid binding | chr1:23237287-23239986 REVERSE	4564.89	25137.8	5.50677	0.181595
Brapa_ESTC050517	no_hits_f	---------	544.172	2993.33	5.50071	0.181795
Brapa_ESTC035988	AT1G73110	Symbols: | ribulose bisphosphate carboxylase/oxygenase activase, putative / RuBisCO activase, putative | chr1:27498005-27500505 REVERSE	1582.49	8698.45	5.49669	0.181928
Brapa_ESTC023025	AT3G47470	Symbols: CAB4, LHCA4 | LHCA4 (Photosystem I light harvesting complex gene 4); chlorophyll binding | chr3:17504607-17505758 REVERSE	4108.11	22525.8	5.48325	0.182374
Brapa_ESTC022723	AT5G20670	Symbols: | similar to unknown protein [Arabidopsis thaliana] (TAIR:AT1G72510.2); similar to 4Fe-4S ferredoxin, iron-sulfur binding [Medicago truncatula] (GB:ABE81755.1); contains InterPro domain Protein of unknown function DUF1677, plant; (InterPro:IPR012876) | chr5:6993334-6993795 REVERSE	264.424	1449.77	5.48275	0.18239
Brapa_ESTC039420	AT1G09340	Symbols: | catalytic/ coenzyme binding | chr1:3015475-3018037 FORWARD	567.417	3107.31	5.47624	0.182607
Brapa_ESTC049885	no_hits_f	---------	841.491	4604.73	5.47211	0.182745
Brapa_ESTC010887	AT1G25230	Symbols: | purple acid phosphatase family protein | chr1:8840461-8842285 REVERSE	893.029	4882.01	5.4668	0.182922
Brapa_ESTC039042	AT3G47590	Symbols: | esterase/lipase/thioesterase family protein | chr3:17547118-17548500 REVERSE	500.517	2733.4	5.46115	0.183112
Brapa_ESTC000577	AT5G67370	Symbols: | similar to unknown protein [Arabidopsis thaliana] (TAIR:AT5G11840.1); similar to Protein of unknown function DUF1230 [Medicago truncatula] (GB:ABE85761.1); contains InterPro domain Protein of unknown function DUF1230; (InterPro:IPR009631) | chr5:26894893-26896691 REVERSE	2647.18	14446.9	5.45747	0.183235
Brapa_ESTC009013	AT3G58690	Symbols: | protein kinase family protein | chr3:21720346-21722223 FORWARD	1417.34	7733.41	5.45628	0.183275
Brapa_ESTC013227	AT1G64770	Symbols: | similar to unknown protein [Arabidopsis thaliana] (TAIR:AT1G55370.2); similar to Os03g0158300 [Oryza sativa (japonica cultivar-group)] (GB:NP_001049021.1); similar to Hypothetical protein [Oryza sativa (japonica cultivar-group)] (GB:AAN06836.1); contains InterPro domain Galactose mutarotase-like; (InterPro:IPR011013) | chr1:24061212-24063078 FORWARD	3576.49	19511.5	5.45549	0.183302
Brapa_ESTC046190	AT5G47380	Symbols: | similar to unknown protein [Arabidopsis thaliana] (TAIR:AT5G66600.1); similar to hypothetical protein 24.t00022 [Brassica oleracea] (GB:ABD64944.1); contains InterPro domain Protein of unknown function DUF547; (InterPro:IPR006869) | chr5:19238699-19241698 REVERSE	233.218	1267.01	5.43273	0.18407
Brapa_ESTC015499	AT3G50685	Symbols: | similar to p-166-4_1 [Pinus resinosa] (GB:AAY17046.1); similar to Os10g0213700 [Oryza sativa (japonica cultivar-group)] (GB:NP_001064326.1) | chr3:18845253-18845729 REVERSE	1038.79	5638.87	5.42831	0.18422
Brapa_ESTC001701	AT5G56760	Symbols: SAT5, SAT-52, AtSerat1;1 | AtSerat1;1 (SERINE ACETYLTRANSFERASE 52); serine O-acetyltransferase | chr5:22978724-22979808 REVERSE	201.81	1094.36	5.42272	0.184409
Brapa_ESTC016010	AT2G28410	Symbols: | similar to unknown protein [Arabidopsis thaliana] (TAIR:AT5G60650.1) | chr2:12163279-12163626 FORWARD	309.866	1678.46	5.41673	0.184613
Brapa_ESTC006628	AT3G25690	Symbols: CHUP1 | CHUP1 (CHLOROPLAST UNUSUAL POSITIONING 1) | chr3:9355298-9358994 FORWARD	1105.88	5978.9	5.40646	0.184964
Brapa_ESTC039213	AT1G03055	Symbols: | similar to unknown protein [Arabidopsis thaliana] (TAIR:AT1G64680.1); similar to hypothetical protein LOC_Os11g37650 [Oryza sativa (japonica cultivar-group)] (GB:ABA94460.1) | chr1:710102-711763 REVERSE	201.703	1089.76	5.4028	0.185089
Brapa_ESTC010770	AT4G25780	Symbols: | pathogenesis-related protein, putative | chr4:13121116-13121688 FORWARD	1075.47	5809.06	5.40142	0.185137
Brapa_ESTC039892	AT1G21090	Symbols: | hydroxyproline-rich glycoprotein family protein | chr1:7384843-7386188 FORWARD	1440.15	7770.66	5.39573	0.185332
Brapa_ESTC013299	AT1G72030	Symbols: | GCN5-related N-acetyltransferase (GNAT) family protein | chr1:27114549-27115487 FORWARD	729.065	3930.57	5.39125	0.185486
Brapa_ESTC023650	AT5G64810	Symbols: WRKY51 | WRKY51 (WRKY DNA-binding protein 51); transcription factor | chr5:25925641-25926913 FORWARD	1405.91	7573.35	5.3868	0.185639
Brapa_ESTC005375	AT4G29060	Symbols: EMB2726 | EMB2726 (EMBRYO DEFECTIVE 2726); translation elongation factor | chr4:14317750-14321321 FORWARD	1640.09	8831.42	5.38472	0.185711
Brapa_ESTC041592	no_hits_f	---------	1377.28	7400.99	5.37363	0.186094
Brapa_ESTC005743	AT5G45890	Symbols: SAG12 | SAG12 (SENESCENCE-ASSOCIATED GENE 12); cysteine-type peptidase | chr5:18630527-18631986 FORWARD	289.319	1554.04	5.37137	0.186172
Brapa_ESTC037370	AT4G11850	Symbols: MEE54 | PLDGAMMA1 (maternal effect embryo arrest 54); phospholipase D | chr4:7129346-7132931 REVERSE	696.208	3739.32	5.37098	0.186186
Brapa_ESTC001329	no_hits_f	---------	230.921	1236.39	5.35417	0.18677
Brapa_ESTC001835	no_hits_f	---------	3485.72	18631.7	5.34515	0.187085
Brapa_ESTC051175	AT5G59150	Symbols: AtRABA2d | AtRABA2d (Arabidopsis Rab GTPase homolog A2d); GTP binding | chr5:23894084-23895470 FORWARD	259.442	1383.67	5.33325	0.187503
Brapa_ESTC000229	AT4G38900	| Symbols: | DNA binding | chr4:18139558-18141514 REVERSE	812.252	4322.92	5.32214	0.187894
Brapa_ESTC016332	AT3G25690	Symbols: CHUP1 | CHUP1 (CHLOROPLAST UNUSUAL POSITIONING 1) | chr3:9355298-9358994 FORWARD	2481.43	13203	5.32072	0.187944
Brapa_ESTC025460	AT5G62230	Symbols: ERL1 | ERL1 (ERECTA-LIKE 1); kinase | chr5:25013659-25019356 FORWARD	452.728	2408.71	5.32044	0.187955
Brapa_ESTC050625	AT3G55450	Symbols: | protein kinase, putative | chr3:20569106-20570940 FORWARD	909.718	4833.07	5.31271	0.188228
Brapa_ESTC042100	AT1G01680	Symbols: | U-box domain-containing protein | chr1:246411-248329 REVERSE	1178.28	6253.01	5.3069	0.188434
Brapa_ESTC023069	AT2G43340	Symbols: | similar to unknown protein [Arabidopsis thaliana] (TAIR:AT2G31560.2); similar to hypothetical protein [Oryza sativa (japonica cultivar-group)] (GB:BAB86085.1); similar to Os11g0282300 [Oryza sativa (japonica cultivar-group)] (GB:NP_001067693.1); similar to Os12g0230600 [Oryza sativa (japonica cultivar-group)] (GB:NP_001066444.1); contains InterPro domain Protein of unknown function DUF…	7962.14	42228.8	5.3037	0.188548
Brapa_ESTC027546	AT4G00480	Symbols: MYC1, ATMYC1 | ATMYC1 (Arabidopsis thaliana myc-related transcription factor 1); DNA binding / transcription factor | chr4:217106-219684 REVERSE	685.621	3633.71	5.29988	0.188683
Brapa_ESTC022686	AT4G33690	Symbols: | similar to nucleic acid binding [Arabidopsis thaliana] (TAIR:AT3G23900.2); similar to Os07g0213400 [Oryza sativa (japonica cultivar-group)] (GB:NP_001059181.1); similar to unknown protein [Oryza sativa (japonica cultivar-group)] (GB:BAD05599.1) | chr4:16175201-16176140 FORWARD	997.892	5286.92	5.29809	0.188747
Brapa_ESTC024133	AT1G68590	Symbols: | plastid-specific 30S ribosomal protein 3, putative / PSRP-3, putative | chr1:25761256-25761832 REVERSE	949.275	5025.85	5.29441	0.188878
Brapa_ESTC028676	no_hits_f	---------	397.39	2100.22	5.28503	0.189214
Brapa_ESTC049058	AT3G21620	Symbols: | early-responsive to dehydration protein-related / ERD protein-related | chr3:7611051-7614048 REVERSE	600.434	3169.34	5.27842	0.189451
Brapa_ESTC035650	AT4G21470	Symbols: ATFMN/FHY | ATFMN/FHY (RIBOFLAVIN KINASE/FMN HYDROLASE); FMN adenylyltransferase/ riboflavin kinase | chr4:11431295-11433208 FORWARD	1472.68	7749.14	5.26193	0.190044
Brapa_ESTC009632	no_hits_f	---------	481.692	2532.16	5.2568	0.19023
Brapa_ESTC030166	no_hits_f	---------	375.811	1972.63	5.24899	0.190513
Brapa_ESTC000975	AT5G14910	Symbols: | heavy-metal-associated domain-containing protein | chr5:4823818-4825199 FORWARD	2099.68	11014.7	5.24589	0.190625
Brapa_ESTC023736	AT3G54890	| Symbols: LHCA1 | LHCA1 | chr3:20350859-20351900 REVERSE	4607.67	24136.9	5.23842	0.190897
Brapa_ESTC013344	AT4G15510	Symbols: | photosystem II reaction center PsbP family protein | chr4:8860699-8862527 FORWARD	496.79	2602.29	5.23821	0.190905
Brapa_ESTC022131	AT1G68010	Symbols: HPR | HPR (Hydroxypyruvate reductase); NAD binding / cofactor binding / oxidoreductase, acting on the CH-OH group of donors, NAD or NADP as acceptor | chr1:25497081-25499383 FORWARD	3110.32	16290.4	5.23753	0.19093
Brapa_ESTC010905	AT4G20150	Symbols: | similar to unknown protein [Phytophthora infestans] (GB:AAY43427.1); similar to Os07g0498300 [Oryza sativa (japonica cultivar-group)] (GB:NP_001059709.1) | chr4:10888539-10889510 REVERSE	232.195	1215.8	5.23612	0.190981
Brapa_ESTC041221	AT2G21560	Symbols: | similar to unknown protein [Arabidopsis thaliana] (TAIR:AT4G39190.1); similar to LOC402866 protein [Danio rerio] (GB:AAH57473.1) | chr2:9237553-9238377 REVERSE	2210.78	11531.4	5.21599	0.191718
Brapa_ESTC032513	AT4G00590	Symbols: | asparaginase 2 family protein | chr4:252835-254880 FORWARD	397.713	2072.06	5.20994	0.191941
Brapa_ESTC024881	AT1G20816	Symbols: | similar to unknown protein [Arabidopsis thaliana] (TAIR:AT1G76405.2); similar to chloroplast channel forming outer membrane protein [Pisum sativum] (GB:CAB58442.1); contains domain Clavaminate synthase-like (SSF51197) | chr1:7233803-7234930 FORWARD	635.357	3306.52	5.20419	0.192153
Brapa_ESTC039004	AT4G23290	Symbols: | protein kinase family protein | chr4:12177920-12180820 REVERSE	2061.66	10705.7	5.19276	0.192576
Brapa_ESTC018980	AT1G21560	Symbols: | similar to unknown protein [Arabidopsis thaliana] (TAIR:AT4G01170.1); similar to Os04g0539100 [Oryza sativa (japonica cultivar-group)] (GB:NP_001053436.1); similar to Os05g0423200 [Oryza sativa (japonica cultivar-group)] (GB:NP_001055589.1); similar to Os04g0221000 [Oryza sativa (japonica cultivar-group)] (GB:NP_001052267.1) | chr1:7555419-7556778 FORWARD	865.453	4484.31	5.18146	0.192996
Brapa_ESTC022569	AT2G37660	Symbols: | catalytic/ coenzyme binding | chr2:15802559-15804055 REVERSE	2370.88	12269.3	5.175	0.193237
Brapa_ESTC002691	AT5G38420	Symbols: | ribulose bisphosphate carboxylase small chain 2B / RuBisCO small subunit 2B (RBCS-2B) (ATS2B) | chr5:15398433-15399208 REVERSE	2461.33	12732.5	5.17302	0.193311
Brapa_ESTC016430	AT5G53420	Symbols: | similar to unknown protein [Arabidopsis thaliana] (TAIR:AT4G27900.2); similar to CCT [Medicago truncatula] (GB:ABE82748.1); contains InterPro domain CCT; (InterPro:IPR010402) | chr5:21690909-21692695 FORWARD	1583.69	8185	5.16831	0.193487
Brapa_ESTC022564	no_hits_f	---------	308.593	1594.34	5.16648	0.193555
Brapa_ESTC045227	AT4G02405	Symbols: | similar to Protein of unknown function DUF142 [Crocosphaera watsonii WH 8501] (GB:ZP_00514760.1); similar to Os07g0247100 [Oryza sativa (japonica cultivar-group)] (GB:NP_001059287.1) | chr4:1057999-1059671 REVERSE	1599.15	8254.39	5.16174	0.193733
Brapa_ESTC010697	AT3G60370	Symbols: | immunophilin / FKBP-type peptidyl-prolyl cis-trans isomerase family protein | chr3:22325975-22327508 REVERSE	956.059	4921.05	5.14722	0.194279
Brapa_ESTC026168	AT2G30170	| Symbols: | catalytic | chr2:12886879-12888123 REVERSE	456.525	2348.72	5.14478	0.194372
Brapa_ESTC034686	no_hits_f	---------	254.155	1304.79	5.13384	0.194786
Brapa_ESTC023498	AT1G18650	Symbols: | glycosyl hydrolase family protein 17 | chr1:6419028-6420405 REVERSE	372.238	1910.95	5.13368	0.194792
Brapa_ESTC023666	AT5G40160	Symbols: EMB506 | EMB506 (EMBRYO DEFECTIVE 506); protein binding | chr5:16079954-16081529 REVERSE	1498.35	7682	5.12697	0.195047
Brapa_ESTC003785	AT3G21055	Symbols: PSBTN | PSBTN (photosystem II subunit T) | chr3:7376767-7377078 REVERSE	5633.84	28839.1	5.11891	0.195354
Brapa_ESTC041905	AT2G41905	Symbols: | similar to AGP23 (ARABINOGALACTAN-PROTEIN 23) [Arabidopsis thaliana] (TAIR:AT3G57690.1); similar to pollen-specific arabinogalacta protein BAN102 [Brassica rapa] (GB:AAD21078.2) | chr2:17502844-17503029 FORWARD	290.62	1487.47	5.11826	0.195379
Brapa_ESTC002496	AT1G03870	| Symbols: FLA9 | FLA9 (FLA9) | chr1:982624-983367 REVERSE	637.609	3261.84	5.11574	0.195475
Brapa_ESTC013437	AT3G16800	Symbols: | protein phosphatase 2C, putative / PP2C, putative | chr3:5721300-5722929 FORWARD	3585.85	18319.8	5.10891	0.195736
Brapa_ESTC044206	AT4G18740	Symbols: | transcription termination factor | chr4:10303554-10304490 REVERSE	929.157	4743.06	5.10469	0.195898
Brapa_ESTC028105	AT3G22415	| Symbols: | unknown protein | chr3:7941344-7941547 FORWARD	199.88	1019.4	5.10006	0.196076
Brapa_ESTC049886	no_hits_f	---------	1050.78	5356.33	5.09748	0.196175
Brapa_ESTC049466	no_hits_f	---------	486.488	2478.07	5.09379	0.196317
Brapa_ESTC042012	no_hits_f	---------	289.601	1469.17	5.07308	0.197119
Brapa_ESTC041949	AT2G41950	Symbols: | similar to Os03g0226700 [Oryza sativa (japonica cultivar-group)] (GB:NP_001049441.1); similar to Methyltransferase type 11 [Syntrophobacter fumaroxidans MPOB] (GB:YP_847674.1); contains domain Hypothetical protein MTH1020 (SSF75569) | chr2:17520215-17521107 FORWARD	599.819	3042.08	5.07166	0.197174
Brapa_ESTC042549	AT3G04300	Symbols: | similar to unknown protein [Arabidopsis thaliana] (TAIR:AT4G10300.1); similar to Cupin, RmlC-type [Medicago truncatula] (GB:ABE82642.1); contains InterPro domain Protein of unknown function DUF861, cupin_3; (InterPro:IPR008579); contains InterPro domain Cupin, RmlC-type; (InterPro:IPR011051) | chr3:1140325-1140730 FORWARD	618.176	3129.41	5.06233	0.197538
Brapa_ESTC043124	AT5G62830	Symbols: | F-box family protein-related | chr5:25243394-25244008 REVERSE	278.206	1407.42	5.05891	0.197671
Brapa_ESTC019099	AT3G02875	Symbols: ILR1 | ILR1 (IAA-LEUCINE RESISTANT 1); metallopeptidase | chr3:632000-633866 FORWARD	3193.6	16148.2	5.05643	0.197768
Brapa_ESTC002203	AT3G60820	Symbols: PBF1 | PBF1 (20S proteasome beta subunit F1); peptidase | chr3:22483013-22484784 REVERSE	890.418	4502.04	5.0561	0.197781
Brapa_ESTC003054	AT3G25690	Symbols: CHUP1 | CHUP1 (CHLOROPLAST UNUSUAL POSITIONING 1) | chr3:9355298-9358994 FORWARD	840.738	4246.95	5.05145	0.197963
Brapa_ESTC002622	AT4G08700	Symbols: ATPUP13 | ATPUP13 (Arabidopsis thaliana purine permease 13); purine transporter | chr4:5565995-5567283 REVERSE	285.979	1444.16	5.04988	0.198024
Brapa_ESTC040751	AT1G75250	Symbols: | myb family transcription factor | chr1:28248124-28249114 REVERSE	2426.15	12248.5	5.04853	0.198077
Brapa_ESTC035409	AT3G53580	Symbols: | diaminopimelate epimerase family protein | chr3:19875762-19877885 FORWARD	1436.36	7250.06	5.04752	0.198117
Brapa_ESTC013197	AT5G44600	Symbols: | similar to unknown protein [Arabidopsis thaliana] (TAIR:AT5G44590.1); similar to expressed protein [Oryza sativa (japonica cultivar-group)] (GB:ABF93757.1); contains domain no description (G3D.3.40.50.150); contains domain S-adenosyl-L-methionine-dependent methyltransferases (SSF53335) | chr5:18007094-18008746 FORWARD	429.172	2165.36	5.04544	0.198199
Brapa_ESTC012229	AT3G59280	Symbols: TXR1 | TXR1 (THAXTOMIN A RESISTANT 1) | chr3:21920243-21921496 REVERSE	265.909	1340.79	5.04229	0.198323
Brapa_ESTC026969	AT5G63220	Symbols: | similar to Protein of unknown function (DUF410) [Medicago truncatula] (GB:ABE77873.1); contains InterPro domain Protein of unknown function DUF410; (InterPro:IPR007317) | chr5:25370482-25372636 REVERSE	1463.09	7371.68	5.03843	0.198474
Brapa_ESTC033750	AT2G15970	Symbols: WCOR413, WCOR413-LIKE, ATCOR413-PM1, FL3-5A3, COR413-PM1 | COR413-PM1 (cold regulated 413 plasma membrane 1) | chr2:6957245-6958094 FORWARD	6188.41	31108.6	5.02691	0.198929
Brapa_ESTC049777	AT1G78630	Symbols: EMB1473 | EMB1473 (EMBRYO DEFECTIVE 1473); structural constituent of ribosome | chr1:29580890-29582299 FORWARD	286.018	1436.99	5.02412	0.19904
Brapa_ESTC000996	AT5G13360	Symbols: | auxin-responsive GH3 family protein | chr5:4283808-4286123 FORWARD	895.473	4498.75	5.02388	0.199049
Brapa_ESTC022051	AT1G74690	Symbols: IQD31 | IQD31 (IQ-domain 31); calmodulin binding | chr1:28065159-28067585 REVERSE	1211.06	6082.07	5.0221	0.19912
Brapa_ESTC025537	AT5G08640	Symbols: FLS | FLS (FLAVONOL SYNTHASE) | chr5:2804010-2805176 FORWARD	205.626	1032.12	5.0194	0.199227
Brapa_ESTC014420	AT1G53800	| Symbols: | endonuclease | chr1:20085556-20087988 FORWARD	1424.13	7138.27	5.01237	0.199506
Brapa_ESTC005985	AT2G36430	Symbols: | similar to unknown protein [Arabidopsis thaliana] (TAIR:AT5G22540.1); similar to hypothetical protein [Oryza sativa (japonica cultivar-group)] (GB:BAD45208.1); similar to Os04g0505400 [Oryza sativa (japonica cultivar-group)] (GB:NP_001053253.1); contains InterPro domain Protein of unknown function DUF247, plant; (InterPro:IPR004158) | chr2:15297290-15298636 FORWARD	1921.05	9620.32	5.00784	0.199687
Brapa_ESTC048651	no_hits_f	---------	330.242	1652.59	5.00418	0.199833
Brapa_ESTC019748	AT1G48100	Symbols: | glycoside hydrolase family 28 protein / polygalacturonase (pectinase) family protein | chr1:17770590-17773294 FORWARD	3164.65	15834.2	5.00346	0.199862
Brapa_ESTC013012	AT5G17620	Symbols: | similar to nuclear matrix protein 1 [Lycopersicon esculentum] (GB:AAK83083.1); contains InterPro domain Plant nuclear matrix 1; (InterPro:IPR010604) | chr5:5805936-5808457 REVERSE	1762.29	8807.87	4.99797	0.200081
Brapa_ESTC012651	AT1G07450	Symbols: | tropinone reductase, putative / tropine dehydrogenase, putative | chr1:2288035-2289253 REVERSE	1803.41	9004.81	4.99321	0.200272
Brapa_ESTC032471	AT2G24762	Symbols: | similar to GDU1 (GLUTAMINE DUMPER 1) [Arabidopsis thaliana] (TAIR:AT4G31730.1); similar to At5g57685 [Medicago truncatula] (GB:ABE81292.1) | chr2:10566558-10567028 FORWARD	700.446	3496.99	4.99252	0.2003
Brapa_ESTC049059	no_hits_f	---------	910.258	4544.23	4.99224	0.200311
Brapa_ESTC030318	AT3G25690	Symbols: CHUP1 | CHUP1 (CHLOROPLAST UNUSUAL POSITIONING 1) | chr3:9355298-9358994 FORWARD	2766.06	13790.7	4.98568	0.200574
Brapa_ESTC037691	AT1G09290	Symbols: | similar to Os02g0672400 [Oryza sativa (japonica cultivar-group)] (GB:NP_001047705.1); contains domain FAD/NAD-linked reductases, dimerisation (C-terminal) domain (SSF55424) | chr1:3001684-3003717 REVERSE	1027.44	5119.22	4.9825	0.200702
Brapa_ESTC012715	AT5G52900	Symbols: | similar to hypothetical protein MtrDRAFT_AC150980g17v1 [Medicago truncatula] (GB:ABE87114.1) | chr5:21470119-21470918 REVERSE	881.861	4392.52	4.98097	0.200764
Brapa_ESTC010858	AT5G40240	Symbols: | nodulin MtN21 family protein | chr5:16099553-16101694 REVERSE	1214.39	6048.28	4.98051	0.200783
Brapa_ESTC049789	no_hits_f	---------	205.678	1023.91	4.97822	0.200875
Brapa_ESTC016233	AT1G11330	Symbols: | S-locus lectin protein kinase family protein | chr1:3810372-3813416 FORWARD	296.793	1476.23	4.97394	0.201048
Brapa_ESTC017345	AT4G36800	Symbols: RCE1 | RCE1 (RUB1 CONJUGATING ENZYME 1); small protein conjugating enzyme | chr4:17341533-17342152 REVERSE	2838.64	14099.3	4.96692	0.201332
Brapa_ESTC008318	AT5G61130	Symbols: | glycosyl hydrolase family protein 17 | chr5:24604664-24606595 REVERSE	1595.79	7923.73	4.9654	0.201394
Brapa_ESTC009884	AT2G46090	Symbols: | diacylglycerol kinase family protein | chr2:18957992-18960152 FORWARD	273.843	1358.4	4.96051	0.201592
Brapa_ESTC038616	AT2G36760	Symbols: UGT73C2 | UGT73C2 (UDP-glucosyl transferase 73C2); UDP-glycosyltransferase/ transferase, transferring glycosyl groups / transferase, transferring hexosyl groups | chr2:15420121-15421611 REVERSE	1914.93	9491.47	4.95656	0.201753
Brapa_ESTC026007	AT4G25780	Symbols: | pathogenesis-related protein, putative | chr4:13121116-13121688 FORWARD	2687.58	13308.7	4.95193	0.201942
Brapa_ESTC027499	AT1G11720	Symbols: ATSS3 | ATSS3 (STARCH SYNTHASE 3); starch synthase/ transferase, transferring glycosyl groups | chr1:3952511-3956840 FORWARD	846.99	4191.61	4.94883	0.202068
Brapa_ESTC019072	AT3G61610	Symbols: | aldose 1-epimerase family protein | chr3:22810455-22812004 FORWARD	594.971	2944.1	4.94831	0.202089
Brapa_ESTC006090	AT3G29185	Symbols: | similar to hypothetical protein MtrDRAFT_AC147482g2v1 [Medicago truncatula] (GB:ABD32485.1) | chr3:11156329-11158444 REVERSE	720.23	3563.52	4.94775	0.202112
Brapa_ESTC000633	AT4G18370	Symbols: DEGP5, HHOA | HHOA (DEGP PROTEASE 5); serine-type peptidase/ trypsin | chr4:10149246-10151062 FORWARD	347.084	1716.95	4.94679	0.202151
Brapa_ESTC035349	AT5G17700	Symbols: | MATE efflux family protein | chr5:5831027-5833417 REVERSE	254.241	1257.08	4.94444	0.202247
Brapa_ESTC023739	AT5G41750	Symbols: | disease resistance protein (TIR-NBS-LRR class), putative | chr5:16711275-16714755 FORWARD	526.873	2602.28	4.9391	0.202466
Brapa_ESTC047377	AT2G23460	Symbols: ATXLG1, XLG1 | XLG1 (EXTRA-LARGE G-PROTEIN 1); signal transducer | chr2:10002779-10006025 FORWARD	3649.51	18022.5	4.93833	0.202497
Brapa_ESTC000829	no_hits_f	---------	2432.21	11990.5	4.92988	0.202845
Brapa_ESTC011432	AT4G32295	Symbols: | similar to unknown protein [Arabidopsis thaliana] (TAIR:AT3G24150.1); contains domain Kix domain of CBP (creb binding protein) (SSF47040) | chr4:15592966-15594086 FORWARD	288.731	1422.05	4.92517	0.203039
Brapa_ESTC010065	AT2G16365	| Symbols: | F-box family protein | chr2:7082022-7083471 FORWARD	326.199	1606.47	4.92482	0.203053
Brapa_ESTC000908	AT1G03630	Symbols: PORC, POR C | POR C (PROTOCHLOROPHYLLIDE OXIDOREDUCTASE); oxidoreductase/ protochlorophyllide reductase | chr1:907698-909244 FORWARD	1444.34	7105.91	4.91983	0.203259
Brapa_ESTC023059	AT4G18740	Symbols: | contains domain Rho termination factor, N-terminal domain (SSF68912) | chr4:10303554-10304490 REVERSE	469.748	2310.79	4.91921	0.203285
Brapa_ESTC010318	AT4G04635	Symbols: | DNA binding / transposase | chr4:2347901-2349154 FORWARD	1064.19	5234.49	4.91876	0.203303
Brapa_ESTC023438	AT3G29320	Symbols: | glucan phosphorylase, putative | chr3:11254108-11258824 FORWARD	286.342	1408.18	4.91783	0.203342
Brapa_ESTC015943	AT4G21190	Symbols: EMB1417 | EMB1417 (EMBRYO DEFECTIVE 1417) | chr4:11292503-11293773 REVERSE	3836.33	18855.3	4.91493	0.203462
Brapa_ESTC005176	AT1G20816	Symbols: | similar to unknown protein [Arabidopsis thaliana] (TAIR:AT1G76405.2); similar to chloroplast channel forming outer membrane protein [Pisum sativum] (GB:CAB58442.1); contains domain Clavaminate synthase-like (SSF51197) | chr1:7233803-7234930 FORWARD	1107.5	5442.27	4.91401	0.2035
Brapa_ESTC001205	AT4G32120	Symbols: | galactosyltransferase family protein | chr4:15517236-15519693 REVERSE	916.159	4501.7	4.91367	0.203514
Brapa_ESTC027406	AT4G04850	Symbols: ATKEA3, KEA3 | KEA3 (K+ efflux antiporter 3); potassium:hydrogen antiporter | chr4:2453911-2456889 FORWARD	2800.28	13750	4.91022	0.203657
Brapa_ESTC019585	AT1G16020	Symbols: | similar to unknown protein [Arabidopsis thaliana] (TAIR:AT1G80910.1); similar to Os08g0427300 [Oryza sativa (japonica cultivar-group)] (GB:NP_001061842.1); similar to myrosinase precursor [Brassica oleracea] (GB:AAL67437.1); contains domain FAMILY NOT NAMED (PTHR13056); contains domain SUBFAMILY NOT NAMED (PTHR13056:SF2) | chr1:5498627-5501012 FORWARD	1828.1	8966.59	4.90487	0.203879
Brapa_ESTC005105	AT2G30490	Symbols: ATC4H, C4H, CYP73A5 | ATC4H (CINNAMATE-4-HYDROXYLASE) | chr2:13000938-13002760 REVERSE	349.31	1712.98	4.9039	0.203919
Brapa_ESTC001121	AT1G48100	Symbols: | glycoside hydrolase family 28 protein / polygalacturonase (pectinase) family protein | chr1:17770590-17773294 FORWARD	4416.85	21645.9	4.90076	0.20405
Brapa_ESTC026656	AT4G37220	Symbols: | stress-responsive protein, putative | chr4:17515100-17515963 FORWARD	2381.65	11666.2	4.89837	0.20415
Brapa_ESTC021328	AT3G47560	Symbols: | esterase/lipase/thioesterase family protein | chr3:17536560-17537962 REVERSE	1492.56	7308.31	4.89649	0.204228
Brapa_ESTC015660	AT1G77660	Symbols: | MORN (Membrane Occupation and Recognition Nexus) repeat-containing protein /phosphatidylinositol-4-phosphate 5-kinase-related | chr1:29190967-29192394 REVERSE	488.401	2389.51	4.89252	0.204394
Brapa_ESTC022989	AT1G14280	Symbols: PKS2 | PKS2 (PHYTOCHROME KINASE SUBSTRATE 2) | chr1:4877652-4878980 FORWARD	1204.44	5881.47	4.88316	0.204786
Brapa_ESTC050532	AT3G02470	Symbols: SAMDC | SAMDC (S-ADENOSYLMETHIONINE DECARBOXYLASE) | chr3:510230-511330 FORWARD	548.609	2676.25	4.87825	0.204992
Brapa_ESTC002315	AT1G10640	Symbols: | polygalacturonase, putative / pectinase, putative | chr1:3515479-3516932 REVERSE	310.904	1516.3	4.87707	0.205041
Brapa_ESTC009478	AT2G01870	| Symbols: | unknown protein | chr2:389845-390318 REVERSE	242.471	1179.03	4.86256	0.205653
Brapa_ESTC011282	no_hits_f	---------	1469.65	7143.34	4.86057	0.205737
Brapa_ESTC027260	AT3G48610	Symbols: | phosphoesterase family protein | chr3:18022638-18024944 REVERSE	349.841	1700.14	4.85975	0.205772
Brapa_ESTC016485	AT2G27190	Symbols: ATPAP1, PAP12, ATPAP12, PAP1 | PAP1 (PURPLE ACID PHOSPHATASE 1); acid phosphatase/ protein serine/threonine phosphatase | chr2:11628478-11630516 REVERSE	1166.43	5663.89	4.85575	0.205941
Brapa_ESTC022958	AT1G34380	Symbols: | 5'-3' exonuclease family protein | chr1:12553275-12554277 REVERSE	3381.63	16415.4	4.85429	0.206004
Brapa_ESTC050825	no_hits_f	---------	276.38	1341.51	4.85386	0.206022
Brapa_ESTC044173	AT4G18975	Symbols: | pentatricopeptide (PPR) repeat-containing protein | chr4:10392181-10393676 REVERSE	536.1	2601.43	4.85251	0.206079
Brapa_ESTC023633	AT5G53580	Symbols: | aldo/keto reductase family protein | chr5:21782441-21784145 REVERSE	1632.04	7919.34	4.85242	0.206083
Brapa_ESTC008249	AT1G50430	Symbols: PA, LE, ST7R, 7RED, DWF5 | DWF5 (DWARF 5); sterol delta7 reductase | chr1:18685843-18689223 REVERSE	1471.11	7135.07	4.85013	0.20618
Brapa_ESTC011889	AT2G21280	Symbols: ATSULA, GC1 | GC1 (GIANT CHLOROPLAST 1); catalytic/ coenzyme binding | chr2:9117583-9119760 REVERSE	260.884	1264.16	4.84568	0.206369
Brapa_ESTC022312	AT1G56050	Symbols: | GTP-binding protein-related | chr1:20967458-20969846 FORWARD	2260.62	10954.2	4.84566	0.20637
Brapa_ESTC027235	AT1G56050	Symbols: | GTP-binding protein-related | chr1:20967458-20969846 FORWARD	1405.57	6810.58	4.84542	0.20638
Brapa_ESTC051029	AT1G49950	Symbols: ATTRB1, TRB1 | ATTRB1/TRB1 (TELOMERE REPEAT BINDING FACTOR 1); DNA binding / transcription factor | chr1:18498107-18500381 REVERSE	395.765	1917.6	4.8453	0.206386
Brapa_ESTC051921	no_hits_f	---------	2242.74	10847.9	4.8369	0.206744
Brapa_ESTC003446	AT3G21055	Symbols: PSBTN | PSBTN (photosystem II subunit T) | chr3:7376767-7377078 REVERSE	8513.59	41166.6	4.8354	0.206808
Brapa_ESTC048299	AT2G23460	Symbols: ATXLG1, XLG1 | XLG1 (EXTRA-LARGE G-PROTEIN 1); signal transducer | chr2:10002779-10006025 FORWARD	3670.26	17743.6	4.83443	0.20685
Brapa_ESTC000267	AT2G17975	Symbols: | zinc finger (Ran-binding) family protein | chr2:7829320-7831052 REVERSE	752.256	3631.54	4.82753	0.207145
Brapa_ESTC013352	AT3G01410	Symbols: | RNase H domain-containing protein | chr3:153657-155446 REVERSE	1280.58	6174.65	4.82176	0.207393
Brapa_ESTC013461	AT4G28590	Symbols: | similar to unknown protein [Arabidopsis thaliana] (TAIR:AT2G31840.1); similar to Cecropin [Medicago truncatula] (GB:ABE79077.1); contains InterPro domain Thioredoxin-like fold; (InterPro:IPR012336); contains InterPro domain Thioredoxin fold; (InterPro:IPR012335) | chr4:14125373-14126834 REVERSE	951.885	4587.96	4.81987	0.207475
Brapa_ESTC017991	AT2G06925	Symbols: ATSPLA2-ALPHA, PLA2-ALPHA | ATSPLA2-ALPHA/PLA2-ALPHA (PHOSPHOLIPASE A2-ALPHA); phospholipase A2 | chr2:2842472-2843209 REVERSE	3719.5	17925.2	4.81925	0.207501
Brapa_ESTC003285	no_hits_f	---------	218.414	1052.14	4.81718	0.20759
Brapa_ESTC012154	AT2G35500	Symbols: | shikimate kinase-related | chr2:14921117-14922988 FORWARD	506.159	2436.28	4.81327	0.207759
Brapa_ESTC023744	AT3G59040	Symbols: | pentatricopeptide (PPR) repeat-containing protein | chr3:21832472-21835210 REVERSE	221.117	1063.95	4.81171	0.207826
Brapa_ESTC013641	AT5G55280	Symbols: ATFTSZ1-1, CPFTSZ, FTSZ1-1 | FTSZ1-1 (FtsZ1-1); structural molecule | chr5:22437966-22439753 REVERSE	1990.68	9577.88	4.81136	0.207841
Brapa_ESTC002634	AT3G62600	Symbols: | DNAJ heat shock family protein | chr3:23162014-23164322 REVERSE	1297.59	6236.18	4.80597	0.208074
Brapa_ESTC027604	AT3G26460	Symbols: | major latex protein-related / MLP-related | chr3:9685290-9685844 REVERSE	846.165	4064.7	4.80367	0.208174
Brapa_ESTC040633	AT1G77990	Symbols: SULTR2;2, AST56 | AST56 (sulphate transporter 2;2); sulfate transporter | chr1:29322859-29328143 REVERSE	415.015	1991.24	4.798	0.20842
Brapa_ESTC014734	AT1G69420	Symbols: | zinc finger (DHHC type) family protein | chr1:26097353-26100399 FORWARD	2287.24	10968.2	4.79539	0.208534
Brapa_ESTC015106	AT1G54650	Symbols: | similar to unknown protein [Arabidopsis thaliana] (TAIR:AT2G26200.1); similar to Os07g0414200 [Oryza sativa (japonica cultivar-group)] (GB:NP_001059456.1); similar to PREDICTED: hypothetical protein isoform 1 [Gallus gallus] (GB:XP_001235215.1); contains InterPro domain Methyltransferase type 12; (InterPro:IPR013217); contains InterPro domain SAM (and some other nucleotide) binding mot…	274.454	1315.93	4.79472	0.208563
Brapa_ESTC033819	AT4G24780	Symbols: | pectate lyase family protein | chr4:12770641-12772237 REVERSE	3448.3	16531.2	4.79401	0.208593
Brapa_ESTC001078	AT1G35340	Symbols: | ATP-dependent protease La (LON) domain-containing protein | chr1:12977746-12979727 FORWARD	573.514	2749.17	4.79355	0.208614
Brapa_ESTC043386	AT3G27050	Symbols: | similar to expressed protein [Oryza sativa (japonica cultivar-group)] (GB:ABA93800.1) | chr3:9979523-9980873 REVERSE	3508.8	16816.7	4.79272	0.20865
Brapa_ESTC003053	AT5G24314	Symbols: PDE225, PTAC7 | PDE225/PTAC7 (PIGMENT DEFECTIVE 225) | chr5:8277753-8279102 FORWARD	2701.72	12941.1	4.78995	0.208771
Brapa_ESTC021267	AT3G11945	| Symbols: | prenyltransferase | chr3:3780047-3782886 REVERSE	3256.11	15583.7	4.78599	0.208943
Brapa_ESTC015459	AT5G17870	Symbols: PSRP6 | plastid-specific ribosomal protein-related | chr5:5907819-5908139 FORWARD	2262.35	10816.1	4.78091	0.209165
Brapa_ESTC036753	AT4G23670	Symbols: | major latex protein-related / MLP-related | chr4:12332856-12333666 REVERSE	1402.78	6694.71	4.77246	0.209536
Brapa_ESTC041002	AT5G28237	Symbols: | tryptophan synthase, beta subunit, putative | chr5:10207481-10213546 REVERSE	905.588	4319.38	4.7697	0.209657
Brapa_ESTC021264	AT5G66550	| Symbols: | Maf family protein | chr5:26576978-26578388 REVERSE	445.203	2120.28	4.7625	0.209974
Brapa_ESTC022619	AT1G44760	Symbols: | universal stress protein (USP) family protein | chr1:16899334-16900867 REVERSE	266.727	1269.28	4.75872	0.21014
Brapa_ESTC017047	AT5G15930	Symbols: PAM1 | PAM1 (PLANT ADHESION MOLECULE 1); RAB GTPase activator | chr5:5200332-5202253 FORWARD	440.535	2095.95	4.75774	0.210184
Brapa_ESTC047297	AT1G49950	Symbols: ATTRB1, TRB1 | ATTRB1/TRB1 (TELOMERE REPEAT BINDING FACTOR 1); DNA binding / transcription factor | chr1:18498107-18500381 REVERSE	399.996	1902.13	4.75537	0.210288
Brapa_ESTC020567	AT3G07200	Symbols: | protein binding / zinc ion binding | chr3:2291349-2292229 FORWARD	805.458	3827.43	4.75187	0.210444
Brapa_ESTC042595	no_hits_f	---------	271.029	1287.73	4.75126	0.21047
Brapa_ESTC011883	AT2G36430	Symbols: | similar to unknown protein [Arabidopsis thaliana] (TAIR:AT5G22540.1); similar to hypothetical protein [Oryza sativa (japonica cultivar-group)] (GB:BAD45208.1); similar to Os04g0505400 [Oryza sativa (japonica cultivar-group)] (GB:NP_001053253.1); contains InterPro domain Protein of unknown function DUF247, plant; (InterPro:IPR004158) | chr2:15297290-15298636 FORWARD	2530.83	12022.8	4.75054	0.210503
Brapa_ESTC010525	AT5G17150	Symbols: | similar to unknown protein [Arabidopsis thaliana] (TAIR:AT5G17120.1); contains InterPro domain Arabidopsis thaliana cystatin-related protein; (InterPro:IPR006525) | chr5:5638872-5639594 REVERSE	849.047	4033.08	4.75013	0.210521
Brapa_ESTC042175	AT2G47760	| Symbols: | catalytic | chr2:19573003-19575291 REVERSE	819.139	3886.11	4.74414	0.210786
Brapa_ESTC006955	AT3G25690	Symbols: CHUP1 | CHUP1 (CHLOROPLAST UNUSUAL POSITIONING 1) | chr3:9355298-9358994 FORWARD	551.179	2602.56	4.72181	0.211783
Brapa_ESTC029917	AT3G25860	Symbols: PLE2, LTA2 | LTA2 (PLASTID E2 SUBUNIT OF PYRUVATE DECARBOXYLASE); dihydrolipoyllysine-residue acetyltransferase | chr3:9461869-9463822 FORWARD	224.083	1057.99	4.72142	0.211801
Brapa_ESTC051102	no_hits_f	---------	396.768	1873.14	4.721	0.21182
Brapa_ESTC048791	no_hits_f	---------	1226.64	5777.48	4.71	0.212314
Brapa_ESTC008695	AT1G51560	| Symbols: | FMN binding | chr1:19123568-19125527 REVERSE	1057.69	4980.88	4.70921	0.21235
Brapa_ESTC048300	AT2G23460	Symbols: ATXLG1, XLG1 | XLG1 (EXTRA-LARGE G-PROTEIN 1); signal transducer | chr2:10002779-10006025 FORWARD	235.573	1108.83	4.70695	0.212452
Brapa_ESTC022157	AT4G18480	Symbols: CH42, CH-42, CHL11, CHLI-1, CHLI1 | CHLI1 (CHLORINA 42); magnesium chelatase | chr4:10201908-10203372 REVERSE	2839.79	13365.8	4.70662	0.212467
Brapa_ESTC026302	AT1G11380	Symbols: | similar to unknown protein [Arabidopsis thaliana] (TAIR:AT5G05350.1); similar to Uncharacterized Cys-rich domain [Medicago truncatula] (GB:ABD32347.1); contains InterPro domain Protein of unknown function Cys-rich; (InterPro:IPR006461) | chr1:3832695-3833921 FORWARD	328.084	1541.35	4.69803	0.212855
Brapa_ESTC029478	AT2G37240	Symbols: | Identical to UPF0308 protein At2g37240, chloroplast precursor [Arabidopsis Thaliana] (GB:Q9ZUU2;GB:Q94A62); similar to unknown protein [Arabidopsis thaliana] (TAIR:AT5G65840.1); similar to Os03g0284600 [Oryza sativa (japonica cultivar-group)] (GB:NP_001049763.1); similar to PREDICTED: similar to TPA_exp: C9ORF21 isoform 2 [Pan troglodytes] (GB:XP_520707.2); similar to Os03g0729200 [Ory…	3019.19	14179.2	4.69636	0.212931
Brapa_ESTC002591	no_hits_f	---------	4511.91	21174.5	4.69302	0.213082
Brapa_ESTC013340	AT2G39440	Symbols: | similar to unknown protein [Arabidopsis thaliana] (TAIR:AT1G61280.1); similar to hypothetical protein MtrDRAFT_AC126784g11v2 [Medicago truncatula] (GB:ABE94681.1); contains InterPro domain PIG-P; (InterPro:IPR013717) | chr2:16471884-16477549 REVERSE	704.61	3301.83	4.68604	0.2134
Brapa_ESTC023627	AT5G41140	Symbols: | similar to unknown protein [Arabidopsis thaliana] (TAIR:AT1G63300.1); similar to putative myosin [Oryza sativa (japonica cultivar-group)] (GB:AAO72668.1); contains domain no description (G3D.1.20.5.170); contains domain MYOSIN HEAVY CHAIN-RELATED (PTHR23160); contains domain Tubulin chaperone cofactor A (SSF46988) | chr5:16485954-16489774 FORWARD	1092.7	5115.56	4.68158	0.213603
Brapa_ESTC011166	no_hits_f	---------	1189.71	5564.2	4.67694	0.213815
Brapa_ESTC003280	AT1G76020	Symbols: | similar to unknown protein [Arabidopsis thaliana] (TAIR:AT1G20225.1); similar to unknown [Solanum tuberosum] (GB:ABB55396.1); contains InterPro domain Thioredoxin-like fold; (InterPro:IPR012336); contains InterPro domain Thioredoxin fold; (InterPro:IPR012335) | chr1:28535904-28537203 REVERSE	573.874	2683.95	4.6769	0.213817
Brapa_ESTC049291	no_hits_f	---------	987.991	4615.45	4.67155	0.214062
Brapa_ESTC026324	AT1G21440	| Symbols: | mutase family protein | chr1:7502314-7504092 REVERSE	1127.27	5257.48	4.6639	0.214413
Brapa_ESTC051431	AT5G59350	Symbols: | similar to unknown protein [Arabidopsis thaliana] (TAIR:AT2G39560.1); similar to hypothetical protein MtrDRAFT_AC146757g30v1 [Medicago truncatula] (GB:ABE90639.1) | chr5:23958358-23959221 FORWARD	273.284	1274.13	4.66229	0.214487
Brapa_ESTC026862	AT2G38760	Symbols: ANNAT3 | ANNAT3 (ANNEXIN 3, ANNEXIN ARABIDOPSIS 3); calcium ion binding / calcium-dependent phospholipid binding | chr2:16208164-16209568 FORWARD	1318.01	6144.88	4.66224	0.214489
Brapa_ESTC017208	AT3G54890	| Symbols: LHCA1 | LHCA1 | chr3:20350859-20351900 REVERSE	2763.8	12883	4.66134	0.214531
Brapa_ESTC011364	AT1G22630	Symbols: | similar to Os05g0105800 [Oryza sativa (japonica cultivar-group)] (GB:NP_001054413.1); contains domain Cysteine-rich domain of the chaperone protein DnaJ. (SSF57938) | chr1:8003476-8004156 FORWARD	1515.77	7056.76	4.65556	0.214797
Brapa_ESTC011790	AT2G30670	Symbols: | tropinone reductase, putative / tropine dehydrogenase, putative | chr2:13076390-13077981 REVERSE	2160.59	10057.7	4.65507	0.214819
Brapa_ESTC026882	AT3G25810	Symbols: | myrcene/ocimene synthase, putative | chr3:9432042-9435081 FORWARD	581.66	2707.4	4.65461	0.214841
Brapa_ESTC009978	AT5G41140	Symbols: | similar to unknown protein [Arabidopsis thaliana] (TAIR:AT1G63300.1); similar to putative myosin [Oryza sativa (japonica cultivar-group)] (GB:AAO72668.1); contains domain no description (G3D.1.20.5.170); contains domain MYOSIN HEAVY CHAIN-RELATED (PTHR23160); contains domain Tubulin chaperone cofactor A (SSF46988) | chr5:16485954-16489774 FORWARD	1873.47	8718.31	4.65356	0.214889
Brapa_ESTC047205	no_hits_f	---------	273.156	1270.62	4.65163	0.214979
Brapa_ESTC003237	AT3G20870	Symbols: | metal transporter family protein | chr3:7309505-7312482 REVERSE	2170.52	10088.3	4.64787	0.215152
Brapa_ESTC006182	AT5G57030	Symbols: LUT2 | LUT2 (LUTEIN DEFICIENT 2); lycopene epsilon cyclase | chr5:23094624-23097044 FORWARD	1044.86	4856.05	4.64756	0.215167
Brapa_ESTC038327	AT3G62600	Symbols: | DNAJ heat shock family protein | chr3:23162014-23164322 REVERSE	3020.04	14033.5	4.64679	0.215202
Brapa_ESTC040350	AT1G68030	Symbols: | PHD finger protein-related | chr1:25504041-25505207 REVERSE	378.759	1759.58	4.64565	0.215255
Brapa_ESTC002594	AT2G31380	Symbols: STH | STH (salt tolerance homologue); transcription factor/ zinc ion binding | chr2:13389227-13390379 FORWARD	5688.65	26422.7	4.64481	0.215294
Brapa_ESTC015531	AT1G51100	Symbols: | similar to Os01g0676200 [Oryza sativa (japonica cultivar-group)] (GB:NP_001043849.1) | chr1:18938010-18938645 FORWARD	3631.73	16847.8	4.63906	0.215561
Brapa_ESTC025522	AT5G66190	Symbols: ATLFNR1 | ATLFNR1 (LEAF FNR 1); NADPH dehydrogenase/ oxidoreductase | chr5:26468429-26470238 REVERSE	9215.84	42684.7	4.63167	0.215905
Brapa_ESTC023760	AT4G27830	Symbols: | glycosyl hydrolase family 1 protein | chr4:13861800-13864495 REVERSE	970.621	4481.07	4.6167	0.216605
Brapa_ESTC045417	AT5G06440	Symbols: | similar to unknown protein [Arabidopsis thaliana] (TAIR:AT3G11720.2); similar to expressed protein [Oryza sativa (japonica cultivar-group)] (GB:ABA94317.2); contains domain Bet v1-like (SSF55961); contains domain no description (G3D.3.30.530.20) | chr5:1964642-1966808 REVERSE	1839.77	8491.89	4.61573	0.21665
Brapa_ESTC019766	AT3G62030	Symbols: ROC4 | ROC4 (rotamase CyP 4); peptidyl-prolyl cis-trans isomerase | chr3:22984683-22986114 FORWARD	5529.47	25508.5	4.61319	0.21677
Brapa_ESTC013267	AT1G04940	Symbols: TIC20 | TIC20; protein translocase | chr1:1399587-1400615 FORWARD	2934.97	13536.1	4.61201	0.216825
Brapa_ESTC001720	AT3G50210	| Symbols: | oxidoreductase | chr3:18625320-18627211 REVERSE	1104.55	5092.22	4.61022	0.216909
Brapa_ESTC001723	AT3G56650	Symbols: | thylakoid lumenal 20 kDa protein | chr3:20995786-20996892 FORWARD	554.821	2557.53	4.60965	0.216936
Brapa_ESTC030694	AT5G14910	Symbols: | heavy-metal-associated domain-containing protein | chr5:4823818-4825199 FORWARD	3374.17	15548.4	4.60807	0.217011
Brapa_ESTC025311	AT1G73655	Symbols: | immunophilin / FKBP-type peptidyl-prolyl cis-trans isomerase family protein | chr1:27694129-27695442 REVERSE	974.656	4488.82	4.60554	0.21713
Brapa_ESTC030177	AT4G37490	Symbols: CYCB1;1, CYCB1, CYC1 | CYC1 (CYCLIN 1); cyclin-dependent protein kinase regulator | chr4:17622123-17624202 REVERSE	1164.67	5363.82	4.60544	0.217134
Brapa_ESTC005338	AT1G30380	Symbols: PSAK | PSAK (PHOTOSYSTEM I SUBUNIT K) | chr1:10722307-10722995 FORWARD	3401.61	15662.4	4.60441	0.217183
Brapa_ESTC021050	AT5G59960	Symbols: | similar to Os01g0151600 [Oryza sativa (japonica cultivar-group)] (GB:NP_001042041.1); similar to similar to Dictyostelium discoideum (Slime mold). MkpA protein (GB:AAL92603.1) | chr5:24159578-24162366 REVERSE	1529.79	7022.4	4.59043	0.217844
Brapa_ESTC011036	AT2G17730	Symbols: | zinc finger (C3HC4-type RING finger) family protein | chr2:7711224-7712394 FORWARD	463.808	2128.88	4.59	0.217865
Brapa_ESTC027103	AT1G32060	Symbols: PRK | PRK (PHOSPHORIBULOKINASE); ATP binding / phosphoribulokinase/ protein binding | chr1:11532648-11534386 FORWARD	2810.57	12896	4.58839	0.217941
Brapa_ESTC009691	AT5G65000	Symbols: | nucleotide-sugar transporter family protein | chr5:25982349-25984533 REVERSE	1126.55	5165.31	4.58507	0.218099
Brapa_ESTC037807	AT3G29280	Symbols: | similar to Os03g0257000 [Oryza sativa (japonica cultivar-group)] (GB:NP_001049601.1); similar to expressed protein [Oryza sativa (japonica cultivar-group)] (GB:ABF95053.1) | chr3:11237942-11239184 REVERSE	1595.36	7313.23	4.58406	0.218147
Brapa_ESTC010227	AT5G46030	Symbols: | Identical to Transcription elongation factor 1 homolog [Arabidopsis Thaliana] (GB:Q8LEF3;GB:Q9FNL9); similar to hypothetical protein [Oryza sativa (japonica cultivar-group)] (GB:BAD69422.1); similar to Os07g0631100 [Oryza sativa (japonica cultivar-group)] (GB:NP_001060360.1); similar to Os02g0134300 [Oryza sativa (japonica cultivar-group)] (GB:NP_001045811.1); contains InterPro domain …	587.361	2691.4	4.58219	0.218236
Brapa_ESTC012370	AT5G52960	Symbols: | similar to hypothetical protein asr2994 [Nostoc sp. PCC 7120] (GB:NP_487034.1); similar to Os05g0569200 [Oryza sativa (japonica cultivar-group)] (GB:NP_001056361.1) | chr5:21494476-21495495 FORWARD	223.699	1024.66	4.58053	0.218315
Brapa_ESTC018498	AT2G18390	Symbols: ATARLC1, HAL, ARL2, TTN5 | TTN5 (TITAN 5); GTP binding | chr2:7995417-7996456 FORWARD	1615.67	7397.21	4.57842	0.218416
Brapa_ESTC011845	AT4G35110	Symbols: | similar to unknown protein [Arabidopsis thaliana] (TAIR:AT2G16900.1); similar to pEARLI 4 gene product (GB:AAC37472.1); contains InterPro domain Arabidopsis phospholipase-like; (InterPro:IPR007942) | chr4:16712665-16714230 REVERSE	1073.09	4912.8	4.57818	0.218427
Brapa_ESTC009891	AT5G38290	Symbols: | peptidyl-tRNA hydrolase family protein | chr5:15320721-15322611 FORWARD	948.37	4334.61	4.57059	0.21879
Brapa_ESTC019472	AT5G02160	Symbols: | similar to hypothetical protein [Solanum lycopersicum] (GB:BAD95796.1) | chr5:426389-426895 FORWARD	4845.68	22138	4.56861	0.218885
Brapa_ESTC020981	AT2G41760	Symbols: | similar to PREDICTED: similar to CG8253-PA [Tribolium castaneum] (GB:XP_974547.1); similar to Os05g0387900 [Oryza sativa (japonica cultivar-group)] (GB:NP_001055427.1); contains domain UNKNOWN (PTHR13035); contains domain gb def: Expressed protein (At2g41760/T11A7.14) (PTHR13035:SF2) | chr2:17429942-17431333 FORWARD	573.962	2621.09	4.56666	0.218978
Brapa_ESTC045090	no_hits_f	---------	3633	16566.2	4.55992	0.219302
Brapa_ESTC029307	no_hits_f	---------	836.92	3815.44	4.55891	0.219351
Brapa_ESTC006160	AT4G00970	Symbols: | protein kinase family protein | chr4:418437-421694 FORWARD	272.637	1242.6	4.55771	0.219408
Brapa_ESTC027109	AT1G66910	Symbols: | protein kinase, putative | chr1:24965297-24967604 REVERSE	648.597	2952.75	4.55252	0.219659
Brapa_ESTC013196	AT2G24270	Symbols: ALDH11A3 | ALDH11A3 (Aldehyde dehydrogenase 11A3); 3-chloroallyl aldehyde dehydrogenase/ glyceraldehyde-3-phosphate dehydrogenase (NADP+) | chr2:10334405-10336681 REVERSE	2241.62	10204	4.55207	0.219681
Brapa_ESTC028129	no_hits_f	---------	236.848	1077.06	4.54747	0.219902
Brapa_ESTC005576	AT5G03940	Symbols: 54CP, CPSRP54, SRP54CP, FFC | FFC (FIFTY-FOUR CHLOROPLAST HOMOLOGUE); 7S RNA binding / GTP binding / mRNA binding | chr5:1060264-1063256 REVERSE	569.183	2586.74	4.54465	0.220039
Brapa_ESTC041450	AT2G32295	Symbols: | EXS family protein / ERD1/XPR1/SYG1 family protein | chr2:13726625-13729036 FORWARD	684.907	3110.43	4.54139	0.220197
Brapa_ESTC045481	AT5G10480	Symbols: PEP, PAS2 | PAS2 (PASTICCINO 2) | chr5:3298048-3300049 REVERSE	239.952	1089.52	4.54057	0.220236
Brapa_ESTC008312	AT2G19940	Symbols: | semialdehyde dehydrogenase family protein | chr2:8620505-8622730 FORWARD	292.033	1325.8	4.5399	0.220269
Brapa_ESTC000971	AT3G48610	Symbols: | phosphoesterase family protein | chr3:18022638-18024944 REVERSE	420.816	1908.23	4.53459	0.220527
Brapa_ESTC034676	AT5G57830	Symbols: | similar to unknown protein [Arabidopsis thaliana] (TAIR:AT4G30830.1); similar to Protein of unknown function DUF593 [Medicago truncatula] (GB:ABE79503.1); contains InterPro domain Protein of unknown function DUF593; (InterPro:IPR007656) | chr5:23446632-23448086 REVERSE	262.503	1190.34	4.53458	0.220528
Brapa_ESTC005664	AT1G29910	Symbols: CAB3, AB180, LHCB1.2 | CAB3 (CHLOROPHYLL A/B BINDING PROTEIN 3); chlorophyll binding | chr1:10472427-10473230 REVERSE	3706.75	16803.3	4.53316	0.220597
Brapa_ESTC003254	AT3G13235	Symbols: | ubiquitin family protein | chr3:4271499-4274355 REVERSE	332.704	1507.66	4.53154	0.220676
Brapa_ESTC047235	AT2G04400	Symbols: | indole-3-glycerol phosphate synthase (IGPS) | chr2:1531205-1533575 FORWARD	593.964	2690.16	4.52916	0.220791
Brapa_ESTC009131	AT5G47190	Symbols: | ribosomal protein L19 family protein | chr5:19181659-19183291 REVERSE	5036.15	22804.6	4.52818	0.220839
Brapa_ESTC042738	AT3G08740	Symbols: | elongation factor P (EF-P) family protein | chr3:2654794-2656160 REVERSE	2613.05	11825.7	4.52563	0.220964
Brapa_ESTC029058	AT3G28760	| Symbols: | similar to 3-dehydroquinate synthase	304.715	1376.76	4.51819	0.221328
Brapa_ESTC038098	no_hits_f	---------	836.35	3776.4	4.51533	0.221468
Brapa_ESTC008931	AT3G55330	Symbols: | photosystem II reaction center PsbP family protein | chr3:20525008-20526252 REVERSE	2019.98	9120.38	4.51508	0.22148
Brapa_ESTC013183	AT4G30820	Symbols: | cyclin-dependent kinase-activating kinase assembly factor-related / CDK-activating kinase assembly factor-related | chr4:15007150-15008384 FORWARD	766.985	3461.73	4.51343	0.221561
Brapa_ESTC022750	AT2G24762	Symbols: | similar to GDU1 (GLUTAMINE DUMPER 1) [Arabidopsis thaliana] (TAIR:AT4G31730.1); similar to At5g57685 [Medicago truncatula] (GB:ABE81292.1) | chr2:10566558-10567028 FORWARD	1314.72	5931.61	4.51169	0.221646
Brapa_ESTC008457	AT5G20500	| Symbols: | glutaredoxin, putative | chr5:6938654-6939667 FORWARD	3077.73	13864.2	4.50468	0.221991
Brapa_ESTC020149	AT1G15820	Symbols: CP24, LHCB6 | LHCB6 (LIGHT HARVESTING COMPLEX PSII); chlorophyll binding | chr1:5446680-5447671 REVERSE	3023	13616.5	4.5043	0.22201
Brapa_ESTC021118	AT4G18975	Symbols: | pentatricopeptide (PPR) repeat-containing protein | chr4:10392181-10393676 REVERSE	3590.91	16166.2	4.50198	0.222125
Brapa_ESTC042076	no_hits_f	---------	2254.55	10147.6	4.50094	0.222176
Brapa_ESTC017644	AT5G26780	Symbols: SHM2 | SHM2 (SERINE HYDROXYMETHYLTRANSFERASE 2); glycine hydroxymethyltransferase | chr5:9418302-9421728 FORWARD	1339.8	6026.82	4.4983	0.222306
Brapa_ESTC050505	AT3G47470	Symbols: CAB4, LHCA4 | LHCA4 (Photosystem I light harvesting complex gene 4); chlorophyll binding | chr3:17504607-17505758 REVERSE	495.954	2227.21	4.49076	0.222679
Brapa_ESTC012909	AT5G37360	Symbols: | similar to Os02g0815400 [Oryza sativa (japonica cultivar-group)] (GB:NP_001048502.1) | chr5:14822667-14825343 REVERSE	284.916	1279.29	4.49006	0.222714
Brapa_ESTC009733	AT1G12220	Symbols: RPS5 | RPS5 (RESISTANT TO P. SYRINGAE 5) | chr1:4145009-4147678 FORWARD	326.71	1466.11	4.4875	0.222841
Brapa_ESTC031644	AT1G68590	Symbols: | plastid-specific 30S ribosomal protein 3, putative / PSRP-3, putative | chr1:25761256-25761832 REVERSE	3034.76	13614.2	4.48609	0.222911
Brapa_ESTC033464	AT1G71720	Symbols: | S1 RNA-binding domain-containing protein | chr1:26987406-26989555 FORWARD	872.88	3914.72	4.48483	0.222974
Brapa_ESTC020120	AT5G09660	Symbols: PMDH2 | PMDH2 (PEROXISOMAL NAD-MALATE DEHYDROGENASE 2); malate dehydrogenase | chr5:2993646-2995552 REVERSE	3048.42	13664.5	4.48249	0.22309
Brapa_ESTC015054	AT5G15230	Symbols: GASA4 | GASA4 (GAST1 PROTEIN HOMOLOG 4) | chr5:4945289-4946028 FORWARD	6712.63	30049	4.47649	0.223389
Brapa_ESTC051803	AT5G16180	Symbols: CRS1, ATCRS1 | ATCRS1/CRS1 (ARABIDOPSIS ORTHOLOG OF MAIZE CHLOROPLAST SPLICING FACTOR CRS1) | chr5:5279887-5282901 FORWARD	467.775	2092.35	4.47298	0.223564
Brapa_ESTC043942	AT3G60580	Symbols: | zinc finger (C2H2 type) family protein | chr3:22404982-22405848 FORWARD	313.823	1402.11	4.46784	0.223822
Brapa_ESTC000368	AT4G30580	Symbols: EMB1995, ATS2 | ATS2 (EMBRYO DEFECTIVE 1995); 1-acylglycerol-3-phosphate O-acyltransferase/ acyltransferase | chr4:14932521-14934495 REVERSE	1225.28	5474.15	4.46767	0.22383
Brapa_ESTC029117	AT4G37800	Symbols: | xyloglucan:xyloglucosyl transferase, putative / xyloglucan endotransglycosylase, putative / endo-xyloglucan transferase, putative | chr4:17775697-17777366 REVERSE	2337.2	10436.8	4.46551	0.223938
Brapa_ESTC002551	AT5G46800	Symbols: BOU | BOU (A BOUT DE SOUFFLE); binding | chr5:19006006-19007037 REVERSE	1351.6	6033.55	4.46401	0.224014
Brapa_ESTC040055	AT1G26680	Symbols: | transcriptional factor B3 family protein | chr1:9219539-9223180 FORWARD	977.62	4359.42	4.45922	0.224255
Brapa_ESTC001342	AT1G44575	Symbols: PSBS, NPQ4 | NPQ4 (NONPHOTOCHEMICAL QUENCHING) | chr1:16874208-16875634 FORWARD	5081.84	22660.1	4.45903	0.224264
Brapa_ESTC017452	AT1G32060	Symbols: PRK | PRK (PHOSPHORIBULOKINASE); ATP binding / phosphoribulokinase/ protein binding | chr1:11532648-11534386 FORWARD	3917.53	17449.4	4.45418	0.224508
Brapa_ESTC025795	no_hits_f	---------	439.488	1957.43	4.45389	0.224523
Brapa_ESTC012923	AT5G57040	Symbols: | lactoylglutathione lyase family protein / glyoxalase I family protein | chr5:23101261-23102342 REVERSE	5137.55	22872.7	4.45206	0.224615
Brapa_ESTC011143	no_hits_f	---------	561.924	2500.8	4.45042	0.224698
Brapa_ESTC048882	AT5G58220	| Symbols: | steroid binding | chr5:23571772-23573087 REVERSE	463.762	2063.31	4.44907	0.224766
Brapa_ESTC022308	AT3G11230	| Symbols: | yippee family protein | chr3:3516689-3518199 FORWARD	1691.48	7522.86	4.4475	0.224845
Brapa_ESTC028011	AT5G58710	Symbols: ROC7 | ROC7 (rotamase CyP 7); peptidyl-prolyl cis-trans isomerase | chr5:23735066-23736721 FORWARD	2311.62	10270	4.44277	0.225085
Brapa_ESTC006602	AT4G37930	Symbols: STM, SHMT1, SHM1 | SHM1 (SERINE HYDROXYMETHYLTRANSFERASE 1); glycine hydroxymethyltransferase | chr4:17831885-17834736 REVERSE	6433.59	28570.6	4.44085	0.225182
Brapa_ESTC019558	AT2G39855	Symbols: | similar to unknown protein [Arabidopsis thaliana] (TAIR:AT3G55646.1) | chr2:16644923-16645930 FORWARD	592.731	2628.9	4.43523	0.225467
Brapa_ESTC008786	AT1G08980	Symbols: AMI1, ATAMI1 | ATAMI1 (AMIDASE-LIKE PROTEIN 1); amidase | chr1:2884458-2886433 FORWARD	2314.24	10253.3	4.43053	0.225707
Brapa_ESTC039805	AT1G20610	Symbols: CYCB2;3 | CYCB2;3 (CYCLIN B2;3); cyclin-dependent protein kinase regulator | chr1:7135063-7137263 REVERSE	817.565	3620.05	4.42784	0.225844
Brapa_ESTC033816	AT4G24660	Symbols: ATHB22, MEE68 | ATHB22/MEE68 (ARABIDOPSIS THALIANA HOMEOBOX PROTEIN 22, maternal effect embryo arrest 68); DNA binding / transcription factor | chr4:12724861-12725523 REVERSE	2580.12	11424.3	4.42782	0.225845
Brapa_ESTC050885	no_hits_f	---------	737.641	3263.26	4.42391	0.226044
Brapa_ESTC014493	AT3G59400	Symbols: GUN4 | GUN4 (Genomes uncoupled 4) | chr3:21959858-21960655 REVERSE	3966.62	17530	4.41938	0.226276
Brapa_ESTC045037	no_hits_f	---------	976.004	4310.19	4.41616	0.226441
Brapa_ESTC029420	no_hits_f	---------	1191.02	5259.27	4.41577	0.226461
Brapa_ESTC044198	no_hits_f	---------	464.806	2051.3	4.41324	0.226591
Brapa_ESTC049790	no_hits_f	---------	252.299	1111.35	4.40489	0.22702
Brapa_ESTC009063	AT4G11410	Symbols: | short-chain dehydrogenase/reductase (SDR) family protein | chr4:6945122-6947181 REVERSE	427.25	1879.58	4.39925	0.227311
Brapa_ESTC049599	no_hits_f	---------	1035.82	4554.31	4.39682	0.227437
Brapa_ESTC011788	AT1G09250	| Symbols: | transcription factor | chr1:2989511-2990134 FORWARD	1532.85	6736.02	4.39444	0.22756
Brapa_ESTC001515	AT5G11280	Symbols: | similar to unknown protein [Arabidopsis thaliana] (TAIR:AT1G80200.1); similar to Ankyrin [Medicago truncatula] (GB:ABE78998.1) | chr5:3597322-3598348 FORWARD	4238.6	18588.3	4.38548	0.228025
Brapa_ESTC048983	no_hits_f	---------	346.78	1515.71	4.37081	0.22879
Brapa_ESTC001366	AT5G04140	Symbols: GLS1, GLUS, GLU1 | GLU1 (FERREDOXIN-DEPENDENT GLUTAMATE SYNTHASE 1) | chr5:1130032-1138187 FORWARD	428.326	1871.52	4.36938	0.228865
Brapa_ESTC046070	AT5G45670	Symbols: | GDSL-motif lipase/hydrolase family protein | chr5:18545827-18547391 FORWARD	341.08	1489.79	4.36786	0.228945
Brapa_ESTC002349	AT5G36700	Symbols: | phosphoglycolate phosphatase, putative | chr5:14439159-14441660 REVERSE	3418.59	14926.7	4.36633	0.229025
Brapa_ESTC001068	AT1G68585	| Symbols: | metal ion binding | chr1:25760574-25761089 FORWARD	1886.04	8234.13	4.36583	0.229052
Brapa_ESTC007955	AT2G31980	Symbols: | cysteine proteinase inhibitor-related | chr2:13616323-13616847 REVERSE	229.825	1003.21	4.3651	0.22909
Brapa_ESTC046417	AT5G58240	Symbols: | bis(5'-adenosyl)-triphosphatase, putative | chr5:23575575-23576539 REVERSE	618.268	2696.9	4.36202	0.229251
Brapa_ESTC007406	AT1G48460	Symbols: | similar to unknown protein [Arabidopsis thaliana] (TAIR:AT5G63040.2); similar to Os01g0704200 [Oryza sativa (japonica cultivar-group)] (GB:NP_001044004.1); similar to hypothetical protein MtrDRAFT_AC124952g33v1 [Medicago truncatula] (GB:ABE93586.1); contains domain Multidrug resistance ABC transporter MsbA, N-terminal domain (SSF90123) | chr1:17915137-17916817 FORWARD	5182.26	22604.5	4.3619	0.229258
Brapa_ESTC050460	AT1G16880	Symbols: | uridylyltransferase-related | chr1:5773789-5776118 FORWARD	3732.32	16262.5	4.35721	0.229505
Brapa_ESTC041620	AT2G33480	Symbols: ANAC041 | ANAC041 (Arabidopsis NAC domain containing protein 41); transcription factor | chr2:14188351-14189323 FORWARD	504.167	2194.53	4.35278	0.229738
Brapa_ESTC002621	AT5G16290	Symbols: | acetolactate synthase small subunit, putative | chr5:5333877-5337390 FORWARD	1806.1	7860.93	4.35243	0.229757
Brapa_ESTC026163	AT1G79260	Symbols: | Identical to Uncharacterized protein At1g79260 [Arabidopsis Thaliana] (GB:O64527); similar to hypothetical protein MBP_91N22.4 [Musa balbisiana] (GB:ABF70108.1); contains domain FAMILY NOT NAMED (PTHR15854); contains domain gb def: YUP8H12R.14 protein (At1g79260/YUP8H12R_40) (PTHR15854:SF5) | chr1:29818175-29818959 FORWARD	1635.59	7110.51	4.34737	0.230024
Brapa_ESTC017738	AT5G04380	Symbols: | S-adenosyl-L-methionine:carboxyl methyltransferase family protein | chr5:1234884-1236318 FORWARD	310.31	1348.89	4.34691	0.230048
Brapa_ESTC019626	AT1G10640	Symbols: | polygalacturonase, putative / pectinase, putative | chr1:3515479-3516932 REVERSE	1687.31	7332	4.34538	0.23013
Brapa_ESTC016828	AT5G15900	Symbols: | similar to unknown protein [Arabidopsis thaliana] (TAIR:AT5G15890.1); similar to hypothetical protein [Cleome spinosa] (GB:ABD96865.1); contains InterPro domain Protein of unknown function DUF231, plant; (InterPro:IPR004253) | chr5:5189527-5192073 REVERSE	1299.28	5640.95	4.3416	0.23033
Brapa_ESTC004315	AT5G17780	Symbols: | hydrolase, alpha/beta fold family protein | chr5:5867431-5868978 REVERSE	541.414	2350.03	4.34054	0.230386
Brapa_ESTC026991	AT4G04330	Symbols: | similar to unnamed protein product [Ostreococcus tauri] (GB:CAL56420.1); similar to Os08g0425200 [Oryza sativa (japonica cultivar-group)] (GB:NP_001061837.1) | chr4:2116698-2118561 REVERSE	2047.16	8884.74	4.34003	0.230413
Brapa_ESTC035904	AT2G45510	Symbols: CYP704A2 | CYP704A2 (cytochrome P450, family 704, subfamily A, polypeptide 2); oxygen binding | chr2:18760159-18762018 FORWARD	770.33	3341.69	4.338	0.230521
Brapa_ESTC045685	AT5G16030	Symbols: | similar to unknown protein [Arabidopsis thaliana] (TAIR:AT3G02500.1); similar to hypothetical protein [Cleome spinosa] (GB:ABD96956.1) | chr5:5238245-5240581 FORWARD	2261.51	9809.28	4.33749	0.230548
Brapa_ESTC043624	AT3G53170	Symbols: | pentatricopeptide (PPR) repeat-containing protein | chr3:19715707-19717136 REVERSE	2697.8	11694.2	4.33472	0.230696
Brapa_ESTC050957	no_hits_f	---------	457.017	1979.67	4.33172	0.230855
Brapa_ESTC031912	no_hits_f	---------	1767.48	7655.24	4.33116	0.230885
Brapa_ESTC014626	AT5G43740	Symbols: | disease resistance protein (CC-NBS-LRR class), putative | chr5:17583237-17585825 FORWARD	3777.55	16352.5	4.32886	0.231007
Brapa_ESTC037911	AT2G43190	Symbols: | ribonuclease P family protein | chr2:17963297-17964910 FORWARD	360.705	1560.21	4.32545	0.23119
Brapa_ESTC035063	AT3G04300	Symbols: | similar to unknown protein [Arabidopsis thaliana] (TAIR:AT4G10300.1); similar to Cupin, RmlC-type [Medicago truncatula] (GB:ABE82642.1); contains InterPro domain Protein of unknown function DUF861, cupin_3; (InterPro:IPR008579); contains InterPro domain Cupin, RmlC-type; (InterPro:IPR011051) | chr3:1140325-1140730 FORWARD	834.374	3608.66	4.32499	0.231214
Brapa_ESTC007041	AT2G31110	Symbols: | similar to unknown protein [Arabidopsis thaliana] (TAIR:AT2G42570.1); similar to unknown [Pisum sativum] (GB:ABA29158.1); contains InterPro domain Protein of unknown function DUF231, plant; (InterPro:IPR004253) | chr2:13265599-13269148 REVERSE	1460.58	6316.88	4.32491	0.231219
Brapa_ESTC011586	AT5G35630	Symbols: GLN2, ATGSL1, GS2 | GS2 (GLUTAMINE SYNTHETASE 2) | chr5:13848450-13850469 FORWARD	2345.35	10138.8	4.32294	0.231324
Brapa_ESTC048211	AT2G24270	Symbols: ALDH11A3 | ALDH11A3 (Aldehyde dehydrogenase 11A3); 3-chloroallyl aldehyde dehydrogenase/ glyceraldehyde-3-phosphate dehydrogenase (NADP+) | chr2:10334405-10336681 REVERSE	383.514	1657.03	4.32065	0.231447
Brapa_ESTC006521	AT1G13080	Symbols: CYP71B2 | CYP71B2 (CYTOCHROME P450 71B2); oxygen binding | chr1:4459210-4460805 FORWARD	1726.45	7458.17	4.31995	0.231484
Brapa_ESTC000774	AT5G48580	Symbols: FKBP15-2 | FKBP15-2 (FK506-binding protein 15 kD-2); FK506 binding / peptidyl-prolyl cis-trans isomerase | chr5:19713382-19714530 REVERSE	1264.9	5456.67	4.31391	0.231808
Brapa_ESTC019820	AT2G38025	Symbols: | similar to OTU-like cysteine protease family protein [Arabidopsis thaliana] (TAIR:AT3G57810.3); similar to Os03g0266000 [Oryza sativa (japonica cultivar-group)] (GB:NP_001049654.1); similar to OTU-like cysteine protease family protein, expressed [Oryza sativa (japonica cultivar-group)] (GB:ABF95145.1); contains InterPro domain Ovarian tumour, otubain; (InterPro:IPR003323) | chr2:159223…	7157.03	30868.4	4.31302	0.231856
Brapa_ESTC006379	AT5G16030	Symbols: | similar to unknown protein [Arabidopsis thaliana] (TAIR:AT3G02500.1); similar to hypothetical protein [Cleome spinosa] (GB:ABD96956.1) | chr5:5238245-5240581 FORWARD	596.693	2572.72	4.31163	0.231931
Brapa_ESTC018500	AT2G24270	Symbols: ALDH11A3 | ALDH11A3 (Aldehyde dehydrogenase 11A3); 3-chloroallyl aldehyde dehydrogenase/ glyceraldehyde-3-phosphate dehydrogenase (NADP+) | chr2:10334405-10336681 REVERSE	2764.86	11916.9	4.31013	0.232012
Brapa_ESTC041927	AT2G41940	Symbols: ZFP8 | ZFP8 (ZINC FINGER PROTEIN 8); nucleic acid binding / transcription factor/ zinc ion binding | chr2:17514634-17515407 FORWARD	1549.78	6679.08	4.3097	0.232035
Brapa_ESTC002307	AT1G54780	Symbols: | thylakoid lumen 18.3 kDa protein | chr1:20443200-20444620 FORWARD	3501.64	15090	4.30941	0.23205
Brapa_ESTC021051	AT5G09660	Symbols: PMDH2 | PMDH2 (PEROXISOMAL NAD-MALATE DEHYDROGENASE 2); malate dehydrogenase | chr5:2993646-2995552 REVERSE	10599.4	45667.7	4.30852	0.232098
Brapa_ESTC041447	AT2G32280	Symbols: | similar to unknown protein [Arabidopsis thaliana] (TAIR:AT4G21310.1); similar to Os07g0545100 [Oryza sativa (japonica cultivar-group)] (GB:NP_001059913.1); similar to Os05g0435100 [Oryza sativa (japonica cultivar-group)] (GB:NP_001055641.1); similar to hypothetical protein [Oryza sativa (japonica cultivar-group)] (GB:AAT47054.1); contains InterPro domain Protein of unknown function DUF…	3674.32	15820.9	4.3058	0.232245
Brapa_ESTC012762	AT1G80080	Symbols: TMM | TMM (TOO MANY MOUTHS); protein binding | chr1:30132966-30134456 REVERSE	1281.87	5515.92	4.30303	0.232395
Brapa_ESTC038724	AT1G10120	Symbols: | DNA binding / transcription factor | chr1:3304230-3305986 REVERSE	1563.35	6716.21	4.29604	0.232773
Brapa_ESTC002477	AT1G50900	Symbols: | similar to unnamed protein product [Ostreococcus tauri] (GB:CAL57548.1); similar to Os07g0520800 [Oryza sativa (japonica cultivar-group)] (GB:NP_001059804.1); contains InterPro domain Ankyrin; (InterPro:IPR002110) | chr1:18869940-18870682 FORWARD	4986.12	21413.8	4.29468	0.232846
Brapa_ESTC028933	AT5G09230	| Symbols: SRT2 | SRT2 | chr5:2871560-2873614 FORWARD	377.28	1620	4.29389	0.232889
Brapa_ESTC000353	AT1G08380	Symbols: PSAO | PSAO (photosystem I subunit O) | chr1:2641001-2641736 REVERSE	5085.51	21807.2	4.2881	0.233203
Brapa_ESTC000099	AT2G42570	Symbols: | similar to unknown protein [Arabidopsis thaliana] (TAIR:AT2G31110.2); similar to unknown [Pisum sativum] (GB:ABA29158.1); contains InterPro domain Protein of unknown function DUF231, plant; (InterPro:IPR004253) | chr2:17724576-17726999 REVERSE	473.324	2028.51	4.28567	0.233336
Brapa_ESTC020139	AT3G25030	Symbols: | calmodulin binding / protein binding / zinc ion binding | chr3:9122657-9123409 FORWARD	2478.35	10618.9	4.28467	0.23339
Brapa_ESTC005439	AT4G29410	Symbols: | 60S ribosomal protein L28 (RPL28C) | chr4:14468445-14469970 REVERSE	268.398	1149.83	4.28405	0.233424
Brapa_ESTC028631	no_hits_f	---------	249.806	1069.82	4.2826	0.233503
Brapa_ESTC002736	AT4G28750	Symbols: PSAE-1 | PSAE-1 (PSA E1 KNOCKOUT) | chr4:14202957-14203894 REVERSE	811.298	3474.39	4.28251	0.233508
Brapa_ESTC013646	AT1G19990	Symbols: | similar to unknown protein [Arabidopsis thaliana] (TAIR:AT5G11600.1); similar to conserved hypothetical protein [Medicago truncatula] (GB:ABE81379.1) | chr1:6935318-6936656 FORWARD	638.38	2733.65	4.28217	0.233527
Brapa_ESTC027717	AT3G25810	Symbols: | myrcene/ocimene synthase, putative | chr3:9432042-9435081 FORWARD	1590.7	6811.33	4.28197	0.233537
Brapa_ESTC051399	AT3G52490	Symbols: | heat shock protein-related | chr3:19466828-19469699 REVERSE	811.081	3467.36	4.27499	0.233919
Brapa_ESTC002911	AT2G44180	Symbols: MAP2A | MAP2A (METHIONINE AMINOPEPTIDASE 2A); methionyl aminopeptidase | chr2:18276518-18278861 REVERSE	329.749	1409.34	4.27398	0.233974
Brapa_ESTC043114	AT3G17710	| Symbols: | F-box family protein | chr3:6055603-6056709 FORWARD	1188.52	5078.97	4.27336	0.234008
Brapa_ESTC004613	AT2G32280	Symbols: | similar to unknown protein [Arabidopsis thaliana] (TAIR:AT4G21310.1); similar to Os07g0545100 [Oryza sativa (japonica cultivar-group)] (GB:NP_001059913.1); similar to Os05g0435100 [Oryza sativa (japonica cultivar-group)] (GB:NP_001055641.1); similar to hypothetical protein [Oryza sativa (japonica cultivar-group)] (GB:AAT47054.1); contains InterPro domain Protein of unknown function DUF…	2264.45	9638.69	4.25653	0.234933
Brapa_ESTC012941	AT3G47590	Symbols: | esterase/lipase/thioesterase family protein | chr3:17547118-17548500 REVERSE	1637.57	6969.49	4.256	0.234963
Brapa_ESTC000140	AT5G57345	Symbols: | similar to unknown protein [Arabidopsis thaliana] (TAIR:AT1G54520.1); similar to conserved hypothetical protein [Medicago truncatula] (GB:ABE83998.1); contains domain N-terminal nucleophile aminohydrolases (Ntn hydrolases) (SSF56235) | chr5:23246788-23247813 REVERSE	2265.47	9640.45	4.25539	0.234996
Brapa_ESTC014386	no_hits_f	---------	1326.62	5642.97	4.25364	0.235093
Brapa_ESTC025545	AT2G35370	Symbols: GDCH | GDCH (Glycine decarboxylase complex H) | chr2:14898318-14899129 FORWARD	999.395	4240.03	4.2426	0.235705
Brapa_ESTC006035	AT1G80940	Symbols: | similar to predicted protein [Populus alba x Populus tremula] (GB:AAR14272.1); contains domain MAPKK-RELATED SERINE/THREONINE PROTEIN KINASES (PTHR22986); contains domain SERINE/THREONINE PROTEIN KINASE (PTHR22986:SF13) | chr1:30415851-30416835 FORWARD	529.193	2243.12	4.23876	0.235918
Brapa_ESTC012490	AT5G16710	Symbols: DHAR3 | DHAR3 (DEHYDROASCORBATE REDUCTASE 1); glutathione dehydrogenase (ascorbate) | chr5:5483315-5484929 FORWARD	2390.13	10115.4	4.23215	0.236286
Brapa_ESTC001497	AT3G09500	Symbols: | 60S ribosomal protein L35 (RPL35A) | chr3:2917053-2917901 FORWARD	946.394	4005.16	4.23202	0.236294
Brapa_ESTC008609	AT5G15350	Symbols: | plastocyanin-like domain-containing protein | chr5:4985187-4986157 REVERSE	562.333	2376.27	4.22573	0.236645
Brapa_ESTC042638	AT3G07080	| Symbols: | membrane protein | chr3:2241366-2242940 FORWARD	395.91	1672.14	4.22354	0.236768
Brapa_ESTC006874	AT3G05520	Symbols: | F-actin capping protein alpha subunit family protein | chr3:1598617-1601140 FORWARD	2208.19	9320.39	4.22083	0.23692
Brapa_ESTC006729	AT3G07990	Symbols: SCPL27 | SCPL27 (serine carboxypeptidase-like 27); serine carboxypeptidase | chr3:2552550-2554650 FORWARD	433.339	1828.28	4.21905	0.23702
Brapa_ESTC001214	AT2G17695	Symbols: | similar to expressed protein [Oryza sativa (japonica cultivar-group)] (GB:ABF93547.1); similar to Unknown protein [Oryza sativa (japonica cultivar-group)] (GB:AAN62778.1); similar to expressed protein [Oryza sativa (japonica cultivar-group)] (GB:ABF93551.1) | chr2:7691296-7692091 REVERSE	2813.27	11868	4.21858	0.237047
Brapa_ESTC011916	AT5G59610	Symbols: | DNAJ heat shock N-terminal domain-containing protein | chr5:24030391-24032180 FORWARD	783.915	3303.43	4.21402	0.237303
Brapa_ESTC020905	AT5G52900	Symbols: | similar to hypothetical protein MtrDRAFT_AC150980g17v1 [Medicago truncatula] (GB:ABE87114.1) | chr5:21470119-21470918 REVERSE	382.373	1611.14	4.21353	0.237331
Brapa_ESTC011267	AT5G39830	Symbols: DEGP8 | DEGP8 (DEGP PROTEASE 8); serine-type peptidase/ trypsin | chr5:15960111-15962904 FORWARD	791.43	3333.61	4.21213	0.237409
Brapa_ESTC004338	AT5G55380	Symbols: | membrane bound O-acyl transferase (MBOAT) family protein / wax synthase-related | chr5:22464072-22465097 REVERSE	1557.12	6556.15	4.21043	0.237505
Brapa_ESTC014517	AT5G24530	Symbols: | oxidoreductase, 2OG-Fe(II) oxygenase family protein | chr5:8378967-8383157 FORWARD	708.028	2980.49	4.20957	0.237554
Brapa_ESTC011989	AT4G08770	| Symbols: | peroxidase, putative | chr4:5598256-5600259 REVERSE	7467.27	31433.6	4.20952	0.237557
Brapa_ESTC035298	AT1G32080	Symbols: | membrane protein, putative | chr1:11537552-11539736 REVERSE	802.162	3370.66	4.20197	0.237984
Brapa_ESTC008524	AT3G04020	Symbols: | similar to conserved hypothetical protein [Medicago truncatula] (GB:ABE78669.1) | chr3:1041078-1042384 FORWARD	1034.21	4344.58	4.20087	0.238046
Brapa_ESTC049955	no_hits_f	---------	494.34	2074.22	4.19594	0.238326
Brapa_ESTC019425	AT2G32650	Symbols: | similar to PTAC18 (PLASTID TRANSCRIPTIONALLY ACTIVE18) [Arabidopsis thaliana] (TAIR:AT2G32180.1); similar to Os02g0784900 [Oryza sativa (japonica cultivar-group)] (GB:NP_001048328.1); similar to hypothetical protein MCA0659 [Methylococcus capsulatus str. Bath] (GB:YP_113172.1); similar to OSIGBa0140O07.4 [Oryza sativa (indica cultivar-group)] (GB:CAH67236.1); contains InterPro domain P…	2536.54	10641.4	4.19524	0.238365
Brapa_ESTC037095	AT5G66190	Symbols: ATLFNR1 | ATLFNR1 (LEAF FNR 1) | chr5:26468429-26469842 REVERSE	3658.08	15341.7	4.19392	0.23844
Brapa_ESTC008162	AT4G28660	Symbols: PSB28 | photosystem II reaction centre W (PsbW) family protein | chr4:14150014-14150939 FORWARD	1659.34	6957.54	4.19296	0.238495
Brapa_ESTC011985	AT1G03630	Symbols: PORC, POR C | POR C (PROTOCHLOROPHYLLIDE OXIDOREDUCTASE); NADPH dehydrogenase/ oxidoreductase/ protochlorophyllide reductase | chr1:907698-909244 FORWARD	454.396	1904.9	4.19216	0.238541
Brapa_ESTC011891	AT2G29150	Symbols: | tropinone reductase, putative / tropine dehydrogenase, putative | chr2:12542792-12544041 REVERSE	862.046	3611.62	4.18959	0.238687
Brapa_ESTC006664	AT5G13110	Symbols: G6PD2 | G6PD2 (GLUCOSE-6-PHOSPHATE DEHYDROGENASE 2); glucose-6-phosphate 1-dehydrogenase | chr5:4158955-4161643 FORWARD	1184.99	4962.06	4.18743	0.23881
Brapa_ESTC001047	AT5G48440	| Symbols: | oxidoreductase | chr5:19647158-19649814 REVERSE	667.31	2792.96	4.1854	0.238926
Brapa_ESTC049053	AT1G80850	Symbols: | methyladenine glycosylase family protein | chr1:30390499-30392164 REVERSE	393.999	1648.95	4.18516	0.238939
Brapa_ESTC010173	AT4G11175	Symbols: | translation initiation factor IF-1, chloroplast, putative | chr4:6818158-6818802 FORWARD	2278.34	9528.24	4.1821	0.239114
Brapa_ESTC030201	AT4G28750	Symbols: PSAE-1 | PSAE-1 (PSA E1 KNOCKOUT) | chr4:14202957-14203894 REVERSE	2509.18	10480.2	4.17674	0.239421
Brapa_ESTC019973	AT1G80940	Symbols: | similar to predicted protein [Populus alba x Populus tremula] (GB:AAR14272.1); contains domain MAPKK-RELATED SERINE/THREONINE PROTEIN KINASES (PTHR22986); contains domain SERINE/THREONINE PROTEIN KINASE (PTHR22986:SF13) | chr1:30415851-30416835 FORWARD	1360.08	5678.05	4.17479	0.239533
Brapa_ESTC017823	AT1G61520	Symbols: LHCA3 | LHCA3 (Photosystem I light harvesting complex gene 3); chlorophyll binding | chr1:22703817-22704814 FORWARD	6636.51	27703.6	4.17442	0.239554
Brapa_ESTC016789	AT4G34060	Symbols: DML3 | DML3 (DEMETER-LIKE PROTEIN 3) | chr4:16314009-16319259 FORWARD	326.425	1358.81	4.1627	0.240229
Brapa_ESTC027038	AT5G58920	Symbols: | similar to Os01g0362000 [Oryza sativa (japonica cultivar-group)] (GB:NP_001043026.1) | chr5:23810465-23811240 FORWARD	458.686	1908.96	4.1618	0.240281
Brapa_ESTC037970	AT2G37240	Symbols: | Identical to UPF0308 protein At2g37240, chloroplast precursor [Arabidopsis Thaliana] (GB:Q9ZUU2;GB:Q94A62); similar to unknown protein [Arabidopsis thaliana] (TAIR:AT5G65840.1); similar to Os03g0284600 [Oryza sativa (japonica cultivar-group)] (GB:NP_001049763.1); similar to PREDICTED: similar to TPA_exp: C9ORF21 isoform 2 [Pan troglodytes] (GB:XP_520707.2); similar to Os03g0729200 [Ory…	3142.17	13071.7	4.16009	0.24038
Brapa_ESTC037113	AT3G28455	Symbols: CLE25 | CLE25 (CLAVATA3/ESR-RELATED 25); receptor binding | chr3:10671457-10672168 REVERSE	541.603	2252.73	4.15938	0.240421
Brapa_ESTC014453	AT4G21380	Symbols: ARK3 | ARK3 (Arabidopsis Receptor Kinase 3); kinase | chr4:11389230-11393101 REVERSE	257.083	1068.84	4.15757	0.240525
Brapa_ESTC001396	AT3G21055	Symbols: PSBTN | PSBTN (photosystem II subunit T) | chr3:7376767-7377078 REVERSE	6316.32	26251.7	4.15617	0.240606
Brapa_ESTC041383	AT2G31380	Symbols: STH | STH (salt tolerance homologue); transcription factor/ zinc ion binding | chr2:13389227-13390379 FORWARD	3548.87	14725.2	4.14926	0.241007
Brapa_ESTC008570	AT1G70100	Symbols: | similar to unknown protein [Arabidopsis thaliana] (TAIR:AT1G24160.1); similar to Targeting for Xklp2 [Medicago truncatula] (GB:ABE84619.1) | chr1:26407399-26409495 FORWARD	461.915	1916.25	4.14849	0.241052
Brapa_ESTC011477	AT5G16450	Symbols: | dimethylmenaquinone methyltransferase family protein | chr5:5374360-5375345 FORWARD	3976.02	16485.7	4.14628	0.24118
Brapa_ESTC011281	AT1G26100	Symbols: | cytochrome B561 family protein | chr1:9022703-9024068 REVERSE	1309.07	5427.31	4.14593	0.241201
Brapa_ESTC038417	AT3G11945	| Symbols: | prenyltransferase | chr3:3780047-3782886 REVERSE	2027.97	8407.18	4.14561	0.241219
Brapa_ESTC026713	AT2G38760	Symbols: ANNAT3 | ANNAT3 (ANNEXIN 3, ANNEXIN ARABIDOPSIS 3); calcium ion binding / calcium-dependent phospholipid binding | chr2:16208164-16209568 FORWARD	996.865	4131.52	4.14451	0.241283
Brapa_ESTC000947	AT1G53170	Symbols: ATERF-8, ATERF8 | ATERF-8/ATERF8 (ETHYLENE RESPONSE ELEMENT BINDING FACTOR 4); DNA binding / transcription factor/ transcriptional repressor | chr1:19825207-19825764 REVERSE	1073.8	4450.03	4.14419	0.241302
Brapa_ESTC042624	AT3G06880	Symbols: | transducin family protein / WD-40 repeat family protein | chr3:2169862-2175692 REVERSE	337.154	1396.93	4.1433	0.241354
Brapa_ESTC004688	AT3G05300	Symbols: | cytidine/deoxycytidylate deaminase family protein | chr3:1508030-1508493 REVERSE	241.568	1000.69	4.14248	0.241401
Brapa_ESTC019437	AT5G52900	Symbols: | similar to hypothetical protein MtrDRAFT_AC150980g17v1 [Medicago truncatula] (GB:ABE87114.1) | chr5:21470119-21470918 REVERSE	847.879	3512.02	4.14212	0.241422
Brapa_ESTC032962	AT4G31060	Symbols: | AP2 domain-containing transcription factor, putative | chr4:15116902-15117465 FORWARD	381.956	1581.61	4.14082	0.241498
Brapa_ESTC005330	AT3G25805	Symbols: | similar to Os04g0462300 [Oryza sativa (japonica cultivar-group)] (GB:NP_001053001.1); similar to B1358B12.10 [Oryza sativa (japonica cultivar-group)] (GB:CAE76001.1) | chr3:9427591-9429406 REVERSE	2170.18	8982.33	4.13898	0.241605
Brapa_ESTC023074	AT4G34250	Symbols: | fatty acid elongase, putative | chr4:16394753-16396234 FORWARD	386.508	1598.72	4.13632	0.241761
Brapa_ESTC026267	AT4G02440	Symbols: EID1 | EID1 (EMPFINDLICHER IM DUNKELROTEN LICHT 1) | chr4:1072555-1073565 FORWARD	2298.82	9499.76	4.13245	0.241987
Brapa_ESTC016968	AT1G56130	Symbols: | leucine-rich repeat family protein / protein kinase family protein | chr1:20998596-21004552 REVERSE	568.868	2349.12	4.12946	0.242162
Brapa_ESTC041555	AT2G30500	Symbols: | kinase interacting family protein | chr2:13005406-13007149 REVERSE	892.922	3686.7	4.1288	0.242201
Brapa_ESTC026290	AT5G49760	Symbols: | leucine-rich repeat family protein / protein kinase family protein | chr5:20233905-20238278 FORWARD	370.898	1531.24	4.12847	0.242221
Brapa_ESTC051861	AT4G28750	Symbols: PSAE-1 | PSAE-1 (PSA E1 KNOCKOUT) | chr4:14202957-14203894 REVERSE	661.546	2730.82	4.12794	0.242252
Brapa_ESTC020125	AT3G47470	Symbols: CAB4, LHCA4 | LHCA4 (Photosystem I light harvesting complex gene 4); chlorophyll binding | chr3:17504607-17505758 REVERSE	9516.23	39165.3	4.11563	0.242976
Brapa_ESTC013739	AT5G10100	Symbols: | trehalose-6-phosphate phosphatase, putative | chr5:3157981-3160276 FORWARD	649.547	2672.93	4.11507	0.243009
Brapa_ESTC034537	AT5G21950	Symbols: | hydrolase, alpha/beta fold family protein | chr5:7254070-7255869 REVERSE	442.673	1820.78	4.11315	0.243123
Brapa_ESTC003898	no_hits_f	---------	2414.29	9921.17	4.10935	0.243347
Brapa_ESTC009792	AT4G14965	Symbols: ATMAPR4 | ATMAPR4 (ARABIDOPSIS THALIANA MEMBRANE-ASSOCIATED PROGESTERONE BINDING PROTEIN 4); heme binding / transition metal ion binding | chr4:8551353-8553365 FORWARD	2489.84	10230.5	4.1089	0.243374
Brapa_ESTC051862	AT4G28750	Symbols: PSAE-1 | PSAE-1 (PSA E1 KNOCKOUT) | chr4:14202957-14203894 REVERSE	811.85	3334.72	4.10756	0.243454
Brapa_ESTC031653	AT1G68660	Symbols: | similar to Os08g0432500 [Oryza sativa (japonica cultivar-group)] (GB:NP_001061868.1); similar to ATP-dependent Clp protease adaptor protein ClpS [Trichodesmium erythraeum IMS101] (GB:YP_720956.1); contains InterPro domain ATP-dependent Clp protease adaptor protein ClpS; (InterPro:IPR003769) | chr1:25781721-25782746 REVERSE	641.526	2635.03	4.10744	0.243461
Brapa_ESTC000495	AT5G16710	Symbols: DHAR3 | DHAR3 (DEHYDROASCORBATE REDUCTASE 1); glutathione dehydrogenase (ascorbate) | chr5:5483315-5484929 FORWARD	2158.41	8862.53	4.10605	0.243543
Brapa_ESTC014729	AT1G27020	Symbols: | similar to unknown protein [Arabidopsis thaliana] (TAIR:AT1G27030.1); similar to unknown protein [Oryza sativa (japonica cultivar-group)] (GB:AAN05517.1); similar to Os10g0463800 [Oryza sativa (japonica cultivar-group)] (GB:NP_001064789.1) | chr1:9378622-9380406 FORWARD	1235.19	5070.62	4.10513	0.243597
Brapa_ESTC013792	AT5G03940	Symbols: 54CP, CPSRP54, SRP54CP, FFC | FFC (FIFTY-FOUR CHLOROPLAST HOMOLOGUE); 7S RNA binding / GTP binding / mRNA binding | chr5:1060264-1063256 REVERSE	1899.1	7796.02	4.10511	0.243599
Brapa_ESTC000160	AT1G74210	Symbols: | glycerophosphoryl diester phosphodiesterase family protein | chr1:27914057-27916446 FORWARD	713.008	2925.91	4.10361	0.243688
Brapa_ESTC029254	AT1G34065	Symbols: SAMC2 | SAMC2 (S-adenosylmethionine carrier 2); binding | chr1:12398696-12400861 REVERSE	697.38	2861.11	4.10266	0.243745
Brapa_ESTC043844	no_hits_f	---------	2777.89	11390.5	4.10041	0.243878
Brapa_ESTC031501	AT5G48880	Symbols: PKT1, KAT5, PKT2 | KAT5/PKT1/PKT2 (PEROXISOMAL 3-KETO-ACYL-COA THIOLASE 1, PEROXISOMAL 3-KETO-ACYL-COA THIOLASE 2); acetyl-CoA C-acyltransferase | chr5:19831802-19834247 REVERSE	1967.84	8065.5	4.09866	0.243982
Brapa_ESTC025936	AT4G00370	Symbols: ANTR2 | ANTR2 (anion transporter 2); organic anion transporter | chr4:163153-166111 REVERSE	458.505	1877.86	4.09562	0.244164
Brapa_ESTC009002	AT2G46970	Symbols: PIL1 | PIL1 (PHYTOCHROME INTERACTING FACTOR 3-LIKE 1); transcription factor | chr2:19302686-19304747 REVERSE	2066.69	8456.59	4.09185	0.244388
Brapa_ESTC019862	AT1G70850	Symbols: MLP34 | MLP34 (MLP-LIKE PROTEIN 34) | chr1:26719091-26720406 REVERSE	263.328	1076.81	4.08923	0.244545
Brapa_ESTC049600	no_hits_f	---------	1041.01	4252.9	4.08536	0.244777
Brapa_ESTC025282	AT1G19360	Symbols: | similar to RRA2 (REDUCED RESIDUAL ARABINOSE 2) [Arabidopsis thaliana] (TAIR:AT1G75110.1); similar to hypothetical protein [Oryza sativa (japonica cultivar-group)] (GB:BAC83249.1); contains InterPro domain Reticulon; (InterPro:IPR003388) | chr1:6690663-6692202 REVERSE	844.76	3450.39	4.08446	0.24483
Brapa_ESTC041596	AT2G31150	Symbols: | ATP binding / ATPase, coupled to transmembrane movement of ions, phosphorylative mechanism | chr2:13280398-13281482 FORWARD	1219.86	4982.13	4.08418	0.244847
Brapa_ESTC036514	AT3G15115	Symbols: | similar to unknown protein [Arabidopsis thaliana] (TAIR:AT1G53180.1) | chr3:5086226-5087359 REVERSE	606.229	2474.85	4.08237	0.244956
Brapa_ESTC004008	no_hits_f	---------	793.174	3236.61	4.08058	0.245063
Brapa_ESTC031965	AT2G39890	Symbols: ATPROT1, ProT1 | ProT1 (PROLINE TRANSPORTER 1) | chr2:16663100-16665280 FORWARD	368.379	1503.16	4.08047	0.24507
Brapa_ESTC050066	no_hits_f	---------	1535.35	6261.89	4.07848	0.24519
Brapa_ESTC047506	AT3G47470	Symbols: CAB4, LHCA4 | LHCA4 (Photosystem I light harvesting complex gene 4); chlorophyll binding | chr3:17504607-17505758 REVERSE	3220.56	13134.2	4.07823	0.245204
Brapa_ESTC006969	AT4G20130	Symbols: PTAC14 | PTAC14 (PLASTID TRANSCRIPTIONALLY ACTIVE14) | chr4:10878924-10881707 FORWARD	1834.25	7475.88	4.07571	0.245356
Brapa_ESTC011463	AT5G16030	Symbols: | similar to unknown protein [Arabidopsis thaliana] (TAIR:AT3G02500.1); similar to hypothetical protein [Cleome spinosa] (GB:ABD96956.1) | chr5:5238245-5240581 FORWARD	304.098	1237.91	4.07076	0.245654
Brapa_ESTC023610	AT2G46910	Symbols: | plastid-lipid associated protein PAP / fibrillin family protein | chr2:19279496-19280925 FORWARD	4070.51	16557.2	4.0676	0.245845
Brapa_ESTC018888	AT3G29320	Symbols: | glucan phosphorylase, putative | chr3:11254108-11258824 FORWARD	507.299	2062.79	4.06622	0.245929
Brapa_ESTC018358	AT3G02450	Symbols: | cell division protein ftsH, putative | chr3:502883-505037 REVERSE	3836.62	15594.4	4.06462	0.246025
Brapa_ESTC027974	AT4G29020	| Symbols: | glycine-rich protein | chr4:14305038-14305514 FORWARD	11486	46676.7	4.06379	0.246076
Brapa_ESTC001501	AT3G02730	Symbols: TRXF1, ATF1 | ATF1/TRXF1 (THIOREDOXIN F-TYPE 1); thiol-disulfide exchange intermediate | chr3:588577-589598 REVERSE	7389.67	30025.3	4.06314	0.246115
Brapa_ESTC030959	AT1G61450	Symbols: | similar to Os05g0275600 [Oryza sativa (japonica cultivar-group)] (GB:NP_001055074.1) | chr1:22676987-22677500 FORWARD	2551.59	10363.8	4.0617	0.246202
Brapa_ESTC048762	AT3G56910	Symbols: PSRP5 | PSRP5 (PLASTID-SPECIFIC 50S RIBOSOMAL PROTEIN 5) | chr3:21080537-21081236 REVERSE	495.912	2013.94	4.06108	0.24624
Brapa_ESTC048457	AT3G48570	Symbols: | protein transport protein SEC61 gamma subunit, putative | chr3:18015589-18015897 REVERSE	1019.1	4135.03	4.05753	0.246455
Brapa_ESTC022567	AT4G35000	Symbols: APX3 | APX3 (ASCORBATE PEROXIDASE 3); L-ascorbate peroxidase | chr4:16665012-16667546 REVERSE	1922.31	7798.09	4.05662	0.24651
Brapa_ESTC003511	AT4G25640	Symbols: | MATE efflux family protein | chr4:13076962-13078974 REVERSE	1109.14	4498.83	4.05614	0.24654
Brapa_ESTC044852	AT4G32120	Symbols: | galactosyltransferase family protein | chr4:15517236-15519693 REVERSE	2170.9	8799.19	4.05325	0.246716
Brapa_ESTC010479	AT2G33735	Symbols: | DNAJ heat shock N-terminal domain-containing protein | chr2:14275608-14276470 REVERSE	703.506	2850.52	4.05188	0.246799
Brapa_ESTC045829	AT5G20670	Symbols: | similar to unknown protein [Arabidopsis thaliana] (TAIR:AT1G72510.2); similar to 4Fe-4S ferredoxin, iron-sulfur binding [Medicago truncatula] (GB:ABE81755.1); contains InterPro domain Protein of unknown function DUF1677, plant; (InterPro:IPR012876) | chr5:6993334-6993795 REVERSE	957.337	3876.6	4.04936	0.246953
Brapa_ESTC028058	AT1G66330	Symbols: | senescence-associated family protein | chr1:24733543-24735807 REVERSE	523.577	2119.86	4.0488	0.246987
Brapa_ESTC001219	AT1G51400	Symbols: | photosystem II 5 kD protein | chr1:19055840-19056160 REVERSE	1462.72	5917.64	4.04564	0.24718
Brapa_ESTC023450	AT1G32060	Symbols: PRK | PRK (PHOSPHORIBULOKINASE); ATP binding / phosphoribulokinase/ protein binding | chr1:11532648-11534386 FORWARD	2482.55	10042.9	4.0454	0.247195
Brapa_ESTC008042	AT4G14210	Symbols: PDS, PDE226, PDS3 | PDS3 (PHYTOENE DESATURASE) | chr4:8190421-8194764 REVERSE	1505.57	6089.45	4.04461	0.247242
Brapa_ESTC047123	no_hits_f	---------	380.028	1534.37	4.03752	0.247677
Brapa_ESTC003335	AT2G32720	Symbols: B5 #4 | B5 #4 (cytochrome b5 family protein #4); heme binding / transition metal ion binding | chr2:13884090-13885524 REVERSE	247.87	1000.53	4.03651	0.247739
Brapa_ESTC015787	AT1G30825	Symbols: ARPC2A, DIS2 | DIS2 (DISTORTED TRICHOMES 2); structural molecule | chr1:10961087-10962980 FORWARD	1404	5661.76	4.03259	0.247979
Brapa_ESTC020537	AT4G11640	Symbols: ATSR | ATSR (ARABIDOPSIS THALIANA SIGNAL-RESPONSIVE); serine racemase | chr4:7021764-7023246 FORWARD	330.989	1332.97	4.02723	0.248309
Brapa_ESTC047573	AT3G47070	Symbols: | similar to thylakoid soluble phosphoprotein [Spinacia oleracea] (GB:CAD45559.1) | chr3:17348190-17348492 REVERSE	1703.86	6858.3	4.02515	0.248438
Brapa_ESTC009492	AT1G33811	Symbols: | GDSL-motif lipase/hydrolase family protein | chr1:12267898-12269670 FORWARD	919.649	3698.24	4.02136	0.248672
Brapa_ESTC028465	no_hits_f	---------	544.573	2189.51	4.0206	0.248719
Brapa_ESTC000417	AT2G44670	Symbols: | senescence-associated protein-related | chr2:18432354-18432748 FORWARD	812.406	3262.41	4.01574	0.24902
Brapa_ESTC047748	AT2G22970	| Symbols: SCPL11 | SCPL11 | chr2:9781955-9785335 FORWARD	266.269	1069.18	4.01541	0.24904
Brapa_ESTC015366	AT4G25260	Symbols: | invertase/pectin methylesterase inhibitor family protein | chr4:12936015-12936620 REVERSE	3283.73	13185	4.01525	0.24905
Brapa_ESTC002178	AT2G45790	Symbols: ATPMM | eukaryotic phosphomannomutase family protein | chr2:18862950-18864827 FORWARD	1464.56	5879.4	4.01445	0.2491
Brapa_ESTC004473	AT4G21510	| Symbols: | F-box family protein | chr4:11446205-11447037 REVERSE	272.453	1092.84	4.01111	0.249307
Brapa_ESTC004207	AT1G73270	Symbols: SCPL6 | SCPL6 (serine carboxypeptidase-like 6); serine carboxypeptidase | chr1:27553067-27556178 REVERSE	530.339	2124.82	4.00653	0.249592
Brapa_ESTC046226	no_hits_f	---------	776.473	3110.75	4.00626	0.24961
Brapa_ESTC001300	AT3G28940	Symbols: | avirulence-responsive protein, putative / avirulence induced gene (AIG) protein, putative | chr3:10969561-10970548 REVERSE	6918.72	27699.4	4.00354	0.249779
Brapa_ESTC000149	AT3G20230	Symbols: | 50S ribosomal protein L18 family | chr3:7055645-7056685 REVERSE	532.762	2132.3	4.00235	0.249853
Brapa_ESTC013990	AT1G74440	Symbols: | similar to unknown protein [Arabidopsis thaliana] (TAIR:AT1G18720.1); similar to YGL010w-like protein [Picea mariana] (GB:AAC32136.1); contains InterPro domain Protein of unknown function DUF962; (InterPro:IPR009305) | chr1:27982869-27984032 REVERSE	306.146	1224.96	4.00123	0.249923
Brapa_ESTC022871	AT3G63170	Symbols: | similar to unknown protein [Arabidopsis thaliana] (TAIR:AT2G26310.1); similar to putative chalcone isomerase [Lycopersicon esculentum] (GB:AAQ55182.1); similar to Os07g0571600 [Oryza sativa (japonica cultivar-group)] (GB:NP_001060052.1) | chr3:23345650-23346968 FORWARD	2229.33	8911.55	3.99741	0.250162
Brapa_ESTC000688	AT1G73325	Symbols: | trypsin and protease inhibitor family protein / Kunitz family protein | chr1:27571179-27571847 REVERSE	404.685	1615.48	3.99194	0.250504
Brapa_ESTC005308	AT3G30841	Symbols: | 2,3-biphosphoglycerate-independent phosphoglycerate mutase-related / phosphoglyceromutase-related | chr3:12594074-12595880 FORWARD	253.951	1013.67	3.9916	0.250526
Brapa_ESTC013404	AT5G59610	Symbols: | DNAJ heat shock N-terminal domain-containing protein | chr5:24030391-24032180 FORWARD	310.841	1240.69	3.9914	0.250539
Brapa_ESTC013377	AT2G02410	Symbols: | similar to expressed protein (with alternative splicing) [Oryza sativa (japonica cultivar-group)] (GB:AAS07352.1); contains InterPro domain Protein of unknown function DUF901; (InterPro:IPR010298) | chr2:632712-634612 FORWARD	753.029	3004.99	3.99054	0.250593
Brapa_ESTC007534	AT5G50180	Symbols: | protein kinase, putative | chr5:20448342-20450109 FORWARD	1700.5	6784.46	3.98969	0.250646
Brapa_ESTC022542	AT1G32550	Symbols: | ferredoxin family protein | chr1:11771949-11774097 REVERSE	1874.64	7479.1	3.98962	0.25065
Brapa_ESTC049503	no_hits_f	---------	503.486	2008.2	3.98859	0.250715
Brapa_ESTC021372	AT1G52500	Symbols: FPG-2, ATFPG-2, ATMMH-2, FPG-1, ATFPG-1, ATMMH-1 | ATFPG-1/ATFPG-2/ATMMH-1/ATMMH-2/FPG-1/FPG-2 (FORMAMIDOPYRIMIDINE-DNA GLYCOSYLASE 1, FORMAMIDOPYRIMIDINE-DNA GLYCOSYLASE 2); DNA N-glycosylase | chr1:19563712-19565724 FORWARD	533.06	2125.6	3.98754	0.250781
Brapa_ESTC029895	AT5G19050	Symbols: | similar to unnamed protein product [Kluyveromyces lactis] (GB:XP_455602.1); similar to Os07g0211800 [Oryza sativa (japonica cultivar-group)] (GB:NP_001059175.1); contains InterPro domain Esterase/lipase/thioesterase; (InterPro:IPR000379); contains InterPro domain Protein of unknown function DUF1749; (InterPro:IPR013744) | chr5:6369309-6371728 FORWARD	3055.76	12174.6	3.98415	0.250995
Brapa_ESTC002460	AT1G11750	Symbols: NCLPP1, NCLPP6, CLPP6 | CLPP6 (Clp protease proteolytic subunit 6); endopeptidase Clp | chr1:3967609-3969535 FORWARD	876.854	3493.08	3.98365	0.251026
Brapa_ESTC035865	AT1G48660	Symbols: | auxin-responsive GH3 family protein | chr1:17999616-18001640 REVERSE	312.057	1242.53	3.98174	0.251146
Brapa_ESTC005608	AT1G25580	Symbols: ANAC008 | ANAC008 (Arabidopsis NAC domain containing protein 8); transcription factor | chr1:8997051-8999587 REVERSE	1738.64	6920.96	3.98067	0.251214
Brapa_ESTC010978	AT5G47190	Symbols: | ribosomal protein L19 family protein | chr5:19181659-19183291 REVERSE	8511.4	33867.4	3.97906	0.251315
Brapa_ESTC020356	AT3G54890	Symbols: LHCA1 | LHCA1; chlorophyll binding | chr3:20350684-20351900 REVERSE	3723.46	14806.9	3.97665	0.251468
Brapa_ESTC031135	AT3G15570	Symbols: | phototropic-responsive NPH3 family protein | chr3:5270274-5271707 REVERSE	418.488	1663.56	3.97517	0.251562
Brapa_ESTC001162	AT2G23390	Symbols: | similar to Os04g0442200 [Oryza sativa (japonica cultivar-group)] (GB:NP_001052881.1); similar to P0076O17.10 [Oryza sativa (japonica cultivar-group)] (GB:CAE02512.1); contains InterPro domain Protein of unknown function DUF482; (InterPro:IPR007434) | chr2:9967648-9970556 REVERSE	526.363	2087.57	3.96603	0.252141
Brapa_ESTC020549	AT2G26900	Symbols: | bile acid:sodium symporter family protein | chr2:11482234-11484948 REVERSE	5748.08	22777.5	3.96263	0.252358
Brapa_ESTC049649	AT5G47060	Symbols: | senescence-associated protein-related | chr5:19134070-19134866 FORWARD	372.982	1476.91	3.95974	0.252542
Brapa_ESTC008469	AT3G04260	Symbols: PTAC3 | PTAC3 (PLASTID TRANSCRIPTIONALLY ACTIVE3); DNA binding | chr3:1123238-1127522 REVERSE	2119.52	8392.38	3.95957	0.252553
Brapa_ESTC001782	AT2G42220	Symbols: | rhodanese-like domain-containing protein | chr2:17599183-17600383 FORWARD	1946.01	7693.82	3.95364	0.252932
Brapa_ESTC011235	AT1G48350	Symbols: | ribosomal protein L18 family protein | chr1:17870937-17871883 FORWARD	5525.45	21825.8	3.95005	0.253161
Brapa_ESTC025825	AT5G57030	Symbols: LUT2 | LUT2 (LUTEIN DEFICIENT 2); lycopene epsilon cyclase | chr5:23094624-23097044 FORWARD	2764.44	10906.6	3.94532	0.253465
Brapa_ESTC049809	no_hits_f	---------	632.078	2492.29	3.94301	0.253613
Brapa_ESTC027691	AT1G11440	Symbols: | similar to glycine-rich protein [Arabidopsis thaliana] (TAIR:AT3G29075.1); similar to Os06g0232000 [Oryza sativa (japonica cultivar-group)] (GB:NP_001057224.1); similar to Stress protein DDR48 , related [Medicago truncatula] (GB:ABE86766.1) | chr1:3849418-3850509 FORWARD	1483.88	5846.53	3.94003	0.253805
Brapa_ESTC047754	AT1G29530	Symbols: | similar to unknown protein [Arabidopsis thaliana] (TAIR:AT2G34310.3); similar to expressed protein, putative [Medicago truncatula] (GB:ABE81136.1) | chr1:10325539-10326637 REVERSE	832.071	3278.13	3.93972	0.253825
Brapa_ESTC046823	no_hits_f	---------	467.799	1842.86	3.93943	0.253844
Brapa_ESTC026447	AT5G67580	Symbols: TRB2, ATTRB2 | ATTRB2/TRB2 (TELOMERE REPEAT BINDING FACTOR 2); DNA binding / transcription factor | chr5:26973069-26974299 REVERSE	871.072	3430.63	3.9384	0.25391
Brapa_ESTC000617	AT3G14415	Symbols: | (S)-2-hydroxy-acid oxidase, peroxisomal, putative / glycolate oxidase, putative / short chain alpha-hydroxy acid oxidase, putative | chr3:4818674-4820755 FORWARD	4512.65	17762	3.93605	0.254062
Brapa_ESTC002710	AT3G48740	Symbols: | nodulin MtN3 family protein | chr3:18063799-18065648 REVERSE	2190.05	8618.16	3.93514	0.25412
Brapa_ESTC008911	AT1G70410	Symbols: | carbonic anhydrase, putative / carbonate dehydratase, putative | chr1:26537830-26541120 REVERSE	1302.97	5126.56	3.93452	0.254161
Brapa_ESTC046607	AT5G62430	Symbols: CDF1 | CDF1 (CYCLING DOF FACTOR 1); DNA binding / protein binding / transcription factor | chr5:25086524-25088013 REVERSE	819.382	3216.15	3.92509	0.254771
Brapa_ESTC040444	AT1G69523	Symbols: | UbiE/COQ5 methyltransferase family protein | chr1:26133490-26134820 FORWARD	829.809	3254.25	3.92169	0.254992
Brapa_ESTC018565	AT5G28750	Symbols: | thylakoid assembly protein, putative | chr5:10784146-10785681 REVERSE	3855.23	15109.2	3.91914	0.255158
Brapa_ESTC014700	AT2G30570	Symbols: PSBW | photosystem II reaction center W (PsbW) protein-related | chr2:13026403-13027130 REVERSE	7727.85	30284.2	3.91884	0.255178
Brapa_ESTC006328	AT5G66190	Symbols: ATLFNR1 | ATLFNR1 (LEAF FNR 1) | chr5:26468429-26469842 REVERSE	2908.87	11398.5	3.91853	0.255198
Brapa_ESTC015161	AT3G04120	Symbols: GAPC-1, GAPC | GAPC (GLYCERALDEHYDE-3-PHOSPHATE DEHYDROGENASE C SUBUNIT); glyceraldehyde-3-phosphate dehydrogenase | chr3:1081084-1083138 FORWARD	355.924	1394.69	3.91851	0.255199
Brapa_ESTC002909	AT5G17230	Symbols: PSY | PSY (PHYTOENE SYNTHASE) | chr5:5659841-5662089 REVERSE	1735.24	6798.62	3.91797	0.255234
Brapa_ESTC004982	AT5G65010	Symbols: ASN2 | ASN2 (ASPARAGINE SYNTHETASE 2); asparagine synthase (glutamine-hydrolyzing) | chr5:25986450-25989504 FORWARD	519.286	2034.17	3.91724	0.255282
Brapa_ESTC012744	AT1G16020	Symbols: | similar to unknown protein [Arabidopsis thaliana] (TAIR:AT1G80910.1); similar to Os08g0427300 [Oryza sativa (japonica cultivar-group)] (GB:NP_001061842.1); similar to myrosinase precursor [Brassica oleracea] (GB:AAL67437.1); contains domain FAMILY NOT NAMED (PTHR13056); contains domain SUBFAMILY NOT NAMED (PTHR13056:SF2) | chr1:5498627-5501012 FORWARD	556.375	2178.73	3.91594	0.255367
Brapa_ESTC045016	AT4G34250	Symbols: | fatty acid elongase, putative | chr4:16394753-16396234 FORWARD	1200.49	4699.34	3.91452	0.255459
Brapa_ESTC047434	AT2G32140	| Symbols: | transmembrane receptor | chr2:13662791-13664110 REVERSE	6242.55	24431.3	3.91367	0.255514
Brapa_ESTC003880	no_hits_f	---------	383.77	1501.58	3.91271	0.255577
Brapa_ESTC005577	AT4G22890	Symbols: | similar to unknown protein [Arabidopsis thaliana] (TAIR:AT4G11960.1); similar to Os03g0857400 [Oryza sativa (japonica cultivar-group)] (GB:NP_001051955.1); similar to Os08g0526300 [Oryza sativa (japonica cultivar-group)] (GB:NP_001062297.1); similar to hypothetical protein OSJNBa0003M24.13 [Oryza sativa (japonica cultivar-group)] (GB:AAQ56398.1); contains domain no description (G3D.2.2…	4920.02	19240	3.91055	0.255718
Brapa_ESTC015501	AT3G52180	Symbols: ATPTPKIS1, DSP4, SEX4 | SEX4 (STARCH-EXCESS 4); oxidoreductase/ polysaccharide binding / protein tyrosine/serine/threonine phosphatase | chr3:19360862-19364437 REVERSE	1300.85	5084.53	3.90862	0.255845
Brapa_ESTC016750	AT5G53170	Symbols: FTSH11 | FTSH11 (FtsH protease 11); ATP-dependent peptidase/ ATPase/ metallopeptidase | chr5:21580249-21585148 REVERSE	1471.42	5751.08	3.90852	0.255851
Brapa_ESTC012038	AT4G25150	Symbols: | acid phosphatase, putative | chr4:12901746-12902892 REVERSE	1760.47	6879.1	3.90754	0.255916
Brapa_ESTC051027	no_hits_f	---------	519.329	2029.25	3.90745	0.255922
Brapa_ESTC009543	AT5G15310	Symbols: AtMYB16, AtMIXTA | AtMIXTA/AtMYB16 (myb domain protein 16) | chr5:4974897-4976109 FORWARD	1175.91	4592.34	3.90535	0.256059
Brapa_ESTC022029	AT1G09440	Symbols: | protein kinase family protein | chr1:3045515-3047395 REVERSE	3263.02	12741.9	3.90494	0.256086
Brapa_ESTC020636	AT5G37360	Symbols: | similar to Os02g0815400 [Oryza sativa (japonica cultivar-group)] (GB:NP_001048502.1) | chr5:14822667-14825343 REVERSE	988.685	3860.73	3.90491	0.256088
Brapa_ESTC048437	no_hits_f	---------	362.859	1416.03	3.90242	0.256251
Brapa_ESTC000278	AT5G26280	Symbols: | meprin and TRAF homology domain-containing protein / MATH domain-containing protein | chr5:9208727-9210406 FORWARD	5227.01	20390.9	3.90106	0.25634
Brapa_ESTC027749	AT5G09660	Symbols: PMDH2 | PMDH2 (PEROXISOMAL NAD-MALATE DEHYDROGENASE 2) | chr5:2993646-2995170 REVERSE	8321.15	32458.9	3.90077	0.25636
Brapa_ESTC018018	AT5G38360	| Symbols: | catalytic | chr5:15349519-15350786 REVERSE	972.731	3794.03	3.90039	0.256385
Brapa_ESTC050340	no_hits_f	---------	1239.49	4834.42	3.90033	0.256389
Brapa_ESTC041982	AT2G40435	Symbols: | similar to unknown protein [Arabidopsis thaliana] (TAIR:AT3G56220.1); similar to Os03g0338400 [Oryza sativa (japonica cultivar-group)] (GB:NP_001050055.1); similar to hypothetical protein [Oryza sativa (japonica cultivar-group)] (GB:BAC10078.1); similar to Os05g0337200 [Oryza sativa (japonica cultivar-group)] (GB:NP_001055237.1); contains domain Regulatory domain in the aminoacid metab…	327.996	1279.11	3.89977	0.256425
Brapa_ESTC027646	AT4G00752	Symbols: | UBX domain-containing protein | chr4:317771-320793 REVERSE	727.112	2835.45	3.89961	0.256436
Brapa_ESTC006652	AT2G46640	| Symbols: | unknown protein | chr2:19155862-19157821 FORWARD	902.941	3520.99	3.89947	0.256445
Brapa_ESTC001807	AT5G18100	Symbols: CSD3 | CSD3 (COPPER/ZINC SUPEROXIDE DISMUTASE 3); copper, zinc superoxide dismutase | chr5:5987223-5988708 FORWARD	1569.83	6117.11	3.89667	0.256629
Brapa_ESTC013014	AT3G62910	Symbols: APG3 | APG3 (ALBINO AND PALE GREEN); translation release factor | chr3:23268636-23271361 REVERSE	979.413	3812.76	3.8929	0.256878
Brapa_ESTC032218	AT5G22920	Symbols: | zinc finger (C3HC4-type RING finger) family protein | chr5:7665146-7667034 FORWARD	1225.27	4768.89	3.89211	0.25693
Brapa_ESTC012447	AT4G24660	Symbols: ATHB22, MEE68 | ATHB22/MEE68 (ARABIDOPSIS THALIANA HOMEOBOX PROTEIN 22, maternal effect embryo arrest 68); DNA binding / transcription factor | chr4:12724861-12725523 REVERSE	1130.97	4400.22	3.89066	0.257026
Brapa_ESTC006152	AT1G13080	Symbols: CYP71B2 | CYP71B2 (CYTOCHROME P450 71B2); oxygen binding | chr1:4459491-4460805 FORWARD	3217.88	12517.3	3.88992	0.257075
Brapa_ESTC009204	AT3G56400	Symbols: ATWRKY70, WRKY70 | WRKY70 (WRKY DNA-binding protein 70); transcription factor | chr3:20920061-20921388 REVERSE	1702.14	6614.2	3.88581	0.257346
Brapa_ESTC029240	no_hits_f	---------	592.229	2300.19	3.88395	0.25747
Brapa_ESTC018174	AT4G21210	Symbols: | phosphoprotein phosphatase/ protein kinase | chr4:11307012-11308597 FORWARD	1425.39	5530.53	3.88001	0.257731
Brapa_ESTC034430	AT3G14090	Symbols: ATEXO70D3 | ATEXO70D3 (exocyst subunit EXO70 family protein D3); protein binding | chr3:4669515-4671386 REVERSE	2198.01	8522.59	3.87741	0.257904
Brapa_ESTC009671	AT4G14620	Symbols: | similar to unknown protein [Arabidopsis thaliana] (TAIR:AT3G22970.1); similar to unknown protein [Oryza sativa (japonica cultivar-group)] (GB:AAP44687.1); similar to expressed protein [Oryza sativa (japonica cultivar-group)] (GB:AAT76408.1); similar to Os03g0796600 [Oryza sativa (japonica cultivar-group)] (GB:NP_001051556.1); contains InterPro domain Protein of unknown function DUF506,…	918.418	3557.55	3.87356	0.25816
Brapa_ESTC005321	AT1G01010	Symbols: ANAC001 | ANAC001 (Arabidopsis NAC domain containing protein 1); transcription factor | chr1:3760-5630 FORWARD	1447.02	5603.9	3.87272	0.258217
Brapa_ESTC028445	AT5G04860	Symbols: | similar to unknown protein [Arabidopsis thaliana] (TAIR:AT3G11760.1); similar to conserved hypothetical protein [Medicago truncatula] (GB:ABE84189.1) | chr5:1411761-1414460 REVERSE	2042.16	7899.9	3.8684	0.258505
Brapa_ESTC011709	AT4G05010	| Symbols: | F-box family protein | chr4:2567472-2568160 FORWARD	3406.91	13178.2	3.86808	0.258526
Brapa_ESTC010304	AT4G22920	Symbols: | Similar to the tomato senescence-inducible chloroplast stay-green protein 1. It is upregulated during maximal senescence in the Arabidopsis life cycle, especially in senescent leaves. | chr4:12016787-12017980 REVERSE	616.582	2384.26	3.8669	0.258605
Brapa_ESTC020525	AT4G30820	Symbols: | cyclin-dependent kinase-activating kinase assembly factor-related / CDK-activating kinase assembly factor-related | chr4:15007150-15008384 FORWARD	480.101	1856.47	3.86683	0.25861
Brapa_ESTC002179	AT5G46860	Symbols: ATVAM3, SYP22, ATSYP22, SGR3, VAM3 | VAM3 (syntaxin 22); t-SNARE | chr5:19029569-19031022 REVERSE	295.33	1141.47	3.86507	0.258728
Brapa_ESTC001053	AT4G09650	Symbols: | ATP synthase delta chain, chloroplast, putative / H(+)-transporting two-sector ATPase, delta (OSCP) subunit, putative | chr4:6100796-6101500 FORWARD	3246.48	12546.6	3.86468	0.258754
Brapa_ESTC026487	AT5G09870	Symbols: CESA5 | CESA5 (CELLULASE SYNTHASE 5); transferase, transferring glycosyl groups | chr5:3073357-3077975 FORWARD	575.489	2223.24	3.86322	0.258851
Brapa_ESTC031819	AT3G60160	Symbols: ATMRP9 | ATMRP9 (Arabidopsis thaliana multidrug resistance-associated protein 9) | chr3:22234804-22240170 REVERSE	266.219	1028.34	3.86276	0.258882
Brapa_ESTC013801	AT2G35450	| Symbols: | hydrolase | chr2:14910280-14912440 REVERSE	741.989	2865.15	3.86145	0.25897
Brapa_ESTC015709	AT2G31490	Symbols: | similar to Os01g0750800 [Oryza sativa (japonica cultivar-group)] (GB:NP_001044256.1); similar to unknown protein [Oryza sativa (japonica cultivar-group)] (GB:BAB63534.1) | chr2:13419137-13420079 FORWARD	2633.28	10166.4	3.86074	0.259018
Brapa_ESTC006778	AT2G26900	Symbols: | bile acid:sodium symporter family protein | chr2:11482234-11484948 REVERSE	4392.73	16957.4	3.86033	0.259045
Brapa_ESTC021013	AT2G31710	Symbols: | similar to unknown protein [Arabidopsis thaliana] (TAIR:AT1G05780.1); similar to Os04g0612900 [Oryza sativa (japonica cultivar-group)] (GB:NP_001053850.1) | chr2:13489134-13489972 REVERSE	709.414	2737.38	3.85865	0.259158
Brapa_ESTC026092	AT4G34830	| Symbols: | binding | chr4:16599981-16605999 REVERSE	669.089	2581.08	3.8576	0.259228
Brapa_ESTC022739	AT3G01500	Symbols: CA1 | CA1 (CARBONIC ANHYDRASE 1); carbonate dehydratase/ zinc ion binding | chr3:195180-196723 REVERSE	1548.49	5971.38	3.85626	0.259319
Brapa_ESTC038085	AT1G20850	Symbols: XCP2 | XCP2 (XYLEM CYSTEINE PEPTIDASE 2); cysteine-type peptidase/ peptidase | chr1:7252197-7253526 FORWARD	2879.89	11105	3.85605	0.259333
Brapa_ESTC014574	AT3G48090	Symbols: EDS1 | EDS1 (ENHANCED DISEASE SUSCEPTIBILITY 1); signal transducer/ triacylglycerol lipase | chr3:17766538-17768277 REVERSE	1443.77	5565.12	3.85458	0.259432
Brapa_ESTC011500	AT4G39900	| Symbols: | unknown protein | chr4:18508563-18510283 REVERSE	1637.3	6310.48	3.8542	0.259457
Brapa_ESTC000709	AT1G50900	Symbols: | similar to unnamed protein product [Ostreococcus tauri] (GB:CAL57548.1); similar to Os07g0520800 [Oryza sativa (japonica cultivar-group)] (GB:NP_001059804.1); contains InterPro domain Ankyrin; (InterPro:IPR002110) | chr1:18869940-18870682 FORWARD	2131.78	8216.17	3.85414	0.259462
Brapa_ESTC028328	AT1G07010	Symbols: | calcineurin-like phosphoesterase family protein | chr1:2152948-2154967 FORWARD	1124.83	4331.59	3.85088	0.259681
Brapa_ESTC046266	AT1G26670	Symbols: VTI12, ATVTI12, VTI1B | VTI12 (VESICAL TRANSPORT V-SNARE 12, vesical transport v-SNARE 12); SNARE binding / receptor | chr1:9216090-9217780 FORWARD	1531.46	5891.25	3.84682	0.259955
Brapa_ESTC010940	AT4G25640	Symbols: | MATE efflux family protein | chr4:13076962-13078974 REVERSE	5563.36	21384.8	3.84386	0.260155
Brapa_ESTC011076	AT3G44150	Symbols: | similar to unknown protein [Arabidopsis thaliana] (TAIR:AT3G11800.1); similar to expp1 protein precursor [Solanum tuberosum] (GB:CAJ77501.1); contains domain FAMILY NOT NAMED (PTHR21454); contains domain SUBFAMILY NOT NAMED (PTHR21454:SF1) | chr3:15898604-15899715 FORWARD	964.839	3704.68	3.83969	0.260438
Brapa_ESTC004795	AT5G55710	Symbols: | similar to tic20 protein-related [Arabidopsis thaliana] (TAIR:AT2G47840.1); similar to Os02g0726600 [Oryza sativa (japonica cultivar-group)] (GB:NP_001047992.1); similar to hypothetical protein Tery_3886 [Trichodesmium erythraeum IMS101] (GB:YP_723396.1) | chr5:22572221-22572850 REVERSE	2491.8	9561.74	3.83728	0.260601
Brapa_ESTC048726	no_hits_f	---------	2940.86	11270.2	3.83228	0.260941
Brapa_ESTC019974	AT1G33811	Symbols: | GDSL-motif lipase/hydrolase family protein | chr1:12267898-12269670 FORWARD	907.899	3478.9	3.83181	0.260973
Brapa_ESTC024058	AT1G68820	Symbols: | membrane protein, putative | chr1:25869515-25872463 FORWARD	3060.39	11717.4	3.82873	0.261183
Brapa_ESTC032068	AT1G15220	| Symbols: ATCCMH | ATCCMH | chr1:5240466-5241112 REVERSE	1221.57	4675.62	3.82755	0.261264
Brapa_ESTC047364	AT3G51950	| Symbols: | RNA binding | chr3:19289222-19291385 REVERSE	807.916	3091.25	3.8262	0.261356
Brapa_ESTC002228	AT5G08650	Symbols: | GTP-binding protein LepA, putative | chr5:2806534-2813221 REVERSE	966.704	3698.32	3.8257	0.26139
Brapa_ESTC051682	AT4G27450	Symbols: | similar to unknown protein [Arabidopsis thaliana] (TAIR:AT3G15450.1); similar to unknown [Glycine max] (GB:AAG00940.1); contains domain no description (G3D.3.60.20.10); contains domain N-terminal nucleophile aminohydrolases (Ntn hydrolases) (SSF56235) | chr4:13727671-13728689 REVERSE	3367.19	12877.1	3.82429	0.261487
Brapa_ESTC006937	AT4G27830	Symbols: | glycosyl hydrolase family 1 protein | chr4:13861800-13864495 REVERSE	946.638	3620.19	3.82426	0.261488
Brapa_ESTC023863	AT5G10870	Symbols: ATCM2 | ATCM2 (CHORISMATE MUTASE 2); chorismate mutase | chr5:3430692-3432273 REVERSE	2182.36	8339.4	3.82128	0.261693
Brapa_ESTC016316	AT2G34640	Symbols: PTAC12 | PTAC12 (PLASTID TRANSCRIPTIONALLY ACTIVE12) | chr2:14589140-14591424 REVERSE	653.544	2495.23	3.818	0.261917
Brapa_ESTC036652	AT1G25460	Symbols: | oxidoreductase family protein | chr1:8942798-8944231 FORWARD	901.792	3438.16	3.81259	0.262289
Brapa_ESTC014248	AT4G14365	Symbols: | zinc finger (C3HC4-type RING finger) family protein / ankyrin repeat family protein | chr4:8271656-8273681 REVERSE	441.096	1681.44	3.81196	0.262332
Brapa_ESTC042458	AT3G02380	Symbols: COL2 | COL2 (CONSTANS-LIKE 2); transcription factor/ zinc ion binding | chr3:487445-488631 REVERSE	11044	42067.7	3.8091	0.262529
Brapa_ESTC016473	AT3G47650	Symbols: | bundle-sheath defective protein 2 family / bsd2 family | chr3:17580561-17581247 FORWARD	404.525	1540.11	3.80721	0.26266
Brapa_ESTC012982	AT4G21210	Symbols: | Identical to UPF0085 protein At4g21210 [Arabidopsis Thaliana] (GB:O49562); similar to unknown protein [Arabidopsis thaliana] (TAIR:AT3G01200.1); similar to putative ATP/GTP-binding protein [Oryza sativa (japonica cultivar-group)] (GB:BAC45149.1); contains InterPro domain Protein of unknown function DUF299; (InterPro:IPR005177) | chr4:11307012-11308597 FORWARD	3237.17	12323.7	3.80694	0.262678
Brapa_ESTC001843	AT1G78630	Symbols: EMB1473 | EMB1473 (EMBRYO DEFECTIVE 1473); structural constituent of ribosome | chr1:29580890-29582299 FORWARD	5478.77	20851	3.80578	0.262758
Brapa_ESTC008271	AT1G11755	Symbols: | similar to hypothetical protein MtrDRAFT_AC126792g27v1 [Medicago truncatula] (GB:ABE94701.1); contains domain FAMILY NOT NAMED (PTHR21528); contains domain Undecaprenyl diphosphate synthase (SSF64005); contains domain no description (G3D.3.40.1180.10); contains domain SUBFAMILY NOT NAMED (PTHR21528:SF2) | chr1:3969987-3971488 REVERSE	1226.5	4664.93	3.80345	0.262919
Brapa_ESTC028554	no_hits_f	---------	659.406	2507.38	3.80248	0.262986
Brapa_ESTC008196	AT1G18650	Symbols: | glycosyl hydrolase family protein 17 | chr1:6419028-6420405 REVERSE	626.822	2383.1	3.80188	0.263028
Brapa_ESTC008767	AT4G29210	Symbols: GGT3 | GGT3 (GAMMA-GLUTAMYL TRANSPEPTIDASE 3); gamma-glutamyltransferase | chr4:14400996-14402758 FORWARD	352.091	1337.73	3.79939	0.2632
Brapa_ESTC040015	AT1G25580	Symbols: ANAC008 | ANAC008 (Arabidopsis NAC domain containing protein 8); transcription factor | chr1:8997051-8999587 REVERSE	2639.03	10023.5	3.79818	0.263284
Brapa_ESTC043097	AT3G16000	Symbols: MFP1 | MFP1 (MAR BINDING FILAMENT-LIKE PROTEIN 1) | chr3:5431047-5433619 REVERSE	3339.58	12680.7	3.79709	0.263359
Brapa_ESTC048744	AT2G27450	Symbols: ATNLP1, CPA, NLP1 | NLP1 (NITRILASE-LIKE PROTEIN 1); hydrolase, acting on carbon-nitrogen (but not peptide) bonds | chr2:11744744-11746655 REVERSE	587.926	2228.8	3.79095	0.263786
Brapa_ESTC008944	AT5G03350	Symbols: | legume lectin family protein | chr5:815803-816627 REVERSE	590.583	2238.86	3.79093	0.263787
Brapa_ESTC032777	no_hits_f	---------	422.736	1602.16	3.78998	0.263854
Brapa_ESTC038909	AT3G59190	| Symbols: | F-box family protein | chr3:21895717-21897078 FORWARD	321.528	1217.51	3.78664	0.264087
Brapa_ESTC008515	AT4G29850	Symbols: | similar to unknown protein [Arabidopsis thaliana] (TAIR:AT2G19350.1); similar to unknown [Gymnadenia conopsea] (GB:ABD66514.1); contains InterPro domain Protein of unknown function DUF872, eukaryotic; (InterPro:IPR008590) | chr4:14601824-14602880 REVERSE	3084.1	11674.2	3.78529	0.264181
Brapa_ESTC037994	AT1G74670	Symbols: | gibberellin-responsive protein, putative | chr1:28057039-28057554 FORWARD	1615.73	6112.85	3.78334	0.264317
Brapa_ESTC039375	AT1G08450	Symbols: CRT3 | CRT3 (CALRETICULIN 3); calcium ion binding | chr1:2668005-2671797 REVERSE	4121.19	15583.8	3.78138	0.264453
Brapa_ESTC011484	AT5G05270	Symbols: | chalcone-flavanone isomerase family protein | chr5:1563544-1564828 FORWARD	4839.43	18295.6	3.78053	0.264513
Brapa_ESTC014811	AT4G31020	Symbols: | similar to unknown protein [Arabidopsis thaliana] (TAIR:AT2G24320.1); similar to Esterase/lipase/thioesterase [Medicago truncatula] (GB:ABD32255.1); similar to Os02g0796600 [Oryza sativa (japonica cultivar-group)] (GB:NP_001048390.1); contains InterPro domain Esterase/lipase/thioesterase; (InterPro:IPR000379) | chr4:15108838-15110085 REVERSE	1297.38	4894.66	3.77273	0.26506
Brapa_ESTC006183	AT2G38780	| Symbols: | binding | chr2:16217942-16221188 FORWARD	702.174	2647.79	3.77085	0.265192
Brapa_ESTC017111	AT1G54570	Symbols: | esterase/lipase/thioesterase family protein | chr1:20384316-20388620 REVERSE	1008.95	3803.47	3.76973	0.265271
Brapa_ESTC011470	AT1G36390	Symbols: | co-chaperone grpE family protein | chr1:13703023-13704736 REVERSE	1806.74	6809.82	3.76912	0.265314
Brapa_ESTC015662	AT4G39150	Symbols: | DNAJ heat shock N-terminal domain-containing protein | chr4:18233645-18235734 REVERSE	1915.45	7212.91	3.76565	0.265559
Brapa_ESTC023141	AT2G21330	Symbols: | fructose-bisphosphate aldolase | chr2:9135497-9137233 REVERSE	2985.51	11241.9	3.76549	0.26557
Brapa_ESTC004753	AT5G12440	Symbols: | zinc finger (CCCH-type) family protein | chr5:4035892-4038311 REVERSE	419.169	1578.19	3.76504	0.265601
Brapa_ESTC026569	AT2G03750	Symbols: | sulfotransferase family protein | chr2:1147965-1149020 REVERSE	7855	29553.4	3.76237	0.26579
Brapa_ESTC002083	AT3G44260	Symbols: | CCR4-NOT transcription complex protein, putative | chr3:15963200-15964042 REVERSE	2251.55	8469.84	3.76178	0.265831
Brapa_ESTC041648	AT2G33760	Symbols: | pentatricopeptide (PPR) repeat-containing protein | chr2:14282876-14284627 FORWARD	391.824	1472.68	3.75852	0.266062
Brapa_ESTC031399	AT5G24314	Symbols: PDE225, PTAC7 | PDE225/PTAC7 (PIGMENT DEFECTIVE 225) | chr5:8277753-8279102 FORWARD	4697.34	17651.5	3.75777	0.266116
Brapa_ESTC013321	AT3G21560	Symbols: UGT84A2 | UGT84A2; UDP-glycosyltransferase/ sinapate 1-glucosyltransferase | chr3:7595890-7597380 FORWARD	1594.42	5990.78	3.75734	0.266146
Brapa_ESTC020951	AT4G01050	Symbols: | hydroxyproline-rich glycoprotein family protein | chr4:455874-458175 FORWARD	2850.57	10699.5	3.75346	0.266421
Brapa_ESTC028355	AT4G10080	Symbols: | similar to unknown protein [Arabidopsis thaliana] (TAIR:AT4G13530.1); similar to unknown protein [Oryza sativa (japonica cultivar-group)] (GB:BAD82228.1); similar to Os02g0558500 [Oryza sativa (japonica cultivar-group)] (GB:NP_001047145.1) | chr4:6300450-6302556 REVERSE	1444.63	5421.2	3.75266	0.266478
Brapa_ESTC007790	AT4G10130	Symbols: | DNAJ heat shock N-terminal domain-containing protein | chr4:6320955-6321479 REVERSE	708.77	2658.47	3.75082	0.266608
Brapa_ESTC032428	AT2G27480	| Symbols: | calcium ion binding | chr2:11753889-11754963 FORWARD	478.184	1792.93	3.74946	0.266705
Brapa_ESTC049098	AT5G59050	Symbols: | similar to unknown protein [Arabidopsis thaliana] (TAIR:AT3G54000.1); similar to IMP dehydrogenase/GMP reductase [Medicago truncatula] (GB:ABD33149.1) | chr5:23856720-23859745 REVERSE	368.31	1380.79	3.74899	0.266739
Brapa_ESTC010622	AT5G36160	Symbols: | aminotransferase-related | chr5:14250491-14252359 REVERSE	699.226	2618.42	3.74474	0.267041
Brapa_ESTC042080	AT2G26900	Symbols: | bile acid:sodium symporter family protein | chr2:11482234-11484948 REVERSE	7526.12	28171.9	3.74322	0.26715
Brapa_ESTC012997	AT1G22700	Symbols: | tetratricopeptide repeat (TPR)-containing protein | chr1:8028312-8029867 REVERSE	1425.01	5333.19	3.74256	0.267197
Brapa_ESTC002144	AT3G21270	Symbols: ADOF2 | ADOF2 (Arabidopsis dof zinc finger protein 2); DNA binding / transcription factor | chr3:7474940-7475554 FORWARD	517.62	1937.13	3.74238	0.26721
Brapa_ESTC023470	AT4G17560	Symbols: | ribosomal protein L19 family protein | chr4:9780356-9781765 FORWARD	4897.75	18326.4	3.7418	0.267251
Brapa_ESTC012961	AT2G29340	Symbols: | short-chain dehydrogenase/reductase (SDR) family protein | chr2:12604208-12606086 FORWARD	5161.15	19301.6	3.73979	0.267395
Brapa_ESTC019147	AT1G15820	Symbols: CP24, LHCB6 | LHCB6 (LIGHT HARVESTING COMPLEX PSII); chlorophyll binding | chr1:5446680-5447671 REVERSE	3027.35	11313.9	3.73723	0.267578
Brapa_ESTC017637	AT5G11020	| Symbols: | kinase | chr5:3486440-3488984 REVERSE	1855.99	6935.38	3.73676	0.267612
Brapa_ESTC018502	AT3G25130	Symbols: | similar to heat shock protein binding [Arabidopsis thaliana] (TAIR:AT3G47270.1); similar to expressed protein [Oryza sativa (japonica cultivar-group)] (GB:ABA93516.1) | chr3:9152441-9153661 FORWARD	1698.08	6345.12	3.73664	0.26762
Brapa_ESTC001984	AT5G60800	Symbols: | heavy-metal-associated domain-containing protein | chr5:24478342-24479690 REVERSE	653.567	2441.88	3.73624	0.267649
Brapa_ESTC021268	AT1G51560	| Symbols: | FMN binding | chr1:19123568-19125527 REVERSE	2054.66	7667.25	3.73164	0.267979
Brapa_ESTC006124	AT5G64810	Symbols: WRKY51 | WRKY51 (WRKY DNA-binding protein 51); transcription factor | chr5:25925641-25926913 FORWARD	312.403	1165.5	3.73076	0.268042
Brapa_ESTC037212	AT3G61700	Symbols: | similar to unknown protein [Arabidopsis thaliana] (TAIR:AT2G46420.1); similar to uncharacterized plant-specific domain TIGR01589 family protein [Solanum demissum] (GB:AAU93592.2); contains InterPro domain Conserved hypothetical protein 1589, plant; (InterPro:IPR006476) | chr3:22847389-22849778 FORWARD	456.953	1704.68	3.73054	0.268058
Brapa_ESTC016696	AT5G22860	Symbols: | serine carboxypeptidase S28 family protein | chr5:7639910-7642948 REVERSE	399.624	1490.19	3.72898	0.26817
Brapa_ESTC023391	AT1G15890	Symbols: | disease resistance protein (CC-NBS-LRR class), putative | chr1:5461400-5463955 FORWARD	8627.48	32136.1	3.72485	0.268467
Brapa_ESTC034380	AT3G11230	| Symbols: | yippee family protein | chr3:3516689-3518199 FORWARD	1350.53	5023.82	3.71989	0.268825
Brapa_ESTC023798	AT5G66190	Symbols: ATLFNR1 | ATLFNR1 (LEAF FNR 1); NADPH dehydrogenase/ oxidoreductase | chr5:26468429-26470238 REVERSE	9816.73	36480.2	3.71613	0.269097
Brapa_ESTC051083	no_hits_f	---------	275.332	1022.43	3.71344	0.269292
Brapa_ESTC045568	AT5G13370	Symbols: | auxin-responsive GH3 family protein | chr5:4286999-4289427 FORWARD	1366.99	5075.42	3.71284	0.269335
Brapa_ESTC001647	AT5G39670	Symbols: | calcium-binding EF hand family protein | chr5:15900498-15901112 FORWARD	1126.2	4179.81	3.71143	0.269438
Brapa_ESTC018415	AT3G56480	Symbols: | myosin heavy chain-related | chr3:20947459-20949965 REVERSE	587.737	2180.89	3.71066	0.269494
Brapa_ESTC050916	AT5G24430	Symbols: | calcium-dependent protein kinase, putative / CDPK, putative | chr5:8339393-8342916 REVERSE	327.315	1214.5	3.71049	0.269506
Brapa_ESTC038961	AT5G59540	Symbols: | oxidoreductase, 2OG-Fe(II) oxygenase family protein | chr5:24013519-24014802 REVERSE	1414.81	5240.3	3.70389	0.269986
Brapa_ESTC050307	no_hits_f	---------	616.742	2283.91	3.70319	0.270038
Brapa_ESTC008185	AT1G45191	Symbols: | glycosyl hydrolase family 1 protein | chr1:17118484-17121516 FORWARD	1625.04	6017.65	3.70308	0.270046
Brapa_ESTC034031	AT5G22090	| Symbols: | similar to unknown protein [Arabidopsis thaliana]	1280.45	4741.38	3.7029	0.270059
Brapa_ESTC004777	AT2G44150	Symbols: ASHH3 | SET domain-containing protein (ASHH3) | chr2:18265939-18268079 FORWARD	351.442	1301.2	3.70246	0.270091
Brapa_ESTC013017	AT3G17609	| Symbols: HYH | HYH (HY5-HOMOLOG) | chr3:6023977-6024591 FORWARD	2726.85	10088	3.69951	0.270306
Brapa_ESTC017154	AT2G35650	Symbols: CSLA07, ATCSLA7, CSLA7, ATCSLA07 | ATCSLA07 (CELLULOSE SYNTHASE LIKE); transferase, transferring glycosyl groups | chr2:14992704-14995266 FORWARD	947.18	3503.47	3.69884	0.270355
Brapa_ESTC029164	AT2G45560	Symbols: CYP76C1 | CYP76C1 (cytochrome P450, family 76, subfamily C, polypeptide 1); heme binding / iron ion binding / monooxygenase | chr2:18784314-18785428 REVERSE	743.915	2751.54	3.69873	0.270363
Brapa_ESTC013865	AT1G10960	Symbols: ATFD1 | ATFD1 (FERREDOXIN 1); electron carrier/ iron ion binding | chr1:3664445-3664891 FORWARD	755.281	2793.22	3.69825	0.270398
Brapa_ESTC024612	AT5G65210	Symbols: | DNA binding / calmodulin binding / transcription factor | chr5:26076257-26077975 FORWARD	1723.55	6368.9	3.69522	0.27062
Brapa_ESTC048745	no_hits_f	---------	3786.19	13988.7	3.69466	0.270661
Brapa_ESTC048161	no_hits_f	---------	2250.75	8311.7	3.69286	0.270793
Brapa_ESTC030992	no_hits_f	---------	325.861	1202.56	3.69041	0.270973
Brapa_ESTC032182	AT4G14370	Symbols: | disease resistance protein (TIR-NBS-LRR class), putative | chr4:8274309-8283259 REVERSE	536.123	1977.94	3.68934	0.271051
Brapa_ESTC012756	AT5G47190	Symbols: | ribosomal protein L19 family protein | chr5:19181659-19183291 REVERSE	3970.35	14645.5	3.68872	0.271097
Brapa_ESTC017639	AT1G34750	Symbols: | protein phosphatase 2C, putative / PP2C, putative | chr1:12736364-12737705 REVERSE	1628.37	6005.76	3.6882	0.271135
Brapa_ESTC016910	AT5G35520	Symbols: | kinetochore protein-related | chr5:13718626-13720719 FORWARD	1083.55	3995.88	3.68777	0.271167
Brapa_ESTC021243	AT4G28820	Symbols: | zinc finger (HIT type) family protein | chr4:14230821-14232293 REVERSE	1074.91	3964.01	3.68776	0.271167
Brapa_ESTC003819	AT3G06260	Symbols: GATL4 | GATL4 (Galacturonosyltransferase-like 4); polygalacturonate 4-alpha-galacturonosyltransferase/ transferase, transferring glycosyl groups / transferase, transferring hexosyl groups | chr3:1893810-1894865 REVERSE	1372.54	5060.8	3.68718	0.27121
Brapa_ESTC021141	AT1G61520	Symbols: LHCA3 | LHCA3 (Photosystem I light harvesting complex gene 3) | chr1:22704158-22704814 FORWARD	16064.7	59205.2	3.68542	0.271339
Brapa_ESTC010929	AT2G21870	Symbols: | Identical to Probable ATP synthase 24 kDa subunit, mitochondrial precursor (EC 3.6.3.14) [Arabidopsis Thaliana] (GB:Q9SJ12;GB:Q8LBN3); similar to hypothetical protein MtrDRAFT_AC155898g5v1 [Medicago truncatula] (GB:ABE87707.1) | chr2:9327536-9329698 REVERSE	1970.7	7259.29	3.68361	0.271473
Brapa_ESTC005950	AT1G26940	Symbols: | peptidyl-prolyl cis-trans isomerase cyclophilin-type family protein | chr1:9343180-9344949 FORWARD	319.498	1175.72	3.6799	0.271747
Brapa_ESTC028108	no_hits_f	---------	433.914	1596.75	3.67988	0.271748
Brapa_ESTC046340	AT5G56250	Symbols: | similar to unknown protein [Arabidopsis thaliana] (TAIR:AT5G56240.1); similar to Os04g0471400 [Oryza sativa (japonica cultivar-group)] (GB:NP_001053056.1); similar to hypothetical protein MtrDRAFT_AC146329g11v1 [Medicago truncatula] (GB:ABE91348.1) | chr5:22786144-22789095 REVERSE	547.656	2014.18	3.67782	0.2719
Brapa_ESTC019192	AT3G07080	| Symbols: | membrane protein | chr3:2241366-2242940 FORWARD	2920.38	10736.7	3.67647	0.272
Brapa_ESTC011810	AT1G12780	Symbols: UGE1 | UGE1 (UDP-D-glucose/UDP-D-galactose 4-epimerase 1); UDP-glucose 4-epimerase/ protein dimerization | chr1:4356122-4358118 REVERSE	659.698	2424.18	3.67468	0.272132
Brapa_ESTC022981	AT5G23920	Symbols: | similar to unknown protein [Arabidopsis thaliana] (TAIR:AT5G52420.1); similar to unknown [Xerophyta humilis] (GB:AAT45003.1) | chr5:8073366-8074121 REVERSE	2924.77	10743	3.67311	0.272249
Brapa_ESTC008511	AT2G02540	Symbols: ATHB21, ZFHD4 | ATHB21/ZFHD4 (ZINC FINGER HOMEODOMAIN 4); DNA binding / transcription factor | chr2:684301-685233 FORWARD	505.963	1858.16	3.67252	0.272292
Brapa_ESTC022987	AT1G27630	| Symbols: | cyclin family protein | chr1:9611634-9613954 FORWARD	799.434	2935.62	3.67212	0.272322
Brapa_ESTC002847	AT5G18470	Symbols: | curculin-like (mannose-binding) lectin family protein | chr5:6127954-6129195 FORWARD	1623.75	5961.98	3.67174	0.272351
Brapa_ESTC028188	AT1G76185	Symbols: | similar to unknown protein [Arabidopsis thaliana] (TAIR:AT1G20460.1); similar to Os03g0227500 [Oryza sativa (japonica cultivar-group)] (GB:NP_001049446.1); similar to Os03g0669600 [Oryza sativa (japonica cultivar-group)] (GB:NP_001050865.1) | chr1:28595391-28596051 FORWARD	2865.12	10516.8	3.67063	0.272433
Brapa_ESTC050308	no_hits_f	---------	1697.68	6230.07	3.66976	0.272498
Brapa_ESTC016610	AT2G17500	| Symbols: | auxin:hydrogen symporter | chr2:7614145-7616072 FORWARD	946.395	3471.47	3.6681	0.272621
Brapa_ESTC002377	AT3G08740	Symbols: | elongation factor P (EF-P) family protein | chr3:2654794-2656160 REVERSE	2603.38	9545.56	3.6666	0.272732
Brapa_ESTC035528	AT2G20625	Symbols: | similar to unknown protein [Arabidopsis thaliana] (TAIR:AT2G20620.1); contains InterPro domain Protein of unknown function DUF626, Arabidopsis thaliana; (InterPro:IPR006462) | chr2:8903235-8904299 REVERSE	5772.15	21157	3.66536	0.272825
Brapa_ESTC044287	AT4G21970	Symbols: | similar to unknown protein [Arabidopsis thaliana] (TAIR:AT4G04630.1); similar to Protein of unknown function, DUF584 [Medicago truncatula] (GB:ABE91657.1); contains InterPro domain Protein of unknown function DUF584; (InterPro:IPR007608) | chr4:11653645-11654476 FORWARD	836.161	3063.93	3.66428	0.272905
Brapa_ESTC008398	AT1G49740	| Symbols: | phospholipase C | chr1:18411396-18413136 FORWARD	1033.92	3787.92	3.66365	0.272952
Brapa_ESTC015342	AT4G29720	Symbols: ATPAO5 | ATPAO5 (POLYAMINE OXIDASE 5); amine oxidase | chr4:14553462-14555063 REVERSE	1108.33	4056.58	3.66008	0.273218
Brapa_ESTC000715	AT5G47820	Symbols: FRA1 | FRA1 (FRAGILE FIBER 1); microtubule motor | chr5:19383731-19389455 FORWARD	290.559	1063.36	3.6597	0.273246
Brapa_ESTC039513	AT3G22470	Symbols: | pentatricopeptide (PPR) repeat-containing protein | chr3:7966073-7967932 REVERSE	613.14	2243.1	3.65838	0.273345
Brapa_ESTC050847	no_hits_f	---------	809.019	2959.43	3.65805	0.27337
Brapa_ESTC036216	no_hits_f	---------	1429.27	5227.51	3.65747	0.273413
Brapa_ESTC002869	AT2G23430	Symbols: KRP1, ICK1 | ICK1 (KIP-RELATED PROTEIN 1) | chr2:9984100-9985001 REVERSE	570.12	2085.05	3.65721	0.273432
Brapa_ESTC040924	AT1G52870	Symbols: | peroxisomal membrane protein-related | chr1:19689524-19691346 FORWARD	4830.6	17656.8	3.6552	0.273583
Brapa_ESTC035557	AT3G56480	Symbols: | myosin heavy chain-related | chr3:20947459-20949965 REVERSE	7889.62	28824.8	3.65351	0.273709
Brapa_ESTC002667	AT3G54050	Symbols: | fructose-1,6-bisphosphatase, putative / D-fructose-1,6-bisphosphate 1-phosphohydrolase, putative / FBPase, putative | chr3:20027929-20029505 FORWARD	715.148	2611.35	3.65148	0.273861
Brapa_ESTC048328	no_hits_f	---------	1168.73	4262.53	3.64715	0.274187
Brapa_ESTC022665	AT1G07440	Symbols: | tropinone reductase, putative / tropine dehydrogenase, putative | chr1:2286433-2287662 REVERSE	745.423	2718.58	3.64703	0.274196
Brapa_ESTC020017	no_hits_f	---------	1936.84	7059.2	3.6447	0.274371
Brapa_ESTC010124	AT4G33740	Symbols: | similar to unknown protein [Arabidopsis thaliana] (TAIR:AT2G22795.1); similar to conserved hypothetical protein [Medicago truncatula] (GB:ABE84763.1) | chr4:16187387-16188070 FORWARD	2707.14	9860.73	3.64249	0.274537
Brapa_ESTC031099	AT3G02250	Symbols: | similar to unknown protein [Arabidopsis thaliana] (TAIR:AT5G15740.1); similar to hypothetical protein [Cleome spinosa] (GB:ABD96934.1); similar to Os06g0284200 [Oryza sativa (japonica cultivar-group)] (GB:NP_001057398.1); similar to hypothetical protein [Cleome spinosa] (GB:ABD96844.1); contains InterPro domain Protein of unknown function DUF246, plant; (InterPro:IPR004348) | chr3:4241…	444.568	1619.08	3.64192	0.274581
Brapa_ESTC025900	AT2G23150	Symbols: ATNRAMP3, NRAMP3 | NRAMP3 (NRAMP metal ion transporter 3); manganese ion transporter/ metal ion transporter | chr2:9863502-9865645 REVERSE	417.771	1521.2	3.64123	0.274633
Brapa_ESTC025966	AT3G20320	Symbols: TGD2 | TGD2 (TRIGALACTOSYLDIACYLGLYCEROL2) | chr3:7087663-7089646 REVERSE	726.287	2643.73	3.64006	0.274721
Brapa_ESTC050003	AT1G78160	Symbols: APUM7 | APUM7 (ARABIDOPSIS PUMILIO 7); RNA binding | chr1:29412793-29415077 FORWARD	398.411	1450.12	3.63976	0.274743
Brapa_ESTC022714	AT3G04890	Symbols: | similar to unknown protein [Arabidopsis thaliana] (TAIR:AT2G46100.1); similar to unnamed protein product [Ostreococcus tauri] (GB:CAL53979.1); contains domain NTF2-like (SSF54427) | chr3:1347714-1349072 FORWARD	316.585	1152.29	3.63975	0.274744
Brapa_ESTC032946	AT4G30950	Symbols: FADC, SFD4, FAD6 | FAD6 (FATTY ACID DESATURASE 6); omega-6 fatty acid desaturase | chr4:15057284-15059679 REVERSE	1253.08	4560.12	3.63913	0.274791
Brapa_ESTC045701	AT5G14640	Symbols: | protein kinase family protein | chr5:4719353-4721775 REVERSE	959.23	3486.17	3.63434	0.275153
Brapa_ESTC009343	AT1G26500	Symbols: | pentatricopeptide (PPR) repeat-containing protein | chr1:9158367-9159884 FORWARD	422.479	1534.47	3.63206	0.275326
Brapa_ESTC017406	AT5G20790	Symbols: | similar to unknown protein [Arabidopsis thaliana] (TAIR:AT3G43110.1); similar to conserved hypothetical protein [Medicago truncatula] (GB:ABE90972.1) | chr5:7040048-7040629 REVERSE	934.809	3393.05	3.62967	0.275507
Brapa_ESTC012250	AT1G76990	Symbols: ACR3 | ACR3 (ACT Domain Repeat 3) | chr1:28938281-28940073 FORWARD	1364.06	4950.16	3.62899	0.275559
Brapa_ESTC047357	AT1G55340	Symbols: | similar to unknown protein [Arabidopsis thaliana] (TAIR:AT3G03880.1); similar to unknown protein [Oryza sativa (japonica cultivar-group)] (GB:AAV67822.1); similar to Os03g0807200 [Oryza sativa (japonica cultivar-group)] (GB:NP_001051641.1); contains InterPro domain Protein of unknown function DUF1639; (InterPro:IPR012438) | chr1:20656271-20657135 FORWARD	389.246	1411.08	3.62516	0.27585
Brapa_ESTC046720	AT5G67520	Symbols: | adenylylsulfate kinase, putative | chr5:26956568-26958068 FORWARD	396.152	1435.64	3.62396	0.275941
Brapa_ESTC001675	AT4G17810	Symbols: | nucleic acid binding / transcription factor/ zinc ion binding | chr4:9906931-9907545 FORWARD	442.213	1601.14	3.62074	0.276186
Brapa_ESTC049041	no_hits_f	---------	5132.1	18547.2	3.61396	0.276705
Brapa_ESTC007680	AT1G32060	Symbols: PRK | PRK (PHOSPHORIBULOKINASE); ATP binding / phosphoribulokinase/ protein binding | chr1:11532648-11534386 FORWARD	5068.72	18315	3.61334	0.276752
Brapa_ESTC020447	AT3G53350	Symbols: | myosin heavy chain-related | chr3:19791168-19792533 REVERSE	1109.43	4008.38	3.61301	0.276778
Brapa_ESTC008900	AT5G53340	Symbols: | transferase, transferring hexosyl groups | chr5:21658271-21660421 REVERSE	590.021	2131.17	3.61202	0.276853
Brapa_ESTC017869	AT3G45850	Symbols: | kinesin motor protein-related | chr3:16866799-16871935 REVERSE	986.828	3564.37	3.61195	0.276859
Brapa_ESTC014296	AT2G38470	Symbols: ATWRKY33, WRKY33 | WRKY33 (WRKY DNA-binding protein 33); transcription factor | chr2:16115554-16117617 FORWARD	2457.99	8877.99	3.61189	0.276863
Brapa_ESTC040535	no_hits_f	---------	479.81	1732.22	3.61022	0.276991
Brapa_ESTC035871	AT1G10522	Symbols: | similar to conserved hypothetical protein [Medicago truncatula] (GB:ABE91480.1); similar to Os09g0382400 [Oryza sativa (japonica cultivar-group)] (GB:NP_001063064.1) | chr1:3470010-3471292 FORWARD	9156.31	33036.5	3.60806	0.277157
Brapa_ESTC027596	AT5G05140	Symbols: | transcription elongation factor-related | chr5:1520354-1522298 FORWARD	638.101	2302.29	3.60803	0.277159
Brapa_ESTC031516	AT5G48630	Symbols: | cyclin family protein | chr5:19738889-19740426 REVERSE	2233.79	8058.28	3.60745	0.277204
Brapa_ESTC026859	AT3G05165	Symbols: | carbohydrate transporter/ sugar porter | chr3:1458293-1462743 REVERSE	1222.63	4409.82	3.60683	0.277252
Brapa_ESTC027816	AT5G28750	Symbols: | thylakoid assembly protein, putative | chr5:10784146-10785681 REVERSE	1874.34	6758.26	3.60567	0.277341
Brapa_ESTC001292	AT4G33000	Symbols: ATCBL10, CBL10 | CBL10 (calcineurin B-like protein 10); calcium ion binding | chr4:15924824-15926401 FORWARD	1371.14	4940.38	3.60312	0.277537
Brapa_ESTC002173	AT3G03160	Symbols: | similar to unknown protein [Arabidopsis thaliana] (TAIR:AT5G17190.1); similar to Erwinia induced protein 2 [Solanum tuberosum] (GB:AAO32066.1) | chr3:729883-730275 FORWARD	3341.84	12034.3	3.6011	0.277693
Brapa_ESTC005387	AT5G26670	Symbols: | pectinacetylesterase, putative | chr5:9318459-9320819 FORWARD	347.371	1248.92	3.59535	0.278137
Brapa_ESTC017688	AT4G25640	Symbols: | MATE efflux family protein | chr4:13076962-13078974 REVERSE	2248.74	8080.15	3.59319	0.278304
Brapa_ESTC051266	no_hits_f	---------	2256.38	8101.9	3.59066	0.2785
Brapa_ESTC047948	AT1G49320	Symbols: | BURP domain-containing protein | chr1:18250109-18251485 FORWARD	2905.63	10416.4	3.5849	0.278948
Brapa_ESTC013465	AT1G76790	Symbols: | O-methyltransferase family 2 protein | chr1:28827249-28828524 REVERSE	2722.74	9749.33	3.58071	0.279275
Brapa_ESTC026670	AT1G01950	Symbols: | armadillo/beta-catenin repeat family protein / kinesin motor family protein | chr1:325473-330403 FORWARD	2173.22	7778	3.57902	0.279406
Brapa_ESTC047663	no_hits_f	---------	1318.25	4717.78	3.57882	0.279422
Brapa_ESTC040991	AT3G58940	| Symbols: | F-box family protein | chr3:21791979-21794190 REVERSE	1589.79	5682.81	3.57457	0.279754
Brapa_ESTC040052	AT1G26680	Symbols: | transcriptional factor B3 family protein | chr1:9219539-9223180 FORWARD	455.185	1625.52	3.57112	0.280024
Brapa_ESTC030991	no_hits_f	---------	1884.9	6728.92	3.56991	0.280119
Brapa_ESTC025570	AT1G15200	Symbols: | protein-protein interaction regulator family protein | chr1:5228472-5231012 REVERSE	2783.69	9936.12	3.56941	0.280159
Brapa_ESTC046219	no_hits_f	---------	2770.77	9888.33	3.5688	0.280206
Brapa_ESTC008385	AT1G67080	Symbols: | Involved in the photoprotection of PSII. aba4-1 mutant completely lacks neoxanthin,a component of the chromophore of the peripheral antenna system in PSII | chr1:25049068-25050344 REVERSE	961.662	3431.77	3.56858	0.280223
Brapa_ESTC047957	AT4G22890	Symbols: | similar to unknown protein [Arabidopsis thaliana] (TAIR:AT4G11960.1); similar to Os03g0857400 [Oryza sativa (japonica cultivar-group)] (GB:NP_001051955.1); similar to Os08g0526300 [Oryza sativa (japonica cultivar-group)] (GB:NP_001062297.1); similar to hypothetical protein OSJNBa0003M24.13 [Oryza sativa (japonica cultivar-group)] (GB:AAQ56398.1); contains domain no description (G3D.2.2…	469.259	1674.01	3.56735	0.28032
Brapa_ESTC000105	AT2G32720	Symbols: B5 #4 | B5 #4 (cytochrome b5 family protein #4); heme binding / transition metal ion binding | chr2:13884090-13885524 REVERSE	437.566	1559.89	3.56493	0.280511
Brapa_ESTC001238	AT5G13100	Symbols: | similar to Os01g0102500 [Oryza sativa (japonica cultivar-group)] (GB:NP_001041749.1); contains domain no description (G3D.3.40.109.10); contains domain NADH oxidase/flavin reductase (SSF55469) | chr5:4156792-4158238 FORWARD	732.475	2611	3.56463	0.280534
Brapa_ESTC006311	AT4G22890	Symbols: | similar to unknown protein [Arabidopsis thaliana] (TAIR:AT4G11960.1); similar to Os03g0857400 [Oryza sativa (japonica cultivar-group)] (GB:NP_001051955.1); similar to Os08g0526300 [Oryza sativa (japonica cultivar-group)] (GB:NP_001062297.1); similar to hypothetical protein OSJNBa0003M24.13 [Oryza sativa (japonica cultivar-group)] (GB:AAQ56398.1); contains domain no description (G3D.2.2…	1805.25	6427.75	3.56059	0.280853
Brapa_ESTC001494	AT5G55280	Symbols: ATFTSZ1-1, CPFTSZ, FTSZ1-1 | FTSZ1-1 (FtsZ1-1); structural molecule | chr5:22437966-22439753 REVERSE	2733.79	9727.52	3.55825	0.281037
Brapa_ESTC013593	AT1G74420	Symbols: ATFUT3, FUT3 | FUT3 (fucosyltransferase 3); fucosyltransferase | chr1:27971682-27973460 REVERSE	483.47	1720.07	3.55776	0.281076
Brapa_ESTC013758	AT3G16240	Symbols: TIP2;1, DELTA-TIP1, AQP1, ATTIP2;1, DELTA-TIP | DELTA-TIP (delta tonoplast integral protein); water channel | chr3:5505540-5506794 FORWARD	6421.95	22836.3	3.55598	0.281217
Brapa_ESTC011955	AT5G61410	Symbols: EMB2728, RPE | RPE (EMBRYO DEFECTIVE 2728); ribulose-phosphate 3-epimerase | chr5:24701311-24703062 REVERSE	1479.78	5260.33	3.55481	0.281309
Brapa_ESTC040852	AT1G80080	Symbols: TMM | TMM (TOO MANY MOUTHS); protein binding | chr1:30132966-30134456 REVERSE	632.563	2248.32	3.5543	0.281349
Brapa_ESTC033038	AT3G50470	Symbols: HR3 | HR3 (HOMOLOG OF RPW8 3) | chr3:18740127-18741143 FORWARD	502.521	1786.11	3.5543	0.281349
Brapa_ESTC051446	AT4G23800	Symbols: | high mobility group (HMG1/2) family protein | chr4:12390238-12392526 FORWARD	1023.14	3632.39	3.55024	0.281671
Brapa_ESTC029501	AT1G10120	Symbols: | DNA binding / transcription factor | chr1:3304230-3305986 REVERSE	638.75	2266.27	3.54798	0.281851
Brapa_ESTC018046	AT1G19710	Symbols: | glycosyl transferase family 1 protein | chr1:6814911-6816707 FORWARD	476.675	1691.23	3.54797	0.281851
Brapa_ESTC020792	AT2G43760	Symbols: | molybdopterin biosynthesis MoaE family protein | chr2:18140353-18140949 FORWARD	3200.67	11352.5	3.54691	0.281935
Brapa_ESTC047229	AT1G08980	Symbols: AMI1, ATAMI1 | ATAMI1 (AMIDASE-LIKE PROTEIN 1); amidase | chr1:2884458-2886433 FORWARD	5643.04	20006.6	3.54536	0.282059
Brapa_ESTC025790	AT3G25810	Symbols: | myrcene/ocimene synthase, putative | chr3:9432042-9435081 FORWARD	2286.66	8106.69	3.54521	0.282071
Brapa_ESTC021384	AT3G57030	Symbols: | strictosidine synthase family protein | chr3:21112632-21114183 REVERSE	1360.94	4823.01	3.54388	0.282176
Brapa_ESTC014697	AT5G35360	Symbols: CAC2 | CAC2 (acetyl co-enzyme A carboxylase biotin carboxylase subunit) | chr5:13601530-13605057 FORWARD	1494.27	5294.97	3.54352	0.282206
Brapa_ESTC026299	AT1G01940	Symbols: | peptidyl-prolyl cis-trans isomerase cyclophilin-type family protein | chr1:323082-324719 FORWARD	8263.76	29280.5	3.54324	0.282227
Brapa_ESTC016195	no_hits_f	---------	1002.73	3550.24	3.54057	0.28244
Brapa_ESTC039406	AT1G08980	Symbols: AMI1, ATAMI1 | ATAMI1 (AMIDASE-LIKE PROTEIN 1); amidase | chr1:2884458-2886433 FORWARD	5819.99	20597	3.53901	0.282565
Brapa_ESTC027461	AT3G62060	Symbols: | pectinacetylesterase family protein | chr3:22991098-22993709 FORWARD	974.217	3447.66	3.5389	0.282573
Brapa_ESTC016015	AT4G16442	Symbols: | integral membrane family protein | chr4:9272064-9272992 REVERSE	1997.25	7066.96	3.53835	0.282618
Brapa_ESTC016158	AT2G19870	Symbols: | tRNA/rRNA methyltransferase (SpoU) family protein | chr2:8583116-8584885 FORWARD	578.782	2047.85	3.53821	0.282629
Brapa_ESTC039210	AT1G05230	Symbols: | homeobox-leucine zipper family protein / lipid-binding START domain-containing protein | chr1:1513387-1517023 REVERSE	611.744	2163.78	3.53707	0.28272
Brapa_ESTC035691	AT4G15130	Symbols: | cholinephosphate cytidylyltransferase, putative / phosphorylcholine transferase, putative / CTP:phosphocholine cytidylyltransferase, putative | chr4:8637790-8639371 FORWARD	793.049	2804.57	3.53644	0.28277
Brapa_ESTC046853	AT5G52882	Symbols: | ATP binding / nucleoside-triphosphatase/ nucleotide binding | chr5:21451381-21455588 REVERSE	1777.35	6283.79	3.53548	0.282847
Brapa_ESTC008084	AT1G16560	| Symbols: | Per1-like family protein | chr1:5668938-5670336 FORWARD	344.825	1218.73	3.53434	0.282938
Brapa_ESTC020623	AT3G61770	Symbols: | similar to unknown protein [Arabidopsis thaliana] (TAIR:AT1G67600.1); similar to Os05g0534100 [Oryza sativa (japonica cultivar-group)] (GB:NP_001056147.1); similar to hypothetical protein DSY2350 [Desulfitobacterium hafniense Y51] (GB:YP_518583.1); contains InterPro domain Acid phosphatase/vanadium-dependent haloperoxidase; (InterPro:IPR008934); contains InterPro domain Acid phosphatas…	3503.65	12379.2	3.53323	0.283027
Brapa_ESTC018676	AT3G26280	Symbols: CYP71B4 | CYP71B4 (cytochrome P450, family 71, subfamily B, polypeptide 4); oxygen binding | chr3:9631595-9633207 REVERSE	771.473	2722.64	3.52914	0.283355
Brapa_ESTC010886	AT3G28460	Symbols: | similar to Conserved hypothetical protein 95 [Medicago truncatula] (GB:ABE78634.1); contains InterPro domain Conserved hypothetical protein 95; (InterPro:IPR004398) | chr3:10673910-10675534 REVERSE	2366.5	8350.23	3.52851	0.283405
Brapa_ESTC021776	AT2G36350	Symbols: | protein kinase, putative | chr2:15245982-15248943 FORWARD	1896.09	6688.36	3.52745	0.283491
Brapa_ESTC046253	AT5G55000	Symbols: FIP2 | FIP2 (FH protein interacting protein 2); voltage-gated potassium channel | chr5:22335870-22338825 FORWARD	448.7	1582.74	3.52739	0.283496
Brapa_ESTC046313	AT5G55710	Symbols: | similar to tic20 protein-related [Arabidopsis thaliana] (TAIR:AT2G47840.1); similar to Os02g0726600 [Oryza sativa (japonica cultivar-group)] (GB:NP_001047992.1); similar to hypothetical protein Tery_3886 [Trichodesmium erythraeum IMS101] (GB:YP_723396.1) | chr5:22572221-22572850 REVERSE	5855.5	20642.6	3.52534	0.283661
Brapa_ESTC006575	AT4G22890	Symbols: | similar to unknown protein [Arabidopsis thaliana] (TAIR:AT4G11960.1); similar to Os03g0857400 [Oryza sativa (japonica cultivar-group)] (GB:NP_001051955.1); similar to Os08g0526300 [Oryza sativa (japonica cultivar-group)] (GB:NP_001062297.1); similar to hypothetical protein OSJNBa0003M24.13 [Oryza sativa (japonica cultivar-group)] (GB:AAQ56398.1); contains domain no description (G3D.2.2…	3683.79	12983.3	3.52444	0.283733
Brapa_ESTC023704	AT5G39040	Symbols: ATTAP2 | ATTAP2 (Arabidopsis thaliana transporter associated with antigen processing protein 2); ATPase, coupled to transmembrane movement of substances | chr5:15642889-15646850 FORWARD	887.295	3126.99	3.52418	0.283754
Brapa_ESTC010470	AT1G74340	Symbols: | dolichol phosphate-mannose biosynthesis regulatory protein-related | chr1:27951949-27952315 REVERSE	1463.61	5156.85	3.52338	0.283819
Brapa_ESTC025962	AT1G10600	Symbols: | similar to mov34 family protein [Arabidopsis thaliana] (TAIR:AT1G48790.1); similar to Os01g0661500 [Oryza sativa (japonica cultivar-group)] (GB:NP_001043779.1); similar to ALM beta-like [Oryza sativa (japonica cultivar-group)] (GB:BAD72364.1); contains InterPro domain Mov34/MPN/PAD-1; (InterPro:IPR000555); contains InterPro domain Mov34-1; (InterPro:IPR003639) | chr1:3503766-3505191 FO…	417.679	1471.36	3.52271	0.283873
Brapa_ESTC013742	AT5G49450	Symbols: ATBZIP1 | bZIP family transcription factor | chr5:20069371-20069808 FORWARD	4208.16	14823.3	3.52251	0.283888
Brapa_ESTC004687	AT4G26555	Symbols: | immunophilin / FKBP-type peptidyl-prolyl cis-trans isomerase family protein | chr4:13404628-13406184 REVERSE	1530.47	5390.07	3.52184	0.283943
Brapa_ESTC023399	AT2G37540	Symbols: | short-chain dehydrogenase/reductase (SDR) family protein | chr2:15758773-15760898 REVERSE	1293.6	4549.59	3.517	0.284333
Brapa_ESTC041594	no_hits_f	---------	517.306	1818.35	3.51504	0.284492
Brapa_ESTC010142	AT1G21090	Symbols: | hydroxyproline-rich glycoprotein family protein | chr1:7384843-7386188 FORWARD	347.522	1221.05	3.51359	0.284609
Brapa_ESTC017572	AT1G15410	Symbols: | aspartate-glutamate racemase family | chr1:5299572-5300676 FORWARD	3091.8	10859.8	3.51245	0.284701
Brapa_ESTC041546	AT2G30420	Symbols: | myb family transcription factor | chr2:12968014-12968992 REVERSE	5656.52	19863.1	3.51154	0.284775
Brapa_ESTC034781	AT3G56480	Symbols: | myosin heavy chain-related | chr3:20947459-20949965 REVERSE	4469.36	15681.8	3.50874	0.285003
Brapa_ESTC000936	AT3G63095	Symbols: | Encodes a Protease inhibitor/seed storage/LTP family protein | chr3:23326481-23327233 FORWARD	296.731	1041.06	3.50843	0.285028
Brapa_ESTC050065	no_hits_f	---------	504.576	1770.03	3.50796	0.285066
Brapa_ESTC043984	AT3G61610	Symbols: | aldose 1-epimerase family protein | chr3:22810455-22812004 FORWARD	1279.17	4486.37	3.50725	0.285124
Brapa_ESTC033331	AT5G61980	Symbols: AGD1 | AGD1 (ARF-GAP DOMAIN 1); protein binding | chr5:24911698-24916404 FORWARD	920.535	3228.04	3.5067	0.285168
Brapa_ESTC008591	AT2G32410	Symbols: | auxin-resistance protein, putative | chr2:13764779-13767939 FORWARD	670.658	2351.74	3.50662	0.285175
Brapa_ESTC034086	no_hits_f	---------	349.826	1226.37	3.50566	0.285253
Brapa_ESTC002539	AT5G38520	Symbols: | hydrolase, alpha/beta fold family protein | chr5:15438835-15440464 FORWARD	680.322	2381.58	3.50067	0.28566
Brapa_ESTC047852	no_hits_f	---------	10963.3	38376.7	3.50047	0.285676
Brapa_ESTC007452	AT1G61520	Symbols: LHCA3 | LHCA3 (Photosystem I light harvesting complex gene 3) | chr1:22704158-22704814 FORWARD	2362.92	8269.84	3.49984	0.285727
Brapa_ESTC024157	AT3G20790	Symbols: | oxidoreductase family protein | chr3:7268808-7271105 FORWARD	1937.07	6778.01	3.4991	0.285787
Brapa_ESTC027811	AT5G23420	Symbols: HMGB6 | HMGB6 (High mobility group B 6); transcription factor | chr5:7888715-7890114 REVERSE	564.908	1976.58	3.49894	0.285801
Brapa_ESTC044363	AT4G23190	Symbols: AT-RLK3, CRK11 | CRK11 (CYSTEINE-RICH RLK11); kinase | chr4:12141208-12143721 REVERSE	410.904	1437.51	3.49841	0.285844
Brapa_ESTC029953	AT3G20230	Symbols: | 50S ribosomal protein L18 family | chr3:7055645-7056685 REVERSE	1332.86	4662.57	3.49817	0.285864
Brapa_ESTC025463	AT2G30670	Symbols: | tropinone reductase, putative / tropine dehydrogenase, putative | chr2:13076390-13077981 REVERSE	860.534	3009.32	3.49704	0.285956
Brapa_ESTC002493	AT1G49740	| Symbols: | phospholipase C | chr1:18411396-18413136 FORWARD	697.729	2439.42	3.49623	0.286022
Brapa_ESTC014258	AT5G61580	Symbols: | phosphofructokinase family protein | chr5:24778376-24781053 FORWARD	3744.97	13081.1	3.49298	0.286289
Brapa_ESTC033757	AT2G15860	Symbols: | similar to unknown protein [Oryza sativa (japonica cultivar-group)] (GB:AAP03423.1) | chr2:6912794-6916364 REVERSE	1305.14	4558.62	3.49282	0.286302
Brapa_ESTC009219	AT5G11170	Symbols: | DEAD/DEAH box helicase, putative (RH15) | chr5:3553335-3556647 FORWARD	1525.34	5326.81	3.49221	0.286351
Brapa_ESTC014588	AT3G59660	Symbols: | C2 domain-containing protein / GRAM domain-containing protein | chr3:22045403-22049461 REVERSE	335.665	1171.78	3.49092	0.286457
Brapa_ESTC008893	AT2G45790	Symbols: ATPMM | eukaryotic phosphomannomutase family protein | chr2:18862950-18864827 FORWARD	2405.92	8398.77	3.49088	0.286461
Brapa_ESTC003351	no_hits_f	---------	2678.46	9349.51	3.49063	0.286481
Brapa_ESTC011816	AT3G51960	Symbols: | bZIP family transcription factor | chr3:19293806-19295042 REVERSE	309.151	1079.03	3.4903	0.286508
Brapa_ESTC045549	AT5G13110	Symbols: G6PD2 | G6PD2 (GLUCOSE-6-PHOSPHATE DEHYDROGENASE 2); glucose-6-phosphate 1-dehydrogenase | chr5:4158955-4161643 FORWARD	1948.33	6799.25	3.48978	0.286551
Brapa_ESTC045465	AT5G32621	Symbols: | similar to unknown protein [Arabidopsis thaliana] (TAIR:AT3G15310.1); similar to hypothetical protein 24.t00017 [Brassica oleracea] (GB:ABD64939.1); contains InterPro domain Protein of unknown function DUF635; (InterPro:IPR006912); contains InterPro domain Bacterial adhesion; (InterPro:IPR008966) | chr5:12288590-12290958 FORWARD	420.645	1466.77	3.48695	0.286783
Brapa_ESTC013903	AT1G02470	Symbols: | similar to unknown protein [Arabidopsis thaliana] (TAIR:AT1G02475.1); similar to Streptomyces cyclase/dehydrase [Medicago truncatula] (GB:ABE82400.1); contains InterPro domain Streptomyces cyclase/dehydrase; (InterPro:IPR005031) | chr1:511916-513573 REVERSE	300.694	1047.86	3.48481	0.28696
Brapa_ESTC009882	AT5G20720	Symbols: CPN10, CHCPN10, ATCPN21, CPN21, CPN20 | CPN20 (CHAPERONIN 20); calmodulin binding | chr5:7015017-7016356 FORWARD	4539.25	15805.4	3.48194	0.287196
Brapa_ESTC002001	no_hits_f	---------	3234.73	11257.4	3.48017	0.287343
Brapa_ESTC020233	AT3G28940	Symbols: | avirulence-responsive protein, putative / avirulence induced gene (AIG) protein, putative | chr3:10969561-10970548 REVERSE	491.283	1708.4	3.47743	0.287569
Brapa_ESTC010806	AT5G22440	Symbols: | 60S ribosomal protein L10A (RPL10aC) | chr5:7435331-7436489 REVERSE	1033.5	3591.74	3.47532	0.287744
Brapa_ESTC020931	AT3G23210	Symbols: | basic helix-loop-helix (bHLH) family protein | chr3:8283262-8284922 REVERSE	2225.56	7733.64	3.47492	0.287777
Brapa_ESTC015098	AT1G70410	Symbols: | carbonic anhydrase, putative / carbonate dehydratase, putative | chr1:26537830-26541120 REVERSE	1177.43	4088.68	3.47255	0.287973
Brapa_ESTC019523	AT1G61795	Symbols: | similar to RIC10 (ROP-INTERACTIVE CRIB MOTIF-CONTAINING PROTEIN 10) [Arabidopsis thaliana] (TAIR:AT4G04900.1); similar to 69873 (GB:AAD21424.1); contains InterPro domain PAK-box/P21-Rho-binding; (InterPro:IPR000095); contains InterPro domain Wiscott-Aldrich syndrome, C-terminal; (InterPro:IPR011026) | chr1:22823608-22824491 FORWARD	735.518	2552.59	3.47047	0.288146
Brapa_ESTC033736	no_hits_f	---------	1281.5	4446.21	3.46954	0.288223
Brapa_ESTC026078	AT3G02450	Symbols: | cell division protein ftsH, putative | chr3:502883-505037 REVERSE	2209	7659.81	3.46755	0.288388
Brapa_ESTC003530	no_hits_f	---------	1112.48	3856.75	3.4668	0.28845
Brapa_ESTC047741	AT1G70100	Symbols: | similar to unknown protein [Arabidopsis thaliana] (TAIR:AT1G24160.1); similar to Targeting for Xklp2 [Medicago truncatula] (GB:ABE84619.1) | chr1:26407399-26409433 FORWARD	2570.14	8909.72	3.46663	0.288465
Brapa_ESTC045764	AT5G17230	Symbols: PSY | PSY (PHYTOENE SYNTHASE) | chr5:5659841-5662089 REVERSE	2591.42	8978.84	3.46483	0.288614
Brapa_ESTC027818	AT4G10430	Symbols: | similar to unknown protein [Arabidopsis thaliana] (TAIR:AT1G33230.1); similar to Os02g0106800 [Oryza sativa (japonica cultivar-group)] (GB:NP_001045630.1); similar to Os08g0152800 [Oryza sativa (japonica cultivar-group)] (GB:NP_001061007.1); similar to Predicted membrane protein (ISS) [Ostreococcus tauri] (GB:CAL54240.1); contains InterPro domain TMPIT-like; (InterPro:IPR012926) | chr4…	706.661	2448.46	3.46483	0.288614
Brapa_ESTC039935	AT1G21650	Symbols: | preprotein translocase secA family protein | chr1:7593502-7604141 REVERSE	3326.44	11524.8	3.4646	0.288633
Brapa_ESTC026329	AT2G25830	| Symbols: | YebC-related | chr2:11026169-11028743 REVERSE	525.601	1820.4	3.46346	0.288728
Brapa_ESTC051614	no_hits_f	---------	490.511	1697.69	3.46106	0.288928
Brapa_ESTC038851	AT3G62910	Symbols: APG3 | APG3 (ALBINO AND PALE GREEN); translation release factor | chr3:23268636-23271361 REVERSE	769.458	2662.92	3.46077	0.288953
Brapa_ESTC017670	AT2G16365	| Symbols: | F-box family protein | chr2:7082022-7083471 FORWARD	2664.53	9216.21	3.45885	0.289113
Brapa_ESTC023049	AT1G15220	| Symbols: ATCCMH | ATCCMH | chr1:5240466-5241112 REVERSE	432.781	1496.71	3.45835	0.289155
Brapa_ESTC022689	AT2G31570	Symbols: ATGPX2 | ATGPX2 (GLUTATHIONE PEROXIDASE 2); glutathione peroxidase | chr2:13445288-13446852 REVERSE	6075.12	21007.5	3.45796	0.289188
Brapa_ESTC004030	AT3G59540	Symbols: | 60S ribosomal protein L38 (RPL38B) | chr3:22006874-22007719 REVERSE	7418.28	25642.4	3.45665	0.289297
Brapa_ESTC009797	AT2G23390	Symbols: | similar to Os04g0442200 [Oryza sativa (japonica cultivar-group)] (GB:NP_001052881.1); similar to P0076O17.10 [Oryza sativa (japonica cultivar-group)] (GB:CAE02512.1); contains InterPro domain Protein of unknown function DUF482; (InterPro:IPR007434) | chr2:9967648-9970556 REVERSE	1394.01	4816.68	3.45527	0.289413
Brapa_ESTC034515	no_hits_f	---------	1689.04	5833.46	3.45371	0.289543
Brapa_ESTC017671	AT5G05610	Symbols: | PHD finger family protein | chr5:1677332-1678943 REVERSE	2963.68	10234.8	3.45341	0.289569
Brapa_ESTC005661	AT5G66530	Symbols: | aldose 1-epimerase family protein | chr5:26571047-26572801 REVERSE	2005.65	6926.29	3.45339	0.289571
Brapa_ESTC012734	AT4G01100	Symbols: | mitochondrial substrate carrier family protein | chr4:477411-479590 FORWARD	813.658	2807.49	3.45045	0.289817
Brapa_ESTC038168	AT5G48410	Symbols: GLR1.3, ATGLR1.3 | ATGLR1.3 (Arabidopsis thaliana glutamate receptor 1.3) | chr5:19637542-19640503 FORWARD	1243.34	4288.35	3.44906	0.289934
Brapa_ESTC002701	AT5G57560	Symbols: XTH22, TCH4 | TCH4 (TOUCH 4); hydrolase, acting on glycosyl bonds | chr5:23324522-23325461 REVERSE	3156.57	10884.2	3.44811	0.290014
Brapa_ESTC010925	AT3G20790	Symbols: | oxidoreductase family protein | chr3:7268808-7271105 FORWARD	1347.85	4646.71	3.4475	0.290065
Brapa_ESTC001908	AT5G47570	Symbols: | similar to hypothetical protein 25.t00006 [Brassica oleracea] (GB:ABD64969.1); similar to hypothetical protein 26.t00015 [Brassica oleracea] (GB:ABD64995.1) | chr5:19310095-19311892 REVERSE	1415.69	4877.97	3.44565	0.290221
Brapa_ESTC050740	no_hits_f	---------	877.491	3019.77	3.44137	0.290582
Brapa_ESTC029413	AT3G16240	Symbols: TIP2;1, DELTA-TIP1, AQP1, ATTIP2;1, DELTA-TIP | DELTA-TIP (delta tonoplast integral protein); water channel | chr3:5505540-5506794 FORWARD	6946.05	23900.2	3.44083	0.290627
Brapa_ESTC034297	AT5G20220	Symbols: | zinc knuckle (CCHC-type) family protein | chr5:6822210-6825773 FORWARD	899.331	3094.07	3.44041	0.290663
Brapa_ESTC039962	no_hits_f	---------	901.813	3099.65	3.43713	0.29094
Brapa_ESTC041075	AT2G20562	Symbols: | similar to unknown protein [Arabidopsis thaliana] (TAIR:AT2G31090.1); similar to unnamed protein product [Medicago truncatula] (GB:ABE89015.1) | chr2:8857448-8857916 REVERSE	2338.16	8034.1	3.43608	0.291029
Brapa_ESTC009127	AT3G05520	Symbols: | F-actin capping protein alpha subunit family protein | chr3:1598617-1601140 FORWARD	4481.81	15398.8	3.43584	0.291049
Brapa_ESTC028138	no_hits_f	---------	2234.7	7673.58	3.43383	0.29122
Brapa_ESTC037206	AT3G61610	Symbols: | aldose 1-epimerase family protein | chr3:22810455-22812004 FORWARD	1326.49	4554.81	3.43373	0.291228
Brapa_ESTC047649	AT4G25080	Symbols: CHLM | CHLM (MAGNESIUM-PROTOPORPHYRIN IX METHYLTRANSFERASE) | chr4:12877025-12878138 FORWARD	1458.31	5007.2	3.43356	0.291243
Brapa_ESTC017782	AT3G04940	Symbols: ATCYSD1 | ATCYSD1 (Arabidopsis thaliana cysteine synthase D1); cysteine synthase | chr3:1365687-1367514 FORWARD	586.481	2012.96	3.43227	0.291353
Brapa_ESTC037345	AT4G11850	Symbols: MEE54 | PLDGAMMA1 (maternal effect embryo arrest 54); phospholipase D | chr4:7129346-7132931 REVERSE	352.704	1210.3	3.43149	0.291419
Brapa_ESTC005842	AT2G46580	Symbols: | pyridoxine 5'-phosphate oxidase-related | chr2:19136481-19137585 REVERSE	668.399	2292.26	3.42948	0.29159
Brapa_ESTC014665	AT3G26710	Symbols: | similar to Os11g0526200 [Oryza sativa (japonica cultivar-group)] (GB:NP_001067997.1); similar to unnamed protein product [Ostreococcus tauri] (GB:CAL53542.1) | chr3:9814787-9815843 FORWARD	5398.27	18506.1	3.42815	0.291702
Brapa_ESTC013059	AT5G44190	Symbols: ATGLK2, GPRI2, GLK2 | GLK2 (GOLDEN2-LIKE 2); DNA binding / transcription factor | chr5:17815662-17817874 FORWARD	2180.4	7473.5	3.42758	0.291751
Brapa_ESTC000779	AT1G49480	Symbols: RTV1 | RTV1 (RELATED TO VERNALIZATION1 1); DNA binding / transcription factor | chr1:18318264-18319128 REVERSE	813.785	2788.93	3.42711	0.291791
Brapa_ESTC003982	no_hits_f	---------	807.316	2766.05	3.42623	0.291866
Brapa_ESTC035371	AT3G47090	Symbols: | leucine-rich repeat transmembrane protein kinase, putative | chr3:17352497-17355630 REVERSE	651.292	2230.98	3.42547	0.291931
Brapa_ESTC013949	AT2G21940	Symbols: | ATP binding / shikimate kinase | chr2:9358186-9359961 FORWARD	781.454	2673.7	3.42144	0.292274
Brapa_ESTC033187	AT5G61060	Symbols: HDA5, HDA05 | HDA05 (HISTONE DEACETYLASE5); histone deacetylase | chr5:24584363-24588143 REVERSE	3889.46	13306.5	3.42117	0.292298
Brapa_ESTC037185	AT5G41960	Symbols: | similar to Os04g0585600 [Oryza sativa (japonica cultivar-group)] (GB:NP_001053679.1); similar to H0307D04.4 [Oryza sativa (indica cultivar-group)] (GB:CAH66859.1) | chr5:16806988-16808096 FORWARD	1334.36	4564.17	3.42049	0.292355
Brapa_ESTC016037	AT2G15860	Symbols: | similar to unknown protein [Oryza sativa (japonica cultivar-group)] (GB:AAP03423.1) | chr2:6912794-6916364 REVERSE	1947.1	6656.67	3.41876	0.292504
Brapa_ESTC011460	AT5G67370	Symbols: | similar to unknown protein [Arabidopsis thaliana] (TAIR:AT5G11840.1); similar to Protein of unknown function DUF1230 [Medicago truncatula] (GB:ABE85761.1); contains InterPro domain Protein of unknown function DUF1230; (InterPro:IPR009631) | chr5:26894893-26896691 REVERSE	5166.75	17663.8	3.41874	0.292505
Brapa_ESTC000804	AT5G55000	Symbols: FIP2 | FIP2 (FH protein interacting protein 2); voltage-gated potassium channel | chr5:22335870-22338825 FORWARD	945.491	3231.73	3.41804	0.292565
Brapa_ESTC005545	AT1G54570	Symbols: | esterase/lipase/thioesterase family protein | chr1:20384316-20388620 REVERSE	1913.31	6538.6	3.41743	0.292618
Brapa_ESTC012317	AT3G11090	Symbols: LBD21 | LOB domain family protein / lateral organ boundaries domain family protein (LBD21) | chr3:3475042-3475539 FORWARD	858.292	2932.11	3.41621	0.292722
Brapa_ESTC025499	AT5G53340	Symbols: | transferase, transferring hexosyl groups | chr5:21658271-21660421 REVERSE	1264.74	4319.35	3.41521	0.292808
Brapa_ESTC014264	AT2G46225	Symbols: ABI1L1 | ABI1L1 (ABI-1-LIKE 1) | chr2:18989186-18991147 FORWARD	1192.41	4071.43	3.41445	0.292873
Brapa_ESTC014044	AT4G33420	| Symbols: | peroxidase, putative | chr4:16084859-16086108 FORWARD	5448.76	18604.1	3.41437	0.29288
Brapa_ESTC005770	AT3G27340	Symbols: | similar to COG3536: Uncharacterized protein conserved in bacteria [Magnetospirillum magnetotacticum MS-1] (GB:ZP_00055772.1); similar to Os02g0197800 [Oryza sativa (japonica cultivar-group)] (GB:NP_001046202.1); similar to hypothetical protein amb0010 [Magnetospirillum magneticum AMB-1] (GB:YP_419373.1); contains InterPro domain Protein of unknown function DUF971; (InterPro:IPR010376) …	358.046	1221.92	3.41275	0.293019
Brapa_ESTC044396	AT3G26460	Symbols: | major latex protein-related / MLP-related | chr3:9685290-9685844 REVERSE	349.97	1194.28	3.41252	0.293038
Brapa_ESTC011382	AT2G01910	Symbols: ATMAP65-6 | ATMAP65-6; microtubule binding | chr2:417190-420181 FORWARD	1671.1	5699.84	3.41083	0.293184
Brapa_ESTC030734	no_hits_f	---------	1084.05	3697.17	3.41052	0.293211
Brapa_ESTC021736	AT1G14190	Symbols: | glucose-methanol-choline (GMC) oxidoreductase family protein | chr1:4852797-4854302 FORWARD	664.618	2265.9	3.40933	0.293313
Brapa_ESTC046781	AT1G12350	Symbols: ATCOAB | ATCOAB (4-PHOSPHO-PANTO-THENOYLCYSTEINE SYNTHETASE); catalytic/ phosphopantothenate--cysteine ligase | chr1:4198868-4200631 FORWARD	1075.63	3666.38	3.40859	0.293377
Brapa_ESTC001363	AT1G20090	Symbols: ARAC4, ROP2, ATROP2, ATRAC4 | ARAC4/ATRAC4/ATROP2/ROP2 (rho-related protein from plants 2); GTP binding | chr1:6967214-6968594 FORWARD	1298.82	4426.42	3.40803	0.293424
Brapa_ESTC044752	AT4G31360	| Symbols: | selenium binding | chr4:15221951-15223316 FORWARD	1822.77	6211.92	3.40796	0.293431
Brapa_ESTC030725	AT2G42960	Symbols: | protein kinase family protein | chr2:17875674-17877707 REVERSE	2728.2	9297.37	3.40788	0.293438
Brapa_ESTC006933	AT5G46110	Symbols: TPT, APE2 | APE2 (ACCLIMATION OF PHOTOSYNTHESIS TO ENVIRONMENT); antiporter/ triose-phosphate transporter | chr5:18714833-18717439 FORWARD	2513.42	8563.79	3.40723	0.293494
Brapa_ESTC049587	AT1G27150	| Symbols: | binding | chr1:9429164-9432055 FORWARD	299.981	1022.05	3.40705	0.293509
Brapa_ESTC043617	AT5G11020	| Symbols: | kinase | chr5:3486440-3488984 REVERSE	781.761	2663.09	3.40653	0.293554
Brapa_ESTC014957	AT2G31110	Symbols: | similar to unknown protein [Arabidopsis thaliana] (TAIR:AT2G42570.1); similar to unknown [Pisum sativum] (GB:ABA29158.1); contains InterPro domain Protein of unknown function DUF231, plant; (InterPro:IPR004253) | chr2:13265599-13269148 REVERSE	3746.16	12760	3.40615	0.293586
Brapa_ESTC021203	AT2G16860	Symbols: | GCIP-interacting family protein | chr2:7311221-7313041 REVERSE	3748.94	12765.8	3.40518	0.293671
Brapa_ESTC022873	AT1G25375	Symbols: | metallo-beta-lactamase family protein | chr1:8900266-8903207 REVERSE	676.667	2303.46	3.40413	0.293761
Brapa_ESTC042046	AT2G38430	Symbols: | similar to unknown protein [Arabidopsis thaliana] (TAIR:AT3G54310.1); similar to Os02g0504100 [Oryza sativa (japonica cultivar-group)] (GB:NP_001046910.1) | chr2:16100028-16101888 REVERSE	687.861	2340.45	3.4025	0.293901
Brapa_ESTC004801	AT3G44020	Symbols: | thylakoid lumenal P17.1 protein | chr3:15812369-15813548 FORWARD	2534.82	8623.5	3.40202	0.293943
Brapa_ESTC008528	AT3G22790	Symbols: | kinase interacting family protein | chr3:8052453-8057895 REVERSE	932.993	3172.73	3.40059	0.294066
Brapa_ESTC029771	AT4G03100	Symbols: | rac GTPase activating protein, putative | chr4:1374361-1375913 FORWARD	666.151	2263.45	3.3978	0.294308
Brapa_ESTC022111	AT1G18260	Symbols: | suppressor of lin-12-like protein-related / sel-1 protein-related | chr1:6279040-6282001 REVERSE	1013.54	3443.45	3.39745	0.294339
Brapa_ESTC044315	no_hits_f	---------	1118.95	3801.57	3.39744	0.294339
Brapa_ESTC027198	AT1G16790	Symbols: | ribosomal protein-related | chr1:5744631-5745065 FORWARD	1767	6002.49	3.39699	0.294378
Brapa_ESTC025613	AT3G14660	Symbols: CYP72A13 | CYP72A13 (cytochrome P450, family 72, subfamily A, polypeptide 13); oxygen binding | chr3:4924967-4926918 FORWARD	1580.33	5367.97	3.39674	0.2944
Brapa_ESTC050499	AT5G64040	Symbols: PSAN | PSAN (photosystem I reaction center subunit PSI-N); calmodulin binding | chr5:25646090-25646635 REVERSE	4287.94	14557.6	3.39501	0.29455
Brapa_ESTC017314	AT2G47710	Symbols: | universal stress protein (USP) family protein | chr2:19562115-19563026 REVERSE	366.9	1245.48	3.3946	0.294585
Brapa_ESTC000209	AT2G24765	Symbols: ARF3, ARL1, ATARL1 | ARF3/ARL1/ATARL1 (ADP-RIBOSYLATION FACTOR 3); protein binding | chr2:10569901-10572040 FORWARD	3536.94	11997.6	3.39208	0.294804
Brapa_ESTC018463	AT2G20725	Symbols: | CAAX amino terminal protease family protein | chr2:8941194-8942507 REVERSE	478.803	1623.52	3.39079	0.294917
Brapa_ESTC032646	AT3G17040	Symbols: HCF107 | HCF107 (HIGH CHLOROPHYLL FLUORESCENT 107); binding | chr3:5809384-5812611 REVERSE	3071.6	10413.8	3.39035	0.294955
Brapa_ESTC049060	no_hits_f	---------	555.533	1882.06	3.38785	0.295173
Brapa_ESTC037364	AT4G12020	Symbols: ATWRKY19, WRKY19, MAPKKK11 | WRKY19 (WRKY DNA-binding protein 19); transcription factor | chr4:7201650-7208590 FORWARD	411.555	1394.27	3.38781	0.295176
Brapa_ESTC026926	AT4G11790	Symbols: | Ran-binding protein 1 domain-containing protein / RanBP1 domain-containing protein | chr4:7090450-7093202 FORWARD	756.64	2562.75	3.38701	0.295245
Brapa_ESTC017773	AT5G35630	Symbols: GLN2, ATGSL1, GS2 | GS2 (GLUTAMINE SYNTHETASE 2) | chr5:13848450-13850469 FORWARD	3238.64	10968.6	3.38679	0.295265
Brapa_ESTC017504	AT5G35620	Symbols: EIF(ISO)4E, LSP, LSP1 | LSP1 (LOSS OF SUSCEPTIBILITY TO POTYVIRUSES); RNA binding / translation initiation factor | chr5:13842176-13843561 REVERSE	2900.27	9820.84	3.38618	0.295318
Brapa_ESTC017847	AT4G35000	Symbols: APX3 | APX3 (ASCORBATE PEROXIDASE 3); L-ascorbate peroxidase | chr4:16665012-16667546 REVERSE	5561.28	18827.2	3.38541	0.295385
Brapa_ESTC010968	no_hits_f	---------	2231.7	7554.05	3.38489	0.295431
Brapa_ESTC028884	AT5G66190	Symbols: ATLFNR1 | ATLFNR1 (LEAF FNR 1); NADPH dehydrogenase/ oxidoreductase | chr5:26468429-26470238 REVERSE	13409.8	45383.2	3.38433	0.295479
Brapa_ESTC043202	no_hits_f	---------	316.878	1072.19	3.38361	0.295543
Brapa_ESTC001578	AT1G27435	Symbols: | similar to Os12g0477600 [Oryza sativa (japonica cultivar-group)] (GB:NP_001066758.1) | chr1:9527943-9528801 REVERSE	2792.8	9448.14	3.38303	0.295593
Brapa_ESTC026079	AT5G53340	Symbols: | galactosyltransferase family protein | chr5:21658271-21660421 REVERSE	360.631	1219.37	3.38121	0.295752
Brapa_ESTC006498	AT3G59540	Symbols: | 60S ribosomal protein L38 (RPL38B) | chr3:22006874-22007719 REVERSE	3372.85	11401.1	3.38026	0.295835
Brapa_ESTC037414	AT1G67490	Symbols: KNOPF, KNF, GCS1 | GCS1 (GLUCOSIDASE 1); alpha-glucosidase | chr1:25284296-25290244 REVERSE	1281.5	4331.26	3.37984	0.295872
Brapa_ESTC044906	AT4G33000	Symbols: ATCBL10, CBL10 | CBL10 (calcineurin B-like protein 10); calcium ion binding | chr4:15924824-15926401 FORWARD	2631.07	8891.32	3.37936	0.295914
Brapa_ESTC033188	AT5G61060	Symbols: HDA5, HDA05 | HDA05 (HISTONE DEACETYLASE5); histone deacetylase | chr5:24584363-24588143 REVERSE	2659.84	8985.62	3.37826	0.296011
Brapa_ESTC018220	AT3G54880	Symbols: | similar to unknown protein [Arabidopsis thaliana] (TAIR:AT5G25360.1); similar to hypothetical protein [Picea mariana] (GB:AAC32109.1); similar to Os07g0479600 [Oryza sativa (japonica cultivar-group)] (GB:NP_001059637.1) | chr3:20348056-20348764 REVERSE	2003.35	6766.87	3.37778	0.296053
Brapa_ESTC018609	AT3G21670	Symbols: | nitrate transporter (NTP3) | chr3:7626949-7628961 REVERSE	2907.6	9816.95	3.37631	0.296182
Brapa_ESTC012389	AT5G17660	| Symbols: | methyltransferase | chr5:5818780-5820813 REVERSE	419.113	1414.78	3.37565	0.296239
Brapa_ESTC011321	AT1G49010	Symbols: | myb family transcription factor | chr1:18136382-18137446 FORWARD	930.546	3141.17	3.37562	0.296242
Brapa_ESTC017151	AT1G16570	Symbols: | glycosyl transferase family 1 protein | chr1:5670756-5673416 REVERSE	4407.39	14859.2	3.37143	0.29661
Brapa_ESTC028348	AT5G38360	| Symbols: | catalytic | chr5:15349519-15350786 REVERSE	2373.33	7999.33	3.37051	0.296691
Brapa_ESTC004553	AT3G44020	Symbols: | thylakoid lumenal P17.1 protein | chr3:15812369-15813548 FORWARD	2884.8	9715.33	3.36777	0.296933
Brapa_ESTC037539	AT5G27620	Symbols: CYCH;1 | CYCH;1 (CYCLIN H;1); cyclin-dependent protein kinase/ protein binding / protein kinase | chr5:9771765-9774687 FORWARD	1813.33	6106.06	3.36732	0.296972
Brapa_ESTC009425	AT2G40810	Symbols: AtATG18c | AtATG18c (Arabidopsis thaliana homolog of yeast autophagy 18 (ATG18) c) | chr2:17039764-17041416 FORWARD	1764.39	5940.65	3.36697	0.297003
Brapa_ESTC001080	AT3G12780	Symbols: PGK1 | PGK1 (PHOSPHOGLYCERATE KINASE 1); phosphoglycerate kinase | chr3:4061134-4063147 REVERSE	1000.96	3369.47	3.36624	0.297067
Brapa_ESTC036062	AT1G32430	| Symbols: | F-box family protein | chr1:11704912-11706305 REVERSE	863.398	2906.08	3.36586	0.297101
Brapa_ESTC015582	AT3G20430	Symbols: | similar to Os01g0559200 [Oryza sativa (japonica cultivar-group)] (GB:NP_001043341.1); similar to Mediator of U snRNA nuclear export PHAX (ISS) [Ostreococcus tauri] (GB:CAL53287.1); contains domain FAMILY NOT NAMED (PTHR13135) | chr3:7121486-7123080 FORWARD	1563.6	5262.54	3.36566	0.297119
Brapa_ESTC011866	AT4G25340	Symbols: | immunophilin-related / FKBP-type peptidyl-prolyl cis-trans isomerase-related | chr4:12959667-12962642 REVERSE	4388.69	14770.5	3.36558	0.297125
Brapa_ESTC031716	no_hits_f	---------	2188.81	7364.86	3.36478	0.297196
Brapa_ESTC004100	no_hits_f	---------	4040.36	13589.1	3.36334	0.297324
Brapa_ESTC026964	AT3G45850	Symbols: | kinesin motor protein-related | chr3:16866799-16871935 REVERSE	1595.29	5365.3	3.36321	0.297335
Brapa_ESTC003403	AT5G17760	Symbols: | AAA-type ATPase family protein | chr5:5860593-5862303 REVERSE	1870.01	6287.82	3.36245	0.297402
Brapa_ESTC028654	no_hits_f	---------	4617.19	15524.5	3.36233	0.297413
Brapa_ESTC039952	AT1G22750	Symbols: | similar to unknown protein [Oryza sativa (japonica cultivar-group)] (GB:BAD68608.1); contains InterPro domain Protein of unknown function DUF1475; (InterPro:IPR009943) | chr1:8050900-8052703 FORWARD	7574.77	25466.3	3.36199	0.297443
Brapa_ESTC006821	AT5G65840	Symbols: | similar to unknown protein [Arabidopsis thaliana] (TAIR:AT2G37240.1); similar to Os03g0729300 [Oryza sativa (japonica cultivar-group)] (GB:NP_001051154.1); similar to expressed protein [Oryza sativa (japonica cultivar-group)] (GB:ABF98680.1); similar to Os03g0729200 [Oryza sativa (japonica cultivar-group)] (GB:NP_001051153.1); contains InterPro domain Thioredoxin-like fold; (InterPro:I…	4573.85	15374.9	3.36148	0.297488
Brapa_ESTC030343	AT3G20600	Symbols: NDR1 | NDR1 (NON RACE-SPECIFIC DISEASE RESISTANCE 1); signal transducer | chr3:7194883-7195542 FORWARD	1203.66	4046	3.36141	0.297494
Brapa_ESTC043168	AT3G21560	Symbols: UGT84A2 | UGT84A2; UDP-glycosyltransferase/ sinapate 1-glucosyltransferase | chr3:7595890-7597380 FORWARD	3288.52	11052.8	3.36103	0.297528
Brapa_ESTC037114	AT3G28460	Symbols: | similar to Conserved hypothetical protein 95 [Medicago truncatula] (GB:ABE78634.1); contains InterPro domain Conserved hypothetical protein 95; (InterPro:IPR004398) | chr3:10673910-10675534 REVERSE	1608.57	5405.9	3.36069	0.297558
Brapa_ESTC027591	AT1G10350	Symbols: | DNAJ heat shock protein, putative | chr1:3393597-3394862 REVERSE	3256.55	10943	3.3603	0.297592
Brapa_ESTC010917	AT3G19900	Symbols: | similar to hypothetical protein [Oryza sativa (japonica cultivar-group)] (GB:BAD22944.1) | chr3:6922858-6924563 REVERSE	1218.36	4093.38	3.35975	0.297642
Brapa_ESTC013909	AT5G54270	Symbols: LHCB3*1, LHCB3 | LHCB3 (LIGHT-HARVESTING CHLOROPHYLL BINDING PROTEIN 3) | chr5:22055650-22056609 FORWARD	6607.81	22178.1	3.35635	0.297943
Brapa_ESTC000588	AT3G26710	Symbols: | similar to Os11g0526200 [Oryza sativa (japonica cultivar-group)] (GB:NP_001067997.1); similar to unnamed protein product [Ostreococcus tauri] (GB:CAL53542.1) | chr3:9814787-9815843 FORWARD	5470.92	18362	3.35629	0.297948
Brapa_ESTC041410	AT2G31580	Symbols: | similar to unknown protein [Arabidopsis thaliana] (TAIR:AT2G32330.1); similar to Os05g0535500 [Oryza sativa (japonica cultivar-group)] (GB:NP_001056156.1); similar to interphase cytoplasmic foci protein 45 [Gallus gallus] (GB:NP_001025787.1); contains InterPro domain tRNAHis guanylyltransferase; (InterPro:IPR007537) | chr2:13448214-13452914 REVERSE	1153.56	3867.65	3.35279	0.298259
Brapa_ESTC009544	AT1G03680	Symbols: ATM1, TRX-M1, ATHM1 | ATHM1 (Arabidopsis thioredoxin M-type 1); thiol-disulfide exchange intermediate | chr1:916989-917864 REVERSE	1408.14	4719.5	3.35158	0.298366
Brapa_ESTC042086	AT2G45790	Symbols: ATPMM | eukaryotic phosphomannomutase family protein | chr2:18862950-18864827 FORWARD	3918.57	13119.9	3.34813	0.298674
Brapa_ESTC006755	AT5G51820	Symbols: ATPGMP, PGM1, STF1, PGM | PGM (PHOSPHOGLUCOMUTASE) | chr5:21080757-21085159 REVERSE	780.803	2613.85	3.34764	0.298718
Brapa_ESTC032114	AT5G09660	Symbols: PMDH2 | PMDH2 (PEROXISOMAL NAD-MALATE DEHYDROGENASE 2); malate dehydrogenase | chr5:2993646-2995552 REVERSE	8897.08	29756.4	3.34451	0.298997
Brapa_ESTC011234	AT4G18810	Symbols: | transcriptional repressor | chr4:10322633-10325746 REVERSE	956.606	3198.34	3.34342	0.299095
Brapa_ESTC022734	AT4G22100	Symbols: | glycosyl hydrolase family 1 protein | chr4:11707382-11709944 REVERSE	2171.62	7259.54	3.34291	0.29914
Brapa_ESTC007374	AT3G57190	Symbols: | peptide chain release factor, putative | chr3:21177447-21179177 FORWARD	2577.99	8608.32	3.33916	0.299477
Brapa_ESTC002863	AT5G39040	Symbols: ATTAP2 | ATTAP2 (Arabidopsis thaliana transporter associated with antigen processing protein 2); ATPase, coupled to transmembrane movement of substances | chr5:15642889-15646850 FORWARD	1678.29	5602.27	3.33808	0.299573
Brapa_ESTC048792	no_hits_f	---------	3373.25	11255.2	3.3366	0.299706
Brapa_ESTC013033	AT5G65010	Symbols: ASN2 | ASN2 (ASPARAGINE SYNTHETASE 2); asparagine synthase (glutamine-hydrolyzing) | chr5:25986450-25989504 FORWARD	753.55	2514.25	3.33654	0.299712
Brapa_ESTC025721	AT1G08450	Symbols: CRT3 | CRT3 (CALRETICULIN 3); calcium ion binding | chr1:2668005-2671797 REVERSE	3871.25	12909.9	3.33481	0.299867
Brapa_ESTC026658	AT4G36810	Symbols: GGPS1 | GGPS1 (GERANYLGERANYL PYROPHOSPHATE SYNTHASE 1); farnesyltranstransferase | chr4:17343517-17344632 FORWARD	1606.34	5353.54	3.33276	0.300052
Brapa_ESTC002196	AT3G06390	Symbols: | integral membrane family protein | chr3:1938919-1939713 REVERSE	905.523	3017.04	3.33182	0.300136
Brapa_ESTC008435	AT5G64170	Symbols: | dentin sialophosphoprotein-related | chr5:25690130-25693160 REVERSE	630.649	2100.64	3.33092	0.300218
Brapa_ESTC002643	AT3G60340	Symbols: | palmitoyl protein thioesterase family protein | chr3:22315370-22317364 FORWARD	1291.66	4301.91	3.33053	0.300253
Brapa_ESTC011512	AT5G65940	Symbols: CHY1 | CHY1 (BETA-HYDROXYISOBUTYRYL-COA HYDROLASE 1) | chr5:26394153-26396387 REVERSE	1799.29	5990.69	3.32947	0.300348
Brapa_ESTC021232	AT5G53340	Symbols: | transferase, transferring hexosyl groups | chr5:21658271-21660421 REVERSE	384.291	1279.38	3.3292	0.300373
Brapa_ESTC017608	AT5G17230	Symbols: PSY | PSY (PHYTOENE SYNTHASE) | chr5:5659841-5662089 REVERSE	2920.73	9718.54	3.32744	0.300532
Brapa_ESTC040594	AT1G77250	Symbols: | PHD finger family protein | chr1:29025338-29027832 REVERSE	872.611	2903.49	3.32736	0.300539
Brapa_ESTC001161	AT1G80130	| Symbols: | binding | chr1:30146142-30147370 REVERSE	1818.21	6048.33	3.32653	0.300614
Brapa_ESTC027227	AT1G26680	Symbols: | transcriptional factor B3 family protein | chr1:9219539-9223180 FORWARD	379.787	1263.14	3.32592	0.300669
Brapa_ESTC005723	AT1G72050	Symbols: | zinc finger (C2H2 type) family protein | chr1:27119470-27120890 FORWARD	630.647	2097.06	3.32525	0.300729
Brapa_ESTC003821	AT4G15260	Symbols: | UDP-glucoronosyl/UDP-glucosyl transferase family protein | chr4:8714065-8715144 FORWARD	1224.51	4070.31	3.32403	0.300839
Brapa_ESTC016117	AT1G16570	Symbols: | glycosyl transferase family 1 protein | chr1:5670756-5673416 REVERSE	3122.42	10374.2	3.32249	0.300979
Brapa_ESTC033737	no_hits_f	---------	2796.26	9289.84	3.32224	0.301002
Brapa_ESTC049808	AT1G09450	| Symbols: | haspin-related | chr1:3049068-3052860 FORWARD	744.416	2473.05	3.32213	0.301011
Brapa_ESTC031714	AT5G57040	Symbols: | lactoylglutathione lyase family protein / glyoxalase I family protein | chr5:23101261-23102342 REVERSE	6914.38	22967.8	3.32174	0.301047
Brapa_ESTC045977	AT5G40210	Symbols: | nodulin MtN21 family protein | chr5:16090953-16093316 REVERSE	416.605	1383.38	3.3206	0.30115
Brapa_ESTC018695	AT5G48030	Symbols: GFA2 | GFA2 (GAMETOPHYTIC FACTOR 2); heat shock protein binding / unfolded protein binding | chr5:19483524-19486979 REVERSE	408.221	1354.53	3.31813	0.301375
Brapa_ESTC049917	no_hits_f	---------	780.336	2588.92	3.3177	0.301414
Brapa_ESTC027378	AT3G08920	Symbols: | rhodanese-like domain-containing protein | chr3:2712280-2713123 FORWARD	3894.51	12920.7	3.31767	0.301416
Brapa_ESTC018789	AT1G60860	Symbols: | ARF GTPase-activating domain-containing protein | chr1:22404909-22411304 REVERSE	754.773	2503.67	3.31712	0.301467
Brapa_ESTC004397	AT4G34680	Symbols: | GATA transcription factor 3, putative (GATA-3) | chr4:16553705-16554615 FORWARD	631.556	2094.43	3.3163	0.301541
Brapa_ESTC012859	AT1G73470	Symbols: | similar to hypothetical protein slr0975 [Synechocystis sp. PCC 6803] (GB:NP_440211.1); similar to Os09g0448900 [Oryza sativa (japonica cultivar-group)] (GB:NP_001063318.1) | chr1:27628869-27631265 FORWARD	1509.68	5006.03	3.31595	0.301572
Brapa_ESTC016446	AT3G50210	| Symbols: | oxidoreductase | chr3:18625320-18627211 REVERSE	3036.47	10068	3.31569	0.301596
Brapa_ESTC019853	AT4G33080	| Symbols: | kinase | chr4:15960149-15963601 FORWARD	4872.63	16154.4	3.31533	0.301629
Brapa_ESTC023555	AT5G56360	Symbols: | calmodulin-binding protein | chr5:22840812-22845176 REVERSE	1009.69	3346.61	3.31449	0.301705
Brapa_ESTC026869	AT1G69520	Symbols: | methyltransferase-related | chr1:26131951-26133265 FORWARD	350.014	1160.02	3.31421	0.301731
Brapa_ESTC013749	AT2G36895	Symbols: | similar to Os03g0152600 [Oryza sativa (japonica cultivar-group)] (GB:NP_001048993.1); similar to expressed protein [Oryza sativa (japonica cultivar-group)] (GB:ABF94025.1) | chr2:15496255-15497375 REVERSE	1138.25	3770.94	3.31293	0.301848
Brapa_ESTC007697	AT4G19400	Symbols: | similar to Os05g0241400 [Oryza sativa (japonica cultivar-group)] (GB:NP_001055002.1); contains domain Profilin (actin-binding protein) (SSF55770); contains domain no description (G3D.3.30.450.30) | chr4:10581048-10581920 REVERSE	1951.68	6464.67	3.31236	0.301899
Brapa_ESTC036579	AT3G15310	Symbols: | similar to unknown protein [Arabidopsis thaliana] (TAIR:AT5G32621.1); similar to hypothetical protein 24.t00017 [Brassica oleracea] (GB:ABD64939.1); contains InterPro domain Protein of unknown function DUF635; (InterPro:IPR006912); contains InterPro domain Bacterial adhesion; (InterPro:IPR008966) | chr3:5152289-5153536 REVERSE	1345.94	4456.77	3.31127	0.301999
Brapa_ESTC043492	AT3G49340	Symbols: | cysteine proteinase, putative | chr3:18304332-18305562 REVERSE	1081.37	3580.41	3.31099	0.302024
Brapa_ESTC014587	AT4G10000	Symbols: | similar to unknown protein [Arabidopsis thaliana] (TAIR:AT5G03880.1); similar to hypothetical protein ABO_1568 [Alcanivorax borkumensis SK2] (GB:YP_693288.1); contains InterPro domain Thioredoxin-like fold; (InterPro:IPR012336); contains InterPro domain Thioredoxin fold; (InterPro:IPR012335) | chr4:6260704-6263050 REVERSE	1001.85	3317.05	3.31092	0.30203
Brapa_ESTC017258	AT1G12900	Symbols: GAPA-2 | GAPA-2; glyceraldehyde-3-phosphate dehydrogenase | chr1:4392632-4394281 REVERSE	4777.41	15807.2	3.30874	0.30223
Brapa_ESTC041976	AT2G40435	Symbols: | similar to unknown protein [Arabidopsis thaliana] (TAIR:AT3G56220.1); similar to Os03g0338400 [Oryza sativa (japonica cultivar-group)] (GB:NP_001050055.1); similar to hypothetical protein [Oryza sativa (japonica cultivar-group)] (GB:BAC10078.1); similar to Os05g0337200 [Oryza sativa (japonica cultivar-group)] (GB:NP_001055237.1); contains domain Regulatory domain in the aminoacid metab…	434.713	1438.32	3.30867	0.302237
Brapa_ESTC022000	AT3G25510	Symbols: | disease resistance protein (TIR-NBS-LRR class), putative | chr3:9262075-9270034 REVERSE	1039.63	3439.75	3.30863	0.30224
Brapa_ESTC042271	AT2G12480	Symbols: SCPL43 | SCPL43; serine carboxypeptidase | chr2:5076877-5079309 REVERSE	451.193	1492.81	3.30858	0.302244
Brapa_ESTC040077	AT1G26790	Symbols: | Dof-type zinc finger domain-containing protein | chr1:9273844-9275299 REVERSE	5172.88	17112.4	3.3081	0.302288
Brapa_ESTC047222	AT3G54880	Symbols: | similar to unknown protein [Arabidopsis thaliana] (TAIR:AT5G25360.1); similar to hypothetical protein [Picea mariana] (GB:AAC32109.1); similar to Os07g0479600 [Oryza sativa (japonica cultivar-group)] (GB:NP_001059637.1) | chr3:20348056-20348764 REVERSE	2018.25	6676.32	3.30797	0.3023
Brapa_ESTC008952	AT1G15820	Symbols: CP24, LHCB6 | LHCB6 (LIGHT HARVESTING COMPLEX PSII); chlorophyll binding | chr1:5446680-5447671 REVERSE	2075.82	6866.74	3.30797	0.302301
Brapa_ESTC042025	AT2G38760	Symbols: ANNAT3 | ANNAT3 (ANNEXIN 3, ANNEXIN ARABIDOPSIS 3); calcium ion binding / calcium-dependent phospholipid binding | chr2:16208164-16209568 FORWARD	1270.36	4201.51	3.30734	0.302358
Brapa_ESTC011936	AT5G11500	Symbols: | similar to unknown protein [Oryza sativa (japonica cultivar-group)] (GB:AAT07560.1); contains InterPro domain Protein of unknown function DUF814; (InterPro:IPR008532) | chr5:3676748-3678947 FORWARD	1572.41	5199.4	3.30664	0.302421
Brapa_ESTC050977	AT2G40810	Symbols: AtATG18c | AtATG18c (Arabidopsis thaliana homolog of yeast autophagy 18 (ATG18) c) | chr2:17039764-17041416 FORWARD	433.845	1434.06	3.30547	0.302529
Brapa_ESTC017281	AT4G22200	Symbols: AKT3, AKT2, AKT2/3 | AKT2 (Arabidopsis K+ transporter 2); cyclic nucleotide binding / inward rectifier potassium channel | chr4:11746678-11750103 REVERSE	1360.4	4494.08	3.3035	0.302709
Brapa_ESTC010014	AT5G49215	| Symbols: | polygalacturonase | chr5:19970896-19973100 FORWARD	1844.28	6089.96	3.30208	0.302839
Brapa_ESTC024749	AT3G50070	Symbols: CYCD3;3 | CYCD3;3 (CYCLIN D3;3); cyclin-dependent protein kinase | chr3:18576305-18577652 REVERSE	1874.84	6188.31	3.30071	0.302965
Brapa_ESTC036060	AT3G10572	Symbols: | 3-phosphoinositide-dependent protein kinase-1, putative | chr3:3304351-3306311 FORWARD	942.826	3108.65	3.29716	0.303291
Brapa_ESTC014375	AT5G36700	Symbols: | phosphoglycolate phosphatase, putative | chr5:14439159-14441660 REVERSE	6318.25	20819.3	3.29511	0.30348
Brapa_ESTC044922	AT4G32800	Symbols: | AP2 domain-containing transcription factor TINY, putative | chr4:15819816-15820481 FORWARD	529.135	1742.76	3.2936	0.303619
Brapa_ESTC037320	AT2G41820	Symbols: | leucine-rich repeat transmembrane protein kinase, putative | chr2:17454248-17456992 FORWARD	2261.68	7444.27	3.29148	0.303815
Brapa_ESTC010537	AT4G01050	Symbols: | hydroxyproline-rich glycoprotein family protein | chr4:455874-458175 FORWARD	1498.96	4932.14	3.29037	0.303917
Brapa_ESTC011609	AT5G26610	Symbols: | D111/G-patch domain-containing protein | chr5:9375459-9376994 FORWARD	2483.72	8172.24	3.29032	0.303922
Brapa_ESTC001289	AT3G59300	Symbols: | similar to unknown protein [Arabidopsis thaliana] (TAIR:AT5G24060.1); similar to expressed protein [Oryza sativa (japonica cultivar-group)] (GB:ABA94153.2); similar to Os01g0899500 [Oryza sativa (japonica cultivar-group)] (GB:NP_001045101.1) | chr3:21929644-21932854 FORWARD	759.625	2498.87	3.28961	0.303987
Brapa_ESTC026347	AT1G14410	Symbols: ATWHY1, PTAC1 | ATWHY1/PTAC1 (A. THALIANA WHIRLY 1, PLASTID TRANSCRIPTIONALLY ACTIVE1); DNA binding | chr1:4929347-4930805 REVERSE	5605.48	18432	3.28821	0.304117
Brapa_ESTC002099	AT4G01700	| Symbols: | chitinase, putative | chr4:732413-733487 REVERSE	859.467	2825.21	3.28717	0.304213
Brapa_ESTC023996	AT2G19170	Symbols: SLP3 | SLP3 (Subtilisin-like serine protease 3); subtilase | chr2:8321236-8324702 REVERSE	3717.38	12219.6	3.28715	0.304215
Brapa_ESTC018128	AT2G45330	Symbols: EMB1067 | EMB1067 (EMBRYO DEFECTIVE 1067); tRNA 2'-phosphotransferase | chr2:18693414-18694948 FORWARD	623.926	2050.25	3.28605	0.304317
Brapa_ESTC013231	AT5G18650	Symbols: | zinc finger (C3HC4-type RING finger) family protein | chr5:6218262-6220376 FORWARD	1189.52	3908.52	3.2858	0.30434
Brapa_ESTC020790	AT4G11640	Symbols: ATSR | ATSR (ARABIDOPSIS THALIANA SIGNAL-RESPONSIVE); serine racemase | chr4:7021764-7023246 FORWARD	478.468	1571.74	3.28494	0.304419
Brapa_ESTC016297	AT2G37690	Symbols: | phosphoribosylaminoimidazole carboxylase, putative / AIR carboxylase, putative | chr2:15813189-15817318 FORWARD	1006.99	3307.14	3.28418	0.30449
Brapa_ESTC027992	AT3G50630	Symbols: KRP2, ICK2 | ICK2 (KIP-RELATED PROTEIN 2) | chr3:18811489-18812347 FORWARD	934.396	3068.52	3.28396	0.30451
Brapa_ESTC034980	AT5G60190	Symbols: | Ulp1 protease family protein | chr5:24252545-24253225 FORWARD	691.529	2270.85	3.28381	0.304524
Brapa_ESTC025647	AT2G45790	Symbols: ATPMM | eukaryotic phosphomannomutase family protein | chr2:18862950-18864827 FORWARD	2153.44	7068.82	3.28257	0.304639
Brapa_ESTC025323	AT3G17470	Symbols: | RelA/SpoT domain-containing protein / calcium-binding EF-hand family protein | chr3:5979874-5981974 FORWARD	573.77	1883.4	3.2825	0.304646
Brapa_ESTC026387	no_hits_f	---------	706.477	2318.87	3.2823	0.304664
Brapa_ESTC012511	AT3G13110	Symbols: SAT-1, SAT-A, SAT3, AtSerat2;2 | AtSerat2;2 (SERINE ACETYLTRANSFERASE 1); serine O-acetyltransferase | chr3:4214946-4216121 REVERSE	585.048	1920.23	3.28218	0.304676
Brapa_ESTC043732	AT3G54880	Symbols: | similar to unknown protein [Arabidopsis thaliana] (TAIR:AT5G25360.1); similar to hypothetical protein [Picea mariana] (GB:AAC32109.1); similar to Os07g0479600 [Oryza sativa (japonica cultivar-group)] (GB:NP_001059637.1) | chr3:20348056-20348764 REVERSE	3453.03	11332.5	3.2819	0.304702
Brapa_ESTC009051	AT4G30870	Symbols: ATMUS81 | ATMUS81; endonuclease/ nucleic acid binding | chr4:15028592-15032467 FORWARD	3370.89	11061.5	3.28148	0.304741
Brapa_ESTC027065	AT1G02410	Symbols: | cytochrome c oxidase assembly protein CtaG / Cox11 family | chr1:491300-492762 FORWARD	2400.16	7876.05	3.28147	0.304742
Brapa_ESTC042177	AT2G47760	| Symbols: | catalytic | chr2:19572742-19575291 REVERSE	915.407	3002.02	3.27944	0.30493
Brapa_ESTC025556	AT3G49320	Symbols: | similar to unknown protein [Arabidopsis thaliana] (TAIR:AT5G41970.1); similar to LOC496075 protein [Xenopus laevis] (GB:AAH87491.1); similar to LOC496075 protein [Xenopus laevis] (GB:AAI06661.1); similar to Os02g0686600 [Oryza sativa (japonica cultivar-group)] (GB:NP_001047772.1); contains InterPro domain Metal-dependent protein hydrolase; (InterPro:IPR003226) | chr3:18299366-18301614 …	483.194	1583.31	3.27676	0.30518
Brapa_ESTC013915	AT4G09650	Symbols: | ATP synthase delta chain, chloroplast, putative / H(+)-transporting two-sector ATPase, delta (OSCP) subunit, putative | chr4:6100796-6101500 FORWARD	4667.49	15285	3.27478	0.305364
Brapa_ESTC003914	no_hits_f	---------	367.802	1204.03	3.27358	0.305476
Brapa_ESTC031474	AT1G27020	Symbols: | similar to unknown protein [Arabidopsis thaliana] (TAIR:AT1G27030.1); similar to unknown protein [Oryza sativa (japonica cultivar-group)] (GB:AAN05517.1); similar to Os10g0463800 [Oryza sativa (japonica cultivar-group)] (GB:NP_001064789.1) | chr1:9378622-9380406 FORWARD	5097.17	16685.5	3.27348	0.305485
Brapa_ESTC009915	AT5G38420	Symbols: | ribulose bisphosphate carboxylase small chain 2B / RuBisCO small subunit 2B (RBCS-2B) (ATS2B) | chr5:15398433-15399208 REVERSE	8608.05	28171.4	3.27268	0.30556
Brapa_ESTC013855	AT1G68660	Symbols: | similar to Os08g0432500 [Oryza sativa (japonica cultivar-group)] (GB:NP_001061868.1); similar to ATP-dependent Clp protease adaptor protein ClpS [Trichodesmium erythraeum IMS101] (GB:YP_720956.1); contains InterPro domain ATP-dependent Clp protease adaptor protein ClpS; (InterPro:IPR003769) | chr1:25781721-25782746 REVERSE	417.936	1367.34	3.27165	0.305656
Brapa_ESTC019717	AT1G29840	Symbols: | esterase/lipase/thioesterase family protein | chr1:10445719-10447406 REVERSE	1801.57	5893.06	3.27107	0.30571
Brapa_ESTC040750	AT1G75240	Symbols: ATHB33 | ATHB33 (ARABIDOPSIS THALIANA HOMEOBOX PROTEIN 33); DNA binding / transcription factor | chr1:28245237-28246166 FORWARD	2009.19	6571.48	3.27071	0.305744
Brapa_ESTC009484	AT2G01110	Symbols: UNE3, PGA2, TATC, APG2 | APG2 (ALBINO AND PALE GREEN 2) | chr2:83786-85088 REVERSE	4336.9	14175	3.26846	0.305954
Brapa_ESTC025646	AT2G45770	Symbols: FRD4, CPFTSY | CPFTSY (ferric reductase deficient 4); GTP binding | chr2:18858322-18860476 FORWARD	748.693	2447.05	3.26843	0.305957
Brapa_ESTC049213	AT5G12230	Symbols: | similar to unknown protein [Arabidopsis thaliana] (TAIR:AT5G19480.2); similar to expressed protein [Oryza sativa (japonica cultivar-group)] (GB:ABG22085.1); similar to Os12g0614000 [Oryza sativa (japonica cultivar-group)] (GB:NP_001067267.1) | chr5:3953916-3955286 REVERSE	614.297	2006.71	3.26668	0.306121
Brapa_ESTC022598	AT2G31560	Symbols: | similar to unknown protein [Arabidopsis thaliana] (TAIR:AT1G05870.2); similar to hypothetical protein [Oryza sativa (japonica cultivar-group)] (GB:BAB86085.1); similar to Os11g0282300 [Oryza sativa (japonica cultivar-group)] (GB:NP_001067693.1); similar to Os12g0230600 [Oryza sativa (japonica cultivar-group)] (GB:NP_001066444.1); contains InterPro domain Protein of unknown function DUF…	7009.83	22884.7	3.26466	0.306311
Brapa_ESTC034492	AT5G18640	Symbols: | lipase class 3 family protein | chr5:6213249-6215496 FORWARD	3957.23	12917.3	3.26423	0.306351
Brapa_ESTC025638	AT3G52920	Symbols: | similar to unknown protein [Arabidopsis thaliana] (TAIR:AT2G36410.2); similar to Os04g0408600 [Oryza sativa (japonica cultivar-group)] (GB:NP_001052720.1); similar to hypothetical protein [Ipomoea trifida] (GB:AAS79606.1); similar to OSJNBa0042I15.15 [Oryza sativa (japonica cultivar-group)] (GB:CAE04893.2); contains InterPro domain Protein of unknown function DUF662; (InterPro:IPR00703…	2562.15	8363.27	3.26416	0.306357
Brapa_ESTC006876	AT1G23890	Symbols: | NHL repeat-containing protein | chr1:8438889-8440792 REVERSE	3266.73	10661.1	3.26354	0.306416
Brapa_ESTC029071	AT3G27160	Symbols: GHS1 | GHS1 (GLUCOSE HYPERSENSITIVE 1); structural constituent of ribosome | chr3:10018768-10020091 FORWARD	10019.7	32679.3	3.2615	0.306607
Brapa_ESTC020821	AT4G10150	Symbols: | zinc finger (C3HC4-type RING finger) family protein | chr4:6328132-6329554 FORWARD	465.404	1517.74	3.26112	0.306643
Brapa_ESTC051407	no_hits_f	---------	765.051	2494.46	3.26051	0.3067
Brapa_ESTC018098	AT3G09980	Symbols: | similar to unknown protein [Arabidopsis thaliana] (TAIR:AT5G03660.1); similar to hypothetical protein [Ipomoea trifida] (GB:AAS79606.1); contains InterPro domain Protein of unknown function DUF662; (InterPro:IPR007033); contains InterPro domain t-snare; (InterPro:IPR010989) | chr3:3069363-3071150 FORWARD	1091.74	3558.64	3.2596	0.306786
Brapa_ESTC014489	AT5G18480	Symbols: PGSIP6 | glycogenin glucosyltransferase (glycogenin)-related | chr5:6131309-6133789 REVERSE	460.362	1500.01	3.25833	0.306906
Brapa_ESTC022582	AT3G22790	Symbols: | kinase interacting family protein | chr3:8052453-8057895 REVERSE	521.528	1698.75	3.25726	0.307007
Brapa_ESTC051118	no_hits_f	---------	672.703	2190.88	3.25683	0.307047
Brapa_ESTC017453	AT5G54570	Symbols: | glycosyl hydrolase family 1 protein | chr5:22184862-22187461 REVERSE	550.945	1794.1	3.2564	0.307087
Brapa_ESTC013186	AT4G09970	| Symbols: | unknown protein | chr4:6246035-6247594 FORWARD	2774.14	9024.3	3.25301	0.307408
Brapa_ESTC010685	AT2G21960	Symbols: | similar to unknown protein [Arabidopsis thaliana] (TAIR:AT1G56180.1); similar to Os04g0639300 [Oryza sativa (japonica cultivar-group)] (GB:NP_001054033.1); similar to OSJNBb0003B01.9 [Oryza sativa (japonica cultivar-group)] (GB:CAE03618.3); similar to unnamed protein product [Ostreococcus tauri] (GB:CAL58559.1) | chr2:9362070-9364038 FORWARD	374.402	1217.81	3.25268	0.307439
Brapa_ESTC036513	AT3G15140	Symbols: | exonuclease family protein | chr3:5099719-5101724 REVERSE	1842.66	5993.35	3.25255	0.307451
Brapa_ESTC028435	AT1G61520	Symbols: LHCA3 | LHCA3 (Photosystem I light harvesting complex gene 3); chlorophyll binding | chr1:22703817-22704814 FORWARD	3580.04	11643	3.2522	0.307484
Brapa_ESTC003673	AT2G33855	Symbols: | similar to OSIGBa0106G07.5 [Oryza sativa (indica cultivar-group)] (GB:CAH67309.1); similar to Os04g0475300 [Oryza sativa (japonica cultivar-group)] (GB:NP_001053073.1) | chr2:14331793-14332227 REVERSE	6519.32	21199.2	3.25175	0.307527
Brapa_ESTC026945	AT1G20190	Symbols: EXP11, ATEXP11, ATHEXP ALPHA 1.14, ATEXPA11 | ATEXPA11 (ARABIDOPSIS THALIANA EXPANSIN A11) | chr1:6998753-6999701 REVERSE	1207.07	3924.14	3.25096	0.307601
Brapa_ESTC030072	AT5G05610	Symbols: | PHD finger family protein | chr5:1677332-1678943 REVERSE	7028.57	22844.4	3.25022	0.307671
Brapa_ESTC039423	AT1G09440	Symbols: | protein kinase family protein | chr1:3045515-3047395 REVERSE	1489.31	4835.13	3.24656	0.308019
Brapa_ESTC018557	AT5G60900	Symbols: RLK1 | RLK1 (RECEPTOR-LIKE PROTEIN KINASE 1); carbohydrate binding / kinase | chr5:24515693-24518720 REVERSE	750.049	2432.84	3.24357	0.308302
Brapa_ESTC002830	AT1G75220	Symbols: | integral membrane protein, putative | chr1:28233073-28236267 REVERSE	1670.49	5414.3	3.24114	0.308533
Brapa_ESTC046857	AT5G52750	Symbols: | heavy-metal-associated domain-containing protein | chr5:21401360-21402021 FORWARD	928.933	3009.6	3.23985	0.308657
Brapa_ESTC022922	AT3G13120	Symbols: | 30S ribosomal protein S10, chloroplast, putative | chr3:4220317-4221533 REVERSE	7471.38	24192	3.23796	0.308837
Brapa_ESTC049123	no_hits_f	---------	7122.02	23058	3.23756	0.308874
Brapa_ESTC042916	AT3G12180	Symbols: | cornichon family protein | chr3:3883471-3884577 FORWARD	1851.95	5982.86	3.23057	0.309543
Brapa_ESTC025327	AT5G36700	Symbols: | phosphoglycolate phosphatase, putative | chr5:14439159-14441660 REVERSE	6892.93	22258.4	3.22916	0.309678
Brapa_ESTC050213	no_hits_f	---------	1751.1	5653.22	3.22838	0.309753
Brapa_ESTC042336	AT2G04845	Symbols: | GCN5-related N-acetyltransferase (GNAT) family protein | chr2:1702338-1703990 REVERSE	2467.25	7965.18	3.22836	0.309754
Brapa_ESTC027430	AT1G77350	Symbols: | similar to unknown protein [Oryza sativa (japonica cultivar-group)] (GB:AAT01331.1); similar to Os05g0486200 [Oryza sativa (japonica cultivar-group)] (GB:NP_001055878.1) | chr1:29075391-29076439 FORWARD	3144.44	10148.6	3.22747	0.30984
Brapa_ESTC019300	AT4G31020	Symbols: | similar to unknown protein [Arabidopsis thaliana] (TAIR:AT2G24320.1); similar to Esterase/lipase/thioesterase [Medicago truncatula] (GB:ABD32255.1); similar to Os02g0796600 [Oryza sativa (japonica cultivar-group)] (GB:NP_001048390.1); contains InterPro domain Esterase/lipase/thioesterase; (InterPro:IPR000379) | chr4:15108838-15110085 REVERSE	905.732	2922.53	3.22671	0.309914
Brapa_ESTC004331	AT2G18390	Symbols: ATARLC1, HAL, ARL2, TTN5 | TTN5 (TITAN 5); GTP binding | chr2:7995417-7996456 FORWARD	644.481	2079.48	3.2266	0.309924
Brapa_ESTC023002	AT4G22100	Symbols: | glycosyl hydrolase family 1 protein | chr4:11707382-11709944 REVERSE	1525.09	4916.21	3.22355	0.310217
Brapa_ESTC001948	AT5G43060	Symbols: | cysteine proteinase, putative / thiol protease, putative | chr5:17287012-17289345 REVERSE	8433.97	27180.5	3.22274	0.310295
Brapa_ESTC023058	AT1G20340	Symbols: DRT112 | DRT112 (DNA-damage-repair/toleration protein 112); copper ion binding / electron carrier | chr1:7042760-7043263 REVERSE	7646.8	24623.8	3.22014	0.310545
Brapa_ESTC013274	AT1G50320	Symbols: ATX, ATHX | ATHX (THIOREDOXIN X); thiol-disulfide exchange intermediate | chr1:18642274-18643132 REVERSE	3992.67	12852.2	3.21895	0.31066
Brapa_ESTC019945	AT1G20340	Symbols: DRT112 | DRT112 (DNA-damage-repair/toleration protein 112); copper ion binding / electron carrier | chr1:7042760-7043263 REVERSE	5335.39	17166	3.21738	0.310811
Brapa_ESTC024965	AT3G60800	Symbols: | zinc finger (DHHC type) family protein | chr3:22478461-22480248 REVERSE	2804.33	9020.69	3.2167	0.310878
Brapa_ESTC015455	AT1G66130	Symbols: | oxidoreductase N-terminal domain-containing protein | chr1:24618703-24620405 FORWARD	317.846	1022.39	3.21662	0.310885
Brapa_ESTC031349	AT4G04635	Symbols: | DNA binding / transposase | chr4:2347901-2349154 FORWARD	1054.58	3391.13	3.21562	0.310982
Brapa_ESTC010294	AT5G27620	Symbols: CYCH;1 | CYCH;1 (CYCLIN H;1); cyclin-dependent protein kinase/ protein binding / protein kinase | chr5:9771765-9774687 FORWARD	1342.34	4315.91	3.21521	0.311021
Brapa_ESTC011065	AT5G17400	Symbols: | ADP, ATP carrier protein, mitochondrial, putative / ADP/ATP translocase, putative / adenine nucleotide translocator, putative | chr5:5729017-5730106 REVERSE	455.109	1462.81	3.2142	0.31112
Brapa_ESTC035553	AT3G56400	Symbols: ATWRKY70, WRKY70 | WRKY70 (WRKY DNA-binding protein 70); transcription factor | chr3:20920061-20921388 REVERSE	1449.12	4656.95	3.21364	0.311174
Brapa_ESTC019769	AT1G70830	Symbols: MLP28 | MLP28 (MLP-LIKE PROTEIN 28) | chr1:26713865-26715057 REVERSE	1896.69	6093.9	3.21291	0.311244
Brapa_ESTC049519	no_hits_f	---------	655.99	2107.56	3.21279	0.311256
Brapa_ESTC025656	AT1G66330	Symbols: | senescence-associated family protein | chr1:24733543-24735807 REVERSE	1873.21	6017.53	3.21242	0.311292
Brapa_ESTC004683	AT1G73470	Symbols: | similar to hypothetical protein slr0975 [Synechocystis sp. PCC 6803] (GB:NP_440211.1); similar to Os09g0448900 [Oryza sativa (japonica cultivar-group)] (GB:NP_001063318.1) | chr1:27629514-27631265 FORWARD	1693.25	5439.42	3.21241	0.311292
Brapa_ESTC050479	no_hits_f	---------	694.656	2231.46	3.21232	0.311301
Brapa_ESTC009439	AT5G44190	Symbols: ATGLK2, GPRI2, GLK2 | GLK2 (GOLDEN2-LIKE 2); DNA binding / transcription factor | chr5:17815662-17817874 FORWARD	1970.91	6330.33	3.21188	0.311344
Brapa_ESTC037154	AT5G59660	Symbols: | leucine-rich repeat protein kinase, putative | chr5:24052913-24057205 FORWARD	429.138	1377.19	3.2092	0.311604
Brapa_ESTC038127	AT1G20850	Symbols: XCP2 | XCP2 (XYLEM CYSTEINE PEPTIDASE 2); cysteine-type peptidase/ peptidase | chr1:7252197-7253526 FORWARD	583.266	1871.29	3.2083	0.311692
Brapa_ESTC007721	AT1G69530	Symbols: EXP1, AT-EXP1, ATEXP1, ATHEXP ALPHA 1.2, ATEXPA1 | ATEXPA1 (ARABIDOPSIS THALIANA EXPANSIN A1) | chr1:26145697-26146714 FORWARD	2928	9392.11	3.20769	0.311751
Brapa_ESTC006051	AT4G37560	Symbols: | formamidase, putative / formamide amidohydrolase, putative | chr4:17646483-17648451 FORWARD	1078.96	3460.05	3.20684	0.311834
Brapa_ESTC031191	AT5G44560	| Symbols: | SNF7 family protein | chr5:17963308-17965449 FORWARD	1090.43	3495.52	3.20563	0.311951
Brapa_ESTC027736	AT3G29240	Symbols: | similar to unknown protein [Arabidopsis thaliana] (TAIR:AT1G33780.1); similar to Os10g0330400 [Oryza sativa (japonica cultivar-group)] (GB:NP_001064365.1); similar to Protein of unknown function DUF179 [Medicago truncatula] (GB:ABE94310.1); contains InterPro domain Protein of unknown function DUF179; (InterPro:IPR003774) | chr3:11193017-11194105 FORWARD	4088.84	13107.3	3.20563	0.311951
Brapa_ESTC008368	AT1G74920	Symbols: ALDH10A8 | ALDH10A8 (Aldehyde dehydrogenase 10A8); 3-chloroallyl aldehyde dehydrogenase | chr1:28142836-28146234 REVERSE	1359.46	4356.82	3.20482	0.31203
Brapa_ESTC026127	AT3G61770	Symbols: | similar to unknown protein [Arabidopsis thaliana] (TAIR:AT1G67600.1); similar to Os05g0534100 [Oryza sativa (japonica cultivar-group)] (GB:NP_001056147.1); similar to hypothetical protein DSY2350 [Desulfitobacterium hafniense Y51] (GB:YP_518583.1); contains InterPro domain Acid phosphatase/vanadium-dependent haloperoxidase; (InterPro:IPR008934); contains InterPro domain Acid phosphatas…	2461.37	7887.17	3.20438	0.312073
Brapa_ESTC046709	AT5G65840	Symbols: | similar to unknown protein [Arabidopsis thaliana] (TAIR:AT2G37240.1); similar to Os03g0729300 [Oryza sativa (japonica cultivar-group)] (GB:NP_001051154.1); similar to expressed protein [Oryza sativa (japonica cultivar-group)] (GB:ABF98680.1); similar to Os03g0729200 [Oryza sativa (japonica cultivar-group)] (GB:NP_001051153.1); contains InterPro domain Thioredoxin-like fold; (InterPro:I…	3560.16	11406.3	3.20387	0.312122
Brapa_ESTC023931	AT5G36700	Symbols: | phosphoglycolate phosphatase, putative | chr5:14439159-14441660 REVERSE	4550.93	14575.2	3.20269	0.312238
Brapa_ESTC000329	AT3G02700	Symbols: | NC domain-containing protein | chr3:581734-582820 REVERSE	1922.44	6156.52	3.20245	0.312261
Brapa_ESTC005535	AT2G46430	Symbols: CNGC3, ATCNGC3 | ATCNGC3 (CYCLIC NUCLEOTIDE GATED CHANNEL 3); calmodulin binding / cyclic nucleotide binding / ion channel | chr2:19065545-19068346 FORWARD	4961.85	15889.2	3.20227	0.312278
Brapa_ESTC049993	AT3G04340	Symbols: EMB2458 | EMB2458 (EMBRYO DEFECTIVE 2458); ATPase | chr3:1146950-1151917 REVERSE	425.132	1361.35	3.20218	0.312287
Brapa_ESTC017554	AT5G46280	Symbols: | DNA replication licensing factor, putative | chr5:18787129-18790833 REVERSE	1806.53	5784.75	3.20213	0.312292
Brapa_ESTC005914	no_hits_f	---------	402.879	1289.71	3.20123	0.31238
Brapa_ESTC005401	AT5G43180	Symbols: | similar to unknown protein [Arabidopsis thaliana] (TAIR:AT4G31330.1); similar to Os09g0494600 [Oryza sativa (japonica cultivar-group)] (GB:NP_001063551.1); similar to hypothetical protein [Oryza sativa (japonica cultivar-group)] (GB:BAC55679.1); similar to Os08g0521000 [Oryza sativa (japonica cultivar-group)] (GB:NP_001062272.1); contains InterPro domain Protein of unknown function DUF…	816.374	2613.18	3.20096	0.312406
Brapa_ESTC040664	AT1G77580	Symbols: | myosin heavy chain-related | chr1:29149526-29151494 REVERSE	483.586	1547.52	3.20009	0.312491
Brapa_ESTC050958	no_hits_f	---------	2289.57	7320.78	3.19745	0.312749
Brapa_ESTC010524	AT3G54890	Symbols: LHCA1 | LHCA1; chlorophyll binding | chr3:20350684-20351900 REVERSE	8630.12	27583.7	3.19621	0.31287
Brapa_ESTC050681	AT5G05140	Symbols: | transcription elongation factor-related | chr5:1520354-1522298 FORWARD	1580.9	5051.93	3.1956	0.31293
Brapa_ESTC017977	AT5G46280	Symbols: | DNA replication licensing factor, putative | chr5:18787129-18790833 REVERSE	698.693	2232.22	3.19485	0.313004
Brapa_ESTC013118	AT4G09750	Symbols: | short-chain dehydrogenase/reductase (SDR) family protein | chr4:6146767-6148695 FORWARD	2823.01	9014.95	3.19338	0.313148
Brapa_ESTC014461	AT2G38680	Symbols: | pyrimidine 5'-nucleotidase family protein / uridine monophosphate hydrolase-1 (UMPH-1) family protein | chr2:16181536-16182951 REVERSE	543.171	1734.17	3.19268	0.313217
Brapa_ESTC022898	AT5G36120	| Symbols: | YGGT family protein | chr5:14215909-14216433 REVERSE	2826.99	9024.94	3.19242	0.313242
Brapa_ESTC015636	AT5G35630	Symbols: GLN2, ATGSL1, GS2 | GS2 (GLUTAMINE SYNTHETASE 2) | chr5:13848450-13850469 FORWARD	4241.91	13539.8	3.19191	0.313292
Brapa_ESTC019038	AT3G09470	Symbols: | Identical to UNC93-like protein [Arabidopsis Thaliana] (GB:Q94AA1;GB:Q67XL1;GB:Q67Y57;GB:Q9SF56); similar to Protein of unknown function DUF895, eukaryotic [Medicago truncatula] (GB:ABE82090.1); contains InterPro domain Protein of unknown function DUF895, eukaryotic; (InterPro:IPR010291) | chr3:2911674-2914416 REVERSE	1050.55	3347.63	3.18655	0.313819
Brapa_ESTC043733	AT3G54890	Symbols: LHCA1 | LHCA1; chlorophyll binding | chr3:20350684-20351900 REVERSE	8950.09	28509.9	3.18543	0.313929
Brapa_ESTC015642	AT3G48820	Symbols: | glycosyl transferase family 29 protein / sialyltransferase family protein | chr3:18111091-18113837 REVERSE	634.591	2021.26	3.18514	0.313958
Brapa_ESTC005307	AT5G49730	Symbols: ATFRO6, FRO6 | ATFRO6/FRO6 (FERRIC REDUCTION OXIDASE 6); ferric-chelate reductase/ oxidoreductase | chr5:20218581-20221681 REVERSE	458.229	1459.48	3.18505	0.313967
Brapa_ESTC001227	AT5G27380	Symbols: GSH2, GSHB | GSH2 (GLUTATHIONE SYNTHETASE 2); glutathione synthase | chr5:9668214-9670915 REVERSE	435.751	1386.86	3.18269	0.3142
Brapa_ESTC015991	AT5G13270	Symbols: | pentatricopeptide (PPR) repeat-containing protein | chr5:4246957-4249215 REVERSE	572.572	1822.15	3.18239	0.314229
Brapa_ESTC022400	no_hits_f	---------	3543.53	11268.4	3.17999	0.314466
Brapa_ESTC025006	AT5G36100	Symbols: | similar to unknown protein [Arabidopsis thaliana] (TAIR:AT1G65090.1) | chr5:14210085-14210884 REVERSE	594.88	1891.67	3.17992	0.314473
Brapa_ESTC044412	AT3G16000	Symbols: MFP1 | MFP1 (MAR BINDING FILAMENT-LIKE PROTEIN 1) | chr3:5431047-5433619 REVERSE	3644.55	11587.4	3.17938	0.314527
Brapa_ESTC034582	no_hits_f	---------	641.495	2038.48	3.1777	0.314693
Brapa_ESTC022070	AT2G47790	Symbols: | transducin family protein / WD-40 repeat family protein | chr2:19578172-19580016 REVERSE	832.452	2645.17	3.17756	0.314706
Brapa_ESTC035857	AT1G10600	Symbols: | similar to mov34 family protein [Arabidopsis thaliana] (TAIR:AT1G48790.1); similar to Os01g0661500 [Oryza sativa (japonica cultivar-group)] (GB:NP_001043779.1); similar to ALM beta-like [Oryza sativa (japonica cultivar-group)] (GB:BAD72364.1); contains InterPro domain Mov34/MPN/PAD-1; (InterPro:IPR000555); contains InterPro domain Mov34-1; (InterPro:IPR003639) | chr1:3503766-3505191 FO…	1185.36	3765.13	3.17636	0.314826
Brapa_ESTC014402	AT2G40750	Symbols: ATWRKY54, WRKY54 | WRKY54 (WRKY DNA-binding protein 54); transcription factor | chr2:17007714-17009432 REVERSE	321.621	1021.19	3.17513	0.314947
Brapa_ESTC011983	AT1G14280	Symbols: PKS2 | PKS2 (PHYTOCHROME KINASE SUBSTRATE 2) | chr1:4877652-4878980 FORWARD	8710.83	27641	3.17318	0.315142
Brapa_ESTC049134	no_hits_f	---------	581.533	1844.75	3.17222	0.315237
Brapa_ESTC004322	AT3G25120	Symbols: | mitochondrial import inner membrane translocase subunit Tim17/Tim22/Tim23 family protein | chr3:9149792-9151075 REVERSE	391.004	1240.15	3.17171	0.315288
Brapa_ESTC016562	AT5G44190	Symbols: ATGLK2, GPRI2, GLK2 | GLK2 (GOLDEN2-LIKE 2); DNA binding / transcription factor | chr5:17815662-17817874 FORWARD	1071.66	3398.53	3.17128	0.31533
Brapa_ESTC026170	AT1G24160	Symbols: | similar to unknown protein [Arabidopsis thaliana] (TAIR:AT1G70100.3); similar to Targeting for Xklp2 [Medicago truncatula] (GB:ABE84619.1) | chr1:8553658-8555819 REVERSE	325.155	1030.71	3.1699	0.315467
Brapa_ESTC007273	AT4G34640	Symbols: ERG9, SQS1 | SQS1 (SQUALENE SYNTHASE 1); farnesyl-diphosphate farnesyltransferase | chr4:16538494-16541660 FORWARD	1953.79	6190.44	3.16843	0.315614
Brapa_ESTC038786	AT4G17570	Symbols: | zinc finger (GATA type) family protein | chr4:9784342-9786987 REVERSE	639.834	2025.83	3.16618	0.315838
Brapa_ESTC007451	AT5G41960	Symbols: | similar to Os04g0585600 [Oryza sativa (japonica cultivar-group)] (GB:NP_001053679.1); similar to H0307D04.4 [Oryza sativa (indica cultivar-group)] (GB:CAH66859.1) | chr5:16806988-16808096 FORWARD	1437.87	4549.56	3.1641	0.316046
Brapa_ESTC025899	AT1G06210	Symbols: | VHS domain-containing protein / GAT domain-containing protein | chr1:1897566-1898985 FORWARD	4877.54	15432.2	3.16393	0.316063
Brapa_ESTC005984	AT1G75240	Symbols: ATHB33 | ATHB33 (ARABIDOPSIS THALIANA HOMEOBOX PROTEIN 33); DNA binding / transcription factor | chr1:28245237-28246166 FORWARD	1823.19	5766.31	3.16276	0.31618
Brapa_ESTC027473	AT5G23770	Symbols: | agenet domain-containing protein | chr5:8014516-8016274 REVERSE	635.792	2010.62	3.16239	0.316217
Brapa_ESTC008065	AT5G63370	Symbols: | protein kinase family protein | chr5:25402180-25404018 REVERSE	1094.55	3461.12	3.16214	0.316242
Brapa_ESTC028371	AT1G72730	Symbols: | eukaryotic translation initiation factor 4A, putative / eIF-4A, putative | chr1:27381702-27383255 REVERSE	2350.91	7432.01	3.16133	0.316322
Brapa_ESTC029629	no_hits_f	---------	1209.21	3822.51	3.16116	0.316339
Brapa_ESTC003425	AT1G60950	Symbols: ATFD2, FED A | FED A (FERREDOXIN 2); electron carrier/ iron ion binding | chr1:22448230-22448676 FORWARD	4844.13	15308.1	3.16013	0.316442
Brapa_ESTC010576	AT3G25030	Symbols: | calmodulin binding / protein binding / zinc ion binding | chr3:9122657-9123409 FORWARD	4622.99	14604.2	3.15904	0.316552
Brapa_ESTC019134	AT4G24350	Symbols: | phosphorylase family protein | chr4:12609647-12611338 FORWARD	5465.88	17265.4	3.15876	0.31658
Brapa_ESTC051408	no_hits_f	---------	1387.73	4382.99	3.15839	0.316617
Brapa_ESTC050848	no_hits_f	---------	721.898	2279.75	3.15799	0.316657
Brapa_ESTC013150	AT1G07440	Symbols: | tropinone reductase, putative / tropine dehydrogenase, putative | chr1:2286433-2287662 REVERSE	1176.75	3713.24	3.1555	0.316907
Brapa_ESTC034916	AT1G75090	Symbols: | methyladenine glycosylase family protein | chr1:28191308-28193273 REVERSE	1237.74	3905.3	3.15519	0.316939
Brapa_ESTC047286	no_hits_f	---------	723.955	2284.1	3.15503	0.316954
Brapa_ESTC041374	no_hits_f	---------	329.769	1038.53	3.14927	0.317534
Brapa_ESTC016945	AT1G73655	Symbols: | immunophilin / FKBP-type peptidyl-prolyl cis-trans isomerase family protein | chr1:27694129-27695442 REVERSE	2583.88	8137.14	3.14919	0.317542
Brapa_ESTC047688	AT3G43120	Symbols: | auxin-responsive protein-related | chr3:15105632-15106300 FORWARD	330.546	1040.86	3.14891	0.31757
Brapa_ESTC051728	no_hits_f	---------	3214.24	10120.2	3.14855	0.317606
Brapa_ESTC001640	AT5G15880	Symbols: | similar to unknown protein [Arabidopsis thaliana] (TAIR:AT2G32240.1); similar to hypothetical protein [Cleome spinosa] (GB:ABD96950.1); contains InterPro domain Prefoldin; (InterPro:IPR009053) | chr5:5185791-5187464 FORWARD	503.69	1585.65	3.14807	0.317655
Brapa_ESTC044362	AT4G22140	| Symbols: | DNA binding | chr4:11728105-11730242 REVERSE	1134.93	3572.55	3.14782	0.317681
Brapa_ESTC013133	AT2G17720	Symbols: | oxidoreductase, 2OG-Fe(II) oxygenase family protein | chr2:7704595-7706256 FORWARD	2598.23	8177.84	3.14747	0.317716
Brapa_ESTC013786	AT3G12180	Symbols: | cornichon family protein | chr3:3883471-3884577 FORWARD	629.341	1980.61	3.14712	0.317751
Brapa_ESTC033200	AT5G60900	Symbols: RLK1 | RLK1 (RECEPTOR-LIKE PROTEIN KINASE 1); carbohydrate binding / kinase | chr5:24515693-24518720 REVERSE	575.086	1809.32	3.14617	0.317846
Brapa_ESTC012736	AT2G37240	Symbols: | Identical to UPF0308 protein At2g37240, chloroplast precursor [Arabidopsis Thaliana] (GB:Q9ZUU2;GB:Q94A62); similar to unknown protein [Arabidopsis thaliana] (TAIR:AT5G65840.1); similar to Os03g0284600 [Oryza sativa (japonica cultivar-group)] (GB:NP_001049763.1); similar to PREDICTED: similar to TPA_exp: C9ORF21 isoform 2 [Pan troglodytes] (GB:XP_520707.2); similar to Os03g0729200 [Ory…	795.06	2500.88	3.14552	0.317912
Brapa_ESTC018265	AT4G33740	Symbols: | similar to unknown protein [Arabidopsis thaliana] (TAIR:AT2G22795.1); similar to conserved hypothetical protein [Medicago truncatula] (GB:ABE84763.1) | chr4:16187387-16188070 FORWARD	3416.98	10747.9	3.14544	0.317921
Brapa_ESTC006429	AT3G04260	Symbols: PTAC3 | PTAC3 (PLASTID TRANSCRIPTIONALLY ACTIVE3); DNA binding | chr3:1123238-1127522 REVERSE	667.249	2097.44	3.14341	0.318125
Brapa_ESTC004823	AT2G19720	Symbols: RPS15AB | RPS15AB (ribosomal protein S15A B); structural constituent of ribosome | chr2:8517305-8518340 REVERSE	1609.17	5055.56	3.14172	0.318297
Brapa_ESTC033064	AT3G50470	Symbols: HR3 | HR3 (HOMOLOG OF RPW8 3) | chr3:18740127-18741143 FORWARD	640.361	2011.76	3.1416	0.318309
Brapa_ESTC033722	AT5G43670	Symbols: | transport protein, putative | chr5:17556252-17558960 REVERSE	870.425	2733.42	3.14033	0.318438
Brapa_ESTC020350	AT1G48350	Symbols: | ribosomal protein L18 family protein | chr1:17870937-17871883 FORWARD	2109.67	6623.92	3.13979	0.318493
Brapa_ESTC017706	AT5G52420	Symbols: | similar to unknown protein [Arabidopsis thaliana] (TAIR:AT5G23920.1); similar to Os10g0548100 [Oryza sativa (japonica cultivar-group)] (GB:NP_001065301.1); similar to unknown [Xerophyta humilis] (GB:AAT45003.1) | chr5:21299043-21299771 FORWARD	332.311	1043.14	3.13905	0.318568
Brapa_ESTC015530	AT2G01590	| Symbols: | unknown protein | chr2:266674-267378 FORWARD	5700.32	17892.6	3.13888	0.318585
Brapa_ESTC013136	AT1G29240	Symbols: | similar to unknown protein [Arabidopsis thaliana] (TAIR:AT2G34170.1); similar to Protein of unknown function DUF688 [Medicago truncatula] (GB:ABE80249.1); contains InterPro domain Protein of unknown function DUF688; (InterPro:IPR007789) | chr1:10217009-10218910 REVERSE	423.275	1328.38	3.13834	0.31864
Brapa_ESTC019054	AT5G63970	Symbols: | protein binding / zinc ion binding | chr5:25624232-25626142 REVERSE	786.73	2468.49	3.13766	0.318709
Brapa_ESTC021103	AT5G44560	| Symbols: | SNF7 family protein | chr5:17963308-17965449 FORWARD	1093.41	3430.16	3.13712	0.318764
Brapa_ESTC037586	AT3G05520	Symbols: | F-actin capping protein alpha subunit family protein | chr3:1598617-1601140 FORWARD	2937.86	9212.86	3.13591	0.318887
Brapa_ESTC014584	AT2G45510	Symbols: CYP704A2 | CYP704A2 (cytochrome P450, family 704, subfamily A, polypeptide 2); oxygen binding | chr2:18760159-18762018 FORWARD	992.044	3110.94	3.13589	0.318889
Brapa_ESTC038160	AT3G18870	Symbols: | mitochondrial transcription termination factor-related / mTERF-related | chr3:6508521-6509345 REVERSE	493.202	1546.22	3.13506	0.318973
Brapa_ESTC048637	AT2G26260	Symbols: AT3BETAHSD/D2 | AT3BETAHSD/D2 (3BETA-HYDROXYSTEROID-DEHYDROGENASE/DECARBOXYLASE ISOFORM 2); 3-beta-hydroxy-delta5-steroid dehydrogenase | chr2:11185664-11189950 FORWARD	773.462	2423.37	3.13315	0.319168
Brapa_ESTC018360	AT2G19170	Symbols: SLP3 | SLP3 (Subtilisin-like serine protease 3); subtilase | chr2:8321236-8324702 REVERSE	591.286	1852.25	3.13258	0.319226
Brapa_ESTC025606	AT1G72530	Symbols: | plastid developmental protein DAG, putative | chr1:27316661-27317599 FORWARD	776.674	2432.69	3.13219	0.319266
Brapa_ESTC037125	AT3G28670	Symbols: | oxidoreductase/ zinc ion binding | chr3:10745420-10748220 FORWARD	3775.34	11818.7	3.1305	0.319438
Brapa_ESTC022471	AT3G25530	Symbols: GHBDH, ATGHBDH | ATGHBDH/GHBDH; phosphogluconate dehydrogenase (decarboxylating) | chr3:9273186-9274751 REVERSE	2248.83	7039.23	3.13017	0.319471
Brapa_ESTC005790	AT3G21720	Symbols: | isocitrate lyase, putative | chr3:7652796-7655880 REVERSE	5389.74	16864.8	3.12906	0.319585
Brapa_ESTC004142	no_hits_f	---------	766.002	2396.09	3.12805	0.319688
Brapa_ESTC014034	AT1G07320	Symbols: RPL4 | RPL4 (ribosomal protein L4); structural constituent of ribosome | chr1:2249189-2250172 FORWARD	7414.69	23188.2	3.12733	0.319761
Brapa_ESTC023886	AT4G22840	Symbols: | bile acid:sodium symporter family protein | chr4:11991647-11993687 REVERSE	830.213	2596.29	3.12726	0.319769
Brapa_ESTC014985	AT4G35550	Symbols: | homeobox-leucine zipper protein (HB-2) / HD-ZIP protein | chr4:16875819-16877172 REVERSE	938.66	2934.1	3.12584	0.319914
Brapa_ESTC023502	AT5G63790	Symbols: ANAC102 | ANAC102 (Arabidopsis NAC domain containing protein 102); transcription factor | chr5:25544113-25545239 REVERSE	7616.52	23803.3	3.12522	0.319977
Brapa_ESTC010030	AT1G08380	Symbols: PSAO | PSAO (photosystem I subunit O) | chr1:2641001-2641736 REVERSE	11291	35283.6	3.12493	0.320007
Brapa_ESTC022677	AT1G48350	Symbols: | ribosomal protein L18 family protein | chr1:17870937-17871883 FORWARD	8140.5	25430.6	3.12396	0.320106
Brapa_ESTC031592	no_hits_f	---------	558.803	1745.61	3.12384	0.320119
Brapa_ESTC031457	AT1G27150	| Symbols: | binding | chr1:9429164-9432055 FORWARD	3004.87	9385.73	3.12351	0.320153
Brapa_ESTC026117	AT1G14270	Symbols: | CAAX amino terminal protease family protein | chr1:4875094-4876438 REVERSE	2171.21	6780.53	3.12293	0.320212
Brapa_ESTC015667	AT5G46280	Symbols: | DNA replication licensing factor, putative | chr5:18787129-18790833 REVERSE	1067.69	3334.21	3.12283	0.320223
Brapa_ESTC010323	AT1G69530	Symbols: EXP1, AT-EXP1, ATEXP1, ATHEXP ALPHA 1.2, ATEXPA1 | ATEXPA1 (ARABIDOPSIS THALIANA EXPANSIN A1) | chr1:26145697-26146714 FORWARD	3247.04	10138.9	3.12251	0.320256
Brapa_ESTC036542	AT3G15200	Symbols: | pentatricopeptide (PPR) repeat-containing protein | chr3:5117496-5119067 REVERSE	1517.34	4736.31	3.12146	0.320363
Brapa_ESTC043851	AT3G57190	Symbols: | peptide chain release factor, putative | chr3:21177447-21179177 FORWARD	469.642	1465.8	3.1211	0.3204
Brapa_ESTC021008	AT3G52180	Symbols: ATPTPKIS1, DSP4, SEX4 | SEX4 (STARCH-EXCESS 4); protein tyrosine/serine/threonine phosphatase | chr3:19361552-19364437 REVERSE	1241.41	3874.51	3.12106	0.320404
Brapa_ESTC013475	AT2G29340	Symbols: | short-chain dehydrogenase/reductase (SDR) family protein | chr2:12604208-12606086 FORWARD	5125.87	15990.6	3.11959	0.320555
Brapa_ESTC045300	AT5G04080	Symbols: | similar to unknown protein [Oryza sativa (japonica cultivar-group)] (GB:BAD87214.1) | chr5:1104816-1105187 FORWARD	4410.92	13759.8	3.11949	0.320566
Brapa_ESTC019436	AT3G02250	Symbols: | similar to unknown protein [Arabidopsis thaliana] (TAIR:AT5G15740.1); similar to hypothetical protein [Cleome spinosa] (GB:ABD96934.1); similar to Os06g0284200 [Oryza sativa (japonica cultivar-group)] (GB:NP_001057398.1); similar to hypothetical protein [Cleome spinosa] (GB:ABD96844.1); contains InterPro domain Protein of unknown function DUF246, plant; (InterPro:IPR004348) | chr3:4241…	1333.14	4154.19	3.11609	0.320915
Brapa_ESTC010861	AT5G08400	Symbols: | similar to oxidoreductase/ transition metal ion binding [Arabidopsis thaliana] (TAIR:AT4G29400.1); similar to unknown protein [Oryza sativa (japonica cultivar-group)] (GB:BAD23058.1); similar to Os02g0827600 [Oryza sativa (japonica cultivar-group)] (GB:NP_001048595.1) | chr5:2707226-2708912 REVERSE	1044.29	3251.32	3.11343	0.32119
Brapa_ESTC022218	AT4G22920	Symbols: | Similar to the tomato senescence-inducible chloroplast stay-green protein 1. It is upregulated during maximal senescence in the Arabidopsis life cycle, especially in senescent leaves. | chr4:12016787-12017980 REVERSE	5089.99	15840.1	3.11201	0.321336
Brapa_ESTC002931	AT3G07700	| Symbols: | ABC1 family protein | chr3:2459702-2463247 REVERSE	820.147	2551.28	3.11076	0.321465
Brapa_ESTC040451	AT1G69530	Symbols: EXP1, AT-EXP1, ATEXP1, ATHEXP ALPHA 1.2, ATEXPA1 | ATEXPA1 (ARABIDOPSIS THALIANA EXPANSIN A1) | chr1:26145697-26146714 FORWARD	597.464	1857.55	3.10906	0.321641
Brapa_ESTC038829	AT5G44560	| Symbols: | SNF7 family protein | chr5:17963308-17965449 FORWARD	917.085	2851.16	3.10894	0.321653
Brapa_ESTC035864	AT1G48660	Symbols: | auxin-responsive GH3 family protein | chr1:17999616-18001640 REVERSE	478.916	1488.68	3.10844	0.321705
Brapa_ESTC001514	AT4G29410	Symbols: | 60S ribosomal protein L28 (RPL28C) | chr4:14468445-14469970 REVERSE	1658.09	5152.95	3.10776	0.321775
Brapa_ESTC022803	AT2G29320	Symbols: | tropinone reductase, putative / tropine dehydrogenase, putative | chr2:12599257-12600454 FORWARD	2640.38	8205.6	3.10773	0.321778
Brapa_ESTC014642	AT1G30260	Symbols: AGL79 | AGL79 (AGAMOUS-LIKE 79) | chr1:10651143-10651436 FORWARD	1431.89	4449.52	3.10745	0.321808
Brapa_ESTC011673	AT2G47760	| Symbols: | catalytic | chr2:19573003-19575291 REVERSE	524.713	1629.86	3.10619	0.321937
Brapa_ESTC008450	AT2G15090	Symbols: | fatty acid elongase, putative | chr2:6549418-6550863 FORWARD	740.601	2299.43	3.10482	0.32208
Brapa_ESTC000010	AT2G29340	Symbols: | short-chain dehydrogenase/reductase (SDR) family protein | chr2:12604208-12606086 FORWARD	2511.27	7795.33	3.10414	0.322151
Brapa_ESTC045164	AT4G39150	Symbols: | DNAJ heat shock N-terminal domain-containing protein | chr4:18233645-18235734 REVERSE	1681.86	5220.34	3.10391	0.322174
Brapa_ESTC051314	no_hits_f	---------	1687.93	5239.09	3.10386	0.32218
Brapa_ESTC046639	AT5G62880	Symbols: ARAC10, ATRAC10, AtROP11 | ARAC10/ATRAC10/AtROP11 (rho-related protein from plants 11); GTP binding | chr5:25254462-25256165 FORWARD	853.901	2650.07	3.10349	0.322218
Brapa_ESTC002588	AT1G06500	| Symbols: | unknown protein | chr1:1990175-1990585 FORWARD	582.442	1807.12	3.10266	0.322304
Brapa_ESTC016042	AT3G29320	Symbols: | glucan phosphorylase, putative | chr3:11254108-11258824 FORWARD	1143.94	3549.12	3.10254	0.322317
Brapa_ESTC011399	AT1G08380	Symbols: PSAO | PSAO (photosystem I subunit O) | chr1:2641001-2641736 REVERSE	6846.78	21229.7	3.10068	0.32251
Brapa_ESTC037005	AT4G37800	Symbols: | xyloglucan:xyloglucosyl transferase, putative / xyloglucan endotransglycosylase, putative / endo-xyloglucan transferase, putative | chr4:17775697-17777366 REVERSE	7235.46	22426.9	3.09958	0.322624
Brapa_ESTC035091	AT3G57600	Symbols: | AP2 domain-containing transcription factor, putative | chr3:21343818-21344651 FORWARD	455.193	1410.83	3.09941	0.322642
Brapa_ESTC014260	AT5G27620	Symbols: CYCH;1 | CYCH;1 (CYCLIN H;1); cyclin-dependent protein kinase/ protein binding / protein kinase | chr5:9771765-9774687 FORWARD	1087.33	3369.81	3.09916	0.322668
Brapa_ESTC013488	AT3G25530	Symbols: GHBDH, ATGHBDH | 6-phosphogluconate dehydrogenase NAD-binding domain-containing protein | chr3:9273186-9274751 REVERSE	430.166	1333.02	3.09885	0.3227
Brapa_ESTC051727	no_hits_f	---------	2570.59	7964.63	3.09837	0.322751
Brapa_ESTC048811	no_hits_f	---------	1968.06	6096.96	3.09795	0.322794
Brapa_ESTC024104	AT3G28480	Symbols: | oxidoreductase, 2OG-Fe(II) oxygenase family protein | chr3:10677503-10679499 REVERSE	3634.57	11252.7	3.09602	0.322995
Brapa_ESTC048212	no_hits_f	---------	774.068	2396.06	3.09541	0.323059
Brapa_ESTC028572	AT5G19680	Symbols: | leucine-rich repeat family protein | chr5:6649665-6651566 FORWARD	3737.17	11562.7	3.09397	0.323209
Brapa_ESTC013564	AT2G35660	Symbols: CTF2A | CTF2A; monooxygenase | chr2:14995578-14997399 FORWARD	4966.17	15362.1	3.09335	0.323274
Brapa_ESTC018480	AT1G06820	Symbols: CCR2, CRTISO | CRTISO (carotenoid isomerase); carotenoid isomerase | chr1:2093144-2096219 REVERSE	2844.9	8799.75	3.09317	0.323293
Brapa_ESTC017877	AT2G23150	Symbols: ATNRAMP3, NRAMP3 | NRAMP3 (NRAMP metal ion transporter 3); manganese ion transporter/ metal ion transporter | chr2:9863502-9865645 REVERSE	656.504	2029.88	3.09195	0.32342
Brapa_ESTC042372	AT2G15220	Symbols: | secretory protein, putative | chr2:6615771-6616448 FORWARD	1128.67	3488.25	3.09058	0.323563
Brapa_ESTC027410	AT2G03840	Symbols: TET13 | TET13 (TETRASPANIN13) | chr2:1173167-1174112 FORWARD	516.712	1595.97	3.0887	0.32376
Brapa_ESTC038376	no_hits_f	---------	1965.45	6069.6	3.08815	0.323819
Brapa_ESTC028682	AT4G22140	| Symbols: | DNA binding | chr4:11728105-11730242 REVERSE	2766.01	8532.69	3.08484	0.324166
Brapa_ESTC038806	AT5G44450	Symbols: | similar to unknown protein [Oryza sativa (japonica cultivar-group)] (GB:AAK09232.1); contains InterPro domain SAM (and some other nucleotide) binding motif; (InterPro:IPR000051); contains InterPro domain Generic methyltransferase; (InterPro:IPR001601); contains InterPro domain Protein of unknown function DUF858, methyltransferase-like; (InterPro:IPR008576) | chr5:17931587-17933244 REVE…	1198.58	3693.9	3.0819	0.324475
Brapa_ESTC011530	AT3G15140	Symbols: | exonuclease family protein | chr3:5099719-5101724 REVERSE	4913.62	15138.4	3.08091	0.32458
Brapa_ESTC026403	AT4G14890	Symbols: | ferredoxin family protein | chr4:8520882-8521346 FORWARD	2252.12	6937.01	3.08021	0.324653
Brapa_ESTC037161	no_hits_f	---------	446.091	1373.82	3.07969	0.324708
Brapa_ESTC038737	AT2G40116	Symbols: | phosphoinositide-specific phospholipase C family protein | chr2:16758860-16761389 FORWARD	337.122	1038.18	3.07954	0.324724
Brapa_ESTC022515	AT5G17400	Symbols: | ADP, ATP carrier protein, mitochondrial, putative / ADP/ATP translocase, putative / adenine nucleotide translocator, putative | chr5:5729017-5730106 REVERSE	535.889	1649.5	3.07806	0.32488
Brapa_ESTC023465	AT5G02540	Symbols: | short-chain dehydrogenase/reductase (SDR) family protein | chr5:568607-570718 FORWARD	1005.95	3094.93	3.07662	0.325032
Brapa_ESTC034999	AT1G16040	Symbols: | similar to phosphatidylinositol glycan synthesis class F protein [Oryza sativa (japonica cultivar-group)] (GB:ABH07430.1); similar to Os03g0129000 [Oryza sativa (japonica cultivar-group)] (GB:NP_001048844.1); contains InterPro domain Phospho-ethanolamine N-methyltransferase; (InterPro:IPR009580) | chr1:5504741-5506450 FORWARD	742.299	2283.57	3.07635	0.325061
Brapa_ESTC050021	AT1G16280	Symbols: | DEAD/DEAH box helicase, putative | chr1:5568476-5570481 REVERSE	1858.9	5718.27	3.07616	0.325081
Brapa_ESTC043325	AT3G26115	Symbols: | similar to D-CDES (D-CYSTEINE DESULFHYDRASE), 1-aminocyclopropane-1-carboxylate deaminase/ D-cysteine desulfhydrase/ catalytic [Arabidopsis thaliana] (TAIR:AT1G48420.1); similar to hypothetical protein [Oryza sativa (japonica cultivar-group)] (GB:BAD81811.1); contains domain Tryptophan synthase beta subunit-like PLP-dependent enzymes (SSF53686); contains domain TRYTOPHAN SYNTHASE ALPHA…	723.275	2221.42	3.07134	0.325591
Brapa_ESTC017709	AT5G62430	Symbols: CDF1 | CDF1 (CYCLING DOF FACTOR 1); DNA binding / protein binding / transcription factor | chr5:25086524-25088013 REVERSE	3447.8	10587.8	3.07089	0.325639
Brapa_ESTC012331	AT4G10330	| Symbols: | glycine-rich protein | chr4:6406547-6407132 FORWARD	1754.47	5386.96	3.07042	0.325688
Brapa_ESTC008719	AT5G41180	Symbols: | leucine-rich repeat protein kinase, putative | chr5:16501273-16504456 FORWARD	1685.56	5174.52	3.06991	0.325742
Brapa_ESTC008888	AT5G28640	Symbols: GIF, GIF1, AN3 | AN3 (ANGUSITFOLIA3) | chr5:10647835-10649624 REVERSE	891.76	2736.27	3.06839	0.325904
Brapa_ESTC030879	AT4G02610	Symbols: | tryptophan synthase, alpha subunit, putative | chr4:1147662-1149217 FORWARD	1144.25	3508.36	3.06608	0.32615
Brapa_ESTC014969	AT2G31380	Symbols: STH | STH (salt tolerance homologue); transcription factor/ zinc ion binding | chr2:13389227-13390379 FORWARD	11857.2	36350.3	3.06567	0.326193
Brapa_ESTC009730	AT5G62430	Symbols: CDF1 | CDF1 (CYCLING DOF FACTOR 1); DNA binding / protein binding / transcription factor | chr5:25086524-25088013 REVERSE	1726.35	5292.27	3.06558	0.326202
Brapa_ESTC045816	no_hits_f	---------	419.524	1284.48	3.06176	0.32661
Brapa_ESTC002755	AT4G19100	Symbols: | similar to unknown protein [Arabidopsis thaliana] (TAIR:AT5G52780.1); similar to hypothetical protein [Oryza sativa (japonica cultivar-group)] (GB:BAD61615.1) | chr4:10453464-10454370 FORWARD	7334.4	22451.6	3.06114	0.326676
Brapa_ESTC044857	AT4G33440	Symbols: | glycoside hydrolase family 28 protein / polygalacturonase (pectinase) family protein | chr4:16092023-16094735 FORWARD	811.31	2483.3	3.06085	0.326706
Brapa_ESTC012514	AT4G25570	Symbols: ACYB-2 | ACYB-2 (Arabidopsis cytochrome b561 -2); carbon-monoxide oxygenase | chr4:13053896-13055527 REVERSE	2799.22	8567.69	3.06074	0.326718
Brapa_ESTC011572	AT3G25560	Symbols: NIK2 | NIK2 (NSP-INTERACTING KINASE 2); protein kinase | chr3:9280919-9283797 REVERSE	429.073	1313.12	3.06037	0.326758
Brapa_ESTC039796	AT1G20190	Symbols: EXP11, ATEXP11, ATHEXP ALPHA 1.14, ATEXPA11 | ATEXPA11 (ARABIDOPSIS THALIANA EXPANSIN A11) | chr1:6998753-6999701 REVERSE	1074.58	3288.41	3.06018	0.326778
Brapa_ESTC015443	AT1G03600	Symbols: | photosystem II family protein | chr1:898915-899439 FORWARD	2813.16	8606.19	3.05926	0.326876
Brapa_ESTC029811	no_hits_f	---------	856.387	2619.63	3.05893	0.326911
Brapa_ESTC028087	AT2G11910	Symbols: | similar to zinc finger protein-related [Arabidopsis thaliana] (TAIR:AT5G63740.1); similar to conserved hypothetical protein [Medicago truncatula] (GB:ABE93307.1) | chr2:4812944-4814246 REVERSE	3508.47	10722.5	3.05618	0.327206
Brapa_ESTC006081	AT1G12240	Symbols: ATBETAFRUCT4, VAC-INV | ATBETAFRUCT4/VAC-INV (VACUOLAR INVERTASE); beta-fructofuranosidase/ hydrolase, hydrolyzing O-glycosyl compounds | chr1:4153697-4157455 FORWARD	2047.67	6256.88	3.05561	0.327267
Brapa_ESTC044751	AT4G31380	Symbols: FLP1 | FLP1 (FPF1-LIKE PROTEIN 1) | chr4:15229843-15230388 FORWARD	1819.3	5558.9	3.05552	0.327277
Brapa_ESTC028166	AT4G10080	Symbols: | similar to unknown protein [Arabidopsis thaliana] (TAIR:AT4G13530.1); similar to unknown protein [Oryza sativa (japonica cultivar-group)] (GB:BAD82228.1); similar to Os02g0558500 [Oryza sativa (japonica cultivar-group)] (GB:NP_001047145.1) | chr4:6300450-6302556 REVERSE	2151.79	6568.25	3.05246	0.327605
Brapa_ESTC046541	no_hits_f	---------	456.306	1392.84	3.05243	0.327608
Brapa_ESTC015825	AT1G05530	Symbols: UGT75B2, UGT2 | UGT2/UGT75B2 (UDP-glucosyl transferase 75B2); UDP-glucosyltransferase/ UDP-glycosyltransferase/ abscisic acid glucosyltransferase/ transferase, transferring glycosyl groups | chr1:1636495-1637862 REVERSE	804.911	2452.46	3.04687	0.328206
Brapa_ESTC036934	AT1G07700	Symbols: | thioredoxin family protein | chr1:2380294-2381124 FORWARD	875.349	2666.26	3.04594	0.328306
Brapa_ESTC048670	no_hits_f	---------	2820.52	8588.47	3.045	0.328408
Brapa_ESTC043064	AT4G21380	Symbols: ARK3 | ARK3 (Arabidopsis Receptor Kinase 3); kinase | chr4:11389230-11393101 REVERSE	400.588	1219.45	3.04415	0.328499
Brapa_ESTC050017	no_hits_f	---------	1623.26	4940.79	3.04375	0.328543
Brapa_ESTC025025	AT1G10940	Symbols: ASK1, SNRK2-4, SNRK2.4, SRK2A | ASK1 (ARABIDOPSIS SERINE/THREONINE KINASE 1); kinase | chr1:3656050-3658170 REVERSE	1024.96	3119.6	3.04363	0.328555
Brapa_ESTC027146	AT4G22165	| Symbols: | F-box family protein | chr4:11734340-11735431 FORWARD	357.918	1089.29	3.04341	0.328579
Brapa_ESTC014010	AT5G59540	| Symbols: | oxidoreductase | chr5:24013841-24014802 REVERSE	1676.43	5100.83	3.04267	0.328658
Brapa_ESTC004834	AT5G35630	Symbols: GLN2, ATGSL1, GS2 | GS2 (GLUTAMINE SYNTHETASE 2) | chr5:13848450-13850469 FORWARD	2704.21	8226.1	3.04196	0.328735
Brapa_ESTC032275	AT3G22420	Symbols: ZIK3, WNK2 | WNK2 (WITH NO K 2); kinase | chr3:7946659-7948965 FORWARD	948.825	2886.12	3.04178	0.328755
Brapa_ESTC045668	AT5G14000	Symbols: ANAC084 | ANAC084 (Arabidopsis NAC domain containing protein 84); transcription factor | chr5:4518179-4519036 FORWARD	2351.04	7149.09	3.04082	0.328859
Brapa_ESTC050057	no_hits_f	---------	2255.6	6858.81	3.04079	0.328862
Brapa_ESTC030236	AT5G23770	Symbols: | agenet domain-containing protein | chr5:8014516-8016274 REVERSE	2742.36	8338.41	3.0406	0.328883
Brapa_ESTC035654	AT4G21510	| Symbols: | F-box family protein | chr4:11446205-11447037 REVERSE	1960.03	5958.76	3.04014	0.328933
Brapa_ESTC015799	AT2G28070	Symbols: | ABC transporter family protein | chr2:11963509-11966859 FORWARD	407.54	1237.67	3.03693	0.32928
Brapa_ESTC036898	no_hits_f	---------	1771.31	5379.13	3.03681	0.329293
Brapa_ESTC021667	AT3G61750	Symbols: | auxin-responsive protein -related | chr3:22868872-22870229 REVERSE	1513.22	4595.1	3.03664	0.329312
Brapa_ESTC020735	AT4G35920	Symbols: MCA1 | similar to unknown protein [Arabidopsis thaliana] (TAIR:AT2G17780.1); similar to Unknown protein [Oryza sativa (japonica cultivar-group)] (GB:AAM51833.1); similar to Os03g0157300 [Oryza sativa (japonica cultivar-group)] (GB:NP_001049013.1); contains InterPro domain Protein of unknown function Cys-rich; (InterPro:IPR006461) | chr4:17012109-17014195 REVERSE	633.472	1923.17	3.03592	0.329389
Brapa_ESTC031510	AT5G49030	Symbols: OVA2 | OVA2 (OVULE ABORTION 2); ATP binding / aminoacyl-tRNA ligase | chr5:19892317-19899517 REVERSE	1073.13	3257.42	3.03544	0.329442
Brapa_ESTC048344	no_hits_f	---------	901.214	2734.5	3.03424	0.329572
Brapa_ESTC017789	AT5G11010	Symbols: | pre-mRNA cleavage complex-related | chr5:3484177-3486068 FORWARD	555.385	1684.81	3.03359	0.329643
Brapa_ESTC006891	AT3G29320	Symbols: | glucan phosphorylase, putative | chr3:11254108-11258824 FORWARD	1593.87	4834.07	3.03291	0.329716
Brapa_ESTC028618	no_hits_f	---------	527.018	1596.32	3.02897	0.330146
Brapa_ESTC011215	AT5G39940	| Symbols: | oxidoreductase | chr5:16004877-16007789 FORWARD	882.089	2671.77	3.02891	0.330152
Brapa_ESTC026815	AT4G24460	Symbols: | similar to unknown protein [Arabidopsis thaliana] (TAIR:AT5G19380.1); similar to conserved hypothetical protein [Medicago truncatula] (GB:ABE77682.1); similar to Os12g0511300 [Oryza sativa (japonica cultivar-group)] (GB:NP_001066868.1) | chr4:12642898-12645320 FORWARD	562.445	1703.51	3.02876	0.330168
Brapa_ESTC010792	AT2G24060	Symbols: | translation initiation factor 3 (IF-3) family protein | chr2:10236533-10238470 FORWARD	580.624	1758.22	3.02816	0.330234
Brapa_ESTC027423	AT5G65410	Symbols: ATHB25, ZFHD2 | ATHB25/ZFHD2 (ZINC FINGER HOMEODOMAIN 2); DNA binding / transcription factor | chr5:26153405-26154244 FORWARD	1057.96	3202.91	3.02744	0.330312
Brapa_ESTC023943	AT5G18600	Symbols: | glutaredoxin family protein | chr5:6183468-6183776 REVERSE	1676.88	5073.58	3.02561	0.330512
Brapa_ESTC026632	AT5G27830	Symbols: | similar to hypothetical protein MtrDRAFT_AC136288g4v1 [Medicago truncatula] (GB:ABE80618.1); contains domain Frizzled cystein-rich domain (SSF63501) | chr5:9861356-9862746 FORWARD	2578.04	7800	3.02555	0.330518
Brapa_ESTC039136	AT4G35180	Symbols: LHT7 | LHT7 (LYS/HIS TRANSPORTER 7); amino acid permease | chr4:16738522-16740390 REVERSE	450.526	1362.16	3.02349	0.330744
Brapa_ESTC012037	AT1G14270	Symbols: | CAAX amino terminal protease family protein | chr1:4875094-4877190 REVERSE	1268.77	3835.62	3.0231	0.330786
Brapa_ESTC027255	AT2G01910	| Symbols: ATMAP65-6 | ATMAP65-6 | chr2:417697-420181 FORWARD	2420.49	7316.91	3.0229	0.330808
Brapa_ESTC003436	AT4G23930	Symbols: | similar to proline-rich family protein [Arabidopsis thaliana] (TAIR:AT1G64450.1); similar to Harpin-induced 1 [Medicago truncatula] (GB:ABE94038.1); contains InterPro domain Harpin-induced 1; (InterPro:IPR010847) | chr4:12436141-12436704 REVERSE	1767.05	5339.17	3.02152	0.33096
Brapa_ESTC031835	no_hits_f	---------	420.333	1269.6	3.02046	0.331075
Brapa_ESTC016466	AT5G64860	Symbols: DPE1 | DPE1 (DISPROPORTIONATING ENZYME); 4-alpha-glucanotransferase | chr5:25942599-25946014 REVERSE	992.476	2997.27	3.01999	0.331127
Brapa_ESTC045270	no_hits_f	---------	777.074	2346.62	3.01982	0.331146
Brapa_ESTC003388	AT2G43710	Symbols: FAB2, SSI2 | SSI2 (fatty acid biosynthesis 2); acyl-[acyl-carrier-protein] desaturase | chr2:18127184-18129572 FORWARD	8046.69	24293.2	3.01903	0.331232
Brapa_ESTC009467	AT3G48090	Symbols: EDS1 | EDS1 (ENHANCED DISEASE SUSCEPTIBILITY 1); signal transducer/ triacylglycerol lipase | chr3:17766538-17768277 REVERSE	3997.68	12068.7	3.01893	0.331244
Brapa_ESTC047249	AT2G37660	Symbols: | catalytic/ coenzyme binding | chr2:15802559-15804055 REVERSE	9625.68	29054	3.01838	0.331303
Brapa_ESTC042767	AT3G07990	Symbols: SCPL27 | SCPL27 (serine carboxypeptidase-like 27); serine carboxypeptidase | chr3:2552550-2554650 FORWARD	1214.47	3664.98	3.01776	0.331372
Brapa_ESTC030300	AT2G01910	Symbols: ATMAP65-6 | ATMAP65-6; microtubule binding | chr2:417190-420181 FORWARD	2958.19	8926.91	3.01769	0.331379
Brapa_ESTC006494	AT1G18540	Symbols: | 60S ribosomal protein L6 (RPL6A) | chr1:6377441-6378541 REVERSE	4472.47	13494.4	3.01721	0.331432
Brapa_ESTC008945	AT5G19390	Symbols: | pleckstrin homology (PH) domain-containing protein / RhoGAP domain-containing protein | chr5:6531908-6537145 FORWARD	482.925	1456.96	3.01695	0.331461
Brapa_ESTC006920	AT3G51820	Symbols: ATG4, G4, CHLG | ATG4/CHLG/G4 (CHLOROPHYLL SYNTHASE); chlorophyll synthetase | chr3:19227278-19229911 REVERSE	2971.47	8964.15	3.01674	0.331484
Brapa_ESTC011379	AT5G59480	Symbols: | haloacid dehalogenase-like hydrolase family protein | chr5:23996845-23998382 REVERSE	4683.81	14127.1	3.01616	0.331548
Brapa_ESTC020803	AT1G07320	Symbols: RPL4 | RPL4 (ribosomal protein L4); structural constituent of ribosome | chr1:2249189-2250172 FORWARD	4789.88	14442.4	3.01519	0.331654
Brapa_ESTC012827	AT1G73630	Symbols: | calcium-binding protein, putative | chr1:27688409-27688900 FORWARD	601.044	1812.23	3.01514	0.33166
Brapa_ESTC020796	AT1G26630	Symbols: | eukaryotic translation initiation factor 5A, putative / eIF-5A, putative | chr1:9205955-9207000 FORWARD	620.288	1868.75	3.01271	0.331927
Brapa_ESTC048446	no_hits_f	---------	443.566	1335.43	3.01067	0.332152
Brapa_ESTC022793	AT1G29530	Symbols: | similar to unknown protein [Arabidopsis thaliana] (TAIR:AT2G34310.3); similar to expressed protein, putative [Medicago truncatula] (GB:ABE81136.1) | chr1:10325539-10326637 REVERSE	2205.88	6640.84	3.01052	0.332169
Brapa_ESTC006162	no_hits_f	---------	2093.4	6300.84	3.00986	0.332241
Brapa_ESTC045798	AT5G17620	Symbols: | similar to nuclear matrix protein 1 [Lycopersicon esculentum] (GB:AAK83083.1); contains InterPro domain Plant nuclear matrix 1; (InterPro:IPR010604) | chr5:5805936-5808457 REVERSE	2968.57	8934.34	3.00964	0.332265
Brapa_ESTC012701	AT2G29300	Symbols: | tropinone reductase, putative / tropine dehydrogenase, putative | chr2:12595291-12596449 FORWARD	4201.22	12643.6	3.00951	0.33228
Brapa_ESTC030003	AT1G67230	Symbols: | similar to unknown protein [Arabidopsis thaliana] (TAIR:AT1G68790.1); similar to nuclear matrix constituent protein-related [Arabidopsis thaliana] (TAIR:AT1G13220.2); similar to nuclear matrix constituent protein 1 (NMCP1) [Daucus carota] (GB:BAA20407.1); contains InterPro domain Spectrin repeat; (InterPro:IPR002017); contains InterPro domain tRNA-binding arm; (InterPro:IPR010978) | ch…	1508.65	4539.17	3.00876	0.332363
Brapa_ESTC041867	AT2G39080	Symbols: | similar to unnamed protein product [Ostreococcus tauri] (GB:CAL54696.1); similar to Os01g0367100 [Oryza sativa (japonica cultivar-group)] (GB:NP_001043040.1); contains domain NAD(P)-binding Rossmann-fold domains (SSF51735); contains domain no description (G3D.3.40.50.720) | chr2:16317059-16319553 REVERSE	5002.63	15051.5	3.00872	0.332368
Brapa_ESTC024896	AT2G24580	Symbols: | sarcosine oxidase family protein | chr2:10452007-10453257 REVERSE	991.035	2981.37	3.00834	0.332409
Brapa_ESTC042810	AT3G07550	Symbols: | F-box family protein (FBL12) | chr3:2409952-2411139 FORWARD	2505.2	7535.88	3.0081	0.332436
Brapa_ESTC038864	no_hits_f	---------	631.996	1900.89	3.00776	0.332474
Brapa_ESTC008680	AT2G29300	Symbols: | tropinone reductase, putative / tropine dehydrogenase, putative | chr2:12595291-12596449 FORWARD	10177.2	30601	3.00682	0.332577
Brapa_ESTC028889	AT1G70700	Symbols: | similar to unknown protein [Arabidopsis thaliana] (TAIR:AT1G48500.1); similar to hypothetical protein [Solanum tuberosum] (GB:BAE46411.1); contains InterPro domain ZIM; (InterPro:IPR010399) | chr1:26658614-26660466 FORWARD	5298.47	15927.4	3.00604	0.332664
Brapa_ESTC011242	AT5G67250	Symbols: VFB4, SKIP2 | SKIP2 (SKP1 INTERACTING PARTNER 2); ubiquitin-protein ligase | chr5:26848903-26850486 REVERSE	3262.71	9805.96	3.00546	0.332727
Brapa_ESTC004477	AT3G21270	Symbols: ADOF2 | ADOF2 (Arabidopsis dof zinc finger protein 2); DNA binding / transcription factor | chr3:7474940-7475554 FORWARD	1156.02	3473.41	3.00463	0.33282
Brapa_ESTC014395	AT1G74210	Symbols: | glycerophosphoryl diester phosphodiesterase family protein | chr1:27914057-27916446 FORWARD	386.805	1161.93	3.00392	0.332899
Brapa_ESTC036944	no_hits_f	---------	433.351	1300.7	3.00149	0.333168
Brapa_ESTC009511	AT1G07110	Symbols: ATF2KP, FKFBP, F2KP | F2KP (FRUCTOSE-2,6-BISPHOSPHATASE); fructose-2,6-bisphosphate 2-phosphatase | chr1:2178362-2183979 REVERSE	3001.61	9005.8	3.00032	0.333297
Brapa_ESTC006634	AT2G36360	Symbols: | kelch repeat-containing protein | chr2:15250540-15254602 REVERSE	500.663	1502.03	3.00008	0.333324
Brapa_ESTC031151	AT3G15190	Symbols: | chloroplast 30S ribosomal protein S20, putative | chr3:5116223-5117419 FORWARD	7358.14	22067.6	2.99907	0.333436
[truncated: 2,810 more rows]

## Sheet: Down
Table S2. Number of genes expressed over 2-fold in white inner leaves
B. rapa SEQ_ID	TAIR7_cds ID	Description, blastN	PI value		Fold Change
			White leaves	Yellow leaves	Y/W	W/Y
Brapa_ESTC048544	no_hits_f	---------	2635.45	27.159	0.0103053	97.0378
Brapa_ESTC002914	no_hits_f	---------	5441.39	62.5249	0.0114906	87.0276
Brapa_ESTC028228	no_hits_f	---------	1891.64	21.9709	0.0116147	86.0975
Brapa_ESTC024359	AT4G36010	Symbols: | pathogenesis-related thaumatin family protein | chr4:17039475-17040979 REVERSE	7666.52	125.928	0.0164257	60.8802
Brapa_ESTC006100	AT2G33380	Symbols: RD20 | RD20 (RESPONSIVE TO DESSICATION 20); calcium ion binding | chr2:14152060-14153450 REVERSE	3380.7	55.8581	0.0165226	60.523
Brapa_ESTC004379	AT1G76930	Symbols: ORG5, ATEXT1, ATEXT4 | ATEXT4 (EXTENSIN 4) | chr1:28900343-28901747 REVERSE	6169.21	103.653	0.0168017	59.5179
Brapa_ESTC005000	AT2G22860	Symbols: ATPSK2 | ATPSK2 (PHYTOSULFOKINE 2 PRECURSOR); growth factor | chr2:9744746-9745157 FORWARD	1669.54	28.3767	0.0169967	58.8349
Brapa_ESTC001296	AT4G12545	Symbols: | protease inhibitor/seed storage/lipid transfer protein (LTP) family protein | chr4:7434257-7434583 FORWARD	2140.13	48.7141	0.0227622	43.9325
Brapa_ESTC028190	AT4G37450	Symbols: ATAGP18, AGP18 | AGP18 (Arabinogalactan protein 18) | chr4:17605920-17606728 REVERSE	5264.27	122.464	0.0232632	42.9863
Brapa_ESTC012393	AT5G09570	Symbols: | similar to unknown protein [Arabidopsis thaliana] (TAIR:AT5G64400.1); similar to Os03g0685500 [Oryza sativa (japonica cultivar-group)] (GB:NP_001050926.1); similar to unknown [Hyacinthus orientalis] (GB:AAS21010.1); contains InterPro domain CHCH; (InterPro:IPR010625) | chr5:2970734-2971971 FORWARD	2425.35	67.4873	0.0278258	35.9379
Brapa_ESTC048270	no_hits_f	---------	20076.8	573.906	0.0285855	34.9827
Brapa_ESTC002528	AT5G20230	Symbols: BCB, ATBCB | ATBCB (ARABIDOPSIS BLUE-COPPER-BINDING PROTEIN); copper ion binding | chr5:6826628-6827410 FORWARD	2005.7	59.921	0.0298754	33.4724
Brapa_ESTC048543	no_hits_f	---------	1673.76	50.167	0.0299726	33.3638
Brapa_ESTC011096	AT4G05070	Symbols: | similar to wound induced protein-like [Vitis vinifera] (GB:AAO12870.1) | chr4:2593784-2594047 REVERSE	22060.7	751.955	0.0340857	29.3378
Brapa_ESTC047475	AT3G19390	Symbols: | cysteine proteinase, putative / thiol protease, putative | chr3:6723030-6724774 FORWARD	4945.56	170.707	0.0345172	28.971
Brapa_ESTC048773	no_hits_f	---------	9709.93	339.625	0.0349771	28.5902
Brapa_ESTC025376	AT1G78410	Symbols: | VQ motif-containing protein | chr1:29507621-29507947 FORWARD	1247.88	46.4395	0.0372147	26.8711
Brapa_ESTC045627	AT5G14470	| Symbols: | GHMP kinase-related | chr5:4663032-4664180 REVERSE	14710.5	558.513	0.037967	26.3387
Brapa_ESTC015242	AT1G02400	Symbols: ATGA2OX6, DTA1 | ATGA2OX6/DTA1 (GIBBERELLIN 2-OXIDASE 6); gibberellin 2-beta-dioxygenase | chr1:486964-489391 FORWARD	1200.1	46.0051	0.0383344	26.0862
Brapa_ESTC028154	no_hits_f	---------	4575.67	179.016	0.0391235	25.5601
Brapa_ESTC029475	no_hits_f	---------	4622.04	183.42	0.0396838	25.1992
Brapa_ESTC012056	AT4G39730	Symbols: | lipid-associated family protein | chr4:18432944-18433575 FORWARD	31703.6	1307.35	0.0412366	24.2503
Brapa_ESTC028145	AT3G22231	Symbols: PCC1 | PCC1 (PATHOGEN AND CIRCADIAN CONTROLLED 1) | chr3:7846087-7846570 REVERSE	1616.25	66.8521	0.0413625	24.1765
Brapa_ESTC049767	AT3G27560	Symbols: ATN, ATN1 | ATN1; kinase/ protein threonine/tyrosine kinase | chr3:10211834-10213744 REVERSE	3499.49	148.302	0.0423782	23.5971
Brapa_ESTC005595	AT1G01470	Symbols: LSR3, LEA14 | LEA14 (LATE EMBRYOGENESIS ABUNDANT 14) | chr1:172295-172826 REVERSE	6022.69	255.889	0.0424875	23.5363
Brapa_ESTC005069	AT1G21310	Symbols: RSH, ATEXT3 | ATEXT3 (EXTENSIN 3); structural constituent of cell wall | chr1:7453681-7454976 REVERSE	4778.89	210.067	0.0439573	22.7494
Brapa_ESTC049132	no_hits_f	---------	7337.93	324.405	0.0442093	22.6197
Brapa_ESTC047477	AT1G21310	Symbols: RSH, ATEXT3 | ATEXT3 (EXTENSIN 3); structural constituent of cell wall | chr1:7453681-7454976 REVERSE	12577.9	564.089	0.0448476	22.2977
Brapa_ESTC017304	AT1G22770	| Symbols: FB, GI | GI (GIGANTEA) | chr1:8062387-8067436 FORWARD	13127.3	589.176	0.0448817	22.2808
Brapa_ESTC028308	AT3G54810	Symbols: BME3-ZF, BME3 | BME3/BME3-ZF (BLUE MICROPLYLAR END3); transcription factor | chr3:20307935-20309214 FORWARD	13724.3	616.274	0.0449039	22.2698
Brapa_ESTC027915	AT2G18915	Symbols: ADO2, LKP2 | LKP2 (LOV KELCH PROTEIN 2); ubiquitin-protein ligase | chr2:8201874-8204337 REVERSE	5400.31	242.891	0.0449772	22.2335
Brapa_ESTC023119	AT3G26570	Symbols: PHT2;1, ORF02 | PHT2;1 (phosphate transporter 2;1) | chr3:9757653-9759650 FORWARD	15086.2	695.19	0.0460812	21.7008
Brapa_ESTC048666	no_hits_f	---------	1893.58	87.3374	0.0461229	21.6812
Brapa_ESTC003127	AT1G76930	Symbols: ORG5, ATEXT1, ATEXT4 | ATEXT4 (EXTENSIN 4) | chr1:28900343-28901747 REVERSE	2999.73	138.776	0.0462628	21.6156
Brapa_ESTC002695	AT1G80440	Symbols: | kelch repeat-containing F-box family protein | chr1:30246655-30247719 FORWARD	3434.51	160.939	0.0468594	21.3404
Brapa_ESTC002756	AT4G02380	Symbols: ATLEA5, SAG21 | SAG21 (SENESCENCE-ASSOCIATED GENE 21) | chr4:1046414-1046807 REVERSE	1207.62	58.5751	0.0485046	20.6166
Brapa_ESTC035780	no_hits_f	---------	13766.7	678.044	0.0492525	20.3035
Brapa_ESTC015347	AT1G12200	Symbols: | flavin-containing monooxygenase family protein / FMO family protein | chr1:4137625-4139833 FORWARD	6506.7	336.24	0.051676	19.3514
Brapa_ESTC004067	AT3G12580	Symbols: HSP70 | HSP70 (heat shock protein 70); ATP binding | chr3:3991494-3993696 REVERSE	5222.11	273.981	0.0524656	19.0601
Brapa_ESTC048823	no_hits_f	---------	2787.27	146.467	0.0525486	19.03
Brapa_ESTC048774	no_hits_f	---------	4531.27	240.225	0.0530149	18.8626
Brapa_ESTC002160	AT5G23290	Symbols: | c-myc binding protein, putative / prefoldin, putative | chr5:7846147-7847431 FORWARD	10396.9	553.089	0.0531975	18.7979
Brapa_ESTC005841	AT5G66250	| Symbols: | kinectin-related | chr5:26486276-26487602 FORWARD	2367.58	126.324	0.0533557	18.7421
Brapa_ESTC032631	no_hits_f	---------	6260.53	337.387	0.0538911	18.5559
Brapa_ESTC036168	AT3G51000	Symbols: | epoxide hydrolase, putative | chr3:18956239-18957480 REVERSE	1931.88	104.563	0.054125	18.4758
Brapa_ESTC004387	no_hits_f	---------	6085.48	331.136	0.0544141	18.3776
Brapa_ESTC002787	AT1G21310	Symbols: RSH, ATEXT3 | ATEXT3 (EXTENSIN 3); structural constituent of cell wall | chr1:7453681-7454976 REVERSE	11099.7	607.752	0.0547539	18.2635
Brapa_ESTC013598	AT5G11630	Symbols: | similar to unknown protein [Arabidopsis thaliana] (TAIR:AT4G17310.1); similar to conserved hypothetical protein [Medicago truncatula] (GB:ABE78369.1) | chr5:3740546-3740910 FORWARD	1787.93	97.8978	0.0547548	18.2632
Brapa_ESTC003155	AT1G76650	Symbols: | calcium-binding EF hand family protein | chr1:28771803-28772336 REVERSE	11901.9	664.853	0.0558611	17.9016
Brapa_ESTC048923	no_hits_f	---------	19502.6	1105.91	0.0567058	17.6349
Brapa_ESTC035678	AT4G15390	Symbols: | transferase family protein | chr4:8792941-8794281 REVERSE	3155.59	181.883	0.0576383	17.3496
Brapa_ESTC047280	AT3G22231	Symbols: PCC1 | PCC1 (PATHOGEN AND CIRCADIAN CONTROLLED 1) | chr3:7846087-7846570 REVERSE	9334.97	541.072	0.0579618	17.2527
Brapa_ESTC007301	AT3G30280	Symbols: | transferase family protein | chr3:11916845-11918176 FORWARD	4387.72	256.078	0.0583624	17.1343
Brapa_ESTC004788	AT1G76930	Symbols: ORG5, ATEXT1, ATEXT4 | ATEXT4 (EXTENSIN 4) | chr1:28900343-28901747 REVERSE	15992.8	934.029	0.0584031	17.1224
Brapa_ESTC029431	AT1G76930	Symbols: ORG5, ATEXT1, ATEXT4 | ATEXT4 (EXTENSIN 4) | chr1:28900343-28901747 REVERSE	6042.33	364.03	0.0602466	16.5984
Brapa_ESTC039985	AT1G22770	| Symbols: FB, GI | GI (GIGANTEA) | chr1:8062387-8067436 FORWARD	5882.49	356.328	0.0605743	16.5086
Brapa_ESTC001351	AT1G20620	Symbols: SEN2, CAT3 | CAT3 (CATALASE 3); catalase | chr1:7143132-7146183 FORWARD	1742.3	105.63	0.0606268	16.4944
Brapa_ESTC032329	AT4G03590	Symbols: | similar to unknown protein [Arabidopsis thaliana] (TAIR:AT4G03570.1); contains InterPro domain Arabidopsis thaliana cystatin-related protein; (InterPro:IPR006525) | chr4:1600778-1602948 REVERSE	3372.95	205.265	0.0608562	16.4322
Brapa_ESTC026318	AT4G19230	Symbols: CYP707A1 | CYP707A1 (cytochrome P450, family 707, subfamily A, polypeptide 1); oxygen binding | chr4:10521535-10523528 FORWARD	2414.56	147.268	0.0609917	16.3957
Brapa_ESTC003202	AT4G39090	Symbols: RD19A, EMB3005, RD19 | RD19 (RESPONSIVE TO DEHYDRATION 19); cysteine-type peptidase | chr4:18215820-18217320 REVERSE	1047.99	64.8002	0.0618328	16.1726
Brapa_ESTC004594	AT1G21310	Symbols: RSH, ATEXT3 | ATEXT3 (EXTENSIN 3); structural constituent of cell wall | chr1:7453681-7454976 REVERSE	12913.8	811.944	0.0628741	15.9048
Brapa_ESTC029996	AT1G67330	Symbols: | similar to unknown protein [Arabidopsis thaliana] (TAIR:AT1G27930.1); similar to hypothetical protein MA4_111B14.64 [Musa acuminata] (GB:ABF72010.1); contains InterPro domain Protein of unknown function DUF579, plant; (InterPro:IPR006514) | chr1:25217781-25218656 FORWARD	1724.43	109.88	0.0637196	15.6938
Brapa_ESTC001257	AT4G09030	Symbols: ATAGP10, AGP10 | AGP10 (Arabinogalactan protein 10) | chr4:5792246-5792629 FORWARD	6475.25	417.348	0.0644528	15.5152
Brapa_ESTC013027	AT5G06720	| Symbols: | peroxidase, putative | chr5:2077568-2078858 REVERSE	32387.6	2103.58	0.0649502	15.3964
Brapa_ESTC048106	no_hits_f	---------	11207.2	729.764	0.0651156	15.3573
Brapa_ESTC040576	AT1G76650	Symbols: | calcium-binding EF hand family protein | chr1:28771803-28772336 REVERSE	11302.4	749.911	0.0663497	15.0717
Brapa_ESTC042064	AT2G38280	Symbols: ATAMPD, FAC1 | FAC1 (EMBRYONIC FACTOR1); AMP deaminase | chr2:16040845-16045871 REVERSE	1346.41	89.7047	0.0666251	15.0094
Brapa_ESTC006027	AT1G20620	Symbols: SEN2, CAT3 | CAT3 (CATALASE 3); catalase | chr1:7143132-7146183 FORWARD	1436.35	96.3857	0.0671046	14.9021
Brapa_ESTC029555	AT1G19770	Symbols: ATPUP14 | ATPUP14 (Arabidopsis thaliana purine permease 14); purine transporter | chr1:6832417-6833693 FORWARD	3221.57	216.491	0.0672005	14.8808
Brapa_ESTC001166	AT2G30490	Symbols: ATC4H, C4H, CYP73A5 | ATC4H (CINNAMATE-4-HYDROXYLASE) | chr2:13000938-13002760 REVERSE	4307.93	291.471	0.0676592	14.78
Brapa_ESTC006870	AT4G02330	Symbols: | pectinesterase family protein | chr4:1032479-1034928 FORWARD	22324.7	1523.63	0.0682486	14.6523
Brapa_ESTC010923	no_hits_f	---------	35051.8	2405.09	0.0686153	14.574
Brapa_ESTC006260	AT4G18210	Symbols: ATPUP10 | ATPUP10 (Arabidopsis thaliana purine permease 10); purine transporter | chr4:10076186-10077506 FORWARD	1509.43	105.707	0.0700311	14.2794
Brapa_ESTC023011	no_hits_f	---------	13682.2	972.219	0.0710572	14.0732
Brapa_ESTC024831	AT5G49520	Symbols: ATWRKY48, WRKY48 | WRKY48 (WRKY DNA-binding protein 48); transcription factor | chr5:20108116-20110093 FORWARD	5891.12	420.184	0.071325	14.0203
Brapa_ESTC035768	no_hits_f	---------	3172.01	226.602	0.071438	13.9982
Brapa_ESTC048992	no_hits_f	---------	18008.5	1289.55	0.0716079	13.9649
Brapa_ESTC048269	no_hits_f	---------	7462.38	534.642	0.071645	13.9577
Brapa_ESTC023576	AT3G16860	Symbols: COBL8 | phytochelatin synthetase-related | chr3:5759649-5762110 REVERSE	8172.71	593.472	0.0726163	13.771
Brapa_ESTC018709	AT5G23010	Symbols: IMS3, MAM1 | MAM1 (2-isopropylmalate synthase 3); 2-isopropylmalate synthase | chr5:7703176-7706772 FORWARD	2450.3	178.812	0.0729756	13.7032
Brapa_ESTC014892	AT2G28110	Symbols: FRA8 | FRA8 (FRAGILE FIBER8); transferase | chr2:11985101-11986718 REVERSE	1793.02	131.313	0.0732357	13.6546
Brapa_ESTC036728	AT1G54150	Symbols: | zinc finger (C3HC4-type RING finger) family protein | chr1:20219147-20220970 FORWARD	6335.36	464.656	0.0733433	13.6345
Brapa_ESTC005001	AT3G51660	Symbols: | macrophage migration inhibitory factor family protein / MIF family protein | chr3:19175208-19176055 REVERSE	1950.07	144.021	0.0738543	13.5402
Brapa_ESTC019232	AT5G63370	Symbols: | protein kinase family protein | chr5:25402180-25404018 REVERSE	1801.39	133.523	0.0741222	13.4912
Brapa_ESTC007230	AT4G02330	Symbols: | pectinesterase family protein | chr4:1032479-1034928 FORWARD	15818.6	1177.91	0.0744636	13.4294
Brapa_ESTC023114	AT5G10625	Symbols: | similar to FPF1 (FLOWERING PROMOTING FACTOR 1) [Arabidopsis thaliana] (TAIR:AT5G24860.1); similar to FPF1 protein [Sinapis alba] (GB:CAA72716.1); contains domain "Winged helix" DNA-binding domain (SSF46785) | chr5:3358935-3359273 FORWARD	6985.36	520.49	0.0745115	13.4207
Brapa_ESTC044176	AT4G18950	Symbols: | ankyrin protein kinase, putative | chr4:10375696-10378140 FORWARD	6050.32	455.558	0.0752949	13.2811
Brapa_ESTC012115	AT4G03510	Symbols: RMA1 | RMA1 (Ring finger protein with Membrane Anchor 1); protein binding / ubiquitin-protein ligase/ zinc ion binding | chr4:1557903-1558652 REVERSE	8881.68	670.256	0.075465	13.2512
Brapa_ESTC006781	AT4G13940	Symbols: EMB1395, MEE58, SAHH, SAHH1, HOG1 | HOG1 (HOMOLOGY-DEPENDENT GENE SILENCING 1) | chr4:8054926-8056758 FORWARD	3091.48	234.963	0.0760034	13.1573
Brapa_ESTC035499	AT3G55430	Symbols: | glycosyl hydrolase family 17 protein / beta-1,3-glucanase, putative | chr3:20560783-20562981 REVERSE	2142.27	163.096	0.0761323	13.135
Brapa_ESTC001429	AT5G23950	Symbols: | C2 domain-containing protein | chr5:8082792-8083451 FORWARD	5606.85	428.269	0.0763832	13.0919
Brapa_ESTC032076	AT5G09570	Symbols: | similar to unknown protein [Arabidopsis thaliana] (TAIR:AT5G64400.1); similar to Os03g0685500 [Oryza sativa (japonica cultivar-group)] (GB:NP_001050926.1); similar to unknown [Hyacinthus orientalis] (GB:AAS21010.1); contains InterPro domain CHCH; (InterPro:IPR010625) | chr5:2970734-2971971 FORWARD	8272.67	633.17	0.0765376	13.0655
Brapa_ESTC015564	AT1G12200	Symbols: | flavin-containing monooxygenase family protein / FMO family protein | chr1:4137625-4139833 FORWARD	3739.05	288.063	0.0770418	12.98
Brapa_ESTC028115	AT3G28500	Symbols: | 60S acidic ribosomal protein P2 (RPP2C) | chr3:10683441-10683788 FORWARD	9213.67	710.929	0.0771602	12.96
Brapa_ESTC029362	AT1G21310	Symbols: RSH, ATEXT3 | ATEXT3 (EXTENSIN 3); structural constituent of cell wall | chr1:7453681-7454976 REVERSE	25464.1	1985.77	0.0779831	12.8233
Brapa_ESTC004776	AT5G06860	Symbols: PGIP1 | PGIP1 (POLYGALACTURONASE INHIBITING PROTEIN 1); protein binding | chr5:2132374-2133435 FORWARD	14409	1134.4	0.0787286	12.7019
Brapa_ESTC050268	no_hits_f	---------	14283.8	1125.96	0.0788278	12.6859
Brapa_ESTC034737	no_hits_f	---------	26156.2	2063.36	0.0788861	12.6765
Brapa_ESTC027762	AT1G10550	Symbols: XET, XTH33 | XTH33 (xyloglucan:xyloglucosyl transferase 33); hydrolase, acting on glycosyl bonds | chr1:3479258-3480958 REVERSE	2822.04	222.829	0.0789603	12.6646
Brapa_ESTC002795	AT2G45750	Symbols: | dehydration-responsive family protein | chr2:18849729-18852417 FORWARD	4657.4	371.028	0.0796642	12.5527
Brapa_ESTC011786	AT1G77520	Symbols: | O-methyltransferase family 2 protein | chr1:29135451-29136901 FORWARD	2536.65	203.969	0.0804088	12.4364
Brapa_ESTC047983	AT5G06860	Symbols: PGIP1 | PGIP1 (POLYGALACTURONASE INHIBITING PROTEIN 1); protein binding | chr5:2132374-2133435 FORWARD	13611.8	1097.36	0.0806183	12.4041
Brapa_ESTC016802	AT4G32040	Symbols: KNAT5 | KNAT5 (KNOTTED1-LIKE HOMEOBOX GENE 5); transcription factor | chr4:15494133-15496015 FORWARD	7696.95	627.717	0.081554	12.2618
Brapa_ESTC028965	no_hits_f	---------	3547.24	290.963	0.0820252	12.1914
Brapa_ESTC025737	AT1G27200	Symbols: | similar to zinc finger (C3HC4-type RING finger) family protein [Arabidopsis thaliana] (TAIR:AT3G27330.1); similar to Os08g0121900 [Oryza sativa (japonica cultivar-group)] (GB:NP_001060883.1); similar to zinc finger (C3HC4-type RING finger) protein family-like [Oryza sativa (japonica cultivar-group)] (GB:BAD10590.1); contains InterPro domain Protein of unknown function DUF23; (InterPro:…	4099.9	336.311	0.0820291	12.1908
Brapa_ESTC024212	AT4G16563	Symbols: | aspartyl protease family protein | chr4:9329955-9331454 REVERSE	9716.51	803.771	0.0827222	12.0887
Brapa_ESTC013910	AT4G13770	Symbols: REF2, CYP83A1 | CYP83A1 (CYTOCHROME P450 83A1); oxygen binding | chr4:7990678-7992278 REVERSE	2749.79	230.018	0.0836493	11.9547
Brapa_ESTC024778	AT1G29690	Symbols: CAD1 | CAD1 (CONSTITUTIVELY ACTIVATED CELL DEATH 1); oxidoreductase | chr1:10379296-10381847 REVERSE	13200.2	1114.19	0.0844071	11.8474
Brapa_ESTC049783	AT5G25610	Symbols: RD22 | RD22 (RESPONSIVE TO DESSICATION 22) | chr5:8914501-8916687 REVERSE	19090.5	1614.58	0.0845751	11.8238
Brapa_ESTC028049	no_hits_f	---------	1877.44	159.067	0.0847255	11.8028
Brapa_ESTC006436	AT3G55430	Symbols: | glycosyl hydrolase family 17 protein / beta-1,3-glucanase, putative | chr3:20560783-20562981 REVERSE	1191.43	101.353	0.0850684	11.7553
Brapa_ESTC028247	AT4G30650	Symbols: | hydrophobic protein, putative / low temperature and salt responsive protein, putative | chr4:14954409-14954704 FORWARD	6103.54	535.075	0.0876663	11.4069
Brapa_ESTC048924	no_hits_f	---------	2513.25	220.671	0.087803	11.3891
Brapa_ESTC019569	AT4G15396	Symbols: CYP702A6 | CYP702A6 (cytochrome P450, family 702, subfamily A, polypeptide 6); heme binding / iron ion binding / monooxygenase | chr4:8807574-8810419 FORWARD	4973.05	439.641	0.0884047	11.3116
Brapa_ESTC006034	AT5G18270	| Symbols: ANAC087 | ANAC087 | chr5:6041243-6042745 REVERSE	3719.24	330.209	0.088784	11.2633
Brapa_ESTC000736	AT2G16700	Symbols: ADF5 | ADF5 (ACTIN DEPOLYMERIZING FACTOR 5); actin binding | chr2:7251799-7252549 FORWARD	2858.93	254.049	0.0888616	11.2535
Brapa_ESTC013349	AT2G39530	Symbols: | integral membrane protein, putative | chr2:16505737-16506479 REVERSE	17052.8	1517.38	0.0889813	11.2383
Brapa_ESTC005779	AT4G33920	Symbols: | protein phosphatase 2C family protein / PP2C family protein | chr4:16260881-16262708 FORWARD	3103.21	277.436	0.0894029	11.1853
Brapa_ESTC005503	AT3G59940	Symbols: | kelch repeat-containing F-box family protein | chr3:22153986-22155242 FORWARD	2750.2	246.832	0.0897506	11.142
Brapa_ESTC024467	AT4G31550	Symbols: ATWRKY11, WRKY11 | WRKY11 (WRKY DNA-binding protein 11); transcription factor | chr4:15290071-15291464 REVERSE	5082.1	457.136	0.0899502	11.1173
Brapa_ESTC002120	no_hits_f	---------	6558.29	591.263	0.0901551	11.092
Brapa_ESTC020807	AT2G38995	Symbols: | similar to unknown protein [Arabidopsis thaliana] (TAIR:AT5G37300.1); similar to Protein of unknown function DUF1298 [Medicago truncatula] (GB:ABE82755.1); contains InterPro domain Protein of unknown function UPF0089; (InterPro:IPR004255); contains InterPro domain Protein of unknown function DUF1298; (InterPro:IPR009721) | chr2:16289244-16291778 FORWARD	2126.17	191.877	0.0902454	11.0809
Brapa_ESTC010199	AT5G58710	Symbols: ROC7 | ROC7 (rotamase CyP 7); peptidyl-prolyl cis-trans isomerase | chr5:23735066-23736721 FORWARD	4787.5	437	0.0912794	10.9554
Brapa_ESTC038998	AT4G23340	Symbols: | oxidoreductase, 2OG-Fe(II) oxygenase family protein | chr4:12195729-12196662 REVERSE	3959.85	363.882	0.0918929	10.8822
Brapa_ESTC033074	AT4G10380	Symbols: NIP5;1, NLM6, NLM8 | NIP5;1/NLM6/NLM8 (NOD26-like intrinsic protein 5;1); boron transporter/ water channel | chr4:6431526-6434506 REVERSE	3604.19	331.834	0.092069	10.8614
Brapa_ESTC012973	AT1G15330	Symbols: | CBS domain-containing protein | chr1:5274363-5275494 FORWARD	1073.45	99.0374	0.0922608	10.8388
Brapa_ESTC006666	AT2G31360	Symbols: ADS2 | ADS2 (16:0DELTA9 ARABIDOPSIS DESATURASE 2); oxidoreductase | chr2:13379198-13380623 REVERSE	9886.37	914.464	0.0924974	10.8111
Brapa_ESTC002045	AT4G32480	Symbols: | similar to unknown protein [Arabidopsis thaliana] (TAIR:AT2G20670.1); similar to Protein of unknown function DUF506, plant [Medicago truncatula] (GB:ABD32359.1); contains InterPro domain Protein of unknown function DUF506, plant; (InterPro:IPR006502) | chr4:15676494-15677782 FORWARD	7832.16	727.723	0.0929147	10.7626
Brapa_ESTC019697	AT4G23340	Symbols: | oxidoreductase, 2OG-Fe(II) oxygenase family protein | chr4:12195729-12196662 REVERSE	1577.92	146.763	0.0930104	10.7515
Brapa_ESTC039104	AT5G49520	Symbols: ATWRKY48, WRKY48 | WRKY48 (WRKY DNA-binding protein 48); transcription factor | chr5:20108116-20110093 FORWARD	7206.7	673.194	0.0934122	10.7052
Brapa_ESTC018718	AT5G20830	Symbols: SUS1, ASUS1, ATSUS1 | SUS1 (SUCROSE SYNTHASE 1); UDP-glycosyltransferase/ sucrose synthase | chr5:7050601-7054034 REVERSE	17642	1656.66	0.0939043	10.6491
Brapa_ESTC009801	AT5G64750	Symbols: ABR1 | ABR1 (ABA REPRESSOR1); DNA binding / transcription factor | chr5:25908905-25910882 FORWARD	1260.16	118.435	0.0939841	10.6401
Brapa_ESTC046949	no_hits_f	---------	10829.6	1017.86	0.0939887	10.6396
Brapa_ESTC030997	AT2G28110	Symbols: FRA8 | FRA8 (FRAGILE FIBER8); transferase | chr2:11985101-11986718 REVERSE	1243.96	117.349	0.094335	10.6005
Brapa_ESTC008854	AT5G48560	Symbols: | basic helix-loop-helix (bHLH) family protein | chr5:19701386-19704097 FORWARD	2931.06	276.905	0.0944726	10.5851
Brapa_ESTC004611	AT5G17620	Symbols: | similar to nuclear matrix protein 1 [Lycopersicon esculentum] (GB:AAK83083.1); contains InterPro domain Plant nuclear matrix 1; (InterPro:IPR010604) | chr5:5805936-5808457 REVERSE	2233.16	211.245	0.0945947	10.5714
Brapa_ESTC010353	AT1G67850	Symbols: | similar to unknown protein [Arabidopsis thaliana] (TAIR:AT1G13000.2); similar to Protein of unknown function DUF707 [Medicago truncatula] (GB:ABE91787.1); contains InterPro domain Protein of unknown function DUF707; (InterPro:IPR007877) | chr1:25442867-25445567 FORWARD	4048.33	383.366	0.0946973	10.56
Brapa_ESTC012577	AT4G39680	Symbols: | SAP domain-containing protein | chr4:18414598-18416932 REVERSE	3430.38	330.931	0.0964707	10.3658
Brapa_ESTC017288	AT4G04340	Symbols: | early-responsive to dehydration protein-related / ERD protein-related | chr4:2123233-2126622 FORWARD	17117.4	1657.9	0.0968547	10.3247
Brapa_ESTC027898	AT4G01360	Symbols: | similar to BPS1 (BYPASS 1) [Arabidopsis thaliana] (TAIR:AT1G01550.2); similar to unknown [Solanum tuberosum] (GB:ABB16971.1) | chr4:565147-566193 FORWARD	1487.06	145.207	0.097647	10.241
Brapa_ESTC012118	AT3G15500	Symbols: ANAC055, ATNAC3 | ATNAC3 (ARABIDOPSIS NAC DOMAIN CONTAINING PROTEIN 55); transcription factor | chr3:5234738-5235889 FORWARD	5060.87	494.679	0.0977458	10.2306
Brapa_ESTC029523	no_hits_f	---------	8026.25	785.695	0.0978907	10.2155
Brapa_ESTC013007	AT4G18360	Symbols: | (S)-2-hydroxy-acid oxidase, peroxisomal, putative / glycolate oxidase, putative / short chain alpha-hydroxy acid oxidase, putative | chr4:10146638-10148397 REVERSE	30564.3	2992.57	0.0979106	10.2134
Brapa_ESTC024425	AT2G40340	Symbols: | AP2 domain-containing transcription factor, putative (DRE2B) | chr2:16855743-16857435 REVERSE	17837.7	1749.92	0.0981023	10.1934
Brapa_ESTC033767	no_hits_f	---------	13922.3	1366.86	0.0981777	10.1856
Brapa_ESTC047623	AT5G20830	Symbols: SUS1, ASUS1, ATSUS1 | SUS1 (SUCROSE SYNTHASE 1); UDP-glycosyltransferase/ sucrose synthase | chr5:7050601-7054034 REVERSE	14978.6	1475.82	0.0985286	10.1493
Brapa_ESTC023496	AT5G63190	Symbols: | MA3 domain-containing protein | chr5:25363371-25365789 FORWARD	5795.27	571.936	0.0986901	10.1327
Brapa_ESTC015203	AT5G63810	Symbols: BGAL10 | BGAL10 (beta-galactosidase 10); beta-galactosidase | chr5:25554468-25558541 FORWARD	1609.43	158.903	0.0987325	10.1284
Brapa_ESTC001631	AT1G12710	Symbols: ATPP2-A12 | ATPP2-A12 (Phloem protein 2-A12) | chr1:4326978-4328322 REVERSE	2132.97	211.027	0.0989358	10.1076
Brapa_ESTC022265	AT5G46330	Symbols: FLS2 | FLS2 (FLAGELLIN-SENSITIVE 2); ATP binding / kinase/ protein binding / protein serine/threonine kinase/ transmembrane receptor protein serine/threonine kinase | chr5:18809029-18812634 FORWARD	7454.45	738.13	0.0990187	10.0991
Brapa_ESTC015327	AT5G20830	Symbols: SUS1, ASUS1, ATSUS1 | SUS1 (SUCROSE SYNTHASE 1); UDP-glycosyltransferase/ sucrose synthase | chr5:7050601-7054034 REVERSE	10154.2	1008.77	0.0993451	10.0659
Brapa_ESTC008890	AT2G46830	Symbols: CCA1 | CCA1 (CIRCADIAN CLOCK ASSOCIATED 1); transcription factor | chr2:19253074-19255786 FORWARD	4510.43	448.74	0.0994894	10.0513
Brapa_ESTC003025	AT3G45140	Symbols: ATLOX2, LOX2 | LOX2 (LIPOXYGENASE 2) | chr3:16536422-16540218 FORWARD	1083.76	108.046	0.0996955	10.0305
Brapa_ESTC026207	AT3G03520	Symbols: | phosphoesterase family protein | chr3:837979-840518 REVERSE	1980	197.435	0.0997146	10.0286
Brapa_ESTC025098	AT2G25850	Symbols: | nucleotidyltransferase | chr2:11033126-11037518 REVERSE	3326.84	332.639	0.0999865	10.0014
Brapa_ESTC007362	AT2G45750	Symbols: | dehydration-responsive family protein | chr2:18849729-18852417 FORWARD	4847.75	485.969	0.100246	9.97543
Brapa_ESTC000592	AT3G17390	Symbols: SAMS3, MAT4, MTO3 | MTO3 (S-adenosylmethionine synthase 3); methionine adenosyltransferase | chr3:5952490-5953671 REVERSE	1889.9	189.516	0.100278	9.97225
Brapa_ESTC003452	AT3G52520	Symbols: | similar to unknown protein [Arabidopsis thaliana] (TAIR:AT5G06280.3) | chr3:19484461-19484862 FORWARD	1077.21	108.619	0.100834	9.91733
Brapa_ESTC006222	AT4G35970	Symbols: APX5 | APX5; L-ascorbate peroxidase/ peroxidase | chr4:17028654-17030208 FORWARD	4219.99	426.189	0.100993	9.90169
Brapa_ESTC001218	AT1G79470	Symbols: | inosine-5'-monophosphate dehydrogenase | chr1:29899665-29901554 REVERSE	1772.6	179.176	0.101081	9.89307
Brapa_ESTC025250	AT1G18580	Symbols: GAUT11 | GAUT11 (Galacturonosyltransferase 11); polygalacturonate 4-alpha-galacturonosyltransferase | chr1:6396137-6397383 FORWARD	4487.23	455.77	0.10157	9.84538
Brapa_ESTC001232	no_hits_f	---------	10973.2	1115.99	0.101701	9.8327
Brapa_ESTC003166	AT1G16840	Symbols: | similar to unknown protein [Arabidopsis thaliana] (TAIR:AT1G78890.1); similar to At1g16840/F17F16.27-related [Medicago truncatula] (GB:ABE84583.1) | chr1:5763104-5763977 REVERSE	14692.6	1496.12	0.101828	9.82047
Brapa_ESTC007046	no_hits_f	---------	4429.16	453.391	0.102365	9.76896
Brapa_ESTC001139	AT3G55430	Symbols: | glycosyl hydrolase family 17 protein / beta-1,3-glucanase, putative | chr3:20560783-20562981 REVERSE	1206.6	123.86	0.102652	9.74164
Brapa_ESTC020229	AT4G19230	Symbols: CYP707A1 | CYP707A1 (cytochrome P450, family 707, subfamily A, polypeptide 1); oxygen binding | chr4:10521535-10523577 FORWARD	4099.14	421.603	0.102852	9.72275
Brapa_ESTC044798	AT4G32340	| Symbols: | binding | chr4:15612747-15614225 REVERSE	1756.05	180.952	0.103045	9.70451
Brapa_ESTC011942	AT3G52400	Symbols: ATSYP122, SYP122 | SYP122 (syntaxin 122); t-SNARE | chr3:19436813-19438010 REVERSE	21447.3	2218.55	0.103442	9.66726
Brapa_ESTC015784	AT5G58620	Symbols: | zinc finger (CCCH-type) family protein | chr5:23711185-23713008 FORWARD	8076.34	836.976	0.103633	9.64943
Brapa_ESTC021642	AT5G42050	Symbols: | similar to unknown protein [Arabidopsis thaliana] (TAIR:AT3G27090.1); similar to N-rich protein [Glycine max] (GB:CAI44933.1); contains domain KELCH-RELATED PROTEINS (PTHR23230); contains domain no description (SM00767); contains domain gb def: Hypothetical protein At5g42050 (PTHR23230:SF16) | chr5:16832858-16834160 FORWARD	14585.7	1524.34	0.104509	9.56853
Brapa_ESTC012727	AT1G15750	Symbols: WSIP1, TPL | TPL/WSIP1 (WUS-INTERACTING PROTEIN 1) | chr1:5415081-5420354 REVERSE	13699.8	1433.63	0.104646	9.55602
Brapa_ESTC023799	AT2G30250	Symbols: ATWRKY25, WRKY25 | WRKY25 (WRKY DNA-binding protein 25); transcription factor | chr2:12910630-12912166 REVERSE	3144.34	330.315	0.105051	9.51922
Brapa_ESTC024986	AT1G26270	Symbols: | phosphatidylinositol 3- and 4-kinase family protein | chr1:9089809-9091701 REVERSE	5674.72	596.822	0.105172	9.50823
Brapa_ESTC002084	AT5G42050	Symbols: | similar to unknown protein [Arabidopsis thaliana] (TAIR:AT3G27090.1); similar to N-rich protein [Glycine max] (GB:CAI44933.1); contains domain KELCH-RELATED PROTEINS (PTHR23230); contains domain no description (SM00767); contains domain gb def: Hypothetical protein At5g42050 (PTHR23230:SF16) | chr5:16832858-16834160 FORWARD	7152.57	752.434	0.105198	9.50591
Brapa_ESTC014490	AT3G42950	Symbols: | glycoside hydrolase family 28 protein / polygalacturonase (pectinase) family protein | chr3:15026371-15028788 FORWARD	1984.01	209.279	0.105483	9.48022
Brapa_ESTC011698	AT5G43760	Symbols: | beta-ketoacyl-CoA synthase, putative | chr5:17603130-17605713 FORWARD	9816.35	1041.99	0.106148	9.42077
Brapa_ESTC012181	AT4G36010	Symbols: | pathogenesis-related thaumatin family protein | chr4:17039475-17040979 REVERSE	5429.96	577.803	0.10641	9.3976
Brapa_ESTC006958	AT5G61380	Symbols: APRR1, PRR1, TOC1 | TOC1 (TIMING OF CAB1 1); transcription regulator | chr5:24692766-24695402 FORWARD	3611.44	384.422	0.106446	9.39447
Brapa_ESTC011656	AT1G18210	Symbols: | calcium-binding protein, putative | chr1:6268266-6268778 REVERSE	4473.11	477.472	0.106743	9.36832
Brapa_ESTC014295	AT5G62520	Symbols: SRO5 | SRO5 (SIMILAR TO RCD ONE 5); NAD+ ADP-ribosyltransferase | chr5:25115297-25116490 FORWARD	1706.55	183.715	0.107653	9.28912
Brapa_ESTC049131	no_hits_f	---------	17539.7	1890.77	0.107799	9.27649
Brapa_ESTC023158	AT1G09530	Symbols: PIF3, POC1, PAP3 | PIF3 (PHYTOCHROME INTERACTING FACTOR 3); DNA binding / transcription factor/ transcription regulator | chr1:3077218-3079369 FORWARD	2825.54	304.615	0.107808	9.27577
Brapa_ESTC012204	AT2G01180	Symbols: PAP1, LPP1, ATLPP1, ATPAP1 | ATPAP1 (PHOSPHATIDIC ACID PHOSPHATASE 1); phosphatidate phosphatase | chr2:107181-108554 REVERSE	7682.38	828.78	0.107881	9.2695
Brapa_ESTC045121	AT4G36010	Symbols: | pathogenesis-related thaumatin family protein | chr4:17039475-17040979 REVERSE	15758.5	1701.14	0.107951	9.26349
Brapa_ESTC004638	AT2G39518	Symbols: | similar to integral membrane protein, putative [Arabidopsis thaliana] (TAIR:AT2G39530.1); similar to plant integral membrane protein TIGR01569 containing protein [Oryza sativa (japonica cultivar-group)] (GB:ABA94169.1); contains InterPro domain Protein of unknown function DUF588; (InterPro:IPR006702); contains InterPro domain Conserved hypothetical protein CHP1569, integral membrane pl…	33869.3	3656.22	0.107951	9.26347
Brapa_ESTC015237	AT1G05010	Symbols: EAT1, EFE | EFE (ethylene forming enzyme) | chr1:1431418-1432694 REVERSE	1229.82	133.161	0.108277	9.23559
Brapa_ESTC006756	AT3G49490	Symbols: | similar to hypothetical protein MtrDRAFT_AC119415g11v1 [Medicago truncatula] (GB:ABE85164.1) | chr3:18355911-18359633 REVERSE	4404.36	478.649	0.108676	9.20165
Brapa_ESTC017150	AT1G12200	Symbols: | flavin-containing monooxygenase family protein / FMO family protein | chr1:4137625-4139833 FORWARD	4279.79	465.373	0.108737	9.19647
Brapa_ESTC009849	AT4G16120	| Symbols: COBL7, ATSEB1 | ATSEB1 | chr4:9116602-9119149 REVERSE	5686.27	618.839	0.10883	9.18861
Brapa_ESTC000603	AT4G24220	Symbols: AWI31, VEP1 | VEP1 (VEIN PATTERNING 1) | chr4:12565229-12566484 FORWARD	23465	2573.68	0.109682	9.1173
Brapa_ESTC041455	no_hits_f	---------	3670.34	404.867	0.110308	9.06554
Brapa_ESTC027765	AT1G14780	Symbols: | similar to unknown protein [Arabidopsis thaliana] (TAIR:AT4G24290.2); similar to Membrane attack complex component/perforin/complement C9 [Medicago truncatula] (GB:ABE92593.1); similar to Os06g0251100 [Oryza sativa (japonica cultivar-group)] (GB:NP_001057295.1); similar to Os02g0736300 [Oryza sativa (japonica cultivar-group)] (GB:NP_001048052.1); contains InterPro domain Membrane attac…	3014.29	333.134	0.110518	9.04828
Brapa_ESTC008926	AT1G30360	Symbols: ERD4 | ERD4 (EARLY-RESPONSIVE TO DEHYDRATION 4) | chr1:10715874-10718781 FORWARD	17227.8	1913.87	0.111092	9.00155
Brapa_ESTC006853	AT1G50010	Symbols: TUA2 | TUA2 (tubulin alpha-2 chain) | chr1:18521405-18523397 FORWARD	5168.54	574.904	0.111231	8.99027
Brapa_ESTC030802	no_hits_f	---------	1330.34	148.974	0.111982	8.93001
Brapa_ESTC011715	AT1G19770	Symbols: ATPUP14 | ATPUP14 (Arabidopsis thaliana purine permease 14); purine transporter | chr1:6832417-6833693 FORWARD	20510.3	2301.78	0.112226	8.91063
Brapa_ESTC035563	AT3G55890	Symbols: | yippee family protein | chr3:20751887-20752847 FORWARD	1996.38	224.38	0.112393	8.89732
Brapa_ESTC021926	AT5G19590	Symbols: | similar to unknown protein [Arabidopsis thaliana] (TAIR:AT4G02360.1); similar to protein of unknown function [Oryza sativa (japonica cultivar-group)] (GB:AAT76982.1); similar to unknown protein [Oryza sativa (japonica cultivar-group)] (GB:AAO38494.1); similar to Os01g0595400 [Oryza sativa (japonica cultivar-group)] (GB:NP_001043469.1); contains InterPro domain Protein of unknown functi…	4540.19	511.822	0.112731	8.87064
Brapa_ESTC051638	AT5G60300	Symbols: | lectin protein kinase family protein | chr5:24282088-24285199 FORWARD	1779.46	200.689	0.112781	8.86675
Brapa_ESTC023981	AT3G61400	Symbols: | 2-oxoglutarate-dependent dioxygenase, putative | chr3:22729931-22731372 FORWARD	2173.52	245.349	0.112881	8.85889
Brapa_ESTC008566	AT4G31180	Symbols: | aspartyl-tRNA synthetase, putative / aspartate--tRNA ligase, putative | chr4:15156702-15159368 FORWARD	2103.33	239.176	0.113713	8.79407
Brapa_ESTC013058	AT1G30730	Symbols: | FAD-binding domain-containing protein | chr1:10900836-10902416 FORWARD	4376.3	499.634	0.114168	8.75901
Brapa_ESTC028298	AT5G10430	Symbols: ATAGP4, AGP4 | AGP4 (ARABINOGALACTAN-PROTEIN 4) | chr5:3277829-3278236 REVERSE	9164.67	1048.84	0.114444	8.73791
Brapa_ESTC018854	AT1G79470	Symbols: | inosine-5'-monophosphate dehydrogenase | chr1:29899665-29901554 REVERSE	12868	1473.05	0.114474	8.73562
Brapa_ESTC002792	AT4G26130	Symbols: | similar to unknown protein [Arabidopsis thaliana] (TAIR:AT5G56980.1); similar to cDNA-5-encoded protein (GB:AAA50235.1) | chr4:13240412-13241272 REVERSE	7276.53	834.279	0.114653	8.72194
Brapa_ESTC018020	AT1G07360	Symbols: | zinc finger (CCCH-type) family protein / RNA recognition motif (RRM)-containing protein | chr1:2260560-2262793 REVERSE	2224.35	256.75	0.115427	8.66349
Brapa_ESTC002919	AT2G22470	Symbols: ATAGP2, AGP2 | AGP2 (ARABINOGALACTAN-PROTEIN 2) | chr2:9545480-9545875 REVERSE	3391.17	394.518	0.116337	8.59573
Brapa_ESTC016980	AT3G26730	Symbols: | zinc finger (C3HC4-type RING finger) family protein | chr3:9825007-9828507 FORWARD	1518.66	177.74	0.117037	8.54428
Brapa_ESTC003657	no_hits_f	---------	7526.21	882.927	0.117314	8.52416
Brapa_ESTC002087	AT3G13310	Symbols: | DNAJ heat shock N-terminal domain-containing protein | chr3:4310834-4311307 REVERSE	10429.8	1224.18	0.117373	8.51983
Brapa_ESTC039641	AT1G16840	Symbols: | similar to unknown protein [Arabidopsis thaliana] (TAIR:AT1G78890.1); similar to At1g16840/F17F16.27-related [Medicago truncatula] (GB:ABE84583.1) | chr1:5763104-5763977 REVERSE	18626.1	2194.62	0.117825	8.48716
Brapa_ESTC012970	AT1G27760	Symbols: | interferon-related developmental regulator family protein / IFRD protein family | chr1:9668882-9671309 FORWARD	6228.05	735.561	0.118105	8.46707
Brapa_ESTC012008	AT2G47890	Symbols: | zinc finger (B-box type) family protein | chr2:19615315-19616546 FORWARD	17098.2	2024.78	0.118421	8.44447
Brapa_ESTC048815	AT3G03440	Symbols: | armadillo/beta-catenin repeat family protein | chr3:815716-818575 FORWARD	4820.27	571.663	0.118596	8.43201
Brapa_ESTC050267	no_hits_f	---------	14981.7	1785.02	0.119147	8.39302
Brapa_ESTC000609	AT1G18740	Symbols: | similar to unknown protein [Arabidopsis thaliana] (TAIR:AT1G74450.1); similar to Protein of unknown function DUF793 [Medicago truncatula] (GB:ABE83157.1); contains InterPro domain Protein of unknown function DUF793; (InterPro:IPR008511) | chr1:6464116-6465264 FORWARD	2466.93	293.935	0.11915	8.39277
Brapa_ESTC039250	AT1G02660	Symbols: | lipase class 3 family protein | chr1:572187-574746 REVERSE	5734.38	686.71	0.119753	8.35051
Brapa_ESTC011999	AT3G23810	Symbols: SAHH2 | SAHH2 (S-ADENOSYL-L-HOMOCYSTEINE (SAH) HYDROLASE 2); adenosylhomocysteinase | chr3:8588020-8589678 REVERSE	6407.45	769.616	0.120113	8.32552
Brapa_ESTC023761	AT2G32930	Symbols: ZFN2 | ZFN2 (ZINC FINGER PROTEIN 2); nucleic acid binding | chr2:13973067-13975496 REVERSE	5208.25	628.934	0.120757	8.28108
Brapa_ESTC016725	AT4G39370	Symbols: UBP27 | UBP27 (UBIQUITIN-SPECIFIC PROTEASE 27); ubiquitin-specific protease | chr4:18306386-18308619 FORWARD	2087.51	252.824	0.121113	8.25677
Brapa_ESTC010665	AT1G28290	Symbols: | pollen Ole e 1 allergen and extensin family protein | chr1:9889318-9890830 REVERSE	3666.3	446.776	0.12186	8.20613
Brapa_ESTC039767	AT1G19770	Symbols: ATPUP14 | ATPUP14 (Arabidopsis thaliana purine permease 14); purine transporter | chr1:6832417-6833693 FORWARD	8743.16	1065.72	0.121892	8.20399
Brapa_ESTC017386	AT5G49650	Symbols: | xylulose kinase, putative | chr5:20170124-20172800 FORWARD	2776.35	339.202	0.122176	8.18495
Brapa_ESTC027961	AT1G19770	Symbols: ATPUP14 | ATPUP14 (Arabidopsis thaliana purine permease 14); purine transporter | chr1:6832417-6833693 FORWARD	8729.51	1068.19	0.122365	8.17224
Brapa_ESTC024455	AT2G47260	Symbols: WRKY23 | WRKY23 (WRKY DNA-binding protein 23); transcription factor | chr2:19412115-19413516 REVERSE	4666.14	580.146	0.124331	8.04304
Brapa_ESTC019994	AT5G20830	Symbols: SUS1, ASUS1, ATSUS1 | SUS1 (SUCROSE SYNTHASE 1); UDP-glycosyltransferase/ sucrose synthase | chr5:7050601-7054034 REVERSE	7707.87	960.118	0.124563	8.02804
Brapa_ESTC010389	AT1G30820	Symbols: | CTP synthase, putative / UTP--ammonia ligase, putative | chr1:10945232-10948806 REVERSE	7629.78	951.01	0.124644	8.02282
Brapa_ESTC019405	AT1G61800	Symbols: GPT2 | GPT2 (glucose-6-phosphate/phosphate translocator 2); antiporter/ glucose-6-phosphate transporter | chr1:22828192-22830124 FORWARD	4031.65	503.711	0.124939	8.0039
Brapa_ESTC024176	AT4G33985	Symbols: | similar to unknown protein [Arabidopsis thaliana] (TAIR:AT2G15590.2); similar to Os04g0282200 [Oryza sativa (japonica cultivar-group)] (GB:NP_001052367.1); similar to Os02g0766600 [Oryza sativa (japonica cultivar-group)] (GB:NP_001048224.1); similar to Os01g0898800 [Oryza sativa (japonica cultivar-group)] (GB:NP_001045096.1); contains InterPro domain Protein of unknown function DUF1685…	11650.8	1456.29	0.124995	8.00033
Brapa_ESTC035074	AT3G57710	Symbols: | protein kinase family protein | chr3:21397210-21398265 REVERSE	1154.61	144.735	0.125354	7.97741
Brapa_ESTC005598	AT1G02310	Symbols: | glycosyl hydrolase family protein 5 / cellulase family protein / (1-4)-beta-mannan endohydrolase, putative | chr1:458243-460652 REVERSE	7348.64	924.048	0.125744	7.95266
Brapa_ESTC021336	AT1G54150	Symbols: | zinc finger (C3HC4-type RING finger) family protein | chr1:20219147-20220970 FORWARD	8363.56	1052.1	0.125796	7.9494
Brapa_ESTC008784	AT1G54030	Symbols: | GDSL-motif lipase, putative | chr1:20171353-20173144 FORWARD	5102.98	643.349	0.126073	7.9319
Brapa_ESTC029546	AT4G22710	Symbols: CYP706A2 | CYP706A2 (cytochrome P450, family 706, subfamily A, polypeptide 2); oxygen binding | chr4:11935049-11936629 FORWARD	6262.32	791.27	0.126354	7.91426
Brapa_ESTC018270	AT3G04090	Symbols: SIP1;1, SIP1A | SIP1;1 (SMALL AND BASIC INTRINSIC PROTEIN 1A) | chr3:1072347-1074038 REVERSE	1816.58	229.749	0.126473	7.9068
Brapa_ESTC015418	AT2G27080	Symbols: | harpin-induced protein-related / HIN1-related / harpin-responsive protein-related | chr2:11573461-11574243 FORWARD	4324.37	549.093	0.126976	7.87548
Brapa_ESTC019184	AT4G13350	Symbols: | human Rev interacting-like protein-related / hRIP protein-related | chr4:7770166-7773317 REVERSE	2203.19	281.729	0.127873	7.82025
Brapa_ESTC020887	AT3G27200	Symbols: | plastocyanin-like domain-containing protein | chr3:10044975-10045577 REVERSE	6250.34	800.953	0.128146	7.80363
Brapa_ESTC021546	AT4G24690	Symbols: | ubiquitin-associated (UBA)/TS-N domain-containing protein / octicosapeptide/Phox/Bemp1 (PB1) domain-containing protein | chr4:12741201-12744212 FORWARD	8632.76	1108.89	0.128451	7.78505
Brapa_ESTC051094	no_hits_f	---------	3133.4	402.971	0.128605	7.77575
Brapa_ESTC028180	AT1G21310	Symbols: RSH, ATEXT3 | ATEXT3 (EXTENSIN 3); structural constituent of cell wall | chr1:7453681-7454976 REVERSE	2015.3	260.063	0.129044	7.74928
Brapa_ESTC002050	AT1G17170	Symbols: ATGSTU24 | ATGSTU24 (Arabidopsis thaliana Glutathione S-transferase (class tau) 24); glutathione transferase | chr1:5869888-5870684 FORWARD	12948.6	1676.42	0.129467	7.72396
Brapa_ESTC034058	AT1G40087	Symbols: | similar to fructose-6-phosphate 2-kinase-related / fructose-2,6-bisphosphatase-related [Arabidopsis thaliana] (TAIR:AT3G30200.1); similar to IMP dehydrogenase/GMP reductase [Medicago truncatula] (GB:ABE87262.1) | chr1:15002203-15004309 REVERSE	1457.28	188.694	0.129484	7.72298
Brapa_ESTC023657	AT1G67800	Symbols: | protein binding / zinc ion binding | chr1:25424692-25426900 REVERSE	1943.05	252.702	0.130054	7.6891
Brapa_ESTC015353	AT1G29690	Symbols: CAD1 | CAD1 (CONSTITUTIVELY ACTIVATED CELL DEATH 1); oxidoreductase | chr1:10379296-10381847 REVERSE	3774.86	492.905	0.130576	7.65839
Brapa_ESTC011961	AT1G07350	Symbols: | transformer serine/arginine-rich ribonucleoprotein, putative | chr1:2257730-2260099 REVERSE	1216.7	159.284	0.130915	7.63856
Brapa_ESTC019430	AT4G34150	Symbols: | C2 domain-containing protein | chr4:16355039-16356959 FORWARD	6704.93	878.849	0.131075	7.62922
Brapa_ESTC005981	AT1G45688	Symbols: | similar to unknown protein [Arabidopsis thaliana] (TAIR:AT5G42860.1); similar to H0814G11.12 [Oryza sativa (indica cultivar-group)] (GB:CAJ86345.1); similar to CAA30379.1 protein [Oryza sativa] (GB:CAB53482.1) | chr1:17193942-17195310 FORWARD	3136.55	413.325	0.131777	7.58858
Brapa_ESTC049081	no_hits_f	---------	4513.9	594.828	0.131777	7.58858
Brapa_ESTC016291	AT2G38280	Symbols: ATAMPD, FAC1 | FAC1 (EMBRYONIC FACTOR1); AMP deaminase | chr2:16040845-16045871 REVERSE	1048.07	138.786	0.132421	7.5517
Brapa_ESTC008587	AT2G39210	| Symbols: | nodulin family protein | chr2:16373365-16375309 REVERSE	3859.03	511.634	0.132581	7.54256
Brapa_ESTC003343	AT3G14350	Symbols: | leucine-rich repeat transmembrane protein kinase, putative | chr3:4783122-4787006 REVERSE	1713.23	227.304	0.132676	7.53717
Brapa_ESTC019929	AT4G14960	Symbols: TUA6 | TUA6 (tubulin alpha-6 chiain) | chr4:8548765-8550315 REVERSE	8337.38	1108.62	0.13297	7.5205
Brapa_ESTC005143	AT4G29780	Symbols: | similar to unknown protein [Arabidopsis thaliana] (TAIR:AT5G12010.1); similar to Os01g0582600 [Oryza sativa (japonica cultivar-group)] (GB:NP_001043414.1); similar to Os05g0593000 [Oryza sativa (japonica cultivar-group)] (GB:NP_001056499.1); similar to unknown protein [Oryza sativa (japonica cultivar-group)] (GB:BAD72250.1) | chr4:14579865-14581487 FORWARD	5092.19	677.403	0.133028	7.51722
Brapa_ESTC009684	AT5G02640	Symbols: | similar to unknown protein [Arabidopsis thaliana] (TAIR:AT3G46300.1); similar to unnamed protein product [Oryza sativa] (GB:BAA90509.1); similar to Os05g0120300 [Oryza sativa (japonica cultivar-group)] (GB:NP_001054491.1) | chr5:594332-594817 REVERSE	7980.44	1065.21	0.133478	7.49189
Brapa_ESTC023004	AT1G10550	Symbols: XET, XTH33 | XTH33 (xyloglucan:xyloglucosyl transferase 33); hydrolase, acting on glycosyl bonds | chr1:3479258-3480958 REVERSE	22466.6	2999.22	0.133497	7.49081
Brapa_ESTC006747	AT5G08670	Symbols: | ATP synthase beta chain 1, mitochondrial | chr5:2818396-2821150 REVERSE	2514.06	335.942	0.133625	7.48361
Brapa_ESTC028833	no_hits_f	---------	1310.43	175.262	0.133744	7.47698
Brapa_ESTC002975	AT1G19180	Symbols: | similar to unknown protein [Arabidopsis thaliana] (TAIR:AT1G74950.1); similar to PnFL-2 [Ipomoea nil] (GB:AAG49896.1); contains InterPro domain ZIM; (InterPro:IPR010399) | chr1:6622303-6623262 FORWARD	2658.56	356.247	0.134	7.46269
Brapa_ESTC004878	AT3G18280	Symbols: | protease inhibitor/seed storage/lipid transfer protein (LTP) family protein | chr3:6267108-6267398 FORWARD	3258.34	437.947	0.134408	7.44003
Brapa_ESTC014207	AT1G45688	Symbols: | similar to unknown protein [Arabidopsis thaliana] (TAIR:AT5G42860.1); similar to H0814G11.12 [Oryza sativa (indica cultivar-group)] (GB:CAJ86345.1); similar to CAA30379.1 protein [Oryza sativa] (GB:CAB53482.1) | chr1:17193942-17195310 FORWARD	4183.62	564.898	0.135026	7.40597
Brapa_ESTC013187	AT5G37540	Symbols: | aspartyl protease family protein | chr5:14930092-14931420 FORWARD	2310.11	312.091	0.135098	7.40204
Brapa_ESTC017483	AT1G27200	Symbols: | similar to zinc finger (C3HC4-type RING finger) family protein [Arabidopsis thaliana] (TAIR:AT3G27330.1); similar to Os08g0121900 [Oryza sativa (japonica cultivar-group)] (GB:NP_001060883.1); similar to zinc finger (C3HC4-type RING finger) protein family-like [Oryza sativa (japonica cultivar-group)] (GB:BAD10590.1); contains InterPro domain Protein of unknown function DUF23; (InterPro:…	9109.71	1235.43	0.135617	7.37372
Brapa_ESTC013907	AT4G30170	| Symbols: | peroxidase, putative | chr4:14762928-14764488 FORWARD	1931.24	262.626	0.135988	7.35358
Brapa_ESTC029560	AT1G76930	Symbols: ORG5, ATEXT1, ATEXT4 | ATEXT4 (EXTENSIN 4) | chr1:28900595-28901747 REVERSE	51790.9	7089.01	0.136878	7.3058
Brapa_ESTC005703	AT2G23090	Symbols: | similar to hypothetical protein [Cicer arietinum] (GB:CAA10129.1) | chr2:9836737-9837354 REVERSE	2295.84	315.305	0.137338	7.28133
Brapa_ESTC021534	AT3G29190	Symbols: | terpene synthase/cyclase family protein | chr3:11160610-11163800 REVERSE	2685.62	369.026	0.137408	7.27759
Brapa_ESTC020607	AT2G44410	Symbols: | protein binding / zinc ion binding | chr2:18335949-18337190 FORWARD	3254.64	447.445	0.137479	7.27383
Brapa_ESTC011792	AT3G15630	Symbols: | similar to unknown protein [Arabidopsis thaliana] (TAIR:AT1G52720.1); similar to conserved hypothetical protein [Medicago truncatula] (GB:ABE92597.1) | chr3:5297195-5297518 REVERSE	7070.18	972.221	0.13751	7.27219
Brapa_ESTC045101	AT4G36210	Symbols: | similar to unknown protein [Arabidopsis thaliana] (TAIR:AT2G18100.1); similar to expressed protein [Oryza sativa (japonica cultivar-group)] (GB:ABF93615.1); similar to Os03g0112800 [Oryza sativa (japonica cultivar-group)] (GB:NP_001048731.1); contains InterPro domain Protein of unknown function DUF726; (InterPro:IPR007941) | chr4:17130954-17134305 FORWARD	2218.23	305.041	0.137515	7.27191
Brapa_ESTC005786	AT3G13060	| Symbols: ECT5 | ECT5 | chr3:4180632-4183304 FORWARD	17831.8	2456.68	0.13777	7.2585
Brapa_ESTC002395	AT1G02870	Symbols: | similar to hypothetical protein MtrDRAFT_AC161032g9v1 [Medicago truncatula] (GB:ABE85046.1) | chr1:637401-638603 REVERSE	2483.7	342.238	0.137794	7.25723
Brapa_ESTC011647	AT2G40340	Symbols: | AP2 domain-containing transcription factor, putative (DRE2B) | chr2:16855743-16857435 REVERSE	9460.24	1304.69	0.137913	7.25095
Brapa_ESTC018536	AT2G48110	Symbols: | structural constituent of ribosome | chr2:19680440-19686564 FORWARD	1592.53	219.649	0.137925	7.25034
Brapa_ESTC015644	AT1G16860	Symbols: | merozoite surface protein-related | chr1:5768273-5770176 FORWARD	12515.4	1726.5	0.13795	7.249
Brapa_ESTC016857	AT1G18450	Symbols: ARP4, ATARP4 | ATARP4 (ACTIN-RELATED PROTEIN 4); structural constituent of cytoskeleton | chr1:6348192-6351759 FORWARD	1244.03	171.75	0.138059	7.24326
Brapa_ESTC007292	AT4G02330	Symbols: | pectinesterase family protein | chr4:1032479-1034928 FORWARD	11727.8	1619.93	0.138127	7.2397
Brapa_ESTC025151	AT2G03820	Symbols: | nonsense-mediated mRNA decay NMD3 family protein | chr2:1165146-1166696 REVERSE	2196.26	303.439	0.138162	7.2379
Brapa_ESTC005006	no_hits_f	---------	8411.36	1165.14	0.13852	7.21918
Brapa_ESTC019770	AT3G52930	Symbols: | fructose-bisphosphate aldolase, putative | chr3:19638361-19639852 REVERSE	6385.62	885.261	0.138634	7.21326
Brapa_ESTC010474	AT1G22570	Symbols: | proton-dependent oligopeptide transport (POT) family protein | chr1:7976609-7978562 REVERSE	25844.6	3583.6	0.13866	7.21191
Brapa_ESTC024622	AT4G32600	Symbols: | zinc finger (C3HC4-type RING finger) family protein | chr4:15724016-15725743 FORWARD	2418.28	335.574	0.138766	7.2064
Brapa_ESTC002126	AT5G61380	Symbols: APRR1, PRR1, TOC1 | TOC1 (TIMING OF CAB1 1); transcription regulator | chr5:24692766-24695402 FORWARD	1443.4	200.361	0.138812	7.204
Brapa_ESTC032505	AT5G19590	Symbols: | similar to unknown protein [Arabidopsis thaliana] (TAIR:AT4G02360.1); similar to protein of unknown function [Oryza sativa (japonica cultivar-group)] (GB:AAT76982.1); similar to unknown protein [Oryza sativa (japonica cultivar-group)] (GB:AAO38494.1); similar to Os01g0595400 [Oryza sativa (japonica cultivar-group)] (GB:NP_001043469.1); contains InterPro domain Protein of unknown functi…	3267.46	453.569	0.138814	7.20389
Brapa_ESTC034808	AT2G45750	Symbols: | dehydration-responsive family protein | chr2:18849729-18852417 FORWARD	5406.44	751.325	0.138969	7.19587
Brapa_ESTC024828	AT1G73200	Symbols: | similar to unknown protein [Arabidopsis thaliana] (TAIR:AT1G17820.1); similar to unknown protein [Oryza sativa (japonica cultivar-group)] (GB:BAD23057.1); similar to Os02g0827500 [Oryza sativa (japonica cultivar-group)] (GB:NP_001048594.1); contains InterPro domain Pleckstrin homology-type; (InterPro:IPR011993) | chr1:27527115-27530234 REVERSE	2858.61	398.117	0.139269	7.18033
Brapa_ESTC008066	AT3G55610	Symbols: P5CS2 | P5CS2 (DELTA 1-PYRROLINE-5-CARBOXYLATE SYNTHASE 2); catalytic/ glutamate 5-kinase/ glutamate-5-semialdehyde dehydrogenase | chr3:20635257-20639968 REVERSE	21665.2	3021.17	0.139448	7.17113
Brapa_ESTC014100	AT4G26690	Symbols: MRH5, SHV3 | MRH5/SHV3 (morphogenesis of root hair 5); glycerophosphodiester phosphodiesterase/ kinase | chr4:13456799-13459896 REVERSE	7170.23	1001.54	0.13968	7.1592
Brapa_ESTC018475	AT4G32760	| Symbols: | protein transporter | chr4:15799381-15803837 FORWARD	7782.95	1088.82	0.139898	7.14806
Brapa_ESTC031023	no_hits_f	---------	2511.98	351.752	0.14003	7.14134
Brapa_ESTC028756	AT3G15000	Symbols: | Identical to Unknown mitochondrial protein At3g15000 [Arabidopsis Thaliana] (GB:Q9LKA5); similar to unknown protein [Arabidopsis thaliana] (TAIR:AT1G53260.1); similar to Os09g0509000 [Oryza sativa (japonica cultivar-group)] (GB:NP_001063625.1); similar to DAG protein, chloroplast precursor, putative, expressed [Oryza sativa (japonica cultivar-group)] (GB:ABF97301.1); similar to Os09g01…	4616.66	647.65	0.140285	7.12833
Brapa_ESTC019230	AT5G62520	Symbols: SRO5 | SRO5 (SIMILAR TO RCD ONE 5); NAD+ ADP-ribosyltransferase | chr5:25115297-25116490 FORWARD	6168.38	866.508	0.140476	7.11866
[truncated: 5,100 more rows]
