# Supplementary material for: Identification of Yellow Pigmentation Genes in Brassica rapa ssp. pekinensis Using Br300 Microarray
Source: Int J Genomics. 2014 Dec 31;2014:204969. doi: 10.1155/2014/204969 (PMC4297637; doi:10.1155/2014/204969)
Supplement: Supplementary file 1 — In this study, we used Br300K B. rapa microarray and identified three genes as functionally novel genes that involved in yellow color pigmentation. Supplementary figures (Figure S1 to S3) explains the information about plant materials and correlation coefficient of two experimental results. The three identified transcription factor genes are specifically expressed and confirmed their relatedness in yellow pigmentation. Table S1 to S9 supports our results and provides detailed annotation information of some differentially expressed genes. [file 204969.f1.zip › mat.204969.v2/Table S5.xls]

## Sheet: Table
Table S5. List of genes classified as no_hits_found
B. rapa SEQ_ID	A. thaliana locus	A_thaliana_homologue_Description	PI values		Fold Change (Y/W)
			White leaves	Yellow leaves
Brapa_ESTC048334	no_hits_f	---------	12.873	21498.1	1670.01
Brapa_ESTC042517	no_hits_f	---------	16.0881	25294	1572.22
Brapa_ESTC028538	no_hits_f	---------	32.2786	16831.4	521.441
Brapa_ESTC006072	no_hits_f	---------	13.8436	4401.46	317.942
Brapa_ESTC000684	no_hits_f	---------	91.0218	28921.2	317.739
Brapa_ESTC047077	no_hits_f	---------	56.4722	15360.8	272.006
Brapa_ESTC002823	no_hits_f	---------	9.1996	2430.08	264.151
Brapa_ESTC048810	no_hits_f	---------	62.409	14519.8	232.656
Brapa_ESTC049103	no_hits_f	---------	6.6526	1502.8	225.897
Brapa_ESTC041578	no_hits_f	---------	86.7927	17882.8	206.04
Brapa_ESTC002681	no_hits_f	---------	175.036	29165.1	166.623
Brapa_ESTC002391	no_hits_f	---------	197.189	27114.8	137.507
Brapa_ESTC042977	no_hits_f	---------	58.1578	7584.58	130.414
Brapa_ESTC051844	no_hits_f	---------	31.5718	3996.84	126.595
Brapa_ESTC048862	no_hits_f	---------	11.9184	1432.96	120.231
Brapa_ESTC048850	no_hits_f	---------	187.355	18359.2	97.9915
Brapa_ESTC048809	no_hits_f	---------	168.136	16361	97.3081
Brapa_ESTC049305	no_hits_f	---------	100.028	8073.46	80.712
Brapa_ESTC051843	no_hits_f	---------	98.0062	7790.54	79.4903
Brapa_ESTC028729	no_hits_f	---------	14.9919	1054.74	70.354
Brapa_ESTC050303	no_hits_f	---------	25.001	1666.64	66.6629
Brapa_ESTC002994	no_hits_f	---------	116.343	7751.69	66.6279
Brapa_ESTC036951	no_hits_f	---------	173.067	8609.99	49.7495
Brapa_ESTC002008	no_hits_f	---------	444.923	19448.4	43.7118
Brapa_ESTC002504	no_hits_f	---------	111.895	4819.83	43.0746
Brapa_ESTC048903	no_hits_f	---------	403.911	15662.7	38.7776
Brapa_ESTC048717	no_hits_f	---------	51.7276	1871.12	36.1726
Brapa_ESTC049863	no_hits_f	---------	88.7845	3069.05	34.5674
Brapa_ESTC028641	no_hits_f	---------	58.3782	2001.04	34.2772
Brapa_ESTC029406	no_hits_f	---------	79.0181	2641.64	33.4308
Brapa_ESTC048861	no_hits_f	---------	320.473	10640.9	33.2037
Brapa_ESTC048904	no_hits_f	---------	211.488	6873.13	32.4989
Brapa_ESTC050040	no_hits_f	---------	33.0564	1032.97	31.2487
Brapa_ESTC029348	no_hits_f	---------	71.8189	2187.08	30.4527
Brapa_ESTC045302	no_hits_f	---------	297.453	9027.25	30.3485
Brapa_ESTC050134	no_hits_f	---------	321.355	8777.89	27.3152
Brapa_ESTC051084	no_hits_f	---------	89.8578	2194.31	24.4198
Brapa_ESTC039936	no_hits_f	---------	75.076	1749.27	23.3
Brapa_ESTC047771	no_hits_f	---------	117.436	2583.96	22.0031
Brapa_ESTC048855	no_hits_f	---------	189.255	3946.85	20.8547
Brapa_ESTC051922	no_hits_f	---------	196.631	4048.47	20.5892
Brapa_ESTC050133	no_hits_f	---------	229.95	4704.58	20.4591
Brapa_ESTC029601	no_hits_f	---------	71.534	1444.76	20.1968
Brapa_ESTC035168	no_hits_f	---------	217.786	3868.99	17.7651
Brapa_ESTC048711	no_hits_f	---------	79.488	1399.76	17.6097
Brapa_ESTC003714	no_hits_f	---------	446.578	7751.97	17.3586
Brapa_ESTC036064	no_hits_f	---------	167.424	2806.12	16.7606
Brapa_ESTC049864	no_hits_f	---------	148.473	2485.32	16.7392
Brapa_ESTC013919	no_hits_f	---------	176.766	2815.67	15.9288
Brapa_ESTC048867	no_hits_f	---------	289.694	4440.2	15.3272
Brapa_ESTC036360	no_hits_f	---------	487.574	7418.32	15.2148
Brapa_ESTC048871	no_hits_f	---------	167.725	2329.99	13.8917
Brapa_ESTC051425	no_hits_f	---------	356.724	4796.11	13.4449
Brapa_ESTC031484	no_hits_f	---------	265.824	3455.84	13.0005
Brapa_ESTC048712	no_hits_f	---------	104.568	1321.49	12.6376
Brapa_ESTC051749	no_hits_f	---------	195.028	2452.17	12.5734
Brapa_ESTC051021	no_hits_f	---------	143.663	1732.07	12.0565
Brapa_ESTC048985	no_hits_f	---------	405.468	4883.6	12.0444
Brapa_ESTC030697	no_hits_f	---------	100.749	1207.84	11.9886
Brapa_ESTC021067	no_hits_f	---------	349.506	3803.76	10.8832
Brapa_ESTC051519	no_hits_f	---------	326.534	3494.12	10.7006
Brapa_ESTC019040	no_hits_f	---------	153.333	1623.05	10.5851
Brapa_ESTC048443	no_hits_f	---------	198.81	1917.68	9.64579
Brapa_ESTC004869	no_hits_f	---------	385.082	3618.2	9.39592
Brapa_ESTC038853	no_hits_f	---------	175.341	1641.76	9.36324
Brapa_ESTC048214	no_hits_f	---------	181.102	1678.51	9.26831
Brapa_ESTC028542	no_hits_f	---------	249.84	2257.63	9.0363
Brapa_ESTC050979	no_hits_f	---------	178.762	1573.56	8.80254
Brapa_ESTC049860	no_hits_f	---------	429.187	3594.84	8.37593
Brapa_ESTC051588	no_hits_f	---------	210.709	1752.21	8.31578
Brapa_ESTC034261	no_hits_f	---------	199.945	1640.66	8.20556
Brapa_ESTC051587	no_hits_f	---------	317.658	2600.05	8.18506
Brapa_ESTC050039	no_hits_f	---------	404.103	3237.16	8.01073
Brapa_ESTC011795	no_hits_f	---------	129.785	1038.62	8.00262
Brapa_ESTC014478	no_hits_f	---------	257.761	2044.11	7.93025
Brapa_ESTC051750	no_hits_f	---------	347.321	2609.9	7.51437
Brapa_ESTC047869	no_hits_f	---------	143.217	1052.6	7.34969
Brapa_ESTC047255	no_hits_f	---------	343.727	2524.64	7.3449
Brapa_ESTC049085	no_hits_f	---------	138.805	1013.23	7.29966
Brapa_ESTC005895	no_hits_f	---------	327.034	2339.77	7.15452
Brapa_ESTC028601	no_hits_f	---------	438.622	3091.75	7.04878
Brapa_ESTC044594	no_hits_f	---------	146.221	1016.96	6.95495
Brapa_ESTC048910	no_hits_f	---------	414.475	2717.86	6.55736
Brapa_ESTC000832	no_hits_f	---------	363.373	2349.14	6.46482
Brapa_ESTC048364	no_hits_f	---------	217.393	1396.65	6.42454
Brapa_ESTC044257	no_hits_f	---------	208.186	1308.28	6.28419
Brapa_ESTC051520	no_hits_f	---------	281.901	1714.03	6.08026
Brapa_ESTC048435	no_hits_f	---------	372.148	2261.24	6.07618
Brapa_ESTC034155	no_hits_f	---------	376.118	2263.22	6.01731
Brapa_ESTC049153	no_hits_f	---------	324.886	1948.19	5.99653
Brapa_ESTC046986	no_hits_f	---------	478.564	2868.85	5.9947
Brapa_ESTC028151	no_hits_f	---------	408.934	2429.42	5.94086
Brapa_ESTC029261	no_hits_f	---------	263.066	1518.67	5.77296
Brapa_ESTC030167	no_hits_f	---------	467.854	2677.32	5.72255
Brapa_ESTC003921	no_hits_f	---------	379.002	2157.24	5.6919
Brapa_ESTC028303	no_hits_f	---------	280.718	1585.68	5.64866
Brapa_ESTC051161	no_hits_f	---------	458.941	2569.68	5.59915
Brapa_ESTC037488	no_hits_f	---------	185.323	1026.27	5.53774
Brapa_ESTC051373	no_hits_f	---------	317.593	1751.39	5.51457
Brapa_ESTC001329	no_hits_f	---------	230.921	1236.39	5.35417
Brapa_ESTC028676	no_hits_f	---------	397.39	2100.22	5.28503
Brapa_ESTC009632	no_hits_f	---------	481.692	2532.16	5.2568
Brapa_ESTC030166	no_hits_f	---------	375.811	1972.63	5.24899
Brapa_ESTC022564	no_hits_f	---------	308.593	1594.34	5.16648
Brapa_ESTC034686	no_hits_f	---------	254.155	1304.79	5.13384
Brapa_ESTC049466	no_hits_f	---------	486.488	2478.07	5.09379
Brapa_ESTC042012	no_hits_f	---------	289.601	1469.17	5.07308
Brapa_ESTC048651	no_hits_f	---------	330.242	1652.59	5.00418
Brapa_ESTC049789	no_hits_f	---------	205.678	1023.91	4.97822
Brapa_ESTC050825	no_hits_f	---------	276.38	1341.51	4.85386
Brapa_ESTC003285	no_hits_f	---------	218.414	1052.14	4.81718
Brapa_ESTC042595	no_hits_f	---------	271.029	1287.73	4.75126
Brapa_ESTC051102	no_hits_f	---------	396.768	1873.14	4.721
Brapa_ESTC047205	no_hits_f	---------	273.156	1270.62	4.65163
Brapa_ESTC028129	no_hits_f	---------	236.848	1077.06	4.54747
Brapa_ESTC025795	no_hits_f	---------	439.488	1957.43	4.45389
Brapa_ESTC044198	no_hits_f	---------	464.806	2051.3	4.41324
Brapa_ESTC049790	no_hits_f	---------	252.299	1111.35	4.40489
Brapa_ESTC048983	no_hits_f	---------	346.78	1515.71	4.37081
Brapa_ESTC050957	no_hits_f	---------	457.017	1979.67	4.33172
Brapa_ESTC028631	no_hits_f	---------	249.806	1069.82	4.2826
Brapa_ESTC049955	no_hits_f	---------	494.34	2074.22	4.19594
Brapa_ESTC047123	no_hits_f	---------	380.028	1534.37	4.03752
Brapa_ESTC046823	no_hits_f	---------	467.799	1842.86	3.93943
Brapa_ESTC003880	no_hits_f	---------	383.77	1501.58	3.91271
Brapa_ESTC048437	no_hits_f	---------	362.859	1416.03	3.90242
Brapa_ESTC032777	no_hits_f	---------	422.736	1602.16	3.78998
Brapa_ESTC051083	no_hits_f	---------	275.332	1022.43	3.71344
Brapa_ESTC030992	no_hits_f	---------	325.861	1202.56	3.69041
Brapa_ESTC028108	no_hits_f	---------	433.914	1596.75	3.67988
Brapa_ESTC040535	no_hits_f	---------	479.81	1732.22	3.61022
Brapa_ESTC034086	no_hits_f	---------	349.826	1226.37	3.50566
Brapa_ESTC051614	no_hits_f	---------	490.511	1697.69	3.46106
Brapa_ESTC043202	no_hits_f	---------	316.878	1072.19	3.38361
Brapa_ESTC003914	no_hits_f	---------	367.802	1204.03	3.27358
Brapa_ESTC005914	no_hits_f	---------	402.879	1289.71	3.20123
Brapa_ESTC041374	no_hits_f	---------	329.769	1038.53	3.14927
Brapa_ESTC037161	no_hits_f	---------	446.091	1373.82	3.07969
Brapa_ESTC045816	no_hits_f	---------	419.524	1284.48	3.06176
Brapa_ESTC046541	no_hits_f	---------	456.306	1392.84	3.05243
Brapa_ESTC031835	no_hits_f	---------	420.333	1269.6	3.02046
Brapa_ESTC048446	no_hits_f	---------	443.566	1335.43	3.01067
Brapa_ESTC036944	no_hits_f	---------	433.351	1300.7	3.00149
Brapa_ESTC035379	no_hits_f	---------	474.082	1417.06	2.98906
Brapa_ESTC048894	no_hits_f	---------	486.856	1450.54	2.9794
Brapa_ESTC047961	no_hits_f	---------	454.381	1350.77	2.97277
Brapa_ESTC051248	no_hits_f	---------	382.416	1134.7	2.96719
Brapa_ESTC034228	no_hits_f	---------	425.129	1248.63	2.93706
Brapa_ESTC051542	no_hits_f	---------	490.855	1430.58	2.91447
Brapa_ESTC035777	no_hits_f	---------	460.98	1324.59	2.87342
Brapa_ESTC050515	no_hits_f	---------	414.852	1188.26	2.8643
Brapa_ESTC028421	no_hits_f	---------	394.724	1129.02	2.86028
Brapa_ESTC044459	no_hits_f	---------	486.714	1385.48	2.8466
Brapa_ESTC001243	no_hits_f	---------	368.172	1030.34	2.79853
Brapa_ESTC031419	no_hits_f	---------	468.798	1293.24	2.75863
Brapa_ESTC051809	no_hits_f	---------	407.238	1119.4	2.74876
Brapa_ESTC050826	no_hits_f	---------	476.954	1283.53	2.6911
Brapa_ESTC028714	no_hits_f	---------	450.526	1190.19	2.64178
Brapa_ESTC031139	no_hits_f	---------	476.01	1247.3	2.62032
Brapa_ESTC038094	no_hits_f	---------	444.509	1157.25	2.60343
Brapa_ESTC047530	no_hits_f	---------	406.158	1050.79	2.58715
Brapa_ESTC051796	no_hits_f	---------	475.475	1214.04	2.55332
Brapa_ESTC042001	no_hits_f	---------	410.356	1046.36	2.54988
Brapa_ESTC042353	no_hits_f	---------	428.238	1086.98	2.53826
Brapa_ESTC006319	no_hits_f	---------	477.599	1207.97	2.52926
Brapa_ESTC039676	no_hits_f	---------	400.563	1009.18	2.5194
Brapa_ESTC048868	no_hits_f	---------	426.286	1069.99	2.51003
Brapa_ESTC034188	no_hits_f	---------	443.878	1110.16	2.50105
Brapa_ESTC029479	no_hits_f	---------	426.406	1065.41	2.49858
Brapa_ESTC036078	no_hits_f	---------	444.895	1099.99	2.47247
Brapa_ESTC033907	no_hits_f	---------	455.684	1117.36	2.45205
Brapa_ESTC015884	no_hits_f	---------	449.378	1077.83	2.39849
Brapa_ESTC034073	no_hits_f	---------	484.831	1130.24	2.3312
Brapa_ESTC017930	no_hits_f	---------	497.655	1138.12	2.28697
Brapa_ESTC001189	no_hits_f	---------	498.416	1139.53	2.2863
Brapa_ESTC018820	no_hits_f	---------	493.823	1122.65	2.27339
Brapa_ESTC038065	no_hits_f	---------	497.289	1130.32	2.27296
Brapa_ESTC051277	no_hits_f	---------	492.923	1117.13	2.26634
Brapa_ESTC033013	no_hits_f	---------	488.232	1103.22	2.25962
Brapa_ESTC039481	no_hits_f	---------	495.545	1109.63	2.23921
Brapa_ESTC000474	no_hits_f	---------	496.806	1086.51	2.18699
