# Supplementary material for: Identification of Yellow Pigmentation Genes in Brassica rapa ssp. pekinensis Using Br300 Microarray
Source: Int J Genomics. 2014 Dec 31;2014:204969. doi: 10.1155/2014/204969 (PMC4297637; doi:10.1155/2014/204969)
Supplement: Supplementary file 1 — In this study, we used Br300K B. rapa microarray and identified three genes as functionally novel genes that involved in yellow color pigmentation. Supplementary figures (Figure S1 to S3) explains the information about plant materials and correlation coefficient of two experimental results. The three identified transcription factor genes are specifically expressed and confirmed their relatedness in yellow pigmentation. Table S1 to S9 supports our results and provides detailed annotation information of some differentially expressed genes. [file 204969.f1.zip › mat.204969.v2/Table S6.xls]

## Sheet: Table
Table S6. Genes specifically expresssed in yellow inner leaves
B. rapa SEQ_ID	A. thaliana locus	A_thaliana_homologue_Description	PI values		Fold Change (Y/W)
			White leaves	Yellow leaves
Brapa_ESTC048334	no_hits_f	---------	12.873	21498.1	1670.01
Brapa_ESTC042517	no_hits_f	---------	16.0881	25294	1572.22
Brapa_ESTC028538	no_hits_f	---------	32.2786	16831.4	521.441
Brapa_ESTC005522	AT3G47540	Chitinase, putative	34.5374	13990.1	405.071
Brapa_ESTC006072	no_hits_f	---------	13.8436	4401.46	317.942
Brapa_ESTC000684	no_hits_f	---------	91.0218	28921.2	317.739
Brapa_ESTC005061	AT4G30660	Low temperature and salt responsive protein family	37.784	11124.6	294.426
Brapa_ESTC047077	no_hits_f	---------	56.4722	15360.8	272.006
Brapa_ESTC002823	no_hits_f	---------	9.1996	2430.08	264.151
Brapa_ESTC048810	no_hits_f	---------	62.409	14519.8	232.656
Brapa_ESTC049103	no_hits_f	---------	6.6526	1502.8	225.897
Brapa_ESTC013802	AT5G14740	CA2 (BETA CARBONIC ANHYDRASE 2)	38.5211	8063.83	209.335
Brapa_ESTC041578	no_hits_f	---------	86.7927	17882.8	206.04
Brapa_ESTC002681	no_hits_f	---------	175.036	29165.1	166.623
Brapa_ESTC010078	AT4G27360	Dynein light chain type 1 family protein	124.368	20072.6	161.397
Brapa_ESTC002391	no_hits_f	---------	197.189	27114.8	137.507
Brapa_ESTC010121	AT4G10300	RmlC-like superfamily protein	24.6588	3243.38	131.53
Brapa_ESTC042977	no_hits_f	---------	58.1578	7584.58	130.414
Brapa_ESTC051844	no_hits_f	---------	31.5718	3996.84	126.595
Brapa_ESTC048862	no_hits_f	---------	11.9184	1432.96	120.231
Brapa_ESTC004105	AT1G56190	Phosphoglycerate kinase, putative	26.0623	2970.83	113.99
Brapa_ESTC048850	no_hits_f	---------	187.355	18359.2	97.9915
Brapa_ESTC048809	no_hits_f	---------	168.136	16361	97.3081
Brapa_ESTC011275	AT3G58210	Meprin and TRAF homology domain-containing protein	184.58	17762.8	96.2336
Brapa_ESTC000252	AT4G37925	NAD(P)H:PLASTOQUINONE DEHYDROGENASE COMPLEX)	104.927	8814.84	84.0093
Brapa_ESTC049305	no_hits_f	---------	100.028	8073.46	80.712
Brapa_ESTC051843	no_hits_f	---------	98.0062	7790.54	79.4903
Brapa_ESTC050737	AT3G44790	Meprin and TRAF homology domain-containing protein	356.531	27433.1	76.9445
Brapa_ESTC002680	AT1G15980	Chloroplast NADH dehydrogenase complex	252.22	18224.2	72.2552
Brapa_ESTC028729	no_hits_f	---------	14.9919	1054.74	70.354
Brapa_ESTC023810	AT3G55630	Symbols: ATDFD | ATDFD (A. THALIANA DHFS-FPGS HOMOLOG D); tetrahydrofolylpolyglutamate synthase | chr3:20647764-20650374 FORWARD	24.1049	1659.15	68.8304
Brapa_ESTC050303	no_hits_f	---------	25.001	1666.64	66.6629
Brapa_ESTC002994	no_hits_f	---------	116.343	7751.69	66.6279
Brapa_ESTC000621	AT3G55800	Symbols: SBPASE | SBPASE (sedoheptulose-bisphosphatase); phosphoric ester hydrolase | chr3:20720619-20722400 FORWARD	113.671	6712.48	59.0518
Brapa_ESTC002102	AT2G14610	Symbols: PR-1, PR1 | PR1 (PATHOGENESIS-RELATED GENE 1) | chr2:6249026-6249511 REVERSE	120.056	6651.04	55.3995
Brapa_ESTC051549	AT5G53000	Symbols: TAP46 | TAP46 (2A PHOSPHATASE ASSOCIATED PROTEIN OF 46 KD) | chr5:21502880-21505095 REVERSE	27.4302	1445.31	52.6905
Brapa_ESTC009989	AT3G10450	Symbols: SCPL7 | SCPL7; serine carboxypeptidase | chr3:3249549-3252325 FORWARD	118.801	6253.27	52.6365
Brapa_ESTC022106	AT3G01500	Symbols: CA1 | CA1 (CARBONIC ANHYDRASE 1); carbonate dehydratase/ zinc ion binding | chr3:195180-196723 REVERSE	311.013	16365.7	52.6206
Brapa_ESTC042390	AT2G14610	Symbols: PR-1, PR1 | PR1 (PATHOGENESIS-RELATED GENE 1) | chr2:6249026-6249511 REVERSE	173.582	8905.46	51.3041
Brapa_ESTC002699	AT2G39470	Symbols: | photosystem II reaction center PsbP family protein | chr2:16483413-16484731 FORWARD	287.304	14585.4	50.7664
Brapa_ESTC002879	AT1G69523	Symbols: | UbiE/COQ5 methyltransferase family protein | chr1:26133490-26134820 FORWARD	403.893	20353.1	50.3923
Brapa_ESTC036951	no_hits_f	---------	173.067	8609.99	49.7495
Brapa_ESTC026638	AT1G68010	Symbols: HPR | HPR (Hydroxypyruvate reductase); NAD binding / cofactor binding / oxidoreductase, acting on the CH-OH group of donors, NAD or NADP as acceptor | chr1:25497081-25499383 FORWARD	36.3661	1796.7	49.4059
Brapa_ESTC007593	AT5G14740	Symbols: CA18, BETA CA2, CA2 | CA2 (BETA CARBONIC ANHYDRASE 2); carbonate dehydratase/ zinc ion binding | chr5:4760539-4762385 FORWARD	378.646	17651.5	46.6174
Brapa_ESTC006582	AT5G14740	Symbols: CA18, BETA CA2, CA2 | CA2 (BETA CARBONIC ANHYDRASE 2); carbonate dehydratase/ zinc ion binding | chr5:4760539-4762385 FORWARD	268.402	12157	45.294
Brapa_ESTC005593	AT1G18730	Symbols: | similar to Os02g0744000 [Oryza sativa (japonica cultivar-group)] (GB:NP_001048099.1) | chr1:6460617-6462098 FORWARD	344.78	15510.4	44.9864
Brapa_ESTC019968	AT5G02120	Symbols: OHP | OHP (ONE HELIX PROTEIN) | chr5:419141-419630 FORWARD	282.472	12518.3	44.317
Brapa_ESTC002008	no_hits_f	---------	444.923	19448.4	43.7118
Brapa_ESTC002504	no_hits_f	---------	111.895	4819.83	43.0746
Brapa_ESTC000751	AT1G14700	Symbols: PAP3, ATPAP3 | ATPAP3/PAP3 (purple acid phosphatase 3); acid phosphatase/ protein serine/threonine phosphatase | chr1:5058675-5060983 FORWARD	103.09	4326.04	41.9637
Brapa_ESTC016593	AT4G35450	Symbols: AFT, AKR2 | AKR2 (ANKYRIN REPEAT-CONTAINING PROTEIN 2); protein binding | chr4:16839867-16841764 FORWARD	227.748	9497.31	41.701
Brapa_ESTC013704	AT5G52100	Symbols: | dihydrodipicolinate reductase family protein | chr5:21187429-21189333 FORWARD	462.694	18255.2	39.4542
Brapa_ESTC000939	AT4G39710	Symbols: | immunophilin, putative / FKBP-type peptidyl-prolyl cis-trans isomerase, putative | chr4:18427243-18428319 REVERSE	222.085	8684.77	39.1056
Brapa_ESTC048903	no_hits_f	---------	403.911	15662.7	38.7776
Brapa_ESTC010456	AT5G52100	Symbols: | dihydrodipicolinate reductase family protein | chr5:21187429-21189333 FORWARD	428.069	16368.7	38.2385
Brapa_ESTC006419	AT3G10450	Symbols: SCPL7 | SCPL7; serine carboxypeptidase | chr3:3249775-3252325 FORWARD	112.953	4251.39	37.6386
Brapa_ESTC036155	AT1G72610	Symbols: GLP1 | GLP1 (GERMIN-LIKE PROTEIN 1); manganese ion binding / metal ion binding / nutrient reservoir | chr1:27342964-27343590 REVERSE	259.6	9761.47	37.602
Brapa_ESTC048717	no_hits_f	---------	51.7276	1871.12	36.1726
Brapa_ESTC010556	AT5G20630	Symbols: GLP3A, GLP3B, GLP3 | GLP3 (GERMIN-LIKE PROTEIN 3); manganese ion binding / metal ion binding / nutrient reservoir | chr5:6975317-6975952 REVERSE	153.055	5507.88	35.9863
Brapa_ESTC014415	AT1G77122	Symbols: | similar to unknown protein [Arabidopsis thaliana] (TAIR:AT1G69210.1); similar to Os04g0438300 [Oryza sativa (japonica cultivar-group)] (GB:NP_001052862.1); similar to H0315A08.11 [Oryza sativa (indica cultivar-group)] (GB:CAH67581.1); contains InterPro domain Protein of unknown function DUF150; (InterPro:IPR003728) | chr1:28982321-28983568 REVERSE	68.6313	2452.09	35.7285
Brapa_ESTC051911	AT2G31530	Symbols: EMB2289, SCY2 | EMB2289/SCY2 (EMBRYO DEFECTIVE 2289, SECY HOMOLOG 2); protein translocase | chr2:13434485-13437385 FORWARD	33.1627	1181.52	35.628
Brapa_ESTC049863	no_hits_f	---------	88.7845	3069.05	34.5674
Brapa_ESTC028641	no_hits_f	---------	58.3782	2001.04	34.2772
Brapa_ESTC012938	AT1G01080	Symbols: | 33 kDa ribonucleoprotein, chloroplast, putative / RNA-binding protein cp33, putative | chr1:45503-46789 REVERSE	186.128	6281.75	33.7496
Brapa_ESTC029406	no_hits_f	---------	79.0181	2641.64	33.4308
Brapa_ESTC048861	no_hits_f	---------	320.473	10640.9	33.2037
Brapa_ESTC048904	no_hits_f	---------	211.488	6873.13	32.4989
Brapa_ESTC029398	AT2G31530	Symbols: EMB2289, SCY2 | EMB2289/SCY2 (EMBRYO DEFECTIVE 2289, SECY HOMOLOG 2); protein translocase | chr2:13434485-13437385 FORWARD	397.991	12914.8	32.45
Brapa_ESTC000272	AT3G01500	Symbols: CA1 | CA1 (CARBONIC ANHYDRASE 1); carbonate dehydratase/ zinc ion binding | chr3:195180-196723 REVERSE	245.274	7816.25	31.8674
Brapa_ESTC029013	AT1G26580	Symbols: | similar to myb family transcription factor / ELM2 domain-containing protein [Arabidopsis thaliana] (TAIR:AT2G03470.1); similar to Os03g0425800 [Oryza sativa (japonica cultivar-group)] (GB:NP_001050406.1); similar to expressed protein [Oryza sativa (japonica cultivar-group)] (GB:AAS07212.1) | chr1:9185607-9187200 FORWARD	138.987	4359.39	31.3655
Brapa_ESTC050040	no_hits_f	---------	33.0564	1032.97	31.2487
Brapa_ESTC002503	AT5G45680	Symbols: | FK506-binding protein 1 (FKBP13) | chr5:18548121-18549355 FORWARD	90.4545	2809.5	31.0598
Brapa_ESTC029348	no_hits_f	---------	71.8189	2187.08	30.4527
Brapa_ESTC045302	no_hits_f	---------	297.453	9027.25	30.3485
Brapa_ESTC016202	AT5G42760	Symbols: | similar to hypothetical protein [Oryza sativa (japonica cultivar-group)] (GB:AAN65019.1); contains InterPro domain O-methyltransferase, N-terminal; (InterPro:IPR003455); contains InterPro domain Protein of unknown function Mtu_121; (InterPro:IPR011610) | chr5:17166181-17167333 FORWARD	144.506	4369.73	30.2391
Brapa_ESTC004197	AT1G50730	Symbols: | similar to hypothetical protein DDBDRAFT_0217150 [Dictyostelium discoideum AX4] (GB:XP_644589.1); contains domain ESOPHAGEAL CANCER ASSOCIATED PROTEIN (PTHR13673) | chr1:18798943-18806931 FORWARD	50.6004	1525.25	30.143
Brapa_ESTC051512	AT4G17900	Symbols: | zinc-binding family protein | chr4:9946059-9947710 FORWARD	363.081	10508	28.9412
Brapa_ESTC013724	AT4G09010	Symbols: APX4 | APX4 (ASCORBATE PEROXIDASE 4); peroxidase | chr4:5777499-5779335 REVERSE	437.791	12439.7	28.4147
Brapa_ESTC004334	AT1G18730	Symbols: | similar to Os02g0744000 [Oryza sativa (japonica cultivar-group)] (GB:NP_001048099.1) | chr1:6460617-6462098 FORWARD	222.513	6302.04	28.3221
Brapa_ESTC025276	AT1G30320	Symbols: | remorin family protein | chr1:10680330-10682834 FORWARD	200.56	5578.74	27.8158
Brapa_ESTC023800	AT5G14740	Symbols: CA18, BETA CA2, CA2 | CA2 (BETA CARBONIC ANHYDRASE 2); carbonate dehydratase/ zinc ion binding | chr5:4760539-4762385 FORWARD	218.9	6012.08	27.465
Brapa_ESTC050134	no_hits_f	---------	321.355	8777.89	27.3152
Brapa_ESTC009534	AT1G70820	Symbols: | phosphoglucomutase, putative / glucose phosphomutase, putative | chr1:26709256-26711696 FORWARD	67.9389	1807.12	26.5992
Brapa_ESTC051084	no_hits_f	---------	89.8578	2194.31	24.4198
Brapa_ESTC014463	AT4G34090	Symbols: | similar to unknown protein [Arabidopsis thaliana] (TAIR:AT2G23370.1); similar to Hypothetical protein [Oryza sativa (japonica cultivar-group)] (GB:AAN61482.1); similar to Os03g0109700 [Oryza sativa (japonica cultivar-group)] (GB:NP_001048710.1); contains domain TPR-like (SSF48452) | chr4:16328056-16330115 REVERSE	477.419	11640.3	24.3817
Brapa_ESTC022580	AT3G56290	Symbols: | similar to Os01g0823600 [Oryza sativa (japonica cultivar-group)] (GB:NP_001044661.1); similar to unnamed protein product [Ostreococcus tauri] (GB:CAL58546.1) | chr3:20889722-20890520 REVERSE	102.907	2481	24.1091
Brapa_ESTC020259	AT3G01440	Symbols: | oxygen evolving enhancer 3 (PsbQ) family protein | chr3:168485-169414 FORWARD	47.4982	1130.22	23.795
Brapa_ESTC019779	AT5G52100	Symbols: | dihydrodipicolinate reductase family protein | chr5:21187429-21189333 FORWARD	428.105	10158.3	23.7285
Brapa_ESTC039936	no_hits_f	---------	75.076	1749.27	23.3
Brapa_ESTC013370	AT4G09350	Symbols: | DNAJ heat shock N-terminal domain-containing protein | chr4:5931314-5932149 REVERSE	298.826	6781.81	22.6948
Brapa_ESTC035004	AT1G15860	| Symbols: | calcium ion binding | chr1:5455050-5456735 FORWARD	497.587	11041.6	22.1903
Brapa_ESTC047771	no_hits_f	---------	117.436	2583.96	22.0031
Brapa_ESTC021036	AT1G01080	Symbols: | 33 kDa ribonucleoprotein, chloroplast, putative / RNA-binding protein cp33, putative | chr1:45503-46789 REVERSE	386.893	8384.39	21.6711
Brapa_ESTC031870	AT1G72730	Symbols: | eukaryotic translation initiation factor 4A, putative / eIF-4A, putative | chr1:27381702-27383255 REVERSE	83.1762	1802.11	21.6662
Brapa_ESTC028491	AT1G14700	Symbols: PAP3, ATPAP3 | ATPAP3/PAP3 (purple acid phosphatase 3) | chr1:5058675-5060983 FORWARD	141.052	3018.13	21.3973
Brapa_ESTC048855	no_hits_f	---------	189.255	3946.85	20.8547
Brapa_ESTC035530	AT3G55800	Symbols: SBPASE | SBPASE (sedoheptulose-bisphosphatase); phosphoric ester hydrolase | chr3:20720619-20722400 FORWARD	323.889	6674.02	20.6059
Brapa_ESTC051922	no_hits_f	---------	196.631	4048.47	20.5892
Brapa_ESTC020545	AT5G40230	| Symbols: | nodulin-related | chr5:16097042-16098963 REVERSE	262.053	5366.91	20.4802
Brapa_ESTC050133	no_hits_f	---------	229.95	4704.58	20.4591
Brapa_ESTC029601	no_hits_f	---------	71.534	1444.76	20.1968
Brapa_ESTC002146	AT2G16760	Symbols: | similar to unknown protein [Arabidopsis thaliana] (TAIR:AT2G47370.1); similar to Os03g0307400 [Oryza sativa (japonica cultivar-group)] (GB:NP_001049896.1); similar to Os10g0443000 [Oryza sativa (japonica cultivar-group)] (GB:NP_001064702.1); similar to hypothetical protein LOC_Os10g30620 [Oryza sativa (japonica cultivar-group)] (GB:AAP53978.2); contains InterPro domain Soluble quinopro…	65.2798	1312.79	20.1102
Brapa_ESTC002772	AT3G14650	Symbols: CYP72A11 | CYP72A11 (cytochrome P450, family 72, subfamily A, polypeptide 11); oxygen binding | chr3:4922213-4924172 FORWARD	254.456	5058.91	19.8813
Brapa_ESTC004133	AT2G28430	Symbols: | similar to unknown [Hyacinthus orientalis] (GB:AAT08697.1) | chr2:12166813-12167464 REVERSE	79.7145	1547.51	19.4132
Brapa_ESTC005600	AT5G01750	Symbols: | Identical to Protein At5g01750 [Arabidopsis Thaliana] (GB:Q9LZX1;GB:Q8LEK9); similar to unknown protein [Arabidopsis thaliana] (TAIR:AT3G11740.1); similar to Protein of unknown function DUF567 [Medicago truncatula] (GB:ABE88873.1); contains InterPro domain Protein of unknown function DUF567; (InterPro:IPR007612) | chr5:290031-291106 FORWARD	339.791	6586.86	19.385
Brapa_ESTC027205	AT5G56850	Symbols: | similar to unknown protein [Arabidopsis thaliana] (TAIR:AT2G22795.1); similar to GA14882-PA [Drosophila pseudoobscura] (GB:EAL32833.1) | chr5:23002658-23004237 REVERSE	114.1	2206.22	19.3358
Brapa_ESTC034154	AT3G15310	Symbols: | similar to unknown protein [Arabidopsis thaliana] (TAIR:AT5G32621.1); similar to hypothetical protein 24.t00017 [Brassica oleracea] (GB:ABD64939.1); contains InterPro domain Protein of unknown function DUF635; (InterPro:IPR006912); contains InterPro domain Bacterial adhesion; (InterPro:IPR008966) | chr3:5152289-5153536 REVERSE	178.832	3433.54	19.1998
Brapa_ESTC006258	AT3G57240	Symbols: BG3 | BG3 (BETA-1,3-GLUCANASE 3); hydrolase, hydrolyzing O-glycosyl compounds | chr3:21192895-21194024 REVERSE	168.118	3164.57	18.8235
Brapa_ESTC005814	AT2G19800	Symbols: MIOX2 | MIOX2 (MYO-INOSITOL OXYGENASE 2) | chr2:8538188-8540436 REVERSE	62.3061	1151.18	18.4762
Brapa_ESTC001957	AT3G55800	Symbols: SBPASE | SBPASE (sedoheptulose-bisphosphatase); phosphoric ester hydrolase | chr3:20720619-20722400 FORWARD	346.392	6384.21	18.4306
Brapa_ESTC000639	AT5G15230	Symbols: GASA4 | GASA4 (GAST1 PROTEIN HOMOLOG 4) | chr5:4945020-4946028 FORWARD	94.701	1710.35	18.0605
Brapa_ESTC035168	no_hits_f	---------	217.786	3868.99	17.7651
Brapa_ESTC048711	no_hits_f	---------	79.488	1399.76	17.6097
Brapa_ESTC024558	AT3G25520	Symbols: ATL5 | ATL5 (A. THALIANA RIBOSOMAL PROTEIN L5); structural constituent of ribosome | chr3:9270810-9272564 REVERSE	398.286	6925.73	17.3888
Brapa_ESTC003714	no_hits_f	---------	446.578	7751.97	17.3586
Brapa_ESTC047526	AT3G55800	Symbols: SBPASE | SBPASE (sedoheptulose-bisphosphatase); phosphoric ester hydrolase | chr3:20720619-20722400 FORWARD	440.323	7571.65	17.1957
Brapa_ESTC016509	AT4G00752	Symbols: | UBX domain-containing protein | chr4:317771-320793 REVERSE	108.937	1832.77	16.8241
Brapa_ESTC036064	no_hits_f	---------	167.424	2806.12	16.7606
Brapa_ESTC049864	no_hits_f	---------	148.473	2485.32	16.7392
Brapa_ESTC003354	AT1G29670	Symbols: | GDSL-motif lipase/hydrolase family protein | chr1:10375829-10377703 FORWARD	457.638	7610.58	16.6301
Brapa_ESTC013161	AT1G51200	Symbols: | DNA binding / zinc ion binding | chr1:18989358-18989879 FORWARD	160.843	2673.74	16.6233
Brapa_ESTC013929	AT3G01500	Symbols: CA1 | CA1 (CARBONIC ANHYDRASE 1); carbonate dehydratase/ zinc ion binding | chr3:194860-197880 REVERSE	259.471	4296.41	16.5583
Brapa_ESTC022926	AT3G16250	| Symbols: | ferredoxin-related | chr3:5507097-5508326 REVERSE	230.566	3812.44	16.5351
Brapa_ESTC011158	AT2G35130	Symbols: | pentatricopeptide (PPR) repeat-containing protein | chr2:14814668-14817243 REVERSE	81.8625	1330.67	16.2549
Brapa_ESTC026648	AT1G14150	Symbols: | oxygen evolving enhancer 3 (PsbQ) family protein | chr1:4839882-4840629 FORWARD	230.921	3710.38	16.0677
Brapa_ESTC013919	no_hits_f	---------	176.766	2815.67	15.9288
Brapa_ESTC013093	AT3G01440	Symbols: | oxygen evolving enhancer 3 (PsbQ) family protein | chr3:168485-169414 FORWARD	107.668	1691.19	15.7075
Brapa_ESTC001756	AT1G07660	| Symbols: | histone H4 | chr1:2369209-2369520 FORWARD	308.806	4792.32	15.5189
Brapa_ESTC049075	AT1G27910	Symbols: | U-box domain-containing protein | chr1:9720949-9723962 REVERSE	112.974	1748.61	15.478
Brapa_ESTC048867	no_hits_f	---------	289.694	4440.2	15.3272
Brapa_ESTC001920	AT2G40100	Symbols: LHCB4.3 | LHCB4.3 (LIGHT HARVESTING COMPLEX PSII); chlorophyll binding | chr2:16752962-16754268 FORWARD	66.0485	1011.44	15.3136
Brapa_ESTC006599	AT3G14770	Symbols: | nodulin MtN3 family protein | chr3:4957794-4959209 REVERSE	83.7599	1280.19	15.284
Brapa_ESTC036360	no_hits_f	---------	487.574	7418.32	15.2148
Brapa_ESTC016708	AT1G22700	Symbols: | tetratricopeptide repeat (TPR)-containing protein | chr1:8028312-8029867 REVERSE	304.688	4630.24	15.1967
Brapa_ESTC036076	AT3G10450	Symbols: SCPL7 | SCPL7; serine carboxypeptidase | chr3:3249775-3252325 FORWARD	393.907	5981.7	15.1856
Brapa_ESTC023676	AT3G56290	Symbols: | similar to Os01g0823600 [Oryza sativa (japonica cultivar-group)] (GB:NP_001044661.1); similar to unnamed protein product [Ostreococcus tauri] (GB:CAL58546.1) | chr3:20889722-20890520 REVERSE	80.2295	1208.58	15.064
Brapa_ESTC036290	AT3G15930	Symbols: | pentatricopeptide (PPR) repeat-containing protein | chr3:5387450-5389696 FORWARD	75.8051	1130.21	14.9094
Brapa_ESTC026931	AT5G16030	Symbols: | similar to unknown protein [Arabidopsis thaliana] (TAIR:AT3G02500.1); similar to hypothetical protein [Cleome spinosa] (GB:ABD96956.1) | chr5:5238245-5240581 FORWARD	436.424	6498.72	14.8908
Brapa_ESTC005592	AT2G42910	Symbols: | ribose-phosphate pyrophosphokinase 4 / phosphoribosyl diphosphate synthetase 4 (PRS4) | chr2:17863473-17865471 FORWARD	105.455	1568.53	14.8739
Brapa_ESTC013902	AT4G37925	Symbols: NDH-M | NDH-M (SUBUNIT NDH-M OF NAD(P)H:PLASTOQUINONE DEHYDROGENASE COMPLEX) | chr4:17830742-17831479 REVERSE	380.972	5500.44	14.4379
Brapa_ESTC018314	AT2G40280	Symbols: | dehydration-responsive family protein | chr2:16832785-16835378 REVERSE	369.767	5327.91	14.4088
Brapa_ESTC022142	AT3G23760	Symbols: | similar to transferase, transferring glycosyl groups [Arabidopsis thaliana] (TAIR:AT4G14100.1); similar to conserved hypothetical protein [Medicago truncatula] (GB:ABE80211.1); contains domain Cystatin/monellin (SSF54403) | chr3:8562972-8564647 REVERSE	102.444	1465.53	14.3057
Brapa_ESTC003316	AT4G39300	Symbols: | similar to unknown protein [Arabidopsis thaliana] (TAIR:AT3G13674.1); similar to conserved hypothetical protein [Medicago truncatula] (GB:ABE82724.1) | chr4:18286829-18287817 FORWARD	80.6542	1148.68	14.242
Brapa_ESTC011620	AT5G52970	Symbols: | thylakoid lumen 15.0 kDa protein | chr5:21496846-21498244 FORWARD	456.404	6459.72	14.1535
Brapa_ESTC005627	AT1G56140	Symbols: | leucine-rich repeat family protein / protein kinase family protein | chr1:21005373-21011390 REVERSE	192.228	2713.06	14.1138
Brapa_ESTC007443	AT2G34860	Symbols: EDA3 | EDA3 (embryo sac development arrest 3) | chr2:14715459-14716883 FORWARD	355.158	4972.84	14.0018
Brapa_ESTC048871	no_hits_f	---------	167.725	2329.99	13.8917
Brapa_ESTC020737	AT3G55630	Symbols: ATDFD | ATDFD (A. THALIANA DHFS-FPGS HOMOLOG D); tetrahydrofolylpolyglutamate synthase | chr3:20647764-20650374 FORWARD	323.159	4432.02	13.7147
Brapa_ESTC029752	AT4G14390	Symbols: | ankyrin repeat family protein | chr4:8289640-8292079 FORWARD	74.1727	1004.83	13.5472
Brapa_ESTC051425	no_hits_f	---------	356.724	4796.11	13.4449
Brapa_ESTC023023	AT5G28750	Symbols: | thylakoid assembly protein, putative | chr5:10784146-10785681 REVERSE	332.852	4398.91	13.2158
Brapa_ESTC025730	AT1G02500	Symbols: SAM-1, MAT1, SAM1 | SAM1 (S-adenosylmethionine synthetase 1); methionine adenosyltransferase | chr1:519037-520218 FORWARD	100.317	1313.17	13.0902
Brapa_ESTC012459	AT1G62770	Symbols: | invertase/pectin methylesterase inhibitor family protein | chr1:23249750-23250501 REVERSE	179.523	2335.47	13.0093
Brapa_ESTC031484	no_hits_f	---------	265.824	3455.84	13.0005
Brapa_ESTC004214	AT5G55210	Symbols: | similar to unknown protein [Arabidopsis thaliana] (TAIR:AT4G22320.1); similar to conserved hypothetical protein [Medicago truncatula] (GB:ABD28485.1) | chr5:22413933-22414600 REVERSE	131.053	1691.19	12.9046
Brapa_ESTC037603	AT3G05625	| Symbols: | binding | chr3:1632414-1633918 FORWARD	179.73	2315.22	12.8817
Brapa_ESTC002232	AT2G19760	Symbols: PFN1, PRF1 | PFN1/PRF1 (PROFILIN 1); actin binding | chr2:8524156-8525149 REVERSE	105.897	1340.97	12.663
Brapa_ESTC048712	no_hits_f	---------	104.568	1321.49	12.6376
Brapa_ESTC051749	no_hits_f	---------	195.028	2452.17	12.5734
Brapa_ESTC035536	AT3G56220	Symbols: | similar to unknown protein [Arabidopsis thaliana] (TAIR:AT2G40435.1); similar to Os03g0338400 [Oryza sativa (japonica cultivar-group)] (GB:NP_001050055.1); similar to hypothetical protein [Oryza sativa (japonica cultivar-group)] (GB:BAC10078.1); contains InterPro domain Helix-loop-helix DNA-binding; (InterPro:IPR011598) | chr3:20869920-20871281 FORWARD	418.031	5250.67	12.5605
Brapa_ESTC025847	AT5G08130	Symbols: BIM1 | BIM1 (BES1-interacting Myc-like protein 1); DNA binding / transcription factor | chr5:2606656-2608653 REVERSE	280.473	3517.45	12.5411
Brapa_ESTC002949	AT1G70760	Symbols: | inorganic carbon transport protein-related | chr1:26690929-26691863 FORWARD	457.906	5721.16	12.4942
Brapa_ESTC036555	AT1G55480	Symbols: | binding / protein binding | chr1:20717488-20719017 FORWARD	397.901	4923.48	12.3736
Brapa_ESTC006452	AT2G41940	Symbols: ZFP8 | ZFP8 (ZINC FINGER PROTEIN 8); nucleic acid binding / transcription factor/ zinc ion binding | chr2:17514634-17515407 FORWARD	268.643	3322.53	12.3678
Brapa_ESTC005164	AT4G27657	Symbols: | similar to unknown protein [Arabidopsis thaliana] (TAIR:AT4G27652.1) | chr4:13813130-13813318 FORWARD	92.2659	1132.4	12.2732
Brapa_ESTC051021	no_hits_f	---------	143.663	1732.07	12.0565
Brapa_ESTC048985	no_hits_f	---------	405.468	4883.6	12.0444
Brapa_ESTC022742	AT2G23000	Symbols: SCPL10 | SCPL10 (serine carboxypeptidase-like 10); serine carboxypeptidase | chr2:9799364-9802821 FORWARD	89.1578	1069.4	11.9945
Brapa_ESTC030697	no_hits_f	---------	100.749	1207.84	11.9886
Brapa_ESTC018741	AT3G48200	Symbols: | similar to Os05g0594500 [Oryza sativa (japonica cultivar-group)] (GB:NP_001056507.1); similar to IMP dehydrogenase/GMP reductase [Medicago truncatula] (GB:ABE93579.1); contains domain gb def: Hypothetical protein At3g48200 (PTHR12326:SF1); contains domain UNCHARACTERIZED (PTHR12326) | chr3:17843934-17848356 REVERSE	361.858	4293.33	11.8647
Brapa_ESTC003796	AT1G22690	Symbols: | gibberellin-responsive protein, putative | chr1:8027317-8027950 FORWARD	139.676	1656.99	11.8631
Brapa_ESTC014286	AT5G22800	Symbols: | aminoacyl-tRNA synthetase family protein | chr5:7616224-7619964 REVERSE	483.285	5698.41	11.791
Brapa_ESTC002910	AT2G43570	| Symbols: | chitinase, putative | chr2:18083466-18084512 REVERSE	129.592	1521.05	11.7372
Brapa_ESTC006903	AT4G01460	Symbols: | basic helix-loop-helix (bHLH) family protein | chr4:621334-622697 FORWARD	103.945	1219.94	11.7364
Brapa_ESTC026840	AT1G06550	Symbols: | enoyl-CoA hydratase/isomerase family protein | chr1:2003833-2006563 REVERSE	126.582	1480.47	11.6957
Brapa_ESTC002380	AT1G72610	Symbols: GLP1 | GLP1 (GERMIN-LIKE PROTEIN 1); manganese ion binding / metal ion binding / nutrient reservoir | chr1:27342964-27343590 REVERSE	105.024	1203.54	11.4597
Brapa_ESTC020718	AT1G25460	Symbols: | oxidoreductase family protein | chr1:8942798-8944231 FORWARD	230.292	2610.36	11.335
Brapa_ESTC019580	AT1G60590	Symbols: | polygalacturonase, putative / pectinase, putative | chr1:22318091-22320532 REVERSE	393.012	4435.13	11.285
Brapa_ESTC029472	AT2G43560	Symbols: | immunophilin / FKBP-type peptidyl-prolyl cis-trans isomerase family protein | chr2:18081072-18082462 REVERSE	256.359	2885.4	11.2553
Brapa_ESTC002295	AT1G56500	Symbols: | haloacid dehalogenase-like hydrolase family protein | chr1:21163440-21170757 FORWARD	421.914	4733.5	11.2191
Brapa_ESTC028627	AT1G60600	Symbols: ABC4 | ABC4 (ABERRANT CHLOROPLAST DEVELOPMENT 4); 1,4-dihydroxy-2-naphthoate octaprenyltransferase/ prenyltransferase | chr1:22328472-22330060 REVERSE	397.694	4451.12	11.1923
Brapa_ESTC002912	AT5G44520	Symbols: | ribose 5-phosphate isomerase-related | chr5:17951837-17953668 REVERSE	401.879	4431.83	11.0278
Brapa_ESTC025617	AT2G21370	Symbols: | xylulose kinase, putative | chr2:9144662-9146653 REVERSE	263.656	2890.31	10.9624
Brapa_ESTC021067	no_hits_f	---------	349.506	3803.76	10.8832
Brapa_ESTC010604	AT5G40230	| Symbols: | nodulin-related | chr5:16097042-16098963 REVERSE	186.484	2022.44	10.8451
Brapa_ESTC006516	AT3G19800	Symbols: | similar to conserved hypothetical protein [Medicago truncatula] (GB:ABE78177.1) | chr3:6876159-6877477 FORWARD	458.197	4961.34	10.828
Brapa_ESTC040067	AT1G26760	Symbols: | SET domain-containing protein | chr1:9248291-9251590 REVERSE	310.238	3357.64	10.8228
Brapa_ESTC051519	no_hits_f	---------	326.534	3494.12	10.7006
Brapa_ESTC019040	no_hits_f	---------	153.333	1623.05	10.5851
Brapa_ESTC015835	AT5G39020	Symbols: | protein kinase family protein | chr5:15634147-15636588 FORWARD	208.044	2114.38	10.1631
Brapa_ESTC035076	AT3G57700	Symbols: | protein kinase, putative | chr3:21395894-21396916 FORWARD	212.949	2163.29	10.1587
Brapa_ESTC022711	AT4G38860	Symbols: | auxin-responsive protein, putative | chr4:18130351-18130668 FORWARD	263.194	2668.99	10.1408
Brapa_ESTC047867	AT5G45670	Symbols: | GDSL-motif lipase/hydrolase family protein | chr5:18545827-18547391 FORWARD	420.942	4260.81	10.1221
Brapa_ESTC004757	AT3G44450	Symbols: | similar to unknown protein [Arabidopsis thaliana] (TAIR:AT3G52740.1); similar to H0717B12.8 [Oryza sativa (indica cultivar-group)] (GB:CAH67161.1) | chr3:16085215-16085565 REVERSE	372.2	3722.68	10.0018
Brapa_ESTC008351	AT1G07180	Symbols: ATNDI1, NDA1 | NDA1 (ALTERNATIVE NAD(P)H DEHYDROGENASE 1); NADH dehydrogenase | chr1:2204413-2206772 FORWARD	292.563	2910.42	9.94801
Brapa_ESTC010208	AT4G17050	| Symbols: | transcription factor | chr4:9589681-9592432 FORWARD	254.534	2531.65	9.94622
Brapa_ESTC037622	AT1G08800	Symbols: | similar to unknown protein [Arabidopsis thaliana] (TAIR:AT2G30690.1); similar to Os10g0414800 [Oryza sativa (japonica cultivar-group)] (GB:NP_001064597.1); similar to Os01g0775200 [Oryza sativa (japonica cultivar-group)] (GB:NP_001044407.1); similar to Hypothetical protein [Oryza sativa (japonica cultivar-group)] (GB:AAM15784.1); contains InterPro domain Protein of unknown function DUF…	372.028	3674.8	9.87775
Brapa_ESTC007846	AT2G04039	Symbols: | similar to unknown protein [Oryza sativa (japonica cultivar-group)] (GB:BAC84849.1) | chr2:1333461-1334435 FORWARD	414.358	4023.33	9.70979
Brapa_ESTC009417	AT1G55370	Symbols: | similar to unknown protein [Arabidopsis thaliana] (TAIR:AT1G64770.1); similar to Os03g0748300 [Oryza sativa (japonica cultivar-group)] (GB:NP_001051267.1); similar to Os03g0158300 [Oryza sativa (japonica cultivar-group)] (GB:NP_001049021.1); similar to Hypothetical protein [Oryza sativa (japonica cultivar-group)] (GB:AAN06836.1); contains InterPro domain Galactose mutarotase-like; (Int…	406.732	3927.58	9.65643
Brapa_ESTC010441	AT1G19150	Symbols: LHCA2*1, LHCA6 | LHCA6 (Photosystem I light harvesting complex gene 6); chlorophyll binding | chr1:6612797-6613790 FORWARD	262.268	2532.05	9.65444
Brapa_ESTC048443	no_hits_f	---------	198.81	1917.68	9.64579
Brapa_ESTC008431	AT5G27400	Symbols: | similar to unknown protein [Arabidopsis thaliana] (TAIR:AT1G73320.1); similar to hypothetical protein MtrDRAFT_AC150244g5v1 [Medicago truncatula] (GB:ABD32378.1); similar to Os05g0143200 [Oryza sativa (japonica cultivar-group)] (GB:NP_001054614.1); contains domain no description (G3D.3.40.50.150); contains domain S-adenosyl-L-methionine-dependent methyltransferases (SSF53335); contains…	164.081	1580.23	9.63079
Brapa_ESTC020645	AT1G14150	Symbols: | oxygen evolving enhancer 3 (PsbQ) family protein | chr1:4839882-4840629 FORWARD	188.833	1798.4	9.52376
Brapa_ESTC010211	AT1G20610	Symbols: CYCB2;3 | CYCB2;3 (CYCLIN B2;3); cyclin-dependent protein kinase regulator | chr1:7135063-7137263 REVERSE	267.171	2529.1	9.46622
Brapa_ESTC004869	no_hits_f	---------	385.082	3618.2	9.39592
Brapa_ESTC038853	no_hits_f	---------	175.341	1641.76	9.36324
Brapa_ESTC034674	AT5G57840	Symbols: | transferase family protein | chr5:23450171-23452387 REVERSE	185.522	1735.53	9.35485
Brapa_ESTC021154	AT3G03710	Symbols: RIF10 | RIF10 (RESISTANT TO INHIBITION WITH FSM 10); 3'-5'-exoribonuclease/ RNA binding / nucleic acid binding | chr3:919549-924913 FORWARD	165.96	1541.68	9.28947
Brapa_ESTC048214	no_hits_f	---------	181.102	1678.51	9.26831
Brapa_ESTC010840	AT1G72610	Symbols: GLP1 | GLP1 (GERMIN-LIKE PROTEIN 1); manganese ion binding / metal ion binding / nutrient reservoir | chr1:27342964-27343590 REVERSE	325.173	3000.19	9.22644
Brapa_ESTC039870	AT4G39140	Symbols: | protein binding / zinc ion binding | chr4:18229631-18231276 REVERSE	428.304	3926.9	9.16849
Brapa_ESTC001680	AT5G10480	Symbols: PEP, PAS2 | PAS2 (PASTICCINO 2) | chr5:3298048-3300049 REVERSE	272.509	2498.17	9.16729
Brapa_ESTC040404	AT1G69160	Symbols: | similar to unknown protein [Arabidopsis thaliana] (TAIR:AT3G13980.1) | chr1:26003978-26004943 FORWARD	413.221	3762.74	9.10588
Brapa_ESTC025665	AT5G02760	Symbols: | protein phosphatase 2C family protein / PP2C family protein | chr5:625375-626815 FORWARD	245.852	2225.45	9.05199
Brapa_ESTC028542	no_hits_f	---------	249.84	2257.63	9.0363
Brapa_ESTC005612	AT5G43745	Symbols: | phosphotransferase-related | chr5:17586662-17592181 REVERSE	112.158	1009	8.99624
Brapa_ESTC011050	AT5G09660	Symbols: PMDH2 | PMDH2 (PEROXISOMAL NAD-MALATE DEHYDROGENASE 2); malate dehydrogenase | chr5:2993646-2995552 REVERSE	425.944	3816.75	8.96068
Brapa_ESTC041458	AT2G32500	Symbols: | similar to unknown protein [Arabidopsis thaliana] (TAIR:AT2G31670.1); similar to Os03g0110900 [Oryza sativa (japonica cultivar-group)] (GB:NP_001048719.1); contains InterPro domain Stress responsive alpha-beta barrel; (InterPro:IPR013097) | chr2:13802448-13804197 REVERSE	487.215	4363.36	8.95572
Brapa_ESTC042417	AT3G01550	Symbols: | triose phosphate/phosphate translocator, putative | chr3:216954-218863 REVERSE	384.008	3431.79	8.93677
Brapa_ESTC002543	AT1G55480	Symbols: | binding / protein binding | chr1:20717488-20719017 FORWARD	120.858	1077.92	8.9189
Brapa_ESTC008438	AT2G23000	Symbols: SCPL10 | SCPL10 (serine carboxypeptidase-like 10); serine carboxypeptidase | chr2:9799364-9802821 FORWARD	167.133	1481.62	8.86492
Brapa_ESTC003854	AT3G11945	| Symbols: | prenyltransferase | chr3:3780047-3782886 REVERSE	325.146	2864.34	8.8094
Brapa_ESTC050979	no_hits_f	---------	178.762	1573.56	8.80254
Brapa_ESTC017490	AT5G26780	Symbols: SHM2 | SHM2 (SERINE HYDROXYMETHYLTRANSFERASE 2); glycine hydroxymethyltransferase | chr5:9418302-9421728 FORWARD	466.843	4033.52	8.63999
Brapa_ESTC035586	AT3G24450	Symbols: | copper-binding family protein | chr3:8880293-8881618 REVERSE	421.017	3613.44	8.58265
Brapa_ESTC041180	AT2G21220	Symbols: | auxin-responsive protein, putative | chr2:9096461-9096775 FORWARD	344.274	2947.94	8.56277
Brapa_ESTC011295	AT5G04380	Symbols: | S-adenosyl-L-methionine:carboxyl methyltransferase family protein | chr5:1234884-1236318 FORWARD	207.087	1756.44	8.48165
Brapa_ESTC045075	AT4G36530	Symbols: | hydrolase, alpha/beta fold family protein | chr4:17240123-17241773 REVERSE	474.795	4013.23	8.45255
Brapa_ESTC004927	AT2G43340	Symbols: | similar to unknown protein [Arabidopsis thaliana] (TAIR:AT2G31560.2); similar to hypothetical protein [Oryza sativa (japonica cultivar-group)] (GB:BAB86085.1); similar to Os11g0282300 [Oryza sativa (japonica cultivar-group)] (GB:NP_001067693.1); similar to Os12g0230600 [Oryza sativa (japonica cultivar-group)] (GB:NP_001066444.1); contains InterPro domain Protein of unknown function DUF…	246.799	2083.88	8.44363
Brapa_ESTC046050	AT5G45780	Symbols: | leucine-rich repeat transmembrane protein kinase, putative | chr5:18584173-18586852 REVERSE	159.843	1346.94	8.42664
Brapa_ESTC001731	AT5G67370	Symbols: | similar to unknown protein [Arabidopsis thaliana] (TAIR:AT5G11840.1); similar to Protein of unknown function DUF1230 [Medicago truncatula] (GB:ABE85761.1); contains InterPro domain Protein of unknown function DUF1230; (InterPro:IPR009631) | chr5:26894893-26896691 REVERSE	193.713	1625.24	8.38994
Brapa_ESTC049860	no_hits_f	---------	429.187	3594.84	8.37593
Brapa_ESTC006101	AT3G15115	Symbols: | similar to unknown protein [Arabidopsis thaliana] (TAIR:AT1G53180.1) | chr3:5086226-5087359 REVERSE	359.451	2993.8	8.32881
Brapa_ESTC051588	no_hits_f	---------	210.709	1752.21	8.31578
Brapa_ESTC005262	AT2G46330	Symbols: ATAGP16, AGP16 | AGP16 (ARABINOGALACTAN PROTEIN 16) | chr2:19025803-19026181 REVERSE	283.292	2352.23	8.3032
Brapa_ESTC015198	AT5G27470	Symbols: | seryl-tRNA synthetase / serine--tRNA ligase | chr5:9695090-9697157 FORWARD	292.418	2423.84	8.28896
Brapa_ESTC047188	AT2G19800	Symbols: MIOX2 | MIOX2 (MYO-INOSITOL OXYGENASE 2) | chr2:8538188-8540436 REVERSE	332.47	2753.08	8.28069
Brapa_ESTC034261	no_hits_f	---------	199.945	1640.66	8.20556
Brapa_ESTC030466	AT3G58430	Symbols: | similar to meprin and TRAF homology domain-containing protein / MATH domain-containing protein [Arabidopsis thaliana] (TAIR:AT3G58410.1); similar to MATH domain containing protein [Brassica oleracea] (GB:ABD65138.1); contains InterPro domain TRAF-like; (InterPro:IPR008974); contains InterPro domain MATH; (InterPro:IPR002083); contains InterPro domain TRAF-type; (InterPro:IPR013322) | c…	210.541	1726.39	8.19978
Brapa_ESTC051587	no_hits_f	---------	317.658	2600.05	8.18506
Brapa_ESTC009126	AT2G30570	Symbols: PSBW | photosystem II reaction center W (PsbW) protein-related | chr2:13026403-13027130 REVERSE	440.028	3567.73	8.10796
Brapa_ESTC016208	AT5G42760	Symbols: | similar to hypothetical protein [Oryza sativa (japonica cultivar-group)] (GB:AAN65019.1); contains InterPro domain O-methyltransferase, N-terminal; (InterPro:IPR003455); contains InterPro domain Protein of unknown function Mtu_121; (InterPro:IPR011610) | chr5:17166181-17167333 FORWARD	183.453	1484.57	8.09237
Brapa_ESTC038406	AT4G17360	Symbols: | formyltetrahydrofolate deformylase, putative | chr4:9703710-9705480 REVERSE	456.417	3689.78	8.08423
Brapa_ESTC025525	AT4G15030	Symbols: | similar to unknown protein [Arabidopsis thaliana] (TAIR:AT1G56660.1); similar to Phyb1 [Pimpinella brachycarpa] (GB:AAC31614.1); contains domain ACID PHOSPHATASE-RELATED (PTHR11567); contains domain UNCHARACTERIZED (PTHR11567:SF1) | chr4:8579543-8581175 FORWARD	214.331	1726.11	8.05348
Brapa_ESTC020742	AT5G22920	Symbols: | zinc finger (C3HC4-type RING finger) family protein | chr5:7665146-7667034 FORWARD	397.834	3195.46	8.03214
Brapa_ESTC002993	AT3G06880	Symbols: | transducin family protein / WD-40 repeat family protein | chr3:2169862-2175692 REVERSE	227.62	1824.35	8.01489
Brapa_ESTC050039	no_hits_f	---------	404.103	3237.16	8.01073
Brapa_ESTC011795	no_hits_f	---------	129.785	1038.62	8.00262
Brapa_ESTC014478	no_hits_f	---------	257.761	2044.11	7.93025
Brapa_ESTC001062	AT2G40670	Symbols: RR16, ARR16 | ARR16 (response regulator 16); transcription regulator/ two-component response regulator | chr2:16977336-16978198 FORWARD	170.86	1354.8	7.9293
Brapa_ESTC011971	AT1G53520	Symbols: | chalcone-flavanone isomerase-related | chr1:19980153-19981583 REVERSE	256.348	2005.59	7.8237
Brapa_ESTC008607	AT2G41790	Symbols: | peptidase M16 family protein / insulinase family protein | chr2:17436531-17443188 REVERSE	281.23	2185.14	7.76994
Brapa_ESTC051185	AT4G31040	Symbols: | proton extrusion protein-related | chr4:15111817-15113887 REVERSE	266.497	2070.31	7.76861
Brapa_ESTC010762	AT5G05580	Symbols: SH1, FAD8 | FAD8 (FATTY ACID DESATURASE 8); omega-3 fatty acid desaturase | chr5:1664332-1666346 FORWARD	151.755	1177.44	7.75882
Brapa_ESTC022678	AT3G56290	Symbols: | similar to Os01g0823600 [Oryza sativa (japonica cultivar-group)] (GB:NP_001044661.1); similar to unnamed protein product [Ostreococcus tauri] (GB:CAL58546.1) | chr3:20889722-20890520 REVERSE	213.504	1651.45	7.73498
Brapa_ESTC021964	AT1G28110	Symbols: SCPL45 | SCPL45; serine carboxypeptidase | chr1:9804140-9806819 REVERSE	206.732	1585.57	7.66969
Brapa_ESTC043772	AT3G55080	Symbols: | SET domain-containing protein | chr3:20422453-20425572 REVERSE	154.484	1181.13	7.64565
Brapa_ESTC000173	AT4G29850	Symbols: | similar to unknown protein [Arabidopsis thaliana] (TAIR:AT2G19350.1); similar to unknown [Gymnadenia conopsea] (GB:ABD66514.1); contains InterPro domain Protein of unknown function DUF872, eukaryotic; (InterPro:IPR008590) | chr4:14601824-14602880 REVERSE	486.168	3701.66	7.61395
Brapa_ESTC021057	AT2G24060	Symbols: | translation initiation factor 3 (IF-3) family protein | chr2:10236533-10238470 FORWARD	141.009	1065.21	7.5542
Brapa_ESTC051750	no_hits_f	---------	347.321	2609.9	7.51437
Brapa_ESTC004914	AT1G15100	Symbols: RHA2A | RHA2A (RING-H2 finger A2A); protein binding / zinc ion binding | chr1:5193698-5194165 REVERSE	194.166	1441.38	7.42344
Brapa_ESTC040641	AT1G77870	Symbols: MUB5 | MUB5 (MEMBRANE-ANCHORED UBIQUITIN-FOLD PROTEIN 5 PRECURSOR) | chr1:29290071-29290608 FORWARD	147.291	1089.9	7.39964
Brapa_ESTC013960	AT1G32520	Symbols: | similar to Os11g0220300 [Oryza sativa (japonica cultivar-group)] (GB:NP_001067521.1); similar to hypothetical protein [Oryza sativa (japonica cultivar-group)] (GB:BAD61574.1) | chr1:11758402-11759252 REVERSE	312.213	2298.2	7.361
Brapa_ESTC047869	no_hits_f	---------	143.217	1052.6	7.34969
Brapa_ESTC047255	no_hits_f	---------	343.727	2524.64	7.3449
Brapa_ESTC050137	AT3G01090	Symbols: SnRK1.1, AKIN10 | AKIN10 (Arabidopsis SNF1 kinase homolog 10, SNF1-RELATED PROTEIN KINASE 1.1); protein kinase | chr3:31444-34150 REVERSE	138.086	1012.19	7.33014
Brapa_ESTC012812	AT1G09340	Symbols: | catalytic/ coenzyme binding | chr1:3015475-3018037 FORWARD	198.784	1453.67	7.31281
Brapa_ESTC049085	no_hits_f	---------	138.805	1013.23	7.29966
Brapa_ESTC015431	AT1G14040	Symbols: | similar to EXS family protein / ERD1/XPR1/SYG1 family protein [Arabidopsis thaliana] (TAIR:AT2G03260.1); similar to EXS family protein / ERD1/XPR1/SYG1 family protein [Arabidopsis thaliana] (TAIR:AT2G03250.1); similar to EXS family protein / ERD1/XPR1/SYG1 family protein [Arabidopsis thaliana] (TAIR:AT2G03240.1); similar to SPX, N-terminal; EXS, C-terminal [Medicago truncatula] (GB:ABD…	355.228	2583.14	7.27178
Brapa_ESTC020964	AT4G09970	| Symbols: | unknown protein | chr4:6246035-6247594 FORWARD	431.109	3103.06	7.19785
Brapa_ESTC005895	no_hits_f	---------	327.034	2339.77	7.15452
Brapa_ESTC022489	AT2G32960	Symbols: | tyrosine specific protein phosphatase family protein | chr2:13995053-13997797 FORWARD	203.656	1450.4	7.12181
Brapa_ESTC000737	AT2G17340	Symbols: | pantothenate kinase-related | chr2:7548697-7551171 REVERSE	179.288	1273.64	7.10388
Brapa_ESTC013170	AT4G29360	Symbols: | glycosyl hydrolase family 17 protein | chr4:14451568-14453693 REVERSE	428.434	3038.53	7.09218
Brapa_ESTC029890	AT5G18350	Symbols: | disease resistance protein (TIR-NBS-LRR class), putative | chr5:6074525-6078571 REVERSE	372.406	2637.5	7.08232
Brapa_ESTC013334	AT1G75840	Symbols: ARAC5, ATGP3, ROP4, , ATROP4 | /ATGP3/ATROP4 (RHO-LIKE GTP BINDING PROTEIN 4); GTP binding / GTPase | chr1:28479625-28481038 FORWARD	219.775	1552.3	7.06313
Brapa_ESTC006662	AT2G25440	Symbols: | leucine-rich repeat family protein | chr2:10833814-10836481 FORWARD	172.59	1218.56	7.06043
Brapa_ESTC028601	no_hits_f	---------	438.622	3091.75	7.04878
Brapa_ESTC045679	AT5G16190	Symbols: CSLA11, ATCSLA11 | ATCSLA11 (Cellulose synthase-like A11); transferase, transferring glycosyl groups | chr5:5283666-5286296 REVERSE	268.2	1883.36	7.02222
Brapa_ESTC011162	AT3G04520	Symbols: THA2 | THA2 (THREONINE ALDOLASE 2); threonine aldolase | chr3:1217403-1219577 REVERSE	163.293	1146.36	7.02026
Brapa_ESTC025758	AT5G15900	Symbols: | similar to unknown protein [Arabidopsis thaliana] (TAIR:AT5G15890.1); similar to hypothetical protein [Cleome spinosa] (GB:ABD96865.1); contains InterPro domain Protein of unknown function DUF231, plant; (InterPro:IPR004253) | chr5:5189527-5192073 REVERSE	442.565	3094.48	6.99215
Brapa_ESTC019488	AT1G64770	Symbols: | similar to unknown protein [Arabidopsis thaliana] (TAIR:AT1G55370.2); similar to Os03g0158300 [Oryza sativa (japonica cultivar-group)] (GB:NP_001049021.1); similar to Hypothetical protein [Oryza sativa (japonica cultivar-group)] (GB:AAN06836.1); contains InterPro domain Galactose mutarotase-like; (InterPro:IPR011013) | chr1:24061212-24062228 FORWARD	292.288	2040.31	6.98048
Brapa_ESTC009454	AT1G53990	Symbols: GLIP3 | GLIP3 (GDSL-motif lipase 3); carboxylic ester hydrolase/ lipase | chr1:20154684-20156420 FORWARD	267.897	1865.82	6.96469
Brapa_ESTC044594	no_hits_f	---------	146.221	1016.96	6.95495
Brapa_ESTC011860	AT2G19800	Symbols: MIOX2 | MIOX2 (MYO-INOSITOL OXYGENASE 2) | chr2:8538188-8540436 REVERSE	351.77	2446.16	6.95386
Brapa_ESTC013789	AT1G73480	Symbols: | hydrolase, alpha/beta fold family protein | chr1:27632927-27636147 FORWARD	353.619	2456.77	6.94751
Brapa_ESTC048631	AT3G55450	Symbols: | protein kinase, putative | chr3:20569106-20570940 FORWARD	451.324	3132.63	6.94098
Brapa_ESTC017713	AT1G21350	Symbols: | electron carrier/ oxidoreductase | chr1:7477364-7479000 REVERSE	324.746	2250.31	6.92945
Brapa_ESTC023751	AT2G30695	Symbols: | similar to Os01g0894700 [Oryza sativa (japonica cultivar-group)] (GB:NP_001045071.1); similar to P0696G06.13 [Oryza sativa (japonica cultivar-group)] (GB:BAC06256.1); similar to Os09g0515400 [Oryza sativa (japonica cultivar-group)] (GB:NP_001063667.1) | chr2:13086346-13088172 REVERSE	274.262	1894.43	6.90737
Brapa_ESTC035854	AT1G10640	Symbols: | polygalacturonase, putative / pectinase, putative | chr1:3515479-3516932 REVERSE	367.615	2531.56	6.88644
Brapa_ESTC018614	AT4G04540	Symbols: | protein kinase family protein | chr4:2259578-2262136 FORWARD	310.078	2128.74	6.86518
Brapa_ESTC031611	AT3G61080	Symbols: | fructosamine kinase family protein | chr3:22618127-22619858 FORWARD	375.063	2570.99	6.85482
Brapa_ESTC037878	AT2G20290	Symbols: ATXIG, XIG | XIG (Myosin-like protein XIG); motor/ protein binding | chr2:8750356-8758959 REVERSE	446.115	3016.08	6.76077
Brapa_ESTC014067	AT4G39970	Symbols: | haloacid dehalogenase-like hydrolase family protein | chr4:18536672-18538423 REVERSE	166.01	1122.22	6.75995
Brapa_ESTC001105	AT1G04530	| Symbols: | binding | chr1:1234455-1235894 REVERSE	340.983	2293.8	6.72702
Brapa_ESTC009495	AT5G22620	Symbols: | phosphoglycerate/bisphosphoglycerate mutase family protein | chr5:7517734-7520226 REVERSE	436.756	2920.29	6.68632
Brapa_ESTC017629	AT5G04620	Symbols: ATBIOF | ATBIOF; 8-amino-7-oxononanoate synthase/ transaminase | chr5:1327293-1329935 FORWARD	303.194	2025.95	6.68203
Brapa_ESTC048910	no_hits_f	---------	414.475	2717.86	6.55736
Brapa_ESTC006206	AT5G53420	Symbols: | similar to unknown protein [Arabidopsis thaliana] (TAIR:AT4G27900.2); similar to CCT [Medicago truncatula] (GB:ABE82748.1); contains InterPro domain CCT; (InterPro:IPR010402) | chr5:21691926-21692695 FORWARD	267.632	1747.76	6.53046
Brapa_ESTC005572	AT4G04570	Symbols: | protein kinase family protein | chr4:2290043-2292715 FORWARD	408.75	2648.29	6.479
Brapa_ESTC044620	AT4G29210	Symbols: GGT3 | GGT3 (GAMMA-GLUTAMYL TRANSPEPTIDASE 3); gamma-glutamyltransferase/ glutathione gamma-glutamylcysteinyltransferase | chr4:14400996-14403325 FORWARD	188.479	1219.89	6.47229
Brapa_ESTC024811	AT5G64810	Symbols: WRKY51 | WRKY51 (WRKY DNA-binding protein 51); transcription factor | chr5:25925641-25926913 FORWARD	154.901	1001.57	6.46587
Brapa_ESTC000832	no_hits_f	---------	363.373	2349.14	6.46482
Brapa_ESTC004716	AT3G61180	Symbols: | zinc finger (C3HC4-type RING finger) family protein | chr3:22656655-22658265 FORWARD	203.552	1313.38	6.45231
Brapa_ESTC048364	no_hits_f	---------	217.393	1396.65	6.42454
Brapa_ESTC017689	AT1G51600	Symbols: ZML2 | ZML2 (ZIM-LIKE 2); transcription factor | chr1:19136844-19138920 FORWARD	471.88	3008.8	6.3762
Brapa_ESTC025977	AT2G42570	Symbols: | similar to unknown protein [Arabidopsis thaliana] (TAIR:AT2G31110.2); similar to unknown [Pisum sativum] (GB:ABA29158.1); contains InterPro domain Protein of unknown function DUF231, plant; (InterPro:IPR004253) | chr2:17724576-17726999 REVERSE	411.885	2617.74	6.35551
Brapa_ESTC003013	AT1G14270	Symbols: | CAAX amino terminal protease family protein | chr1:4875094-4877190 REVERSE	366.538	2327.9	6.35105
Brapa_ESTC027039	AT5G06670	Symbols: | kinesin motor protein-related | chr5:2048244-2055020 REVERSE	356.879	2265.75	6.34879
Brapa_ESTC000862	AT2G36885	Symbols: | similar to Os03g0137600 [Oryza sativa (japonica cultivar-group)] (GB:NP_001048903.1); similar to unknown [Sorghum bicolor] (GB:ABE77193.1); contains domain no description (G3D.1.20.20.10) | chr2:15489246-15490755 REVERSE	225.868	1433.66	6.34734
Brapa_ESTC044257	no_hits_f	---------	208.186	1308.28	6.28419
Brapa_ESTC023371	AT5G43745	Symbols: | phosphotransferase-related | chr5:17586662-17592181 REVERSE	321.768	2018.12	6.27197
Brapa_ESTC004661	AT2G36440	| Symbols: | unknown protein | chr2:15299727-15299951 FORWARD	302.398	1886.16	6.23734
Brapa_ESTC038910	AT3G59210	| Symbols: | F-box family protein | chr3:21900919-21902530 FORWARD	254.898	1584.63	6.21672
Brapa_ESTC000500	AT2G31570	Symbols: ATGPX2 | ATGPX2 (GLUTATHIONE PEROXIDASE 2); glutathione peroxidase | chr2:13445288-13446852 REVERSE	318.471	1975.65	6.20355
Brapa_ESTC001585	AT1G27595	Symbols: | similar to ESP4 (ENHANCED SILENCING PHENOTYPE 4), binding [Arabidopsis thaliana] (TAIR:AT5G01400.1); similar to Os07g0693900 [Oryza sativa (japonica cultivar-group)] (GB:NP_001060734.1); similar to symplekin [Xenopus tropicalis] (GB:NP_989259.1); contains domain ARM repeat (SSF48371); contains domain gb def: T22C5.3 (PTHR15245:SF6); contains domain FAMILY NOT NAMED (PTHR15245) | chr1:9…	452.824	2795.58	6.17366
Brapa_ESTC007349	AT1G69530	Symbols: EXP1, AT-EXP1, ATEXP1, ATHEXP ALPHA 1.2, ATEXPA1 | ATEXPA1 (ARABIDOPSIS THALIANA EXPANSIN A1) | chr1:26145697-26146714 FORWARD	230.309	1403.09	6.09221
Brapa_ESTC051520	no_hits_f	---------	281.901	1714.03	6.08026
Brapa_ESTC048435	no_hits_f	---------	372.148	2261.24	6.07618
Brapa_ESTC042407	AT1G79680	Symbols: | wall-associated kinase, putative | chr1:29985081-29987642 REVERSE	222.675	1351.95	6.0714
Brapa_ESTC042709	AT3G06483	Symbols: PDK | PDK (PYRUVATE DEHYDROGENASE KINASE); ATP binding / [pyruvate dehydrogenase (lipoamide)] kinase | chr3:1990733-1992587 REVERSE	215.446	1297.6	6.02285
Brapa_ESTC034155	no_hits_f	---------	376.118	2263.22	6.01731
Brapa_ESTC002761	AT3G02800	Symbols: | phosphoprotein phosphatase | chr3:606645-607711 REVERSE	357.277	2147.22	6.00996
Brapa_ESTC049153	no_hits_f	---------	324.886	1948.19	5.99653
Brapa_ESTC046986	no_hits_f	---------	478.564	2868.85	5.9947
Brapa_ESTC017374	AT2G42870	Symbols: | similar to unknown protein [Arabidopsis thaliana] (TAIR:AT3G58850.1); similar to hypothetical protein [Oryza sativa (japonica cultivar-group)] (GB:BAB89478.1); contains InterPro domain Helix-loop-helix DNA-binding; (InterPro:IPR011598) | chr2:17843908-17844264 REVERSE	417.841	2503.48	5.99147
Brapa_ESTC001750	AT4G39210	Symbols: APL3 | APL3 (large subunit of AGP 3) | chr4:18260326-18263175 FORWARD	342.989	2049.2	5.97454
Brapa_ESTC019706	AT2G04235	Symbols: | similar to hypothetical protein [Trifolium pratense] (GB:BAE71230.1) | chr2:1449411-1455015 FORWARD	181.977	1085.4	5.96449
Brapa_ESTC004832	AT1G26130	Symbols: | haloacid dehalogenase-like hydrolase family protein | chr1:9033587-9038233 FORWARD	188.17	1118.68	5.94505
Brapa_ESTC006884	AT1G14700	Symbols: PAP3, ATPAP3 | ATPAP3/PAP3 (purple acid phosphatase 3) | chr1:5058675-5060983 FORWARD	250.042	1485.92	5.94268
Brapa_ESTC028151	no_hits_f	---------	408.934	2429.42	5.94086
Brapa_ESTC032029	AT1G70430	Symbols: | protein kinase family protein | chr1:26549252-26552419 FORWARD	393.835	2339.68	5.94076
Brapa_ESTC018247	AT1G69090	| Symbols: | F-box family protein | chr1:25981164-25982369 REVERSE	371.551	2207.28	5.94072
Brapa_ESTC010320	AT2G04790	Symbols: | similar to conserved hypothetical protein [Medicago truncatula] (GB:ABE79920.1) | chr2:1679525-1680324 FORWARD	181.379	1070	5.89925
Brapa_ESTC026776	AT2G19760	Symbols: PFN1, PRF1 | PFN1/PRF1 (PROFILIN 1); actin binding | chr2:8524156-8525149 REVERSE	355.877	2098.13	5.89566
Brapa_ESTC012850	AT1G16360	Symbols: | LEM3 (ligand-effect modulator 3) family protein / CDC50 family protein | chr1:5593487-5595173 REVERSE	222.085	1308.7	5.89279
Brapa_ESTC013671	AT1G12900	Symbols: GAPA-2 | GAPA-2; glyceraldehyde-3-phosphate dehydrogenase | chr1:4392632-4394281 REVERSE	368.343	2165.22	5.87827
Brapa_ESTC017448	AT4G04760	Symbols: | sugar transporter family protein | chr4:2424162-2427767 FORWARD	230.485	1352.59	5.86845
Brapa_ESTC005497	AT3G61080	Symbols: | fructosamine kinase family protein | chr3:22618127-22619858 FORWARD	271.274	1581.34	5.82931
Brapa_ESTC017762	AT2G18328	| Symbols: | DNA binding | chr2:7971560-7971793 FORWARD	401.22	2336.12	5.82254
Brapa_ESTC023997	AT1G08350	Symbols: | endomembrane protein 70 family protein | chr1:2632967-2635602 REVERSE	449.866	2611.67	5.80544
Brapa_ESTC029261	no_hits_f	---------	263.066	1518.67	5.77296
Brapa_ESTC020092	AT5G43990	Symbols: SUVR2 | SUVR2; histone-lysine N-methyltransferase/ zinc ion binding | chr5:17715750-17718960 FORWARD	315.75	1822.38	5.77159
Brapa_ESTC005931	AT3G02250	Symbols: | similar to unknown protein [Arabidopsis thaliana] (TAIR:AT5G15740.1); similar to hypothetical protein [Cleome spinosa] (GB:ABD96934.1); similar to Os06g0284200 [Oryza sativa (japonica cultivar-group)] (GB:NP_001057398.1); similar to hypothetical protein [Cleome spinosa] (GB:ABD96844.1); contains InterPro domain Protein of unknown function DUF246, plant; (InterPro:IPR004348) | chr3:4241…	477.916	2749.08	5.75222
Brapa_ESTC007433	AT1G11720	Symbols: ATSS3 | ATSS3 (STARCH SYNTHASE 3); starch synthase/ transferase, transferring glycosyl groups | chr1:3952511-3956840 FORWARD	372.165	2138.96	5.74734
Brapa_ESTC030167	no_hits_f	---------	467.854	2677.32	5.72255
Brapa_ESTC005510	AT4G28660	Symbols: PSB28 | photosystem II reaction centre W (PsbW) family protein | chr4:14150014-14150939 FORWARD	478.93	2740.69	5.72253
Brapa_ESTC015759	AT2G21385	Symbols: | similar to Os09g0531100 [Oryza sativa (japonica cultivar-group)] (GB:NP_001063753.1); similar to conserved hypothetical protein [Medicago truncatula] (GB:ABE89529.1) | chr2:9157242-9158832 FORWARD	462.028	2635.53	5.70426
Brapa_ESTC000054	AT3G12930	Symbols: | similar to Os09g0493600 [Oryza sativa (japonica cultivar-group)] (GB:NP_001063546.1); similar to Protein Iojap (GB:Q41822); contains InterPro domain Iojap-related protein; (InterPro:IPR004394) | chr3:4128472-4129623 FORWARD	329.565	1876.78	5.69472
Brapa_ESTC035802	AT1G56500	Symbols: | haloacid dehalogenase-like hydrolase family protein | chr1:21163440-21170757 FORWARD	345.793	1968.28	5.69208
Brapa_ESTC003921	no_hits_f	---------	379.002	2157.24	5.6919
Brapa_ESTC009099	AT2G16430	Symbols: PAP10 | PAP10; acid phosphatase/ protein serine/threonine phosphatase | chr2:7127584-7129854 REVERSE	227.827	1291.23	5.66759
Brapa_ESTC043780	AT3G55080	Symbols: | SET domain-containing protein | chr3:20422453-20426807 REVERSE	422.204	2389.33	5.65918
Brapa_ESTC028303	no_hits_f	---------	280.718	1585.68	5.64866
Brapa_ESTC005659	AT1G14040	Symbols: | similar to EXS family protein / ERD1/XPR1/SYG1 family protein [Arabidopsis thaliana] (TAIR:AT2G03260.1); similar to EXS family protein / ERD1/XPR1/SYG1 family protein [Arabidopsis thaliana] (TAIR:AT2G03250.1); similar to EXS family protein / ERD1/XPR1/SYG1 family protein [Arabidopsis thaliana] (TAIR:AT2G03240.1); similar to SPX, N-terminal; EXS, C-terminal [Medicago truncatula] (GB:ABD…	301.33	1695.98	5.62831
Brapa_ESTC037784	AT3G25110	Symbols: ATFATA | ATFATA (ARABIDOPSIS FATA ACYL-ACP THIOESTERASE); acyl carrier/ acyl-ACP thioesterase | chr3:9146596-9148280 REVERSE	376.256	2109.88	5.60757
Brapa_ESTC043909	AT3G59200	| Symbols: | F-box family protein | chr3:21898461-21900191 FORWARD	266.897	1494.4	5.59916
Brapa_ESTC051161	no_hits_f	---------	458.941	2569.68	5.59915
Brapa_ESTC018585	AT3G15354	Symbols: SPA3 | SPA3 (SPA1-RELATED 3); signal transducer | chr3:5169334-5172487 REVERSE	449.086	2501.23	5.5696
Brapa_ESTC004343	AT4G16420	Symbols: PRZ1, ADA2B | ADA2B (PROPORZ1); DNA binding / transcription factor | chr4:9262828-9265798 REVERSE	286.24	1593.33	5.56641
Brapa_ESTC026669	AT1G76450	Symbols: | oxygen-evolving complex-related | chr1:28689512-28691003 FORWARD	308.511	1709.26	5.54035
Brapa_ESTC037488	no_hits_f	---------	185.323	1026.27	5.53774
Brapa_ESTC045359	AT5G04190	Symbols: PKS4 | PKS4 (PHYTOCHROME KINASE SUBSTRATE 4) | chr5:1151115-1152335 FORWARD	219.096	1211.84	5.53109
Brapa_ESTC051373	no_hits_f	---------	317.593	1751.39	5.51457
Brapa_ESTC022723	AT5G20670	Symbols: | similar to unknown protein [Arabidopsis thaliana] (TAIR:AT1G72510.2); similar to 4Fe-4S ferredoxin, iron-sulfur binding [Medicago truncatula] (GB:ABE81755.1); contains InterPro domain Protein of unknown function DUF1677, plant; (InterPro:IPR012876) | chr5:6993334-6993795 REVERSE	264.424	1449.77	5.48275
Brapa_ESTC046190	AT5G47380	Symbols: | similar to unknown protein [Arabidopsis thaliana] (TAIR:AT5G66600.1); similar to hypothetical protein 24.t00022 [Brassica oleracea] (GB:ABD64944.1); contains InterPro domain Protein of unknown function DUF547; (InterPro:IPR006869) | chr5:19238699-19241698 REVERSE	233.218	1267.01	5.43273
Brapa_ESTC001701	AT5G56760	Symbols: SAT5, SAT-52, AtSerat1;1 | AtSerat1;1 (SERINE ACETYLTRANSFERASE 52); serine O-acetyltransferase | chr5:22978724-22979808 REVERSE	201.81	1094.36	5.42272
Brapa_ESTC016010	AT2G28410	Symbols: | similar to unknown protein [Arabidopsis thaliana] (TAIR:AT5G60650.1) | chr2:12163279-12163626 FORWARD	309.866	1678.46	5.41673
Brapa_ESTC039213	AT1G03055	Symbols: | similar to unknown protein [Arabidopsis thaliana] (TAIR:AT1G64680.1); similar to hypothetical protein LOC_Os11g37650 [Oryza sativa (japonica cultivar-group)] (GB:ABA94460.1) | chr1:710102-711763 REVERSE	201.703	1089.76	5.4028
Brapa_ESTC005743	AT5G45890	Symbols: SAG12 | SAG12 (SENESCENCE-ASSOCIATED GENE 12); cysteine-type peptidase | chr5:18630527-18631986 FORWARD	289.319	1554.04	5.37137
Brapa_ESTC001329	no_hits_f	---------	230.921	1236.39	5.35417
Brapa_ESTC051175	AT5G59150	Symbols: AtRABA2d | AtRABA2d (Arabidopsis Rab GTPase homolog A2d); GTP binding | chr5:23894084-23895470 FORWARD	259.442	1383.67	5.33325
Brapa_ESTC025460	AT5G62230	Symbols: ERL1 | ERL1 (ERECTA-LIKE 1); kinase | chr5:25013659-25019356 FORWARD	452.728	2408.71	5.32044
Brapa_ESTC028676	no_hits_f	---------	397.39	2100.22	5.28503
Brapa_ESTC009632	no_hits_f	---------	481.692	2532.16	5.2568
Brapa_ESTC030166	no_hits_f	---------	375.811	1972.63	5.24899
Brapa_ESTC013344	AT4G15510	Symbols: | photosystem II reaction center PsbP family protein | chr4:8860699-8862527 FORWARD	496.79	2602.29	5.23821
Brapa_ESTC010905	AT4G20150	Symbols: | similar to unknown protein [Phytophthora infestans] (GB:AAY43427.1); similar to Os07g0498300 [Oryza sativa (japonica cultivar-group)] (GB:NP_001059709.1) | chr4:10888539-10889510 REVERSE	232.195	1215.8	5.23612
Brapa_ESTC032513	AT4G00590	Symbols: | asparaginase 2 family protein | chr4:252835-254880 FORWARD	397.713	2072.06	5.20994
Brapa_ESTC022564	no_hits_f	---------	308.593	1594.34	5.16648
Brapa_ESTC026168	AT2G30170	| Symbols: | catalytic | chr2:12886879-12888123 REVERSE	456.525	2348.72	5.14478
Brapa_ESTC034686	no_hits_f	---------	254.155	1304.79	5.13384
Brapa_ESTC023498	AT1G18650	Symbols: | glycosyl hydrolase family protein 17 | chr1:6419028-6420405 REVERSE	372.238	1910.95	5.13368
Brapa_ESTC041905	AT2G41905	Symbols: | similar to AGP23 (ARABINOGALACTAN-PROTEIN 23) [Arabidopsis thaliana] (TAIR:AT3G57690.1); similar to pollen-specific arabinogalacta protein BAN102 [Brassica rapa] (GB:AAD21078.2) | chr2:17502844-17503029 FORWARD	290.62	1487.47	5.11826
Brapa_ESTC028105	AT3G22415	| Symbols: | unknown protein | chr3:7941344-7941547 FORWARD	199.88	1019.4	5.10006
Brapa_ESTC049466	no_hits_f	---------	486.488	2478.07	5.09379
Brapa_ESTC042012	no_hits_f	---------	289.601	1469.17	5.07308
Brapa_ESTC043124	AT5G62830	Symbols: | F-box family protein-related | chr5:25243394-25244008 REVERSE	278.206	1407.42	5.05891
Brapa_ESTC002622	AT4G08700	Symbols: ATPUP13 | ATPUP13 (Arabidopsis thaliana purine permease 13); purine transporter | chr4:5565995-5567283 REVERSE	285.979	1444.16	5.04988
Brapa_ESTC013197	AT5G44600	Symbols: | similar to unknown protein [Arabidopsis thaliana] (TAIR:AT5G44590.1); similar to expressed protein [Oryza sativa (japonica cultivar-group)] (GB:ABF93757.1); contains domain no description (G3D.3.40.50.150); contains domain S-adenosyl-L-methionine-dependent methyltransferases (SSF53335) | chr5:18007094-18008746 FORWARD	429.172	2165.36	5.04544
Brapa_ESTC012229	AT3G59280	Symbols: TXR1 | TXR1 (THAXTOMIN A RESISTANT 1) | chr3:21920243-21921496 REVERSE	265.909	1340.79	5.04229
Brapa_ESTC049777	AT1G78630	Symbols: EMB1473 | EMB1473 (EMBRYO DEFECTIVE 1473); structural constituent of ribosome | chr1:29580890-29582299 FORWARD	286.018	1436.99	5.02412
Brapa_ESTC025537	AT5G08640	Symbols: FLS | FLS (FLAVONOL SYNTHASE) | chr5:2804010-2805176 FORWARD	205.626	1032.12	5.0194
Brapa_ESTC048651	no_hits_f	---------	330.242	1652.59	5.00418
Brapa_ESTC049789	no_hits_f	---------	205.678	1023.91	4.97822
Brapa_ESTC016233	AT1G11330	Symbols: | S-locus lectin protein kinase family protein | chr1:3810372-3813416 FORWARD	296.793	1476.23	4.97394
Brapa_ESTC009884	AT2G46090	Symbols: | diacylglycerol kinase family protein | chr2:18957992-18960152 FORWARD	273.843	1358.4	4.96051
Brapa_ESTC000633	AT4G18370	Symbols: DEGP5, HHOA | HHOA (DEGP PROTEASE 5); serine-type peptidase/ trypsin | chr4:10149246-10151062 FORWARD	347.084	1716.95	4.94679
Brapa_ESTC035349	AT5G17700	Symbols: | MATE efflux family protein | chr5:5831027-5833417 REVERSE	254.241	1257.08	4.94444
Brapa_ESTC011432	AT4G32295	Symbols: | similar to unknown protein [Arabidopsis thaliana] (TAIR:AT3G24150.1); contains domain Kix domain of CBP (creb binding protein) (SSF47040) | chr4:15592966-15594086 FORWARD	288.731	1422.05	4.92517
Brapa_ESTC010065	AT2G16365	| Symbols: | F-box family protein | chr2:7082022-7083471 FORWARD	326.199	1606.47	4.92482
Brapa_ESTC023059	AT4G18740	Symbols: | contains domain Rho termination factor, N-terminal domain (SSF68912) | chr4:10303554-10304490 REVERSE	469.748	2310.79	4.91921
Brapa_ESTC023438	AT3G29320	Symbols: | glucan phosphorylase, putative | chr3:11254108-11258824 FORWARD	286.342	1408.18	4.91783
Brapa_ESTC005105	AT2G30490	Symbols: ATC4H, C4H, CYP73A5 | ATC4H (CINNAMATE-4-HYDROXYLASE) | chr2:13000938-13002760 REVERSE	349.31	1712.98	4.9039
Brapa_ESTC015660	AT1G77660	Symbols: | MORN (Membrane Occupation and Recognition Nexus) repeat-containing protein /phosphatidylinositol-4-phosphate 5-kinase-related | chr1:29190967-29192394 REVERSE	488.401	2389.51	4.89252
Brapa_ESTC002315	AT1G10640	Symbols: | polygalacturonase, putative / pectinase, putative | chr1:3515479-3516932 REVERSE	310.904	1516.3	4.87707
Brapa_ESTC009478	AT2G01870	| Symbols: | unknown protein | chr2:389845-390318 REVERSE	242.471	1179.03	4.86256
Brapa_ESTC027260	AT3G48610	Symbols: | phosphoesterase family protein | chr3:18022638-18024944 REVERSE	349.841	1700.14	4.85975
Brapa_ESTC050825	no_hits_f	---------	276.38	1341.51	4.85386
Brapa_ESTC011889	AT2G21280	Symbols: ATSULA, GC1 | GC1 (GIANT CHLOROPLAST 1); catalytic/ coenzyme binding | chr2:9117583-9119760 REVERSE	260.884	1264.16	4.84568
Brapa_ESTC051029	AT1G49950	Symbols: ATTRB1, TRB1 | ATTRB1/TRB1 (TELOMERE REPEAT BINDING FACTOR 1); DNA binding / transcription factor | chr1:18498107-18500381 REVERSE	395.765	1917.6	4.8453
Brapa_ESTC003285	no_hits_f	---------	218.414	1052.14	4.81718
Brapa_ESTC023744	AT3G59040	Symbols: | pentatricopeptide (PPR) repeat-containing protein | chr3:21832472-21835210 REVERSE	221.117	1063.95	4.81171
Brapa_ESTC040633	AT1G77990	Symbols: SULTR2;2, AST56 | AST56 (sulphate transporter 2;2); sulfate transporter | chr1:29322859-29328143 REVERSE	415.015	1991.24	4.798
Brapa_ESTC015106	AT1G54650	Symbols: | similar to unknown protein [Arabidopsis thaliana] (TAIR:AT2G26200.1); similar to Os07g0414200 [Oryza sativa (japonica cultivar-group)] (GB:NP_001059456.1); similar to PREDICTED: hypothetical protein isoform 1 [Gallus gallus] (GB:XP_001235215.1); contains InterPro domain Methyltransferase type 12; (InterPro:IPR013217); contains InterPro domain SAM (and some other nucleotide) binding mot…	274.454	1315.93	4.79472
Brapa_ESTC021264	AT5G66550	| Symbols: | Maf family protein | chr5:26576978-26578388 REVERSE	445.203	2120.28	4.7625
Brapa_ESTC022619	AT1G44760	Symbols: | universal stress protein (USP) family protein | chr1:16899334-16900867 REVERSE	266.727	1269.28	4.75872
Brapa_ESTC017047	AT5G15930	Symbols: PAM1 | PAM1 (PLANT ADHESION MOLECULE 1); RAB GTPase activator | chr5:5200332-5202253 FORWARD	440.535	2095.95	4.75774
Brapa_ESTC047297	AT1G49950	Symbols: ATTRB1, TRB1 | ATTRB1/TRB1 (TELOMERE REPEAT BINDING FACTOR 1); DNA binding / transcription factor | chr1:18498107-18500381 REVERSE	399.996	1902.13	4.75537
Brapa_ESTC042595	no_hits_f	---------	271.029	1287.73	4.75126
Brapa_ESTC029917	AT3G25860	Symbols: PLE2, LTA2 | LTA2 (PLASTID E2 SUBUNIT OF PYRUVATE DECARBOXYLASE); dihydrolipoyllysine-residue acetyltransferase | chr3:9461869-9463822 FORWARD	224.083	1057.99	4.72142
Brapa_ESTC051102	no_hits_f	---------	396.768	1873.14	4.721
Brapa_ESTC048300	AT2G23460	Symbols: ATXLG1, XLG1 | XLG1 (EXTRA-LARGE G-PROTEIN 1); signal transducer | chr2:10002779-10006025 FORWARD	235.573	1108.83	4.70695
Brapa_ESTC026302	AT1G11380	Symbols: | similar to unknown protein [Arabidopsis thaliana] (TAIR:AT5G05350.1); similar to Uncharacterized Cys-rich domain [Medicago truncatula] (GB:ABD32347.1); contains InterPro domain Protein of unknown function Cys-rich; (InterPro:IPR006461) | chr1:3832695-3833921 FORWARD	328.084	1541.35	4.69803
Brapa_ESTC051431	AT5G59350	Symbols: | similar to unknown protein [Arabidopsis thaliana] (TAIR:AT2G39560.1); similar to hypothetical protein MtrDRAFT_AC146757g30v1 [Medicago truncatula] (GB:ABE90639.1) | chr5:23958358-23959221 FORWARD	273.284	1274.13	4.66229
Brapa_ESTC047205	no_hits_f	---------	273.156	1270.62	4.65163
Brapa_ESTC040350	AT1G68030	Symbols: | PHD finger protein-related | chr1:25504041-25505207 REVERSE	378.759	1759.58	4.64565
Brapa_ESTC011036	AT2G17730	Symbols: | zinc finger (C3HC4-type RING finger) family protein | chr2:7711224-7712394 FORWARD	463.808	2128.88	4.59
Brapa_ESTC012370	AT5G52960	Symbols: | similar to hypothetical protein asr2994 [Nostoc sp. PCC 7120] (GB:NP_487034.1); similar to Os05g0569200 [Oryza sativa (japonica cultivar-group)] (GB:NP_001056361.1) | chr5:21494476-21495495 FORWARD	223.699	1024.66	4.58053
Brapa_ESTC006160	AT4G00970	Symbols: | protein kinase family protein | chr4:418437-421694 FORWARD	272.637	1242.6	4.55771
Brapa_ESTC028129	no_hits_f	---------	236.848	1077.06	4.54747
Brapa_ESTC045481	AT5G10480	Symbols: PEP, PAS2 | PAS2 (PASTICCINO 2) | chr5:3298048-3300049 REVERSE	239.952	1089.52	4.54057
Brapa_ESTC008312	AT2G19940	Symbols: | semialdehyde dehydrogenase family protein | chr2:8620505-8622730 FORWARD	292.033	1325.8	4.5399
Brapa_ESTC000971	AT3G48610	Symbols: | phosphoesterase family protein | chr3:18022638-18024944 REVERSE	420.816	1908.23	4.53459
Brapa_ESTC034676	AT5G57830	Symbols: | similar to unknown protein [Arabidopsis thaliana] (TAIR:AT4G30830.1); similar to Protein of unknown function DUF593 [Medicago truncatula] (GB:ABE79503.1); contains InterPro domain Protein of unknown function DUF593; (InterPro:IPR007656) | chr5:23446632-23448086 REVERSE	262.503	1190.34	4.53458
Brapa_ESTC003254	AT3G13235	Symbols: | ubiquitin family protein | chr3:4271499-4274355 REVERSE	332.704	1507.66	4.53154
Brapa_ESTC029058	AT3G28760	| Symbols: | similar to 3-dehydroquinate synthase	304.715	1376.76	4.51819
Brapa_ESTC050505	AT3G47470	Symbols: CAB4, LHCA4 | LHCA4 (Photosystem I light harvesting complex gene 4); chlorophyll binding | chr3:17504607-17505758 REVERSE	495.954	2227.21	4.49076
Brapa_ESTC012909	AT5G37360	Symbols: | similar to Os02g0815400 [Oryza sativa (japonica cultivar-group)] (GB:NP_001048502.1) | chr5:14822667-14825343 REVERSE	284.916	1279.29	4.49006
Brapa_ESTC009733	AT1G12220	Symbols: RPS5 | RPS5 (RESISTANT TO P. SYRINGAE 5) | chr1:4145009-4147678 FORWARD	326.71	1466.11	4.4875
Brapa_ESTC051803	AT5G16180	Symbols: CRS1, ATCRS1 | ATCRS1/CRS1 (ARABIDOPSIS ORTHOLOG OF MAIZE CHLOROPLAST SPLICING FACTOR CRS1) | chr5:5279887-5282901 FORWARD	467.775	2092.35	4.47298
Brapa_ESTC043942	AT3G60580	Symbols: | zinc finger (C2H2 type) family protein | chr3:22404982-22405848 FORWARD	313.823	1402.11	4.46784
Brapa_ESTC025795	no_hits_f	---------	439.488	1957.43	4.45389
Brapa_ESTC048882	AT5G58220	| Symbols: | steroid binding | chr5:23571772-23573087 REVERSE	463.762	2063.31	4.44907
Brapa_ESTC044198	no_hits_f	---------	464.806	2051.3	4.41324
Brapa_ESTC049790	no_hits_f	---------	252.299	1111.35	4.40489
Brapa_ESTC009063	AT4G11410	Symbols: | short-chain dehydrogenase/reductase (SDR) family protein | chr4:6945122-6947181 REVERSE	427.25	1879.58	4.39925
Brapa_ESTC048983	no_hits_f	---------	346.78	1515.71	4.37081
Brapa_ESTC001366	AT5G04140	Symbols: GLS1, GLUS, GLU1 | GLU1 (FERREDOXIN-DEPENDENT GLUTAMATE SYNTHASE 1) | chr5:1130032-1138187 FORWARD	428.326	1871.52	4.36938
Brapa_ESTC046070	AT5G45670	Symbols: | GDSL-motif lipase/hydrolase family protein | chr5:18545827-18547391 FORWARD	341.08	1489.79	4.36786
Brapa_ESTC007955	AT2G31980	Symbols: | cysteine proteinase inhibitor-related | chr2:13616323-13616847 REVERSE	229.825	1003.21	4.3651
Brapa_ESTC017738	AT5G04380	Symbols: | S-adenosyl-L-methionine:carboxyl methyltransferase family protein | chr5:1234884-1236318 FORWARD	310.31	1348.89	4.34691
Brapa_ESTC050957	no_hits_f	---------	457.017	1979.67	4.33172
Brapa_ESTC037911	AT2G43190	Symbols: | ribonuclease P family protein | chr2:17963297-17964910 FORWARD	360.705	1560.21	4.32545
Brapa_ESTC048211	AT2G24270	Symbols: ALDH11A3 | ALDH11A3 (Aldehyde dehydrogenase 11A3); 3-chloroallyl aldehyde dehydrogenase/ glyceraldehyde-3-phosphate dehydrogenase (NADP+) | chr2:10334405-10336681 REVERSE	383.514	1657.03	4.32065
Brapa_ESTC028933	AT5G09230	| Symbols: SRT2 | SRT2 | chr5:2871560-2873614 FORWARD	377.28	1620	4.29389
Brapa_ESTC000099	AT2G42570	Symbols: | similar to unknown protein [Arabidopsis thaliana] (TAIR:AT2G31110.2); similar to unknown [Pisum sativum] (GB:ABA29158.1); contains InterPro domain Protein of unknown function DUF231, plant; (InterPro:IPR004253) | chr2:17724576-17726999 REVERSE	473.324	2028.51	4.28567
Brapa_ESTC005439	AT4G29410	Symbols: | 60S ribosomal protein L28 (RPL28C) | chr4:14468445-14469970 REVERSE	268.398	1149.83	4.28405
Brapa_ESTC028631	no_hits_f	---------	249.806	1069.82	4.2826
Brapa_ESTC002911	AT2G44180	Symbols: MAP2A | MAP2A (METHIONINE AMINOPEPTIDASE 2A); methionyl aminopeptidase | chr2:18276518-18278861 REVERSE	329.749	1409.34	4.27398
Brapa_ESTC042638	AT3G07080	| Symbols: | membrane protein | chr3:2241366-2242940 FORWARD	395.91	1672.14	4.22354
Brapa_ESTC006729	AT3G07990	Symbols: SCPL27 | SCPL27 (serine carboxypeptidase-like 27); serine carboxypeptidase | chr3:2552550-2554650 FORWARD	433.339	1828.28	4.21905
Brapa_ESTC020905	AT5G52900	Symbols: | similar to hypothetical protein MtrDRAFT_AC150980g17v1 [Medicago truncatula] (GB:ABE87114.1) | chr5:21470119-21470918 REVERSE	382.373	1611.14	4.21353
Brapa_ESTC049955	no_hits_f	---------	494.34	2074.22	4.19594
Brapa_ESTC011985	AT1G03630	Symbols: PORC, POR C | POR C (PROTOCHLOROPHYLLIDE OXIDOREDUCTASE); NADPH dehydrogenase/ oxidoreductase/ protochlorophyllide reductase | chr1:907698-909244 FORWARD	454.396	1904.9	4.19216
Brapa_ESTC049053	AT1G80850	Symbols: | methyladenine glycosylase family protein | chr1:30390499-30392164 REVERSE	393.999	1648.95	4.18516
Brapa_ESTC016789	AT4G34060	Symbols: DML3 | DML3 (DEMETER-LIKE PROTEIN 3) | chr4:16314009-16319259 FORWARD	326.425	1358.81	4.1627
Brapa_ESTC027038	AT5G58920	Symbols: | similar to Os01g0362000 [Oryza sativa (japonica cultivar-group)] (GB:NP_001043026.1) | chr5:23810465-23811240 FORWARD	458.686	1908.96	4.1618
Brapa_ESTC014453	AT4G21380	Symbols: ARK3 | ARK3 (Arabidopsis Receptor Kinase 3); kinase | chr4:11389230-11393101 REVERSE	257.083	1068.84	4.15757
Brapa_ESTC008570	AT1G70100	Symbols: | similar to unknown protein [Arabidopsis thaliana] (TAIR:AT1G24160.1); similar to Targeting for Xklp2 [Medicago truncatula] (GB:ABE84619.1) | chr1:26407399-26409495 FORWARD	461.915	1916.25	4.14849
Brapa_ESTC042624	AT3G06880	Symbols: | transducin family protein / WD-40 repeat family protein | chr3:2169862-2175692 REVERSE	337.154	1396.93	4.1433
Brapa_ESTC004688	AT3G05300	Symbols: | cytidine/deoxycytidylate deaminase family protein | chr3:1508030-1508493 REVERSE	241.568	1000.69	4.14248
Brapa_ESTC032962	AT4G31060	Symbols: | AP2 domain-containing transcription factor, putative | chr4:15116902-15117465 FORWARD	381.956	1581.61	4.14082
Brapa_ESTC023074	AT4G34250	Symbols: | fatty acid elongase, putative | chr4:16394753-16396234 FORWARD	386.508	1598.72	4.13632
Brapa_ESTC026290	AT5G49760	Symbols: | leucine-rich repeat family protein / protein kinase family protein | chr5:20233905-20238278 FORWARD	370.898	1531.24	4.12847
Brapa_ESTC034537	AT5G21950	Symbols: | hydrolase, alpha/beta fold family protein | chr5:7254070-7255869 REVERSE	442.673	1820.78	4.11315
Brapa_ESTC025936	AT4G00370	Symbols: ANTR2 | ANTR2 (anion transporter 2); organic anion transporter | chr4:163153-166111 REVERSE	458.505	1877.86	4.09562
Brapa_ESTC019862	AT1G70850	Symbols: MLP34 | MLP34 (MLP-LIKE PROTEIN 34) | chr1:26719091-26720406 REVERSE	263.328	1076.81	4.08923
Brapa_ESTC031965	AT2G39890	Symbols: ATPROT1, ProT1 | ProT1 (PROLINE TRANSPORTER 1) | chr2:16663100-16665280 FORWARD	368.379	1503.16	4.08047
Brapa_ESTC011463	AT5G16030	Symbols: | similar to unknown protein [Arabidopsis thaliana] (TAIR:AT3G02500.1); similar to hypothetical protein [Cleome spinosa] (GB:ABD96956.1) | chr5:5238245-5240581 FORWARD	304.098	1237.91	4.07076
Brapa_ESTC048762	AT3G56910	Symbols: PSRP5 | PSRP5 (PLASTID-SPECIFIC 50S RIBOSOMAL PROTEIN 5) | chr3:21080537-21081236 REVERSE	495.912	2013.94	4.06108
Brapa_ESTC047123	no_hits_f	---------	380.028	1534.37	4.03752
Brapa_ESTC003335	AT2G32720	Symbols: B5 #4 | B5 #4 (cytochrome b5 family protein #4); heme binding / transition metal ion binding | chr2:13884090-13885524 REVERSE	247.87	1000.53	4.03651
Brapa_ESTC020537	AT4G11640	Symbols: ATSR | ATSR (ARABIDOPSIS THALIANA SIGNAL-RESPONSIVE); serine racemase | chr4:7021764-7023246 FORWARD	330.989	1332.97	4.02723
Brapa_ESTC047748	AT2G22970	| Symbols: SCPL11 | SCPL11 | chr2:9781955-9785335 FORWARD	266.269	1069.18	4.01541
Brapa_ESTC004473	AT4G21510	| Symbols: | F-box family protein | chr4:11446205-11447037 REVERSE	272.453	1092.84	4.01111
Brapa_ESTC013990	AT1G74440	Symbols: | similar to unknown protein [Arabidopsis thaliana] (TAIR:AT1G18720.1); similar to YGL010w-like protein [Picea mariana] (GB:AAC32136.1); contains InterPro domain Protein of unknown function DUF962; (InterPro:IPR009305) | chr1:27982869-27984032 REVERSE	306.146	1224.96	4.00123
Brapa_ESTC000688	AT1G73325	Symbols: | trypsin and protease inhibitor family protein / Kunitz family protein | chr1:27571179-27571847 REVERSE	404.685	1615.48	3.99194
Brapa_ESTC005308	AT3G30841	Symbols: | 2,3-biphosphoglycerate-independent phosphoglycerate mutase-related / phosphoglyceromutase-related | chr3:12594074-12595880 FORWARD	253.951	1013.67	3.9916
Brapa_ESTC013404	AT5G59610	Symbols: | DNAJ heat shock N-terminal domain-containing protein | chr5:24030391-24032180 FORWARD	310.841	1240.69	3.9914
Brapa_ESTC035865	AT1G48660	Symbols: | auxin-responsive GH3 family protein | chr1:17999616-18001640 REVERSE	312.057	1242.53	3.98174
Brapa_ESTC031135	AT3G15570	Symbols: | phototropic-responsive NPH3 family protein | chr3:5270274-5271707 REVERSE	418.488	1663.56	3.97517
Brapa_ESTC049649	AT5G47060	Symbols: | senescence-associated protein-related | chr5:19134070-19134866 FORWARD	372.982	1476.91	3.95974
Brapa_ESTC046823	no_hits_f	---------	467.799	1842.86	3.93943
Brapa_ESTC015161	AT3G04120	Symbols: GAPC-1, GAPC | GAPC (GLYCERALDEHYDE-3-PHOSPHATE DEHYDROGENASE C SUBUNIT); glyceraldehyde-3-phosphate dehydrogenase | chr3:1081084-1083138 FORWARD	355.924	1394.69	3.91851
Brapa_ESTC003880	no_hits_f	---------	383.77	1501.58	3.91271
Brapa_ESTC048437	no_hits_f	---------	362.859	1416.03	3.90242
Brapa_ESTC041982	AT2G40435	Symbols: | similar to unknown protein [Arabidopsis thaliana] (TAIR:AT3G56220.1); similar to Os03g0338400 [Oryza sativa (japonica cultivar-group)] (GB:NP_001050055.1); similar to hypothetical protein [Oryza sativa (japonica cultivar-group)] (GB:BAC10078.1); similar to Os05g0337200 [Oryza sativa (japonica cultivar-group)] (GB:NP_001055237.1); contains domain Regulatory domain in the aminoacid metab…	327.996	1279.11	3.89977
Brapa_ESTC020525	AT4G30820	Symbols: | cyclin-dependent kinase-activating kinase assembly factor-related / CDK-activating kinase assembly factor-related | chr4:15007150-15008384 FORWARD	480.101	1856.47	3.86683
Brapa_ESTC002179	AT5G46860	Symbols: ATVAM3, SYP22, ATSYP22, SGR3, VAM3 | VAM3 (syntaxin 22); t-SNARE | chr5:19029569-19031022 REVERSE	295.33	1141.47	3.86507
Brapa_ESTC031819	AT3G60160	Symbols: ATMRP9 | ATMRP9 (Arabidopsis thaliana multidrug resistance-associated protein 9) | chr3:22234804-22240170 REVERSE	266.219	1028.34	3.86276
Brapa_ESTC014248	AT4G14365	Symbols: | zinc finger (C3HC4-type RING finger) family protein / ankyrin repeat family protein | chr4:8271656-8273681 REVERSE	441.096	1681.44	3.81196
Brapa_ESTC016473	AT3G47650	Symbols: | bundle-sheath defective protein 2 family / bsd2 family | chr3:17580561-17581247 FORWARD	404.525	1540.11	3.80721
Brapa_ESTC008767	AT4G29210	Symbols: GGT3 | GGT3 (GAMMA-GLUTAMYL TRANSPEPTIDASE 3); gamma-glutamyltransferase | chr4:14400996-14402758 FORWARD	352.091	1337.73	3.79939
Brapa_ESTC032777	no_hits_f	---------	422.736	1602.16	3.78998
Brapa_ESTC038909	AT3G59190	| Symbols: | F-box family protein | chr3:21895717-21897078 FORWARD	321.528	1217.51	3.78664
Brapa_ESTC004753	AT5G12440	Symbols: | zinc finger (CCCH-type) family protein | chr5:4035892-4038311 REVERSE	419.169	1578.19	3.76504
Brapa_ESTC041648	AT2G33760	Symbols: | pentatricopeptide (PPR) repeat-containing protein | chr2:14282876-14284627 FORWARD	391.824	1472.68	3.75852
Brapa_ESTC032428	AT2G27480	| Symbols: | calcium ion binding | chr2:11753889-11754963 FORWARD	478.184	1792.93	3.74946
Brapa_ESTC049098	AT5G59050	Symbols: | similar to unknown protein [Arabidopsis thaliana] (TAIR:AT3G54000.1); similar to IMP dehydrogenase/GMP reductase [Medicago truncatula] (GB:ABD33149.1) | chr5:23856720-23859745 REVERSE	368.31	1380.79	3.74899
Brapa_ESTC006124	AT5G64810	Symbols: WRKY51 | WRKY51 (WRKY DNA-binding protein 51); transcription factor | chr5:25925641-25926913 FORWARD	312.403	1165.5	3.73076
Brapa_ESTC037212	AT3G61700	Symbols: | similar to unknown protein [Arabidopsis thaliana] (TAIR:AT2G46420.1); similar to uncharacterized plant-specific domain TIGR01589 family protein [Solanum demissum] (GB:AAU93592.2); contains InterPro domain Conserved hypothetical protein 1589, plant; (InterPro:IPR006476) | chr3:22847389-22849778 FORWARD	456.953	1704.68	3.73054
Brapa_ESTC016696	AT5G22860	Symbols: | serine carboxypeptidase S28 family protein | chr5:7639910-7642948 REVERSE	399.624	1490.19	3.72898
Brapa_ESTC051083	no_hits_f	---------	275.332	1022.43	3.71344
Brapa_ESTC050916	AT5G24430	Symbols: | calcium-dependent protein kinase, putative / CDPK, putative | chr5:8339393-8342916 REVERSE	327.315	1214.5	3.71049
Brapa_ESTC004777	AT2G44150	Symbols: ASHH3 | SET domain-containing protein (ASHH3) | chr2:18265939-18268079 FORWARD	351.442	1301.2	3.70246
Brapa_ESTC030992	no_hits_f	---------	325.861	1202.56	3.69041
Brapa_ESTC005950	AT1G26940	Symbols: | peptidyl-prolyl cis-trans isomerase cyclophilin-type family protein | chr1:9343180-9344949 FORWARD	319.498	1175.72	3.6799
Brapa_ESTC028108	no_hits_f	---------	433.914	1596.75	3.67988
Brapa_ESTC000715	AT5G47820	Symbols: FRA1 | FRA1 (FRAGILE FIBER 1); microtubule motor | chr5:19383731-19389455 FORWARD	290.559	1063.36	3.6597
Brapa_ESTC031099	AT3G02250	Symbols: | similar to unknown protein [Arabidopsis thaliana] (TAIR:AT5G15740.1); similar to hypothetical protein [Cleome spinosa] (GB:ABD96934.1); similar to Os06g0284200 [Oryza sativa (japonica cultivar-group)] (GB:NP_001057398.1); similar to hypothetical protein [Cleome spinosa] (GB:ABD96844.1); contains InterPro domain Protein of unknown function DUF246, plant; (InterPro:IPR004348) | chr3:4241…	444.568	1619.08	3.64192
Brapa_ESTC025900	AT2G23150	Symbols: ATNRAMP3, NRAMP3 | NRAMP3 (NRAMP metal ion transporter 3); manganese ion transporter/ metal ion transporter | chr2:9863502-9865645 REVERSE	417.771	1521.2	3.64123
Brapa_ESTC050003	AT1G78160	Symbols: APUM7 | APUM7 (ARABIDOPSIS PUMILIO 7); RNA binding | chr1:29412793-29415077 FORWARD	398.411	1450.12	3.63976
Brapa_ESTC022714	AT3G04890	Symbols: | similar to unknown protein [Arabidopsis thaliana] (TAIR:AT2G46100.1); similar to unnamed protein product [Ostreococcus tauri] (GB:CAL53979.1); contains domain NTF2-like (SSF54427) | chr3:1347714-1349072 FORWARD	316.585	1152.29	3.63975
Brapa_ESTC009343	AT1G26500	Symbols: | pentatricopeptide (PPR) repeat-containing protein | chr1:9158367-9159884 FORWARD	422.479	1534.47	3.63206
Brapa_ESTC047357	AT1G55340	Symbols: | similar to unknown protein [Arabidopsis thaliana] (TAIR:AT3G03880.1); similar to unknown protein [Oryza sativa (japonica cultivar-group)] (GB:AAV67822.1); similar to Os03g0807200 [Oryza sativa (japonica cultivar-group)] (GB:NP_001051641.1); contains InterPro domain Protein of unknown function DUF1639; (InterPro:IPR012438) | chr1:20656271-20657135 FORWARD	389.246	1411.08	3.62516
Brapa_ESTC046720	AT5G67520	Symbols: | adenylylsulfate kinase, putative | chr5:26956568-26958068 FORWARD	396.152	1435.64	3.62396
Brapa_ESTC001675	AT4G17810	Symbols: | nucleic acid binding / transcription factor/ zinc ion binding | chr4:9906931-9907545 FORWARD	442.213	1601.14	3.62074
Brapa_ESTC040535	no_hits_f	---------	479.81	1732.22	3.61022
Brapa_ESTC005387	AT5G26670	Symbols: | pectinacetylesterase, putative | chr5:9318459-9320819 FORWARD	347.371	1248.92	3.59535
Brapa_ESTC040052	AT1G26680	Symbols: | transcriptional factor B3 family protein | chr1:9219539-9223180 FORWARD	455.185	1625.52	3.57112
Brapa_ESTC047957	AT4G22890	Symbols: | similar to unknown protein [Arabidopsis thaliana] (TAIR:AT4G11960.1); similar to Os03g0857400 [Oryza sativa (japonica cultivar-group)] (GB:NP_001051955.1); similar to Os08g0526300 [Oryza sativa (japonica cultivar-group)] (GB:NP_001062297.1); similar to hypothetical protein OSJNBa0003M24.13 [Oryza sativa (japonica cultivar-group)] (GB:AAQ56398.1); contains domain no description (G3D.2.2…	469.259	1674.01	3.56735
Brapa_ESTC000105	AT2G32720	Symbols: B5 #4 | B5 #4 (cytochrome b5 family protein #4); heme binding / transition metal ion binding | chr2:13884090-13885524 REVERSE	437.566	1559.89	3.56493
Brapa_ESTC013593	AT1G74420	Symbols: ATFUT3, FUT3 | FUT3 (fucosyltransferase 3); fucosyltransferase | chr1:27971682-27973460 REVERSE	483.47	1720.07	3.55776
Brapa_ESTC018046	AT1G19710	Symbols: | glycosyl transferase family 1 protein | chr1:6814911-6816707 FORWARD	476.675	1691.23	3.54797
Brapa_ESTC008084	AT1G16560	| Symbols: | Per1-like family protein | chr1:5668938-5670336 FORWARD	344.825	1218.73	3.53434
Brapa_ESTC046253	AT5G55000	Symbols: FIP2 | FIP2 (FH protein interacting protein 2); voltage-gated potassium channel | chr5:22335870-22338825 FORWARD	448.7	1582.74	3.52739
Brapa_ESTC025962	AT1G10600	Symbols: | similar to mov34 family protein [Arabidopsis thaliana] (TAIR:AT1G48790.1); similar to Os01g0661500 [Oryza sativa (japonica cultivar-group)] (GB:NP_001043779.1); similar to ALM beta-like [Oryza sativa (japonica cultivar-group)] (GB:BAD72364.1); contains InterPro domain Mov34/MPN/PAD-1; (InterPro:IPR000555); contains InterPro domain Mov34-1; (InterPro:IPR003639) | chr1:3503766-3505191 FO…	417.679	1471.36	3.52271
Brapa_ESTC010142	AT1G21090	Symbols: | hydroxyproline-rich glycoprotein family protein | chr1:7384843-7386188 FORWARD	347.522	1221.05	3.51359
Brapa_ESTC000936	AT3G63095	Symbols: | Encodes a Protease inhibitor/seed storage/LTP family protein | chr3:23326481-23327233 FORWARD	296.731	1041.06	3.50843
Brapa_ESTC034086	no_hits_f	---------	349.826	1226.37	3.50566
Brapa_ESTC044363	AT4G23190	Symbols: AT-RLK3, CRK11 | CRK11 (CYSTEINE-RICH RLK11); kinase | chr4:12141208-12143721 REVERSE	410.904	1437.51	3.49841
Brapa_ESTC014588	AT3G59660	Symbols: | C2 domain-containing protein / GRAM domain-containing protein | chr3:22045403-22049461 REVERSE	335.665	1171.78	3.49092
Brapa_ESTC011816	AT3G51960	Symbols: | bZIP family transcription factor | chr3:19293806-19295042 REVERSE	309.151	1079.03	3.4903
Brapa_ESTC045465	AT5G32621	Symbols: | similar to unknown protein [Arabidopsis thaliana] (TAIR:AT3G15310.1); similar to hypothetical protein 24.t00017 [Brassica oleracea] (GB:ABD64939.1); contains InterPro domain Protein of unknown function DUF635; (InterPro:IPR006912); contains InterPro domain Bacterial adhesion; (InterPro:IPR008966) | chr5:12288590-12290958 FORWARD	420.645	1466.77	3.48695
Brapa_ESTC013903	AT1G02470	Symbols: | similar to unknown protein [Arabidopsis thaliana] (TAIR:AT1G02475.1); similar to Streptomyces cyclase/dehydrase [Medicago truncatula] (GB:ABE82400.1); contains InterPro domain Streptomyces cyclase/dehydrase; (InterPro:IPR005031) | chr1:511916-513573 REVERSE	300.694	1047.86	3.48481
Brapa_ESTC020233	AT3G28940	Symbols: | avirulence-responsive protein, putative / avirulence induced gene (AIG) protein, putative | chr3:10969561-10970548 REVERSE	491.283	1708.4	3.47743
Brapa_ESTC051614	no_hits_f	---------	490.511	1697.69	3.46106
Brapa_ESTC023049	AT1G15220	| Symbols: ATCCMH | ATCCMH | chr1:5240466-5241112 REVERSE	432.781	1496.71	3.45835
Brapa_ESTC037345	AT4G11850	Symbols: MEE54 | PLDGAMMA1 (maternal effect embryo arrest 54); phospholipase D | chr4:7129346-7132931 REVERSE	352.704	1210.3	3.43149
Brapa_ESTC005770	AT3G27340	Symbols: | similar to COG3536: Uncharacterized protein conserved in bacteria [Magnetospirillum magnetotacticum MS-1] (GB:ZP_00055772.1); similar to Os02g0197800 [Oryza sativa (japonica cultivar-group)] (GB:NP_001046202.1); similar to hypothetical protein amb0010 [Magnetospirillum magneticum AMB-1] (GB:YP_419373.1); contains InterPro domain Protein of unknown function DUF971; (InterPro:IPR010376) …	358.046	1221.92	3.41275
Brapa_ESTC044396	AT3G26460	Symbols: | major latex protein-related / MLP-related | chr3:9685290-9685844 REVERSE	349.97	1194.28	3.41252
Brapa_ESTC049587	AT1G27150	| Symbols: | binding | chr1:9429164-9432055 FORWARD	299.981	1022.05	3.40705
Brapa_ESTC017314	AT2G47710	Symbols: | universal stress protein (USP) family protein | chr2:19562115-19563026 REVERSE	366.9	1245.48	3.3946
Brapa_ESTC018463	AT2G20725	Symbols: | CAAX amino terminal protease family protein | chr2:8941194-8942507 REVERSE	478.803	1623.52	3.39079
Brapa_ESTC037364	AT4G12020	Symbols: ATWRKY19, WRKY19, MAPKKK11 | WRKY19 (WRKY DNA-binding protein 19); transcription factor | chr4:7201650-7208590 FORWARD	411.555	1394.27	3.38781
Brapa_ESTC043202	no_hits_f	---------	316.878	1072.19	3.38361
Brapa_ESTC026079	AT5G53340	Symbols: | galactosyltransferase family protein | chr5:21658271-21660421 REVERSE	360.631	1219.37	3.38121
Brapa_ESTC012389	AT5G17660	| Symbols: | methyltransferase | chr5:5818780-5820813 REVERSE	419.113	1414.78	3.37565
Brapa_ESTC021232	AT5G53340	Symbols: | transferase, transferring hexosyl groups | chr5:21658271-21660421 REVERSE	384.291	1279.38	3.3292
Brapa_ESTC027227	AT1G26680	Symbols: | transcriptional factor B3 family protein | chr1:9219539-9223180 FORWARD	379.787	1263.14	3.32592
Brapa_ESTC045977	AT5G40210	Symbols: | nodulin MtN21 family protein | chr5:16090953-16093316 REVERSE	416.605	1383.38	3.3206
Brapa_ESTC018695	AT5G48030	Symbols: GFA2 | GFA2 (GAMETOPHYTIC FACTOR 2); heat shock protein binding / unfolded protein binding | chr5:19483524-19486979 REVERSE	408.221	1354.53	3.31813
Brapa_ESTC026869	AT1G69520	Symbols: | methyltransferase-related | chr1:26131951-26133265 FORWARD	350.014	1160.02	3.31421
Brapa_ESTC041976	AT2G40435	Symbols: | similar to unknown protein [Arabidopsis thaliana] (TAIR:AT3G56220.1); similar to Os03g0338400 [Oryza sativa (japonica cultivar-group)] (GB:NP_001050055.1); similar to hypothetical protein [Oryza sativa (japonica cultivar-group)] (GB:BAC10078.1); similar to Os05g0337200 [Oryza sativa (japonica cultivar-group)] (GB:NP_001055237.1); contains domain Regulatory domain in the aminoacid metab…	434.713	1438.32	3.30867
Brapa_ESTC042271	AT2G12480	Symbols: SCPL43 | SCPL43; serine carboxypeptidase | chr2:5076877-5079309 REVERSE	451.193	1492.81	3.30858
Brapa_ESTC050977	AT2G40810	Symbols: AtATG18c | AtATG18c (Arabidopsis thaliana homolog of yeast autophagy 18 (ATG18) c) | chr2:17039764-17041416 FORWARD	433.845	1434.06	3.30547
Brapa_ESTC020790	AT4G11640	Symbols: ATSR | ATSR (ARABIDOPSIS THALIANA SIGNAL-RESPONSIVE); serine racemase | chr4:7021764-7023246 FORWARD	478.468	1571.74	3.28494
Brapa_ESTC025556	AT3G49320	Symbols: | similar to unknown protein [Arabidopsis thaliana] (TAIR:AT5G41970.1); similar to LOC496075 protein [Xenopus laevis] (GB:AAH87491.1); similar to LOC496075 protein [Xenopus laevis] (GB:AAI06661.1); similar to Os02g0686600 [Oryza sativa (japonica cultivar-group)] (GB:NP_001047772.1); contains InterPro domain Metal-dependent protein hydrolase; (InterPro:IPR003226) | chr3:18299366-18301614 …	483.194	1583.31	3.27676
Brapa_ESTC003914	no_hits_f	---------	367.802	1204.03	3.27358
Brapa_ESTC013855	AT1G68660	Symbols: | similar to Os08g0432500 [Oryza sativa (japonica cultivar-group)] (GB:NP_001061868.1); similar to ATP-dependent Clp protease adaptor protein ClpS [Trichodesmium erythraeum IMS101] (GB:YP_720956.1); contains InterPro domain ATP-dependent Clp protease adaptor protein ClpS; (InterPro:IPR003769) | chr1:25781721-25782746 REVERSE	417.936	1367.34	3.27165
Brapa_ESTC020821	AT4G10150	Symbols: | zinc finger (C3HC4-type RING finger) family protein | chr4:6328132-6329554 FORWARD	465.404	1517.74	3.26112
Brapa_ESTC014489	AT5G18480	Symbols: PGSIP6 | glycogenin glucosyltransferase (glycogenin)-related | chr5:6131309-6133789 REVERSE	460.362	1500.01	3.25833
Brapa_ESTC010685	AT2G21960	Symbols: | similar to unknown protein [Arabidopsis thaliana] (TAIR:AT1G56180.1); similar to Os04g0639300 [Oryza sativa (japonica cultivar-group)] (GB:NP_001054033.1); similar to OSJNBb0003B01.9 [Oryza sativa (japonica cultivar-group)] (GB:CAE03618.3); similar to unnamed protein product [Ostreococcus tauri] (GB:CAL58559.1) | chr2:9362070-9364038 FORWARD	374.402	1217.81	3.25268
Brapa_ESTC015455	AT1G66130	Symbols: | oxidoreductase N-terminal domain-containing protein | chr1:24618703-24620405 FORWARD	317.846	1022.39	3.21662
Brapa_ESTC011065	AT5G17400	Symbols: | ADP, ATP carrier protein, mitochondrial, putative / ADP/ATP translocase, putative / adenine nucleotide translocator, putative | chr5:5729017-5730106 REVERSE	455.109	1462.81	3.2142
Brapa_ESTC037154	AT5G59660	Symbols: | leucine-rich repeat protein kinase, putative | chr5:24052913-24057205 FORWARD	429.138	1377.19	3.2092
Brapa_ESTC049993	AT3G04340	Symbols: EMB2458 | EMB2458 (EMBRYO DEFECTIVE 2458); ATPase | chr3:1146950-1151917 REVERSE	425.132	1361.35	3.20218
Brapa_ESTC005914	no_hits_f	---------	402.879	1289.71	3.20123
Brapa_ESTC040664	AT1G77580	Symbols: | myosin heavy chain-related | chr1:29149526-29151494 REVERSE	483.586	1547.52	3.20009
Brapa_ESTC005307	AT5G49730	Symbols: ATFRO6, FRO6 | ATFRO6/FRO6 (FERRIC REDUCTION OXIDASE 6); ferric-chelate reductase/ oxidoreductase | chr5:20218581-20221681 REVERSE	458.229	1459.48	3.18505
Brapa_ESTC001227	AT5G27380	Symbols: GSH2, GSHB | GSH2 (GLUTATHIONE SYNTHETASE 2); glutathione synthase | chr5:9668214-9670915 REVERSE	435.751	1386.86	3.18269
Brapa_ESTC014402	AT2G40750	Symbols: ATWRKY54, WRKY54 | WRKY54 (WRKY DNA-binding protein 54); transcription factor | chr2:17007714-17009432 REVERSE	321.621	1021.19	3.17513
Brapa_ESTC004322	AT3G25120	Symbols: | mitochondrial import inner membrane translocase subunit Tim17/Tim22/Tim23 family protein | chr3:9149792-9151075 REVERSE	391.004	1240.15	3.17171
Brapa_ESTC026170	AT1G24160	Symbols: | similar to unknown protein [Arabidopsis thaliana] (TAIR:AT1G70100.3); similar to Targeting for Xklp2 [Medicago truncatula] (GB:ABE84619.1) | chr1:8553658-8555819 REVERSE	325.155	1030.71	3.1699
Brapa_ESTC041374	no_hits_f	---------	329.769	1038.53	3.14927
Brapa_ESTC047688	AT3G43120	Symbols: | auxin-responsive protein-related | chr3:15105632-15106300 FORWARD	330.546	1040.86	3.14891
Brapa_ESTC017706	AT5G52420	Symbols: | similar to unknown protein [Arabidopsis thaliana] (TAIR:AT5G23920.1); similar to Os10g0548100 [Oryza sativa (japonica cultivar-group)] (GB:NP_001065301.1); similar to unknown [Xerophyta humilis] (GB:AAT45003.1) | chr5:21299043-21299771 FORWARD	332.311	1043.14	3.13905
Brapa_ESTC013136	AT1G29240	Symbols: | similar to unknown protein [Arabidopsis thaliana] (TAIR:AT2G34170.1); similar to Protein of unknown function DUF688 [Medicago truncatula] (GB:ABE80249.1); contains InterPro domain Protein of unknown function DUF688; (InterPro:IPR007789) | chr1:10217009-10218910 REVERSE	423.275	1328.38	3.13834
Brapa_ESTC038160	AT3G18870	Symbols: | mitochondrial transcription termination factor-related / mTERF-related | chr3:6508521-6509345 REVERSE	493.202	1546.22	3.13506
Brapa_ESTC043851	AT3G57190	Symbols: | peptide chain release factor, putative | chr3:21177447-21179177 FORWARD	469.642	1465.8	3.1211
Brapa_ESTC035864	AT1G48660	Symbols: | auxin-responsive GH3 family protein | chr1:17999616-18001640 REVERSE	478.916	1488.68	3.10844
Brapa_ESTC035091	AT3G57600	Symbols: | AP2 domain-containing transcription factor, putative | chr3:21343818-21344651 FORWARD	455.193	1410.83	3.09941
Brapa_ESTC013488	AT3G25530	Symbols: GHBDH, ATGHBDH | 6-phosphogluconate dehydrogenase NAD-binding domain-containing protein | chr3:9273186-9274751 REVERSE	430.166	1333.02	3.09885
Brapa_ESTC037161	no_hits_f	---------	446.091	1373.82	3.07969
Brapa_ESTC038737	AT2G40116	Symbols: | phosphoinositide-specific phospholipase C family protein | chr2:16758860-16761389 FORWARD	337.122	1038.18	3.07954
Brapa_ESTC045816	no_hits_f	---------	419.524	1284.48	3.06176
Brapa_ESTC011572	AT3G25560	Symbols: NIK2 | NIK2 (NSP-INTERACTING KINASE 2); protein kinase | chr3:9280919-9283797 REVERSE	429.073	1313.12	3.06037
Brapa_ESTC046541	no_hits_f	---------	456.306	1392.84	3.05243
Brapa_ESTC043064	AT4G21380	Symbols: ARK3 | ARK3 (Arabidopsis Receptor Kinase 3); kinase | chr4:11389230-11393101 REVERSE	400.588	1219.45	3.04415
Brapa_ESTC027146	AT4G22165	| Symbols: | F-box family protein | chr4:11734340-11735431 FORWARD	357.918	1089.29	3.04341
Brapa_ESTC015799	AT2G28070	Symbols: | ABC transporter family protein | chr2:11963509-11966859 FORWARD	407.54	1237.67	3.03693
Brapa_ESTC039136	AT4G35180	Symbols: LHT7 | LHT7 (LYS/HIS TRANSPORTER 7); amino acid permease | chr4:16738522-16740390 REVERSE	450.526	1362.16	3.02349
Brapa_ESTC031835	no_hits_f	---------	420.333	1269.6	3.02046
Brapa_ESTC008945	AT5G19390	Symbols: | pleckstrin homology (PH) domain-containing protein / RhoGAP domain-containing protein | chr5:6531908-6537145 FORWARD	482.925	1456.96	3.01695
Brapa_ESTC048446	no_hits_f	---------	443.566	1335.43	3.01067
Brapa_ESTC014395	AT1G74210	Symbols: | glycerophosphoryl diester phosphodiesterase family protein | chr1:27914057-27916446 FORWARD	386.805	1161.93	3.00392
Brapa_ESTC036944	no_hits_f	---------	433.351	1300.7	3.00149
Brapa_ESTC043864	AT3G59670	Symbols: | similar to unknown protein [Arabidopsis thaliana] (TAIR:AT4G37440.2); similar to Os05g0366300 [Oryza sativa (japonica cultivar-group)] (GB:NP_001055330.1); similar to Os05g0365200 [Oryza sativa (japonica cultivar-group)] (GB:NP_001055324.1); similar to Os01g0316900 [Oryza sativa (japonica cultivar-group)] (GB:NP_001042881.1); contains domain GHMP Kinase, C-terminal domain (SSF55060) | …	439.749	1318.59	2.99851
Brapa_ESTC019511	AT4G20030	Symbols: | RNA recognition motif (RRM)-containing protein | chr4:10846372-10847256 FORWARD	419.521	1256.38	2.9948
Brapa_ESTC035379	no_hits_f	---------	474.082	1417.06	2.98906
Brapa_ESTC048894	no_hits_f	---------	486.856	1450.54	2.9794
Brapa_ESTC021750	AT5G11950	Symbols: | Identical to Lysine decarboxylase-like protein At5g11950 [Arabidopsis Thaliana] (GB:Q84MC2;GB:Q570P8;GB:Q9LYH8); similar to unknown protein [Arabidopsis thaliana] (TAIR:AT2G37210.1); similar to Conserved hypothetical protein 730 [Medicago truncatula] (GB:ABE86251.1); contains InterPro domain Conserved hypothetical protein 730; (InterPro:IPR005269) | chr5:3855073-3856816 FORWARD	426.718	1270.33	2.97698
Brapa_ESTC047961	no_hits_f	---------	454.381	1350.77	2.97277
Brapa_ESTC022630	AT4G23190	Symbols: AT-RLK3, CRK11 | CRK11 (CYSTEINE-RICH RLK11); kinase | chr4:12141208-12143721 REVERSE	453.602	1348.2	2.97221
Brapa_ESTC050321	AT2G27450	Symbols: ATNLP1, CPA, NLP1 | NLP1 (NITRILASE-LIKE PROTEIN 1); hydrolase, acting on carbon-nitrogen (but not peptide) bonds | chr2:11744744-11746655 REVERSE	340.711	1011.34	2.96832
Brapa_ESTC051248	no_hits_f	---------	382.416	1134.7	2.96719
Brapa_ESTC017005	AT2G04235	Symbols: | similar to hypothetical protein [Trifolium pratense] (GB:BAE71230.1) | chr2:1449411-1455015 FORWARD	487.632	1443.47	2.96016
Brapa_ESTC023629	AT5G47330	Symbols: | palmitoyl protein thioesterase family protein | chr5:19224397-19225938 FORWARD	478.188	1415.32	2.95976
Brapa_ESTC033362	AT4G31520	| Symbols: | SDA1 family protein | chr4:15278287-15281745 REVERSE	436.776	1290.8	2.95529
Brapa_ESTC023821	AT3G49120	Symbols: ATPERX34, PERX34, PRXCB, ATPCB | ATPCB/ATPERX34/PERX34/PRXCB (PEROXIDASE 34); peroxidase | chr3:18218804-18221026 FORWARD	369.971	1093.19	2.9548
Brapa_ESTC011257	AT4G34680	Symbols: | GATA transcription factor 3, putative (GATA-3) | chr4:16553705-16554615 FORWARD	370.733	1095.15	2.95401
Brapa_ESTC016083	AT2G38760	Symbols: ANNAT3 | ANNAT3 (ANNEXIN 3, ANNEXIN ARABIDOPSIS 3); calcium ion binding / calcium-dependent phospholipid binding | chr2:16208164-16209568 FORWARD	431.563	1274.66	2.95359
Brapa_ESTC031012	AT1G21360	Symbols: GLTP2 | GLTP2 (GLYCOLIPID TRANSFER PROTEIN 2) | chr1:7481353-7483226 FORWARD	414.991	1223.48	2.94821
Brapa_ESTC025927	AT3G17609	Symbols: HYH | HYH (HY5-HOMOLOG); DNA binding / transcription factor | chr3:6023977-6024591 FORWARD	391.824	1152.43	2.94119
Brapa_ESTC034228	no_hits_f	---------	425.129	1248.63	2.93706
Brapa_ESTC014745	AT2G17650	Symbols: | AMP-dependent synthetase and ligase family protein | chr2:7678123-7680018 FORWARD	434.122	1267.88	2.92056
Brapa_ESTC045975	AT3G56520	Symbols: | no apical meristem (NAM) family protein | chr3:20958086-20958710 REVERSE	470.672	1373.66	2.91851
Brapa_ESTC037634	AT1G49130	| Symbols: | zinc ion binding | chr1:18178409-18179479 REVERSE	429.872	1253.29	2.9155
Brapa_ESTC051542	no_hits_f	---------	490.855	1430.58	2.91447
Brapa_ESTC045042	AT4G34060	Symbols: DML3 | DML3 (DEMETER-LIKE PROTEIN 3) | chr4:16314009-16319259 FORWARD	448.599	1306.55	2.91251
Brapa_ESTC029599	AT4G32570	Symbols: | contains InterPro domain ZIM; (InterPro:IPR010399) | chr4:15716439-15718708 REVERSE	431.775	1256.57	2.91024
Brapa_ESTC017512	AT5G60550	Symbols: GRIK2 | GRIK2 (GEMINIVIRUS REP INTERACTING KINASE 2); kinase | chr5:24357361-24359582 FORWARD	379.229	1101.93	2.90571
Brapa_ESTC045201	AT1G07010	Symbols: | calcineurin-like phosphoesterase family protein | chr1:2152948-2154967 FORWARD	432.27	1254.43	2.90196
Brapa_ESTC017105	AT4G28830	Symbols: | similar to early nodule-specific-like protein ENOD8 gene [Triticum aestivum] (GB:AAP80670.1); similar to Os06g0162600 [Oryza sativa (japonica cultivar-group)] (GB:NP_001056890.1); contains InterPro domain SAM (and some other nucleotide) binding motif; (InterPro:IPR000051); contains InterPro domain Methyltransferase type 11; (InterPro:IPR013216) | chr4:14232496-14233923 FORWARD	432.635	1252.18	2.89431
Brapa_ESTC035777	no_hits_f	---------	460.98	1324.59	2.87342
Brapa_ESTC050515	no_hits_f	---------	414.852	1188.26	2.8643
Brapa_ESTC045523	AT5G39650	Symbols: | similar to unknown protein [Arabidopsis thaliana] (TAIR:AT1G09157.1); similar to 52O08_3 [Brassica rapa subsp. pekinensis] (GB:AAZ67548.1); contains InterPro domain Protein of unknown function DUF679; (InterPro:IPR007770) | chr5:15892493-15893227 FORWARD	420.628	1203.85	2.86203
Brapa_ESTC028421	no_hits_f	---------	394.724	1129.02	2.86028
Brapa_ESTC027485	AT5G12080	Symbols: | mechanosensitive ion channel domain-containing protein / MS ion channel domain-containing protein | chr5:3898183-3900924 REVERSE	488.425	1392.27	2.85053
Brapa_ESTC044459	no_hits_f	---------	486.714	1385.48	2.8466
Brapa_ESTC033909	AT3G15310	Symbols: | similar to unknown protein [Arabidopsis thaliana] (TAIR:AT5G32621.1); similar to hypothetical protein 24.t00017 [Brassica oleracea] (GB:ABD64939.1); contains InterPro domain Protein of unknown function DUF635; (InterPro:IPR006912); contains InterPro domain Bacterial adhesion; (InterPro:IPR008966) | chr3:5152289-5153536 REVERSE	469.857	1336.81	2.84514
Brapa_ESTC022753	AT2G28070	Symbols: | ABC transporter family protein | chr2:11963509-11966859 FORWARD	368.379	1043.97	2.83396
Brapa_ESTC012713	AT3G01570	Symbols: | glycine-rich protein / oleosin | chr3:222159-222785 REVERSE	375.063	1059.55	2.82499
Brapa_ESTC044360	AT4G22920	Symbols: | Similar to the tomato senescence-inducible chloroplast stay-green protein 1. It is upregulated during maximal senescence in the Arabidopsis life cycle, especially in senescent leaves. | chr4:12016787-12017980 REVERSE	487.305	1373.3	2.81815
Brapa_ESTC001243	no_hits_f	---------	368.172	1030.34	2.79853
Brapa_ESTC026626	AT1G08450	Symbols: CRT3 | CRT3 (CALRETICULIN 3); calcium ion binding | chr1:2668005-2671797 REVERSE	386.379	1079.76	2.79456
Brapa_ESTC018900	AT4G22130	| Symbols: | kinase | chr4:11723745-11727343 FORWARD	370.126	1033.5	2.79229
Brapa_ESTC035922	AT2G45330	Symbols: EMB1067 | EMB1067 (EMBRYO DEFECTIVE 1067); tRNA 2'-phosphotransferase | chr2:18693414-18694948 FORWARD	415.782	1154.67	2.7771
Brapa_ESTC047684	AT1G74690	Symbols: IQD31 | IQD31 (IQ-domain 31); calmodulin binding | chr1:28065159-28067585 REVERSE	408.024	1130.76	2.77131
Brapa_ESTC047532	AT5G55480	Symbols: | glycerophosphoryl diester phosphodiesterase family protein | chr5:22491503-22495045 FORWARD	408.065	1130.54	2.77049
Brapa_ESTC019650	AT2G46690	Symbols: | auxin-responsive family protein | chr2:19187974-19188339 FORWARD	404.661	1117.55	2.76169
Brapa_ESTC026098	AT1G63850	Symbols: | PRLI-interacting factor-related | chr1:23700625-23702371 FORWARD	472.916	1305.82	2.76121
Brapa_ESTC031419	no_hits_f	---------	468.798	1293.24	2.75863
Brapa_ESTC051809	no_hits_f	---------	407.238	1119.4	2.74876
Brapa_ESTC022500	AT3G21300	Symbols: | RNA methyltransferase family protein | chr3:7493660-7496263 REVERSE	368.197	1008.55	2.73916
Brapa_ESTC034848	AT3G63470	Symbols: SCPL40 | SCPL40 (serine carboxypeptidase-like 40); serine carboxypeptidase | chr3:23449536-23451837 FORWARD	449.064	1223.27	2.72404
Brapa_ESTC010122	AT5G67160	Symbols: | transferase family protein | chr5:26814926-26816230 REVERSE	488.063	1328.58	2.72215
Brapa_ESTC032960	AT4G31050	Symbols: | lipoyltransferase (LIP2p) | chr4:15114351-15115449 FORWARD	407.825	1109.23	2.71987
Brapa_ESTC033431	AT4G21180	Symbols: | DNAJ heat shock N-terminal domain-containing protein / sec63 domain-containing protein | chr4:11289347-11292189 FORWARD	410.443	1115.69	2.71826
Brapa_ESTC050826	no_hits_f	---------	476.954	1283.53	2.6911
Brapa_ESTC033994	AT4G25410	Symbols: | basix helix-loop-helix (bHLH) family protein | chr4:12985782-12986693 FORWARD	413.306	1109.77	2.6851
Brapa_ESTC019003	AT3G06120	Symbols: | basic helix-loop-helix (bHLH) family protein | chr3:1846537-1848022 FORWARD	406.531	1086.7	2.6731
Brapa_ESTC017566	AT1G11790	| Symbols: | prephenate dehydratase | chr1:3981475-3984561 FORWARD	450.866	1203.6	2.66953
Brapa_ESTC013536	AT1G23220	Symbols: | dynein light chain type 1 family protein | chr1:8242603-8244125 FORWARD	486.342	1293.96	2.6606
Brapa_ESTC017679	AT1G79450	Symbols: | LEM3 (ligand-effect modulator 3) family protein / CDC50 family protein | chr1:29892724-29894797 FORWARD	407.058	1078.19	2.64874
Brapa_ESTC016438	AT4G23680	Symbols: | major latex protein-related / MLP-related | chr4:12336426-12337427 REVERSE	432.714	1143.69	2.64306
Brapa_ESTC028714	no_hits_f	---------	450.526	1190.19	2.64178
Brapa_ESTC027125	AT4G31870	Symbols: ATGPX7 | ATGPX7 (GLUTATHIONE PEROXIDASE 7); glutathione peroxidase | chr4:15410211-15411623 FORWARD	422.583	1109.8	2.62623
Brapa_ESTC017604	AT1G68160	Symbols: | similar to unknown protein [Arabidopsis thaliana] (TAIR:AT1G10820.2); similar to OSJNBa0067K08.3 [Oryza sativa (japonica cultivar-group)] (GB:CAE03109.1); similar to H0322F07.7 [Oryza sativa (indica cultivar-group)] (GB:CAH67770.1); similar to Os02g0631200 [Oryza sativa (japonica cultivar-group)] (GB:NP_001047499.1); contains InterPro domain Homeodomain-like; (InterPro:IPR009057) | chr…	485.028	1273.22	2.62504
Brapa_ESTC043163	AT3G17700	Symbols: CNGC20, ATCNGC20, CNBT1 | CNBT1 (CYCLIC NUCLEOTIDE-BINDING TRANSPORTER 1); calmodulin binding / cyclic nucleotide binding / ion channel | chr3:6049080-6052455 FORWARD	397.118	1041.69	2.62312
Brapa_ESTC031139	no_hits_f	---------	476.01	1247.3	2.62032
Brapa_ESTC018299	AT1G49740	| Symbols: | phospholipase C | chr1:18411396-18413136 FORWARD	387.995	1016.21	2.61913
Brapa_ESTC039553	AT1G13410	| Symbols: | binding | chr1:4601523-4603171 FORWARD	450.113	1177.61	2.61625
Brapa_ESTC016298	AT2G45730	Symbols: | eukaryotic initiation factor 3 gamma subunit family protein | chr2:18843593-18846197 REVERSE	437.498	1139.36	2.60426
Brapa_ESTC038094	no_hits_f	---------	444.509	1157.25	2.60343
Brapa_ESTC040282	AT1G31190	Symbols: | inositol monophosphatase family protein | chr1:11144842-11146781 FORWARD	487.99	1268.25	2.59893
Brapa_ESTC035196	AT4G30410	| Symbols: | transcription factor | chr4:14871315-14871857 REVERSE	480.466	1247.65	2.59675
Brapa_ESTC029710	AT4G23020	Symbols: | similar to unknown protein [Arabidopsis thaliana] (TAIR:AT4G11780.1) | chr4:12066342-12068453 REVERSE	472.083	1222.24	2.58904
Brapa_ESTC001254	AT2G16430	Symbols: PAP10 | PAP10; acid phosphatase/ protein serine/threonine phosphatase | chr2:7127584-7129854 REVERSE	413.182	1069.73	2.589
Brapa_ESTC051636	AT5G08400	Symbols: | similar to oxidoreductase/ transition metal ion binding [Arabidopsis thaliana] (TAIR:AT4G29400.1); similar to unknown protein [Oryza sativa (japonica cultivar-group)] (GB:BAD23058.1); similar to Os02g0827600 [Oryza sativa (japonica cultivar-group)] (GB:NP_001048595.1) | chr5:2707226-2708912 REVERSE	437.741	1133.28	2.58893
Brapa_ESTC047530	no_hits_f	---------	406.158	1050.79	2.58715
Brapa_ESTC050711	AT5G11480	| Symbols: | GTP binding | chr5:3669351-3671472 REVERSE	445.588	1145.76	2.57134
Brapa_ESTC025999	AT3G50890	Symbols: ATHB28 | ATHB28 (ARABIDOPSIS THALIANA HOMEOBOX PROTEIN 28); DNA binding / transcription factor | chr3:18927401-18928150 FORWARD	463.746	1189.01	2.56393
Brapa_ESTC028579	AT3G26690	Symbols: ATNUDT13 | ATNUDT13 (ARABIDOPSIS THALIANA NUDIX HYDROLASE HOMOLOG 13); hydrolase | chr3:9805655-9806635 REVERSE	391.696	1003.97	2.56314
Brapa_ESTC031508	AT3G07270	| Symbols: | GTP cyclohydrolase I | chr3:2314011-2317065 FORWARD	495.528	1266.49	2.55584
Brapa_ESTC048602	AT1G11800	Symbols: | endonuclease/exonuclease/phosphatase family protein | chr1:3985519-3987262 REVERSE	414.343	1058.36	2.55431
Brapa_ESTC051796	no_hits_f	---------	475.475	1214.04	2.55332
Brapa_ESTC042001	no_hits_f	---------	410.356	1046.36	2.54988
Brapa_ESTC045981	AT4G13440	Symbols: | calcium-binding EF hand family protein | chr4:7810211-7810675 FORWARD	396.58	1009.82	2.54632
Brapa_ESTC042353	no_hits_f	---------	428.238	1086.98	2.53826
Brapa_ESTC047076	AT1G10740	| Symbols: | similar to unknown protein [Arabidopsis thaliana]	444.713	1126.33	2.53271
Brapa_ESTC032109	AT5G08740	Symbols: NDC1 | NDC1 (NAD(P)H DEHYDROGENASE C1); NADH dehydrogenase | chr5:2848753-2851324 REVERSE	403.876	1021.86	2.53013
Brapa_ESTC006319	no_hits_f	---------	477.599	1207.97	2.52926
Brapa_ESTC020089	AT3G20260	Symbols: | similar to unknown protein [Arabidopsis thaliana] (TAIR:AT1G73850.1); similar to conserved hypothetical protein [Medicago truncatula] (GB:ABD32213.1); similar to Os08g0519600 [Oryza sativa (japonica cultivar-group)] (GB:NP_001062260.1); similar to Os01g0129500 [Oryza sativa (japonica cultivar-group)] (GB:NP_001041917.1); contains InterPro domain Protein of unknown function DUF1666; (In…	426.816	1077.76	2.52512
Brapa_ESTC039676	no_hits_f	---------	400.563	1009.18	2.5194
Brapa_ESTC038942	AT5G59040	Symbols: COPT3 | COPT3 (Copper transporter 3); copper ion transporter | chr5:23853950-23854405 FORWARD	472.674	1188.8	2.51505
Brapa_ESTC048868	no_hits_f	---------	426.286	1069.99	2.51003
Brapa_ESTC034188	no_hits_f	---------	443.878	1110.16	2.50105
Brapa_ESTC002971	AT3G29320	Symbols: | glucan phosphorylase, putative | chr3:11254108-11258824 FORWARD	456.637	1141.7	2.50024
Brapa_ESTC029479	no_hits_f	---------	426.406	1065.41	2.49858
Brapa_ESTC036078	no_hits_f	---------	444.895	1099.99	2.47247
Brapa_ESTC036426	AT1G07985	Symbols: | similar to expressed protein [Oryza sativa (japonica cultivar-group)] (GB:ABF97687.1); similar to hypothetical protein [Oryza sativa (japonica cultivar-group)] (GB:AAR89048.1); similar to Os03g0623100 [Oryza sativa (japonica cultivar-group)] (GB:NP_001050687.1) | chr1:2475505-2475939 FORWARD	484.748	1197.14	2.46961
Brapa_ESTC035581	AT3G24315	Symbols: ATSEC20 | sec20 family protein | chr3:8820606-8822452 REVERSE	481.899	1188.79	2.46689
Brapa_ESTC014926	AT3G29240	Symbols: | similar to unknown protein [Arabidopsis thaliana] (TAIR:AT1G33780.1); similar to Os10g0330400 [Oryza sativa (japonica cultivar-group)] (GB:NP_001064365.1); similar to Protein of unknown function DUF179 [Medicago truncatula] (GB:ABE94310.1); contains InterPro domain Protein of unknown function DUF179; (InterPro:IPR003774) | chr3:11193017-11194105 FORWARD	468.12	1154.4	2.46603
Brapa_ESTC027229	AT4G11400	Symbols: | ARID/BRIGHT DNA-binding domain-containing protein / ELM2 domain-containing protein / Myb-like DNA-binding domain-containing protein | chr4:6938712-6940534 FORWARD	411.097	1013.1	2.46438
Brapa_ESTC005435	AT5G59310	Symbols: LTP4 | LTP4 (LIPID TRANSFER PROTEIN 4); lipid binding | chr5:23942522-23942998 REVERSE	468.203	1150.43	2.45712
Brapa_ESTC034966	AT5G60300	Symbols: | lectin protein kinase family protein | chr5:24282088-24285199 FORWARD	420.834	1033.21	2.45515
Brapa_ESTC033907	no_hits_f	---------	455.684	1117.36	2.45205
Brapa_ESTC044735	AT1G13080	Symbols: CYP71B2 | CYP71B2 (CYTOCHROME P450 71B2); oxygen binding | chr1:4459491-4460805 FORWARD	443.378	1080.04	2.43594
Brapa_ESTC018881	AT1G57750	Symbols: | cytochrome P450, putative | chr1:21387851-21389344 REVERSE	413.65	1007.52	2.43568
Brapa_ESTC006987	AT3G20370	Symbols: | meprin and TRAF homology domain-containing protein / MATH domain-containing protein | chr3:7105487-7107085 FORWARD	421.46	1024.54	2.43093
Brapa_ESTC045060	AT4G33790	Symbols: | acyl CoA reductase, putative | chr4:16204327-16206665 REVERSE	498.486	1208.37	2.42408
Brapa_ESTC037909	AT3G02470	Symbols: SAMDC | SAMDC (S-ADENOSYLMETHIONINE DECARBOXYLASE) | chr3:510230-511330 FORWARD	491.09	1190.39	2.42398
Brapa_ESTC039424	AT1G09500	Symbols: | cinnamyl-alcohol dehydrogenase family / CAD family | chr1:3066813-3068486 FORWARD	476.352	1154.18	2.42296
Brapa_ESTC004718	AT3G16300	Symbols: | integral membrane family protein | chr3:5525497-5526213 REVERSE	464.248	1122.53	2.41795
Brapa_ESTC024126	AT4G34412	Symbols: | similar to unknown [Solanum tuberosum] (GB:ABA81864.1); similar to Os01g0142200 [Oryza sativa (japonica cultivar-group)] (GB:NP_001041990.1); contains domain CGI-121 FAMILY MEMBER (PTHR15840); contains domain gb def: At4g34412 (PTHR15840:SF4) | chr4:16453103-16454519 REVERSE	472.849	1139.76	2.41041
Brapa_ESTC042180	AT1G45191	Symbols: | glycosyl hydrolase family 1 protein | chr1:17118484-17121516 FORWARD	475.378	1141.85	2.40198
Brapa_ESTC015884	no_hits_f	---------	449.378	1077.83	2.39849
Brapa_ESTC027744	AT5G55810	Symbols: ATNMNAT | nicotinamide-nucleotide adenylyltransferase, putative / NAD(+) pyrophosphorylase, putative | chr5:22601455-22603465 REVERSE	423.231	1012.86	2.39316
Brapa_ESTC029714	AT4G23240	Symbols: | protein kinase family protein | chr4:12160512-12161964 REVERSE	452.459	1082.23	2.39189
Brapa_ESTC036509	AT2G34200	Symbols: | zinc finger (C3HC4-type RING finger) family protein | chr2:14448184-14448961 FORWARD	466.064	1107.72	2.37676
Brapa_ESTC040006	AT1G24370	Symbols: | similar to unknown protein [Arabidopsis thaliana] (TAIR:AT3G15310.1); similar to Os01g0180200 [Oryza sativa (japonica cultivar-group)] (GB:NP_001042205.1); similar to unknown protein [Oryza sativa (japonica cultivar-group)] (GB:AAT93896.1); similar to ribosomal protein-like [Oryza sativa (japonica cultivar-group)] (GB:BAD23759.1); contains InterPro domain Protein of unknown function DU…	476.754	1129.99	2.37017
Brapa_ESTC001265	AT3G62600	Symbols: | DNAJ heat shock family protein | chr3:23162014-23164322 REVERSE	438.296	1037.81	2.36783
Brapa_ESTC008052	AT4G27820	Symbols: | glycosyl hydrolase family 1 protein | chr4:13857879-13860577 REVERSE	466.398	1102.02	2.36283
Brapa_ESTC032767	AT3G19850	Symbols: | phototropic-responsive NPH3 family protein | chr3:6898389-6901163 REVERSE	461.513	1076.86	2.33333
Brapa_ESTC034073	no_hits_f	---------	484.831	1130.24	2.3312
Brapa_ESTC020570	AT1G64330	Symbols: | myosin heavy chain-related | chr1:23875835-23877633 FORWARD	464.907	1066.36	2.29371
Brapa_ESTC026843	AT1G48520	Symbols: GATB | GATB (GLU-ADT SUBUNIT B); glutamyl-tRNA(Gln) amidotransferase | chr1:17943853-17946208 FORWARD	464.089	1062.28	2.28896
Brapa_ESTC017930	no_hits_f	---------	497.655	1138.12	2.28697
Brapa_ESTC007581	AT1G65860	Symbols: | flavin-containing monooxygenase family protein / FMO family protein | chr1:24502873-24506341 REVERSE	439.454	1004.81	2.2865
Brapa_ESTC001189	no_hits_f	---------	498.416	1139.53	2.2863
Brapa_ESTC005746	AT2G29340	Symbols: | short-chain dehydrogenase/reductase (SDR) family protein | chr2:12604208-12606086 FORWARD	458.565	1045.08	2.27902
Brapa_ESTC018820	no_hits_f	---------	493.823	1122.65	2.27339
Brapa_ESTC038065	no_hits_f	---------	497.289	1130.32	2.27296
Brapa_ESTC051277	no_hits_f	---------	492.923	1117.13	2.26634
Brapa_ESTC008928	AT1G16250	Symbols: | kelch repeat-containing F-box family protein | chr1:5557208-5558691 FORWARD	497.996	1125.51	2.26008
Brapa_ESTC033013	no_hits_f	---------	488.232	1103.22	2.25962
Brapa_ESTC021917	AT1G11720	Symbols: ATSS3 | ATSS3 (STARCH SYNTHASE 3); starch synthase/ transferase, transferring glycosyl groups | chr1:3952511-3956840 FORWARD	465.398	1044.8	2.24496
Brapa_ESTC039481	no_hits_f	---------	495.545	1109.63	2.23921
Brapa_ESTC017615	AT2G40116	Symbols: | phosphoinositide-specific phospholipase C family protein | chr2:16758860-16761389 FORWARD	481.653	1070.9	2.22338
Brapa_ESTC037983	AT2G37320	Symbols: | pentatricopeptide (PPR) repeat-containing protein | chr2:15674302-15675804 FORWARD	478.88	1060.21	2.21394
Brapa_ESTC042602	AT3G05270	Symbols: | similar to myosin heavy chain-related [Arabidopsis thaliana] (TAIR:AT1G77580.2); similar to Protein of unknown function DUF869, plant [Medicago truncatula] (GB:ABE86171.1); contains InterPro domain DNA topoisomerases I, dispensable insert, eukaryotic-type; (InterPro:IPR009054); contains InterPro domain Spectrin repeat; (InterPro:IPR002017); contains InterPro domain t-snare; (InterPro:I…	482.859	1068.29	2.21243
Brapa_ESTC017147	AT3G28007	Symbols: | nodulin MtN3 family protein | chr3:10409480-10410870 REVERSE	475.725	1044.42	2.19543
Brapa_ESTC044823	AT4G32560	| Symbols: | paramyosin-related | chr4:15713872-15716041 FORWARD	494.728	1082.82	2.18872
Brapa_ESTC000474	no_hits_f	---------	496.806	1086.51	2.18699
Brapa_ESTC049448	AT4G35110	Symbols: | similar to unknown protein [Arabidopsis thaliana] (TAIR:AT2G16900.1); similar to pEARLI 4 gene product (GB:AAC37472.1); contains InterPro domain Arabidopsis phospholipase-like; (InterPro:IPR007942) | chr4:16712665-16714230 REVERSE	474.661	1037.53	2.18583
Brapa_ESTC031074	AT1G73360	Symbols: | homeobox-leucine zipper family protein / lipid-binding START domain-containing protein | chr1:27582554-27585481 REVERSE	498.491	1089.56	2.18572
Brapa_ESTC036761	AT4G17530	Symbols: AtRab1C, AtRABD2c, RAB1C | RAB1C; GTP binding | chr4:9773734-9775437 REVERSE	481.474	1050.4	2.18163
Brapa_ESTC030153	AT1G79180	Symbols: AtMYB63 | AtMYB63 (myb domain protein 63); DNA binding / transcription factor | chr1:29791402-29792482 FORWARD	470.144	1023.06	2.17606
Brapa_ESTC009660	AT5G27395	| Symbols: | protein translocase | chr5:9671848-9674088 REVERSE	480.392	1039.95	2.16479
Brapa_ESTC020598	AT3G26700	Symbols: | protein kinase family protein | chr3:9811906-9813593 FORWARD	482.064	1036.68	2.1505
Brapa_ESTC001516	AT1G72290	Symbols: | trypsin and protease inhibitor family protein / Kunitz family protein | chr1:27219514-27220161 FORWARD	481.138	1027.79	2.13616
Brapa_ESTC014607	AT4G38090	Symbols: | similar to Os08g0478100 [Oryza sativa (japonica cultivar-group)] (GB:NP_001062049.1); similar to hypothetical protein TTC0689 [Thermus thermophilus HB27] (GB:YP_004664.1); contains InterPro domain Protein of unknown function UPF0029; (InterPro:IPR001498) | chr4:17883751-17884696 REVERSE	484.344	1033.73	2.13429
Brapa_ESTC009784	AT3G28930	Symbols: AIG2 | AIG2 (AVRRPT2-INDUCED GENE 2) | chr3:10961127-10961965 REVERSE	487.295	1035.57	2.12514
Brapa_ESTC030690	AT5G15160	| Symbols: | bHLH family protein | chr5:4921490-4922556 REVERSE	488.531	1027.11	2.10245
Brapa_ESTC047101	AT3G14420	Symbols: | (S)-2-hydroxy-acid oxidase, peroxisomal, putative / glycolate oxidase, putative / short chain alpha-hydroxy acid oxidase, putative | chr3:4821906-4823906 FORWARD	492.769	1034.06	2.09847
Brapa_ESTC032915	AT3G24110	Symbols: | calcium-binding EF hand family protein | chr3:8704436-8705420 REVERSE	479.249	1005.68	2.09845
Brapa_ESTC048883	AT5G16480	Symbols: | tyrosine specific protein phosphatase family protein | chr5:5381337-5382621 REVERSE	492.168	1022.79	2.07813
Brapa_ESTC010085	AT5G63490	Symbols: | CBS domain-containing protein / octicosapeptide/Phox/Bemp1 (PB1) domain-containing protein | chr5:25435942-25439196 REVERSE	498.265	1030.8	2.06878
Brapa_ESTC039852	AT1G20890	Symbols: | similar to unknown protein [Arabidopsis thaliana] (TAIR:AT1G76480.1); similar to Fibronectin, type III-like fold [Medicago truncatula] (GB:ABE92861.1) | chr1:7266077-7267049 REVERSE	489.738	1007.07	2.05634
