# Supplementary material for: Identification of Yellow Pigmentation Genes in Brassica rapa ssp. pekinensis Using Br300 Microarray
Source: Int J Genomics. 2014 Dec 31;2014:204969. doi: 10.1155/2014/204969 (PMC4297637; doi:10.1155/2014/204969)
Supplement: Supplementary file 1 — In this study, we used Br300K B. rapa microarray and identified three genes as functionally novel genes that involved in yellow color pigmentation. Supplementary figures (Figure S1 to S3) explains the information about plant materials and correlation coefficient of two experimental results. The three identified transcription factor genes are specifically expressed and confirmed their relatedness in yellow pigmentation. Table S1 to S9 supports our results and provides detailed annotation information of some differentially expressed genes. [file 204969.f1.zip › mat.204969.v2/Table S7.xls]

## Sheet: Table
Table S7. Genes specifically expressed in white inner leaves.
Br_SEQ_ID	A. thaliana locus	A. thaliana_homologue_Description	PI value		Fold change
			White leaves	Yellow leaves	Y/W	W/Y
Brapa_ESTC048544	no_hits_f	---------	2635.45	27.159	0.0103053	97.0378
Brapa_ESTC002914	no_hits_f	---------	5441.39	62.5249	0.0114906	87.0276
Brapa_ESTC028228	no_hits_f	---------	1891.64	21.9709	0.0116147	86.0975
Brapa_ESTC024359	AT4G36010	Symbols: | pathogenesis-related thaumatin family protein | chr4:17039475-17040979 REVERSE	7666.52	125.928	0.0164257	60.8802
Brapa_ESTC006100	AT2G33380	Symbols: RD20 | RD20 (RESPONSIVE TO DESSICATION 20); calcium ion binding | chr2:14152060-14153450 REVERSE	3380.7	55.8581	0.0165226	60.523
Brapa_ESTC004379	AT1G76930	Symbols: ORG5, ATEXT1, ATEXT4 | ATEXT4 (EXTENSIN 4) | chr1:28900343-28901747 REVERSE	6169.21	103.653	0.0168017	59.5179
Brapa_ESTC005000	AT2G22860	Symbols: ATPSK2 | ATPSK2 (PHYTOSULFOKINE 2 PRECURSOR); growth factor | chr2:9744746-9745157 FORWARD	1669.54	28.3767	0.0169967	58.8349
Brapa_ESTC001296	AT4G12545	Symbols: | protease inhibitor/seed storage/lipid transfer protein (LTP) family protein | chr4:7434257-7434583 FORWARD	2140.13	48.7141	0.0227622	43.9325
Brapa_ESTC028190	AT4G37450	Symbols: ATAGP18, AGP18 | AGP18 (Arabinogalactan protein 18) | chr4:17605920-17606728 REVERSE	5264.27	122.464	0.0232632	42.9863
Brapa_ESTC012393	AT5G09570	Symbols: | similar to unknown protein [Arabidopsis thaliana] (TAIR:AT5G64400.1); similar to Os03g0685500 [Oryza sativa (japonica cultivar-group)] (GB:NP_001050926.1); similar to unknown [Hyacinthus orientalis] (GB:AAS21010.1); contains InterPro domain CHCH; (InterPro:IPR010625) | chr5:2970734-2971971 FORWARD	2425.35	67.4873	0.0278258	35.9379
Brapa_ESTC002528	AT5G20230	Symbols: BCB, ATBCB | ATBCB (ARABIDOPSIS BLUE-COPPER-BINDING PROTEIN); copper ion binding | chr5:6826628-6827410 FORWARD	2005.7	59.921	0.0298754	33.4724
Brapa_ESTC048543	no_hits_f	---------	1673.76	50.167	0.0299726	33.3638
Brapa_ESTC047475	AT3G19390	Symbols: | cysteine proteinase, putative / thiol protease, putative | chr3:6723030-6724774 FORWARD	4945.56	170.707	0.0345172	28.971
Brapa_ESTC048773	no_hits_f	---------	9709.93	339.625	0.0349771	28.5902
Brapa_ESTC025376	AT1G78410	Symbols: | VQ motif-containing protein | chr1:29507621-29507947 FORWARD	1247.88	46.4395	0.0372147	26.8711
Brapa_ESTC015242	AT1G02400	Symbols: ATGA2OX6, DTA1 | ATGA2OX6/DTA1 (GIBBERELLIN 2-OXIDASE 6); gibberellin 2-beta-dioxygenase | chr1:486964-489391 FORWARD	1200.1	46.0051	0.0383344	26.0862
Brapa_ESTC028154	no_hits_f	---------	4575.67	179.016	0.0391235	25.5601
Brapa_ESTC029475	no_hits_f	---------	4622.04	183.42	0.0396838	25.1992
Brapa_ESTC028145	AT3G22231	Symbols: PCC1 | PCC1 (PATHOGEN AND CIRCADIAN CONTROLLED 1) | chr3:7846087-7846570 REVERSE	1616.25	66.8521	0.0413625	24.1765
Brapa_ESTC049767	AT3G27560	Symbols: ATN, ATN1 | ATN1; kinase/ protein threonine/tyrosine kinase | chr3:10211834-10213744 REVERSE	3499.49	148.302	0.0423782	23.5971
Brapa_ESTC005595	AT1G01470	Symbols: LSR3, LEA14 | LEA14 (LATE EMBRYOGENESIS ABUNDANT 14) | chr1:172295-172826 REVERSE	6022.69	255.889	0.0424875	23.5363
Brapa_ESTC005069	AT1G21310	Symbols: RSH, ATEXT3 | ATEXT3 (EXTENSIN 3); structural constituent of cell wall | chr1:7453681-7454976 REVERSE	4778.89	210.067	0.0439573	22.7494
Brapa_ESTC049132	no_hits_f	---------	7337.93	324.405	0.0442093	22.6197
Brapa_ESTC027915	AT2G18915	Symbols: ADO2, LKP2 | LKP2 (LOV KELCH PROTEIN 2); ubiquitin-protein ligase | chr2:8201874-8204337 REVERSE	5400.31	242.891	0.0449772	22.2335
Brapa_ESTC048666	no_hits_f	---------	1893.58	87.3374	0.0461229	21.6812
Brapa_ESTC003127	AT1G76930	Symbols: ORG5, ATEXT1, ATEXT4 | ATEXT4 (EXTENSIN 4) | chr1:28900343-28901747 REVERSE	2999.73	138.776	0.0462628	21.6156
Brapa_ESTC002695	AT1G80440	Symbols: | kelch repeat-containing F-box family protein | chr1:30246655-30247719 FORWARD	3434.51	160.939	0.0468594	21.3404
Brapa_ESTC002756	AT4G02380	Symbols: ATLEA5, SAG21 | SAG21 (SENESCENCE-ASSOCIATED GENE 21) | chr4:1046414-1046807 REVERSE	1207.62	58.5751	0.0485046	20.6166
Brapa_ESTC015347	AT1G12200	Symbols: | flavin-containing monooxygenase family protein / FMO family protein | chr1:4137625-4139833 FORWARD	6506.7	336.24	0.051676	19.3514
Brapa_ESTC004067	AT3G12580	Symbols: HSP70 | HSP70 (heat shock protein 70); ATP binding | chr3:3991494-3993696 REVERSE	5222.11	273.981	0.0524656	19.0601
Brapa_ESTC048823	no_hits_f	---------	2787.27	146.467	0.0525486	19.03
Brapa_ESTC048774	no_hits_f	---------	4531.27	240.225	0.0530149	18.8626
Brapa_ESTC005841	AT5G66250	| Symbols: | kinectin-related | chr5:26486276-26487602 FORWARD	2367.58	126.324	0.0533557	18.7421
Brapa_ESTC032631	no_hits_f	---------	6260.53	337.387	0.0538911	18.5559
Brapa_ESTC036168	AT3G51000	Symbols: | epoxide hydrolase, putative | chr3:18956239-18957480 REVERSE	1931.88	104.563	0.054125	18.4758
Brapa_ESTC004387	no_hits_f	---------	6085.48	331.136	0.0544141	18.3776
Brapa_ESTC013598	AT5G11630	Symbols: | similar to unknown protein [Arabidopsis thaliana] (TAIR:AT4G17310.1); similar to conserved hypothetical protein [Medicago truncatula] (GB:ABE78369.1) | chr5:3740546-3740910 FORWARD	1787.93	97.8978	0.0547548	18.2632
Brapa_ESTC035678	AT4G15390	Symbols: | transferase family protein | chr4:8792941-8794281 REVERSE	3155.59	181.883	0.0576383	17.3496
Brapa_ESTC007301	AT3G30280	Symbols: | transferase family protein | chr3:11916845-11918176 FORWARD	4387.72	256.078	0.0583624	17.1343
Brapa_ESTC029431	AT1G76930	Symbols: ORG5, ATEXT1, ATEXT4 | ATEXT4 (EXTENSIN 4) | chr1:28900343-28901747 REVERSE	6042.33	364.03	0.0602466	16.5984
Brapa_ESTC039985	AT1G22770	| Symbols: FB, GI | GI (GIGANTEA) | chr1:8062387-8067436 FORWARD	5882.49	356.328	0.0605743	16.5086
Brapa_ESTC001351	AT1G20620	Symbols: SEN2, CAT3 | CAT3 (CATALASE 3); catalase | chr1:7143132-7146183 FORWARD	1742.3	105.63	0.0606268	16.4944
Brapa_ESTC032329	AT4G03590	Symbols: | similar to unknown protein [Arabidopsis thaliana] (TAIR:AT4G03570.1); contains InterPro domain Arabidopsis thaliana cystatin-related protein; (InterPro:IPR006525) | chr4:1600778-1602948 REVERSE	3372.95	205.265	0.0608562	16.4322
Brapa_ESTC026318	AT4G19230	Symbols: CYP707A1 | CYP707A1 (cytochrome P450, family 707, subfamily A, polypeptide 1); oxygen binding | chr4:10521535-10523528 FORWARD	2414.56	147.268	0.0609917	16.3957
Brapa_ESTC003202	AT4G39090	Symbols: RD19A, EMB3005, RD19 | RD19 (RESPONSIVE TO DEHYDRATION 19); cysteine-type peptidase | chr4:18215820-18217320 REVERSE	1047.99	64.8002	0.0618328	16.1726
Brapa_ESTC029996	AT1G67330	Symbols: | similar to unknown protein [Arabidopsis thaliana] (TAIR:AT1G27930.1); similar to hypothetical protein MA4_111B14.64 [Musa acuminata] (GB:ABF72010.1); contains InterPro domain Protein of unknown function DUF579, plant; (InterPro:IPR006514) | chr1:25217781-25218656 FORWARD	1724.43	109.88	0.0637196	15.6938
Brapa_ESTC001257	AT4G09030	Symbols: ATAGP10, AGP10 | AGP10 (Arabinogalactan protein 10) | chr4:5792246-5792629 FORWARD	6475.25	417.348	0.0644528	15.5152
Brapa_ESTC042064	AT2G38280	Symbols: ATAMPD, FAC1 | FAC1 (EMBRYONIC FACTOR1); AMP deaminase | chr2:16040845-16045871 REVERSE	1346.41	89.7047	0.0666251	15.0094
Brapa_ESTC006027	AT1G20620	Symbols: SEN2, CAT3 | CAT3 (CATALASE 3); catalase | chr1:7143132-7146183 FORWARD	1436.35	96.3857	0.0671046	14.9021
Brapa_ESTC029555	AT1G19770	Symbols: ATPUP14 | ATPUP14 (Arabidopsis thaliana purine permease 14); purine transporter | chr1:6832417-6833693 FORWARD	3221.57	216.491	0.0672005	14.8808
Brapa_ESTC001166	AT2G30490	Symbols: ATC4H, C4H, CYP73A5 | ATC4H (CINNAMATE-4-HYDROXYLASE) | chr2:13000938-13002760 REVERSE	4307.93	291.471	0.0676592	14.78
Brapa_ESTC006260	AT4G18210	Symbols: ATPUP10 | ATPUP10 (Arabidopsis thaliana purine permease 10); purine transporter | chr4:10076186-10077506 FORWARD	1509.43	105.707	0.0700311	14.2794
Brapa_ESTC024831	AT5G49520	Symbols: ATWRKY48, WRKY48 | WRKY48 (WRKY DNA-binding protein 48); transcription factor | chr5:20108116-20110093 FORWARD	5891.12	420.184	0.071325	14.0203
Brapa_ESTC035768	no_hits_f	---------	3172.01	226.602	0.071438	13.9982
Brapa_ESTC018709	AT5G23010	Symbols: IMS3, MAM1 | MAM1 (2-isopropylmalate synthase 3); 2-isopropylmalate synthase | chr5:7703176-7706772 FORWARD	2450.3	178.812	0.0729756	13.7032
Brapa_ESTC014892	AT2G28110	Symbols: FRA8 | FRA8 (FRAGILE FIBER8); transferase | chr2:11985101-11986718 REVERSE	1793.02	131.313	0.0732357	13.6546
Brapa_ESTC036728	AT1G54150	Symbols: | zinc finger (C3HC4-type RING finger) family protein | chr1:20219147-20220970 FORWARD	6335.36	464.656	0.0733433	13.6345
Brapa_ESTC005001	AT3G51660	Symbols: | macrophage migration inhibitory factor family protein / MIF family protein | chr3:19175208-19176055 REVERSE	1950.07	144.021	0.0738543	13.5402
Brapa_ESTC019232	AT5G63370	Symbols: | protein kinase family protein | chr5:25402180-25404018 REVERSE	1801.39	133.523	0.0741222	13.4912
Brapa_ESTC044176	AT4G18950	Symbols: | ankyrin protein kinase, putative | chr4:10375696-10378140 FORWARD	6050.32	455.558	0.0752949	13.2811
Brapa_ESTC006781	AT4G13940	Symbols: EMB1395, MEE58, SAHH, SAHH1, HOG1 | HOG1 (HOMOLOGY-DEPENDENT GENE SILENCING 1) | chr4:8054926-8056758 FORWARD	3091.48	234.963	0.0760034	13.1573
Brapa_ESTC035499	AT3G55430	Symbols: | glycosyl hydrolase family 17 protein / beta-1,3-glucanase, putative | chr3:20560783-20562981 REVERSE	2142.27	163.096	0.0761323	13.135
Brapa_ESTC001429	AT5G23950	Symbols: | C2 domain-containing protein | chr5:8082792-8083451 FORWARD	5606.85	428.269	0.0763832	13.0919
Brapa_ESTC015564	AT1G12200	Symbols: | flavin-containing monooxygenase family protein / FMO family protein | chr1:4137625-4139833 FORWARD	3739.05	288.063	0.0770418	12.98
Brapa_ESTC027762	AT1G10550	Symbols: XET, XTH33 | XTH33 (xyloglucan:xyloglucosyl transferase 33); hydrolase, acting on glycosyl bonds | chr1:3479258-3480958 REVERSE	2822.04	222.829	0.0789603	12.6646
Brapa_ESTC002795	AT2G45750	Symbols: | dehydration-responsive family protein | chr2:18849729-18852417 FORWARD	4657.4	371.028	0.0796642	12.5527
Brapa_ESTC011786	AT1G77520	Symbols: | O-methyltransferase family 2 protein | chr1:29135451-29136901 FORWARD	2536.65	203.969	0.0804088	12.4364
Brapa_ESTC028965	no_hits_f	---------	3547.24	290.963	0.0820252	12.1914
Brapa_ESTC025737	AT1G27200	Symbols: | similar to zinc finger (C3HC4-type RING finger) family protein [Arabidopsis thaliana] (TAIR:AT3G27330.1); similar to Os08g0121900 [Oryza sativa (japonica cultivar-group)] (GB:NP_001060883.1); similar to zinc finger (C3HC4-type RING finger) protein family-like [Oryza sativa (japonica cultivar-group)] (GB:BAD10590.1); contains InterPro domain Protein of unknown function DUF23; (InterPro:…	4099.9	336.311	0.0820291	12.1908
Brapa_ESTC013910	AT4G13770	Symbols: REF2, CYP83A1 | CYP83A1 (CYTOCHROME P450 83A1); oxygen binding | chr4:7990678-7992278 REVERSE	2749.79	230.018	0.0836493	11.9547
Brapa_ESTC028049	no_hits_f	---------	1877.44	159.067	0.0847255	11.8028
Brapa_ESTC006436	AT3G55430	Symbols: | glycosyl hydrolase family 17 protein / beta-1,3-glucanase, putative | chr3:20560783-20562981 REVERSE	1191.43	101.353	0.0850684	11.7553
Brapa_ESTC048924	no_hits_f	---------	2513.25	220.671	0.087803	11.3891
Brapa_ESTC019569	AT4G15396	Symbols: CYP702A6 | CYP702A6 (cytochrome P450, family 702, subfamily A, polypeptide 6); heme binding / iron ion binding / monooxygenase | chr4:8807574-8810419 FORWARD	4973.05	439.641	0.0884047	11.3116
Brapa_ESTC006034	AT5G18270	| Symbols: ANAC087 | ANAC087 | chr5:6041243-6042745 REVERSE	3719.24	330.209	0.088784	11.2633
Brapa_ESTC000736	AT2G16700	Symbols: ADF5 | ADF5 (ACTIN DEPOLYMERIZING FACTOR 5); actin binding | chr2:7251799-7252549 FORWARD	2858.93	254.049	0.0888616	11.2535
Brapa_ESTC005779	AT4G33920	Symbols: | protein phosphatase 2C family protein / PP2C family protein | chr4:16260881-16262708 FORWARD	3103.21	277.436	0.0894029	11.1853
Brapa_ESTC005503	AT3G59940	Symbols: | kelch repeat-containing F-box family protein | chr3:22153986-22155242 FORWARD	2750.2	246.832	0.0897506	11.142
Brapa_ESTC024467	AT4G31550	Symbols: ATWRKY11, WRKY11 | WRKY11 (WRKY DNA-binding protein 11); transcription factor | chr4:15290071-15291464 REVERSE	5082.1	457.136	0.0899502	11.1173
Brapa_ESTC020807	AT2G38995	Symbols: | similar to unknown protein [Arabidopsis thaliana] (TAIR:AT5G37300.1); similar to Protein of unknown function DUF1298 [Medicago truncatula] (GB:ABE82755.1); contains InterPro domain Protein of unknown function UPF0089; (InterPro:IPR004255); contains InterPro domain Protein of unknown function DUF1298; (InterPro:IPR009721) | chr2:16289244-16291778 FORWARD	2126.17	191.877	0.0902454	11.0809
Brapa_ESTC010199	AT5G58710	Symbols: ROC7 | ROC7 (rotamase CyP 7); peptidyl-prolyl cis-trans isomerase | chr5:23735066-23736721 FORWARD	4787.5	437	0.0912794	10.9554
Brapa_ESTC038998	AT4G23340	Symbols: | oxidoreductase, 2OG-Fe(II) oxygenase family protein | chr4:12195729-12196662 REVERSE	3959.85	363.882	0.0918929	10.8822
Brapa_ESTC033074	AT4G10380	Symbols: NIP5;1, NLM6, NLM8 | NIP5;1/NLM6/NLM8 (NOD26-like intrinsic protein 5;1); boron transporter/ water channel | chr4:6431526-6434506 REVERSE	3604.19	331.834	0.092069	10.8614
Brapa_ESTC012973	AT1G15330	Symbols: | CBS domain-containing protein | chr1:5274363-5275494 FORWARD	1073.45	99.0374	0.0922608	10.8388
Brapa_ESTC019697	AT4G23340	Symbols: | oxidoreductase, 2OG-Fe(II) oxygenase family protein | chr4:12195729-12196662 REVERSE	1577.92	146.763	0.0930104	10.7515
Brapa_ESTC009801	AT5G64750	Symbols: ABR1 | ABR1 (ABA REPRESSOR1); DNA binding / transcription factor | chr5:25908905-25910882 FORWARD	1260.16	118.435	0.0939841	10.6401
Brapa_ESTC030997	AT2G28110	Symbols: FRA8 | FRA8 (FRAGILE FIBER8); transferase | chr2:11985101-11986718 REVERSE	1243.96	117.349	0.094335	10.6005
Brapa_ESTC008854	AT5G48560	Symbols: | basic helix-loop-helix (bHLH) family protein | chr5:19701386-19704097 FORWARD	2931.06	276.905	0.0944726	10.5851
Brapa_ESTC004611	AT5G17620	Symbols: | similar to nuclear matrix protein 1 [Lycopersicon esculentum] (GB:AAK83083.1); contains InterPro domain Plant nuclear matrix 1; (InterPro:IPR010604) | chr5:5805936-5808457 REVERSE	2233.16	211.245	0.0945947	10.5714
Brapa_ESTC010353	AT1G67850	Symbols: | similar to unknown protein [Arabidopsis thaliana] (TAIR:AT1G13000.2); similar to Protein of unknown function DUF707 [Medicago truncatula] (GB:ABE91787.1); contains InterPro domain Protein of unknown function DUF707; (InterPro:IPR007877) | chr1:25442867-25445567 FORWARD	4048.33	383.366	0.0946973	10.56
Brapa_ESTC012577	AT4G39680	Symbols: | SAP domain-containing protein | chr4:18414598-18416932 REVERSE	3430.38	330.931	0.0964707	10.3658
Brapa_ESTC027898	AT4G01360	Symbols: | similar to BPS1 (BYPASS 1) [Arabidopsis thaliana] (TAIR:AT1G01550.2); similar to unknown [Solanum tuberosum] (GB:ABB16971.1) | chr4:565147-566193 FORWARD	1487.06	145.207	0.097647	10.241
Brapa_ESTC012118	AT3G15500	Symbols: ANAC055, ATNAC3 | ATNAC3 (ARABIDOPSIS NAC DOMAIN CONTAINING PROTEIN 55); transcription factor | chr3:5234738-5235889 FORWARD	5060.87	494.679	0.0977458	10.2306
Brapa_ESTC015203	AT5G63810	Symbols: BGAL10 | BGAL10 (beta-galactosidase 10); beta-galactosidase | chr5:25554468-25558541 FORWARD	1609.43	158.903	0.0987325	10.1284
Brapa_ESTC001631	AT1G12710	Symbols: ATPP2-A12 | ATPP2-A12 (Phloem protein 2-A12) | chr1:4326978-4328322 REVERSE	2132.97	211.027	0.0989358	10.1076
Brapa_ESTC008890	AT2G46830	Symbols: CCA1 | CCA1 (CIRCADIAN CLOCK ASSOCIATED 1); transcription factor | chr2:19253074-19255786 FORWARD	4510.43	448.74	0.0994894	10.0513
Brapa_ESTC003025	AT3G45140	Symbols: ATLOX2, LOX2 | LOX2 (LIPOXYGENASE 2) | chr3:16536422-16540218 FORWARD	1083.76	108.046	0.0996955	10.0305
Brapa_ESTC026207	AT3G03520	Symbols: | phosphoesterase family protein | chr3:837979-840518 REVERSE	1980	197.435	0.0997146	10.0286
Brapa_ESTC025098	AT2G25850	Symbols: | nucleotidyltransferase | chr2:11033126-11037518 REVERSE	3326.84	332.639	0.0999865	10.0014
Brapa_ESTC007362	AT2G45750	Symbols: | dehydration-responsive family protein | chr2:18849729-18852417 FORWARD	4847.75	485.969	0.100246	9.97543
Brapa_ESTC000592	AT3G17390	Symbols: SAMS3, MAT4, MTO3 | MTO3 (S-adenosylmethionine synthase 3); methionine adenosyltransferase | chr3:5952490-5953671 REVERSE	1889.9	189.516	0.100278	9.97225
Brapa_ESTC003452	AT3G52520	Symbols: | similar to unknown protein [Arabidopsis thaliana] (TAIR:AT5G06280.3) | chr3:19484461-19484862 FORWARD	1077.21	108.619	0.100834	9.91733
Brapa_ESTC006222	AT4G35970	Symbols: APX5 | APX5; L-ascorbate peroxidase/ peroxidase | chr4:17028654-17030208 FORWARD	4219.99	426.189	0.100993	9.90169
Brapa_ESTC001218	AT1G79470	Symbols: | inosine-5'-monophosphate dehydrogenase | chr1:29899665-29901554 REVERSE	1772.6	179.176	0.101081	9.89307
Brapa_ESTC025250	AT1G18580	Symbols: GAUT11 | GAUT11 (Galacturonosyltransferase 11); polygalacturonate 4-alpha-galacturonosyltransferase | chr1:6396137-6397383 FORWARD	4487.23	455.77	0.10157	9.84538
Brapa_ESTC007046	no_hits_f	---------	4429.16	453.391	0.102365	9.76896
Brapa_ESTC001139	AT3G55430	Symbols: | glycosyl hydrolase family 17 protein / beta-1,3-glucanase, putative | chr3:20560783-20562981 REVERSE	1206.6	123.86	0.102652	9.74164
Brapa_ESTC020229	AT4G19230	Symbols: CYP707A1 | CYP707A1 (cytochrome P450, family 707, subfamily A, polypeptide 1); oxygen binding | chr4:10521535-10523577 FORWARD	4099.14	421.603	0.102852	9.72275
Brapa_ESTC044798	AT4G32340	| Symbols: | binding | chr4:15612747-15614225 REVERSE	1756.05	180.952	0.103045	9.70451
Brapa_ESTC023799	AT2G30250	Symbols: ATWRKY25, WRKY25 | WRKY25 (WRKY DNA-binding protein 25); transcription factor | chr2:12910630-12912166 REVERSE	3144.34	330.315	0.105051	9.51922
Brapa_ESTC014490	AT3G42950	Symbols: | glycoside hydrolase family 28 protein / polygalacturonase (pectinase) family protein | chr3:15026371-15028788 FORWARD	1984.01	209.279	0.105483	9.48022
Brapa_ESTC006958	AT5G61380	Symbols: APRR1, PRR1, TOC1 | TOC1 (TIMING OF CAB1 1); transcription regulator | chr5:24692766-24695402 FORWARD	3611.44	384.422	0.106446	9.39447
Brapa_ESTC011656	AT1G18210	Symbols: | calcium-binding protein, putative | chr1:6268266-6268778 REVERSE	4473.11	477.472	0.106743	9.36832
Brapa_ESTC014295	AT5G62520	Symbols: SRO5 | SRO5 (SIMILAR TO RCD ONE 5); NAD+ ADP-ribosyltransferase | chr5:25115297-25116490 FORWARD	1706.55	183.715	0.107653	9.28912
Brapa_ESTC023158	AT1G09530	Symbols: PIF3, POC1, PAP3 | PIF3 (PHYTOCHROME INTERACTING FACTOR 3); DNA binding / transcription factor/ transcription regulator | chr1:3077218-3079369 FORWARD	2825.54	304.615	0.107808	9.27577
Brapa_ESTC015237	AT1G05010	Symbols: EAT1, EFE | EFE (ethylene forming enzyme) | chr1:1431418-1432694 REVERSE	1229.82	133.161	0.108277	9.23559
Brapa_ESTC006756	AT3G49490	Symbols: | similar to hypothetical protein MtrDRAFT_AC119415g11v1 [Medicago truncatula] (GB:ABE85164.1) | chr3:18355911-18359633 REVERSE	4404.36	478.649	0.108676	9.20165
Brapa_ESTC017150	AT1G12200	Symbols: | flavin-containing monooxygenase family protein / FMO family protein | chr1:4137625-4139833 FORWARD	4279.79	465.373	0.108737	9.19647
Brapa_ESTC041455	no_hits_f	---------	3670.34	404.867	0.110308	9.06554
Brapa_ESTC027765	AT1G14780	Symbols: | similar to unknown protein [Arabidopsis thaliana] (TAIR:AT4G24290.2); similar to Membrane attack complex component/perforin/complement C9 [Medicago truncatula] (GB:ABE92593.1); similar to Os06g0251100 [Oryza sativa (japonica cultivar-group)] (GB:NP_001057295.1); similar to Os02g0736300 [Oryza sativa (japonica cultivar-group)] (GB:NP_001048052.1); contains InterPro domain Membrane attac…	3014.29	333.134	0.110518	9.04828
Brapa_ESTC030802	no_hits_f	---------	1330.34	148.974	0.111982	8.93001
Brapa_ESTC035563	AT3G55890	Symbols: | yippee family protein | chr3:20751887-20752847 FORWARD	1996.38	224.38	0.112393	8.89732
Brapa_ESTC051638	AT5G60300	Symbols: | lectin protein kinase family protein | chr5:24282088-24285199 FORWARD	1779.46	200.689	0.112781	8.86675
Brapa_ESTC023981	AT3G61400	Symbols: | 2-oxoglutarate-dependent dioxygenase, putative | chr3:22729931-22731372 FORWARD	2173.52	245.349	0.112881	8.85889
Brapa_ESTC008566	AT4G31180	Symbols: | aspartyl-tRNA synthetase, putative / aspartate--tRNA ligase, putative | chr4:15156702-15159368 FORWARD	2103.33	239.176	0.113713	8.79407
Brapa_ESTC018020	AT1G07360	Symbols: | zinc finger (CCCH-type) family protein / RNA recognition motif (RRM)-containing protein | chr1:2260560-2262793 REVERSE	2224.35	256.75	0.115427	8.66349
Brapa_ESTC002919	AT2G22470	Symbols: ATAGP2, AGP2 | AGP2 (ARABINOGALACTAN-PROTEIN 2) | chr2:9545480-9545875 REVERSE	3391.17	394.518	0.116337	8.59573
Brapa_ESTC016980	AT3G26730	Symbols: | zinc finger (C3HC4-type RING finger) family protein | chr3:9825007-9828507 FORWARD	1518.66	177.74	0.117037	8.54428
Brapa_ESTC000609	AT1G18740	Symbols: | similar to unknown protein [Arabidopsis thaliana] (TAIR:AT1G74450.1); similar to Protein of unknown function DUF793 [Medicago truncatula] (GB:ABE83157.1); contains InterPro domain Protein of unknown function DUF793; (InterPro:IPR008511) | chr1:6464116-6465264 FORWARD	2466.93	293.935	0.11915	8.39277
Brapa_ESTC016725	AT4G39370	Symbols: UBP27 | UBP27 (UBIQUITIN-SPECIFIC PROTEASE 27); ubiquitin-specific protease | chr4:18306386-18308619 FORWARD	2087.51	252.824	0.121113	8.25677
Brapa_ESTC010665	AT1G28290	Symbols: | pollen Ole e 1 allergen and extensin family protein | chr1:9889318-9890830 REVERSE	3666.3	446.776	0.12186	8.20613
Brapa_ESTC017386	AT5G49650	Symbols: | xylulose kinase, putative | chr5:20170124-20172800 FORWARD	2776.35	339.202	0.122176	8.18495
Brapa_ESTC035074	AT3G57710	Symbols: | protein kinase family protein | chr3:21397210-21398265 REVERSE	1154.61	144.735	0.125354	7.97741
Brapa_ESTC018270	AT3G04090	Symbols: SIP1;1, SIP1A | SIP1;1 (SMALL AND BASIC INTRINSIC PROTEIN 1A) | chr3:1072347-1074038 REVERSE	1816.58	229.749	0.126473	7.9068
Brapa_ESTC019184	AT4G13350	Symbols: | human Rev interacting-like protein-related / hRIP protein-related | chr4:7770166-7773317 REVERSE	2203.19	281.729	0.127873	7.82025
Brapa_ESTC051094	no_hits_f	---------	3133.4	402.971	0.128605	7.77575
Brapa_ESTC028180	AT1G21310	Symbols: RSH, ATEXT3 | ATEXT3 (EXTENSIN 3); structural constituent of cell wall | chr1:7453681-7454976 REVERSE	2015.3	260.063	0.129044	7.74928
Brapa_ESTC034058	AT1G40087	Symbols: | similar to fructose-6-phosphate 2-kinase-related / fructose-2,6-bisphosphatase-related [Arabidopsis thaliana] (TAIR:AT3G30200.1); similar to IMP dehydrogenase/GMP reductase [Medicago truncatula] (GB:ABE87262.1) | chr1:15002203-15004309 REVERSE	1457.28	188.694	0.129484	7.72298
Brapa_ESTC023657	AT1G67800	Symbols: | protein binding / zinc ion binding | chr1:25424692-25426900 REVERSE	1943.05	252.702	0.130054	7.6891
Brapa_ESTC015353	AT1G29690	Symbols: CAD1 | CAD1 (CONSTITUTIVELY ACTIVATED CELL DEATH 1); oxidoreductase | chr1:10379296-10381847 REVERSE	3774.86	492.905	0.130576	7.65839
Brapa_ESTC011961	AT1G07350	Symbols: | transformer serine/arginine-rich ribonucleoprotein, putative | chr1:2257730-2260099 REVERSE	1216.7	159.284	0.130915	7.63856
Brapa_ESTC005981	AT1G45688	Symbols: | similar to unknown protein [Arabidopsis thaliana] (TAIR:AT5G42860.1); similar to H0814G11.12 [Oryza sativa (indica cultivar-group)] (GB:CAJ86345.1); similar to CAA30379.1 protein [Oryza sativa] (GB:CAB53482.1) | chr1:17193942-17195310 FORWARD	3136.55	413.325	0.131777	7.58858
Brapa_ESTC016291	AT2G38280	Symbols: ATAMPD, FAC1 | FAC1 (EMBRYONIC FACTOR1); AMP deaminase | chr2:16040845-16045871 REVERSE	1048.07	138.786	0.132421	7.5517
Brapa_ESTC003343	AT3G14350	Symbols: | leucine-rich repeat transmembrane protein kinase, putative | chr3:4783122-4787006 REVERSE	1713.23	227.304	0.132676	7.53717
Brapa_ESTC006747	AT5G08670	Symbols: | ATP synthase beta chain 1, mitochondrial | chr5:2818396-2821150 REVERSE	2514.06	335.942	0.133625	7.48361
Brapa_ESTC028833	no_hits_f	---------	1310.43	175.262	0.133744	7.47698
Brapa_ESTC002975	AT1G19180	Symbols: | similar to unknown protein [Arabidopsis thaliana] (TAIR:AT1G74950.1); similar to PnFL-2 [Ipomoea nil] (GB:AAG49896.1); contains InterPro domain ZIM; (InterPro:IPR010399) | chr1:6622303-6623262 FORWARD	2658.56	356.247	0.134	7.46269
Brapa_ESTC004878	AT3G18280	Symbols: | protease inhibitor/seed storage/lipid transfer protein (LTP) family protein | chr3:6267108-6267398 FORWARD	3258.34	437.947	0.134408	7.44003
Brapa_ESTC013187	AT5G37540	Symbols: | aspartyl protease family protein | chr5:14930092-14931420 FORWARD	2310.11	312.091	0.135098	7.40204
Brapa_ESTC013907	AT4G30170	| Symbols: | peroxidase, putative | chr4:14762928-14764488 FORWARD	1931.24	262.626	0.135988	7.35358
Brapa_ESTC005703	AT2G23090	Symbols: | similar to hypothetical protein [Cicer arietinum] (GB:CAA10129.1) | chr2:9836737-9837354 REVERSE	2295.84	315.305	0.137338	7.28133
Brapa_ESTC021534	AT3G29190	Symbols: | terpene synthase/cyclase family protein | chr3:11160610-11163800 REVERSE	2685.62	369.026	0.137408	7.27759
Brapa_ESTC020607	AT2G44410	Symbols: | protein binding / zinc ion binding | chr2:18335949-18337190 FORWARD	3254.64	447.445	0.137479	7.27383
Brapa_ESTC045101	AT4G36210	Symbols: | similar to unknown protein [Arabidopsis thaliana] (TAIR:AT2G18100.1); similar to expressed protein [Oryza sativa (japonica cultivar-group)] (GB:ABF93615.1); similar to Os03g0112800 [Oryza sativa (japonica cultivar-group)] (GB:NP_001048731.1); contains InterPro domain Protein of unknown function DUF726; (InterPro:IPR007941) | chr4:17130954-17134305 FORWARD	2218.23	305.041	0.137515	7.27191
Brapa_ESTC002395	AT1G02870	Symbols: | similar to hypothetical protein MtrDRAFT_AC161032g9v1 [Medicago truncatula] (GB:ABE85046.1) | chr1:637401-638603 REVERSE	2483.7	342.238	0.137794	7.25723
Brapa_ESTC018536	AT2G48110	Symbols: | structural constituent of ribosome | chr2:19680440-19686564 FORWARD	1592.53	219.649	0.137925	7.25034
Brapa_ESTC016857	AT1G18450	Symbols: ARP4, ATARP4 | ATARP4 (ACTIN-RELATED PROTEIN 4); structural constituent of cytoskeleton | chr1:6348192-6351759 FORWARD	1244.03	171.75	0.138059	7.24326
Brapa_ESTC025151	AT2G03820	Symbols: | nonsense-mediated mRNA decay NMD3 family protein | chr2:1165146-1166696 REVERSE	2196.26	303.439	0.138162	7.2379
Brapa_ESTC024622	AT4G32600	Symbols: | zinc finger (C3HC4-type RING finger) family protein | chr4:15724016-15725743 FORWARD	2418.28	335.574	0.138766	7.2064
Brapa_ESTC002126	AT5G61380	Symbols: APRR1, PRR1, TOC1 | TOC1 (TIMING OF CAB1 1); transcription regulator | chr5:24692766-24695402 FORWARD	1443.4	200.361	0.138812	7.204
Brapa_ESTC032505	AT5G19590	Symbols: | similar to unknown protein [Arabidopsis thaliana] (TAIR:AT4G02360.1); similar to protein of unknown function [Oryza sativa (japonica cultivar-group)] (GB:AAT76982.1); similar to unknown protein [Oryza sativa (japonica cultivar-group)] (GB:AAO38494.1); similar to Os01g0595400 [Oryza sativa (japonica cultivar-group)] (GB:NP_001043469.1); contains InterPro domain Protein of unknown functi…	3267.46	453.569	0.138814	7.20389
Brapa_ESTC024828	AT1G73200	Symbols: | similar to unknown protein [Arabidopsis thaliana] (TAIR:AT1G17820.1); similar to unknown protein [Oryza sativa (japonica cultivar-group)] (GB:BAD23057.1); similar to Os02g0827500 [Oryza sativa (japonica cultivar-group)] (GB:NP_001048594.1); contains InterPro domain Pleckstrin homology-type; (InterPro:IPR011993) | chr1:27527115-27530234 REVERSE	2858.61	398.117	0.139269	7.18033
Brapa_ESTC031023	no_hits_f	---------	2511.98	351.752	0.14003	7.14134
Brapa_ESTC007736	AT5G65750	Symbols: | 2-oxoglutarate dehydrogenase E1 component, putative / oxoglutarate decarboxylase, putative / alpha-ketoglutaric dehydrogenase, putative | chr5:26321438-26325173 FORWARD	1544.75	218.517	0.141458	7.06924
Brapa_ESTC017207	AT1G79600	| Symbols: | ABC1 family protein | chr1:29954998-29957409 REVERSE	1526.5	216.807	0.142029	7.04082
Brapa_ESTC032615	no_hits_f	---------	3419.68	486.259	0.142194	7.03263
Brapa_ESTC047685	AT3G24540	Symbols: | protein kinase family protein | chr3:8952910-8955628 FORWARD	1486.91	211.929	0.14253	7.01608
Brapa_ESTC018826	AT1G52290	Symbols: | protein kinase family protein | chr1:19473920-19476031 REVERSE	1097.53	156.555	0.142643	7.01051
Brapa_ESTC010455	AT3G29270	Symbols: | similar to zinc finger (C3HC4-type RING finger) family protein [Arabidopsis thaliana] (TAIR:AT1G69330.1); similar to Os03g0211100 [Oryza sativa (japonica cultivar-group)] (GB:NP_001049345.1); similar to Os03g0427100 [Oryza sativa (japonica cultivar-group)] (GB:NP_001050412.1); contains InterPro domain Zinc finger, RING-type; (InterPro:IPR001841) | chr3:11236563-11237354 FORWARD	2634.88	375.944	0.14268	7.0087
Brapa_ESTC023970	AT5G64930	Symbols: HYS1, CPR5 | CPR5 (CONSTITUTIVE EXPRESSION OF PR GENES 5) | chr5:25963111-25965547 REVERSE	3086.93	442.154	0.143234	6.98157
Brapa_ESTC013396	AT3G16310	Symbols: | mitotic phosphoprotein N' end (MPPN) family protein | chr3:5526599-5528112 REVERSE	2030.33	291.057	0.143355	6.97571
Brapa_ESTC041873	no_hits_f	---------	1582.51	227.613	0.14383	6.95263
Brapa_ESTC015151	AT3G04610	Symbols: FLK | FLK (FLOWERING LOCUS KH DOMAIN); nucleic acid binding | chr3:1250768-1254278 REVERSE	1694	244.186	0.144148	6.93733
Brapa_ESTC001188	no_hits_f	---------	1727.26	251.699	0.145722	6.8624
Brapa_ESTC011198	AT3G48990	Symbols: | AMP-dependent synthetase and ligase family protein | chr3:18170016-18172279 REVERSE	2954.32	434.929	0.147218	6.79265
Brapa_ESTC051154	no_hits_f	---------	1108.42	164.931	0.148798	6.72051
Brapa_ESTC047012	no_hits_f	---------	2338.75	350.806	0.149997	6.66679
Brapa_ESTC014172	AT4G16144	Symbols: | similar to mov34 family protein [Arabidopsis thaliana] (TAIR:AT1G48790.1); similar to Os01g0499300 [Oryza sativa (japonica cultivar-group)] (GB:NP_001043127.1); similar to ALM beta-like [Oryza sativa (japonica cultivar-group)] (GB:BAD72364.1); similar to Os01g0338200 [Oryza sativa (japonica cultivar-group)] (GB:NP_001042943.1); contains InterPro domain Mov34/MPN/PAD-1; (InterPro:IPR000…	1466.53	222.413	0.151659	6.59372
Brapa_ESTC027444	no_hits_f	---------	3110.55	475.356	0.152821	6.54362
Brapa_ESTC003065	AT5G14920	Symbols: | gibberellin-regulated family protein | chr5:4826601-4827764 FORWARD	1928.34	294.93	0.152945	6.5383
Brapa_ESTC020634	AT1G06460	Symbols: ACD31.2, ACD32.1 | ACD32.1 (ALPHA-CRYSTALLIN DOMAIN 31.2) | chr1:1967307-1969413 REVERSE	2591.36	397.997	0.153586	6.511
Brapa_ESTC025707	AT3G63210	Symbols: MARD1 | MARD1 (MEDIATOR OF ABA-REGULATED DORMANCY 1) | chr3:23364994-23365881 REVERSE	1318.74	202.678	0.153691	6.50658
Brapa_ESTC049088	AT3G54000	Symbols: | similar to unknown protein [Arabidopsis thaliana] (TAIR:AT5G59050.1); similar to Os05g0453300 [Oryza sativa (japonica cultivar-group)] (GB:NP_001055714.1); similar to Os01g0850000 [Oryza sativa (japonica cultivar-group)] (GB:NP_001044811.1); similar to IMP dehydrogenase/GMP reductase [Medicago truncatula] (GB:ABD33149.1) | chr3:20007735-20009175 FORWARD	2890.4	445.316	0.154067	6.49067
Brapa_ESTC032331	AT4G03570	Symbols: | similar to unknown protein [Arabidopsis thaliana] (TAIR:AT4G03590.1); contains InterPro domain Arabidopsis thaliana cystatin-related protein; (InterPro:IPR006525) | chr4:1590411-1594103 REVERSE	1704.39	264.104	0.154955	6.45348
Brapa_ESTC016036	AT1G04080	Symbols: | hydroxyproline-rich glycoprotein family protein | chr1:1051802-1056549 FORWARD	2942.8	461.292	0.156753	6.37947
Brapa_ESTC014841	AT2G20810	Symbols: GAUT10, LGT4 | GAUT10/LGT4 (Galacturonosyltransferase 10); polygalacturonate 4-alpha-galacturonosyltransferase/ transferase, transferring glycosyl groups / transferase, transferring hexosyl groups | chr2:8965008-8966691 FORWARD	1300.74	204.139	0.156941	6.37183
Brapa_ESTC011658	AT3G19390	Symbols: | cysteine proteinase, putative / thiol protease, putative | chr3:6723030-6724774 FORWARD	3024.33	475.576	0.15725	6.3593
Brapa_ESTC017096	AT1G12000	Symbols: | pyrophosphate--fructose-6-phosphate 1-phosphotransferase beta subunit, putative / pyrophosphate-dependent 6-phosphofructose-1-kinase, putative | chr1:4050157-4053725 REVERSE	2305.72	362.9	0.157391	6.3536
Brapa_ESTC016276	AT3G55200	Symbols: | splicing factor, putative | chr3:20471510-20475338 FORWARD	2048.55	323.394	0.157865	6.33453
Brapa_ESTC010631	AT4G20380	Symbols: LSD1 | LSD1 (LESION SIMULATING DISEASE) | chr4:11005023-11006449 FORWARD	1227.59	194.891	0.158759	6.29885
Brapa_ESTC010438	no_hits_f	---------	2045.13	329.518	0.161123	6.20643
Brapa_ESTC009436	AT2G21270	Symbols: | ubiquitin fusion degradation UFD1 family protein | chr2:9114922-9117093 FORWARD	1110.62	179.064	0.161229	6.20236
Brapa_ESTC028881	AT3G26730	Symbols: | zinc finger (C3HC4-type RING finger) family protein | chr3:9825007-9828507 FORWARD	2806.3	453.958	0.161764	6.18185
Brapa_ESTC047658	no_hits_f	---------	2078.26	336.709	0.162015	6.17227
Brapa_ESTC016109	AT5G20380	| Symbols: | transporter-related | chr5:6887938-6892360 REVERSE	2953.04	478.609	0.162073	6.17005
Brapa_ESTC018454	AT5G42720	Symbols: | glycosyl hydrolase family 17 protein | chr5:17147763-17149991 FORWARD	2173.08	354.682	0.163216	6.12684
Brapa_ESTC010454	AT1G21540	Symbols: | AMP-binding protein, putative | chr1:7548747-7550510 REVERSE	2680.73	437.99	0.163385	6.12053
Brapa_ESTC007289	AT5G22770	Symbols: ALPHA-ADR | ALPHA-ADR (ALPHA-ADAPTIN); binding / structural molecule | chr5:7579847-7588029 REVERSE	1134.12	187.429	0.165264	6.05093
Brapa_ESTC004254	AT1G02780	Symbols: EMB2386 | EMB2386 (EMBRYO DEFECTIVE 2386); structural constituent of ribosome | chr1:608120-609391 REVERSE	1696.95	281.137	0.165672	6.03603
Brapa_ESTC048325	AT5G11740	Symbols: ATAGP15, AGP15 | AGP15 (ARABINOGALACTAN PROTEIN 15) | chr5:3784319-3784504 FORWARD	1009.9	167.355	0.165714	6.03448
Brapa_ESTC021699	AT3G04610	Symbols: FLK | FLK (FLOWERING LOCUS KH DOMAIN); nucleic acid binding | chr3:1250768-1254278 REVERSE	1486.87	247.911	0.166733	5.9976
Brapa_ESTC030148	AT1G79090	Symbols: | similar to unknown protein [Arabidopsis thaliana] (TAIR:AT3G22270.1); similar to Os02g0517300 [Oryza sativa (japonica cultivar-group)] (GB:NP_001046960.1); similar to Os01g0769000 [Oryza sativa (japonica cultivar-group)] (GB:NP_001044369.1); similar to unknown protein [Oryza sativa (japonica cultivar-group)] (GB:BAD52714.1); contains domain gb def: YUP8H12R.29 protein (PTHR21551:SF11);…	2842.21	475.101	0.167159	5.98233
Brapa_ESTC023410	AT5G06860	Symbols: PGIP1 | PGIP1 (POLYGALACTURONASE INHIBITING PROTEIN 1); protein binding | chr5:2132374-2133435 FORWARD	2757.69	461.215	0.167247	5.97919
Brapa_ESTC008949	AT3G26730	Symbols: | zinc finger (C3HC4-type RING finger) family protein | chr3:9825007-9828507 FORWARD	2050.94	344.026	0.167741	5.96158
Brapa_ESTC017139	AT3G08970	Symbols: | DNAJ heat shock N-terminal domain-containing protein | chr3:2737594-2740270 FORWARD	1271.6	213.361	0.167789	5.95985
Brapa_ESTC045587	AT5G13700	Symbols: ATPAO1, APAO | APAO/ATPAO1 (POLYAMINE OXIDASE 1); FAD binding / polyamine oxidase | chr5:4420225-4422977 REVERSE	1307.73	220.624	0.168708	5.92741
Brapa_ESTC002243	AT2G41670	Symbols: | GTP-binding family protein | chr2:17381196-17383255 FORWARD	1318.45	222.701	0.168911	5.92027
Brapa_ESTC006133	AT1G71880	Symbols: ATSUC1, SUC1 | SUC1 (SUCROSE-PROTON SYMPORTER 1); carbohydrate transporter/ sucrose:hydrogen symporter/ sugar porter | chr1:27057996-27059762 FORWARD	1410.52	239.454	0.169763	5.89057
Brapa_ESTC007122	AT3G57540	Symbols: | remorin family protein | chr3:21312600-21313901 REVERSE	1058.36	179.726	0.169816	5.88874
Brapa_ESTC001956	AT3G55880	Symbols: | similar to unknown protein [Arabidopsis thaliana] (TAIR:AT2G40095.1); similar to Os03g0123800 [Oryza sativa (japonica cultivar-group)] (GB:NP_001048807.1); similar to unknown protein [Oryza sativa (japonica cultivar-group)] (GB:AAL58121.1); similar to Os01g0647700 [Oryza sativa (japonica cultivar-group)] (GB:NP_001043711.1); contains domain ALPHA/BETA HYDROLASE RELATED (PTHR10992:SF2);…	2481.95	425.141	0.171293	5.83795
Brapa_ESTC002665	AT5G41860	| Symbols: | unknown protein | chr5:16775179-16775757 FORWARD	1029.31	176.791	0.171757	5.82219
Brapa_ESTC024208	AT1G24530	Symbols: | transducin family protein / WD-40 repeat family protein | chr1:8693274-8694530 FORWARD	1140.03	195.869	0.17181	5.82037
Brapa_ESTC021739	AT4G39720	Symbols: | VQ motif-containing protein | chr4:18429986-18430858 REVERSE	2270.58	391.144	0.172266	5.80497
Brapa_ESTC017100	AT1G31730	Symbols: | epsilon-adaptin, putative | chr1:11359888-11363897 FORWARD	2208.84	381.572	0.172748	5.78879
Brapa_ESTC048259	no_hits_f	---------	1821.38	314.674	0.172767	5.78815
Brapa_ESTC035236	AT4G30350	Symbols: | heat shock protein-related | chr4:14848037-14850979 FORWARD	1843.9	320.554	0.173846	5.75223
Brapa_ESTC005345	AT3G13300	Symbols: VCS | VCS (VARICOSE); nucleotide binding | chr3:4304092-4309956 FORWARD	1236.32	215.977	0.174693	5.72431
Brapa_ESTC015386	AT5G62520	Symbols: SRO5 | SRO5 (SIMILAR TO RCD ONE 5); NAD+ ADP-ribosyltransferase | chr5:25115297-25116490 FORWARD	2176.67	380.728	0.174913	5.71713
Brapa_ESTC022485	AT4G30170	| Symbols: | peroxidase, putative | chr4:14762928-14764488 FORWARD	2540.14	444.933	0.175161	5.70904
Brapa_ESTC010687	AT3G56590	Symbols: | hydroxyproline-rich glycoprotein family protein | chr3:20976084-20978654 FORWARD	1701.92	299.62	0.176048	5.68026
Brapa_ESTC049745	AT5G27320	Symbols: ATGID1C, GID1C | ATGID1C/GID1C (GA INSENSITIVE DWARF1C) | chr5:9629257-9630749 FORWARD	1747.41	309.076	0.176877	5.65366
Brapa_ESTC019612	AT3G54690	Symbols: | sugar isomerase (SIS) domain-containing protein / CBS domain-containing protein | chr3:20257564-20258788 FORWARD	2254.14	398.922	0.176973	5.65058
Brapa_ESTC019140	AT3G55410	Symbols: | 2-oxoglutarate dehydrogenase E1 component, putative / oxoglutarate decarboxylase, putative / alpha-ketoglutaric dehydrogenase, putative | chr3:20552874-20556705 FORWARD	1015.13	180.711	0.178018	5.61742
Brapa_ESTC012520	AT4G04910	Symbols: NSF | NSF (N-ETHYLMALEIMIDE SENSITIVE FACTOR); ATP binding / nucleoside-triphosphatase/ nucleotide binding | chr4:2489694-2495664 REVERSE	1416.18	252.158	0.178055	5.61624
Brapa_ESTC020386	AT4G38040	Symbols: | exostosin family protein | chr4:17867495-17869125 FORWARD	1503.84	268.231	0.178364	5.60651
Brapa_ESTC013451	AT2G46260	Symbols: | BTB/POZ domain-containing protein | chr2:19003184-19005536 FORWARD	1038.65	185.693	0.178783	5.59337
Brapa_ESTC044460	AT4G24020	Symbols: | RWP-RK domain-containing protein | chr4:12479914-12483832 FORWARD	1531.76	274.184	0.178999	5.58661
Brapa_ESTC015913	AT3G11220	| Symbols: ELO1 | ELO1 (ELONGATA 1) | chr3:3513836-3515996 REVERSE	2468.53	442.436	0.179231	5.57941
Brapa_ESTC024407	AT5G14920	Symbols: | gibberellin-regulated family protein | chr5:4826601-4827764 FORWARD	1099.04	198.468	0.180583	5.53762
Brapa_ESTC016325	AT1G14790	Symbols: ATRDRP1, RDR1 | RDR1 (RNA-DEPENDENT RNA POLYMERASE 1); RNA-directed RNA polymerase/ nucleic acid binding | chr1:5094312-5097812 REVERSE	1340.95	242.416	0.180779	5.53161
Brapa_ESTC024760	AT1G60890	Symbols: | phosphatidylinositol-4-phosphate 5-kinase family protein | chr1:22416117-22420003 REVERSE	2687.42	486.25	0.180936	5.52683
Brapa_ESTC018543	AT1G72710	Symbols: | casein kinase, putative | chr1:27376215-27379840 FORWARD	2415.53	437.439	0.181094	5.52198
Brapa_ESTC019121	AT3G52430	Symbols: PAD4 | PAD4 (PHYTOALEXIN DEFICIENT 4); triacylglycerol lipase | chr3:19442544-19445270 FORWARD	1058.56	194.046	0.183311	5.4552
Brapa_ESTC018529	AT3G01670	Symbols: | similar to unknown protein [Arabidopsis thaliana] (TAIR:AT3G01680.1); similar to conserved hypothetical protein [Medicago truncatula] (GB:ABD32254.1) | chr3:247295-250268 FORWARD	1149.19	212.046	0.184518	5.41953
Brapa_ESTC010987	AT5G24470	Symbols: PRR5, APRR5 | APRR5 (PSEUDO-RESPONSE REGULATOR 5); transcription regulator | chr5:8356207-8358876 REVERSE	2362.09	438.953	0.185832	5.38119
Brapa_ESTC023721	AT4G18950	Symbols: | ankyrin protein kinase, putative | chr4:10375696-10378140 FORWARD	1861.22	346.251	0.186034	5.37535
Brapa_ESTC015891	AT1G76850	Symbols: SEC5A | SEC5A (EXOCYST COMPLEX COMPONENT SEC5) | chr1:28852907-28859176 FORWARD	1407.43	262.611	0.186589	5.35937
Brapa_ESTC028110	AT1G23040	Symbols: | hydroxyproline-rich glycoprotein family protein | chr1:8165014-8165448 FORWARD	1825.68	343.341	0.188062	5.3174
Brapa_ESTC011373	AT1G06460	Symbols: ACD31.2, ACD32.1 | ACD32.1 (ALPHA-CRYSTALLIN DOMAIN 31.2) | chr1:1967307-1969413 REVERSE	2248.44	425.415	0.189205	5.28529
Brapa_ESTC047683	AT3G14075	Symbols: | lipase class 3 family protein | chr3:4663826-4666345 REVERSE	2056.81	390.869	0.190037	5.26215
Brapa_ESTC012705	AT4G16850	Symbols: | similar to unknown protein [Arabidopsis thaliana] (TAIR:AT1G31130.1); similar to IMP dehydrogenase/GMP reductase [Medicago truncatula] (GB:ABE86436.1); contains domain gb def: Hypothetical protein (PTHR22597:SF11); contains domain FAMILY NOT NAMED (PTHR22597) | chr4:9480718-9481659 FORWARD	1598.33	303.788	0.190066	5.26133
Brapa_ESTC023054	AT3G52660	| Symbols: | RNA binding | chr3:19533576-19535713 FORWARD	2376.77	452.306	0.190303	5.25478
Brapa_ESTC031269	AT4G39680	Symbols: | SAP domain-containing protein | chr4:18414598-18416932 REVERSE	1139.05	217.945	0.191339	5.22632
Brapa_ESTC031893	AT1G02900	Symbols: RALFL1 | RALFL1 (RALF-LIKE 1) | chr1:653976-654338 REVERSE	2225.85	427.008	0.19184	5.21267
Brapa_ESTC002217	AT2G30110	Symbols: MOS5, ATUBA1 | ATUBA1 (Arabidopsis thaliana ubiquitin-activating enzyme 1); ubiquitin activating enzyme | chr2:12859709-12864446 REVERSE	1545.88	297.031	0.192144	5.20444
Brapa_ESTC040891	no_hits_f	---------	1588.57	305.927	0.19258	5.19264
Brapa_ESTC017673	AT2G44970	| Symbols: | lipase-related | chr2:18556074-18559094 REVERSE	1496.47	288.772	0.192969	5.18219
Brapa_ESTC027121	AT2G47730	Symbols: GST6, ATGSTF5, GSTF8, ATGSTF8 | ATGSTF8 (GLUTATHIONE S-TRANSFERASE 8); glutathione transferase | chr2:19565283-19566336 FORWARD	1636.86	316.233	0.193195	5.17612
Brapa_ESTC013978	AT1G09560	Symbols: GLP5 | GLP5 (GERMIN-LIKE PROTEIN 5); manganese ion binding / metal ion binding / nutrient reservoir | chr1:3093898-3094641 FORWARD	2221.77	429.298	0.193223	5.17536
Brapa_ESTC012111	AT2G39950	Symbols: | similar to Os07g0100500 [Oryza sativa (japonica cultivar-group)] (GB:NP_001058671.1) | chr2:16683836-16687282 REVERSE	2004.43	387.32	0.193232	5.17513
Brapa_ESTC047355	no_hits_f	---------	2359.31	456.078	0.19331	5.17304
Brapa_ESTC026643	AT4G12250	Symbols: GAE5 | GAE5 (UDP-D-GLUCURONATE 4-EPIMERASE 5); catalytic | chr4:7289532-7290842 REVERSE	2060.01	398.543	0.193467	5.16885
Brapa_ESTC003367	AT5G07440	Symbols: GDH2 | GDH2 (GLUTAMATE DEHYDROGENASE 2); oxidoreductase | chr5:2356154-2358013 FORWARD	1314.42	255.101	0.194079	5.15255
Brapa_ESTC026673	AT1G09530	Symbols: PIF3, POC1, PAP3 | PIF3 (PHYTOCHROME INTERACTING FACTOR 3); DNA binding / transcription factor/ transcription regulator | chr1:3077218-3079369 FORWARD	1031.49	202.317	0.196141	5.09839
Brapa_ESTC041647	AT2G33730	Symbols: | DEAD box RNA helicase, putative | chr2:14272755-14274956 REVERSE	1920.71	377.916	0.196758	5.08237
Brapa_ESTC033717	AT5G43780	| Symbols: APS4 | APS4 | chr5:17606858-17608707 REVERSE	1436.64	285.108	0.198455	5.03893
Brapa_ESTC051637	AT5G60300	Symbols: | lectin protein kinase family protein | chr5:24282088-24285199 FORWARD	1597.63	317.242	0.19857	5.036
Brapa_ESTC016906	AT3G26200	Symbols: CYP71B22 | CYP71B22 (cytochrome P450, family 71, subfamily B, polypeptide 22); oxygen binding | chr3:9590584-9592209 FORWARD	1399.63	281.249	0.200945	4.97648
Brapa_ESTC050264	no_hits_f	---------	1890.82	380.214	0.201084	4.97304
Brapa_ESTC023047	AT4G32760	| Symbols: | protein transporter | chr4:15799381-15803837 FORWARD	1935.53	391.513	0.202277	4.94372
Brapa_ESTC002106	AT5G13490	Symbols: AAC2 | AAC2 (ADP/ATP CARRIER 2); binding | chr5:4336037-4337382 FORWARD	1392.28	282.326	0.20278	4.93146
Brapa_ESTC003772	AT3G22310	Symbols: | DEAD box RNA helicase, putative (RH9) | chr3:7887389-7889813 FORWARD	1480.09	302.389	0.204304	4.89466
Brapa_ESTC051447	no_hits_f	---------	1053.53	215.382	0.204438	4.89145
Brapa_ESTC039661	AT1G16930	| Symbols: | F-box family protein | chr1:5789980-5791527 FORWARD	1336.42	273.343	0.204534	4.88917
Brapa_ESTC014613	no_hits_f	---------	1722.97	352.928	0.204837	4.88193
Brapa_ESTC016795	AT5G37510	Symbols: EMB1467 | EMB1467 (EMBRYO DEFECTIVE 1467); NADH dehydrogenase | chr5:14914720-14917677 FORWARD	1934.51	396.505	0.204964	4.8789
Brapa_ESTC015231	AT1G01510	| Symbols: AN | AN (ANGUSTIFOLIA) | chr1:187235-189836 FORWARD	2057.32	422.259	0.205247	4.87218
Brapa_ESTC007818	AT1G73180	Symbols: | eukaryotic translation initiation factor-related | chr1:27521996-27525093 FORWARD	1532.8	314.819	0.205388	4.86883
Brapa_ESTC018831	AT4G39120	Symbols: | inositol monophosphatase family protein | chr4:18225572-18227895 REVERSE	1504.86	309.195	0.205464	4.86703
Brapa_ESTC051771	no_hits_f	---------	1552.86	322.101	0.207424	4.82103
Brapa_ESTC021519	AT4G11740	| Symbols: SAY1 | SAY1 | chr4:7071949-7075250 FORWARD	2347.42	486.99	0.207458	4.82026
Brapa_ESTC021360	AT1G08680	Symbols: AGD14, ZIGA4 | ZIGA4 (ARF GAP-LIKE ZINC FINGER-CONTAINING PROTEIN ZIGA4); DNA binding | chr1:2762823-2768390 FORWARD	1085.02	226.041	0.208329	4.8001
Brapa_ESTC003227	AT3G47550	Symbols: | zinc finger (C3HC4-type RING finger) family protein | chr3:17534826-17536263 FORWARD	1709.24	357.115	0.208932	4.78625
Brapa_ESTC043894	AT3G59480	Symbols: | pfkB-type carbohydrate kinase family protein | chr3:21994080-21995417 FORWARD	2068.93	433.157	0.209363	4.7764
Brapa_ESTC011593	AT5G13700	Symbols: ATPAO1, APAO | APAO/ATPAO1 (POLYAMINE OXIDASE 1); FAD binding / polyamine oxidase | chr5:4420225-4422977 REVERSE	1359.94	285.197	0.209713	4.76842
Brapa_ESTC007700	AT4G30210	Symbols: AR2, ATR2 | ATR2 (ARABIDOPSIS P450 REDUCTASE 2) | chr4:14796906-14800584 FORWARD	2000.2	420.678	0.210318	4.75471
Brapa_ESTC034711	AT5G07880	Symbols: ATSNAP29, SNAP29 | SNAP29 (Synaptosomal-associated protein SNAP25-like 29) | chr5:2515588-2516695 REVERSE	2184.08	460.39	0.210794	4.74398
Brapa_ESTC034114	AT1G69900	Symbols: | similar to unknown protein [Arabidopsis thaliana] (TAIR:AT1G27100.1); similar to Cytosolic fatty-acid binding; Actin-crosslinking proteins [Medicago truncatula] (GB:ABE82702.1); contains InterPro domain Protein of unknown function DUF569; (InterPro:IPR007679); contains InterPro domain Actin-crosslinking proteins; (InterPro:IPR008999) | chr1:26330183-26331479 REVERSE	2027.49	427.436	0.21082	4.74338
Brapa_ESTC001558	AT4G16760	Symbols: ATACX1, ACX1 | ACX1 (ACYL-COA OXIDASE 1) | chr4:9424918-9428710 REVERSE	1158.6	244.992	0.211455	4.72913
Brapa_ESTC009998	AT2G26870	Symbols: | phosphoesterase family protein | chr2:11464195-11466433 REVERSE	2034.34	430.68	0.211705	4.72355
Brapa_ESTC013635	AT4G04810	Symbols: | methionine sulfoxide reductase domain-containing protein / SeIR domain-containing protein | chr4:2441410-2442565 FORWARD	1489.55	317.686	0.213276	4.68875
Brapa_ESTC025358	AT5G03720	Symbols: HSFA3, AT-HSFA3 | AT-HSFA3 (Arabidopsis thaliana heat shock transcription factor A3); DNA binding / transcription factor | chr5:971912-973682 REVERSE	1063.42	227.51	0.213942	4.67417
Brapa_ESTC025972	AT4G35790	Symbols: PLDDELTA, ATPLDDELTA | ATPLDDELTA (Arabidopsis thaliana phospholipase D delta); phospholipase D | chr4:16955778-16959879 REVERSE	1602.46	343.276	0.214218	4.66814
Brapa_ESTC022522	AT5G48290	Symbols: | heavy-metal-associated domain-containing protein | chr5:19586206-19586884 FORWARD	1506.7	324.356	0.215276	4.6452
Brapa_ESTC041047	AT2G21630	Symbols: | transport protein, putative | chr2:9257426-9260909 FORWARD	1570.76	338.533	0.215522	4.6399
Brapa_ESTC011102	AT2G20310	Symbols: | similar to unknown protein [Arabidopsis thaliana] (TAIR:AT4G28690.1); similar to Os10g0466000 [Oryza sativa (japonica cultivar-group)] (GB:NP_001064801.1); similar to unknown protein [Oryza sativa (japonica cultivar-group)] (GB:AAK27810.1) | chr2:8768409-8770164 REVERSE	1859.32	402.599	0.21653	4.61829
Brapa_ESTC011905	AT2G37250	Symbols: ADK, ATPADK1 | ADK/ATPADK1 (ADENOSINE KINASE); nucleotide kinase | chr2:15649070-15650397 FORWARD	1230.88	266.706	0.216679	4.61512
Brapa_ESTC020666	AT3G01310	| Symbols: | acid phosphatase | chr3:94350-101610 REVERSE	1158.41	251.32	0.216953	4.6093
Brapa_ESTC016023	AT3G08930	Symbols: | similar to LMBR1 integral membrane family protein [Arabidopsis thaliana] (TAIR:AT5G01460.1); similar to LMBR1 integral membrane family protein-like [Oryza sativa (japonica cultivar-group)] (GB:BAD44783.1); similar to Os06g0128200 [Oryza sativa (japonica cultivar-group)] (GB:NP_001056670.1); contains InterPro domain LMBR1-like conserved region; (InterPro:IPR006876) | chr3:2713568-271706…	2114.54	459.019	0.217077	4.60665
Brapa_ESTC016044	AT3G07100	Symbols: | protein transport protein Sec24, putative | chr3:2245695-2250083 REVERSE	1740.02	379.014	0.217822	4.59091
Brapa_ESTC039272	AT1G02380	Symbols: | similar to unknown protein [Arabidopsis thaliana] (TAIR:AT4G01960.1); similar to hypothetical protein MtrDRAFT_AC153352g19v1 [Medicago truncatula] (GB:ABE87668.1) | chr1:477814-478443 FORWARD	1752.48	382.454	0.218236	4.5822
Brapa_ESTC011977	AT1G64140	Symbols: | similar to loricrin-related [Arabidopsis thaliana] (TAIR:AT5G64550.1); similar to Os01g0621900 [Oryza sativa (japonica cultivar-group)] (GB:NP_001043607.1); similar to loricrin-like [Oryza sativa (japonica cultivar-group)] (GB:BAD20066.1) | chr1:23807732-23809672 REVERSE	1802.5	393.788	0.218468	4.57734
Brapa_ESTC010416	AT2G39990	Symbols: EIF2 | EIF2 (eukaryotic translation initiation factor 2); translation initiation factor | chr2:16705410-16707007 REVERSE	1022.28	223.672	0.218797	4.57044
Brapa_ESTC011731	AT1G54050	Symbols: | 17.4 kDa class III heat shock protein (HSP17.4-CIII) | chr1:20183226-20183790 REVERSE	1717.09	375.81	0.218864	4.56904
Brapa_ESTC019291	AT1G71000	Symbols: | DNAJ heat shock N-terminal domain-containing protein | chr1:26772998-26773773 REVERSE	1131.32	248.034	0.219243	4.56115
Brapa_ESTC029119	AT5G49520	Symbols: ATWRKY48, WRKY48 | WRKY48 (WRKY DNA-binding protein 48); transcription factor | chr5:20108116-20110093 FORWARD	1157.31	253.893	0.219382	4.55826
Brapa_ESTC009720	AT5G54800	Symbols: GPT1 | GPT1 (glucose-6-phosphate transporter 1); antiporter/ glucose-6-phosphate transporter | chr5:22278634-22280788 FORWARD	1858.81	409.435	0.220267	4.53994
Brapa_ESTC033428	AT3G09540	Symbols: | pectate lyase family protein | chr3:2929085-2931143 REVERSE	2035.91	448.754	0.220419	4.53681
Brapa_ESTC022979	AT1G17410	Symbols: | nucleoside diphosphate kinase family protein | chr1:5968620-5969773 REVERSE	1404.94	310.526	0.221024	4.52439
Brapa_ESTC004868	AT1G13250	Symbols: GATL3 | GATL3 (Galacturonosyltransferase-like 3); polygalacturonate 4-alpha-galacturonosyltransferase/ transferase, transferring glycosyl groups / transferase, transferring hexosyl groups | chr1:4528962-4529999 REVERSE	1856.74	410.945	0.221326	4.51822
Brapa_ESTC043227	AT3G22300	Symbols: RPS10 | RPS10 (RIBOSOMAL PROTEIN S10); structural constituent of ribosome | chr3:7885744-7886620 FORWARD	1080.79	239.808	0.221882	4.5069
Brapa_ESTC015831	AT5G16220	Symbols: | octicosapeptide/Phox/Bem1p (PB1) domain-containing protein | chr5:5298607-5300582 REVERSE	1663.45	371.12	0.223103	4.48224
Brapa_ESTC012010	AT5G02910	| Symbols: | F-box family protein | chr5:677118-678905 FORWARD	1904.92	429.766	0.225608	4.43246
Brapa_ESTC018416	AT3G59080	| Symbols: | DNA binding | chr3:21847789-21849396 FORWARD	1084.28	245.237	0.226175	4.42136
Brapa_ESTC031162	AT3G15500	Symbols: ANAC055, ATNAC3 | ATNAC3 (ARABIDOPSIS NAC DOMAIN CONTAINING PROTEIN 55); transcription factor | chr3:5234738-5235889 FORWARD	1322.67	299.247	0.226245	4.41999
Brapa_ESTC015801	AT4G11380	| Symbols: | beta-adaptin, putative | chr4:6920603-6925439 FORWARD	1414.42	320.399	0.226523	4.41456
Brapa_ESTC047108	no_hits_f	---------	1451.2	328.975	0.226692	4.41128
Brapa_ESTC002260	AT4G05020	Symbols: NDB2 | NDB2 (NAD(P)H DEHYDROGENASE B2); disulfide oxidoreductase | chr4:2572750-2576220 FORWARD	1214.75	275.643	0.226913	4.40697
Brapa_ESTC019782	AT2G28840	Symbols: | ankyrin repeat family protein | chr2:12385619-12387551 FORWARD	1963.22	445.788	0.22707	4.40393
Brapa_ESTC007918	AT5G63160	Symbols: BT1 | BT1 (BTB and TAZ domain protein 1); protein binding / transcription regulator | chr5:25350711-25352625 REVERSE	2118.17	481.014	0.227089	4.40355
Brapa_ESTC026578	AT2G12550	Symbols: | ubiquitin-associated (UBA)/TS-N domain-containing protein | chr2:5121963-5125568 FORWARD	1823.73	415.84	0.228016	4.38565
Brapa_ESTC001174	AT3G15530	Symbols: | similar to unknown protein [Arabidopsis thaliana] (TAIR:AT5G54400.1); similar to conserved hypothetical protein [Chloroflexus aurantiacus J-10-fl] (GB:ZP_00766604.1); contains InterPro domain SAM (and some other nucleotide) binding motif; (InterPro:IPR000051); contains InterPro domain Methyltransferase type 11; (InterPro:IPR013216); contains InterPro domain Generic methyltransferase; (…	1194.72	272.504	0.22809	4.38423
Brapa_ESTC017127	AT5G41990	Symbols: ATWNK8, WNK8 | WNK8 (Arabidopsis WNK kinase 8); kinase | chr5:16812313-16814790 REVERSE	1560.53	355.968	0.228107	4.38391
Brapa_ESTC022671	AT1G10090	Symbols: | similar to RXW8 [Arabidopsis thaliana] (TAIR:AT1G58520.1); similar to Os12g0633600 [Oryza sativa (japonica cultivar-group)] (GB:NP_001067352.1); similar to Protein of unknown function DUF221 [Medicago truncatula] (GB:ABE86757.1); similar to Os03g0673800 [Oryza sativa (japonica cultivar-group)] (GB:NP_001050880.1); contains InterPro domain Protein of unknown function DUF221; (InterPro:I…	1828.95	417.62	0.228339	4.37946
Brapa_ESTC014366	AT2G38290	Symbols: ATAMT2 | ATAMT2 (AMMONIUM TRANSPORTER 2); ammonium transporter | chr2:16046750-16049369 REVERSE	1893.86	433.044	0.228657	4.37337
Brapa_ESTC045678	AT5G16220	Symbols: | octicosapeptide/Phox/Bem1p (PB1) domain-containing protein | chr5:5298607-5300582 REVERSE	1363.59	313.232	0.229711	4.35329
Brapa_ESTC011201	AT1G62810	Symbols: | copper amine oxidase, putative | chr1:23261918-23265437 REVERSE	1874.44	430.681	0.229765	4.35227
Brapa_ESTC007625	AT1G15430	Symbols: | similar to unknown protein [Arabidopsis thaliana] (TAIR:AT1G80220.1); similar to Os01g0612600 [Oryza sativa (japonica cultivar-group)] (GB:NP_001043557.1); similar to Pm27 [Prunus mume] (GB:BAE48661.1); contains InterPro domain Protein of unknown function DUF1644; (InterPro:IPR012866) | chr1:5305006-5305785 FORWARD	1265.15	290.975	0.229992	4.34797
Brapa_ESTC006710	AT3G13340	Symbols: | WD-40 repeat family protein | chr3:4332377-4334610 FORWARD	1891.77	435.497	0.230206	4.34393
Brapa_ESTC001977	AT4G08950	Symbols: | phosphate-responsive protein, putative (EXO) | chr4:5740375-5741319 FORWARD	1488.52	342.915	0.230373	4.34078
Brapa_ESTC008111	AT3G14050	Symbols: AT-RSH2, RSH2 | RSH2 (RELA-SPOT HOMOLOG); catalytic | chr3:4650909-4653521 REVERSE	1511.67	349.453	0.23117	4.32582
Brapa_ESTC024464	AT2G34930	Symbols: | disease resistance family protein | chr2:14744248-14746965 REVERSE	1898.93	439.259	0.231319	4.32303
Brapa_ESTC015429	AT3G62310	Symbols: | RNA helicase, putative | chr3:23068491-23071536 REVERSE	1264.66	292.923	0.231622	4.31738
Brapa_ESTC025620	AT2G43070	Symbols: | protease-associated (PA) domain-containing protein | chr2:17918310-17921853 REVERSE	1328.05	309.337	0.232926	4.29321
Brapa_ESTC017910	AT3G49920	| Symbols: | porin, putative | chr3:18516821-18518684 REVERSE	1179.06	275.931	0.234026	4.27302
Brapa_ESTC025187	AT1G51420	Symbols: | sucrose-phosphatase, putative | chr1:19068520-19070372 REVERSE	1291.92	302.353	0.234034	4.27289
Brapa_ESTC006898	AT1G49450	Symbols: | transducin family protein / WD-40 repeat family protein | chr1:18309352-18310767 FORWARD	1364	320.275	0.234806	4.25884
Brapa_ESTC004663	AT1G55310	Symbols: ATSCL33, SCL33, SR33 | SR33 (SC35-like splicing factor 33); RNA binding | chr1:20634343-20636240 FORWARD	1611.26	378.545	0.234937	4.25646
Brapa_ESTC047558	AT5G61960	Symbols: AML1 | AML1 (ARABIDOPSIS MEI2-LIKE PROTEIN 1); RNA binding | chr5:24896227-24900709 REVERSE	1254.52	295.177	0.235291	4.25006
Brapa_ESTC025194	AT4G08040	Symbols: ACS11 | ACS11 (1-Amino-cyclopropane-1-carboxylate synthase 11); 1-aminocyclopropane-1-carboxylate synthase | chr4:4887109-4888936 FORWARD	2086.11	491.811	0.235755	4.24169
Brapa_ESTC015240	AT2G37040	Symbols: PAL1 | PAL1 (PHE AMMONIA LYASE 1); phenylalanine ammonia-lyase | chr2:15564681-15567316 REVERSE	1273.71	301.43	0.236655	4.22556
Brapa_ESTC024879	AT4G36680	Symbols: | pentatricopeptide (PPR) repeat-containing protein | chr4:17292483-17293721 REVERSE	1229.88	291.067	0.236663	4.22542
Brapa_ESTC002798	AT3G24480	Symbols: | leucine-rich repeat family protein / extensin family protein | chr3:8901161-8902645 REVERSE	1411.51	335.151	0.237441	4.21156
Brapa_ESTC022668	AT4G15420	Symbols: | PRLI-interacting factor K | chr4:8823822-8825949 FORWARD	1869.74	444.31	0.237632	4.20819
Brapa_ESTC048263	no_hits_f	---------	1899.14	452.193	0.238104	4.19984
Brapa_ESTC038955	AT5G58960	Symbols: GIL1 | GIL1 (GRAVITROPIC IN THE LIGHT) | chr5:23824132-23825586 FORWARD	1968.83	469.011	0.238218	4.19783
Brapa_ESTC011372	AT1G04830	Symbols: | RabGAP/TBC domain-containing protein | chr1:1359086-1361843 REVERSE	1559.83	373.173	0.23924	4.17991
Brapa_ESTC024782	no_hits_f	---------	1906.03	456.313	0.239405	4.17702
Brapa_ESTC004389	AT1G25280	Symbols: AtTLP10 | AtTLP10 (TUBBY LIKE PROTEIN 10); phosphoric diester hydrolase/ transcription factor | chr1:8864948-8866595 FORWARD	1521.21	364.723	0.239758	4.17086
Brapa_ESTC028383	no_hits_f	---------	1496.1	358.954	0.239926	4.16794
Brapa_ESTC017126	AT5G54200	Symbols: | WD-40 repeat family protein | chr5:22010791-22014302 REVERSE	1733.76	416.306	0.240117	4.16463
Brapa_ESTC015945	AT5G59730	Symbols: ATEXO70H7 | ATEXO70H7 (EXOCYST SUBUNIT EXO70 FAMILY PROTEIN H7); protein binding | chr5:24081322-24083230 REVERSE	1709.36	411.866	0.240947	4.15028
Brapa_ESTC022530	AT1G41830	Symbols: SKS6 | SKS6 (SKU5 Similar 6); pectinesterase | chr1:15606333-15610243 REVERSE	1911.59	461.933	0.241649	4.13824
Brapa_ESTC005078	AT2G37480	Symbols: | similar to unknown protein [Arabidopsis thaliana] (TAIR:AT3G53670.1); similar to hypothetical protein MtrDRAFT_AC125368g26v1 [Medicago truncatula] (GB:ABE93949.1); similar to hypothetical protein MtrDRAFT_AC135797g8v1 [Medicago truncatula] (GB:ABE82095.1); contains InterPro domain Galactose-binding like; (InterPro:IPR008979) | chr2:15745723-15746657 FORWARD	1092.46	264.508	0.242121	4.13016
Brapa_ESTC024686	AT3G51120	Symbols: | zinc finger (CCCH-type) family protein | chr3:18997006-19002680 REVERSE	1188.69	288.338	0.242568	4.12256
Brapa_ESTC025096	AT3G15500	Symbols: ANAC055, ATNAC3 | ATNAC3 (ARABIDOPSIS NAC DOMAIN CONTAINING PROTEIN 55); transcription factor | chr3:5234738-5235889 FORWARD	1584.01	384.34	0.242637	4.12138
Brapa_ESTC028317	AT3G11450	Symbols: | DNAJ heat shock N-terminal domain-containing protein / cell division protein-related | chr3:3605465-3607483 REVERSE	1883.59	457.076	0.242662	4.12096
Brapa_ESTC022962	AT5G28490	Symbols: LSH1 | LSH1 (LIGHT-DEPENDENT SHORT HYPOCOTYLS 1) | chr5:10454545-10455117 REVERSE	1923.42	467.157	0.242878	4.11729
Brapa_ESTC051448	no_hits_f	---------	1347.2	327.882	0.24338	4.1088
Brapa_ESTC032868	AT2G33730	Symbols: | DEAD box RNA helicase, putative | chr2:14272755-14274956 REVERSE	1510.02	367.549	0.243407	4.10835
Brapa_ESTC031709	AT5G57015	Symbols: CKL12 | CKL12 (Casein Kinase I-like 12); casein kinase I/ kinase | chr5:23088734-23091803 FORWARD	1152.66	280.661	0.24349	4.10695
Brapa_ESTC009908	AT1G31780	Symbols: | similar to Hypothetical protein [Oryza sativa (japonica cultivar-group)] (GB:AAN52749.1); contains InterPro domain Conserved oligomeric complex COG6; (InterPro:IPR010490) | chr1:11391322-11394591 FORWARD	1605.17	391.784	0.244076	4.09708
Brapa_ESTC026453	AT5G59030	Symbols: COPT1 | COPT1 (COPPER TRANSPORTER 1); copper ion transporter | chr5:23851171-23851683 REVERSE	1837.35	448.869	0.244302	4.09329
Brapa_ESTC015425	AT3G55430	Symbols: | glycosyl hydrolase family 17 protein / beta-1,3-glucanase, putative | chr3:20560783-20562981 REVERSE	1110.55	271.346	0.244335	4.09275
Brapa_ESTC005361	AT1G80630	Symbols: | leucine-rich repeat family protein | chr1:30313771-30315507 REVERSE	1009.4	247.304	0.245001	4.08162
Brapa_ESTC039959	no_hits_f	---------	1429.79	350.643	0.245241	4.07762
Brapa_ESTC021919	AT4G24560	Symbols: UBP16 | UBP16 (UBIQUITIN-SPECIFIC PROTEASE 16); ubiquitin-specific protease | chr4:12679503-12684538 REVERSE	1748.11	428.843	0.245318	4.07634
Brapa_ESTC010589	AT3G02740	Symbols: | aspartyl protease family protein | chr3:590568-593096 FORWARD	1767.09	433.937	0.245566	4.07223
Brapa_ESTC006935	AT5G65700	Symbols: BAM1 | BAM1 (big apical meristem 1); ATP binding / kinase/ protein serine/threonine kinase | chr5:26299052-26302171 FORWARD	1964.38	483.213	0.245988	4.06525
Brapa_ESTC022639	AT2G25760	Symbols: | protein kinase family protein | chr2:10992196-10995730 REVERSE	1558.16	383.767	0.246295	4.06017
Brapa_ESTC029063	AT3G27260	Symbols: GTE8 | GTE8 (GLOBAL TRANSCRIPTION FACTOR GROUP E8); DNA binding | chr3:10069648-10073640 FORWARD	1259.6	311.051	0.246944	4.0495
Brapa_ESTC017845	AT1G58220	Symbols: | myb family transcription factor | chr1:21562053-21566334 REVERSE	1969.89	486.957	0.2472	4.04531
Brapa_ESTC017206	AT1G04510	| Symbols: | nucleotide binding | chr1:1226748-1230591 FORWARD	1761.81	435.99	0.247467	4.04094
Brapa_ESTC008989	AT5G13030	Symbols: | similar to Os06g0320700 [Oryza sativa (japonica cultivar-group)] (GB:NP_001057514.1); similar to hypothetical protein ebA6654 [Azoarcus sp. EbN1] (GB:YP_160826.1); contains InterPro domain Protein of unknown function UPF0061; (InterPro:IPR003846) | chr5:4133219-4136464 FORWARD	1034.65	257.084	0.248474	4.02456
Brapa_ESTC024203	AT1G17290	Symbols: ALAAT1 | ALAAT1 (ALANINE AMINOTRANSFERAS); alanine transaminase | chr1:5922764-5926086 FORWARD	1551.93	386.841	0.249264	4.0118
Brapa_ESTC049108	no_hits_f	---------	1743.58	436.143	0.250142	3.99773
Brapa_ESTC042840	AT3G12977	| Symbols: | DNA binding | chr3:4143839-4145867 FORWARD	1223.47	306.158	0.250237	3.9962
Brapa_ESTC050429	AT3G49590	Symbols: | similar to unknown protein [Arabidopsis thaliana] (TAIR:AT3G18770.1); similar to IMP dehydrogenase/GMP reductase [Medicago truncatula] (GB:ABE83766.1) | chr3:18388877-18391089 FORWARD	1844.26	462.479	0.250767	3.98777
Brapa_ESTC019899	AT5G47490	Symbols: | similar to unknown protein [Arabidopsis thaliana] (TAIR:AT5G47480.1); similar to hypothetical protein 24.t00016 [Brassica oleracea] (GB:ABD64938.1); similar to hypothetical protein 24.t00015 [Brassica oleracea] (GB:ABD64937.1); similar to hypothetical protein 25.t00024 [Brassica oleracea] (GB:ABD64978.1); contains domain RGPR-RELATED (PTHR13402); contains domain SIMILARITY TO UNKNOWN P…	1296.96	325.912	0.251289	3.97948
Brapa_ESTC037290	AT2G03290	Symbols: | emp24/gp25L/p24 family protein | chr2:999548-1000431 FORWARD	1733.4	437.384	0.252327	3.96311
Brapa_ESTC000039	AT5G56350	Symbols: | pyruvate kinase, putative | chr5:22837480-22839755 REVERSE	1129.39	285.03	0.252375	3.96235
Brapa_ESTC004789	AT1G19025	Symbols: | DNA cross-link repair protein-related | chr1:6568911-6570791 FORWARD	1150.18	290.637	0.252688	3.95745
Brapa_ESTC015802	AT5G11980	Symbols: | conserved oligomeric Golgi complex component-related / COG complex component-related | chr5:3868810-3872147 REVERSE	1274.42	322.12	0.252758	3.95635
Brapa_ESTC012764	AT2G32600	Symbols: | hydroxyproline-rich glycoprotein family protein | chr2:13840856-13842602 REVERSE	1452.6	368.276	0.253529	3.94432
Brapa_ESTC036807	AT4G35890	Symbols: | La domain-containing protein | chr4:16997436-17000413 FORWARD	1775.54	450.158	0.253533	3.94426
Brapa_ESTC022254	AT4G12310	Symbols: CYP706A5 | CYP706A5 (cytochrome P450, family 706, subfamily A, polypeptide 5); oxygen binding | chr4:7310593-7312517 REVERSE	1007.6	256.424	0.25449	3.92943
Brapa_ESTC038331	no_hits_f	---------	1451.62	369.916	0.25483	3.92419
Brapa_ESTC006042	AT3G01310	| Symbols: | acid phosphatase | chr3:94350-101610 REVERSE	1481.04	378.397	0.255494	3.91398
Brapa_ESTC047519	AT1G63770	Symbols: | peptidase M1 family protein | chr1:23661913-23667906 REVERSE	1115.14	285.1	0.255663	3.9114
Brapa_ESTC007423	AT3G22270	Symbols: | similar to unknown protein [Arabidopsis thaliana] (TAIR:AT4G14990.1); similar to Os02g0517300 [Oryza sativa (japonica cultivar-group)] (GB:NP_001046960.1); similar to unknown protein [Oryza sativa (japonica cultivar-group)] (GB:BAD52714.1); contains domain gb def: Arabidopsis thaliana genomic DNA, chromosome 3, P1 clone: MMP21 (PTHR21551:SF12); contains domain FAMILY NOT NAMED (PTHR215…	1424.74	364.362	0.255739	3.91023
Brapa_ESTC011877	AT1G33590	Symbols: | disease resistance protein-related / LRR protein-related | chr1:12177768-12179201 FORWARD	1165.69	298.767	0.256301	3.90167
Brapa_ESTC051772	no_hits_f	---------	1304.32	334.823	0.256703	3.89555
Brapa_ESTC007054	AT3G15510	Symbols: ANAC056, ATNAC2 | ATNAC2 (Arabidopsis thaliana NAC domain containing protein 2); transcription factor | chr3:5243703-5245044 FORWARD	1272.81	326.751	0.256716	3.89535
Brapa_ESTC046335	AT5G56180	Symbols: ATARP8 | ATARP8 (ACTIN-RELATED PROTEIN 8); structural constituent of cytoskeleton | chr5:22754765-22758212 REVERSE	1621.91	418.308	0.257911	3.87731
Brapa_ESTC018375	AT2G27950	Symbols: | similar to protein binding / zinc ion binding [Arabidopsis thaliana] (TAIR:AT5G04460.1); similar to Os09g0570500 [Oryza sativa (japonica cultivar-group)] (GB:NP_001063987.1); similar to cell wall-anchored protein [Staphylococcus saprophyticus subsp. saprophyticus ATCC 15305] (GB:YP_300225.1); similar to Os02g0823300 [Oryza sativa (japonica cultivar-group)] (GB:NP_001048568.1); contains…	1290.34	335.361	0.259901	3.84761
Brapa_ESTC005181	AT4G21920	Symbols: | similar to unknown protein [Arabidopsis thaliana] (TAIR:AT3G20340.1) | chr4:11636096-11636485 REVERSE	1859.91	483.449	0.259931	3.84717
Brapa_ESTC007313	AT1G48970	Symbols: | GTP binding / translation initiation factor | chr1:18117536-18121215 REVERSE	1345.13	349.658	0.259944	3.84699
Brapa_ESTC019497	AT1G14650	Symbols: | SWAP (Suppressor-of-White-APricot)/surp domain-containing protein / ubiquitin family protein | chr1:5028072-5030515 FORWARD	1540.3	400.567	0.260058	3.8453
Brapa_ESTC017292	AT3G60240	Symbols: CUM2, EIF4G | EIF4G (EUKARYOTIC TRANSLATION INITIATION FACTOR 4G) | chr3:22272817-22279270 FORWARD	1727.23	450.254	0.26068	3.83612
Brapa_ESTC051183	no_hits_f	---------	1829.79	481.698	0.263253	3.79862
Brapa_ESTC025035	AT1G21450	Symbols: SCL1 | SCL1 (SCARECROW-LIKE 1); transcription factor | chr1:7509710-7511491 FORWARD	1882.13	496.616	0.263859	3.78991
Brapa_ESTC023975	AT3G11910	Symbols: | ubiquitin-specific protease, putative | chr3:3761764-3770296 REVERSE	1050.92	278.53	0.265034	3.77309
Brapa_ESTC005248	AT5G20200	| Symbols: | nucleoporin-related | chr5:6816778-6821622 FORWARD	1058.2	280.527	0.265098	3.77219
Brapa_ESTC002558	AT4G13270	Symbols: | similar to unknown protein [Arabidopsis thaliana] (TAIR:AT1G52330.1); similar to Os03g0696000 [Oryza sativa (japonica cultivar-group)] (GB:NP_001050978.1); similar to hypothetical protein [Oryza sativa (japonica cultivar-group)] (GB:AAO19373.1) | chr4:7731276-7732898 FORWARD	1018.13	270.052	0.265243	3.77013
Brapa_ESTC020312	AT2G26570	Symbols: | similar to unknown protein [Arabidopsis thaliana] (TAIR:AT5G42880.1); similar to unknown protein [Arabidopsis thaliana] (TAIR:AT4G33390.1); similar to IMP dehydrogenase/GMP reductase [Medicago truncatula] (GB:ABE88908.1); contains InterPro domain Protein of unknown function DUF827, plant; (InterPro:IPR008545) | chr2:11306643-11309154 FORWARD	1278.99	339.836	0.265707	3.76355
Brapa_ESTC019047	AT5G39900	Symbols: | GTP binding / translation elongation factor | chr5:15993947-15996153 REVERSE	1032.16	274.426	0.265875	3.76116
Brapa_ESTC016251	AT1G20960	Symbols: EMB1507 | EMB1507 (EMBRYO DEFECTIVE 1507); ATP-dependent helicase | chr1:7302580-7309903 REVERSE	1045.59	278.069	0.265945	3.76018
Brapa_ESTC020418	AT2G24260	Symbols: | basic helix-loop-helix (bHLH) family protein | chr2:10326726-10329257 REVERSE	1083.69	288.865	0.266557	3.75154
Brapa_ESTC017785	AT1G33240	Symbols: AT-GTL2 | AT-GTL1 (Arabidopsis thaliana GT2-like 1); transcription factor | chr1:12051839-12054300 REVERSE	1096.18	293.077	0.267362	3.74025
Brapa_ESTC033131	AT3G49390	Symbols: CID10 | CID10; RNA binding | chr3:18325886-18328643 REVERSE	1425.55	381.704	0.267759	3.7347
Brapa_ESTC005752	AT3G20550	| Symbols: DDL | DDL (DAWDLE) | chr3:7174701-7177606 REVERSE	1465.14	393.678	0.268697	3.72167
Brapa_ESTC006966	AT2G46830	Symbols: CCA1 | CCA1 (CIRCADIAN CLOCK ASSOCIATED 1); transcription factor | chr2:19253965-19255786 FORWARD	1768.62	475.991	0.269131	3.71566
Brapa_ESTC026201	AT5G41460	| Symbols: | fringe-related protein | chr5:16606952-16609425 REVERSE	1505.08	406.428	0.270037	3.70319
Brapa_ESTC016130	AT4G14605	Symbols: | mitochondrial transcription termination factor-related / mTERF-related | chr4:8378810-8380412 FORWARD	1714.47	463.288	0.270222	3.70066
Brapa_ESTC049043	no_hits_f	---------	1785.66	482.656	0.270296	3.69965
Brapa_ESTC024587	AT4G10620	Symbols: | similar to GTP binding [Arabidopsis thaliana] (TAIR:AT3G57180.1); similar to SDL-1 protein [Medicago truncatula] (GB:ABD33306.1); similar to Os06g0498900 [Oryza sativa (japonica cultivar-group)] (GB:NP_001057702.1); similar to Os09g0364500 [Oryza sativa (japonica cultivar-group)] (GB:NP_001063000.1); contains domain GTP-BINDING PROTEIN-RELATED PLANT/BACTERIA (PTHR11089:SF3); contains d…	1200.23	326.861	0.272332	3.67199
Brapa_ESTC032745	AT3G20080	Symbols: CYP705A15 | CYP705A15 (cytochrome P450, family 705, subfamily A, polypeptide 15); oxygen binding | chr3:7008819-7010469 FORWARD	1402.25	383.113	0.273213	3.66015
Brapa_ESTC011733	AT4G30210	Symbols: AR2, ATR2 | ATR2 (ARABIDOPSIS P450 REDUCTASE 2) | chr4:14796906-14800584 FORWARD	1759.48	481.594	0.273714	3.65345
Brapa_ESTC043892	AT3G59480	Symbols: | pfkB-type carbohydrate kinase family protein | chr3:21994080-21995417 FORWARD	1747.17	478.447	0.273841	3.65175
Brapa_ESTC019235	AT4G18010	Symbols: IP5PII | IP5PII (INOSITOL POLYPHOSPHATE 5-PHOSPHATASE II); inositol-polyphosphate 5-phosphatase | chr4:9991206-9994111 REVERSE	1402.26	384.468	0.274177	3.64727
Brapa_ESTC018555	AT4G00650	| Symbols: FLA, FRI | FRI (FRIGIDA) | chr4:269026-270363 FORWARD	1204.52	331.137	0.274912	3.63753
Brapa_ESTC028304	no_hits_f	---------	1542.21	424.644	0.275348	3.63177
Brapa_ESTC038630	AT2G36950	Symbols: | heavy-metal-associated domain-containing protein | chr2:15522295-15523833 FORWARD	1282.84	354.502	0.276342	3.61871
Brapa_ESTC006626	AT3G03570	Symbols: | similar to signal transducer [Arabidopsis thaliana] (TAIR:AT4G40050.1); similar to unknown protein [Oryza sativa (japonica cultivar-group)] (GB:BAD54686.1); contains domain FAMILY NOT NAMED (PTHR21243); contains domain SUBFAMILY NOT NAMED (PTHR21243:SF2) | chr3:857020-860112 FORWARD	1518.71	419.935	0.276508	3.61654
Brapa_ESTC003226	AT2G34650	Symbols: ABR, PID | PID (PINOID); kinase | chr2:14597013-14598636 REVERSE	1451.83	402.396	0.277165	3.60796
Brapa_ESTC025922	AT4G32400	Symbols: | mitochondrial substrate carrier family protein | chr4:15638692-15640244 FORWARD	1710.94	474.471	0.277316	3.60599
Brapa_ESTC049629	no_hits_f	---------	1291.76	358.621	0.277622	3.60202
Brapa_ESTC023113	AT5G36220	Symbols: CYP91A1, CYP81D1 | CYP81D1 (CYTOCHROME P450 91A1); oxygen binding | chr5:14271057-14273245 REVERSE	1005.78	279.306	0.277701	3.601
Brapa_ESTC016009	AT1G15130	Symbols: | hydroxyproline-rich glycoprotein family protein | chr1:5206212-5209843 REVERSE	1326.86	369.323	0.278344	3.59268
Brapa_ESTC016893	AT1G27590	Symbols: | similar to phosphatidylinositol 3- and 4-kinase family protein [Arabidopsis thaliana] (TAIR:AT1G27570.1); similar to Os07g0693900 [Oryza sativa (japonica cultivar-group)] (GB:NP_001060734.1); similar to PREDICTED: similar to Symplekin isoform 1 [Bos taurus] (GB:XP_585791.2); similar to PREDICTED: similar to Symplekin [Canis familiaris] (GB:XP_533638.2); contains domain ARM repeat (SSF4…	1738.44	487.603	0.280483	3.56528
Brapa_ESTC018829	AT2G40730	Symbols: | HEAT repeat-containing protein | chr2:16997161-17003150 REVERSE	1375.69	386.859	0.281211	3.55605
Brapa_ESTC048439	AT3G22330	Symbols: | DEAD box RNA helicase, putative | chr3:7892648-7895152 FORWARD	1108.39	312.182	0.281654	3.55046
Brapa_ESTC044501	no_hits_f	---------	1680.75	474.472	0.282298	3.54236
Brapa_ESTC038289	no_hits_f	---------	1497.81	423.665	0.282856	3.53536
Brapa_ESTC025027	AT3G09370	Symbols: ATMYB3R3, MYB3R-3 | MYB3R-3 (myb domain protein 3R-3) | chr3:2879540-2882134 FORWARD	1423.39	403.368	0.283385	3.52876
Brapa_ESTC009027	AT1G12000	Symbols: | pyrophosphate--fructose-6-phosphate 1-phosphotransferase beta subunit, putative / pyrophosphate-dependent 6-phosphofructose-1-kinase, putative | chr1:4050157-4053725 REVERSE	1357.65	384.89	0.283497	3.52737
Brapa_ESTC030799	AT5G18260	Symbols: | protein binding / zinc ion binding | chr5:6036228-6037297 REVERSE	1575.6	447.84	0.284235	3.51822
Brapa_ESTC013252	AT3G43270	Symbols: | pectinesterase family protein | chr3:15233390-15236112 REVERSE	1451.37	412.812	0.284429	3.51581
Brapa_ESTC010166	AT3G09570	Symbols: | similar to unknown protein [Arabidopsis thaliana] (TAIR:AT5G18520.1); similar to Os01g0836800 [Oryza sativa (japonica cultivar-group)] (GB:NP_001044733.1); similar to Os05g0462500 [Oryza sativa (japonica cultivar-group)] (GB:NP_001055767.1); similar to unknown [Sorghum bicolor] (GB:AAQ06259.1); contains InterPro domain Lung seven transmembrane receptor; (InterPro:IPR009637) | chr3:2940…	1719.39	489.647	0.284779	3.51149
Brapa_ESTC026548	AT5G64300	Symbols: ATGCH | ATGCH (Arabidopsis thaliana GTP cyclohydrolase II); 3,4-dihydroxy-2-butanone-4-phosphate synthase/ GTP cyclohydrolase II | chr5:25735685-25738016 FORWARD	1410.03	401.654	0.284855	3.51056
Brapa_ESTC024285	AT3G55410	Symbols: | 2-oxoglutarate dehydrogenase E1 component, putative / oxoglutarate decarboxylase, putative / alpha-ketoglutaric dehydrogenase, putative | chr3:20552874-20556705 FORWARD	1716.68	489.676	0.285246	3.50575
Brapa_ESTC048109	no_hits_f	---------	1146.09	326.987	0.285307	3.505
Brapa_ESTC016892	AT4G33495	Symbols: RPD1 | RPD1 (ROOT PRIMORDIUM DEFECTIVE 1) | chr4:16111352-16112581 REVERSE	1171.51	335.213	0.286138	3.49482
Brapa_ESTC023587	AT1G73720	Symbols: | transducin family protein / WD-40 repeat family protein | chr1:27728720-27733383 FORWARD	1301.22	372.86	0.286546	3.48984
Brapa_ESTC042089	AT4G16080	Symbols: | similar to unknown protein [Arabidopsis thaliana] (TAIR:AT2G45940.1); contains InterPro domain Protein of unknown function DUF295; (InterPro:IPR005174) | chr4:9101475-9102624 REVERSE	1276.88	365.953	0.286599	3.48919
Brapa_ESTC001420	AT1G15740	Symbols: | leucine-rich repeat family protein | chr1:5411504-5414539 FORWARD	1502.27	430.943	0.286861	3.48601
Brapa_ESTC002536	AT5G38420	Symbols: | ribulose bisphosphate carboxylase small chain 2B / RuBisCO small subunit 2B (RBCS-2B) (ATS2B) | chr5:15398433-15399208 REVERSE	1216.36	349.148	0.287043	3.48379
Brapa_ESTC028254	no_hits_f	---------	1054.14	303.228	0.287654	3.47639
Brapa_ESTC013280	AT3G26780	| Symbols: | catalytic | chr3:9849984-9851514 FORWARD	1308.75	379.273	0.289798	3.45068
Brapa_ESTC011495	AT1G61730	Symbols: | DNA-binding storekeeper protein-related | chr1:22797112-22798242 REVERSE	1324.08	384.018	0.290026	3.44796
Brapa_ESTC019402	AT2G32930	Symbols: ZFN2 | ZFN2 (ZINC FINGER PROTEIN 2); nucleic acid binding | chr2:13973067-13975496 REVERSE	1550.15	449.757	0.290138	3.44664
Brapa_ESTC036904	AT3G11650	Symbols: NHL2 | NHL2 (NDR1/HIN1-like 2) | chr3:3676270-3676992 REVERSE	1302.95	379.217	0.291045	3.4359
Brapa_ESTC014902	AT5G14170	Symbols: | SWIB complex BAF60b domain-containing protein | chr5:4568698-4570446 REVERSE	1606.41	469.071	0.292	3.42466
Brapa_ESTC041924	AT2G42450	Symbols: | lipase class 3 family protein | chr2:17679503-17681932 REVERSE	1416.27	413.97	0.292296	3.42119
Brapa_ESTC043895	AT3G59470	Symbols: | far-red impaired responsive family protein / FAR1 family protein | chr3:21990076-21991074 REVERSE	1244.03	363.969	0.292573	3.41796
Brapa_ESTC003901	no_hits_f	---------	1090.32	319.228	0.292784	3.41549
Brapa_ESTC002805	AT1G08370	| Symbols: DCP1 | DCP1 (DECAPPING 1) | chr1:2638352-2640364 FORWARD	1162.59	341.152	0.293441	3.40784
Brapa_ESTC002557	AT5G19860	Symbols: | similar to unknown protein [Arabidopsis thaliana] (TAIR:AT1G55265.1); similar to Protein of unknown function DUF538 [Medicago truncatula] (GB:ABE78677.1); contains InterPro domain Protein of unknown function DUF538; (InterPro:IPR007493) | chr5:6714535-6715839 REVERSE	1070.55	314.825	0.294078	3.40046
Brapa_ESTC039249	AT5G38700	Symbols: | similar to unknown protein [Arabidopsis thaliana] (TAIR:AT4G02170.1); similar to At5g38700 [Medicago truncatula] (GB:ABE84418.1) | chr5:15506920-15507468 FORWARD	1254.55	369.21	0.294297	3.39793
Brapa_ESTC026494	AT5G23370	Symbols: | GRAM domain-containing protein / ABA-responsive protein-related | chr5:7863545-7864204 REVERSE	1125.16	331.791	0.294883	3.39117
Brapa_ESTC013965	AT2G01150	Symbols: RHA2B | RHA2B (RING-H2 FINGER PROTEIN 2B); protein binding / zinc ion binding | chr2:100702-101145 FORWARD	1153.84	340.278	0.294909	3.39087
Brapa_ESTC051192	no_hits_f	---------	1330.61	396.72	0.298149	3.35403
Brapa_ESTC026383	AT5G47390	Symbols: | myb family transcription factor | chr5:19244228-19245773 FORWARD	1573.65	469.204	0.298163	3.35387
Brapa_ESTC010311	AT3G06180	Symbols: | structural constituent of ribosome | chr3:1871711-1873560 FORWARD	1434.5	429.095	0.299125	3.34308
Brapa_ESTC021350	AT4G09560	Symbols: | peptidase/ protein binding / zinc ion binding | chr4:6041649-6043678 REVERSE	1233.78	369.401	0.299406	3.33995
Brapa_ESTC019530	AT5G45950	Symbols: | GDSL-motif lipase/hydrolase family protein | chr5:18651382-18653739 FORWARD	1438.56	433.603	0.301415	3.31769
Brapa_ESTC027360	AT4G05050	Symbols: UBQ11 | UBQ11 (UBIQUITIN 11); protein binding | chr4:2588269-2588958 REVERSE	1424.92	429.571	0.30147	3.31708
Brapa_ESTC010488	AT3G07390	Symbols: AIR12 | AIR12 (Auxin-Induced in Root cultures 12); extracellular matrix structural constituent | chr3:2365458-2366279 FORWARD	1326.1	401.924	0.303087	3.29938
Brapa_ESTC027718	AT1G67310	Symbols: | calmodulin binding / transcription regulator | chr1:25201845-25206789 REVERSE	1521.65	461.288	0.30315	3.2987
Brapa_ESTC015100	AT2G38840	Symbols: | guanylate-binding family protein | chr2:16234407-16239193 FORWARD	1338.67	406.831	0.303907	3.29048
Brapa_ESTC012445	AT3G17910	| Symbols: SURF1 | SURF1 (SURFEIT 1) | chr3:6133587-6136059 FORWARD	1109.54	337.26	0.303964	3.28987
Brapa_ESTC032135	AT5G12410	Symbols: | THUMP domain-containing protein | chr5:4021975-4023951 REVERSE	1401.62	426.518	0.304304	3.28619
Brapa_ESTC010342	AT3G22550	Symbols: | senescence-associated protein-related | chr3:7991834-7992812 REVERSE	1230.25	375.431	0.305166	3.2769
Brapa_ESTC043153	AT3G18520	Symbols: HDA15 | HDA15 (histone deacetylase 15); histone deacetylase | chr3:6361611-6365405 FORWARD	1225.1	374.631	0.305796	3.27015
Brapa_ESTC025244	AT1G16190	Symbols: | DNA repair protein RAD23, putative | chr1:5543261-5545886 FORWARD	1352.86	414.711	0.306544	3.26218
Brapa_ESTC011053	AT5G51070	Symbols: CLPD, ERD1 | ERD1 (EARLY RESPONSIVE TO DEHYDRATION 1); ATP binding / ATPase | chr5:20781705-20785707 FORWARD	1301.68	400.736	0.307861	3.24822
Brapa_ESTC023420	AT5G20200	| Symbols: | nucleoporin-related | chr5:6816778-6821622 FORWARD	1303.58	401.467	0.307973	3.24704
Brapa_ESTC002850	AT1G11650	Symbols: ATRBP45B | ATRBP45B; RNA binding | chr1:3914895-3917941 FORWARD	1060.61	326.739	0.308067	3.24605
Brapa_ESTC014074	AT3G13680	| Symbols: | F-box family protein | chr3:4477541-4478728 REVERSE	1057.65	326.097	0.308322	3.24336
Brapa_ESTC028107	no_hits_f	---------	1304.75	402.546	0.308523	3.24124
Brapa_ESTC006314	AT3G59470	Symbols: | far-red impaired responsive family protein / FAR1 family protein | chr3:21990076-21991074 REVERSE	1409.33	435.158	0.308769	3.23866
Brapa_ESTC017528	AT1G52880	Symbols: ANAC018, ATNAM, NAM | NAM (Arabidopsis NAC domain containing protein 18); transcription factor | chr1:19692953-19694098 REVERSE	1003.29	309.943	0.308927	3.23701
Brapa_ESTC021875	AT4G24390	Symbols: | F-box family protein (FBX14) | chr4:12613919-12615976 REVERSE	1034.8	321.243	0.31044	3.22124
Brapa_ESTC006601	AT5G44290	Symbols: | protein kinase family protein | chr5:17857977-17860417 REVERSE	1255.22	390.302	0.310943	3.21602
Brapa_ESTC022784	AT1G19025	Symbols: | DNA cross-link repair protein-related | chr1:6568911-6570791 FORWARD	1436.29	446.639	0.310967	3.21577
Brapa_ESTC051845	no_hits_f	---------	1486.34	462.99	0.311497	3.21031
Brapa_ESTC037427	AT1G67330	Symbols: | similar to unknown protein [Arabidopsis thaliana] (TAIR:AT1G27930.1); similar to hypothetical protein MA4_111B14.64 [Musa acuminata] (GB:ABF72010.1); contains InterPro domain Protein of unknown function DUF579, plant; (InterPro:IPR006514) | chr1:25217781-25218656 FORWARD	1462.24	456.238	0.312013	3.20499
Brapa_ESTC016556	AT5G17270	Symbols: | tetratricopeptide repeat (TPR)-containing protein | chr5:5679997-5685599 FORWARD	1025.17	320.199	0.312337	3.20167
Brapa_ESTC026721	AT1G12140	Symbols: | flavin-containing monooxygenase family protein / FMO family protein | chr1:4121384-4123364 FORWARD	1066.66	333.472	0.312632	3.19865
Brapa_ESTC014084	AT3G05420	Symbols: ACBP4 | ACBP4 (ACYL-COA BINDING PROTEIN 4, ACYL-COA-BINDING DOMAIN 4); acyl-CoA binding | chr3:1561886-1567053 FORWARD	1331.08	416.484	0.312892	3.19599
Brapa_ESTC025491	AT2G33610	Symbols: CHB2, ATSWI3B | ATSWI3B (Arabidopsis thaliana switching protein 3B); DNA binding | chr2:14236099-14238225 FORWARD	1052.93	329.702	0.313128	3.19358
Brapa_ESTC015251	AT1G34300	Symbols: | lectin protein kinase family protein | chr1:12503428-12505917 FORWARD	1533.97	481.268	0.31374	3.18735
Brapa_ESTC011309	AT1G24310	Symbols: | similar to transporter [Arabidopsis thaliana] (TAIR:AT1G10390.2); similar to Os07g0295400 [Oryza sativa (japonica cultivar-group)] (GB:NP_001059407.1); similar to hypothetical protein DDBDRAFT_0190968 [Dictyostelium discoideum AX4] (GB:XP_646706.1); contains InterPro domain Apolipophorin III-like; (InterPro:IPR011000) | chr1:8624181-8626168 FORWARD	1076.6	338.647	0.314552	3.17912
Brapa_ESTC048026	AT1G05160	Symbols: ATKAO1, KAO1, CYP88A3 | CYP88A3 (ENT-KAURENOIC ACID HYDROXYLASE 1); oxygen binding | chr1:1487639-1489827 REVERSE	1102.67	348.385	0.315947	3.16509
Brapa_ESTC009580	AT3G06410	| Symbols: | nucleic acid binding | chr3:1947477-1949534 REVERSE	1393.58	441.909	0.317103	3.15355
Brapa_ESTC044471	AT4G24080	Symbols: ALL1 | ALL1 (ALDOLASE LIKE); carbon-carbon lyase | chr4:12511394-12512300 FORWARD	1100.98	349.25	0.317217	3.15241
Brapa_ESTC014928	AT2G20190	Symbols: | CLIP-associating protein (CLASP) -related | chr2:8718943-8725894 REVERSE	1190.98	379.174	0.318371	3.14099
Brapa_ESTC035253	AT5G11960	Symbols: | similar to permease-related [Arabidopsis thaliana] (TAIR:AT4G13800.1); similar to hypothetical protein MtrDRAFT_AC152551g11v1 [Medicago truncatula] (GB:ABE86250.1); contains InterPro domain Protein of unknown function DUF6, transmembrane; (InterPro:IPR000620) | chr5:3858853-3861463 REVERSE	1323.93	422.465	0.319099	3.13382
Brapa_ESTC025939	AT2G37230	Symbols: | pentatricopeptide (PPR) repeat-containing protein | chr2:15644256-15646529 REVERSE	1519.98	485.849	0.319642	3.1285
Brapa_ESTC028606	no_hits_f	---------	1417.22	453.321	0.319866	3.12631
Brapa_ESTC013253	AT5G22480	Symbols: | zinc finger (ZPR1-type) family protein | chr5:7451646-7456171 REVERSE	1337.79	427.922	0.319872	3.12625
Brapa_ESTC001084	AT1G23900	Symbols: GAMMA-ADR, GAMMA-ADAPTIN 1 | GAMMA-ADAPTIN 1 (GAMMA-ADAPTIN 1); clathrin binding | chr1:8441368-8447141 FORWARD	1119.46	358.324	0.320086	3.12416
Brapa_ESTC005112	AT3G14075	Symbols: | lipase class 3 family protein | chr3:4663826-4666345 REVERSE	1147.7	369.198	0.321685	3.10863
Brapa_ESTC003885	AT4G27640	Symbols: | importin beta-2 subunit family protein | chr4:13798019-13802982 REVERSE	1444.6	464.91	0.321826	3.10727
Brapa_ESTC048368	no_hits_f	---------	1126.63	363.97	0.323061	3.09539
Brapa_ESTC036433	AT1G08230	Symbols: | similar to amino acid transporter family protein [Arabidopsis thaliana] (TAIR:AT5G41800.1); similar to Os05g0586500 [Oryza sativa (japonica cultivar-group)] (GB:NP_001056462.1); similar to Amino acid/polyamine transporter II [Medicago truncatula] (GB:ABE81500.1); similar to Os01g0857400 [Oryza sativa (japonica cultivar-group)] (GB:NP_001044853.1); contains InterPro domain Amino acid/po…	1128.7	364.872	0.323267	3.09341
Brapa_ESTC008823	AT4G13350	Symbols: | human Rev interacting-like protein-related / hRIP protein-related | chr4:7770166-7773317 REVERSE	1381.42	447.448	0.323904	3.08733
Brapa_ESTC003645	no_hits_f	---------	1527.81	495.998	0.324646	3.08027
Brapa_ESTC009395	no_hits_f	---------	1243.25	406.286	0.326793	3.06004
Brapa_ESTC002846	AT5G19910	| Symbols: | SOH1 family protein | chr5:6731486-6732823 REVERSE	1268.24	415.447	0.327578	3.05271
Brapa_ESTC030366	AT3G21230	Symbols: 4CL5 | 4CL5 (4-COUMARATE:COA LIGASE 5); 4-coumarate-CoA ligase | chr3:7448237-7451953 REVERSE	1090.43	357.411	0.327771	3.05091
Brapa_ESTC018926	AT3G44340	Symbols: CEF | CEF (CLONE EIGHTY-FOUR); transporter | chr3:16023071-16030860 REVERSE	1115.81	367.656	0.329497	3.03493
Brapa_ESTC045644	AT5G14310	Symbols: | similar to unknown protein [Arabidopsis thaliana] (TAIR:AT3G27320.1); similar to CXE carboxylesterase [Actinidia deliciosa] (GB:ABB89022.1); contains InterPro domain Esterase/lipase/thioesterase; (InterPro:IPR000379); contains InterPro domain Alpha/beta hydrolase fold-3; (InterPro:IPR013094) | chr5:4615595-4617425 FORWARD	1349.14	444.763	0.329664	3.03339
Brapa_ESTC047159	AT1G19835	Symbols: | similar to unknown protein [Arabidopsis thaliana] (TAIR:AT1G47900.1); similar to Putative myosin-like protein [Oryza sativa (japonica cultivar-group)] (GB:AAL77142.1); similar to Os03g0246500 [Oryza sativa (japonica cultivar-group)] (GB:NP_001049544.1); contains InterPro domain Prefoldin; (InterPro:IPR009053); contains InterPro domain Protein of unknown function DUF869, plant; (InterPr…	1510.52	498.239	0.329846	3.03172
Brapa_ESTC024350	AT5G05410	Symbols: DREB2, DREB2A | DREB2A (DRE-BINDING PROTEIN 2A); DNA binding / transcription factor/ transcriptional activator | chr5:1602651-1603658 FORWARD	1169.64	386.01	0.330025	3.03008
Brapa_ESTC012319	AT2G14250	Symbols: | ankyrin repeat family protein | chr2:6044056-6045463 FORWARD	1445.19	477.131	0.330151	3.02892
Brapa_ESTC029328	AT3G46450	Symbols: | SEC14 cytosolic factor family protein / phosphoglyceride transfer family protein | chr3:17104282-17106304 REVERSE	1047.49	346.574	0.330861	3.02241
Brapa_ESTC038833	AT3G63010	Symbols: ATGID1B, GID1B | ATGID1B/GID1B (GA INSENSITIVE DWARF1B) | chr3:23300692-23301973 FORWARD	1443.86	478.719	0.331555	3.01609
Brapa_ESTC033752	AT2G15910	Symbols: | CSL zinc finger domain-containing protein | chr2:6939999-6942415 REVERSE	1067.4	354.193	0.331828	3.01361
Brapa_ESTC025118	AT1G79750	Symbols: ATNADP-ME4 | ATNADP-ME4 (NADP-MALIC ENZYME 4); malate dehydrogenase (oxaloacetate-decarboxylating) (NADP+)/ malic enzyme/ oxidoreductase, acting on NADH or NADPH, NAD or NADP as acceptor | chr1:30012548-30016072 REVERSE	1413.15	471.389	0.333573	2.99784
Brapa_ESTC019792	AT1G22610	Symbols: | C2 domain-containing protein | chr1:7994467-7997556 FORWARD	1197.47	403.153	0.336671	2.97026
Brapa_ESTC016895	AT1G63740	Symbols: | disease resistance protein (TIR-NBS-LRR class), putative | chr1:23649188-23652470 FORWARD	1199.06	403.997	0.336928	2.96799
Brapa_ESTC030395	AT5G11840	Symbols: | similar to unknown protein [Arabidopsis thaliana] (TAIR:AT5G67370.1); similar to Os05g0539900 [Oryza sativa (japonica cultivar-group)] (GB:NP_001056177.1); similar to Protein of unknown function DUF1230 [Medicago truncatula] (GB:ABE85761.1); contains InterPro domain Protein of unknown function DUF1230; (InterPro:IPR009631) | chr5:3813611-3814806 REVERSE	1290.06	435.417	0.337517	2.96281
Brapa_ESTC017487	AT1G79640	| Symbols: | kinase | chr1:29971806-29975983 REVERSE	1171.46	395.484	0.337599	2.96209
Brapa_ESTC047021	AT2G36390	Symbols: BE3, SBE2.1 | SBE2.1 (STARCH BRANCHING ENZYME 2.1); 1,4-alpha-glucan branching enzyme | chr2:15271362-15277019 FORWARD	1253.97	424.271	0.338342	2.95559
Brapa_ESTC009981	AT5G57870	Symbols: | eukaryotic translation initiation factor 4F, putative / eIF-4F, putative | chr5:23456981-23460659 FORWARD	1112.24	377.51	0.339414	2.94625
Brapa_ESTC021716	AT1G61800	Symbols: GPT2 | GPT2 (glucose-6-phosphate/phosphate translocator 2); antiporter/ glucose-6-phosphate transporter | chr1:22828192-22830124 FORWARD	1120.48	381.212	0.340222	2.93926
Brapa_ESTC043783	AT2G26110	Symbols: | similar to unknown protein [Arabidopsis thaliana] (TAIR:AT4G26130.1); similar to cDNA-5-encoded protein (GB:AAA50235.1) | chr2:11128046-11128876 FORWARD	1158.41	394.228	0.340318	2.93843
Brapa_ESTC004721	AT3G06500	Symbols: | beta-fructofuranosidase, putative / invertase, putative / saccharase, putative / beta-fructosidase, putative | chr3:2012315-2015477 FORWARD	1211.55	413.017	0.3409	2.93341
Brapa_ESTC008835	AT5G11700	| Symbols: | glycine-rich protein | chr5:3762962-3771124 REVERSE	1205.99	411.76	0.341429	2.92887
Brapa_ESTC048262	no_hits_f	---------	1036.89	354.286	0.341681	2.9267
Brapa_ESTC018759	AT1G50200	Symbols: ACD, ALATS | ALATS (ALANYL-TRNA SYNTHETASE); ATP binding / alanine-tRNA ligase/ nucleic acid binding | chr1:18595097-18601979 REVERSE	1428.06	487.974	0.341704	2.92651
Brapa_ESTC017465	AT1G30970	Symbols: SUF4 | SUF4 (SUPPRESSOR OF FRIGIDA4) | chr1:11040594-11043414 REVERSE	1104.5	377.929	0.342172	2.92251
Brapa_ESTC018916	AT1G28260	| Symbols: | binding | chr1:9875763-9878769 REVERSE	1242.04	425.435	0.342529	2.91946
Brapa_ESTC007831	AT3G59480	Symbols: | pfkB-type carbohydrate kinase family protein | chr3:21994080-21995417 FORWARD	1290.47	444.072	0.344116	2.90599
Brapa_ESTC009066	AT2G38000	Symbols: | chaperone protein dnaJ-related | chr2:15910393-15912354 REVERSE	1220.54	420.286	0.344344	2.90407
Brapa_ESTC014150	AT5G13480	| Symbols: FY | FY (FY) | chr5:4326641-4331560 REVERSE	1059.49	367.041	0.346432	2.88657
Brapa_ESTC009045	AT3G11540	Symbols: SPY | SPY (SPINDLY); transferase, transferring glycosyl groups | chr3:3632848-3637553 FORWARD	1234.77	428.262	0.346835	2.88321
Brapa_ESTC003191	AT5G62570	Symbols: | calmodulin-binding protein | chr5:25132214-25134193 FORWARD	1180.05	410.582	0.347936	2.87409
Brapa_ESTC029956	AT4G01400	Symbols: | pentatricopeptide (PPR) repeat-containing protein | chr4:573098-577243 REVERSE	1425.75	496.286	0.348088	2.87284
Brapa_ESTC014558	AT5G56730	Symbols: | peptidase M16 family protein / insulinase family protein | chr5:22964132-22969802 REVERSE	1236.25	431.224	0.348816	2.86684
Brapa_ESTC025895	AT5G22350	Symbols: | similar to unknown protein [Arabidopsis thaliana] (TAIR:AT5G06180.2); similar to OSIGBa0137L20.3 [Oryza sativa (indica cultivar-group)] (GB:CAH66474.1); similar to Protein of unknown function DUF1022 [Rhodospirillum rubrum ATCC 11170] (GB:YP_427067.1); similar to Os04g0414000 [Oryza sativa (japonica cultivar-group)] (GB:NP_001052751.1); contains InterPro domain Protein of unknown funct…	1129.56	394.922	0.349625	2.86021
Brapa_ESTC025762	AT4G17830	Symbols: | peptidase M20/M25/M40 family protein | chr4:9915929-9918062 FORWARD	1258.76	440.44	0.3499	2.85796
Brapa_ESTC041603	AT2G33340	Symbols: | transducin family protein / WD-40 repeat family protein | chr2:14133540-14138076 REVERSE	1061.54	372.34	0.350755	2.851
Brapa_ESTC024674	AT5G19980	Symbols: | integral membrane family protein | chr5:6749909-6750934 REVERSE	1173.52	411.768	0.350883	2.84995
Brapa_ESTC023723	AT4G23320	Symbols: | protein kinase family protein | chr4:12189192-12191636 REVERSE	1003.62	352.831	0.351558	2.84448
Brapa_ESTC009153	AT1G24530	Symbols: | transducin family protein / WD-40 repeat family protein | chr1:8693274-8694530 FORWARD	1187.35	417.806	0.351881	2.84187
Brapa_ESTC012766	AT5G11710	| Symbols: | (EPSIN1); binding | chr5:3772982-3776317 FORWARD	1270.64	450.316	0.354401	2.82166
Brapa_ESTC024164	AT4G22760	Symbols: | pentatricopeptide (PPR) repeat-containing protein | chr4:11958488-11962881 FORWARD	1195.61	424.917	0.355398	2.81375
Brapa_ESTC018943	AT5G06970	Symbols: | similar to unknown protein [Arabidopsis thaliana] (TAIR:AT2G20010.2); similar to unknown protein [Oryza sativa (japonica cultivar-group)] (GB:AAP68377.1); similar to Protein of unknown function DUF810 [Medicago truncatula] (GB:ABE85501.1); similar to unknown protein [Oryza sativa] (GB:AAK14418.1); contains InterPro domain Protein of unknown function DUF810; (InterPro:IPR008528) | chr5:…	1369.18	488.793	0.356997	2.80114
Brapa_ESTC011553	AT1G11270	| Symbols: | F-box family protein | chr1:3785833-3786653 REVERSE	1007.24	360.387	0.357797	2.79488
Brapa_ESTC044766	AT4G31200	Symbols: | SWAP (Suppressor-of-White-APricot)/surp domain-containing protein | chr4:15162329-15164574 REVERSE	1344.71	482.614	0.358898	2.78631
Brapa_ESTC002331	AT4G37000	Symbols: ATRCCR, ACD2 | ACD2 (ACCELERATED CELL DEATH 2) | chr4:17442621-17443756 FORWARD	1001.24	359.707	0.359262	2.78349
Brapa_ESTC016101	no_hits_f	---------	1125.03	404.648	0.359678	2.78027
Brapa_ESTC019381	AT1G10770	Symbols: | invertase/pectin methylesterase inhibitor family protein | chr1:3591860-3592363 REVERSE	1312	472.017	0.359769	2.77956
Brapa_ESTC002411	AT5G33320	Symbols: PPT, ARAPPT, CUE1 | CUE1 (CAB UNDEREXPRESSED 1); antiporter/ triose-phosphate transporter | chr5:12606180-12608638 FORWARD	1051.8	379.366	0.360683	2.77252
Brapa_ESTC030820	no_hits_f	---------	1137.75	410.395	0.360708	2.77233
Brapa_ESTC029418	AT4G22720	Symbols: | glycoprotease M22 family protein | chr4:11937478-11938728 FORWARD	1321.88	477.194	0.360996	2.77011
Brapa_ESTC018361	AT4G27020	Symbols: | similar to unknown protein [Arabidopsis thaliana] (TAIR:AT1G70160.1); similar to unknown protein [Arabidopsis thaliana] (TAIR:AT5G54870.1); similar to unknown protein [Oryza sativa (japonica cultivar-group)] (GB:BAD53001.1); similar to unknown protein [Oryza sativa (japonica cultivar-group)] (GB:BAB89049.1); similar to conserved hypothetical protein [Medicago truncatula] (GB:ABE93629.1…	1212.77	438.603	0.361654	2.76507
Brapa_ESTC015461	AT5G51440	Symbols: | 23.5 kDa mitochondrial small heat shock protein (HSP23.5-M) | chr5:20908468-20909239 FORWARD	1135.41	411.406	0.362341	2.75983
Brapa_ESTC016228	AT2G36390	Symbols: BE3, SBE2.1 | SBE2.1 (STARCH BRANCHING ENZYME 2.1); 1,4-alpha-glucan branching enzyme | chr2:15271362-15277019 FORWARD	1024.82	371.395	0.3624	2.75938
Brapa_ESTC029761	AT4G03260	Symbols: | leucine-rich repeat family protein | chr4:1429092-1431431 FORWARD	1240.33	450.388	0.363119	2.75391
Brapa_ESTC020506	AT2G19380	Symbols: | RNA recognition motif (RRM)-containing protein | chr2:8390938-8393686 FORWARD	1115.36	405.055	0.363161	2.7536
Brapa_ESTC039546	AT1G13340	Symbols: | similar to unknown protein [Arabidopsis thaliana] (TAIR:AT4G35730.1); similar to unknown protein [Arabidopsis thaliana] (TAIR:AT1G34220.2); similar to expressed protein [Oryza sativa (japonica cultivar-group)] (GB:ABF95057.1); similar to Os03g0710000 [Oryza sativa (japonica cultivar-group)] (GB:NP_001051046.1); contains InterPro domain Protein of unknown function DUF292, eukaryotic; (I…	1032.52	375.063	0.36325	2.75292
Brapa_ESTC015974	AT2G07360	Symbols: | SH3 domain-containing protein | chr2:3047620-3057096 REVERSE	1183.18	429.846	0.363297	2.75257
Brapa_ESTC019102	AT1G63090	Symbols: ATPP2-A11 | ATPP2-A11 (Phloem protein 2-A11) | chr1:23394948-23396274 REVERSE	1226.47	445.82	0.363498	2.75104
Brapa_ESTC021737	AT1G80350	Symbols: AAA1, LUE1, FRA2, ATKTN1, KTN1, FRC2, BOT1, FTR, ERH3 | ERH3 (ECTOPIC ROOT HAIR 3); ATP binding / nucleoside-triphosphatase/ nucleotide binding | chr1:30210391-30212942 REVERSE	1127.2	409.879	0.363626	2.75008
Brapa_ESTC032968	AT4G30680	Symbols: | MA3 domain-containing protein | chr4:14958693-14960018 REVERSE	1072.51	393.458	0.366857	2.72586
Brapa_ESTC016003	AT3G07610	Symbols: | transcription factor jumonji (jmjC) domain-containing protein | chr3:2426154-2429364 FORWARD	1303.98	478.566	0.367004	2.72477
Brapa_ESTC024252	AT3G51120	Symbols: | zinc finger (CCCH-type) family protein | chr3:18997006-19002680 REVERSE	1128.64	414.702	0.367435	2.72157
Brapa_ESTC000797	AT4G31340	Symbols: | myosin heavy chain-related | chr4:15205668-15208956 FORWARD	1072.4	394.525	0.36789	2.71821
Brapa_ESTC013579	AT5G16120	Symbols: | hydrolase, alpha/beta fold family protein | chr5:5266051-5267778 FORWARD	1013.88	374.435	0.369309	2.70776
Brapa_ESTC001937	AT2G28380	Symbols: DRB2 | DRB2 (DSRNA-BINDING PROTEIN 2); double-stranded RNA binding | chr2:12141175-12142992 REVERSE	1329.05	491.704	0.369967	2.70295
Brapa_ESTC005523	AT5G51990	Symbols: CBF4, DREB1D | CBF4/DREB1D (C- REPEAT-BINDING FACTOR 4); DNA binding / transcription factor/ transcriptional activator | chr5:21134339-21135013 REVERSE	1150.88	425.998	0.37015	2.70161
Brapa_ESTC024954	AT3G19580	Symbols: AZF2 | AZF2 (ARABIDOPSIS ZINC-FINGER PROTEIN 2); nucleic acid binding / transcription factor/ zinc ion binding | chr3:6803299-6804120 REVERSE	1094.33	405.218	0.370289	2.7006
Brapa_ESTC011115	AT1G03260	Symbols: | similar to unknown protein [Arabidopsis thaliana] (TAIR:AT5G19070.1); similar to DedA [Crocosphaera watsonii WH 8501] (GB:ZP_00516070.1); similar to Os07g0655900 [Oryza sativa (japonica cultivar-group)] (GB:NP_001060500.1); contains domain UNCHARACTERIZED (PTHR12677) | chr1:795678-798102 REVERSE	1098.1	407.471	0.371069	2.69492
Brapa_ESTC016143	AT5G19600	Symbols: SULTR3;5 | SULTR3;5 (SULTR3;5); sulfate transporter | chr5:6613115-6616893 REVERSE	1142.49	424.702	0.371734	2.6901
Brapa_ESTC003221	AT1G26630	Symbols: | eukaryotic translation initiation factor 5A, putative / eIF-5A, putative | chr1:9205955-9207085 FORWARD	1192.58	443.514	0.371895	2.68893
Brapa_ESTC047412	AT3G54810	Symbols: BME3-ZF, BME3 | BME3/BME3-ZF (BLUE MICROPLYLAR END3); transcription factor | chr3:20307935-20309214 FORWARD	1133.99	422.195	0.372309	2.68594
Brapa_ESTC042820	AT3G13300	Symbols: VCS | VCS (VARICOSE); nucleotide binding | chr3:4304092-4309956 FORWARD	1146.81	428.96	0.374046	2.67347
Brapa_ESTC007755	AT3G14790	Symbols: RHM3 | RHM3 (RHAMNOSE BIOSYNTHESIS 3); catalytic | chr3:4964798-4966882 FORWARD	1288.99	483.816	0.375345	2.66422
Brapa_ESTC046261	AT5G55050	Symbols: | GDSL-motif lipase/hydrolase family protein | chr5:22354971-22356967 FORWARD	1232.62	463.987	0.376423	2.65658
Brapa_ESTC024489	AT5G16520	Symbols: | similar to Os01g0100500 [Oryza sativa (japonica cultivar-group)] (GB:NP_001041736.1) | chr5:5394743-5397374 REVERSE	1191.57	450.257	0.377869	2.64642
Brapa_ESTC046179	AT5G47530	Symbols: | auxin-responsive protein, putative | chr5:19298698-19300097 FORWARD	1198.26	453.34	0.378332	2.64318
Brapa_ESTC020241	AT5G09330	Symbols: ANAC082 | ANAC082 (Arabidopsis NAC domain containing protein 82) | chr5:2892624-2894709 REVERSE	1022.87	387.971	0.379296	2.63646
Brapa_ESTC006696	AT5G36880	Symbols: | AMP binding / acetate-CoA ligase/ catalytic | chr5:14552191-14557526 REVERSE	1287.3	489.284	0.380085	2.63099
Brapa_ESTC028964	AT1G30470	Symbols: | SIT4 phosphatase-associated family protein | chr1:10779405-10786397 FORWARD	1262.25	480.01	0.380281	2.62963
Brapa_ESTC047855	AT1G19450	Symbols: | integral membrane protein, putative / sugar transporter family protein | chr1:6731662-6734624 REVERSE	1098.14	418.068	0.380706	2.6267
Brapa_ESTC027863	AT3G28970	Symbols: | similar to unknown protein [Arabidopsis thaliana] (TAIR:AT3G12760.1); similar to Protein of unknown function DUF298 [Medicago truncatula] (GB:ABE80372.1); contains InterPro domain Protein of unknown function DUF298; (InterPro:IPR005176) | chr3:10989207-10991019 REVERSE	1178.82	449.189	0.38105	2.62433
Brapa_ESTC006671	AT3G20100	Symbols: CYP705A19 | CYP705A19 (cytochrome P450, family 705, subfamily A, polypeptide 19); oxygen binding | chr3:7019020-7020655 FORWARD	1176.71	448.868	0.38146	2.62151
Brapa_ESTC007297	AT3G52480	Symbols: | similar to unknown protein [Arabidopsis thaliana] (TAIR:AT3G11640.1) | chr3:19463456-19464085 REVERSE	1169.12	447.516	0.38278	2.61247
Brapa_ESTC026619	AT1G16190	Symbols: | DNA repair protein RAD23, putative | chr1:5543261-5545886 FORWARD	1025.99	393.711	0.383738	2.60595
Brapa_ESTC003559	AT5G11560	| Symbols: | catalytic | chr5:3709735-3713995 REVERSE	1041.46	400.567	0.384621	2.59996
Brapa_ESTC047849	no_hits_f	---------	1127.28	434.148	0.385129	2.59653
Brapa_ESTC047601	AT1G32340	Symbols: NHL8 | NHL8 (NDR1/HIN1-like 8); protein binding / zinc ion binding | chr1:11663442-11666017 REVERSE	1151.37	444.192	0.385794	2.59205
Brapa_ESTC012535	AT2G37130	Symbols: | peroxidase 21 (PER21) (P21) (PRXR5) | chr2:15605304-15607083 REVERSE	1080.79	417.362	0.386164	2.58957
Brapa_ESTC020643	AT3G61150	Symbols: HDG1 | HDG1 (HOMEODOMAIN GLABROUS1); DNA binding / transcription factor | chr3:22641744-22645850 FORWARD	1154.67	447.22	0.387314	2.58188
Brapa_ESTC023068	AT3G13720	Symbols: | prenylated rab acceptor (PRA1) family protein | chr3:4495209-4495775 REVERSE	1032.97	404.488	0.391578	2.55377
Brapa_ESTC021870	AT2G24640	Symbols: | ubiquitin carboxyl-terminal hydrolase family protein / zinc finger (MYND type) family protein | chr2:10482692-10486420 REVERSE	1152.88	452.521	0.392514	2.54768
Brapa_ESTC037363	AT4G11420	Symbols: ATEIF3A-1, EIF3A-1, ATTIF3A1, TIF3A1, EIF3A | EIF3A (eukaryotic translation initiation factor 3A) | chr4:6947829-6952048 REVERSE	999.979	392.753	0.392761	2.54608
Brapa_ESTC010046	AT5G35980	Symbols: | protein kinase family protein | chr5:14145781-14153214 FORWARD	1053.05	416.694	0.395702	2.52715
Brapa_ESTC035542	AT3G56250	Symbols: | similar to expressed protein [Oryza sativa (japonica cultivar-group)] (GB:ABA96219.1) | chr3:20877099-20878819 FORWARD	1202.1	476.083	0.396043	2.52498
Brapa_ESTC003294	AT3G06400	Symbols: CHR11 | CHR11 (CHROMATIN-REMODELING PROTEIN 11); DNA-dependent ATPase | chr3:1941072-1946706 FORWARD	1045.06	414.329	0.396464	2.5223
Brapa_ESTC032167	AT1G59740	Symbols: | proton-dependent oligopeptide transport (POT) family protein | chr1:21971892-21975977 FORWARD	1164.82	461.886	0.39653	2.52188
Brapa_ESTC003058	AT2G31400	Symbols: | pentatricopeptide (PPR) repeat-containing protein | chr2:13394278-13397627 REVERSE	1207.42	480.237	0.397738	2.51422
Brapa_ESTC027411	AT5G11560	| Symbols: | catalytic | chr5:3709735-3713995 REVERSE	1182.59	470.414	0.397783	2.51393
Brapa_ESTC021693	AT3G43210	Symbols: TES | TES (TETRASPORE); microtubule motor | chr3:15202417-15207009 FORWARD	1227.1	488.548	0.398132	2.51173
Brapa_ESTC010731	AT3G08760	| Symbols: ATSIK | ATSIK; kinase | chr3:2658135-2659990 REVERSE	1189.51	473.938	0.398431	2.50984
Brapa_ESTC015059	AT1G15780	Symbols: | similar to unknown protein [Arabidopsis thaliana] (TAIR:AT2G10440.1); similar to Globin-like [Medicago truncatula] (GB:ABE79971.1); similar to Os08g0564800 [Oryza sativa (japonica cultivar-group)] (GB:NP_001062533.1); similar to CTV.22 [Poncirus trifoliata] (GB:AAN62354.1); contains domain no description (G3D.1.10.246.20); contains domain Kix domain of CBP (creb binding protein) (SSF47…	1237.47	496.518	0.401236	2.4923
Brapa_ESTC018795	AT5G38840	Symbols: | forkhead-associated domain-containing protein / FHA domain-containing protein | chr5:15568559-15572076 FORWARD	1000.86	402.866	0.40252	2.48435
Brapa_ESTC006285	AT3G59990	Symbols: MAP2B | MAP2B (METHIONINE AMINOPEPTIDASE 2B); methionyl aminopeptidase | chr3:22166898-22169528 REVERSE	1002.98	404.745	0.403542	2.47805
Brapa_ESTC026278	AT4G32520	Symbols: SHM3 | SHM3 (SERINE HYDROXYMETHYLTRANSFERASE 3); glycine hydroxymethyltransferase | chr4:15689648-15692340 REVERSE	1137.53	460.14	0.404508	2.47214
Brapa_ESTC028198	AT3G61310	Symbols: | DNA-binding family protein | chr3:22701774-22703420 REVERSE	1095.44	443.399	0.404768	2.47055
Brapa_ESTC036203	AT4G15240	| Symbols: | fringe-related protein | chr4:8703518-8705378 REVERSE	1165.79	474.359	0.406899	2.45761
Brapa_ESTC016134	AT3G52430	Symbols: PAD4 | PAD4 (PHYTOALEXIN DEFICIENT 4); triacylglycerol lipase | chr3:19442544-19445270 FORWARD	1062.85	434.49	0.408797	2.4462
Brapa_ESTC000625	AT1G30820	Symbols: | CTP synthase, putative / UTP--ammonia ligase, putative | chr1:10945232-10948806 REVERSE	1215.48	497.078	0.408956	2.44525
Brapa_ESTC029048	AT2G19130	Symbols: | S-locus lectin protein kinase family protein | chr2:8300871-8303357 FORWARD	1144.47	468.376	0.409251	2.44349
Brapa_ESTC028127	AT3G09160	Symbols: | RNA recognition motif (RRM)-containing protein | chr3:2805784-2806917 REVERSE	1099.61	454.139	0.413	2.42131
Brapa_ESTC023295	AT3G15500	Symbols: ANAC055, ATNAC3 | ATNAC3 (ARABIDOPSIS NAC DOMAIN CONTAINING PROTEIN 55); transcription factor | chr3:5234738-5235889 FORWARD	1004.4	415.126	0.413307	2.41951
Brapa_ESTC011963	AT3G18050	Symbols: | similar to unknown protein [Arabidopsis thaliana] (TAIR:AT4G28100.1); similar to hypothetical protein MtrDRAFT_AC139526g8v1 [Medicago truncatula] (GB:ABE80139.1) | chr3:6180937-6182599 FORWARD	1131.49	467.768	0.413409	2.41891
Brapa_ESTC029345	AT2G36220	Symbols: | similar to unknown protein [Arabidopsis thaliana] (TAIR:AT3G52710.1); similar to Os11g0153300 [Oryza sativa (japonica cultivar-group)] (GB:NP_001065777.1); similar to calcium/calmodulin protein kinase 1 [Nicotiana tabacum] (GB:AAN71903.1) | chr2:15199635-15200426 FORWARD	1103.84	457.645	0.414594	2.412
Brapa_ESTC015324	AT2G24240	Symbols: | potassium channel tetramerisation domain-containing protein | chr2:10317918-10319243 FORWARD	1148.72	477.341	0.415542	2.4065
Brapa_ESTC008842	AT3G63200	Symbols: PLP9, PLA IIIB | PLA IIIB/PLP9 (Patatin-like protein 9); nutrient reservoir | chr3:23357115-23358354 FORWARD	1179.97	492.184	0.417116	2.39742
Brapa_ESTC025207	AT2G28830	Symbols: | armadillo/beta-catenin repeat family protein / U-box domain-containing protein | chr2:12375465-12377685 REVERSE	1008.94	423.648	0.419894	2.38155
Brapa_ESTC012498	AT5G06870	Symbols: PGIP2 | PGIP2 (POLYGALACTURONASE INHIBITING PROTEIN 2); protein binding | chr5:2133942-2135017 FORWARD	1005.49	429.176	0.426833	2.34284
Brapa_ESTC027364	AT3G13222	Symbols: GIP1 | GIP1 (GBF-INTERACTING PROTEIN 1) | chr3:4251294-4254213 REVERSE	1135.2	486.689	0.428725	2.3325
Brapa_ESTC028941	AT1G18580	Symbols: GAUT11 | GAUT11 (Galacturonosyltransferase 11); polygalacturonate 4-alpha-galacturonosyltransferase | chr1:6396137-6397383 FORWARD	1111.66	476.843	0.428947	2.33129
Brapa_ESTC014289	AT5G65950	| Symbols: | binding | chr5:26397516-26402186 FORWARD	1088.01	467.447	0.429635	2.32756
Brapa_ESTC002659	AT2G01100	Symbols: | similar to CXIP4 (CAX INTERACTING PROTEIN 4), nucleic acid binding / zinc ion binding [Arabidopsis thaliana] (TAIR:AT2G28910.1); similar to hypothetical protein MtrDRAFT_AC144731g21v1 [Medicago truncatula] (GB:ABE92235.1); similar to Os01g0120700 [Oryza sativa (japonica cultivar-group)] (GB:NP_001041870.1) | chr2:82245-82988 FORWARD	1030.74	443.646	0.430415	2.32334
Brapa_ESTC020536	AT2G04550	Symbols: IBR5 | IBR5 (INDOLE-3-BUTYRIC ACID RESPONSE 5); protein tyrosine/serine/threonine phosphatase | chr2:1588535-1589835 FORWARD	1002.25	432.788	0.431816	2.3158
Brapa_ESTC014006	AT3G33520	Symbols: ARP6, SUF3, ESD1, ATARP6 | ATARP6; structural constituent of cytoskeleton | chr3:14104777-14106462 REVERSE	1057.93	457.136	0.432104	2.31426
Brapa_ESTC017149	AT2G41620	Symbols: | nucleoporin interacting component family protein | chr2:17357497-17362075 REVERSE	1126.19	487.006	0.432437	2.31248
Brapa_ESTC027728	AT4G15975	Symbols: | zinc finger (C3HC4-type RING finger) family protein | chr4:9052325-9053032 FORWARD	1061.23	458.932	0.432453	2.31239
Brapa_ESTC020816	AT2G20790	Symbols: | similar to Adaptor complexes medium subunit family protein, expressed [Oryza sativa (japonica cultivar-group)] (GB:ABA99308.2); contains InterPro domain Clathrin adaptor complex, medium chain; (InterPro:IPR001392); contains InterPro domain Mu2 adaptin subunit (AP50) of AP2; (InterPro:IPR008968) | chr2:8957243-8959694 REVERSE	1076.48	470.16	0.436757	2.2896
Brapa_ESTC026817	AT5G63810	Symbols: BGAL10 | BGAL10 (beta-galactosidase 10); beta-galactosidase | chr5:25554468-25558541 FORWARD	1006.33	442.175	0.439394	2.27586
Brapa_ESTC032399	AT5G07890	Symbols: | myosin heavy chain-related | chr5:2517719-2519494 REVERSE	1065.27	468.424	0.439723	2.27416
Brapa_ESTC020003	AT2G05920	Symbols: | subtilase family protein | chr2:2269828-2272204 REVERSE	1121.85	496.58	0.442644	2.25915
Brapa_ESTC014942	AT5G61960	Symbols: AML1 | AML1 (ARABIDOPSIS MEI2-LIKE PROTEIN 1); RNA binding | chr5:24896227-24900709 REVERSE	1007.13	446.602	0.44344	2.2551
Brapa_ESTC032039	AT1G70520	Symbols: | protein kinase family protein | chr1:26588551-26590997 REVERSE	1016.38	454.336	0.447014	2.23707
Brapa_ESTC050539	AT2G14890	Symbols: AGP9 | AGP9 (ARABINOGALACTAN PROTEIN 9) | chr2:6406761-6407837 FORWARD	1042.81	468.148	0.448929	2.22752
Brapa_ESTC002605	AT4G02340	Symbols: | epoxide hydrolase, putative | chr4:1035722-1037403 FORWARD	1086.32	490.902	0.451894	2.21291
Brapa_ESTC021363	AT4G13030	Symbols: | similar to hypothetical protein S250_18C08.34 [Sorghum bicolor] (GB:AAS82599.1); similar to Os05g0274300 [Oryza sativa (japonica cultivar-group)] (GB:NP_001055071.1); contains domain ATP_GTP_A2 (PS50101); contains domain no description (G3D.3.40.50.300); contains domain P-loop containing nucleoside triphosphate hydrolases (SSF52540) | chr4:7607397-7609653 FORWARD	1079.1	488.676	0.452855	2.20821
Brapa_ESTC030686	AT5G15150	Symbols: HAT7, ATHB3, ATHB-3 | ATHB-3 (ARABIDOPSIS THALIANA HOMEOBOX 3); DNA binding / transcription factor | chr5:4913954-4915612 REVERSE	1067.32	486.091	0.455431	2.19572
Brapa_ESTC007905	AT4G17830	Symbols: | peptidase M20/M25/M40 family protein | chr4:9915929-9918062 FORWARD	1022.04	465.633	0.455592	2.19495
Brapa_ESTC025293	AT1G80300	Symbols: | chloroplast ADP, ATP carrier protein 1 / ADP, ATP translocase 1 / adenine nucleotide translocase 1 (AATP1) | chr1:30196846-30199172 FORWARD	1027.22	470.879	0.458401	2.18149
Brapa_ESTC030191	AT4G37730	Symbols: ATBZIP7 | bZIP transcription factor family protein | chr4:17723794-17724711 FORWARD	1021.2	468.491	0.458765	2.17976
Brapa_ESTC002673	AT1G72750	Symbols: ATTIM23-2 | ATTIM23-2 (Arabidopsis thaliana translocase inner membrane subunit 23-2); protein translocase | chr1:27387239-27387805 FORWARD	1064.53	490.525	0.46079	2.17019
Brapa_ESTC016295	AT4G34710	Symbols: SPE2, ADC2 | ADC2 (ARGININE DECARBOXYLASE 2) | chr4:16560320-16562455 REVERSE	1022.26	475.276	0.464927	2.15088
Brapa_ESTC017418	AT2G01720	Symbols: | ribophorin I family protein | chr2:317192-320015 REVERSE	1000.83	466.878	0.466491	2.14366
Brapa_ESTC024732	AT2G41190	Symbols: | amino acid transporter family protein | chr2:17174639-17177223 REVERSE	1059.78	497.33	0.469277	2.13094
Brapa_ESTC011660	AT1G76920	Symbols: | F-box family protein (FBX3) | chr1:28897189-28898313 FORWARD	1055.38	497.828	0.471705	2.11997
Brapa_ESTC001021	AT1G32500	Symbols: ATNAP6 | ATNAP6 (NON-INTRINSIC ABC PROTEIN 6) | chr1:11750071-11751974 REVERSE	1050.12	496.355	0.472665	2.11566
Brapa_ESTC037426	AT1G67680	| Symbols: | binding | chr1:25369625-25372127 REVERSE	1021.57	489.16	0.478832	2.08842
Brapa_ESTC047380	no_hits_f	---------	1000.05	484.503	0.484479	2.06407
Brapa_ESTC032106	AT5G08770	Symbols: | similar to hypothetical protein MtrDRAFT_AC141112g27v1 [Medicago truncatula] (GB:ABE79289.1) | chr5:2855639-2856532 REVERSE	1027.86	498.425	0.484915	2.06222
Brapa_ESTC001312	AT5G27670	| Symbols: | histone H2A, putative | chr5:9792810-9793368 REVERSE	1001.96	493.523	0.492558	2.03022
Brapa_ESTC028657	AT1G73875	Symbols: | endonuclease/exonuclease/phosphatase family protein | chr1:27784773-27788232 FORWARD	1004.37	498.693	0.496523	2.014
