# Supplementary material for: Identification of Yellow Pigmentation Genes in Brassica rapa ssp. pekinensis Using Br300 Microarray
Source: Int J Genomics. 2014 Dec 31;2014:204969. doi: 10.1155/2014/204969 (PMC4297637; doi:10.1155/2014/204969)
Supplement: Supplementary file 1 — In this study, we used Br300K B. rapa microarray and identified three genes as functionally novel genes that involved in yellow color pigmentation. Supplementary figures (Figure S1 to S3) explains the information about plant materials and correlation coefficient of two experimental results. The three identified transcription factor genes are specifically expressed and confirmed their relatedness in yellow pigmentation. Table S1 to S9 supports our results and provides detailed annotation information of some differentially expressed genes. [file 204969.f1.zip › mat.204969.v2/Table S8.xls]

## Sheet: S7
Table S8. Expression profile of transcription factor genes from B. rapa.
SEQ_ID	TAIR7_cds ID	Description, blastN	PI value
			White leaves	Yellow leaves
Brapa_ESTC041049	AT2G21660	Symbols: GR-RBP7, CCR2, ATGRP7 | ATGRP7 (COLD, CIRCADIAN RHYTHM, AND RNA BINDING 2); RNA binding / double-stranded DNA binding / single-stranded DNA binding | chr2:9272557-9273396 REVERSE	57741.3	59728.4
Brapa_ESTC000857	AT1G20696	Symbols: NFD3, NFD03, HMGB3 | HMGB3 (HIGH MOBILITY GROUP B 3); transcription factor | chr1:7179815-7181164 FORWARD	51956.9	55654.4
Brapa_ESTC031372	AT4G40040	| Symbols: | DNA binding | chr4:18557533-18558230 REVERSE	42710.1	53732.7
Brapa_ESTC024010	AT1G18800	Symbols: NRP2 | NRP2 (NAP1-RELATED PROTEIN 2); DNA binding / chromatin binding / histone binding | chr1:6481457-6483454 REVERSE	42439.3	53368.7
Brapa_ESTC019059	AT2G38470	Symbols: ATWRKY33, WRKY33 | WRKY33 (WRKY DNA-binding protein 33); transcription factor | chr2:16115554-16117617 FORWARD	32363.1	52940.3
Brapa_ESTC041022	AT2G18050	Symbols: HIS1-3 | HIS1-3 (HISTONE H1-3); DNA binding | chr2:7853177-7853752 FORWARD	35794.4	49149.9
Brapa_ESTC008254	AT1G20696	Symbols: NFD3, NFD03, HMGB3 | HMGB3 (HIGH MOBILITY GROUP B 3); transcription factor | chr1:7179815-7181164 FORWARD	43749.6	46772.5
Brapa_ESTC036377	AT4G04635	Symbols: | DNA binding / transposase | chr4:2347901-2349154 FORWARD	48150.4	42794.7
Brapa_ESTC009649	AT1G10200	Symbols: | transcription factor LIM, putative | chr1:3346679-3347765 REVERSE	30075.6	42782.8
Brapa_ESTC038316	AT3G62420	Symbols: ATBZIP53 | ATBZIP53 (BASIC REGION/LEUCINE ZIPPER MOTIF 53); DNA binding / sequence-specific DNA binding / transcription factor | chr3:23102820-23103260 REVERSE	43896	42610.7
Brapa_ESTC042458	AT3G02380	Symbols: COL2 | COL2 (CONSTANS-LIKE 2); transcription factor/ zinc ion binding | chr3:487445-488631 REVERSE	11044	42067.7
Brapa_ESTC037027	AT4G37790	Symbols: HAT22 | HAT22 (homeobox-leucine zipper protein 22); transcription factor | chr4:17768235-17769266 FORWARD	31912.9	39720.5
Brapa_ESTC024973	AT1G18800	Symbols: NRP2 | NRP2 (NAP1-RELATED PROTEIN 2); DNA binding / chromatin binding / histone binding | chr1:6481457-6483454 REVERSE	25772.2	38410.9
Brapa_ESTC012109	AT5G28770	Symbols: ATBZIP63, BZO2H3 | BZO2H3 (basic leucine zipper O2 homolog 3); DNA binding / transcription factor | chr5:10796652-10798151 REVERSE	22170.1	37893.9
Brapa_ESTC013696	AT5G28770	Symbols: ATBZIP63, BZO2H3 | BZO2H3 (basic leucine zipper O2 homolog 3); DNA binding / transcription factor | chr5:10796652-10798151 REVERSE	27391.2	37269.1
Brapa_ESTC035785	AT4G04635	Symbols: | DNA binding / transposase | chr4:2347901-2349154 FORWARD	42616.2	36704.1
Brapa_ESTC014969	AT2G31380	Symbols: STH | STH (salt tolerance homologue); transcription factor/ zinc ion binding | chr2:13389227-13390379 FORWARD	11857.2	36350.3
Brapa_ESTC006873	AT4G37790	Symbols: HAT22 | HAT22 (homeobox-leucine zipper protein 22); transcription factor | chr4:17768235-17769266 FORWARD	33486.3	36345.5
Brapa_ESTC006659	AT1G06040	Symbols: STO | STO (SALT TOLERANCE); transcription factor/ zinc ion binding | chr1:1828661-1829658 REVERSE	31793.5	35971.8
Brapa_ESTC050953	AT2G42680	Symbols: MBF1A, ATMBF1A | ATMBF1A/MBF1A (MULTIPROTEIN BRIDGING FACTOR 1A); DNA binding / transcription coactivator | chr2:17782049-17783193 FORWARD	43532.6	35874.5
Brapa_ESTC020965	AT1G54060	| Symbols: | transcription factor | chr1:20184640-20185791 FORWARD	29639.6	35846.1
Brapa_ESTC012242	AT1G51200	Symbols: | DNA binding / zinc ion binding | chr1:18989358-18989879 FORWARD	31265.6	35735.3
Brapa_ESTC013309	AT5G15850	Symbols: COL1 | COL1 (CONSTANS-LIKE 1); transcription factor/ zinc ion binding | chr5:5176300-5177476 REVERSE	28992.7	33829.8
Brapa_ESTC011221	AT1G75240	Symbols: ATHB33 | ATHB33 (ARABIDOPSIS THALIANA HOMEOBOX PROTEIN 33); DNA binding / transcription factor | chr1:28245237-28246166 FORWARD	29838.6	33825.5
Brapa_ESTC020445	AT2G22430	Symbols: ATHB6 | ATHB6 (ARABIDOPSIS THALIANA HOMEOBOX PROTEIN 6); transcription factor | chr2:9533550-9534692 REVERSE	33659.9	33393.7
Brapa_ESTC013702	AT2G46680	Symbols: ATHB7, ATHB-7 | ATHB-7 (ARABIDOPSIS THALIANA HOMEOBOX 7); transcription factor | chr2:19172847-19173843 REVERSE	28692.8	32631.7
Brapa_ESTC032902	AT3G24140	Symbols: FMA | FMA (FAMA); DNA binding / transcription factor/ transcriptional activator | chr3:8715532-8717779 REVERSE	13380	32286.6
Brapa_ESTC021486	AT1G51200	Symbols: | DNA binding / zinc ion binding | chr1:18989358-18989879 FORWARD	28917.8	31944.8
Brapa_ESTC035390	AT3G19290	Symbols: AREB2, ABF4 | ABF4 (ABRE BINDING FACTOR 4); DNA binding / transcription factor/ transcriptional activator | chr3:6687962-6689790 FORWARD	30365.1	31617.1
Brapa_ESTC001539	AT1G18800	Symbols: NRP2 | NRP2 (NAP1-RELATED PROTEIN 2); DNA binding / chromatin binding / histone binding | chr1:6481457-6483454 REVERSE	22515.2	31537.2
Brapa_ESTC005885	AT1G54060	| Symbols: | transcription factor | chr1:20184640-20185791 FORWARD	17220.5	31063.2
Brapa_ESTC021790	AT5G48150	Symbols: PAT1 | PAT1 (PHYTOCHROME A SIGNAL TRANSDUCTION 1); transcription factor | chr5:19539723-19541279 REVERSE	30126.4	30543.9
Brapa_ESTC004579	AT2G22430	Symbols: ATHB6 | ATHB6 (ARABIDOPSIS THALIANA HOMEOBOX PROTEIN 6); transcription factor | chr2:9533550-9534692 REVERSE	25566.9	30475.7
Brapa_ESTC018414	AT3G02380	Symbols: COL2 | COL2 (CONSTANS-LIKE 2); transcription factor/ zinc ion binding | chr3:487445-488631 REVERSE	30916.4	29830.6
Brapa_ESTC002679	AT4G40040	| Symbols: | DNA binding | chr4:18557533-18558230 REVERSE	21296.7	29575.7
Brapa_ESTC017171	AT1G50600	Symbols: SCL5 | SCL5; transcription factor | chr1:18741066-18743215 REVERSE	36304.4	29240.4
Brapa_ESTC041132	AT2G22430	Symbols: ATHB6 | ATHB6 (ARABIDOPSIS THALIANA HOMEOBOX PROTEIN 6); transcription factor | chr2:9533550-9534692 REVERSE	28494.6	28588.5
Brapa_ESTC020072	AT5G15850	Symbols: COL1 | COL1 (CONSTANS-LIKE 1); transcription factor/ zinc ion binding | chr5:5176300-5177476 REVERSE	24898.2	28328.5
Brapa_ESTC002446	AT1G10200	Symbols: | transcription factor LIM, putative | chr1:3346679-3347765 REVERSE	20243.5	28306.8
Brapa_ESTC021137	AT1G10200	Symbols: | transcription factor LIM, putative | chr1:3346679-3347765 REVERSE	20131.2	28218.2
Brapa_ESTC038729	AT1G10200	Symbols: | transcription factor LIM, putative | chr1:3346679-3347765 REVERSE	20342.1	27434.7
Brapa_ESTC005646	AT5G05090	Symbols: | myb family transcription factor | chr5:1503394-1504194 FORWARD	30295.9	27240.9
Brapa_ESTC014320	AT2G22540	Symbols: AGL22, SVP | SVP (SHORT VEGETATIVE PHASE); transcription factor | chr2:9587497-9590683 FORWARD	22800.5	27135.6
Brapa_ESTC025489	AT1G13260	Symbols: RAV1 | RAV1 (Related to ABI3/VP1 1); DNA binding / transcription factor | chr1:4542383-4543417 FORWARD	29750.8	26963.4
Brapa_ESTC000017	AT3G62420	Symbols: ATBZIP53 | ATBZIP53 (BASIC REGION/LEUCINE ZIPPER MOTIF 53); DNA binding / sequence-specific DNA binding / transcription factor | chr3:23102820-23103260 REVERSE	24186.8	26732.7
Brapa_ESTC002594	AT2G31380	Symbols: STH | STH (salt tolerance homologue); transcription factor/ zinc ion binding | chr2:13389227-13390379 FORWARD	5688.65	26422.7
Brapa_ESTC030656	AT1G06040	Symbols: STO | STO (SALT TOLERANCE); transcription factor/ zinc ion binding | chr1:1828661-1829658 REVERSE	25431.5	25933.5
Brapa_ESTC001561	AT1G20693	Symbols: HMG BETA 1, NFD2, NFD02, HMGB2 | HMGB2 (HIGH MOBILITY GROUP B 2); transcription factor | chr1:7177272-7178477 FORWARD	22556.6	25899.6
Brapa_ESTC023060	AT1G10200	Symbols: | transcription factor LIM, putative | chr1:3346679-3347765 REVERSE	16410.7	25383.2
Brapa_ESTC013047	AT3G46600	Symbols: | scarecrow transcription factor family protein | chr3:17169037-17170784 FORWARD	48680.6	25361.7
Brapa_ESTC037025	AT4G37650	Symbols: SGR7, SHR | SHR (SHORT ROOT); transcription factor | chr4:17691865-17693460 FORWARD	15567.4	25267.4
Brapa_ESTC001152	AT2G37630	Symbols: AtPHAN, AS1, AtMYB91, MYB91 | AS1 (ASYMMETRIC LEAVES 1); DNA binding / transcription factor | chr2:15788876-15789979 REVERSE	20832.3	25137.5
Brapa_ESTC044238	AT4G18390	Symbols: | TCP family transcription factor, putative | chr4:10163223-10164320 REVERSE	27532.7	24904.8
Brapa_ESTC021484	AT1G04250	Symbols: IAA17, AXR3 | AXR3 (AUXIN RESISTANT 3); transcription factor | chr1:1136381-1138339 FORWARD	17495	24405.2
Brapa_ESTC009740	AT2G30590	Symbols: WRKY21 | WRKY21 (WRKY DNA-binding protein 21); transcription factor | chr2:13040968-13042380 FORWARD	18059.1	24251
Brapa_ESTC014413	AT1G80840	Symbols: ATWRKY40, WRKY40 | WRKY40 (WRKY DNA-binding protein 40); transcription factor | chr1:30388726-30390248 FORWARD	41646.8	24116.3
Brapa_ESTC012542	AT1G55520	Symbols: ATTBP2 | TBP2 (TATA binding protein 2); DNA binding / RNA polymerase II transcription factor | chr1:20729816-20731149 REVERSE	14863.7	24115.5
Brapa_ESTC013158	AT2G34720	Symbols: | CCAAT-binding transcription factor (CBF-B/NF-YA) family protein | chr2:14657097-14658334 REVERSE	14326.2	23948.8
Brapa_ESTC026408	AT4G35570	Symbols: NFD5, HMGD, NFD05, HMGB5 | HMGB5 (HIGH MOBILITY GROUP B 5); transcription factor | chr4:16887368-16888189 REVERSE	19812.8	23873.7
Brapa_ESTC041116	AT2G22540	Symbols: AGL22, SVP | SVP (SHORT VEGETATIVE PHASE); transcription factor | chr2:9587497-9590683 FORWARD	20513.5	23840
Brapa_ESTC023502	AT5G63790	Symbols: ANAC102 | ANAC102 (Arabidopsis NAC domain containing protein 102); transcription factor | chr5:25544113-25545239 REVERSE	7616.52	23803.3
Brapa_ESTC014907	AT3G28910	Symbols: AtMYB30, MYB30 | MYB30 (myb domain protein 30); DNA binding / transcription factor | chr3:10912680-10914093 FORWARD	13481.5	23636.3
Brapa_ESTC014276	AT4G31720	Symbols: STG1, TAFII15 | TAFII15 (SALT TOLERANCE DURING GERMINATION 1); transcription factor | chr4:15354229-15355710 REVERSE	16743.9	23561.2
Brapa_ESTC023350	AT1G80840	Symbols: ATWRKY40, WRKY40 | WRKY40 (WRKY DNA-binding protein 40); transcription factor | chr1:30388726-30390248 FORWARD	41471.1	23156
Brapa_ESTC040038	AT1G26580	Symbols: | similar to myb family transcription factor / ELM2 domain-containing protein [Arabidopsis thaliana] (TAIR:AT2G03470.1); similar to Os03g0425800 [Oryza sativa (japonica cultivar-group)] (GB:NP_001050406.1); similar to expressed protein [Oryza sativa (japonica cultivar-group)] (GB:AAS07212.1) | chr1:9185607-9187200 FORWARD	616.055	23112.5
Brapa_ESTC022718	AT1G04250	Symbols: IAA17, AXR3 | AXR3 (AUXIN RESISTANT 3); transcription factor | chr1:1136381-1138339 FORWARD	20390.2	22969.4
Brapa_ESTC044775	AT4G31720	Symbols: STG1, TAFII15 | TAFII15 (SALT TOLERANCE DURING GERMINATION 1); transcription factor | chr4:15354229-15355710 REVERSE	20197.6	22893.2
Brapa_ESTC036920	AT4G24540	Symbols: AGL24 | AGL24 (AGAMOUS-LIKE 24); transcription factor | chr4:12671170-12673655 REVERSE	17166.1	22446.5
Brapa_ESTC019065	AT4G24540	Symbols: AGL24 | AGL24 (AGAMOUS-LIKE 24); transcription factor | chr4:12671170-12673655 REVERSE	14298.5	22410.8
Brapa_ESTC020806	AT5G39760	Symbols: ATHB23 | ATHB23 (ARABIDOPSIS THALIANA HOMEOBOX PROTEIN 23); DNA binding / transcription factor | chr5:15928771-15929775 FORWARD	26993.1	22324.2
Brapa_ESTC044364	AT4G22950	Symbols: GL19, AGL19 | AGL19 (AGAMOUS-LIKE 19); transcription factor | chr4:12023957-12027432 REVERSE	11608.1	22315.3
Brapa_ESTC022957	AT3G23030	Symbols: IAA2 | IAA2 (indoleacetic acid-induced protein 2); transcription factor | chr3:8181076-8181692 REVERSE	17772.7	22243.3
Brapa_ESTC027737	AT5G08330	Symbols: | TCP family transcription factor, putative | chr5:2680829-2681548 FORWARD	21203	22035
Brapa_ESTC007364	AT1G17880	Symbols: | nascent polypeptide-associated complex (NAC) domain-containing protein / BTF3b-like transcription factor, putative | chr1:6152565-6153418 REVERSE	15850.2	21882.2
Brapa_ESTC045567	AT5G13330	Symbols: RAP2.6L | RAP2.6L (related to AP2 6L); DNA binding / transcription factor | chr5:4272387-4274464 FORWARD	23598.9	21874.8
Brapa_ESTC010997	AT1G06040	Symbols: STO | STO (SALT TOLERANCE); transcription factor/ zinc ion binding | chr1:1828661-1829658 REVERSE	22552.1	21812.4
Brapa_ESTC014619	AT1G06040	Symbols: STO | STO (SALT TOLERANCE); transcription factor/ zinc ion binding | chr1:1828661-1829658 REVERSE	16750.5	21388.9
Brapa_ESTC037093	AT2G17040	Symbols: ANAC036 | ANAC036 (Arabidopsis NAC domain containing protein 36); transcription factor | chr2:7414205-7415202 FORWARD	10545.1	21336.9
Brapa_ESTC045809	AT5G17810	Symbols: | homeobox-leucine zipper transcription factor family protein | chr5:5880578-5882604 REVERSE	19382.8	21335.5
Brapa_ESTC002965	AT2G37630	Symbols: AtPHAN, AS1, AtMYB91, MYB91 | AS1 (ASYMMETRIC LEAVES 1); DNA binding / transcription factor | chr2:15788876-15789979 REVERSE	11829.8	20988.5
Brapa_ESTC018840	AT3G24120	Symbols: | myb family transcription factor | chr3:8705932-8708155 REVERSE	20846.7	20822.9
Brapa_ESTC044365	AT4G22950	Symbols: GL19, AGL19 | AGL19 (AGAMOUS-LIKE 19); transcription factor | chr4:12023957-12027432 REVERSE	11725.8	20759.2
Brapa_ESTC002874	AT2G17040	Symbols: ANAC036 | ANAC036 (Arabidopsis NAC domain containing protein 36); transcription factor | chr2:7414205-7415202 FORWARD	7940.5	20613.2
Brapa_ESTC019125	AT2G17040	Symbols: ANAC036 | ANAC036 (Arabidopsis NAC domain containing protein 36); transcription factor | chr2:7414205-7415202 FORWARD	13481.3	20568.3
Brapa_ESTC003359	AT1G17880	Symbols: | nascent polypeptide-associated complex (NAC) domain-containing protein / BTF3b-like transcription factor, putative | chr1:6152565-6153418 REVERSE	13076.7	20445.4
Brapa_ESTC018066	AT4G18390	Symbols: | TCP family transcription factor, putative | chr4:10163223-10164320 REVERSE	14184.2	20412
Brapa_ESTC010101	AT3G16770	Symbols: RAP2.3, ATEBP | ATEBP/RAP2.3 (RELATED TO AP2 3); DNA binding / protein binding / transcription factor/ transcriptional activator | chr3:5705790-5706774 FORWARD	23357.6	20404.1
Brapa_ESTC018766	AT3G13810	Symbols: ATIDD11 | ATIDD11 (ARABIDOPSIS THALIANA INDETERMINATE(ID)-DOMAIN 11); nucleic acid binding / transcription factor/ zinc ion binding | chr3:4544948-4547307 FORWARD	23336.8	20317.9
Brapa_ESTC012340	AT2G42680	Symbols: MBF1A, ATMBF1A | ATMBF1A/MBF1A (MULTIPROTEIN BRIDGING FACTOR 1A); DNA binding / transcription coactivator | chr2:17782049-17783193 FORWARD	13855.6	20019.3
Brapa_ESTC041546	AT2G30420	Symbols: | myb family transcription factor | chr2:12968014-12968992 REVERSE	5656.52	19863.1
Brapa_ESTC021596	AT2G38470	Symbols: ATWRKY33, WRKY33 | WRKY33 (WRKY DNA-binding protein 33); transcription factor | chr2:16115554-16117617 FORWARD	6651.61	19835.8
Brapa_ESTC015713	AT2G24500	Symbols: FZF | FZF; transcription factor | chr2:10408339-10409885 REVERSE	26535.1	19695.6
Brapa_ESTC009185	AT1G13260	Symbols: RAV1 | RAV1 (Related to ABI3/VP1 1); DNA binding / transcription factor | chr1:4542383-4543417 FORWARD	17027.9	19485.7
Brapa_ESTC016418	AT5G18680	Symbols: AtTLP11 | AtTLP11 (TUBBY LIKE PROTEIN 11); phosphoric diester hydrolase/ transcription factor | chr5:6228360-6230428 REVERSE	26845.3	19316.4
Brapa_ESTC042258	AT2G03070	Symbols: | similar to NPH4 (NON-PHOTOTROPHIC HYPOCOTYL), transcription factor [Arabidopsis thaliana] (TAIR:AT5G20730.3); similar to hypothetical protein Os03g31010 [Oryza sativa (japonica cultivar-group)] (GB:AAP20836.1) | chr2:905977-908791 FORWARD	18059.7	19314.7
Brapa_ESTC030441	AT3G58680	Symbols: MBF1B, ATMBF1B | ATMBF1B/MBF1B (MULTIPROTEIN BRIDGING FACTOR 1B); DNA binding / transcription coactivator | chr3:21718344-21719602 FORWARD	22684.6	19276.1
Brapa_ESTC014282	AT2G42680	Symbols: MBF1A, ATMBF1A | ATMBF1A/MBF1A (MULTIPROTEIN BRIDGING FACTOR 1A); DNA binding / transcription coactivator | chr2:17782049-17783193 FORWARD	17866	19167.9
Brapa_ESTC029647	AT4G37790	Symbols: HAT22 | HAT22 (homeobox-leucine zipper protein 22); transcription factor | chr4:17768235-17769266 FORWARD	16697.1	19157.8
Brapa_ESTC022687	AT1G07980	Symbols: | histone-like transcription factor (CBF/NF-Y) family protein | chr1:2473520-2474907 REVERSE	11760.5	18957.3
Brapa_ESTC023894	AT2G30590	Symbols: WRKY21 | WRKY21 (WRKY DNA-binding protein 21); transcription factor | chr2:13040968-13042380 FORWARD	21428.4	18833.7
Brapa_ESTC021276	AT1G78080	Symbols: RAP2.4 | RAP2.4 (related to AP2 4); DNA binding / transcription factor | chr1:29369683-29370687 FORWARD	42555.4	18821.5
Brapa_ESTC030337	AT3G20770	Symbols: EIN3 | EIN3 (ETHYLENE-INSENSITIVE3); transcription factor | chr3:7260708-7262594 REVERSE	24960.1	18724.3
Brapa_ESTC026347	AT1G14410	Symbols: ATWHY1, PTAC1 | ATWHY1/PTAC1 (A. THALIANA WHIRLY 1, PLASTID TRANSCRIPTIONALLY ACTIVE1); DNA binding | chr1:4929347-4930805 REVERSE	5605.48	18432
Brapa_ESTC011920	AT1G69490	Symbols: ANAC029, ATNAP, NAP | NAP (NAC-LIKE, ACTIVATED BY AP3/PI); transcription factor | chr1:26125896-26126885 FORWARD	12680.6	18325.8
Brapa_ESTC008873	AT3G23050	Symbols: AXR2, IAA7 | IAA7 (AUXIN RESISTANT 2); transcription factor | chr3:8194775-8196723 FORWARD	18437.7	18076.8
Brapa_ESTC041123	AT1G57820	Symbols: VIM1 | VIM1 (VARIANT IN METHYLATION 1); DNA binding | chr1:21418007-21421567 REVERSE	18725.2	18041.2
Brapa_ESTC043297	AT3G23030	Symbols: IAA2 | IAA2 (indoleacetic acid-induced protein 2); transcription factor | chr3:8181076-8181692 REVERSE	17056.2	17771.1
Brapa_ESTC032993	AT5G60410	Symbols: ATSIZ1, SIZ1 | ATSIZ1/SIZ1; DNA binding | chr5:24312452-24318056 FORWARD	19773	17751.3
Brapa_ESTC004857	AT1G20696	Symbols: NFD3, NFD03, HMGB3 | HMGB3 (HIGH MOBILITY GROUP B 3); transcription factor | chr1:7179815-7181164 FORWARD	18112.4	17746.3
Brapa_ESTC046861	AT5G52660	Symbols: | myb family transcription factor | chr5:21376649-21379263 REVERSE	20224.5	17591.8
Brapa_ESTC046505	AT5G63790	Symbols: ANAC102 | ANAC102 (Arabidopsis NAC domain containing protein 102); transcription factor | chr5:25544113-25545239 REVERSE	2862.25	17575.6
Brapa_ESTC020819	AT4G11060	Symbols: MTSSB | MTSSB (MITOCHONDRIALLY TARGETED SINGLE-STRANDED DNA binding PROTEIN); single-stranded DNA binding | chr4:6754816-6756226 REVERSE	18128.9	17286.8
Brapa_ESTC024370	AT5G49450	Symbols: ATBZIP1 | bZIP family transcription factor | chr5:20069371-20069808 FORWARD	16957.9	17025.6
Brapa_ESTC016479	AT5G24800	Symbols: ATBZIP9, BZO2H2 | BZO2H2 (basic leucine zipper O2 homolog 2); DNA binding / transcription factor | chr5:8515262-8516544 FORWARD	10110.9	17005
Brapa_ESTC032134	AT5G12400	Symbols: | PHD finger transcription factor, putative | chr5:4013814-4020910 FORWARD	14840.6	16432.5
Brapa_ESTC011589	AT3G46640	Symbols: LUX, PCL1 | PCL1 (PHYTOCLOCK 1); DNA binding | chr3:17194233-17195204 FORWARD	27014.7	16430.9
Brapa_ESTC010228	AT5G23710	Symbols: | DNA binding / DNA-directed RNA polymerase | chr5:7996531-7997223 REVERSE	12673.7	16391.3
Brapa_ESTC035162	AT4G31920	Symbols: ARR10 | ARR10 (ARABIDOPSIS RESPONSE REGULATOR 10); transcription factor/ two-component response regulator | chr4:15444296-15446772 REVERSE	14609	16372.9
Brapa_ESTC018998	AT4G22950	Symbols: GL19, AGL19 | AGL19 (AGAMOUS-LIKE 19); transcription factor | chr4:12023957-12027432 REVERSE	8780.13	16108.8
Brapa_ESTC043261	AT3G24120	Symbols: | myb family transcription factor | chr3:8705932-8708155 REVERSE	14270.2	15864.7
Brapa_ESTC038551	AT1G07480	Symbols: | transcription factor IIA large subunit / TFIIA large subunit (TFIIA-L) | chr1:2296703-2299212 REVERSE	20033.3	15727.5
Brapa_ESTC010789	AT2G22430	Symbols: ATHB6 | ATHB6 (ARABIDOPSIS THALIANA HOMEOBOX PROTEIN 6); transcription factor | chr2:9533550-9534692 REVERSE	16468.3	15616.6
Brapa_ESTC014571	AT5G02840	Symbols: | DNA binding / transcription factor | chr5:648792-651202 FORWARD	9021.77	15602.6
Brapa_ESTC041016	AT2G18160	Symbols: ATBZIP2, GBF5 | GBF5 (G-box binding factor 5); DNA binding / transcription factor | chr2:7905370-7905885 REVERSE	14474.2	15567.5
Brapa_ESTC036276	AT3G15790	Symbols: MBD11 | MBD11 (methyl-CpG-binding domain 11); DNA binding | chr3:5343216-5344393 FORWARD	8738.8	15545.2
Brapa_ESTC042862	AT3G12810	Symbols: SRCAP, CHR13, PIE1 | PIE1 (PHOTOPERIOD-INDEPENDENT EARLY FLOWERING 1); ATP binding / DNA binding / helicase | chr3:4065643-4073999 FORWARD	14951.5	15532.8
Brapa_ESTC022794	AT4G14540	Symbols: | CCAAT-box binding transcription factor subunit B (NF-YB) (HAP3 ) (AHAP3) family | chr4:8344659-8345144 FORWARD	10696.6	15520.3
Brapa_ESTC036279	AT4G14540	Symbols: | CCAAT-box binding transcription factor subunit B (NF-YB) (HAP3 ) (AHAP3) family | chr4:8344659-8345144 FORWARD	10883.1	15494.3
Brapa_ESTC039377	AT1G08465	Symbols: YAB2 | YAB2 (YABBY 2); transcription factor | chr1:2676030-2679385 FORWARD	13375.3	15486.1
Brapa_ESTC036539	AT3G15210	Symbols: ATERF-4, ERF4, RAP2.5, ATERF4 | ATERF-4/ATERF4/ERF4/RAP2.5 (ETHYLENE RESPONSIVE ELEMENT BINDING FACTOR 4); DNA binding / protein binding / transcription factor/ transcriptional repressor | chr3:5121479-5122147 FORWARD	14546.6	15411.7
Brapa_ESTC013148	AT5G23280	Symbols: | TCP family transcription factor, putative | chr5:7843020-7843772 FORWARD	16767.3	15384.8
Brapa_ESTC021705	AT4G17050	| Symbols: | transcription factor | chr4:9589681-9592432 FORWARD	2545.22	15341.1
Brapa_ESTC030931	AT1G51950	Symbols: IAA18 | IAA18 (indoleacetic acid-induced protein 18); transcription factor | chr1:19309339-19310799 FORWARD	17624.5	15307
Brapa_ESTC028464	AT4G16845	Symbols: VRN2 | VRN2 (REDUCED VERNALIZATION RESPONSE 2); transcription factor | chr4:9476727-9479744 FORWARD	6646.84	15163.3
Brapa_ESTC015465	AT2G37630	Symbols: AtPHAN, AS1, AtMYB91, MYB91 | AS1 (ASYMMETRIC LEAVES 1); DNA binding / transcription factor | chr2:15788876-15789979 REVERSE	9436.28	14939.9
Brapa_ESTC010946	AT2G22430	Symbols: ATHB6 | ATHB6 (ARABIDOPSIS THALIANA HOMEOBOX PROTEIN 6); transcription factor | chr2:9533550-9534692 REVERSE	17292.2	14920.2
Brapa_ESTC036400	AT4G30180	Symbols: | transcription factor/ transcription regulator | chr4:14769034-14769510 FORWARD	1708.4	14868.2
Brapa_ESTC029856	AT3G27010	Symbols: PCF1, AT-TCP20 | AT-TCP20 ("Arabidopsis thaliana teosinte branched 1, cycloidea, PCF (TCP)-domain family protein 20"); transcription factor | chr3:9959047-9959991 REVERSE	10445.6	14827.8
Brapa_ESTC013742	AT5G49450	Symbols: ATBZIP1 | bZIP family transcription factor | chr5:20069371-20069808 FORWARD	4208.16	14823.3
Brapa_ESTC026941	AT1G51950	Symbols: IAA18 | IAA18 (indoleacetic acid-induced protein 18); transcription factor | chr1:19309339-19310799 FORWARD	12106.1	14771.4
Brapa_ESTC041383	AT2G31380	Symbols: STH | STH (salt tolerance homologue); transcription factor/ zinc ion binding | chr2:13389227-13390379 FORWARD	3548.87	14725.2
Brapa_ESTC006772	AT2G17040	Symbols: ANAC036 | ANAC036 (Arabidopsis NAC domain containing protein 36); transcription factor | chr2:7414205-7415202 FORWARD	15366.3	14607.5
Brapa_ESTC028962	AT5G62470	Symbols: mybcov1, AtMYB96, MYB96 | MYB96 (myb domain protein 96); DNA binding / transcription factor | chr5:25096660-25098084 REVERSE	10595.1	14525.9
Brapa_ESTC033691	AT5G44080	Symbols: | bZIP transcription factor family protein | chr5:17756014-17756961 REVERSE	11914.2	14473.9
Brapa_ESTC011674	AT1G69010	Symbols: BIM2 | BIM2 (BES1-INTERACTING MYC-LIKE PROTEIN 2); DNA binding / transcription factor | chr1:25945467-25947262 FORWARD	10514.5	14344.4
Brapa_ESTC031565	AT1G28370	Symbols: ERF11, ATERF11 | ATERF11/ERF11 (ERF domain protein 11); DNA binding / transcription factor/ transcriptional repressor | chr1:9956337-9956837 REVERSE	13714.3	14195.4
Brapa_ESTC025203	AT4G31800	Symbols: WRKY18 | WRKY18 (WRKY DNA-binding protein 18); transcription factor | chr4:15383302-15384818 FORWARD	10202.1	14040.3
Brapa_ESTC021464	AT5G28770	Symbols: ATBZIP63, BZO2H3 | BZO2H3 (basic leucine zipper O2 homolog 3); DNA binding / transcription factor | chr5:10796652-10798151 REVERSE	10034	14004.7
Brapa_ESTC010994	AT5G08330	Symbols: | TCP family transcription factor, putative | chr5:2680829-2681548 FORWARD	12898.8	13993.4
Brapa_ESTC039758	AT1G19700	Symbols: BEL10 | BEL10 (BEL1-LIKE HOMEODOMAIN 10); DNA binding / transcription factor | chr1:6809949-6811845 REVERSE	20100.4	13925.2
Brapa_ESTC021906	AT3G02990	Symbols: HSFA1E, ATHSFA1E | ATHSFA1E (Arabidopsis thaliana heat shock transcription factor A1E); DNA binding / transcription factor | chr3:673621-675995 FORWARD	13694	13880.8
Brapa_ESTC023404	AT4G40040	| Symbols: | DNA binding | chr4:18557533-18558230 REVERSE	12288.3	13772.4
Brapa_ESTC011161	AT5G45420	Symbols: | myb family transcription factor | chr5:18422895-18423824 REVERSE	8582.74	13715.5
Brapa_ESTC031149	AT3G15210	Symbols: ATERF-4, ERF4, RAP2.5, ATERF4 | ATERF-4/ATERF4/ERF4/RAP2.5 (ETHYLENE RESPONSIVE ELEMENT BINDING FACTOR 4); DNA binding / protein binding / transcription factor/ transcriptional repressor | chr3:5121479-5122147 FORWARD	24285.2	13690.2
Brapa_ESTC028442	AT3G47620	Symbols: | TCP family transcription factor, putative | chr3:17569989-17571458 FORWARD	16943.1	13655.2
Brapa_ESTC012503	AT1G54060	| Symbols: | transcription factor | chr1:20184640-20185791 FORWARD	5494.6	13501.6
Brapa_ESTC007848	AT5G08330	Symbols: | TCP family transcription factor, putative | chr5:2680829-2681548 FORWARD	11927.6	13426.7
Brapa_ESTC029980	AT5G24590	Symbols: ANAC091, TIP | TIP (TCV-INTERACTING PROTEIN); transcription factor | chr5:8416923-8418726 REVERSE	17340.3	13420.7
Brapa_ESTC016261	AT1G16970	Symbols: KU70, ATKU70 | ATKU70/KU70 (Arabidopsis thaliana Ku70 homolog); double-stranded DNA binding / protein binding | chr1:5801152-5805717 REVERSE	10008.1	13291.9
Brapa_ESTC007453	AT2G33310	Symbols: IAA13 | IAA13 (indoleacetic acid-induced protein 13); transcription factor | chr2:14121646-14122834 REVERSE	11499.7	13289.8
Brapa_ESTC013548	AT1G15340	Symbols: MBD10 | MBD10 (methyl-CpG-binding domain 10); DNA binding | chr1:5275890-5277469 REVERSE	7027.16	13275.6
Brapa_ESTC041562	AT2G30590	Symbols: WRKY21 | WRKY21 (WRKY DNA-binding protein 21); transcription factor | chr2:13040968-13042380 FORWARD	16325.1	13105.8
Brapa_ESTC039319	AT1G04240	Symbols: IAA3, SHY2 | SHY2 (SHORT HYPOCOTYL 2); transcription factor | chr1:1128563-1129318 REVERSE	12309.3	13000
Brapa_ESTC005669	AT3G58680	Symbols: MBF1B, ATMBF1B | ATMBF1B/MBF1B (MULTIPROTEIN BRIDGING FACTOR 1B); DNA binding / transcription coactivator | chr3:21718344-21719602 FORWARD	27156.3	12996.5
Brapa_ESTC034801	AT2G45660	Symbols: SOC1, AGL20 | AGL20 (AGAMOUS-LIKE 20); transcription factor | chr2:18814873-18817267 REVERSE	12431.9	12923.8
Brapa_ESTC024398	AT5G07100	Symbols: WRKY26 | WRKY26 (WRKY DNA-binding protein 26); transcription factor | chr5:2204814-2205648 FORWARD	5261.48	12921.8
Brapa_ESTC030286	AT2G01940	Symbols: SGR5, ATIDD15 | SGR5 (SHOOT GRAVITROPISM 5); nucleic acid binding / transcription factor/ zinc ion binding | chr2:432651-434916 FORWARD	9973.99	12900.1
Brapa_ESTC021797	AT5G17300	Symbols: | myb family transcription factor | chr5:5690437-5692437 REVERSE	10634.7	12871.8
Brapa_ESTC015785	AT2G15430	Symbols: RPB35.5A, RBP36A | RBP36A (RNA polymerase II 36 kDa polypeptide A); DNA binding / DNA-directed RNA polymerase | chr2:6740743-6742564 FORWARD	24970.3	12766.4
Brapa_ESTC004512	AT3G19290	Symbols: AREB2, ABF4 | ABF4 (ABRE BINDING FACTOR 4); DNA binding / transcription factor/ transcriptional activator | chr3:6687962-6689790 FORWARD	14158.9	12708.1
Brapa_ESTC010487	AT4G26110	Symbols: NAP1;1 | NAP1;1 (NUCLEOSOME ASSEMBLY PROTEIN1;1); DNA binding | chr4:13232721-13235511 FORWARD	11083.7	12707.8
Brapa_ESTC011749	AT1G69490	Symbols: ANAC029, ATNAP, NAP | NAP (NAC-LIKE, ACTIVATED BY AP3/PI); transcription factor | chr1:26125896-26126885 FORWARD	7597.77	12623.3
Brapa_ESTC030188	AT4G37650	Symbols: SGR7, SHR | SHR (SHORT ROOT); transcription factor | chr4:17691865-17693460 FORWARD	6080.32	12510.4
Brapa_ESTC043103	AT4G14540	Symbols: | CCAAT-box binding transcription factor subunit B (NF-YB) (HAP3 ) (AHAP3) family | chr4:8344659-8345144 FORWARD	9246.42	12478.6
Brapa_ESTC017250	AT1G69580	| Symbols: | transcription factor | chr1:26175790-26177275 FORWARD	10176.9	12454.6
Brapa_ESTC022325	AT1G54060	| Symbols: | transcription factor | chr1:20184640-20185791 FORWARD	5952.92	12443.6
Brapa_ESTC033093	AT4G10710	Symbols: SPT16 | SPT16 (GLOBAL transcription factor C); metalloexopeptidase | chr4:6602222-6605446 REVERSE	12253.2	12410.3
Brapa_ESTC016994	AT1G17880	Symbols: | nascent polypeptide-associated complex (NAC) domain-containing protein / BTF3b-like transcription factor, putative | chr1:6152565-6153418 REVERSE	9195.06	12317.5
Brapa_ESTC018769	AT1G54060	| Symbols: | transcription factor | chr1:20184640-20185791 FORWARD	7061.54	12290.3
Brapa_ESTC040751	AT1G75250	Symbols: | myb family transcription factor | chr1:28248124-28249114 REVERSE	2426.15	12248.5
Brapa_ESTC001423	AT5G48150	Symbols: PAT1 | PAT1 (PHYTOCHROME A SIGNAL TRANSDUCTION 1); transcription factor | chr5:19539723-19541279 REVERSE	10806	12224.3
Brapa_ESTC046206	AT5G47640	Symbols: | CCAAT-box binding transcription factor subunit B (NF-YB) (HAP3 ) (AHAP3) family (Hap3b) | chr5:19326640-19327212 FORWARD	8843.3	12187.1
Brapa_ESTC049547	AT2G37550	Symbols: AGD7, ASP1 | ASP1 (PDE1 SUPPRESSOR 1); DNA binding | chr2:15762622-15764534 REVERSE	16880.7	12165
Brapa_ESTC027059	AT1G58025	| Symbols: | DNA binding | chr1:21461884-21465422 REVERSE	13427.3	12058.6
Brapa_ESTC034584	AT1G65440	Symbols: GTB1 | GTB1 (GLOBAL transcription factor GROUP B1); RNA binding / hydrolase, acting on ester bonds | chr1:24310571-24317990 REVERSE	9930.86	12046.1
Brapa_ESTC042561	AT3G04670	Symbols: ATWRKY39, WRKY39 | WRKY39 (WRKY DNA-binding protein 39); transcription factor | chr3:1266536-1267697 REVERSE	10467.9	11959.4
Brapa_ESTC017861	AT1G69780	Symbols: ATHB13 | ATHB13 (ARABIDOPSIS THALIANA HOMEOBOX PROTEIN 12); DNA binding / transcription factor | chr1:26262829-26264128 FORWARD	16549.4	11862
Brapa_ESTC010382	AT5G47370	Symbols: HAT2 | HAT2; transcription factor | chr5:19233709-19234874 REVERSE	8581.62	11751.2
Brapa_ESTC044712	AT4G31800	Symbols: WRKY18 | WRKY18 (WRKY DNA-binding protein 18); transcription factor | chr4:15383302-15384818 FORWARD	8524.31	11748
Brapa_ESTC034918	AT1G74840	Symbols: | myb family transcription factor | chr1:28119862-28120978 REVERSE	15600.7	11683.9
Brapa_ESTC012302	AT4G35040	Symbols: | bZIP transcription factor family protein | chr4:16680826-16681810 FORWARD	11717.2	11590.1
Brapa_ESTC043283	AT3G24050	Symbols: | GATA transcription factor 1 (GATA-1) | chr3:8686067-8687469 FORWARD	15243.9	11582.1
Brapa_ESTC018989	AT2G45660	Symbols: SOC1, AGL20 | AGL20 (AGAMOUS-LIKE 20); transcription factor | chr2:18814873-18817267 REVERSE	15781.5	11564
Brapa_ESTC027016	AT2G45160	Symbols: | scarecrow transcription factor family protein | chr2:18625185-18627107 REVERSE	6178.24	11449.8
Brapa_ESTC042892	AT3G12560	Symbols: ATTBP2, TRFL9 | TRFL9 (TRF-LIKE 9); DNA binding | chr3:3982279-3984855 REVERSE	5854.38	11443.3
Brapa_ESTC023951	AT5G61420	Symbols: AtMYB28, MYB28 | MYB28 (myb domain protein 28); DNA binding / transcription factor | chr5:24706701-24708021 REVERSE	10011.8	11440.5
Brapa_ESTC033816	AT4G24660	Symbols: ATHB22, MEE68 | ATHB22/MEE68 (ARABIDOPSIS THALIANA HOMEOBOX PROTEIN 22, maternal effect embryo arrest 68); DNA binding / transcription factor | chr4:12724861-12725523 REVERSE	2580.12	11424.3
Brapa_ESTC022641	AT2G31380	Symbols: STH | STH (salt tolerance homologue); transcription factor/ zinc ion binding | chr2:13389227-13390379 FORWARD	6474.8	11321.9
Brapa_ESTC032376	AT5G08330	Symbols: | TCP family transcription factor, putative | chr5:2680829-2681548 FORWARD	12051	11316.9
Brapa_ESTC015822	AT2G41630	Symbols: TFIIB | TFIIB (transcription factor II B); RNA polymerase II transcription factor | chr2:17362633-17364478 REVERSE	12597.7	11296.9
Brapa_ESTC009401	AT3G21175	Symbols: ZML1 | ZML1 (ZIM-LIKE 1); transcription factor | chr3:7422838-7424604 FORWARD	5848.56	11278.6
Brapa_ESTC005443	AT5G25220	Symbols: KNAT3 | KNAT3 (KNOTTED1-LIKE HOMEOBOX GENE 3); transcription factor | chr5:8736211-8738118 FORWARD	10398.8	11233.5
Brapa_ESTC001635	AT4G24540	Symbols: AGL24 | AGL24 (AGAMOUS-LIKE 24); transcription factor | chr4:12671170-12673655 REVERSE	6978.8	11195.6
Brapa_ESTC023877	AT5G18680	Symbols: AtTLP11 | AtTLP11 (TUBBY LIKE PROTEIN 11); phosphoric diester hydrolase/ transcription factor | chr5:6228360-6230428 REVERSE	16319.8	11135.8
Brapa_ESTC002956	AT1G52890	Symbols: ANAC019 | ANAC019 (Arabidopsis NAC domain containing protein 19); transcription factor | chr1:19700960-19702112 REVERSE	17582.1	10975
Brapa_ESTC010245	AT3G62420	Symbols: ATBZIP53 | ATBZIP53 (BASIC REGION/LEUCINE ZIPPER MOTIF 53); DNA binding / sequence-specific DNA binding / transcription factor | chr3:23102820-23103260 REVERSE	9940.36	10909.9
Brapa_ESTC036073	AT3G10480	Symbols: ANAC050 | ANAC050; transcription factor | chr3:3264415-3266786 FORWARD	24387.4	10893.8
Brapa_ESTC039874	AT1G20980	Symbols: FBR6, SPL1R2, ATSPL14, SPL14 | SPL14 (SQUAMOSA PROMOTER BINDING PROTEIN-LIKE 14); DNA binding / transcription factor | chr1:7325031-7328922 FORWARD	19004.3	10886.9
Brapa_ESTC030668	AT5G14960	Symbols: DEL2, E2L1, E2FD | DEL2/E2FD/E2L1 (DP-E2F-LIKE 2); DNA binding / transcription factor | chr5:4843969-4846376 FORWARD	1429.33	10830.8
Brapa_ESTC011717	AT1G51950	Symbols: IAA18 | IAA18 (indoleacetic acid-induced protein 18); transcription factor | chr1:19309339-19310799 FORWARD	14514.5	10828.5
Brapa_ESTC017129	AT5G60910	Symbols: FUL, AGL8 | AGL8 (AGAMOUS-LIKE 8); transcription factor | chr5:24519962-24523239 REVERSE	6569.08	10734.8
Brapa_ESTC042984	AT3G11100	| Symbols: | transcription factor | chr3:3476496-3477326 REVERSE	10468.5	10635.7
Brapa_ESTC017709	AT5G62430	Symbols: CDF1 | CDF1 (CYCLING DOF FACTOR 1); DNA binding / protein binding / transcription factor | chr5:25086524-25088013 REVERSE	3447.8	10587.8
Brapa_ESTC009464	AT1G25560	Symbols: | AP2 domain-containing transcription factor, putative | chr1:8981878-8982963 REVERSE	8112.14	10584.7
Brapa_ESTC043552	AT3G51910	Symbols: HSFA7A, AT-HSFA7A | AT-HSFA7A (Arabidopsis thaliana heat shock transcription factor A7A); DNA binding / transcription factor | chr3:19276272-19277597 FORWARD	11283	10549.5
Brapa_ESTC014075	AT5G24590	Symbols: ANAC091, TIP | TIP (TCV-INTERACTING PROTEIN); transcription factor | chr5:8416923-8418726 REVERSE	22360.8	10526.9
Brapa_ESTC027629	AT1G43860	| Symbols: | transcription factor | chr1:16624684-16626825 REVERSE	11567.6	10501.1
Brapa_ESTC007693	AT1G64860	Symbols: SIG1, SIG2, SIGB, RPOD1, SIGA | SIGA (SIGMA FACTOR A); DNA binding / DNA-directed RNA polymerase/ transcription factor | chr1:24102160-24104409 FORWARD	3550.79	10443.1
Brapa_ESTC018918	AT5G61420	Symbols: AtMYB28, MYB28 | MYB28 (myb domain protein 28); DNA binding / transcription factor | chr5:24706701-24708021 REVERSE	9475.94	10419.5
Brapa_ESTC043207	AT3G21270	Symbols: ADOF2 | ADOF2 (Arabidopsis dof zinc finger protein 2); DNA binding / transcription factor | chr3:7474940-7475554 FORWARD	5929.11	10413.3
Brapa_ESTC030707	AT2G43060	| Symbols: | transcription factor | chr2:17916324-17916794 FORWARD	11107.2	10411.2
Brapa_ESTC012504	AT3G14230	Symbols: RAP2.2 | RAP2.2; DNA binding / transcription factor | chr3:4737623-4739007 REVERSE	13573.8	10393.1
Brapa_ESTC019603	AT1G04240	Symbols: IAA3, SHY2 | SHY2 (SHORT HYPOCOTYL 2); transcription factor | chr1:1128563-1129318 REVERSE	11626.5	10372.4
Brapa_ESTC020604	AT3G24490	| Symbols: | transcription factor | chr3:8911029-8912030 FORWARD	7645.69	10348.1
Brapa_ESTC005609	AT1G27000	Symbols: | bZIP family transcription factor | chr1:9374055-9376409 FORWARD	10658.6	10326.4
Brapa_ESTC013693	AT4G01280	Symbols: | DNA binding / transcription factor | chr4:535288-536854 FORWARD	8537.03	10283.2
Brapa_ESTC049857	AT5G07690	Symbols: AtMYB29, MYB29 | MYB29 (myb domain protein 29); DNA binding / transcription factor | chr5:2447091-2448286 FORWARD	7817.31	10187.2
Brapa_ESTC033733	AT2G16390	Symbols: CHR35, DRD1 | DRD1 (DEFECTIVE IN RNA-DIRECTED DNA METHYLATION 1); ATP binding / DNA binding / helicase/ nucleic acid binding | chr2:7104720-7108178 FORWARD	4477.73	10170.6
Brapa_ESTC011248	AT3G14180	| Symbols: | transcription factor | chr3:4707297-4708628 REVERSE	5965.64	10167.9
Brapa_ESTC010605	AT1G55520	Symbols: ATTBP2 | TBP2 (TATA binding protein 2); DNA binding / RNA polymerase II transcription factor | chr1:20729816-20731149 REVERSE	6886.3	10150.3
Brapa_ESTC028815	AT1G06040	Symbols: STO | STO (SALT TOLERANCE); transcription factor/ zinc ion binding | chr1:1828661-1829658 REVERSE	11402.3	10124.5
Brapa_ESTC019044	AT2G45660	Symbols: SOC1, AGL20 | AGL20 (AGAMOUS-LIKE 20); transcription factor | chr2:18814873-18817267 REVERSE	11313.2	10077.1
Brapa_ESTC040015	AT1G25580	Symbols: ANAC008 | ANAC008 (Arabidopsis NAC domain containing protein 8); transcription factor | chr1:8997051-8999587 REVERSE	2639.03	10023.5
Brapa_ESTC012527	AT3G09250	| Symbols: | DNA binding / nuclease | chr3:2839086-2840300 FORWARD	5006.87	9985.88
Brapa_ESTC012149	AT1G04100	Symbols: IAA10 | IAA10 (indoleacetic acid-induced protein 10); transcription factor | chr1:1059808-1061025 FORWARD	9752.77	9946.17
Brapa_ESTC012441	AT2G46870	Symbols: NGA1 | NGA1 (NGATHA1); transcription factor | chr2:19268382-19269314 FORWARD	6994.87	9942.44
Brapa_ESTC014896	AT2G18160	Symbols: ATBZIP2, GBF5 | GBF5 (G-box binding factor 5); DNA binding / transcription factor | chr2:7905370-7905885 REVERSE	8156.3	9931.83
Brapa_ESTC013139	AT5G51190	Symbols: | AP2 domain-containing transcription factor, putative | chr5:20817934-20818599 REVERSE	10766.1	9919.47
Brapa_ESTC000084	AT4G36730	Symbols: GBF1 | GBF1 (G-box binding factor 1); transcription factor | chr4:17309854-17311756 REVERSE	13580.3	9854.45
Brapa_ESTC046087	AT5G45420	Symbols: | myb family transcription factor | chr5:18422895-18423824 REVERSE	4235.58	9804.8
Brapa_ESTC024886	AT3G23050	Symbols: AXR2, IAA7 | IAA7 (AUXIN RESISTANT 2); transcription factor | chr3:8194775-8196723 FORWARD	9202.33	9797.89
Brapa_ESTC032724	AT1G19000	Symbols: | myb family transcription factor | chr1:6561326-6562675 REVERSE	8358.19	9762.99
Brapa_ESTC045594	AT5G12840	Symbols: EMB2220, HAP2, ATHAP2A | HAP2A (EMBRYO DEFECTIVE 2220); transcription factor | chr5:4051150-4052964 REVERSE	5020.02	9757.9
Brapa_ESTC045046	AT4G34000	Symbols: ABF3, DPBF5 | ABF3/DPBF5 (ABSCISIC ACID RESPONSIVE ELEMENTS-BINDING FACTOR 3); DNA binding / protein binding / transcription factor/ transcriptional activator | chr4:16296013-16297976 FORWARD	8618.61	9716.04
Brapa_ESTC016167	AT3G02990	Symbols: HSFA1E, ATHSFA1E | ATHSFA1E (Arabidopsis thaliana heat shock transcription factor A1E); DNA binding / transcription factor | chr3:673621-675995 FORWARD	6069.82	9645.95
Brapa_ESTC014377	AT5G46910	Symbols: | transcription factor jumonji (jmj) family protein | chr5:19065007-19068107 FORWARD	5739.65	9636.95
Brapa_ESTC024826	AT2G38560	Symbols: | transcription factor S-II (TFIIS) domain-containing protein | chr2:16141880-16143397 FORWARD	6881.64	9631.93
Brapa_ESTC023241	AT4G16110	Symbols: ARR2 | ARR2 (ARABIDOPSIS RESPONSE REGULATOR 2); transcription factor/ two-component response regulator | chr4:9112989-9115646 FORWARD	8583.03	9625.62
Brapa_ESTC028321	AT4G34000	Symbols: ABF3, DPBF5 | ABF3/DPBF5 (ABSCISIC ACID RESPONSIVE ELEMENTS-BINDING FACTOR 3); DNA binding / protein binding / transcription factor/ transcriptional activator | chr4:16296013-16297599 FORWARD	8596.23	9609.77
Brapa_ESTC011095	AT2G45660	Symbols: SOC1, AGL20 | AGL20 (AGAMOUS-LIKE 20); transcription factor | chr2:18814873-18817267 REVERSE	9254.95	9541.1
Brapa_ESTC022413	AT5G67190	Symbols: | AP2 domain-containing transcription factor, putative | chr5:26826361-26826915 REVERSE	10994.2	9430.84
Brapa_ESTC019169	AT2G18280	Symbols: AtTLP2 | AtTLP2 (TUBBY LIKE PROTEIN 2); phosphoric diester hydrolase/ transcription factor | chr2:7953836-7955258 FORWARD	8783.65	9426.04
Brapa_ESTC024788	AT5G47230	Symbols: ATERF-5, ATERF5, ERF5 | ERF5 (ETHYLENE RESPONSIVE ELEMENT BINDING FACTOR 5); DNA binding / transcription factor/ transcriptional activator | chr5:19197299-19198201 FORWARD	3273.46	9400.13
Brapa_ESTC040346	AT1G67970	Symbols: HSFA8, AT-HSFA8 | AT-HSFA8 (Arabidopsis thaliana heat shock transcription factor A8); DNA binding / transcription factor | chr1:25488507-25489976 REVERSE	7777.58	9366.61
Brapa_ESTC023253	AT3G60320	| Symbols: | DNA binding | chr3:22303048-22306203 REVERSE	14450.6	9303.51
Brapa_ESTC033235	AT2G33310	Symbols: IAA13 | IAA13 (indoleacetic acid-induced protein 13); transcription factor | chr2:14121646-14122834 REVERSE	7233.65	9295.34
Brapa_ESTC013503	AT3G15210	Symbols: ATERF-4, ERF4, RAP2.5, ATERF4 | ATERF-4/ATERF4/ERF4/RAP2.5 (ETHYLENE RESPONSIVE ELEMENT BINDING FACTOR 4); DNA binding / protein binding / transcription factor/ transcriptional repressor | chr3:5121479-5122147 FORWARD	8282.63	9287.93
Brapa_ESTC033612	AT2G45160	Symbols: | scarecrow transcription factor family protein | chr2:18625185-18627107 REVERSE	13062.2	9280.54
Brapa_ESTC022570	AT4G18390	Symbols: | TCP family transcription factor, putative | chr4:10163223-10164320 REVERSE	14347.4	9278.09
Brapa_ESTC028476	AT1G19000	Symbols: | myb family transcription factor | chr1:6561326-6562675 REVERSE	13757.6	9244.85
Brapa_ESTC033953	AT5G43250	Symbols: | transcription factor, putative | chr5:17373402-17373794 REVERSE	9390.38	9232.22
Brapa_ESTC048987	AT4G16420	Symbols: PRZ1, ADA2B | ADA2B (PROPORZ1); DNA binding / transcription factor | chr4:9262828-9265798 REVERSE	3887.47	9225.23
Brapa_ESTC022554	AT1G24625	Symbols: ZFP7 | ZFP7 (ZINC FINGER PROTEIN 7); nucleic acid binding / transcription factor/ zinc ion binding | chr1:8725995-8726624 REVERSE	7235.37	9215.83
Brapa_ESTC014488	AT1G08540	Symbols: SIGA, SIG2, SIGB | SIGB (SIGMA FACTOR B); DNA binding / DNA-directed RNA polymerase/ transcription factor | chr1:2703464-2706699 FORWARD	3822.45	9199.7
Brapa_ESTC008907	AT4G01680	Symbols: AtMYB55, MYB55 | MYB55 (myb domain protein 55); DNA binding / transcription factor | chr4:716222-717415 REVERSE	17602	9198.31
Brapa_ESTC048310	AT1G19000	Symbols: | myb family transcription factor | chr1:6561326-6562675 REVERSE	13004.6	9152.42
Brapa_ESTC009638	AT1G72650	Symbols: TRFL6 | TRFL6 (TRF-LIKE 6); DNA binding / transcription factor | chr1:27353915-27357145 FORWARD	6008.71	9150.21
Brapa_ESTC027667	AT5G24590	Symbols: ANAC091, TIP | TIP (TCV-INTERACTING PROTEIN); transcription factor | chr5:8416923-8418726 REVERSE	10565.6	9130.28
Brapa_ESTC007100	AT2G37630	Symbols: AtPHAN, AS1, AtMYB91, MYB91 | AS1 (ASYMMETRIC LEAVES 1); DNA binding / transcription factor | chr2:15788876-15789979 REVERSE	5350.04	9111.1
Brapa_ESTC000220	AT3G22320	Symbols: ATRPABC24.3 | ATRPABC24.3 ("Arabidopsis thaliana RNA polymerase I, II and III 24.3 kDa subunit"); DNA binding / DNA-directed RNA polymerase | chr3:7891052-7892101 REVERSE	5423.24	9095.05
Brapa_ESTC008608	AT3G63030	Symbols: MBD4 | MBD4 (methyl-CpG-binding domain 4); DNA binding | chr3:23306369-23307400 FORWARD	6096.47	9069.08
Brapa_ESTC019168	AT2G38470	Symbols: ATWRKY33, WRKY33 | WRKY33 (WRKY DNA-binding protein 33); transcription factor | chr2:16115554-16117617 FORWARD	6580.79	9022.17
Brapa_ESTC035419	AT2G37550	Symbols: AGD7, ASP1 | ASP1 (PDE1 SUPPRESSOR 1); DNA binding | chr2:15762622-15764534 REVERSE	12881	9010.49
Brapa_ESTC009473	AT5G59820	Symbols: ZAT12, RHL41 | RHL41 (RESPONSIVE TO HIGH LIGHT 41); nucleic acid binding / transcription factor/ zinc ion binding | chr5:24120299-24120787 FORWARD	13307.8	8994.36
Brapa_ESTC008099	AT1G03970	Symbols: GBF4 | GBF4 (G-box binding factor 4); transcription factor | chr1:1018236-1019048 FORWARD	12395.2	8965.41
Brapa_ESTC013113	AT3G12480	Symbols: | transcription factor, putative | chr3:3958072-3960285 FORWARD	9501.08	8963.73
Brapa_ESTC004041	AT4G37650	Symbols: SGR7, SHR | SHR (SHORT ROOT); transcription factor | chr4:17691865-17693460 FORWARD	4543.95	8930.42
Brapa_ESTC014296	AT2G38470	Symbols: ATWRKY33, WRKY33 | WRKY33 (WRKY DNA-binding protein 33); transcription factor | chr2:16115554-16117617 FORWARD	2457.99	8877.99
Brapa_ESTC020833	AT3G17100	| Symbols: | transcription factor | chr3:5831558-5832250 FORWARD	6754.41	8875.92
Brapa_ESTC012691	AT1G79430	Symbols: WDY, APL | APL (ALTERED PHLOEM DEVELOPMENT); transcription factor | chr1:29882414-29884028 REVERSE	6463.88	8860.52
Brapa_ESTC012150	AT3G12480	Symbols: | transcription factor, putative | chr3:3958072-3960285 FORWARD	10162.5	8839.14
Brapa_ESTC019127	AT3G10490	Symbols: ANAC051, ANAC052 | ANAC051/ANAC052 (Arabidopsis NAC domain containing protein 51, Arabidopsis NAC domain containing protein 52); transcription factor | chr3:3268080-3270613 FORWARD	16000.7	8795.1
Brapa_ESTC024998	AT3G52250	Symbols: | myb family transcription factor | chr3:19387607-19394078 FORWARD	13651.9	8778.07
Brapa_ESTC021594	AT1G72830	Symbols: ATHAP2C, HAP2, HAP2C | HAP2C (Heme activator protein (yeast) homolog 2C); transcription factor | chr1:27409361-27410750 REVERSE	4764.34	8771.01
Brapa_ESTC014905	AT5G10510	Symbols: AIL6 | AIL6 (AINTEGUMENTA-LIKE 6); DNA binding / transcription factor | chr5:3316037-3320009 FORWARD	7677.49	8770.31
Brapa_ESTC041065	AT2G21900	Symbols: ATWRKY59, WRKY59 | WRKY59 (WRKY DNA-binding protein 59); transcription factor | chr2:9341229-9343302 REVERSE	5463.85	8763.55
Brapa_ESTC022891	AT2G46870	Symbols: NGA1 | NGA1 (NGATHA1); transcription factor | chr2:19268382-19269314 FORWARD	5343.69	8745.21
Brapa_ESTC017097	AT1G10120	Symbols: | DNA binding / transcription factor | chr1:3304230-3305986 REVERSE	2990.92	8744.25
Brapa_ESTC020136	AT1G67970	Symbols: HSFA8, AT-HSFA8 | AT-HSFA8 (Arabidopsis thaliana heat shock transcription factor A8); DNA binding / transcription factor | chr1:25488507-25489976 REVERSE	6738.19	8719.93
Brapa_ESTC023281	AT3G20770	Symbols: EIN3 | EIN3 (ETHYLENE-INSENSITIVE3); transcription factor | chr3:7260708-7262594 REVERSE	16123.5	8716.65
Brapa_ESTC000465	AT3G16500	Symbols: IAA26, PAP1 | PAP1 (PHYTOCHROME-ASSOCIATED PROTEIN 1); transcription factor | chr3:5612807-5614214 REVERSE	11954.3	8711.68
Brapa_ESTC046120	AT5G46880	Symbols: HB-7 | HB-7 (homeobox-7); DNA binding / transcription factor | chr5:19048767-19052615 FORWARD	8686.9	8710.34
Brapa_ESTC012140	AT1G69490	Symbols: ANAC029, ATNAP, NAP | NAP (NAC-LIKE, ACTIVATED BY AP3/PI); transcription factor | chr1:26125896-26126885 FORWARD	6994.96	8684.95
Brapa_ESTC014268	AT1G19000	Symbols: | myb family transcription factor | chr1:6561326-6562675 REVERSE	7769.1	8631.07
Brapa_ESTC007476	AT3G20770	Symbols: EIN3 | EIN3 (ETHYLENE-INSENSITIVE3); transcription factor | chr3:7260708-7262594 REVERSE	9234.76	8617.18
Brapa_ESTC031156	AT3G15540	Symbols: MSG2, IAA19 | IAA19 (indoleacetic acid-induced protein 19); transcription factor | chr3:5264107-5265385 FORWARD	10506.4	8542.45
Brapa_ESTC034987	AT5G60120	Symbols: TOE2 | TOE2 (TARGET OF EAT1 2); DNA binding / transcription factor | chr5:24225379-24228293 FORWARD	8242.17	8537.9
Brapa_ESTC028682	AT4G22140	| Symbols: | DNA binding | chr4:11728105-11730242 REVERSE	2766.01	8532.69
Brapa_ESTC008878	AT4G31920	Symbols: ARR10 | ARR10 (ARABIDOPSIS RESPONSE REGULATOR 10); transcription factor/ two-component response regulator | chr4:15444296-15446772 REVERSE	8392.76	8516.4
Brapa_ESTC013289	AT5G11260	Symbols: TED 5, HY5 | HY5 (ELONGATED HYPOCOTYL 5); DNA binding / transcription factor | chr5:3593584-3594801 REVERSE	16547.9	8464.27
Brapa_ESTC009002	AT2G46970	Symbols: PIL1 | PIL1 (PHYTOCHROME INTERACTING FACTOR 3-LIKE 1); transcription factor | chr2:19302686-19304747 REVERSE	2066.69	8456.59
Brapa_ESTC032284	AT4G01280	Symbols: | DNA binding / transcription factor | chr4:535288-536854 FORWARD	6546.69	8452.95
Brapa_ESTC002810	AT1G08465	Symbols: YAB2 | YAB2 (YABBY 2); transcription factor | chr1:2676030-2679385 FORWARD	8028.3	8441.97
Brapa_ESTC033598	AT3G60320	| Symbols: | DNA binding | chr3:22303048-22306203 REVERSE	12281.2	8381.51
Brapa_ESTC025179	AT1G72830	Symbols: ATHAP2C, HAP2, HAP2C | HAP2C (Heme activator protein (yeast) homolog 2C); transcription factor | chr1:27409361-27410750 REVERSE	4140.54	8366.42
Brapa_ESTC011152	AT3G13445	Symbols: TFIID-1, TBP1 | TBP1 (transcription factor IID-1); DNA binding / RNA polymerase II transcription factor | chr3:4380324-4381876 FORWARD	8672.7	8355.33
Brapa_ESTC022404	AT3G12480	Symbols: | transcription factor, putative | chr3:3958072-3960285 FORWARD	5130.99	8264.63
Brapa_ESTC007102	AT5G24800	Symbols: ATBZIP9, BZO2H2 | BZO2H2 (basic leucine zipper O2 homolog 2); DNA binding / transcription factor | chr5:8515262-8516544 FORWARD	3347.13	8213.95
Brapa_ESTC038180	AT5G48150	Symbols: PAT1 | PAT1 (PHYTOCHROME A SIGNAL TRANSDUCTION 1); transcription factor | chr5:19539723-19541279 REVERSE	9814.74	8201.77
Brapa_ESTC022050	AT5G12840	Symbols: EMB2220, HAP2, ATHAP2A | HAP2A (EMBRYO DEFECTIVE 2220); transcription factor | chr5:4051150-4052964 REVERSE	5195.62	8198.6
Brapa_ESTC029339	AT2G35530	Symbols: | bZIP transcription factor family protein | chr2:14930359-14933104 REVERSE	7388.63	8181.28
Brapa_ESTC011075	AT5G42520	Symbols: BPC6, BBR/BPC6, ATBPC6 | ATBPC6/BBR/BPC6/BPC6 (BASIC PENTACYSTEINE 6); DNA binding / transcription factor | chr5:17018515-17019694 FORWARD	11059.2	8176.65
Brapa_ESTC021498	AT5G65670	Symbols: IAA9 | IAA9 (indoleacetic acid-induced protein 9); transcription factor | chr5:26271689-26273360 FORWARD	16898.3	8174.79
Brapa_ESTC021905	AT5G39660	Symbols: CDF2 | CDF2 (CYCLING DOF FACTOR 2); DNA binding / transcription factor | chr5:15896148-15897940 FORWARD	10167.2	8167.63
Brapa_ESTC020070	AT1G71260	Symbols: ATWHY2 | ATWHY2 (A. THALIANA WHIRLY 2); DNA binding | chr1:26865511-26867053 REVERSE	3737	8112.12
Brapa_ESTC010901	AT1G76900	Symbols: AtTLP1 | AtTLP1 (TUBBY LIKE PROTEIN 1); phosphoric diester hydrolase/ transcription factor | chr1:28887635-28889271 FORWARD	11909.5	8091.36
Brapa_ESTC011528	AT3G54620	Symbols: ATBZIP25, BZO2H4 | BZO2H4 (basic leucine zipper O2 homolog 4); transcription factor | chr3:20229063-20231319 REVERSE	18108.7	8070.96
Brapa_ESTC036933	AT4G24470	Symbols: ZIM | ZIM (ZINC-FINGER PROTEIN EXPRESSED IN INFLORESCENCE MERISTEM); transcription factor | chr4:12645795-12647744 FORWARD	3283.18	8041.14
Brapa_ESTC011456	AT3G02990	Symbols: HSFA1E, ATHSFA1E | ATHSFA1E (Arabidopsis thaliana heat shock transcription factor A1E); DNA binding / transcription factor | chr3:673621-675995 FORWARD	3330.15	7992.29
Brapa_ESTC039276	AT1G02340	Symbols: RSF1, FBI1, REP1, HFR1 | HFR1 (LONG HYPOCOTYL IN FAR-RED); DNA binding / transcription factor | chr1:465933-467685 REVERSE	16335.7	7991.54
Brapa_ESTC023709	AT1G50840	Symbols: POLGAMMA2 | POLGAMMA2 (polymerase gamma 2); DNA binding / DNA-directed DNA polymerase | chr1:18842945-18847981 FORWARD	6544.53	7986.71
Brapa_ESTC030877	AT4G02590	Symbols: UNE12 | UNE12 (unfertilized embryo sac 12); DNA binding | chr4:1137968-1140306 REVERSE	7887.39	7983.53
Brapa_ESTC011181	AT5G54930	| Symbols: | DNA binding | chr5:22323123-22324065 REVERSE	9752.55	7977.21
Brapa_ESTC025998	AT3G25890	Symbols: | AP2 domain-containing transcription factor, putative | chr3:9477289-9478287 FORWARD	8698.52	7860.21
Brapa_ESTC014982	AT2G38470	Symbols: ATWRKY33, WRKY33 | WRKY33 (WRKY DNA-binding protein 33); transcription factor | chr2:16115554-16117617 FORWARD	5718.46	7813.44
Brapa_ESTC023093	AT5G47640	Symbols: | CCAAT-box binding transcription factor subunit B (NF-YB) (HAP3 ) (AHAP3) family (Hap3b) | chr5:19326640-19327212 FORWARD	6769.9	7806.75
Brapa_ESTC043337	AT3G25890	Symbols: | AP2 domain-containing transcription factor, putative | chr3:9477289-9478287 FORWARD	8952.63	7759.89
Brapa_ESTC019022	AT2G27230	Symbols: | transcription factor-related | chr2:11657973-11660918 FORWARD	15188.2	7724.65
Brapa_ESTC011444	AT1G28370	Symbols: ERF11, ATERF11 | ATERF11/ERF11 (ERF domain protein 11); DNA binding / transcription factor/ transcriptional repressor | chr1:9956337-9956837 REVERSE	4464.76	7722.21
Brapa_ESTC000727	AT3G47500	Symbols: CDF3 | CDF3 (CYCLING DOF FACTOR 3); DNA binding / protein binding / transcription factor | chr3:17515261-17516949 REVERSE	21925.6	7712.62
Brapa_ESTC014403	AT5G11060	Symbols: KNAT4 | KNAT4 (KNOTTED1-LIKE HOMEOBOX GENE 4); transcription factor | chr5:3510409-3512968 FORWARD	8461.12	7682.07
Brapa_ESTC037082	AT2G16770	Symbols: | DNA binding / transcription factor | chr2:7286941-7287899 FORWARD	6951.45	7630.56
Brapa_ESTC024817	AT3G50060	Symbols: | myb family transcription factor | chr3:18569129-18570034 REVERSE	12836.6	7626.69
Brapa_ESTC016400	AT2G36720	Symbols: | PHD finger transcription factor, putative | chr2:15400526-15406268 FORWARD	5193.66	7623.55
Brapa_ESTC033367	AT5G11260	Symbols: TED 5, HY5 | HY5 (ELONGATED HYPOCOTYL 5); DNA binding / transcription factor | chr5:3593584-3594801 REVERSE	23489.7	7579.74
Brapa_ESTC023650	AT5G64810	Symbols: WRKY51 | WRKY51 (WRKY DNA-binding protein 51); transcription factor | chr5:25925641-25926913 FORWARD	1405.91	7573.35
Brapa_ESTC010276	AT2G01760	Symbols: ARR14 | ARR14 (ARABIDOPSIS RESPONSE REGULATOR 14); transcription factor/ two-component response regulator | chr2:333040-334513 FORWARD	5676.68	7570.17
Brapa_ESTC050175	AT2G22540	Symbols: AGL22, SVP | SVP (SHORT VEGETATIVE PHASE); transcription factor | chr2:9587497-9590683 FORWARD	5789.11	7553.28
Brapa_ESTC013059	AT5G44190	Symbols: ATGLK2, GPRI2, GLK2 | GLK2 (GOLDEN2-LIKE 2); DNA binding / transcription factor | chr5:17815662-17817874 FORWARD	2180.4	7473.5
Brapa_ESTC008221	AT5G62165	Symbols: AGL42 | AGL42 (AGAMOUS LIKE 42); transcription factor | chr5:24982301-24985663 FORWARD	5547.53	7441.53
Brapa_ESTC000396	AT1G77080	Symbols: FLM, AGL27, MAF1 | MAF1 (MADS AFFECTING FLOWERING 1); transcription factor | chr1:28960573-28964739 FORWARD	4849.39	7421.52
Brapa_ESTC008994	AT5G02840	Symbols: | DNA binding / transcription factor | chr5:648792-651202 FORWARD	3669.08	7405.49
Brapa_ESTC046782	AT5G02030	Symbols: HB-6, PNY, BLR, RPL, BLH9, VAN, LSN | LSN (LARSON, VAAMANA); DNA binding / transcription factor | chr5:395751-398869 FORWARD	8969.89	7400.62
Brapa_ESTC048001	AT1G55520	Symbols: ATTBP2 | TBP2 (TATA binding protein 2); DNA binding / RNA polymerase II transcription factor | chr1:20729816-20731149 REVERSE	5558.53	7375.69
Brapa_ESTC018612	AT5G56860	Symbols: GNC | GNC (GATA, NITRATE-INDUCIBLE, CARBON METABOLISM-INVOLVED); transcription factor | chr5:23006856-23008577 REVERSE	5031.99	7364.89
Brapa_ESTC002137	AT2G33310	Symbols: IAA13 | IAA13 (indoleacetic acid-induced protein 13); transcription factor | chr2:14121646-14122834 REVERSE	4696.37	7356.01
Brapa_ESTC016106	AT3G01140	Symbols: AtMYB106, MYB106 | MYB106 (myb domain protein 106); DNA binding / transcription factor | chr3:46626-48150 REVERSE	3526.21	7339.47
Brapa_ESTC019081	AT5G15650	Symbols: REVERSIBLY GLYCOSYLATED POLYPEPTIDE 2, RGP2 | RGP2 (Reversibly glycosylated polypeptide-3); DNA binding / alpha-1,4-glucan-protein synthase (UDP-forming) | chr5:5092206-5094096 FORWARD	16158.4	7319.07
Brapa_ESTC034183	AT1G34190	Symbols: ANAC017 | ANAC017 (Arabidopsis NAC domain containing protein 17); transcription factor | chr1:12451707-12453892 FORWARD	7281.1	7300.6
Brapa_ESTC021474	AT3G12480	Symbols: | transcription factor, putative | chr3:3958072-3960285 FORWARD	3484.14	7274.41
Brapa_ESTC048548	AT3G52250	Symbols: | myb family transcription factor | chr3:19387607-19394078 FORWARD	3472.44	7229.82
Brapa_ESTC042137	AT2G46970	Symbols: PIL1 | PIL1 (PHYTOCHROME INTERACTING FACTOR 3-LIKE 1); transcription factor | chr2:19302686-19304747 REVERSE	724.889	7196.86
Brapa_ESTC034113	AT1G69780	Symbols: ATHB13 | ATHB13 (ARABIDOPSIS THALIANA HOMEOBOX PROTEIN 12); DNA binding / transcription factor | chr1:26262829-26264128 FORWARD	18985.4	7154.11
Brapa_ESTC045668	AT5G14000	Symbols: ANAC084 | ANAC084 (Arabidopsis NAC domain containing protein 84); transcription factor | chr5:4518179-4519036 FORWARD	2351.04	7149.09
Brapa_ESTC003368	AT4G36730	Symbols: GBF1 | GBF1 (G-box binding factor 1); transcription factor | chr4:17309854-17311756 REVERSE	11448.8	7131.06
Brapa_ESTC032065	AT1G15215	Symbols: | similar to DNA binding / sequence-specific DNA binding / transcription factor [Arabidopsis thaliana] (TAIR:AT3G18380.1); similar to unknown protein [Oryza sativa (japonica cultivar-group)] (GB:BAD37623.1); contains domain Chromo domain-like (SSF54160) | chr1:5238091-5239765 FORWARD	1074.71	7129.44
Brapa_ESTC006513	AT3G60320	| Symbols: | DNA binding | chr3:22303048-22306203 REVERSE	9925.71	7100.99
Brapa_ESTC010773	AT4G18390	Symbols: | TCP family transcription factor, putative | chr4:10163223-10164320 REVERSE	8576.05	7094.26
Brapa_ESTC015273	AT3G54390	| Symbols: | transcription factor | chr3:20148890-20149841 REVERSE	8254.84	7038.41
Brapa_ESTC032913	AT3G24120	Symbols: | myb family transcription factor | chr3:8705932-8708155 REVERSE	6769.48	7031.55
Brapa_ESTC013147	AT3G16770	Symbols: RAP2.3, ATEBP | ATEBP/RAP2.3 (RELATED TO AP2 3); DNA binding / protein binding / transcription factor/ transcriptional activator | chr3:5705790-5706774 FORWARD	16711.4	7022.53
Brapa_ESTC043727	AT3G54810	Symbols: BME3-ZF, BME3 | BME3/BME3-ZF (BLUE MICROPLYLAR END3); transcription factor | chr3:20307935-20309214 FORWARD	18916.2	7020.77
Brapa_ESTC012054	AT2G30250	Symbols: ATWRKY25, WRKY25 | WRKY25 (WRKY DNA-binding protein 25); transcription factor | chr2:12910630-12912166 REVERSE	22592.2	6997.29
Brapa_ESTC005943	AT4G16420	Symbols: PRZ1, ADA2B | ADA2B (PROPORZ1); DNA binding / transcription factor | chr4:9262828-9265798 REVERSE	7628.68	6954.73
Brapa_ESTC050954	AT2G42680	Symbols: MBF1A, ATMBF1A | ATMBF1A/MBF1A (MULTIPROTEIN BRIDGING FACTOR 1A); DNA binding / transcription coactivator | chr2:17782049-17783193 FORWARD	8529.03	6951.73
Brapa_ESTC007776	AT3G15030	Symbols: MEE35, TCP4 | TCP4 (TCP family transcription factor 4, maternal effect embryo arrest 35); transcription factor | chr3:5062315-5063577 FORWARD	7802.53	6938
Brapa_ESTC005608	AT1G25580	Symbols: ANAC008 | ANAC008 (Arabidopsis NAC domain containing protein 8); transcription factor | chr1:8997051-8999587 REVERSE	1738.64	6920.96
Brapa_ESTC000602	AT3G20770	Symbols: EIN3 | EIN3 (ETHYLENE-INSENSITIVE3); transcription factor | chr3:7260708-7262594 REVERSE	12711.4	6912.82
Brapa_ESTC012450	AT5G48150	Symbols: PAT1 | PAT1 (PHYTOCHROME A SIGNAL TRANSDUCTION 1); transcription factor | chr5:19539723-19541279 REVERSE	9237.81	6894.2
Brapa_ESTC004910	AT2G30590	Symbols: WRKY21 | WRKY21 (WRKY DNA-binding protein 21); transcription factor | chr2:13040968-13042380 FORWARD	8096.97	6879.9
Brapa_ESTC030850	AT4G02640	Symbols: ATBZIP10, BZO2H1 | BZO2H1 (basic leucine zipper O2 homolog 1); DNA binding / transcription factor | chr4:1154031-1156085 FORWARD	5474.56	6879.63
Brapa_ESTC016293	AT3G46640	Symbols: LUX, PCL1 | PCL1 (PHYTOCLOCK 1); DNA binding | chr3:17194233-17195204 FORWARD	14949.5	6855.51
Brapa_ESTC019188	AT3G14230	Symbols: RAP2.2 | RAP2.2; DNA binding / transcription factor | chr3:4737623-4739007 REVERSE	11881.2	6845.02
Brapa_ESTC051904	AT3G28920	Symbols: ATHB34 | ATHB34 (ARABIDOPSIS THALIANA HOMEOBOX PROTEIN 34); DNA binding / transcription factor | chr3:10941835-10942773 REVERSE	10689.1	6838.85
Brapa_ESTC006750	AT2G23760	Symbols: BLH4 | BLH4 (BLH4); DNA binding | chr2:10115031-10119816 REVERSE	8639.78	6815.45
Brapa_ESTC008613	AT5G56860	Symbols: GNC | GNC (GATA, NITRATE-INDUCIBLE, CARBON METABOLISM-INVOLVED); transcription factor | chr5:23006856-23008577 REVERSE	3019.68	6806.52
Brapa_ESTC004221	AT2G42680	Symbols: MBF1A, ATMBF1A | ATMBF1A/MBF1A (MULTIPROTEIN BRIDGING FACTOR 1A); DNA binding / transcription coactivator | chr2:17782049-17783193 FORWARD	5446.16	6796.69
Brapa_ESTC013314	AT3G23240	Symbols: ATERF1, ERF1 | ATERF1/ERF1 (ETHYLENE RESPONSE FACTOR 1); DNA binding / transcription factor/ transcriptional activator | chr3:8295712-8296368 FORWARD	4432.65	6783.62
Brapa_ESTC031763	AT3G28910	Symbols: AtMYB30, MYB30 | MYB30 (myb domain protein 30); DNA binding / transcription factor | chr3:10912680-10914093 FORWARD	4397.91	6770.11
Brapa_ESTC027814	AT2G15430	Symbols: RPB35.5A, RBP36A | RBP36A (RNA polymerase II 36 kDa polypeptide A); DNA binding / DNA-directed RNA polymerase | chr2:6740743-6742564 FORWARD	10279.3	6763.73
Brapa_ESTC045555	AT5G13180	Symbols: ANAC083 | ANAC083 (Arabidopsis NAC domain containing protein 83); transcription factor | chr5:4196646-4197580 FORWARD	4102.46	6761.88
Brapa_ESTC035815	AT5G23420	Symbols: HMGB6 | HMGB6 (High mobility group B 6); transcription factor | chr5:7888715-7890114 REVERSE	4718.68	6747.91
Brapa_ESTC032629	AT3G21175	Symbols: ZML1 | ZML1 (ZIM-LIKE 1); transcription factor | chr3:7422838-7424604 FORWARD	9125.13	6745.38
Brapa_ESTC040694	AT3G19184	| Symbols: | DNA binding | chr3:6637561-6639041 FORWARD	9292.76	6738.82
Brapa_ESTC011788	AT1G09250	| Symbols: | transcription factor | chr1:2989511-2990134 FORWARD	1532.85	6736.02
Brapa_ESTC026694	AT1G69010	Symbols: BIM2 | BIM2 (BES1-INTERACTING MYC-LIKE PROTEIN 2); DNA binding / transcription factor | chr1:25945467-25947262 FORWARD	4445.58	6732.7
Brapa_ESTC020232	AT4G35040	Symbols: | bZIP transcription factor family protein | chr4:16680826-16681810 FORWARD	6518.2	6730.69
Brapa_ESTC038724	AT1G10120	Symbols: | DNA binding / transcription factor | chr1:3304230-3305986 REVERSE	1563.35	6716.21
Brapa_ESTC023623	AT5G07100	Symbols: WRKY26 | WRKY26 (WRKY DNA-binding protein 26); transcription factor | chr5:2204814-2205648 FORWARD	2970.58	6686.5
Brapa_ESTC009072	AT5G65410	Symbols: ATHB25, ZFHD2 | ATHB25/ZFHD2 (ZINC FINGER HOMEODOMAIN 2); DNA binding / transcription factor | chr5:26153405-26154244 FORWARD	2342.18	6679.97
Brapa_ESTC041927	AT2G41940	Symbols: ZFP8 | ZFP8 (ZINC FINGER PROTEIN 8); nucleic acid binding / transcription factor/ zinc ion binding | chr2:17514634-17515407 FORWARD	1549.78	6679.08
Brapa_ESTC030308	AT2G02070	Symbols: ATIDD5 | ATIDD5 (ARABIDOPSIS THALIANA INDETERMINATE(ID)-DOMAIN 5); nucleic acid binding / transcription factor/ zinc ion binding | chr2:505522-509153 FORWARD	5211.86	6670.84
Brapa_ESTC002441	AT1G69780	Symbols: ATHB13 | ATHB13 (ARABIDOPSIS THALIANA HOMEOBOX PROTEIN 12); DNA binding / transcription factor | chr1:26262829-26264128 FORWARD	9992.82	6662.14
Brapa_ESTC031555	AT1G28420	Symbols: HB-1 | HB-1 (homeobox-1); transcription factor | chr1:9979928-9987446 FORWARD	8244.93	6646.34
Brapa_ESTC018689	AT2G27100	Symbols: SE | SE (SERRATE); transcription factor | chr2:11579665-11583435 FORWARD	11436.6	6627.03
Brapa_ESTC004948	AT4G02590	Symbols: UNE12 | UNE12 (unfertilized embryo sac 12); DNA binding | chr4:1137968-1140306 REVERSE	6455.94	6617.71
Brapa_ESTC022355	AT5G47370	Symbols: HAT2 | HAT2; transcription factor | chr5:19233709-19234874 REVERSE	8870.28	6616.84
Brapa_ESTC009204	AT3G56400	Symbols: ATWRKY70, WRKY70 | WRKY70 (WRKY DNA-binding protein 70); transcription factor | chr3:20920061-20921388 REVERSE	1702.14	6614.2
Brapa_ESTC013454	AT5G07580	Symbols: | DNA binding / transcription factor | chr5:2399526-2400350 FORWARD	9306.58	6589.24
Brapa_ESTC040750	AT1G75240	Symbols: ATHB33 | ATHB33 (ARABIDOPSIS THALIANA HOMEOBOX PROTEIN 33); DNA binding / transcription factor | chr1:28245237-28246166 FORWARD	2009.19	6571.48
Brapa_ESTC033326	AT5G62020	Symbols: HSFB2A, AT-HSFB2A | AT-HSFB2A (Arabidopsis thaliana heat shock transcription factor B2A); DNA binding / transcription factor | chr5:24933438-24934420 FORWARD	6883.3	6570.21
Brapa_ESTC013809	AT3G05800	| Symbols: | transcription factor | chr3:1727482-1728117 FORWARD	5120.55	6548.31
Brapa_ESTC003230	AT1G80840	Symbols: ATWRKY40, WRKY40 | WRKY40 (WRKY DNA-binding protein 40); transcription factor | chr1:30388726-30390248 FORWARD	15663.4	6546.25
Brapa_ESTC010993	AT4G25490	Symbols: DREB1B, CBF1 | CBF1 (C-REPEAT/DRE BINDING FACTOR 1); DNA binding / transcription factor/ transcriptional activator | chr4:13021931-13022572 REVERSE	16416.9	6545.29
Brapa_ESTC046141	AT5G46750	Symbols: AGD8 | AGD8 (ARF-GAP DOMAIN 8); DNA binding | chr5:18987177-18989044 REVERSE	8843.77	6537.43
Brapa_ESTC011381	AT3G25890	Symbols: | AP2 domain-containing transcription factor, putative | chr3:9477289-9478287 FORWARD	7454.96	6531.26
Brapa_ESTC017140	AT1G79430	Symbols: WDY, APL | APL (ALTERED PHLOEM DEVELOPMENT); transcription factor | chr1:29882414-29884028 REVERSE	4833.2	6498.48
Brapa_ESTC014118	AT3G14230	Symbols: RAP2.2 | RAP2.2; DNA binding / transcription factor | chr3:4737623-4739007 REVERSE	15699.6	6466.64
Brapa_ESTC005647	AT1G04250	Symbols: IAA17, AXR3 | AXR3 (AUXIN RESISTANT 3); transcription factor | chr1:1136381-1138339 FORWARD	4503.84	6442.97
Brapa_ESTC007121	AT3G46600	Symbols: | scarecrow transcription factor family protein | chr3:17169037-17170784 FORWARD	12160.7	6393.04
Brapa_ESTC018072	AT3G60320	| Symbols: | DNA binding | chr3:22303048-22306203 REVERSE	6874.32	6390.94
Brapa_ESTC023270	AT4G35040	Symbols: | bZIP transcription factor family protein | chr4:16680826-16681810 FORWARD	7130.12	6380.72
Brapa_ESTC024612	AT5G65210	Symbols: | DNA binding / calmodulin binding / transcription factor | chr5:26076257-26077975 FORWARD	1723.55	6368.9
Brapa_ESTC009439	AT5G44190	Symbols: ATGLK2, GPRI2, GLK2 | GLK2 (GOLDEN2-LIKE 2); DNA binding / transcription factor | chr5:17815662-17817874 FORWARD	1970.91	6330.33
Brapa_ESTC031586	AT1G64100	| Symbols: | DNA binding / binding | chr1:23795248-23799226 FORWARD	3427.11	6316.45
Brapa_ESTC012208	AT1G25560	Symbols: | AP2 domain-containing transcription factor, putative | chr1:8981878-8982963 REVERSE	10860	6314.65
Brapa_ESTC046191	AT5G47370	Symbols: HAT2 | HAT2; transcription factor | chr5:19233709-19234874 REVERSE	5390.8	6307.52
Brapa_ESTC032801	AT3G20540	Symbols: POLGAMMA1 | POLGAMMA1 (polymerase gamma 1); DNA binding / DNA-directed DNA polymerase | chr3:7168267-7173363 FORWARD	4165.71	6289.2
Brapa_ESTC014008	AT5G67190	Symbols: | AP2 domain-containing transcription factor, putative | chr5:26826361-26826915 REVERSE	7678.23	6268.66
Brapa_ESTC011779	AT5G05410	Symbols: DREB2, DREB2A | DREB2A (DRE-BINDING PROTEIN 2A); DNA binding / transcription factor/ transcriptional activator | chr5:1602651-1603658 FORWARD	31949.7	6257.95
Brapa_ESTC020903	AT3G17100	| Symbols: | transcription factor | chr3:5831558-5832250 FORWARD	3671.3	6252.12
Brapa_ESTC024784	AT4G01520	Symbols: ANAC067 | ANAC067 (Arabidopsis NAC domain containing protein 67); transcription factor | chr4:656407-659178 REVERSE	18504.2	6250.22
Brapa_ESTC001709	AT1G71130	Symbols: | AP2 domain-containing transcription factor, putative | chr1:26826539-26827024 FORWARD	5244.95	6234.68
Brapa_ESTC023773	AT5G43700	Symbols: IAA4, ATAUX2-11 | ATAUX2-11 (indoleacetic acid-induced protein 4); transcription factor | chr5:17567692-17568433 FORWARD	2955.23	6213.36
Brapa_ESTC016618	AT1G07530	Symbols: | scarecrow-like transcription factor 14 (SCL14) | chr1:2313825-2316134 REVERSE	8243.79	6194.38
Brapa_ESTC024581	AT2G38470	Symbols: ATWRKY33, WRKY33 | WRKY33 (WRKY DNA-binding protein 33); transcription factor | chr2:16115554-16117617 FORWARD	3544.78	6188.78
Brapa_ESTC048654	AT1G49950	Symbols: ATTRB1, TRB1 | ATTRB1/TRB1 (TELOMERE REPEAT BINDING FACTOR 1); DNA binding / transcription factor | chr1:18498107-18500381 REVERSE	3352.33	6186.63
Brapa_ESTC022124	AT1G18400	Symbols: BEE1 | BEE1 (BR ENHANCED EXPRESSION 1); transcription factor | chr1:6331457-6333569 FORWARD	5655.11	6181.97
Brapa_ESTC027287	AT4G36730	Symbols: GBF1 | GBF1 (G-box binding factor 1); transcription factor | chr4:17309854-17311756 REVERSE	9215.25	6168.92
Brapa_ESTC041759	AT2G36270	Symbols: GIA1, ABI5 | ABI5 (ABA INSENSITIVE 5); DNA binding / transcription factor/ transcriptional activator | chr2:15212059-15213650 REVERSE	6457.4	6131.11
Brapa_ESTC044727	AT4G31550	Symbols: ATWRKY11, WRKY11 | WRKY11 (WRKY DNA-binding protein 11); transcription factor | chr4:15290071-15291464 REVERSE	10725.8	6111.32
Brapa_ESTC011388	AT3G21270	Symbols: ADOF2 | ADOF2 (Arabidopsis dof zinc finger protein 2); DNA binding / transcription factor | chr3:7474940-7475554 FORWARD	3736.51	6104.62
Brapa_ESTC012376	AT1G15215	Symbols: | similar to DNA binding / sequence-specific DNA binding / transcription factor [Arabidopsis thaliana] (TAIR:AT3G18380.1); similar to unknown protein [Oryza sativa (japonica cultivar-group)] (GB:BAD37623.1); contains domain Chromo domain-like (SSF54160) | chr1:5238091-5239765 FORWARD	850.211	6086.63
Brapa_ESTC024805	AT3G28910	Symbols: AtMYB30, MYB30 | MYB30 (myb domain protein 30); DNA binding / transcription factor | chr3:10912680-10914093 FORWARD	2592.6	6066.88
Brapa_ESTC012609	AT3G16500	Symbols: IAA26, PAP1 | PAP1 (PHYTOCHROME-ASSOCIATED PROTEIN 1); transcription factor | chr3:5612807-5614214 REVERSE	7659.22	6064.02
Brapa_ESTC038866	AT3G63030	Symbols: MBD4 | MBD4 (methyl-CpG-binding domain 4); DNA binding | chr3:23306369-23307400 FORWARD	6642.62	6049.43
Brapa_ESTC028623	AT1G19700	Symbols: BEL10 | BEL10 (BEL1-LIKE HOMEODOMAIN 10); DNA binding / transcription factor | chr1:6809949-6811845 REVERSE	7250.03	5993.4
Brapa_ESTC023903	AT2G40750	Symbols: ATWRKY54, WRKY54 | WRKY54 (WRKY DNA-binding protein 54); transcription factor | chr2:17007714-17009432 REVERSE	2505.46	5992.91
Brapa_ESTC001127	AT5G60410	Symbols: ATSIZ1, SIZ1 | ATSIZ1/SIZ1; DNA binding / SUMO ligase | chr5:24312452-24317897 FORWARD	8256.68	5945.77
Brapa_ESTC024917	AT5G04340	Symbols: C2H2 | C2H2; nucleic acid binding / transcription factor/ zinc ion binding | chr5:1216322-1217038 REVERSE	20353.5	5945.14
Brapa_ESTC027139	AT3G25940	Symbols: | transcription factor S-II (TFIIS) domain-containing protein | chr3:9496341-9497179 FORWARD	5488.84	5944.08
Brapa_ESTC005989	AT1G80840	Symbols: ATWRKY40, WRKY40 | WRKY40 (WRKY DNA-binding protein 40); transcription factor | chr1:30388726-30390248 FORWARD	17946.3	5925.34
Brapa_ESTC004992	AT2G37550	Symbols: AGD7, ASP1 | ASP1 (PDE1 SUPPRESSOR 1); DNA binding | chr2:15762622-15764534 REVERSE	7316.76	5906.49
Brapa_ESTC034271	AT1G49980	Symbols: | similar to REV1 (Reversionless 1), damaged DNA binding / magnesium ion binding / nucleotidyltransferase [Arabidopsis thaliana] (TAIR:AT5G44750.1); similar to putative DNA-directed polymerase, having alternative splicing products [Oryza sativa (japonica cultivar-group)] (GB:AAT81653.1); similar to Os03g0616300 [Oryza sativa (japonica cultivar-group)] (GB:NP_001050660.1); contains InterP…	1966.19	5847.27
Brapa_ESTC043570	AT3G52250	Symbols: | myb family transcription factor | chr3:19387607-19394078 FORWARD	7502.34	5843.95
Brapa_ESTC013716	AT1G49480	Symbols: RTV1 | RTV1 (RELATED TO VERNALIZATION1 1); DNA binding / transcription factor | chr1:18318264-18319128 REVERSE	2527.78	5836.67
Brapa_ESTC012100	AT4G28610	Symbols: ATPHR1, PHR1 | PHR1 (PHOSPHATE STARVATION RESPONSE 1); transcription factor | chr4:14133170-14134957 REVERSE	15051.6	5834.04
Brapa_ESTC016051	AT3G49530	Symbols: ANAC062 | ANAC062 (Arabidopsis NAC domain containing protein 62); transcription factor | chr3:18373624-18375702 REVERSE	14300.8	5823.82
Brapa_ESTC005290	AT4G10710	Symbols: SPT16 | SPT16 (GLOBAL transcription factor C); metalloexopeptidase | chr4:6602222-6605446 REVERSE	8232.52	5814.24
Brapa_ESTC014334	AT1G74430	Symbols: AtMYB95, AtMYBCP66, MYB95 | MYB95 (myb domain protein 95); DNA binding / transcription factor | chr1:27979070-27980779 FORWARD	3593.55	5797.14
Brapa_ESTC030040	AT5G05790	Symbols: | myb family transcription factor | chr5:1740725-1741672 REVERSE	4575.67	5785.61
Brapa_ESTC013329	AT4G38910	Symbols: BPC5, BBR/BPC5, ATBPC5 | ATBPC5/BBR/BPC5/BPC5 (BASIC PENTACYSTEINE 5); DNA binding / transcription factor | chr4:18144519-18146465 REVERSE	2336.92	5780.36
Brapa_ESTC026099	AT3G10490	Symbols: ANAC051, ANAC052 | ANAC051/ANAC052 (Arabidopsis NAC domain containing protein 51, Arabidopsis NAC domain containing protein 52); transcription factor | chr3:3268080-3270613 FORWARD	10687.5	5776.36
Brapa_ESTC005984	AT1G75240	Symbols: ATHB33 | ATHB33 (ARABIDOPSIS THALIANA HOMEOBOX PROTEIN 33); DNA binding / transcription factor | chr1:28245237-28246166 FORWARD	1823.19	5766.31
Brapa_ESTC019880	AT3G13445	Symbols: TFIID-1, TBP1 | TBP1 (transcription factor IID-1); DNA binding / RNA polymerase II transcription factor | chr3:4380324-4381876 FORWARD	5146.43	5750.88
Brapa_ESTC015164	AT5G59820	Symbols: ZAT12, RHL41 | RHL41 (RESPONSIVE TO HIGH LIGHT 41); nucleic acid binding / transcription factor/ zinc ion binding | chr5:24120299-24120787 FORWARD	10612.4	5743.82
Brapa_ESTC020716	AT5G51230	Symbols: VEF2, CYR1, EMF2 | EMF2 (EMBRYONIC FLOWER 2); transcription factor | chr5:20841379-20846570 FORWARD	4691.35	5718.02
Brapa_ESTC039920	AT1G21970	Symbols: EMB 212, EMB212, LEC1 | LEC1 (LEAFY COTYLEDON 1); transcription factor | chr1:7727739-7729560 REVERSE	5884.1	5711.9
Brapa_ESTC041153	AT4G16420	Symbols: PRZ1, ADA2B | ADA2B (PROPORZ1); DNA binding / transcription factor | chr4:9262828-9265798 REVERSE	3085.09	5701.91
Brapa_ESTC035312	AT1G32130	Symbols: | similar to IWS1 C-terminus family protein [Arabidopsis thaliana] (TAIR:AT4G19000.1); similar to Os01g0147200 [Oryza sativa (japonica cultivar-group)] (GB:NP_001042011.1); similar to unnamed protein product [Ostreococcus tauri] (GB:CAL53710.1); contains InterPro domain IWS1, C-terminal; (InterPro:IPR008654); contains InterPro domain transcription factors TFIIS, elongin A, CRSP70, conser…	10287	5683.69
Brapa_ESTC018786	AT2G43010	Symbols: SRL2, PIF4 | PIF4 (PHYTOCHROME INTERACTING FACTOR 4); DNA binding / transcription factor | chr2:17894080-17895900 FORWARD	9462.43	5642.38
Brapa_ESTC005321	AT1G01010	Symbols: ANAC001 | ANAC001 (Arabidopsis NAC domain containing protein 1); transcription factor | chr1:3760-5630 FORWARD	1447.02	5603.9
Brapa_ESTC006536	AT1G30210	Symbols: TCP24 | TCP24; transcription factor | chr1:10628738-10629712 REVERSE	10313.3	5575.37
Brapa_ESTC046715	AT5G67580	Symbols: TRB2, ATTRB2 | ATTRB2/TRB2 (TELOMERE REPEAT BINDING FACTOR 2); DNA binding / transcription factor | chr5:26973069-26974299 REVERSE	4497.32	5560.68
Brapa_ESTC014704	AT4G31800	Symbols: WRKY18 | WRKY18 (WRKY DNA-binding protein 18); transcription factor | chr4:15383302-15384818 FORWARD	3494.19	5559.14
Brapa_ESTC043015	AT3G13810	Symbols: ATIDD11 | ATIDD11 (ARABIDOPSIS THALIANA INDETERMINATE(ID)-DOMAIN 11); nucleic acid binding / transcription factor/ zinc ion binding | chr3:4544948-4547307 FORWARD	5134.38	5546.17
Brapa_ESTC037252	AT2G36990	Symbols: SIG6, SIGF | SIGF (RNA POLYMERASE SIGMA-70 FACTOR); DNA binding / DNA-directed RNA polymerase/ transcription factor | chr2:15544581-15547095 REVERSE	3769.68	5530.39
Brapa_ESTC019752	AT3G44350	Symbols: ANAC061 | ANAC061 (Arabidopsis NAC domain containing protein 61); transcription factor | chr3:16033823-16035474 REVERSE	4882.2	5514.18
Brapa_ESTC011195	AT2G26280	Symbols: CID7 | CID7; ATP binding / damaged DNA binding | chr2:11195221-11197657 REVERSE	6501.05	5513.16
Brapa_ESTC021914	AT1G09950	Symbols: | transcription factor-related | chr1:3240851-3241543 REVERSE	6904.43	5488.02
Brapa_ESTC030445	AT3G58630	| Symbols: | transcription factor | chr3:21694905-21696748 REVERSE	4278.19	5481.19
Brapa_ESTC012775	AT2G34900	Symbols: IMB1 | IMB1 (IMBIBITION-INDUCIBLE 1); DNA binding | chr2:14730412-14732641 REVERSE	4310.27	5459.04
Brapa_ESTC001012	AT2G30590	Symbols: WRKY21 | WRKY21 (WRKY DNA-binding protein 21); transcription factor | chr2:13040968-13042380 FORWARD	4574.36	5454.02
Brapa_ESTC011117	AT2G24790	Symbols: COL3 | COL3 (CONSTANS-LIKE 3); protein binding / transcription factor/ zinc ion binding | chr2:10574038-10575025 FORWARD	5022.62	5452.54
Brapa_ESTC048547	AT3G52250	Symbols: | myb family transcription factor | chr3:19387607-19394078 FORWARD	2520.09	5448.84
Brapa_ESTC026641	AT1G13260	Symbols: RAV1 | RAV1 (Related to ABI3/VP1 1); DNA binding / transcription factor | chr1:4542383-4543417 FORWARD	7650.53	5442.17
Brapa_ESTC032604	AT1G30500	Symbols: | CCAAT-binding transcription factor (CBF-B/NF-YA) family protein | chr1:10804718-10805878 REVERSE	6627.27	5435.68
Brapa_ESTC042329	AT2G04880	Symbols: ATWRKY1, WRKY1, ZAP1 | ZAP1 (WRKY FAMILY TRANSCRIPTION FACTOR 1); transcription factor/ transcriptional activator | chr2:1718554-1720216 FORWARD	5861.25	5434.61
Brapa_ESTC044575	AT4G28190	Symbols: ULT, ULT1 | ULT1 (ULTRAPETALA1); DNA binding | chr4:13985759-13987056 FORWARD	2226.53	5396.28
Brapa_ESTC032055	AT1G15360	Symbols: SHN1, WIN1 | SHN1/WIN1 (SHINE1); DNA binding / transcription factor | chr1:5283604-5284501 FORWARD	5728.53	5378.9
Brapa_ESTC021200	AT2G03500	Symbols: | myb family transcription factor | chr2:1059923-1062256 FORWARD	6407.13	5376.86
Brapa_ESTC025741	AT3G04670	Symbols: ATWRKY39, WRKY39 | WRKY39 (WRKY DNA-binding protein 39); transcription factor | chr3:1266536-1267697 REVERSE	5122.4	5369.54
Brapa_ESTC036152	AT1G72650	Symbols: TRFL6 | TRFL6 (TRF-LIKE 6); DNA binding / transcription factor | chr1:27353915-27357145 FORWARD	3629.5	5368.27
Brapa_ESTC040229	AT1G30970	Symbols: SUF4 | SUF4 (SUPPRESSOR OF FRIGIDA4); transcription factor | chr1:11040594-11043574 REVERSE	17514.6	5327.97
Brapa_ESTC007530	AT5G11060	Symbols: KNAT4 | KNAT4 (KNOTTED1-LIKE HOMEOBOX GENE 4); transcription factor | chr5:3510409-3512968 FORWARD	6078.87	5300.99
Brapa_ESTC023388	AT1G07470	Symbols: | transcription factor IIA large subunit, putative / TFIIA large subunit, putative | chr1:2291720-2294347 FORWARD	10087.7	5293.17
Brapa_ESTC007682	AT1G59640	Symbols: BPE, BPEUB, BPEP, ZCW32 | ZCW32 (BIGPETAL, BIGPETALUB); DNA binding / transcription factor | chr1:21913300-21914695 REVERSE	4415.89	5292.58
Brapa_ESTC009730	AT5G62430	Symbols: CDF1 | CDF1 (CYCLING DOF FACTOR 1); DNA binding / protein binding / transcription factor | chr5:25086524-25088013 REVERSE	1726.35	5292.27
Brapa_ESTC033363	AT5G54310	Symbols: AGD5 | AGD5 (ARF-GAP DOMAIN 5); DNA binding | chr5:22074488-22078292 REVERSE	8093.69	5273.29
Brapa_ESTC026791	AT5G64530	Symbols: ANAC104, XND1 | ANAC104/XND1 (Arabidopsis NAC domain containing protein 104); transcription factor | chr5:25812586-25813925 FORWARD	3601.17	5272.3
Brapa_ESTC018655	AT3G13810	Symbols: ATIDD11 | ATIDD11 (ARABIDOPSIS THALIANA INDETERMINATE(ID)-DOMAIN 11); nucleic acid binding / transcription factor/ zinc ion binding | chr3:4544948-4547307 FORWARD	5081.71	5268.52
Brapa_ESTC035822	AT5G23280	Symbols: | TCP family transcription factor, putative | chr5:7843020-7843772 FORWARD	4096.4	5259.38
Brapa_ESTC011745	AT5G47220	Symbols: ATERF2, ATERF-2, ERF2 | ATERF-2/ATERF2/ERF2 (ETHYLENE RESPONSE FACTOR 2); DNA binding / transcription factor/ transcriptional activator | chr5:19189250-19189981 REVERSE	5679.47	5250.18
Brapa_ESTC010318	AT4G04635	Symbols: | DNA binding / transposase | chr4:2347901-2349154 FORWARD	1064.19	5234.49
Brapa_ESTC021680	AT5G02030	Symbols: HB-6, PNY, BLR, RPL, BLH9, VAN, LSN | LSN (LARSON, VAAMANA); DNA binding / transcription factor | chr5:395751-398869 FORWARD	5436.51	5232.55
Brapa_ESTC024490	AT2G40750	Symbols: ATWRKY54, WRKY54 | WRKY54 (WRKY DNA-binding protein 54); transcription factor | chr2:17007714-17009432 REVERSE	702.532	5213.83
Brapa_ESTC014651	AT2G02070	Symbols: ATIDD5 | ATIDD5 (ARABIDOPSIS THALIANA INDETERMINATE(ID)-DOMAIN 5); nucleic acid binding / transcription factor/ zinc ion binding | chr2:505522-509153 FORWARD	9614.98	5211.84
Brapa_ESTC009746	AT3G20910	Symbols: | CCAAT-binding transcription factor (CBF-B/NF-YA) family protein | chr3:7326501-7328375 FORWARD	6880.37	5209.89
Brapa_ESTC011317	AT3G24050	Symbols: | GATA transcription factor 1 (GATA-1) | chr3:8686067-8687469 FORWARD	6428.95	5181.09
Brapa_ESTC003817	AT5G25220	Symbols: KNAT3 | KNAT3 (KNOTTED1-LIKE HOMEOBOX GENE 3); transcription factor | chr5:8736211-8738118 FORWARD	4563.03	5175.12
Brapa_ESTC014600	AT1G72830	Symbols: ATHAP2C, HAP2, HAP2C | HAP2C (Heme activator protein (yeast) homolog 2C); transcription factor | chr1:27409361-27410750 REVERSE	3088.86	5158.93
Brapa_ESTC014066	AT5G14000	Symbols: ANAC084 | ANAC084 (Arabidopsis NAC domain containing protein 84); transcription factor | chr5:4518179-4519036 FORWARD	864.007	5113.38
Brapa_ESTC014554	AT5G59450	Symbols: | scarecrow-like transcription factor 11 (SCL11) | chr5:23992034-23993866 FORWARD	8686.11	5103.69
Brapa_ESTC012934	AT5G04410	Symbols: ANAC078, NAC2 | NAC2 (Arabidopsis NAC domain containing protein 78); transcription factor | chr5:1243981-1246417 FORWARD	9411.88	5095.04
Brapa_ESTC001314	AT1G80840	Symbols: ATWRKY40, WRKY40 | WRKY40 (WRKY DNA-binding protein 40); transcription factor | chr1:30388726-30390248 FORWARD	9414.15	5088.39
Brapa_ESTC010344	AT4G34990	Symbols: AtMYB32 | AtMYB32 (myb domain protein 32); DNA binding / transcription factor | chr4:16661375-16662294 REVERSE	4113.74	5068.06
Brapa_ESTC016952	AT3G24880	| Symbols: | DNA binding | chr3:9086464-9095544 REVERSE	7851.86	5060.66
Brapa_ESTC006946	AT4G02640	Symbols: ATBZIP10, BZO2H1 | BZO2H1 (basic leucine zipper O2 homolog 1); DNA binding / transcription factor | chr4:1154031-1156085 FORWARD	3916.4	5042.24
Brapa_ESTC014781	AT2G36270	Symbols: GIA1, ABI5 | ABI5 (ABA INSENSITIVE 5); DNA binding / transcription factor/ transcriptional activator | chr2:15212059-15213650 REVERSE	5919.85	5023.94
Brapa_ESTC026883	AT4G28610	Symbols: ATPHR1, PHR1 | PHR1 (PHOSPHATE STARVATION RESPONSE 1); transcription factor | chr4:14133170-14134957 REVERSE	6649.6	5000.82
Brapa_ESTC007020	AT5G60410	Symbols: ATSIZ1, SIZ1 | ATSIZ1/SIZ1; DNA binding | chr5:24312452-24318056 FORWARD	6522.15	4997.51
Brapa_ESTC043597	AT3G53340	Symbols: | CCAAT-box binding transcription factor, putative | chr3:19785360-19786969 REVERSE	4739.85	4992.39
Brapa_ESTC003792	AT5G13820	Symbols: ATBP-1, ATBP1, ATTBP1, HPPBF-1, TBP1 | TBP1 (TELOMERIC DNA BINDING PROTEIN 1); DNA binding | chr5:4461697-4464358 FORWARD	1700.77	4989.37
Brapa_ESTC008996	AT5G08130	Symbols: BIM1 | BIM1 (BES1-interacting Myc-like protein 1); DNA binding / transcription factor | chr5:2606656-2608653 REVERSE	8217.56	4968.7
Brapa_ESTC038461	AT5G25890	Symbols: IAR2, IAA28 | IAA28 (IAA-ALANINE RESISTANT 2); transcription factor | chr5:9033483-9034557 FORWARD	2428.98	4967.27
Brapa_ESTC016587	AT1G55300	| Symbols: | transcription factor | chr1:20631821-20633157 REVERSE	2802.49	4965.35
Brapa_ESTC000418	AT5G47370	Symbols: HAT2 | HAT2; transcription factor | chr5:19233709-19234874 REVERSE	5527.1	4962.88
Brapa_ESTC022611	AT5G17300	Symbols: | myb family transcription factor | chr5:5690437-5692437 REVERSE	3986.94	4957.13
Brapa_ESTC031285	AT5G47230	Symbols: ATERF-5, ATERF5, ERF5 | ERF5 (ETHYLENE RESPONSIVE ELEMENT BINDING FACTOR 5); DNA binding / transcription factor/ transcriptional activator | chr5:19197299-19198201 FORWARD	2517.4	4950.01
Brapa_ESTC029319	AT3G09230	Symbols: AtMYB1, ATMYB1 | ATMYB1 (myb domain protein 1); DNA binding / transcription factor | chr3:2833466-2835140 FORWARD	6333.27	4944.17
Brapa_ESTC010132	AT4G17460	Symbols: HAT1 | HAT1 (homeobox-leucine zipper protein 1); DNA binding / transcription factor | chr4:9739874-9740995 FORWARD	4734.61	4934.05
Brapa_ESTC011725	AT3G15210	Symbols: ATERF-4, ERF4, RAP2.5, ATERF4 | ATERF-4/ATERF4/ERF4/RAP2.5 (ETHYLENE RESPONSIVE ELEMENT BINDING FACTOR 4); DNA binding / protein binding / transcription factor/ transcriptional repressor | chr3:5121479-5122147 FORWARD	9790.98	4907.47
Brapa_ESTC022740	AT1G51950	Symbols: IAA18 | IAA18 (indoleacetic acid-induced protein 18); transcription factor | chr1:19309339-19310799 FORWARD	3900.33	4826.26
Brapa_ESTC001915	AT4G40060	Symbols: ATHB16 | ATHB16 (ARABIDOPSIS THALIANA HOMEOBOX PROTEIN 13); transcription factor | chr4:18571676-18572768 REVERSE	6333.79	4822.21
Brapa_ESTC026636	AT5G44080	Symbols: | bZIP transcription factor family protein | chr5:17756014-17756961 REVERSE	3587.29	4797.2
Brapa_ESTC011853	AT5G52660	Symbols: | myb family transcription factor | chr5:21376649-21379263 REVERSE	5967.39	4770.63
Brapa_ESTC029020	AT3G54620	Symbols: ATBZIP25, BZO2H4 | BZO2H4 (basic leucine zipper O2 homolog 4); transcription factor | chr3:20229063-20231319 REVERSE	13958.6	4764.15
Brapa_ESTC006857	AT2G18280	Symbols: AtTLP2 | AtTLP2 (TUBBY LIKE PROTEIN 2); phosphoric diester hydrolase/ transcription factor | chr2:7953836-7955258 FORWARD	3308.14	4751.63
Brapa_ESTC024675	AT3G56980	Symbols: ORG3 | ORG3 (OBP3-responsive gene 3); DNA binding / transcription factor | chr3:21097591-21098473 REVERSE	4298.33	4749.51
Brapa_ESTC032944	AT4G30935	Symbols: ATWRKY32, WRKY32 | WRKY32 (WRKY DNA-binding protein 32); transcription factor | chr4:15051922-15053914 REVERSE	7540.43	4744.47
Brapa_ESTC014037	AT2G24790	Symbols: COL3 | COL3 (CONSTANS-LIKE 3); protein binding / transcription factor/ zinc ion binding | chr2:10574038-10575025 FORWARD	4637.21	4733.52
Brapa_ESTC024500	AT4G37180	Symbols: | myb family transcription factor | chr4:17504642-17506101 FORWARD	6913.08	4715.43
Brapa_ESTC034152	AT4G37180	Symbols: | myb family transcription factor | chr4:17504642-17506101 FORWARD	6161.45	4708.03
Brapa_ESTC026584	AT3G19184	| Symbols: | DNA binding | chr3:6637561-6639041 FORWARD	6239.44	4692.91
Brapa_ESTC020465	AT4G34990	Symbols: AtMYB32 | AtMYB32 (myb domain protein 32); DNA binding / transcription factor | chr4:16661375-16662294 REVERSE	5174.31	4690.36
Brapa_ESTC020300	AT5G12840	Symbols: EMB2220, HAP2, ATHAP2A | HAP2A (EMBRYO DEFECTIVE 2220); transcription factor | chr5:4051150-4052964 REVERSE	2215.02	4690.02
Brapa_ESTC021623	AT3G02150	Symbols: TCP13, TFPD, PTF1 | PTF1 (PLASTID transcription factor 1); transcription factor | chr3:391529-392596 FORWARD	4482.86	4688.17
Brapa_ESTC012486	AT1G32130	Symbols: | similar to IWS1 C-terminus family protein [Arabidopsis thaliana] (TAIR:AT4G19000.1); similar to Os01g0147200 [Oryza sativa (japonica cultivar-group)] (GB:NP_001042011.1); similar to unnamed protein product [Ostreococcus tauri] (GB:CAL53710.1); contains InterPro domain IWS1, C-terminal; (InterPro:IPR008654); contains InterPro domain transcription factors TFIIS, elongin A, CRSP70, conser…	8182.9	4676.54
Brapa_ESTC011826	AT4G32040	Symbols: KNAT5 | KNAT5 (KNOTTED1-LIKE HOMEOBOX GENE 5); transcription factor | chr4:15494133-15496015 FORWARD	10326.3	4676.03
Brapa_ESTC023067	AT5G05090	Symbols: | myb family transcription factor | chr5:1503394-1504194 FORWARD	7149.19	4673.15
Brapa_ESTC014666	AT1G06180	Symbols: AtMYBlfgn, AtMYB13, ATMYB13 | ATMYB13 (myb domain protein 13); DNA binding / transcription factor | chr1:1889509-1891088 FORWARD	2332.92	4669.9
Brapa_ESTC035553	AT3G56400	Symbols: ATWRKY70, WRKY70 | WRKY70 (WRKY DNA-binding protein 70); transcription factor | chr3:20920061-20921388 REVERSE	1449.12	4656.95
Brapa_ESTC012631	AT3G15540	Symbols: MSG2, IAA19 | IAA19 (indoleacetic acid-induced protein 19); transcription factor | chr3:5264107-5265385 FORWARD	4365.49	4654.99
Brapa_ESTC005652	AT3G15790	Symbols: MBD11 | MBD11 (methyl-CpG-binding domain 11); DNA binding | chr3:5343216-5344393 FORWARD	2505.56	4638.29
Brapa_ESTC039405	AT1G08970	Symbols: HAP5C | HAP5C (HEME ACTIVATED PROTEIN 5C); DNA binding / transcription factor | chr1:2883147-2883842 FORWARD	9772.74	4615.22
Brapa_ESTC022597	AT5G59780	Symbols: AtMYB59, MYB59 | MYB59 (myb domain protein 59); DNA binding / transcription factor | chr5:24099651-24100481 REVERSE	1908.41	4610.44
Brapa_ESTC010515	AT4G37180	Symbols: | myb family transcription factor | chr4:17504642-17506101 FORWARD	6062.77	4581.68
Brapa_ESTC014228	AT5G18680	Symbols: AtTLP11 | AtTLP11 (TUBBY LIKE PROTEIN 11); phosphoric diester hydrolase/ transcription factor | chr5:6228360-6230428 REVERSE	7891.37	4578.92
Brapa_ESTC012202	AT4G16780	Symbols: HAT4, ATHB2, ATHB-2 | ATHB-2 (Homeobox-leucine zipper protein HAT4); DNA binding / transcription factor | chr4:9449310-9450623 FORWARD	9659.66	4566.09
Brapa_ESTC021241	AT1G28310	| Symbols: | DNA binding | chr1:9912521-9913672 REVERSE	5309.88	4557.14
Brapa_ESTC006725	AT5G44190	Symbols: ATGLK2, GPRI2, GLK2 | GLK2 (GOLDEN2-LIKE 2); DNA binding / transcription factor | chr5:17815662-17817874 FORWARD	2670.53	4551.1
Brapa_ESTC027906	AT1G76900	Symbols: AtTLP1 | AtTLP1 (TUBBY LIKE PROTEIN 1); phosphoric diester hydrolase/ transcription factor | chr1:28887635-28889271 FORWARD	6181.1	4550.3
Brapa_ESTC022012	AT1G04550	Symbols: BDL, IAA12 | IAA12 (AUXIN-INDUCED PROTEIN 12); transcription factor | chr1:1240581-1241809 FORWARD	2590.12	4544.64
Brapa_ESTC002201	AT5G59820	Symbols: ZAT12, RHL41 | RHL41 (RESPONSIVE TO HIGH LIGHT 41); nucleic acid binding / transcription factor/ zinc ion binding | chr5:24120299-24120787 FORWARD	3333.69	4541.28
Brapa_ESTC046694	AT5G65670	Symbols: IAA9 | IAA9 (indoleacetic acid-induced protein 9); transcription factor | chr5:26271689-26273360 FORWARD	5916.86	4528.48
Brapa_ESTC031015	AT1G21450	Symbols: SCL1 | SCL1 (SCARECROW-LIKE 1); transcription factor | chr1:7509710-7511491 FORWARD	5248.51	4526.41
Brapa_ESTC000406	AT1G27730	Symbols: ZAT10, STZ | STZ (SALT TOLERANCE ZINC FINGER); nucleic acid binding / transcription factor/ zinc ion binding | chr1:9648289-9648972 REVERSE	5557.78	4498.93
Brapa_ESTC023257	AT3G51910	Symbols: HSFA7A, AT-HSFA7A | AT-HSFA7A (Arabidopsis thaliana heat shock transcription factor A7A); DNA binding / transcription factor | chr3:19276272-19277597 FORWARD	2077.06	4480.76
Brapa_ESTC016314	AT1G08970	Symbols: HAP5C | HAP5C (HEME ACTIVATED PROTEIN 5C); DNA binding / transcription factor | chr1:2883147-2883842 FORWARD	3107.5	4463.98
Brapa_ESTC000947	AT1G53170	Symbols: ATERF-8, ATERF8 | ATERF-8/ATERF8 (ETHYLENE RESPONSE ELEMENT BINDING FACTOR 4); DNA binding / transcription factor/ transcriptional repressor | chr1:19825207-19825764 REVERSE	1073.8	4450.03
Brapa_ESTC008935	AT3G21430	| Symbols: | DNA binding | chr3:7544806-7552847 REVERSE	7768.99	4440.64
Brapa_ESTC048721	AT4G36740	Symbols: ATHB40 | ATHB40 (ARABIDOPSIS THALIANA HOMEOBOX PROTEIN 40); DNA binding / transcription factor | chr4:17314653-17316318 REVERSE	4176.84	4402.78
Brapa_ESTC012447	AT4G24660	Symbols: ATHB22, MEE68 | ATHB22/MEE68 (ARABIDOPSIS THALIANA HOMEOBOX PROTEIN 22, maternal effect embryo arrest 68); DNA binding / transcription factor | chr4:12724861-12725523 REVERSE	1130.97	4400.22
Brapa_ESTC020809	AT5G15210	Symbols: ATHB30, ZFHD3 | ATHB30/ZFHD3 (ZINC FINGER HOMEODOMAIN 3); DNA binding / transcription factor | chr5:4937877-4938692 REVERSE	5841.82	4394.8
Brapa_ESTC035319	AT1G25580	Symbols: ANAC008 | ANAC008 (Arabidopsis NAC domain containing protein 8); transcription factor | chr1:8997051-8999587 REVERSE	1505.16	4380.92
Brapa_ESTC029013	AT1G26580	Symbols: | similar to myb family transcription factor / ELM2 domain-containing protein [Arabidopsis thaliana] (TAIR:AT2G03470.1); similar to Os03g0425800 [Oryza sativa (japonica cultivar-group)] (GB:NP_001050406.1); similar to expressed protein [Oryza sativa (japonica cultivar-group)] (GB:AAS07212.1) | chr1:9185607-9187200 FORWARD	138.987	4359.39
Brapa_ESTC021842	AT3G24520	Symbols: HSFC1, AT-HSFC1 | AT-HSFC1 (Arabidopsis thaliana heat shock transcription factor C1); DNA binding / transcription factor | chr3:8941462-8942538 FORWARD	3960.71	4347.84
Brapa_ESTC011566	AT5G04240	Symbols: ELF6 | ELF6 (EARLY FLOWERING 6); transcription factor | chr5:1169545-1174639 FORWARD	3591.08	4346.55
Brapa_ESTC000229	AT4G38900	| Symbols: | DNA binding | chr4:18139558-18141514 REVERSE	812.252	4322.92
Brapa_ESTC045404	AT5G06710	Symbols: HAT14 | HAT14 (homeobox-leucine zipper protein 14); DNA binding / transcription factor | chr5:2068306-2070285 REVERSE	6969.45	4316.34
Brapa_ESTC004813	AT1G50420	Symbols: SCL3 | SCL3 (SCARECROW-LIKE 3); transcription factor | chr1:18681845-18683293 REVERSE	8558.57	4303.14
Brapa_ESTC009669	AT5G13180	Symbols: ANAC083 | ANAC083 (Arabidopsis NAC domain containing protein 83); transcription factor | chr5:4196646-4197580 FORWARD	4433.67	4300.8
Brapa_ESTC031996	AT4G25480	Symbols: CBF3, DREB1, DREB1A | DREB1A (DEHYDRATION RESPONSE ELEMENT B1A); DNA binding / transcription factor/ transcriptional activator | chr4:13018363-13019013 REVERSE	9360.06	4281.01
Brapa_ESTC016163	AT2G46870	Symbols: NGA1 | NGA1 (NGATHA1); transcription factor | chr2:19268382-19269314 FORWARD	3480.96	4277.47
Brapa_ESTC026362	AT4G29080	Symbols: IAA27, PAP2 | PAP2 (PHYTOCHROME-ASSOCIATED PROTEIN 2); transcription factor | chr4:14323671-14325219 REVERSE	1684.31	4271.78
Brapa_ESTC040586	AT1G76870	Symbols: | similar to transcription factor [Arabidopsis thaliana] (TAIR:AT1G21200.1); similar to expressed protein [Oryza sativa (japonica cultivar-group)] (GB:AAX95104.1); similar to Os11g0163500 [Oryza sativa (japonica cultivar-group)] (GB:NP_001065831.1); similar to Os12g0163500 [Oryza sativa (japonica cultivar-group)] (GB:NP_001066231.1); contains InterPro domain Homeodomain-like; (InterPro:I…	3553.71	4251.59
Brapa_ESTC015985	AT1G74430	Symbols: AtMYB95, AtMYBCP66, MYB95 | MYB95 (myb domain protein 95); DNA binding / transcription factor | chr1:27979070-27980779 FORWARD	3110.67	4232.9
Brapa_ESTC013230	AT5G13180	Symbols: ANAC083 | ANAC083 (Arabidopsis NAC domain containing protein 83); transcription factor | chr5:4196646-4197580 FORWARD	3548.8	4228.65
Brapa_ESTC038343	AT3G62100	Symbols: IAA30 | IAA30 (indoleacetic acid-induced protein 30); transcription factor | chr3:23006810-23007568 FORWARD	3162.3	4217.87
Brapa_ESTC046717	AT5G67580	Symbols: TRB2, ATTRB2 | ATTRB2/TRB2 (TELOMERE REPEAT BINDING FACTOR 2); DNA binding / transcription factor | chr5:26973069-26974299 REVERSE	3268.73	4191.91
Brapa_ESTC002035	AT1G28370	Symbols: ERF11, ATERF11 | ATERF11/ERF11 (ERF domain protein 11); DNA binding / transcription factor/ transcriptional repressor | chr1:9956337-9956837 REVERSE	3574.46	4177.83
Brapa_ESTC018257	AT3G25890	Symbols: | AP2 domain-containing transcription factor, putative | chr3:9477289-9478287 FORWARD	4327.31	4164.25
Brapa_ESTC038596	AT4G28610	Symbols: ATPHR1, PHR1 | PHR1 (PHOSPHATE STARVATION RESPONSE 1); transcription factor | chr4:14133170-14134957 REVERSE	6812.04	4164.08
Brapa_ESTC012488	AT5G58900	Symbols: | myb family transcription factor | chr5:23800501-23801893 REVERSE	1389.88	4162.31
Brapa_ESTC030655	AT4G26110	Symbols: NAP1;1 | NAP1;1 (NUCLEOSOME ASSEMBLY PROTEIN1;1); DNA binding | chr4:13232721-13235511 FORWARD	3252.93	4142.84
Brapa_ESTC047556	AT3G11280	Symbols: | myb family transcription factor | chr3:3533483-3534399 REVERSE	6493.42	4142.19
Brapa_ESTC024336	AT3G49530	Symbols: ANAC062 | ANAC062 (Arabidopsis NAC domain containing protein 62); transcription factor | chr3:18373624-18375702 REVERSE	10403.2	4136.68
Brapa_ESTC014199	AT5G13180	Symbols: ANAC083 | ANAC083 (Arabidopsis NAC domain containing protein 83); transcription factor | chr5:4196646-4197580 FORWARD	5546.86	4128.05
Brapa_ESTC012342	AT5G46750	Symbols: AGD8 | AGD8 (ARF-GAP DOMAIN 8); DNA binding | chr5:18987177-18989044 REVERSE	5209.39	4105.25
Brapa_ESTC021292	AT1G21910	Symbols: | AP2 domain-containing transcription factor family protein | chr1:7696644-7697336 FORWARD	6326.8	4095.73
Brapa_ESTC001617	AT1G78080	Symbols: RAP2.4 | RAP2.4 (related to AP2 4); DNA binding / transcription factor | chr1:29369683-29370687 FORWARD	5209.74	4095.73
Brapa_ESTC002264	AT1G27730	Symbols: ZAT10, STZ | STZ (SALT TOLERANCE ZINC FINGER); nucleic acid binding / transcription factor/ zinc ion binding | chr1:9648289-9648972 REVERSE	3934.22	4091.9
Brapa_ESTC018748	AT5G41410	Symbols: BEL1 | BEL1 (BELL 1); DNA binding / transcription factor | chr5:16597652-16600998 FORWARD	3378.27	4088.19
Brapa_ESTC041526	AT2G30250	Symbols: ATWRKY25, WRKY25 | WRKY25 (WRKY DNA-binding protein 25); transcription factor | chr2:12910630-12912166 REVERSE	13843.8	4069.42
Brapa_ESTC033376	AT5G11060	Symbols: KNAT4 | KNAT4 (KNOTTED1-LIKE HOMEOBOX GENE 4); transcription factor | chr5:3510409-3512968 FORWARD	5206.99	4049.33
Brapa_ESTC013539	AT2G23790	Symbols: | similar to transcription factor [Arabidopsis thaliana] (TAIR:AT4G36820.1); similar to Os10g0501500 [Oryza sativa (japonica cultivar-group)] (GB:NP_001064986.1); similar to Protein of unknown function DUF607 [Medicago truncatula] (GB:ABE78504.1); similar to Os03g0233000 [Oryza sativa (japonica cultivar-group)] (GB:NP_001049472.1); contains InterPro domain Protein of unknown function DUF…	4042.19	4038.09
Brapa_ESTC043678	AT3G54320	Symbols: WRI, ASML1, WRI1 | WRI1 (WRINKLED 1); DNA binding / transcription factor | chr3:20125787-20129451 FORWARD	6229.66	4026.46
Brapa_ESTC005968	AT3G11100	| Symbols: | transcription factor | chr3:3476496-3477326 REVERSE	3850.64	4024.32
Brapa_ESTC030525	AT1G66350	Symbols: RGL, RGL1 | RGL1 (RGA-LIKE 1); transcription factor | chr1:24751990-24753525 FORWARD	4182.01	4015.58
Brapa_ESTC025309	AT2G23740	Symbols: | nucleic acid binding / transcription factor/ zinc ion binding | chr2:10105293-10110309 FORWARD	3024.04	4014.78
Brapa_ESTC045005	AT4G34340	Symbols: | similar to unknown protein [Arabidopsis thaliana] (TAIR:AT5G15570.1); similar to Bromodomain associated family protein, expressed [Oryza sativa (japonica cultivar-group)] (GB:ABA98992.1); similar to Os12g0574800 [Oryza sativa (japonica cultivar-group)] (GB:NP_001067103.1); contains InterPro domain Bromodomain transcription factor; (InterPro:IPR006565); contains InterPro domain Histone-…	2849.21	4007.14
Brapa_ESTC026165	AT1G79350	Symbols: EMB1135 | EMB1135 (EMBRYO DEFECTIVE 1135); DNA binding | chr1:29849722-29858108 REVERSE	4019.69	4001.99
Brapa_ESTC044184	AT4G18880	Symbols: HSFA4A, AT-HSFA4A | AT-HSFA4A (Arabidopsis thaliana heat shock transcription factor A4A); DNA binding / transcription factor | chr4:10347780-10349062 REVERSE	4159.83	3980.35
Brapa_ESTC031995	AT4G25470	Symbols: DREB1C, FTQ4, CBF2 | CBF2 (FREEZING TOLERANCE QTL 4); DNA binding / transcription factor/ transcriptional activator | chr4:13015446-13016096 REVERSE	6103.37	3967.06
Brapa_ESTC037693	AT1G08810	Symbols: AtMYB60, MYB60 | MYB60 (myb domain protein 60); DNA binding / transcription factor | chr1:2819282-2820332 REVERSE	1771.43	3958.09
Brapa_ESTC044623	AT4G29230	Symbols: ANAC075 | ANAC075 (Arabidopsis NAC domain containing protein 75); transcription factor | chr4:14410344-14414962 FORWARD	4265.64	3944.49
Brapa_ESTC002812	AT3G54320	Symbols: WRI, ASML1, WRI1 | WRI1 (WRINKLED 1); DNA binding / transcription factor | chr3:20125787-20129451 FORWARD	2275.1	3923.77
Brapa_ESTC012187	AT5G65670	Symbols: IAA9 | IAA9 (indoleacetic acid-induced protein 9); transcription factor | chr5:26271689-26273360 FORWARD	6734.05	3920.86
Brapa_ESTC031194	AT4G20400	Symbols: | transcription factor jumonji (jmj) family protein / zinc finger (C5HC2 type) family protein | chr4:11009764-11013599 FORWARD	4324.93	3918.09
Brapa_ESTC022374	AT1G08465	Symbols: YAB2 | YAB2 (YABBY 2); transcription factor | chr1:2676030-2679385 FORWARD	3771.21	3872.1
Brapa_ESTC023613	AT4G38910	Symbols: BPC5, BBR/BPC5, ATBPC5 | ATBPC5/BBR/BPC5/BPC5 (BASIC PENTACYSTEINE 5); DNA binding / transcription factor | chr4:18144519-18146465 REVERSE	3419.14	3862.5
Brapa_ESTC042898	AT3G12480	Symbols: | transcription factor, putative | chr3:3958072-3960285 FORWARD	2256.71	3858.38
Brapa_ESTC021872	AT1G50420	Symbols: SCL3 | SCL3 (SCARECROW-LIKE 3); transcription factor | chr1:18681845-18683293 REVERSE	7120.79	3850.07
Brapa_ESTC017403	AT3G05545	Symbols: | transcription factor, putative / zinc finger (C3HC4 type RING finger) family protein | chr3:1609442-1612139 FORWARD	6114.89	3836.69
Brapa_ESTC024608	AT3G16857	Symbols: ARR1 | ARR1 (ARABIDOPSIS RESPONSE REGULATOR 1); transcription factor/ two-component response regulator | chr3:5756119-5759145 FORWARD	4728.13	3831.48
Brapa_ESTC009536	AT4G36540	Symbols: BEE2 | BEE2 (BR ENHANCED EXPRESSION 2); DNA binding / transcription factor | chr4:17243702-17244968 FORWARD	2034.07	3826.53
Brapa_ESTC034001	AT1G01150	Symbols: | DNA binding / zinc ion binding | chr1:70115-71998 REVERSE	3470.09	3815.23
Brapa_ESTC013968	AT2G42380	Symbols: | bZIP transcription factor family protein | chr2:17654283-17655738 REVERSE	2716	3802.7
Brapa_ESTC009654	AT4G02590	Symbols: UNE12 | UNE12 (unfertilized embryo sac 12); DNA binding | chr4:1137968-1140306 REVERSE	3083.67	3781.18
Brapa_ESTC022501	AT1G04550	Symbols: BDL, IAA12 | IAA12 (AUXIN-INDUCED PROTEIN 12); transcription factor | chr1:1240581-1241809 FORWARD	1597.01	3768.75
Brapa_ESTC029743	AT3G50890	Symbols: ATHB28 | ATHB28 (ARABIDOPSIS THALIANA HOMEOBOX PROTEIN 28); DNA binding / transcription factor | chr3:18927401-18928150 FORWARD	1744.37	3753.78
Brapa_ESTC031998	AT4G25470	Symbols: DREB1C, FTQ4, CBF2 | CBF2 (FREEZING TOLERANCE QTL 4); DNA binding / transcription factor/ transcriptional activator | chr4:13015446-13016096 REVERSE	6839.74	3740.94
Brapa_ESTC022482	AT3G10330	Symbols: | transcription initiation factor IIB-2 / general transcription factor TFIIB-2 (TFIIB2) | chr3:3199912-3201647 FORWARD	5367.52	3738.81
Brapa_ESTC009391	AT3G27260	Symbols: GTE8 | GTE8 (GLOBAL transcription factor GROUP E8); DNA binding | chr3:10069648-10073640 FORWARD	9545.2	3721.66
Brapa_ESTC008918	AT2G02080	Symbols: ATIDD4 | ATIDD4 (ARABIDOPSIS THALIANA INDETERMINATE(ID)-DOMAIN 4); transcription factor | chr2:518327-521169 REVERSE	7844.63	3714.47
Brapa_ESTC032004	AT4G25490	Symbols: DREB1B, CBF1 | CBF1 (C-REPEAT/DRE BINDING FACTOR 1); DNA binding / transcription factor/ transcriptional activator | chr4:13021931-13022572 REVERSE	8309.11	3711.1
Brapa_ESTC030658	AT1G06070	Symbols: | bZIP transcription factor, putative (bZIP69) | chr1:1835200-1837115 REVERSE	7381.9	3708.79
Brapa_ESTC011775	AT3G05545	Symbols: | transcription factor, putative / zinc finger (C3HC4 type RING finger) family protein | chr3:1609442-1612139 FORWARD	3990.49	3697.28
Brapa_ESTC008548	AT2G18160	Symbols: ATBZIP2, GBF5 | GBF5 (G-box binding factor 5); DNA binding / transcription factor | chr2:7905370-7905885 REVERSE	2815.52	3695.66
Brapa_ESTC026452	AT2G46020	Symbols: ATBRM, CHR2, BRM | ATBRM/CHR2 (ARABIDOPSIS THALIANA BRAHMA); ATP binding / DNA binding / helicase/ transcription regulator | chr2:18930377-18938842 FORWARD	5783.42	3688.28
Brapa_ESTC045146	AT4G38910	Symbols: BPC5, BBR/BPC5, ATBPC5 | ATBPC5/BBR/BPC5/BPC5 (BASIC PENTACYSTEINE 5); DNA binding / transcription factor | chr4:18144519-18146465 REVERSE	4907.44	3685.18
Brapa_ESTC027849	AT2G01060	Symbols: | myb family transcription factor | chr2:73456-74902 REVERSE	8433.88	3681.24
Brapa_ESTC046392	AT5G56860	Symbols: GNC | GNC (GATA, NITRATE-INDUCIBLE, CARBON METABOLISM-INVOLVED); transcription factor | chr5:23006856-23008577 REVERSE	2447.44	3679.14
Brapa_ESTC019522	AT2G02450	Symbols: ANAC034, ANAC035 | ANAC034/ANAC035 (Arabidopsis NAC domain containing protein 34, Arabidopsis NAC domain containing protein 35); transcription factor | chr2:648043-650648 FORWARD	4471.35	3675.92
Brapa_ESTC023968	AT5G24120	Symbols: SIG5, SIGE | SIGE (RNA polymerase sigma subunit E); DNA binding / DNA-directed RNA polymerase/ sigma factor/ transcription factor | chr5:8157797-8159749 REVERSE	2310.1	3669.67
Brapa_ESTC033441	AT3G09250	| Symbols: | DNA binding / nuclease | chr3:2839086-2840300 FORWARD	1434.72	3669.15
Brapa_ESTC007392	AT1G20980	Symbols: FBR6, SPL1R2, ATSPL14, SPL14 | SPL14 (SQUAMOSA PROMOTER BINDING PROTEIN-LIKE 14); DNA binding / transcription factor | chr1:7325031-7328922 FORWARD	10806.4	3652.89
Brapa_ESTC012416	AT1G09060	| Symbols: | transcription factor | chr1:2921238-2925257 REVERSE	3949.14	3644.5
Brapa_ESTC032098	AT5G09250	Symbols: KIWI | KIWI; DNA binding / transcription coactivator | chr5:2875422-2876369 REVERSE	1328.36	3643.84
Brapa_ESTC010214	AT2G27470	Symbols: | CCAAT-box binding transcription factor subunit HAP3-related | chr2:11752274-11753453 REVERSE	3470.29	3641.64
Brapa_ESTC027546	AT4G00480	Symbols: MYC1, ATMYC1 | ATMYC1 (Arabidopsis thaliana myc-related transcription factor 1); DNA binding / transcription factor | chr4:217106-219684 REVERSE	685.621	3633.71
Brapa_ESTC036524	AT3G15030	Symbols: MEE35, TCP4 | TCP4 (TCP family transcription factor 4, maternal effect embryo arrest 35); transcription factor | chr3:5062315-5063577 FORWARD	8497.85	3633.64
Brapa_ESTC047973	AT3G61630	Symbols: CRF6 | CRF6 (CYTOKININ RESPONSE FACTOR 6); DNA binding / transcription factor | chr3:22816249-22817196 FORWARD	5553.26	3618.97
Brapa_ESTC025234	AT1G55300	| Symbols: | transcription factor | chr1:20631821-20633157 REVERSE	2659.86	3614.54
Brapa_ESTC015023	AT3G21270	Symbols: ADOF2 | ADOF2 (Arabidopsis dof zinc finger protein 2); DNA binding / transcription factor | chr3:7474940-7475554 FORWARD	2897.62	3612.4
Brapa_ESTC025584	AT1G28560	Symbols: SRD2 | SRD2 (SHOOT REDIFFERENTIATION DEFECTIVE 2); DNA binding | chr1:10038183-10040368 REVERSE	1379.82	3602.95
Brapa_ESTC031306	AT1G64000	Symbols: ATWRKY56, WRKY56 | WRKY56 (WRKY DNA-binding protein 56); transcription factor | chr1:23751097-23752546 FORWARD	2089.86	3600.8
Brapa_ESTC044090	AT4G16420	Symbols: PRZ1, ADA2B | ADA2B (PROPORZ1); DNA binding / transcription factor | chr4:9262828-9265798 REVERSE	2361.46	3596.92
Brapa_ESTC033592	AT2G44730	| Symbols: | transcription factor | chr2:18444522-18445640 REVERSE	2598.83	3592.01
Brapa_ESTC043259	AT3G22220	Symbols: | DNA binding / protein dimerization | chr3:7839815-7842365 REVERSE	5517.32	3590.84
Brapa_ESTC007666	AT2G23790	Symbols: | similar to transcription factor [Arabidopsis thaliana] (TAIR:AT4G36820.1); similar to Os10g0501500 [Oryza sativa (japonica cultivar-group)] (GB:NP_001064986.1); similar to Protein of unknown function DUF607 [Medicago truncatula] (GB:ABE78504.1); similar to Os03g0233000 [Oryza sativa (japonica cultivar-group)] (GB:NP_001049472.1); contains InterPro domain Protein of unknown function DUF…	8178.73	3588.31
Brapa_ESTC044362	AT4G22140	| Symbols: | DNA binding | chr4:11728105-11730242 REVERSE	1134.93	3572.55
Brapa_ESTC018961	AT1G76900	Symbols: AtTLP1 | AtTLP1 (TUBBY LIKE PROTEIN 1); phosphoric diester hydrolase/ transcription factor | chr1:28887635-28889271 FORWARD	6337.1	3570.2
Brapa_ESTC008868	AT4G40060	Symbols: ATHB16 | ATHB16 (ARABIDOPSIS THALIANA HOMEOBOX PROTEIN 13); transcription factor | chr4:18571676-18572768 REVERSE	4498.82	3566.98
Brapa_ESTC003706	AT1G75390	Symbols: ATBZIP44 | bZIP transcription factor family protein | chr1:28295885-28296406 FORWARD	5726.64	3563.23
Brapa_ESTC035637	AT5G04290	Symbols: | KOW domain-containing transcription factor family protein | chr5:1196070-1202654 FORWARD	2083.35	3539.9
Brapa_ESTC015950	AT5G04410	Symbols: ANAC078, NAC2 | NAC2 (Arabidopsis NAC domain containing protein 78); transcription factor | chr5:1243981-1246417 FORWARD	7229.99	3536.38
Brapa_ESTC033892	AT5G04290	Symbols: | KOW domain-containing transcription factor family protein | chr5:1196070-1202654 FORWARD	2550.71	3532.11
Brapa_ESTC039097	AT5G49330	Symbols: AtMYB111 | AtMYB111 (myb domain protein 111); DNA binding / transcription factor | chr5:20016373-20018519 REVERSE	627.788	3525.31
Brapa_ESTC024906	AT2G31230	Symbols: ATERF15 | ATERF15 (ETHYLENE-RESPONSIVE ELEMENT BINDING FACTOR 15); DNA binding / transcription factor/ transcriptional activator | chr2:13313753-13314484 REVERSE	611.615	3523.45
Brapa_ESTC025847	AT5G08130	Symbols: BIM1 | BIM1 (BES1-interacting Myc-like protein 1); DNA binding / transcription factor | chr5:2606656-2608653 REVERSE	280.473	3517.45
Brapa_ESTC023197	AT4G02590	Symbols: UNE12 | UNE12 (unfertilized embryo sac 12); DNA binding | chr4:1137968-1140306 REVERSE	4011.21	3513.48
Brapa_ESTC049715	AT5G62470	Symbols: mybcov1, AtMYB96, MYB96 | MYB96 (myb domain protein 96); DNA binding / transcription factor | chr5:25096660-25098084 REVERSE	3716.37	3512.8
Brapa_ESTC038413	AT4G17050	| Symbols: | transcription factor | chr4:9589681-9592432 FORWARD	618.402	3501.22
Brapa_ESTC018941	AT1G32130	Symbols: | similar to IWS1 C-terminus family protein [Arabidopsis thaliana] (TAIR:AT4G19000.1); similar to Os01g0147200 [Oryza sativa (japonica cultivar-group)] (GB:NP_001042011.1); similar to unnamed protein product [Ostreococcus tauri] (GB:CAL53710.1); contains InterPro domain IWS1, C-terminal; (InterPro:IPR008654); contains InterPro domain transcription factors TFIIS, elongin A, CRSP70, conser…	6622.16	3497.95
Brapa_ESTC039680	AT1G19220	Symbols: IAA22, ARF11, ARF19 | ARF19 (AUXIN RESPONSE FACTOR 11); transcription factor | chr1:6628386-6632770 REVERSE	4084.79	3496.61
Brapa_ESTC007892	AT1G55110	Symbols: ATIDD7, ARABIDOPSIS THALIANA INDETERMINATE(ID)-DOMAIN 7 | ARABIDOPSIS THALIANA INDETERMINATE(ID)-DOMAIN 7/ATIDD7; nucleic acid binding / transcription factor/ zinc ion binding | chr1:20564073-20566292 REVERSE	1529.87	3483.66
Brapa_ESTC004104	AT3G12560	Symbols: ATTBP2, TRFL9 | TRFL9 (TRF-LIKE 9); DNA binding | chr3:3982279-3984855 REVERSE	1651.41	3480.81
Brapa_ESTC027689	AT5G07580	Symbols: | DNA binding / transcription factor | chr5:2399526-2400350 FORWARD	3718.12	3480.72
Brapa_ESTC037616	AT5G21120	Symbols: EIL2 | EIL2 (ETHYLENE-INSENSITIVE3-LIKE 2); transcription factor | chr5:7182632-7184188 FORWARD	1407.97	3479.26
Brapa_ESTC019840	AT2G30250	Symbols: ATWRKY25, WRKY25 | WRKY25 (WRKY DNA-binding protein 25); transcription factor | chr2:12910630-12912166 REVERSE	12109.3	3478.17
Brapa_ESTC022797	AT4G14550	Symbols: SLR, IAA14 | IAA14 (SOLITARY ROOT); transcription factor | chr4:8348517-8349919 REVERSE	2862.29	3475.55
Brapa_ESTC004477	AT3G21270	Symbols: ADOF2 | ADOF2 (Arabidopsis dof zinc finger protein 2); DNA binding / transcription factor | chr3:7474940-7475554 FORWARD	1156.02	3473.41
Brapa_ESTC022533	AT5G60850	Symbols: OBP4 | OBP4 (OBF BINDING PROTEIN 4); DNA binding / transcription factor | chr5:24497804-24498727 FORWARD	3362.73	3468.08
Brapa_ESTC036571	AT1G55520	Symbols: ATTBP2 | TBP2 (TATA binding protein 2); DNA binding / RNA polymerase II transcription factor | chr1:20729816-20731149 REVERSE	2174.15	3461.75
Brapa_ESTC011812	AT5G47220	Symbols: ATERF2, ATERF-2, ERF2 | ATERF-2/ATERF2/ERF2 (ETHYLENE RESPONSE FACTOR 2); DNA binding / transcription factor/ transcriptional activator | chr5:19189250-19189981 REVERSE	3457.92	3452.24
Brapa_ESTC004464	AT2G01060	Symbols: | myb family transcription factor | chr2:73456-74902 REVERSE	5540.57	3445.93
Brapa_ESTC045723	AT5G15650	Symbols: REVERSIBLY GLYCOSYLATED POLYPEPTIDE 2, RGP2 | RGP2 (Reversibly glycosylated polypeptide-3); DNA binding / alpha-1,4-glucan-protein synthase (UDP-forming) | chr5:5092206-5094096 FORWARD	5363.84	3442.13
Brapa_ESTC026447	AT5G67580	Symbols: TRB2, ATTRB2 | ATTRB2/TRB2 (TELOMERE REPEAT BINDING FACTOR 2); DNA binding / transcription factor | chr5:26973069-26974299 REVERSE	871.072	3430.63
Brapa_ESTC002545	AT3G23030	Symbols: IAA2 | IAA2 (indoleacetic acid-induced protein 2); transcription factor | chr3:8181076-8181692 REVERSE	2273.85	3426.48
Brapa_ESTC012307	AT1G50840	Symbols: POLGAMMA2 | POLGAMMA2 (polymerase gamma 2); DNA binding / DNA-directed DNA polymerase | chr1:18842945-18847981 FORWARD	2445.62	3424.74
Brapa_ESTC021248	AT5G47390	Symbols: | myb family transcription factor | chr5:19244228-19245773 FORWARD	8914.36	3408.68
Brapa_ESTC016562	AT5G44190	Symbols: ATGLK2, GPRI2, GLK2 | GLK2 (GOLDEN2-LIKE 2); DNA binding / transcription factor | chr5:17815662-17817874 FORWARD	1071.66	3398.53
Brapa_ESTC031349	AT4G04635	Symbols: | DNA binding / transposase | chr4:2347901-2349154 FORWARD	1054.58	3391.13
Brapa_ESTC005086	AT3G57660	Symbols: NRPA1 | NRPA1 (nuclear RNA polymerase A 1); DNA binding / DNA-directed RNA polymerase | chr3:21364723-21373791 FORWARD	7676.59	3389.24
Brapa_ESTC040718	AT1G79350	Symbols: EMB1135 | EMB1135 (EMBRYO DEFECTIVE 1135); DNA binding | chr1:29849722-29858108 REVERSE	3691.38	3382.38
Brapa_ESTC023485	AT5G28650	Symbols: ATWRKY74, WRKY74 | WRKY74 (WRKY DNA-binding protein 74); transcription factor | chr5:10677794-10678949 REVERSE	1258.48	3375.97
Brapa_ESTC036130	AT3G56850	Symbols: DPBF3, AREB3 | AREB3 (ABA-RESPONSIVE ELEMENT BINDING PROTEIN 3); DNA binding / transcription factor/ transcriptional activator | chr3:21057533-21058873 REVERSE	3252.01	3371.96
Brapa_ESTC011903	AT5G08520	Symbols: | myb family transcription factor | chr5:2755471-2757742 REVERSE	5944.97	3366.35
Brapa_ESTC017253	AT2G30250	Symbols: ATWRKY25, WRKY25 | WRKY25 (WRKY DNA-binding protein 25); transcription factor | chr2:12910630-12912166 REVERSE	15163.9	3358.69
Brapa_ESTC023609	AT1G15480	| Symbols: | DNA binding | chr1:5318302-5320417 FORWARD	3266.13	3352.08
Brapa_ESTC010831	AT1G24260	Symbols: AGL9, SEP3 | SEP3 (SEPALLATA3); transcription factor | chr1:8593779-8595851 REVERSE	1923.88	3346.49
Brapa_ESTC023491	AT2G45680	Symbols: | TCP family transcription factor, putative | chr2:18827791-18828861 REVERSE	3905.17	3342.71
Brapa_ESTC027269	AT2G24790	Symbols: COL3 | COL3 (CONSTANS-LIKE 3); protein binding / transcription factor/ zinc ion binding | chr2:10574038-10575025 FORWARD	4546.66	3338.1
Brapa_ESTC005472	AT3G17100	| Symbols: | transcription factor | chr3:5831558-5832250 FORWARD	2813.12	3335.71
Brapa_ESTC006452	AT2G41940	Symbols: ZFP8 | ZFP8 (ZINC FINGER PROTEIN 8); nucleic acid binding / transcription factor/ zinc ion binding | chr2:17514634-17515407 FORWARD	268.643	3322.53
Brapa_ESTC002881	AT2G16720	Symbols: AtMYB7, AtY49, MYB7 | MYB7 (myb domain protein 7); DNA binding / transcription factor | chr2:7262751-7263632 REVERSE	4323.27	3301.56
Brapa_ESTC003476	AT1G07480	Symbols: | transcription factor IIA large subunit / TFIIA large subunit (TFIIA-L) | chr1:2296703-2299212 REVERSE	4621.99	3283.09
Brapa_ESTC014744	AT4G17490	Symbols: ERF-6-6, ATERF6 | ATERF6 (ETHYLENE RESPONSIVE ELEMENT BINDING FACTOR 6); DNA binding / transcription factor | chr4:9752985-9753833 REVERSE	2319.87	3281.35
Brapa_ESTC043847	AT3G57600	Symbols: | AP2 domain-containing transcription factor, putative | chr3:21343818-21344651 FORWARD	1141.41	3278.76
Brapa_ESTC035696	AT4G15248	Symbols: | DNA binding / zinc ion binding | chr4:8708881-8709234 FORWARD	1490.6	3277.14
Brapa_ESTC001671	AT2G16770	Symbols: | DNA binding / transcription factor | chr2:7286941-7287899 FORWARD	4972.36	3275.7
Brapa_ESTC007103	AT1G69310	Symbols: ATWRKY57, WRKY57 | WRKY57 (WRKY DNA-binding protein 57); transcription factor | chr1:26059781-26061572 REVERSE	10485	3274.76
Brapa_ESTC005011	AT4G04635	Symbols: | DNA binding / transposase | chr4:2347901-2349154 FORWARD	9545.88	3273.01
Brapa_ESTC018772	AT3G16857	Symbols: ARR1 | ARR1 (ARABIDOPSIS RESPONSE REGULATOR 1); transcription factor/ two-component response regulator | chr3:5756119-5759145 FORWARD	5839.89	3263.94
Brapa_ESTC016407	AT3G13040	Symbols: | myb family transcription factor | chr3:4172422-4174463 REVERSE	2191.79	3255.64
Brapa_ESTC029133	AT1G62990	Symbols: IXR11, KNAT7 | KNAT7 (Knotted-like Arabidopsis thaliana); DNA binding / transcription factor | chr1:23341133-23344013 FORWARD	5120.58	3251.64
Brapa_ESTC034588	AT3G58120	Symbols: | bZIP transcription factor family protein | chr3:21532266-21534055 REVERSE	4203.47	3250.33
Brapa_ESTC020013	AT4G30410	| Symbols: | transcription factor | chr4:14871315-14871857 REVERSE	1323.51	3249.31
Brapa_ESTC031477	AT1G27000	Symbols: | bZIP family transcription factor | chr1:9374055-9376409 FORWARD	4302.05	3231.37
Brapa_ESTC013177	AT5G61590	Symbols: | AP2 domain-containing transcription factor family protein | chr5:24781879-24782484 REVERSE	2722.72	3229.21
Brapa_ESTC028724	AT4G13040	Symbols: | AP2 domain-containing transcription factor family protein | chr4:7614097-7615307 FORWARD	1088.66	3228.43
Brapa_ESTC005589	AT1G09770	Symbols: AtMYBCDC5, CDC5, ATCDC5 | ATCDC5 (Arabidopsis thaliana homolog of cdc5); DNA binding / transcription factor | chr1:3162004-3165124 FORWARD	9384.67	3222.8
Brapa_ESTC046607	AT5G62430	Symbols: CDF1 | CDF1 (CYCLING DOF FACTOR 1); DNA binding / protein binding / transcription factor | chr5:25086524-25088013 REVERSE	819.382	3216.15
Brapa_ESTC026705	AT3G53710	| Symbols: AGD6 | AGD6; DNA binding | chr3:19914708-19916397 REVERSE	3282.5	3213.52
Brapa_ESTC028509	AT1G51745	Symbols: | similar to ATP binding / DNA binding [Arabidopsis thaliana] (TAIR:AT3G21295.1); similar to Os04g0599100 [Oryza sativa (japonica cultivar-group)] (GB:NP_001053748.1); similar to Os01g0558500 [Oryza sativa (japonica cultivar-group)] (GB:NP_001043335.1); similar to serine-rich repeat protein [Streptococcus agalactiae] (GB:AAZ95526.1); contains domain Tudor/PWWP/MBT (SSF63748) | chr1:19195…	1298.55	3213.04
Brapa_ESTC014887	AT5G35330	Symbols: MBD2, MBD02 | MBD02 (methyl-CpG-binding domain 2); DNA binding | chr5:13540955-13542500 REVERSE	2447.08	3208.55
Brapa_ESTC027423	AT5G65410	Symbols: ATHB25, ZFHD2 | ATHB25/ZFHD2 (ZINC FINGER HOMEODOMAIN 2); DNA binding / transcription factor | chr5:26153405-26154244 FORWARD	1057.96	3202.91
Brapa_ESTC038765	AT4G17695	Symbols: KAN3 | KAN3 (KANADI 3); DNA binding / transcription factor | chr4:9848147-9850711 REVERSE	3726.02	3201.87
Brapa_ESTC027628	AT3G10113	Symbols: | myb family transcription factor | chr3:3118048-3119396 REVERSE	5475.27	3178.08
Brapa_ESTC010839	AT3G53710	| Symbols: AGD6 | AGD6; DNA binding | chr3:19914708-19916397 REVERSE	2334.09	3175.14
Brapa_ESTC050759	AT2G37550	Symbols: AGD7, ASP1 | ASP1 (PDE1 SUPPRESSOR 1); DNA binding | chr2:15762622-15764534 REVERSE	4435.69	3171.9
Brapa_ESTC014002	AT3G16857	Symbols: ARR1 | ARR1 (ARABIDOPSIS RESPONSE REGULATOR 1); transcription factor/ two-component response regulator | chr3:5756119-5759145 FORWARD	4340.22	3166.91
Brapa_ESTC047715	AT4G02590	Symbols: UNE12 | UNE12 (unfertilized embryo sac 12); DNA binding | chr4:1137968-1140306 REVERSE	4370.8	3163.86
Brapa_ESTC023366	AT1G08540	Symbols: SIGA, SIG2, SIGB | SIGB (SIGMA FACTOR B); DNA binding / DNA-directed RNA polymerase/ transcription factor | chr1:2703464-2706699 FORWARD	1183.82	3152.56
Brapa_ESTC011321	AT1G49010	Symbols: | myb family transcription factor | chr1:18136382-18137446 FORWARD	930.546	3141.17
Brapa_ESTC044203	AT4G18770	Symbols: AtMYB98, MYB98 | MYB98 (myb domain protein 98); DNA binding / transcription factor | chr4:10311079-10312568 FORWARD	1515.81	3132.3
Brapa_ESTC011485	AT5G23420	Symbols: HMGB6 | HMGB6 (High mobility group B 6); transcription factor | chr5:7888715-7890114 REVERSE	1608.02	3124.17
Brapa_ESTC017723	AT5G54310	Symbols: AGD5 | AGD5 (ARF-GAP DOMAIN 5); DNA binding | chr5:22074488-22078292 REVERSE	7513.15	3121.74
Brapa_ESTC025764	AT1G19850	Symbols: ARF5, IAA24, MP | MP (MONOPTEROS); transcription factor | chr1:6887344-6891173 FORWARD	1901.5	3115.61
Brapa_ESTC022885	AT5G08330	Symbols: | TCP family transcription factor, putative | chr5:2680829-2681548 FORWARD	5421.09	3113.7
Brapa_ESTC023357	AT1G18330	Symbols: EPR1 | EPR1 (EARLY-PHYTOCHROME-RESPONSIVE1); DNA binding / transcription factor | chr1:6306189-6307633 REVERSE	4000.69	3098.09
Brapa_ESTC011546	AT2G30590	Symbols: WRKY21 | WRKY21 (WRKY DNA-binding protein 21); transcription factor | chr2:13040968-13042380 FORWARD	4708.61	3095.96
Brapa_ESTC011308	AT1G43860	| Symbols: | transcription factor | chr1:16624684-16626825 REVERSE	3173.03	3086.47
Brapa_ESTC039817	AT1G19850	Symbols: ARF5, IAA24, MP | MP (MONOPTEROS); transcription factor | chr1:6887344-6891173 FORWARD	2617.01	3077.36
Brapa_ESTC037301	AT2G03070	Symbols: | similar to NPH4 (NON-PHOTOTROPHIC HYPOCOTYL), transcription factor [Arabidopsis thaliana] (TAIR:AT5G20730.3); similar to hypothetical protein Os03g31010 [Oryza sativa (japonica cultivar-group)] (GB:AAP20836.1) | chr2:905977-908791 FORWARD	3365.57	3074.99
Brapa_ESTC012001	AT5G47220	Symbols: ATERF2, ATERF-2, ERF2 | ATERF-2/ATERF2/ERF2 (ETHYLENE RESPONSE FACTOR 2); DNA binding / transcription factor/ transcriptional activator | chr5:19189250-19189981 REVERSE	2494.12	3070.53
Brapa_ESTC012196	AT5G04410	Symbols: ANAC078, NAC2 | NAC2 (Arabidopsis NAC domain containing protein 78); transcription factor | chr5:1243981-1246417 FORWARD	7706.15	3055.26
Brapa_ESTC048197	AT5G47640	| Symbols: | CCAAT-box binding transcription factor subunit B	2123.58	3054
Brapa_ESTC020548	AT4G34340	Symbols: | similar to unknown protein [Arabidopsis thaliana] (TAIR:AT5G15570.1); similar to Bromodomain associated family protein, expressed [Oryza sativa (japonica cultivar-group)] (GB:ABA98992.1); similar to Os12g0574800 [Oryza sativa (japonica cultivar-group)] (GB:NP_001067103.1); contains InterPro domain Bromodomain transcription factor; (InterPro:IPR006565); contains InterPro domain Histone-…	1990.38	3048.13
Brapa_ESTC043389	AT3G27010	Symbols: PCF1, AT-TCP20 | AT-TCP20 ("Arabidopsis thaliana teosinte branched 1, cycloidea, PCF (TCP)-domain family protein 20"); transcription factor | chr3:9959047-9959991 REVERSE	4295.54	3047.49
Brapa_ESTC038731	AT2G40260	Symbols: | myb family transcription factor | chr2:16823896-16825551 REVERSE	1027.46	3046.57
Brapa_ESTC026217	AT5G24800	Symbols: ATBZIP9, BZO2H2 | BZO2H2 (basic leucine zipper O2 homolog 2); DNA binding / transcription factor | chr5:8515262-8516544 FORWARD	1728.48	3041.59
Brapa_ESTC007968	AT4G22950	Symbols: GL19, AGL19 | AGL19 (AGAMOUS-LIKE 19); transcription factor | chr4:12023957-12027432 REVERSE	2191.62	3031.32
Brapa_ESTC000071	AT5G43700	Symbols: IAA4, ATAUX2-11 | ATAUX2-11 (indoleacetic acid-induced protein 4); transcription factor | chr5:17567692-17568433 FORWARD	1423.08	3030.03
Brapa_ESTC023180	AT3G05545	Symbols: | transcription factor, putative / zinc finger (C3HC4 type RING finger) family protein | chr3:1609442-1612139 FORWARD	2823.87	3029.29
Brapa_ESTC002189	AT1G52150	Symbols: ATHB15, CNA, ICU4, ATHB-15 | ATHB-15 (INCURVATA 4); DNA binding / transcription factor | chr1:19413582-19417630 REVERSE	3016.44	3019.01
Brapa_ESTC017689	AT1G51600	Symbols: ZML2 | ZML2 (ZIM-LIKE 2); transcription factor | chr1:19136844-19138920 FORWARD	471.88	3008.8
Brapa_ESTC010041	AT1G08540	Symbols: SIGA, SIG2, SIGB | SIGB (SIGMA FACTOR B); DNA binding / DNA-directed RNA polymerase/ transcription factor | chr1:2703464-2706699 FORWARD	1036.34	3003.58
Brapa_ESTC040709	AT1G79430	Symbols: WDY, APL | APL (ALTERED PHLOEM DEVELOPMENT); transcription factor | chr1:29882414-29884028 REVERSE	1848.78	2994.03
Brapa_ESTC026242	AT4G36900	Symbols: RAP2.10 | RAP2.10 (related to AP2 10); DNA binding / transcription factor | chr4:17389012-17389602 FORWARD	6573.8	2993.43
Brapa_ESTC040097	AT1G27730	Symbols: ZAT10, STZ | STZ (SALT TOLERANCE ZINC FINGER); nucleic acid binding / transcription factor/ zinc ion binding | chr1:9648289-9648972 REVERSE	6269.33	2992.01
Brapa_ESTC019462	AT1G28370	Symbols: ERF11, ATERF11 | ATERF11/ERF11 (ERF domain protein 11); DNA binding / transcription factor/ transcriptional repressor | chr1:9956337-9956837 REVERSE	2809.34	2978.86
Brapa_ESTC026812	AT4G02590	Symbols: UNE12 | UNE12 (unfertilized embryo sac 12); DNA binding | chr4:1137968-1140306 REVERSE	2614.79	2976.5
Brapa_ESTC020714	AT3G26744	Symbols: ICE1 | ICE1 (INDUCER OF CBF EXPRESSION 1); DNA binding | chr3:9834190-9836027 REVERSE	2630.36	2973.13
Brapa_ESTC021343	AT1G68670	Symbols: | myb family transcription factor | chr1:25786007-25787536 FORWARD	3219.72	2963.62
Brapa_ESTC013468	AT1G50420	Symbols: SCL3 | SCL3 (SCARECROW-LIKE 3); transcription factor | chr1:18681845-18683293 REVERSE	7592.94	2938.77
Brapa_ESTC015311	AT1G20696	Symbols: NFD3, NFD03, HMGB3 | HMGB3 (HIGH MOBILITY GROUP B 3); transcription factor | chr1:7179815-7181164 FORWARD	3444.47	2893.02
Brapa_ESTC012279	AT2G31370	Symbols: | DNA binding / transcription factor | chr2:13386525-13388114 FORWARD	4082.19	2872.52
Brapa_ESTC024557	AT5G65210	Symbols: | DNA binding / calmodulin binding / transcription factor | chr5:26076257-26077975 FORWARD	3891.55	2872.19
Brapa_ESTC022068	AT1G06070	Symbols: | bZIP transcription factor, putative (bZIP69) | chr1:1835200-1837115 REVERSE	5516.79	2864.37
Brapa_ESTC038394	AT4G17230	Symbols: SCL13 | SCL13 (SCARECROW-LIKE 13); transcription factor | chr4:9661405-9662268 REVERSE	6239.32	2851.49
Brapa_ESTC028977	AT4G24240	Symbols: ATWRKY7, WRKY7 | WRKY7 (WRKY DNA-binding protein 7); transcription factor | chr4:12571940-12573456 FORWARD	1762.49	2842.39
Brapa_ESTC007113	AT1G22070	Symbols: TGA3 | TGA3 (TGA1a-related gene 3); DNA binding / calmodulin binding / transcription factor | chr1:7789640-7791810 FORWARD	3404.17	2841.7
Brapa_ESTC039293	AT1G04550	Symbols: BDL, IAA12 | IAA12 (AUXIN-INDUCED PROTEIN 12); transcription factor | chr1:1240581-1241809 FORWARD	1601.03	2835.74
Brapa_ESTC022344	AT4G17490	Symbols: ERF-6-6, ATERF6 | ATERF6 (ETHYLENE RESPONSIVE ELEMENT BINDING FACTOR 6); DNA binding / transcription factor | chr4:9752985-9753833 REVERSE	1996.87	2832.83
Brapa_ESTC022773	AT5G04410	Symbols: ANAC078, NAC2 | NAC2 (Arabidopsis NAC domain containing protein 78); transcription factor | chr5:1243981-1246417 FORWARD	4438.04	2831.9
Brapa_ESTC001950	AT4G37260	Symbols: MYB73, AtMYB73 | AtMYB73/MYB73 (myb domain protein 73); DNA binding / transcription factor | chr4:17540596-17541558 FORWARD	7323.27	2825.87
Brapa_ESTC014874	AT3G54810	Symbols: BME3-ZF, BME3 | BME3/BME3-ZF (BLUE MICROPLYLAR END3); transcription factor | chr3:20307935-20309214 FORWARD	12116.6	2825
Brapa_ESTC008554	AT5G65790	Symbols: AtMYB68, MYB68 | MYB68 (myb domain protein 68); DNA binding / transcription factor | chr5:26340261-26341611 FORWARD	1739.46	2823.81
Brapa_ESTC026756	AT4G02590	Symbols: UNE12 | UNE12 (unfertilized embryo sac 12); DNA binding | chr4:1137968-1140306 REVERSE	2628.21	2820.01
Brapa_ESTC027934	AT2G01060	Symbols: | myb family transcription factor | chr2:73456-74902 REVERSE	5183.75	2814.53
Brapa_ESTC046556	AT5G64530	Symbols: ANAC104, XND1 | ANAC104/XND1 (Arabidopsis NAC domain containing protein 104); transcription factor | chr5:25812586-25813925 FORWARD	2115.63	2812.25
Brapa_ESTC034965	AT4G17060	Symbols: | similar to transcription factor [Arabidopsis thaliana] (TAIR:AT2G44730.1); contains domain Origin of replication-binding domain, RBD-like (SSF55464) | chr4:9593740-9594672 REVERSE	4752.19	2810.78
Brapa_ESTC029317	AT1G71130	Symbols: | AP2 domain-containing transcription factor, putative | chr1:26826539-26827024 FORWARD	4299.79	2806.35
Brapa_ESTC009517	AT1G22070	Symbols: TGA3 | TGA3 (TGA1a-related gene 3); DNA binding / calmodulin binding / transcription factor | chr1:7789640-7791810 FORWARD	5151.95	2801.44
Brapa_ESTC047290	AT3G28917	Symbols: MIF2 | MIF2 (MINI ZINC FINGER 2); DNA binding | chr3:10926251-10926553 FORWARD	3006.41	2800.35
Brapa_ESTC043127	AT5G25470	| Symbols: | DNA binding | chr5:8865857-8867237 REVERSE	4101.52	2795.94
Brapa_ESTC010879	AT5G05090	Symbols: | myb family transcription factor | chr5:1503394-1504194 FORWARD	3369.29	2790.73
Brapa_ESTC000779	AT1G49480	Symbols: RTV1 | RTV1 (RELATED TO VERNALIZATION1 1); DNA binding / transcription factor | chr1:18318264-18319128 REVERSE	813.785	2788.93
Brapa_ESTC021314	AT5G47390	Symbols: | myb family transcription factor | chr5:19244228-19245773 FORWARD	4841.03	2781.67
Brapa_ESTC005171	AT2G43140	Symbols: | DNA binding / transcription factor | chr2:17939453-17942716 REVERSE	3290.38	2777.23
Brapa_ESTC026806	AT2G30590	Symbols: WRKY21 | WRKY21 (WRKY DNA-binding protein 21); transcription factor | chr2:13040968-13042380 FORWARD	3294.68	2773.82
Brapa_ESTC003287	AT2G47260	Symbols: WRKY23 | WRKY23 (WRKY DNA-binding protein 23); transcription factor | chr2:19412115-19413516 REVERSE	4071.06	2754.74
Brapa_ESTC013049	AT1G08465	Symbols: YAB2 | YAB2 (YABBY 2); transcription factor | chr1:2676030-2679385 FORWARD	2427.96	2753.63
Brapa_ESTC017056	AT3G01140	Symbols: AtMYB106, MYB106 | MYB106 (myb domain protein 106); DNA binding / transcription factor | chr3:46626-48150 REVERSE	1502.41	2752.3
Brapa_ESTC044118	AT3G16857	Symbols: ARR1 | ARR1 (ARABIDOPSIS RESPONSE REGULATOR 1); transcription factor/ two-component response regulator | chr3:5756119-5759145 FORWARD	2182.99	2741.93
Brapa_ESTC019041	AT3G61830	Symbols: ARF18 | ARF18 (AUXIN RESPONSE FACTOR 18); transcription factor | chr3:22899146-22902154 FORWARD	3074.34	2735.71
Brapa_ESTC007771	AT2G22800	Symbols: HAT9 | HAT9 (homeobox-leucine zipper protein 9); DNA binding / transcription factor | chr2:9712029-9713128 REVERSE	2118.96	2729.08
Brapa_ESTC045178	AT4G39410	Symbols: ATWRKY13, WRKY13 | WRKY13 (WRKY DNA-binding protein 13); transcription factor | chr4:18332931-18334783 REVERSE	1719.32	2727.82
Brapa_ESTC051547	AT2G46400	Symbols: ATWRKY46, WRKY46 | WRKY46 (WRKY DNA-binding protein 46); transcription factor | chr2:19050749-19051827 REVERSE	1653.99	2705.12
Brapa_ESTC011226	AT2G44730	| Symbols: | transcription factor | chr2:18444522-18445640 REVERSE	1536.19	2704.17
Brapa_ESTC021296	AT3G20910	Symbols: | CCAAT-binding transcription factor (CBF-B/NF-YA) family protein | chr3:7326501-7328375 FORWARD	3118	2699.85
Brapa_ESTC045211	AT4G02590	Symbols: UNE12 | UNE12 (unfertilized embryo sac 12); DNA binding | chr4:1137968-1140306 REVERSE	3068.54	2699.82
Brapa_ESTC018398	AT4G24470	Symbols: ZIM | ZIM (ZINC-FINGER PROTEIN EXPRESSED IN INFLORESCENCE MERISTEM); transcription factor | chr4:12645795-12647744 FORWARD	4673.62	2699.02
Brapa_ESTC020170	AT1G58100	Symbols: | TCP family transcription factor, putative | chr1:21516345-21517550 REVERSE	2985.95	2694.23
Brapa_ESTC003355	AT1G32640	Symbols: RD22BP1, JAI1, JIN1, MYC2, ZBF1, ATMYC2 | ATMYC2 (JASMONATE INSENSITIVE 1); DNA binding / transcription factor | chr1:11799022-11800893 REVERSE	2955.97	2692.58
Brapa_ESTC047365	AT3G18035	| Symbols: HON4 | HON4; DNA binding | chr3:6169390-6171564 REVERSE	3686.27	2692.53
Brapa_ESTC021297	AT1G71030	Symbols: ATMYBL2 | ATMYBL2 (Arabidopsis myb-like 2); DNA binding / transcription factor | chr1:26799045-26799888 REVERSE	5717.08	2685.45
Brapa_ESTC023871	AT5G51230	Symbols: VEF2, CYR1, EMF2 | EMF2 (EMBRYONIC FLOWER 2); transcription factor | chr5:20841379-20846570 FORWARD	2454.12	2682.58
Brapa_ESTC015901	AT1G58025	| Symbols: | DNA binding | chr1:21461884-21465422 REVERSE	4488.18	2681.1
Brapa_ESTC011836	AT1G69600	Symbols: ATHB29, ZFHD1 | ATHB29/ZFHD1 (ZINC FINGER HOMEODOMAIN 1); DNA binding / transcription factor/ transcriptional activator | chr1:26186133-26186861 FORWARD	3365.18	2680.36
Brapa_ESTC037797	AT3G29035	Symbols: ANAC059, ATNAC3 | ANAC059/ATNAC3 (Arabidopsis NAC domain containing protein 59); protein heterodimerization/ transcription factor | chr3:11035076-11036243 FORWARD	3727.6	2677.23
Brapa_ESTC011807	AT4G17500	Symbols: ATERF-1 | ATERF-1 (ETHYLENE RESPONSIVE ELEMENT BINDING FACTOR 1); DNA binding / transcription factor/ transcriptional activator | chr4:9759658-9760224 FORWARD	2858.07	2675.4
Brapa_ESTC013161	AT1G51200	Symbols: | A20/AN-1 like zinc finger protein	160.843	2673.74
Brapa_ESTC043941	AT3G60590	| Symbols: | DNA binding | chr3:22409739-22410728 FORWARD	4263.24	2673.23
Brapa_ESTC024706	AT3G12480	Symbols: | transcription factor, putative | chr3:3958072-3960285 FORWARD	2226.19	2671.27
Brapa_ESTC013135	AT5G65070	Symbols: FCL4, MAF4 | MAF4 (MADS AFFECTING FLOWERING 4); transcription factor | chr5:26009536-26013156 FORWARD	2420.24	2670.51
Brapa_ESTC005789	AT5G65640	Symbols: BHLH093 | BHLH093 (BETA HLH PROTEIN 93); DNA binding / transcription factor | chr5:26254363-26256130 FORWARD	1450.44	2669.02
Brapa_ESTC040148	AT1G29280	Symbols: ATWRKY65, WRKY65 | WRKY65 (WRKY DNA-binding protein 65); transcription factor | chr1:10236575-10237453 FORWARD	6402.3	2666.47
Brapa_ESTC015911	AT1G18570	Symbols: AtMYB51, BW51A, BW51B, MYB51 | MYB51 (myb domain protein 51); DNA binding / transcription factor | chr1:6389758-6391019 FORWARD	3233.69	2652.83
Brapa_ESTC030761	AT5G17800	Symbols: AtMYB56 | AtMYB56 (myb domain protein 56); DNA binding / transcription factor | chr5:5877249-5879073 FORWARD	1928.67	2645.62
Brapa_ESTC030717	AT2G43140	Symbols: | DNA binding / transcription factor | chr2:17939453-17942716 REVERSE	3507.11	2644.09
Brapa_ESTC028094	AT5G65670	Symbols: IAA9 | IAA9 (indoleacetic acid-induced protein 9); transcription factor | chr5:26271689-26273360 FORWARD	9450.59	2643.06
Brapa_ESTC032739	AT1G19220	Symbols: IAA22, ARF11, ARF19 | ARF19 (AUXIN RESPONSE FACTOR 11); transcription factor | chr1:6628386-6632770 REVERSE	2395.1	2638.87
Brapa_ESTC014537	AT3G54280	Symbols: | ATP binding / DNA binding / helicase | chr3:20103339-20114785 FORWARD	1047.5	2636.53
Brapa_ESTC003477	AT3G58680	Symbols: MBF1B, ATMBF1B | ATMBF1B/MBF1B (MULTIPROTEIN BRIDGING FACTOR 1B); DNA binding / transcription coactivator | chr3:21718344-21719602 FORWARD	7333.78	2636.05
Brapa_ESTC033601	AT2G44940	Symbols: | AP2 domain-containing transcription factor TINY, putative | chr2:18544369-18545256 FORWARD	1781.1	2631.41
Brapa_ESTC020688	AT3G55370	Symbols: OBP3 | OBP3 (OBF-BINDING PROTEIN 3); DNA binding | chr3:20538175-20539853 FORWARD	3756.98	2630.8
Brapa_ESTC005354	AT5G59800	Symbols: MBD7 | MBD7 (methyl-CpG-binding domain 7); DNA binding | chr5:24111978-24113648 REVERSE	1660.47	2611.36
Brapa_ESTC023092	AT1G33240	Symbols: AT-GTL2 | AT-GTL1 (Arabidopsis thaliana GT2-like 1); transcription factor | chr1:12051839-12054300 REVERSE	4868.98	2609.96
Brapa_ESTC044543	AT4G28500	Symbols: ANAC073 | ANAC073 (Arabidopsis NAC domain containing protein 73); transcription factor | chr4:14083020-14084272 FORWARD	2129.35	2606.97
Brapa_ESTC040315	AT1G31010	Symbols: OSB4 | single-stranded DNA binding | chr1:11054907-11056854 REVERSE	4647.3	2602.64
Brapa_ESTC034360	AT5G05410	Symbols: DREB2, DREB2A | DREB2A (DRE-BINDING PROTEIN 2A); DNA binding / transcription factor/ transcriptional activator | chr5:1602651-1603658 FORWARD	1689.83	2595.23
Brapa_ESTC023445	AT3G05380	Symbols: | DNA binding / transcription factor | chr3:1540568-1546145 FORWARD	4187.36	2594.5
Brapa_ESTC046237	AT5G54680	Symbols: ILR3 | ILR3 (IAA-LEUCINE RESISTANT3); DNA binding / transcription factor | chr5:22234496-22236219 FORWARD	6265.91	2591.23
Brapa_ESTC046863	AT5G53200	Symbols: TRY | TRY (TRIPTYCHON); DNA binding / transcription factor | chr5:21600139-21601186 FORWARD	3170.15	2590.02
Brapa_ESTC005947	AT1G50600	Symbols: SCL5 | SCL5; transcription factor | chr1:18741066-18743215 REVERSE	2832.66	2585.04
Brapa_ESTC022763	AT2G36990	Symbols: SIG6, SIGF | SIGF (RNA POLYMERASE SIGMA-70 FACTOR); DNA binding / DNA-directed RNA polymerase/ transcription factor | chr2:15544581-15547095 REVERSE	3230.94	2583.35
Brapa_ESTC006875	AT1G21450	Symbols: SCL1 | SCL1 (SCARECROW-LIKE 1); transcription factor | chr1:7509710-7511491 FORWARD	2105.14	2582.14
Brapa_ESTC005584	AT3G05545	Symbols: | transcription factor, putative / zinc finger (C3HC4 type RING finger) family protein | chr3:1609442-1612139 FORWARD	2604.41	2578.57
Brapa_ESTC013435	AT3G05800	| Symbols: | transcription factor | chr3:1727482-1728117 FORWARD	974.361	2576.79
Brapa_ESTC027897	AT3G61970	Symbols: NGA2 | NGA2 (NGATHA2); transcription factor | chr3:22962804-22963703 FORWARD	4938.71	2573.29
Brapa_ESTC021725	AT1G34190	Symbols: ANAC017 | ANAC017 (Arabidopsis NAC domain containing protein 17); transcription factor | chr1:12451707-12453892 FORWARD	3267.84	2565.08
Brapa_ESTC044486	AT4G26640	Symbols: ATWRKY20, WRKY20 | WRKY20 (WRKY DNA-binding protein 20); transcription factor | chr4:13437304-13440699 REVERSE	3823.25	2562.21
Brapa_ESTC025153	AT4G17460	Symbols: HAT1 | HAT1 (homeobox-leucine zipper protein 1); DNA binding / transcription factor | chr4:9739874-9740995 FORWARD	2407.35	2553.43
Brapa_ESTC025017	AT4G04450	Symbols: ATWRKY42, WRKY42 | WRKY42 (WRKY DNA-binding protein 42); transcription factor | chr4:2218377-2221111 FORWARD	2917.43	2551.79
Brapa_ESTC015050	AT5G05790	Symbols: | myb family transcription factor | chr5:1740725-1741672 REVERSE	2088.4	2550.4
Brapa_ESTC024846	AT4G36710	Symbols: | scarecrow transcription factor family protein | chr4:17306064-17307524 FORWARD	2617.72	2549.36
Brapa_ESTC040638	AT1G77920	Symbols: | bZIP family transcription factor | chr1:29303853-29305501 FORWARD	1633.74	2549.34
Brapa_ESTC034606	AT2G45190	Symbols: FIL, YAB1, AFO | AFO (ABNORMAL FLORAL ORGANS); transcription factor | chr2:18635524-18637626 REVERSE	1510.83	2548.29
Brapa_ESTC040421	AT1G69310	Symbols: ATWRKY57, WRKY57 | WRKY57 (WRKY DNA-binding protein 57); transcription factor | chr1:26059781-26061572 REVERSE	4808.96	2547.24
Brapa_ESTC007547	AT1G51745	Symbols: | similar to ATP binding / DNA binding [Arabidopsis thaliana] (TAIR:AT3G21295.1); similar to Os04g0599100 [Oryza sativa (japonica cultivar-group)] (GB:NP_001053748.1); similar to Os01g0558500 [Oryza sativa (japonica cultivar-group)] (GB:NP_001043335.1); similar to serine-rich repeat protein [Streptococcus agalactiae] (GB:AAZ95526.1); contains domain Tudor/PWWP/MBT (SSF63748) | chr1:19195…	1179.97	2543.86
Brapa_ESTC021405	AT1G54160	Symbols: | CCAAT-binding transcription factor (CBF-B/NF-YA) family protein | chr1:20221248-20222373 REVERSE	1564.21	2542.34
Brapa_ESTC002236	AT1G15480	| Symbols: | DNA binding | chr1:5318302-5320417 FORWARD	1904.35	2540.88
Brapa_ESTC045411	AT3G13445	Symbols: TFIID-1, TBP1 | TBP1 (transcription factor IID-1); DNA binding / RNA polymerase II transcription factor | chr3:4380324-4381658 FORWARD	2169.91	2532.03
Brapa_ESTC010208	AT4G17050	| Symbols: | transcription factor | chr4:9589681-9592432 FORWARD	254.534	2531.65
Brapa_ESTC005769	AT5G60410	Symbols: ATSIZ1, SIZ1 | ATSIZ1/SIZ1; DNA binding / SUMO ligase | chr5:24312452-24317897 FORWARD	5457.76	2527.19
Brapa_ESTC022592	AT3G17100	| Symbols: | transcription factor | chr3:5831558-5832250 FORWARD	1189.32	2525.58
Brapa_ESTC000281	AT4G11660	Symbols: HSFB2B, AT-HSFB2B | AT-HSFB2B (Arabidopsis thaliana heat shock transcription factor B2B); transcription factor | chr4:7043000-7044221 FORWARD	2860.86	2522.46
Brapa_ESTC031479	AT1G27000	Symbols: | bZIP family transcription factor | chr1:9374055-9376409 FORWARD	2580.47	2520.23
Brapa_ESTC018458	AT4G16110	Symbols: ARR2 | ARR2 (ARABIDOPSIS RESPONSE REGULATOR 2); transcription factor/ two-component response regulator | chr4:9112989-9115646 FORWARD	3076.97	2509.95
Brapa_ESTC038348	AT4G01720	Symbols: ATWRKY47, WRKY47 | WRKY47 (WRKY DNA-binding protein 47); transcription factor | chr4:744949-748219 FORWARD	4186.65	2507.85
Brapa_ESTC028854	AT4G34430	Symbols: ATSWI3D, CHB3 | CHB3 (Arabidopsis thaliana switch 3D); DNA binding / transcription factor | chr4:16461073-16464997 FORWARD	3708.83	2500.84
Brapa_ESTC040921	AT1G52890	Symbols: ANAC019 | ANAC019 (Arabidopsis NAC domain containing protein 19); transcription factor | chr1:19700960-19702112 REVERSE	2539.38	2498.41
Brapa_ESTC018952	AT1G74430	Symbols: AtMYB95, AtMYBCP66, MYB95 | MYB95 (myb domain protein 95); DNA binding / transcription factor | chr1:27979070-27980779 FORWARD	1492.92	2491.1
Brapa_ESTC023501	AT2G03340	Symbols: WRKY3 | WRKY3 (WRKY DNA-binding protein 3); transcription factor | chr2:1014721-1016933 REVERSE	8255.97	2489.58
Brapa_ESTC021078	AT2G04880	Symbols: ATWRKY1, WRKY1, ZAP1 | ZAP1 (WRKY FAMILY transcription factor 1); transcription factor/ transcriptional activator | chr2:1718554-1720216 FORWARD	2636.69	2488.16
Brapa_ESTC023843	AT2G37650	Symbols: | scarecrow-like transcription factor 9 (SCL9) | chr2:15799701-15801857 FORWARD	2197.39	2487.36
Brapa_ESTC031232	AT4G04890	Symbols: PDF2 | PDF2 (PROTODERMAL FACTOR2); DNA binding / transcription factor | chr4:2476968-2480088 REVERSE	2544.1	2482.7
Brapa_ESTC017573	AT1G32330	Symbols: HSFA1D, ATHSFA1D | ATHSFA1D (Arabidopsis thaliana heat shock transcription factor A1D); DNA binding / transcription factor | chr1:11657245-11660214 REVERSE	4590.58	2474.49
Brapa_ESTC027443	AT3G15510	Symbols: ANAC056, ATNAC2 | ATNAC2 (Arabidopsis thaliana NAC domain containing protein 2); transcription factor | chr3:5243703-5245044 FORWARD	9098.06	2474.43
Brapa_ESTC009518	AT4G36730	Symbols: GBF1 | GBF1 (G-box binding factor 1); transcription factor | chr4:17309854-17311756 REVERSE	2925.28	2474.2
Brapa_ESTC003317	AT3G25890	Symbols: | AP2 domain-containing transcription factor, putative | chr3:9477289-9478287 FORWARD	1855.05	2472.29
Brapa_ESTC031608	AT3G61150	Symbols: HDG1 | HDG1 (HOMEODOMAIN GLABROUS1); DNA binding / transcription factor | chr3:22641744-22645850 FORWARD	3481.07	2462.23
Brapa_ESTC048988	AT4G16420	Symbols: PRZ1, ADA2B | ADA2B (PROPORZ1); DNA binding / transcription factor | chr4:9262828-9265798 REVERSE	2043.25	2456.97
Brapa_ESTC012235	AT1G52150	Symbols: ATHB15, CNA, ICU4, ATHB-15 | ATHB-15 (INCURVATA 4); DNA binding / transcription factor | chr1:19413582-19417630 REVERSE	2203.28	2448.56
Brapa_ESTC022999	AT1G21450	Symbols: SCL1 | SCL1 (SCARECROW-LIKE 1); transcription factor | chr1:7509710-7511491 FORWARD	1735.95	2440.92
Brapa_ESTC039900	AT1G22070	Symbols: TGA3 | TGA3 (TGA1a-related gene 3); DNA binding / calmodulin binding / transcription factor | chr1:7789640-7791810 FORWARD	3513.24	2434.8
Brapa_ESTC019858	AT5G08130	Symbols: BIM1 | BIM1 (BES1-interacting Myc-like protein 1); DNA binding / transcription factor | chr5:2606656-2608653 REVERSE	2036.3	2422.18
Brapa_ESTC012387	AT1G67030	Symbols: ZFP6 | ZFP6 (ZINC FINGER PROTEIN 6); nucleic acid binding / transcription factor/ zinc ion binding | chr1:25020307-25020900 FORWARD	2385.88	2418.24
Brapa_ESTC019889	AT5G23260	Symbols: ABS, TT16 | TT16 (TRANSPARENT TESTA16); transcription factor | chr5:7836445-7838343 FORWARD	2549.51	2408.86
Brapa_ESTC029932	AT3G20310	Symbols: ATERF-7, ATERF7, ERF7 | ERF7 (ETHYLINE RESPONSE FACTOR7); DNA binding / protein binding / transcription factor/ transcriptional repressor | chr3:7085963-7086697 REVERSE	2408.09	2368.85
Brapa_ESTC029215	AT1G49560	Symbols: | myb family transcription factor | chr1:18346393-18347769 FORWARD	1556.24	2365.9
Brapa_ESTC012355	AT3G12730	Symbols: | myb family transcription factor | chr3:4047241-4048363 REVERSE	3937.3	2363.54
Brapa_ESTC037538	AT5G27610	Symbols: | DNA binding / transcription factor | chr5:9764855-9769709 FORWARD	2154.35	2362.24
Brapa_ESTC030602	AT1G55520	Symbols: ATTBP2 | TBP2 (TATA binding protein 2); DNA binding / RNA polymerase II transcription factor | chr1:20729816-20731149 REVERSE	1854.55	2361.16
Brapa_ESTC045770	AT5G17300	Symbols: | myb family transcription factor | chr5:5690437-5692437 REVERSE	2081.21	2360.03
Brapa_ESTC033124	AT3G49530	Symbols: ANAC062 | ANAC062 (Arabidopsis NAC domain containing protein 62); transcription factor | chr3:18373624-18375702 REVERSE	4929.24	2345.63
Brapa_ESTC036953	AT4G36540	Symbols: BEE2 | BEE2 (BR ENHANCED EXPRESSION 2); DNA binding / transcription factor | chr4:17243702-17244968 FORWARD	1085.32	2339.88
Brapa_ESTC017762	AT2G18328	| Symbols: | DNA binding | chr2:7971560-7971793 FORWARD	401.22	2336.12
Brapa_ESTC025326	AT3G22220	Symbols: | DNA binding / protein dimerization | chr3:7839815-7842365 REVERSE	2945.49	2326.43
Brapa_ESTC049095	AT3G15210	Symbols: ATERF-4, ERF4, RAP2.5, ATERF4 | ATERF-4/ATERF4/ERF4/RAP2.5 (ETHYLENE RESPONSIVE ELEMENT BINDING FACTOR 4); DNA binding / protein binding / transcription factor/ transcriptional repressor | chr3:5121479-5122147 FORWARD	2388	2321.66
Brapa_ESTC027102	AT1G27000	Symbols: | bZIP family transcription factor | chr1:9374055-9376409 FORWARD	2186.47	2305.03
Brapa_ESTC017419	AT2G45160	Symbols: | scarecrow transcription factor family protein | chr2:18625185-18627107 REVERSE	1734.95	2276.17
Brapa_ESTC018185	AT1G53320	Symbols: AtTLP7 | AtTLP7 (TUBBY LIKE PROTEIN 7); phosphoric diester hydrolase/ transcription factor | chr1:19894905-19897097 REVERSE	5859.58	2268.45
Brapa_ESTC029501	AT1G10120	Symbols: | DNA binding / transcription factor | chr1:3304230-3305986 REVERSE	638.75	2266.27
Brapa_ESTC038793	AT4G17750	Symbols: HSFA1A, ATHSF1, ATHSFA1A, HSF1 | HSF1 (ARABIDOPSIS HEAT SHOCK FACTOR 1); DNA binding / transcription factor | chr4:9869982-9871616 REVERSE	2765.99	2256.85
Brapa_ESTC020987	AT5G16820	Symbols: HSFA1B, ATHSFA1B, HSF3 | HSF3 (HEAT SHOCK FACTOR 3); DNA binding / transcription factor | chr5:5530449-5532500 FORWARD	1836.48	2252.91
Brapa_ESTC042453	AT3G01220	Symbols: ATHB20 | ATHB20 (ARABIDOPSIS THALIANA HOMEOBOX PROTEIN 20); DNA binding / transcription factor | chr3:73606-75302 FORWARD	1184.02	2249.34
Brapa_ESTC015380	AT3G56400	Symbols: ATWRKY70, WRKY70 | WRKY70 (WRKY DNA-binding protein 70); transcription factor | chr3:20920061-20921388 REVERSE	1131.21	2242.82
Brapa_ESTC032312	AT4G01250	Symbols: ATWRKY22, WRKY22 | WRKY22 (WRKY DNA-binding protein 22); transcription factor | chr4:522839-524129 REVERSE	2545.61	2238.08
Brapa_ESTC010830	AT4G17020	Symbols: | transcription factor-related | chr4:9578171-9581101 REVERSE	913.881	2232.11
Brapa_ESTC013970	AT5G17300	Symbols: | myb family transcription factor | chr5:5690437-5692437 REVERSE	2304.37	2225.63
Brapa_ESTC022720	AT4G17890	Symbols: AGD8, UBP20 | UBP20 (UBIQUITIN-SPECIFIC PROTEASE 20); DNA binding | chr4:9937134-9939001 FORWARD	2947.7	2223.51
Brapa_ESTC006545	AT4G00730	Symbols: AHDP, ANL2 | ANL2 (ANTHOCYANINLESS 2); transcription factor | chr4:299741-304103 REVERSE	3040.19	2222.65
Brapa_ESTC029876	AT3G26790	Symbols: FUS3 | FUS3 (FUSCA 3); DNA binding / transcription factor | chr3:9855262-9856985 REVERSE	1771.16	2220.83
Brapa_ESTC022352	AT2G23290	Symbols: AtMYB70 | AtMYB70 (myb domain protein 70); DNA binding / transcription factor | chr2:9911975-9912904 REVERSE	2864.35	2213.2
Brapa_ESTC016127	AT5G06510	Symbols: | CCAAT-binding transcription factor (CBF-B/NF-YA) family protein | chr5:1985759-1986592 FORWARD	768.947	2207.95
Brapa_ESTC006761	AT3G20310	Symbols: ATERF-7, ATERF7, ERF7 | ERF7 (ETHYLINE RESPONSE FACTOR7); DNA binding / protein binding / transcription factor/ transcriptional repressor | chr3:7085963-7086697 REVERSE	1670.27	2203.84
Brapa_ESTC045396	AT5G06800	Symbols: | myb family transcription factor | chr5:2103375-2105681 FORWARD	2330.6	2201.64
Brapa_ESTC041620	AT2G33480	Symbols: ANAC041 | ANAC041 (Arabidopsis NAC domain containing protein 41); transcription factor | chr2:14188351-14189323 FORWARD	504.167	2194.53
Brapa_ESTC007189	AT2G38560	Symbols: | transcription factor S-II (TFIIS) domain-containing protein | chr2:16141880-16143397 FORWARD	1492.1	2182.84
Brapa_ESTC044275	AT4G18770	Symbols: AtMYB98, MYB98 | MYB98 (myb domain protein 98); DNA binding / transcription factor | chr4:10311079-10312568 FORWARD	1097.66	2176.92
Brapa_ESTC016467	AT3G16500	Symbols: IAA26, PAP1 | PAP1 (PHYTOCHROME-ASSOCIATED PROTEIN 1); transcription factor | chr3:5612807-5614214 REVERSE	4119.66	2165.37
Brapa_ESTC012435	AT3G57390	Symbols: AGL18 | AGL18 (AGAMOUS-LIKE 18); transcription factor | chr3:21244887-21246712 FORWARD	1597.34	2160.31
Brapa_ESTC011949	AT2G42780	Symbols: | similar to Os08g0169600 [Oryza sativa (japonica cultivar-group)] (GB:NP_001061087.1); similar to predicted protein [Coprinopsis cinerea okayama7#130] (GB:EAU88783.1); contains InterPro domain RNA polymerase II transcription factor SIII subunit A; (InterPro:IPR010684) | chr2:17808114-17809723 FORWARD	1854.89	2159.62
Brapa_ESTC039738	AT1G19510	Symbols: | myb family transcription factor | chr1:6756474-6757281 REVERSE	972.135	2158.9
Brapa_ESTC004450	AT1G07520	Symbols: | scarecrow transcription factor family protein | chr1:2309715-2311802 REVERSE	2252.16	2155.9
Brapa_ESTC037468	AT1G74430	Symbols: AtMYB95, AtMYBCP66, MYB95 | MYB95 (myb domain protein 95); DNA binding / transcription factor | chr1:27979070-27980779 FORWARD	1269.7	2154.32
Brapa_ESTC027080	AT4G22140	| Symbols: | DNA binding | chr4:11728105-11730242 REVERSE	1735.37	2148.03
Brapa_ESTC007613	AT1G34190	Symbols: ANAC017 | ANAC017 (Arabidopsis NAC domain containing protein 17); transcription factor | chr1:12451707-12453892 FORWARD	5404.4	2146.75
Brapa_ESTC030344	AT3G20910	Symbols: | CCAAT-binding transcription factor (CBF-B/NF-YA) family protein | chr3:7326501-7328375 FORWARD	3012.45	2146.55
Brapa_ESTC027746	AT1G09770	Symbols: AtMYBCDC5, CDC5, ATCDC5 | ATCDC5 (Arabidopsis thaliana homolog of cdc5); DNA binding / transcription factor | chr1:3162004-3165124 FORWARD	5953.04	2145.4
Brapa_ESTC031580	AT1G64100	| Symbols: | DNA binding / binding | chr1:23795248-23799226 FORWARD	3076.12	2144.1
Brapa_ESTC021702	AT4G11660	Symbols: HSFB2B, AT-HSFB2B | AT-HSFB2B (Arabidopsis thaliana heat shock transcription factor B2B); transcription factor | chr4:7043000-7044221 FORWARD	2986.76	2139.54
Brapa_ESTC040621	AT1G78080	Symbols: RAP2.4 | RAP2.4 (related to AP2 4); DNA binding / transcription factor | chr1:29369683-29370687 FORWARD	4760.83	2137.84
Brapa_ESTC010833	AT4G36730	Symbols: GBF1 | GBF1 (G-box binding factor 1); transcription factor | chr4:17309854-17311756 REVERSE	3624.48	2134.7
Brapa_ESTC046597	AT5G65070	Symbols: FCL4, MAF4 | MAF4 (MADS AFFECTING FLOWERING 4); transcription factor | chr5:26009536-26013156 FORWARD	1175.39	2126.95
Brapa_ESTC018374	AT4G16420	Symbols: PRZ1, ADA2B | ADA2B (PROPORZ1); DNA binding / transcription factor | chr4:9262828-9265798 REVERSE	2365.87	2118.23
Brapa_ESTC010656	AT3G56850	Symbols: DPBF3, AREB3 | AREB3 (ABA-RESPONSIVE ELEMENT BINDING PROTEIN 3); DNA binding / transcription factor/ transcriptional activator | chr3:21057533-21058873 REVERSE	2133.69	2112.56
Brapa_ESTC030480	AT3G58710	Symbols: ATWRKY69, WRKY69 | WRKY69 (WRKY DNA-binding protein 69); transcription factor | chr3:21726169-21727743 FORWARD	2955.82	2110.18
Brapa_ESTC031589	AT1G63490	Symbols: | transcription factor jumonji (jmjC) domain-containing protein | chr1:23548603-23555611 REVERSE	2082.48	2110
Brapa_ESTC009512	AT3G15030	Symbols: MEE35, TCP4 | TCP4 (TCP family transcription factor 4, maternal effect embryo arrest 35); transcription factor | chr3:5062315-5063577 FORWARD	3478.29	2098.73
Brapa_ESTC004397	AT4G34680	Symbols: | GATA transcription factor 3, putative (GATA-3) | chr4:16553705-16554615 FORWARD	631.556	2094.43
Brapa_ESTC024862	AT3G54220	Symbols: SGR1, SCR | SCR (SCARECROW); transcription factor | chr3:20081528-20083603 FORWARD	2689.79	2079.3
Brapa_ESTC043758	AT3G54990	Symbols: SMZ | SMZ (SCHLAFMUTZE); DNA binding / transcription factor | chr3:20384695-20387499 REVERSE	1797.3	2077.56
Brapa_ESTC017559	AT2G45160	Symbols: | scarecrow transcription factor family protein | chr2:18625185-18627107 REVERSE	1761.97	2075.87
Brapa_ESTC027932	AT5G61590	Symbols: | AP2 domain-containing transcription factor family protein | chr5:24781879-24782484 REVERSE	2071.41	2072.64
Brapa_ESTC045808	AT5G17800	Symbols: AtMYB56 | AtMYB56 (myb domain protein 56); DNA binding / transcription factor | chr5:5877249-5879073 FORWARD	1509.38	2059.52
Brapa_ESTC038501	AT4G17380	Symbols: MSH4 | MSH4 (MUTS-LIKE PROTEIN 4); ATP binding / damaged DNA binding | chr4:9708754-9714080 FORWARD	982.344	2057.29
Brapa_ESTC038458	AT5G26170	Symbols: ATWRKY50, WRKY50 | WRKY50 (WRKY DNA-binding protein 50); transcription factor | chr5:9147179-9148131 REVERSE	832.156	2046.19
Brapa_ESTC018690	AT5G24120	Symbols: SIG5, SIGE | SIGE (RNA polymerase sigma subunit E); DNA binding / DNA-directed RNA polymerase/ sigma factor/ transcription factor | chr5:8157797-8159749 REVERSE	1409.22	2038.51
Brapa_ESTC043229	AT3G22320	Symbols: ATRPABC24.3 | ATRPABC24.3 ("Arabidopsis thaliana RNA polymerase I, II and III 24.3 kDa subunit"); DNA binding / DNA-directed RNA polymerase | chr3:7891052-7892101 REVERSE	1217.84	2036.07
Brapa_ESTC036030	AT5G16820	Symbols: HSFA1B, ATHSFA1B, HSF3 | HSF3 (HEAT SHOCK FACTOR 3); DNA binding / transcription factor | chr5:5530449-5532500 FORWARD	822.856	2032.24
Brapa_ESTC049548	AT2G37550	Symbols: AGD7, ASP1 | ASP1 (PDE1 SUPPRESSOR 1); DNA binding | chr2:15762622-15764534 REVERSE	2510.48	2031.72
Brapa_ESTC022890	AT5G05550	| Symbols: | transcription factor | chr5:1639530-1640551 REVERSE	1712.73	2029.01
Brapa_ESTC022738	AT3G50410	Symbols: OBP1 | OBP1 (OBF BINDING PROTEIN 1); DNA binding / transcription factor | chr3:18720853-18721614 FORWARD	1788.87	2024.12
Brapa_ESTC037849	AT1G73730	Symbols: SLIM1, EIL3 | EIL3 (ETHYLENE-INSENSITIVE3-LIKE3); transcription factor | chr1:27734095-27736024 REVERSE	3226.56	2020.8
Brapa_ESTC045888	AT5G39660	Symbols: CDF2 | CDF2 (CYCLING DOF FACTOR 2); DNA binding / transcription factor | chr5:15896148-15897940 FORWARD	1320.88	2019.65
Brapa_ESTC039932	AT1G21700	Symbols: CHB4, ATSWI3C | ATSWI3C (Arabidopsis thaliana switching protein 3C); DNA binding | chr1:7620145-7623967 REVERSE	3482.36	2019.53
Brapa_ESTC008761	AT1G32640	Symbols: RD22BP1, JAI1, JIN1, MYC2, ZBF1, ATMYC2 | ATMYC2 (JASMONATE INSENSITIVE 1); DNA binding / transcription factor | chr1:11799022-11800893 REVERSE	2396.17	2010.99
Brapa_ESTC043070	AT3G16350	| Symbols: | myb family transcription factor |	1640.97	2008.78
Brapa_ESTC032867	AT2G33720	| Symbols: | transcription factor | chr2:14270852-14272065 FORWARD	1058.13	2008.63
Brapa_ESTC025145	AT1G20980	Symbols: FBR6, SPL1R2, ATSPL14, SPL14 | SPL14 (SQUAMOSA PROMOTER BINDING PROTEIN-LIKE 14); DNA binding / transcription factor | chr1:7325031-7328922 FORWARD	4263.29	2005.96
Brapa_ESTC013605	AT3G09360	Symbols: | RNA polymerase II transcription factor | chr3:2873802-2878438 FORWARD	1172.18	2002.71
Brapa_ESTC032870	AT2G33810	Symbols: SPL3 | SPL3 (SQUAMOSA PROMOTER BINDING PROTEIN-LIKE 3); transcription factor | chr2:14312418-14312904 FORWARD	3108.6	2000.43
Brapa_ESTC031549	AT1G28310	| Symbols: | DNA binding | chr1:9912521-9913672 REVERSE	2414.53	1989.62
Brapa_ESTC016734	AT3G52250	Symbols: | myb family transcription factor | chr3:19387607-19394078 FORWARD	5118.83	1988.12
Brapa_ESTC032979	AT5G60120	Symbols: TOE2 | TOE2 (TARGET OF EAT1 2); DNA binding / transcription factor | chr5:24225379-24228293 FORWARD	1249.06	1984.76
Brapa_ESTC022590	AT3G17100	| Symbols: | transcription factor | chr3:5831558-5832250 FORWARD	1826.35	1981.69
Brapa_ESTC026094	AT1G03280	Symbols: | transcription initiation factor IIE (TFIIE) alpha subunit family protein / general transcription factor TFIIE family protein | chr1:803635-806758 FORWARD	1451.66	1977.34
Brapa_ESTC027811	AT5G23420	Symbols: HMGB6 | HMGB6 (High mobility group B 6); transcription factor | chr5:7888715-7890114 REVERSE	564.908	1976.58
Brapa_ESTC019136	AT3G10800	Symbols: | bZIP transcription factor family protein | chr3:3379331-3381435 FORWARD	4365.91	1966.17
Brapa_ESTC011138	AT2G46020	Symbols: ATBRM, CHR2, BRM | ATBRM/CHR2 (ARABIDOPSIS THALIANA BRAHMA); ATP binding / DNA binding / helicase/ transcription regulator | chr2:18930377-18938842 FORWARD	3937.68	1958.35
Brapa_ESTC005284	AT4G13980	Symbols: HSFA5, AT-HSFA5 | AT-HSFA5 (Arabidopsis thaliana heat shock transcription factor A5); DNA binding / transcription factor | chr4:8077514-8079242 REVERSE	2913.11	1956.78
Brapa_ESTC037969	AT2G37260	Symbols: ATWRKY44, WRKY44, TTG2 | TTG2 (TRANSPARENT TESTA GLABRA 2); transcription factor | chr2:15652682-15653871 FORWARD	764.471	1954.51
Brapa_ESTC021043	AT3G60590	| Symbols: | DNA binding | chr3:22409739-22410728 FORWARD	3884.92	1950.58
Brapa_ESTC014981	AT4G18880	Symbols: HSFA4A, AT-HSFA4A | AT-HSFA4A (Arabidopsis thaliana heat shock transcription factor A4A); DNA binding / transcription factor | chr4:10347780-10349062 REVERSE	2314.48	1947.59
Brapa_ESTC022185	AT2G47520	Symbols: | AP2 domain-containing transcription factor, putative | chr2:19509961-19510560 REVERSE	1948.5	1947.24
Brapa_ESTC021440	AT5G54680	Symbols: ILR3 | ILR3 (IAA-LEUCINE RESISTANT3); DNA binding / transcription factor | chr5:22234496-22236219 FORWARD	5804.56	1945.61
Brapa_ESTC025416	AT5G06710	Symbols: HAT14 | HAT14 (homeobox-leucine zipper protein 14); DNA binding | chr5:2069094-2070285 REVERSE	10934.4	1943.99
Brapa_ESTC019403	AT2G20350	Symbols: | AP2 domain-containing transcription factor, putative | chr2:8791850-8792477 FORWARD	2474.84	1937.22
Brapa_ESTC002144	AT3G21270	Symbols: ADOF2 | ADOF2 (Arabidopsis dof zinc finger protein 2); DNA binding / transcription factor | chr3:7474940-7475554 FORWARD	517.62	1937.13
Brapa_ESTC035672	AT4G21430	Symbols: B160 | B160; transcription factor | chr4:11407846-11412170 REVERSE	1027.35	1936.65
Brapa_ESTC038380	AT4G17020	Symbols: | transcription factor-related | chr4:9578171-9581101 REVERSE	830.364	1935.31
Brapa_ESTC039663	AT1G16970	Symbols: KU70, ATKU70 | ATKU70/KU70 (Arabidopsis thaliana Ku70 homolog); double-stranded DNA binding / protein binding | chr1:5801152-5805717 REVERSE	1127.21	1933.32
Brapa_ESTC031976	AT3G25890	Symbols: | AP2 domain-containing transcription factor, putative | chr3:9477289-9478287 FORWARD	3808.62	1932.97
Brapa_ESTC007789	AT4G01550	Symbols: ANAC069 | ANAC069 (Arabidopsis NAC domain containing protein 69); transcription factor | chr4:674025-676225 REVERSE	1154.37	1932.68
Brapa_ESTC031721	AT5G56860	Symbols: GNC | GNC (GATA, NITRATE-INDUCIBLE, CARBON METABOLISM-INVOLVED); transcription factor | chr5:23006856-23008577 REVERSE	1001.75	1930.09
Brapa_ESTC049449	AT1G08620	Symbols: | transcription factor jumonji (jmj) family protein / zinc finger (C5HC2 type) family protein | chr1:2737557-2743373 FORWARD	2268.05	1926.82
Brapa_ESTC051029	AT1G49950	Symbols: ATTRB1, TRB1 | ATTRB1/TRB1 (TELOMERE REPEAT BINDING FACTOR 1); DNA binding / transcription factor | chr1:18498107-18500381 REVERSE	395.765	1917.6
Brapa_ESTC006927	AT5G56950	Symbols: NAP1;3 | NAP1;3 (NUCLEOSOME ASSEMBLY PROTEIN1;3); DNA binding | chr5:23049844-23052525 FORWARD	3245.93	1915.29
Brapa_ESTC015329	AT5G63790	Symbols: ANAC102 | ANAC102 (Arabidopsis NAC domain containing protein 102); transcription factor | chr5:25544113-25545239 REVERSE	1744.06	1914.6
Brapa_ESTC019526	AT3G24120	Symbols: | myb family transcription factor | chr3:8705932-8708155 REVERSE	2719.74	1911.81
Brapa_ESTC017812	AT1G69180	Symbols: CRC | CRC (CRABS CLAW); transcription factor | chr1:26011397-26012603 REVERSE	2939.9	1911.1
Brapa_ESTC012740	AT4G36990	Symbols: HSFB1, AT-HSFB1, ATHSF4, HSF4 | HSF4 (HEAT SHOCK FACTOR 4); DNA binding / transcription factor | chr4:17440654-17441700 FORWARD	5167.08	1907.92
Brapa_ESTC033419	AT3G09360	Symbols: | RNA polymerase II transcription factor | chr3:2873802-2878438 FORWARD	884.872	1907.52
Brapa_ESTC021381	AT3G58120	Symbols: | bZIP transcription factor family protein | chr3:21532266-21534055 REVERSE	3841.8	1903.27
Brapa_ESTC047297	AT1G49950	Symbols: ATTRB1, TRB1 | ATTRB1/TRB1 (TELOMERE REPEAT BINDING FACTOR 1); DNA binding / transcription factor | chr1:18498107-18500381 REVERSE	399.996	1902.13
Brapa_ESTC017798	AT4G39780	Symbols: | AP2 domain-containing transcription factor, putative | chr4:18458210-18459028 REVERSE	1712.97	1898.8
Brapa_ESTC027724	AT1G28360	Symbols: ERF12, ATERF12 | ATERF12/ERF12 (ERF domain protein 12); DNA binding / transcription factor/ transcriptional repressor | chr1:9951921-9952490 FORWARD	1727.31	1897.58
Brapa_ESTC039384	AT1G08600	Symbols: ATRX, CHR20 | ATRX/CHR20; ATP binding / DNA binding / helicase | chr1:2724565-2733434 FORWARD	1342.35	1890.03
Brapa_ESTC046598	AT5G65070	Symbols: FCL4, MAF4 | MAF4 (MADS AFFECTING FLOWERING 4); transcription factor | chr5:26009536-26013156 FORWARD	1620.34	1882.78
Brapa_ESTC013193	AT3G12250	Symbols: BZIP45, TGA6 | TGA6 (TGA1a-related gene 6); DNA binding / transcription factor | chr3:3906358-3908590 FORWARD	1749.34	1877.57
Brapa_ESTC016098	AT3G11280	Symbols: | myb family transcription factor | chr3:3533483-3534399 REVERSE	3453.77	1877.54
Brapa_ESTC027233	AT3G60590	| Symbols: | DNA binding | chr3:22409739-22410728 FORWARD	3544.1	1875.96
Brapa_ESTC032510	AT4G00670	| Symbols: | DNA binding | chr4:278434-279170 REVERSE	1399.51	1875.96
Brapa_ESTC013143	AT3G54810	Symbols: BME3-ZF, BME3 | BME3/BME3-ZF (BLUE MICROPLYLAR END3); transcription factor | chr3:20307935-20309214 FORWARD	3865.33	1874.19
Brapa_ESTC010704	AT1G61110	Symbols: ANAC025 | ANAC025 (Arabidopsis NAC domain containing protein 25); transcription factor | chr1:22520395-22521720 FORWARD	757.737	1873.52
Brapa_ESTC010580	AT1G30970	Symbols: SUF4 | SUF4 (SUPPRESSOR OF FRIGIDA4); transcription factor | chr1:11040594-11043574 REVERSE	5363.87	1872.02
Brapa_ESTC015893	AT1G19850	Symbols: ARF5, IAA24, MP | MP (MONOPTEROS); transcription factor | chr1:6887344-6891173 FORWARD	1676.91	1871.31
Brapa_ESTC031257	AT4G39780	Symbols: | AP2 domain-containing transcription factor, putative | chr4:18458210-18459028 REVERSE	1966.47	1870.79
Brapa_ESTC033423	AT3G09230	Symbols: AtMYB1, ATMYB1 | ATMYB1 (myb domain protein 1); DNA binding / transcription factor | chr3:2833466-2835140 FORWARD	2826.3	1868.86
Brapa_ESTC008490	AT4G38900	| Symbols: | DNA binding | chr4:18139558-18141514 REVERSE	4991.75	1868.45
Brapa_ESTC026404	AT1G20980	Symbols: FBR6, SPL1R2, ATSPL14, SPL14 | SPL14 (SQUAMOSA PROMOTER BINDING PROTEIN-LIKE 14); DNA binding / transcription factor | chr1:7325031-7328922 FORWARD	4767.41	1867.43
Brapa_ESTC011747	AT1G68670	Symbols: | myb family transcription factor | chr1:25786007-25787536 FORWARD	1730.67	1863.74
Brapa_ESTC040439	AT1G69490	Symbols: ANAC029, ATNAP, NAP | NAP (NAC-LIKE, ACTIVATED BY AP3/PI); transcription factor | chr1:26125896-26126885 FORWARD	2208.6	1860.6
Brapa_ESTC037071	AT5G08520	Symbols: | myb family transcription factor | chr5:2755471-2757742 REVERSE	3342.69	1860.13
Brapa_ESTC008511	AT2G02540	Symbols: ATHB21, ZFHD4 | ATHB21/ZFHD4 (ZINC FINGER HOMEODOMAIN 4); DNA binding / transcription factor | chr2:684301-685233 FORWARD	505.963	1858.16
Brapa_ESTC028169	AT1G18340	Symbols: | basal transcription factor complex subunit-related | chr1:6311605-6313727 REVERSE	1513.36	1856.7
Brapa_ESTC041765	AT2G37550	Symbols: AGD7, ASP1 | ASP1 (PDE1 SUPPRESSOR 1); DNA binding | chr2:15762622-15764534 REVERSE	2329.07	1853.36
Brapa_ESTC009916	AT2G02070	Symbols: ATIDD5 | ATIDD5 (ARABIDOPSIS THALIANA INDETERMINATE(ID)-DOMAIN 5); nucleic acid binding / transcription factor/ zinc ion binding | chr2:505522-509153 FORWARD	2574.88	1853.29
Brapa_ESTC024842	AT5G01900	Symbols: ATWRKY62, WRKY62 | WRKY62 (WRKY DNA-binding protein 62); transcription factor | chr5:351133-352010 REVERSE	4654.76	1848.84
Brapa_ESTC003176	AT3G23050	Symbols: AXR2, IAA7 | IAA7 (AUXIN RESISTANT 2); transcription factor | chr3:8194775-8196723 FORWARD	1907.19	1846
Brapa_ESTC038615	AT2G36720	Symbols: | PHD finger transcription factor, putative | chr2:15400526-15406268 FORWARD	1271.29	1845.08
Brapa_ESTC047926	AT3G11100	| Symbols: | transcription factor | chr3:3476496-3477326 REVERSE	1928.78	1837.72
Brapa_ESTC012180	AT2G37060	Symbols: | CCAAT-box binding transcription factor, putative | chr2:15583415-15584739 FORWARD	2940.91	1835.33
Brapa_ESTC046397	AT5G58340	| Symbols: | DNA binding | chr5:23599833-23601471 FORWARD	1895.44	1832.83
Brapa_ESTC026814	AT4G00050	Symbols: UNE10 | UNE10 (unfertilized embryo sac 10); DNA binding / transcription factor | chr4:17863-19848 FORWARD	1579.36	1832.59
Brapa_ESTC040458	AT1G69580	| Symbols: | transcription factor | chr1:26175790-26177275 FORWARD	1129.34	1827
Brapa_ESTC044790	AT4G32280	Symbols: IAA29 | IAA29 (indoleacetic acid-induced protein 29); transcription factor | chr4:15583485-15584634 FORWARD	1405.24	1825.07
Brapa_ESTC046611	AT5G62470	Symbols: mybcov1, AtMYB96, MYB96 | MYB96 (myb domain protein 96); DNA binding / transcription factor | chr5:25096660-25098084 REVERSE	2315	1821.54
Brapa_ESTC006282	AT1G69010	Symbols: BIM2 | BIM2 (BES1-INTERACTING MYC-LIKE PROTEIN 2); DNA binding / transcription factor | chr1:25945467-25947262 FORWARD	1072.29	1821.1
Brapa_ESTC014494	AT2G47070	Symbols: SPL1 | SPL1 (SQUAMOSA PROMOTER BINDING PROTEIN-LIKE 1); DNA binding / transcription factor | chr2:19344214-19347622 FORWARD	1460.28	1813.38
Brapa_ESTC001971	AT2G24570	Symbols: ATWRKY17, WRKY17 | WRKY17 (WRKY DNA-binding protein 17); transcription factor | chr2:10444755-10446301 REVERSE	5182.93	1795.66
Brapa_ESTC022855	AT3G19290	Symbols: AREB2, ABF4 | ABF4 (ABRE BINDING FACTOR 4); DNA binding / transcription factor/ transcriptional activator | chr3:6687962-6689790 FORWARD	2671.57	1791.73
Brapa_ESTC031788	AT3G29020	Symbols: AtMYB110, MYB110 | MYB110 (myb domain protein 110); DNA binding / transcription factor | chr3:11009851-11010650 REVERSE	1540.72	1784.94
Brapa_ESTC027929	AT5G52660	Symbols: | myb family transcription factor | chr5:21376649-21379263 REVERSE	1932.49	1783.52
Brapa_ESTC004179	AT5G17300	Symbols: | myb family transcription factor | chr5:5690437-5692437 REVERSE	715.163	1779.13
Brapa_ESTC010473	AT3G05690	Symbols: UNE8, ATHAP2B, HAP2, HAP2B | HAP2B (Heme activator protein (yeast) homolog 2B, unfertilized embryo sac 8); transcription factor | chr3:1676928-1678330 REVERSE	997.481	1777.73
Brapa_ESTC014422	AT2G43000	Symbols: ANAC042 | ANAC042 (Arabidopsis NAC domain containing protein 42); transcription factor | chr2:17887694-17889661 REVERSE	1268.35	1776.61
Brapa_ESTC003073	AT4G32800	Symbols: | AP2 domain-containing transcription factor TINY, putative | chr4:15819816-15820481 FORWARD	925.817	1771.58
Brapa_ESTC012189	AT5G60850	Symbols: OBP4 | OBP4 (OBF BINDING PROTEIN 4); DNA binding / transcription factor | chr5:24497804-24498727 FORWARD	2271.88	1768.61
Brapa_ESTC027884	AT4G23810	Symbols: ATWRKY53, WRKY53 | WRKY53 (WRKY DNA-binding protein 53); transcription factor | chr4:12392676-12393749 REVERSE	1385.59	1766.66
Brapa_ESTC006023	AT2G17040	Symbols: ANAC036 | ANAC036 (Arabidopsis NAC domain containing protein 36); transcription factor | chr2:7414205-7415202 FORWARD	702.93	1764.62
Brapa_ESTC034521	AT5G18830	Symbols: SPL7 | SPL7 (SQUAMOSA PROMOTER BINDING PROTEIN-LIKE 7); DNA binding / transcription factor | chr5:6276118-6280229 FORWARD	3470.16	1761.6
Brapa_ESTC010399	AT5G06250	| Symbols: | transcription factor | chr5:1892715-1894059 REVERSE	1703.13	1760.24
Brapa_ESTC034131	AT4G36990	Symbols: HSFB1, AT-HSFB1, ATHSF4, HSF4 | HSF4 (HEAT SHOCK FACTOR 4); DNA binding / transcription factor | chr4:17440654-17441700 FORWARD	6329.07	1758.3
Brapa_ESTC015736	AT5G53200	Symbols: TRY | TRY (TRIPTYCHON); DNA binding / transcription factor | chr5:21600139-21601186 FORWARD	1051.44	1755.84
Brapa_ESTC014424	AT4G08350	Symbols: | KOW domain-containing transcription factor family protein | chr4:5286348-5292069 FORWARD	2533.54	1754.55
Brapa_ESTC024417	AT1G68670	Symbols: | myb family transcription factor | chr1:25786007-25787536 FORWARD	2236.95	1752.77
Brapa_ESTC024425	AT2G40340	Symbols: | AP2 domain-containing transcription factor, putative (DRE2B) | chr2:16855743-16857435 REVERSE	17837.7	1749.92
Brapa_ESTC004225	AT3G47620	Symbols: | TCP family transcription factor, putative | chr3:17569989-17571458 FORWARD	4142.54	1744.88
Brapa_ESTC044922	AT4G32800	Symbols: | AP2 domain-containing transcription factor TINY, putative | chr4:15819816-15820481 FORWARD	529.135	1742.76
Brapa_ESTC001070	AT4G17230	Symbols: SCL13 | SCL13 (SCARECROW-LIKE 13); transcription factor | chr4:9661405-9662268 REVERSE	7264.47	1739.41
Brapa_ESTC040588	AT1G76890	Symbols: AT-GT2, GT2 | GT2 (GT2); transcription factor | chr1:28878105-28880097 REVERSE	1642.62	1738.52
Brapa_ESTC034032	AT5G22220	Symbols: E2FB, ATE2FB, E2F1 | E2F1; transcription factor | chr5:7360752-7364123 FORWARD	2297.87	1726.44
Brapa_ESTC011986	AT3G46640	Symbols: LUX, PCL1 | PCL1 (PHYTOCLOCK 1); DNA binding | chr3:17194233-17195204 FORWARD	10307.3	1719.63
Brapa_ESTC001961	AT5G04340	Symbols: C2H2 | C2H2; nucleic acid binding / transcription factor/ zinc ion binding | chr5:1216322-1217038 REVERSE	10502.7	1718.48
Brapa_ESTC021630	AT5G51910	Symbols: | TCP family transcription factor, putative | chr5:21111930-21112811 REVERSE	1565.24	1718.05
Brapa_ESTC041599	AT2G31230	Symbols: ATERF15 | ATERF15 (ETHYLENE-RESPONSIVE ELEMENT BINDING FACTOR 15); DNA binding / transcription factor/ transcriptional activator | chr2:13313753-13314484 REVERSE	2094.09	1710.92
Brapa_ESTC008760	AT3G47620	Symbols: | TCP family transcription factor, putative | chr3:17569989-17571458 FORWARD	3507.67	1710.91
Brapa_ESTC036727	AT1G54160	Symbols: | CCAAT-binding transcription factor (CBF-B/NF-YA) family protein | chr1:20221248-20222373 REVERSE	898.729	1708.52
Brapa_ESTC008184	AT1G75390	Symbols: ATBZIP44 | bZIP transcription factor family protein | chr1:28295885-28296406 FORWARD	4382.43	1707.63
Brapa_ESTC033662	AT1G71130	Symbols: | AP2 domain-containing transcription factor, putative | chr1:26826539-26827024 FORWARD	1705.93	1701.23
Brapa_ESTC020678	AT3G60490	Symbols: | AP2 domain-containing transcription factor TINY, putative | chr3:22360502-22361272 FORWARD	574.787	1701.01
Brapa_ESTC026519	AT1G06070	Symbols: | bZIP transcription factor, putative (bZIP69) | chr1:1835200-1837115 REVERSE	3404.76	1700.53
Brapa_ESTC012644	AT1G18340	Symbols: | basal transcription factor complex subunit-related | chr1:6311605-6313727 REVERSE	2719.78	1690.02
Brapa_ESTC024026	AT3G14020	Symbols: | CCAAT-binding transcription factor (CBF-B/NF-YA) family protein | chr3:4642975-4644308 FORWARD	911.767	1689.72
Brapa_ESTC016129	AT5G07690	Symbols: AtMYB29, MYB29 | MYB29 (myb domain protein 29); DNA binding / transcription factor | chr5:2447091-2448286 FORWARD	1598.77	1681.28
Brapa_ESTC026285	AT2G44745	Symbols: | WRKY family transcription factor | chr2:18454557-18456079 REVERSE	863.251	1675.26
Brapa_ESTC043036	AT3G16857	Symbols: ARR1 | ARR1 (ARABIDOPSIS RESPONSE REGULATOR 1); transcription factor/ two-component response regulator | chr3:5756119-5759145 FORWARD	5931.36	1662.23
Brapa_ESTC044270	AT4G18170	Symbols: ATWRKY28, WRKY28 | WRKY28 (WRKY DNA-binding protein 28); transcription factor | chr4:10061519-10062702 FORWARD	3521.61	1659.19
Brapa_ESTC031283	AT5G47220	Symbols: ATERF2, ATERF-2, ERF2 | ATERF-2/ATERF2/ERF2 (ETHYLENE RESPONSE FACTOR 2); DNA binding / transcription factor/ transcriptional activator | chr5:19189250-19189981 REVERSE	1466.06	1657.98
Brapa_ESTC007575	AT3G20770	Symbols: EIN3 | EIN3 (ETHYLENE-INSENSITIVE3); transcription factor | chr3:7260708-7262594 REVERSE	1867.65	1656.68
Brapa_ESTC020480	AT1G57820	Symbols: VIM1 | VIM1 (VARIANT IN METHYLATION 1); DNA binding | chr1:21418007-21421567 REVERSE	1609.48	1644.92
Brapa_ESTC022604	AT4G36730	Symbols: GBF1 | GBF1 (G-box binding factor 1); transcription factor | chr4:17309854-17311756 REVERSE	3244.01	1644.59
Brapa_ESTC021568	AT1G50420	Symbols: SCL3 | SCL3 (SCARECROW-LIKE 3); transcription factor | chr1:18681845-18683293 REVERSE	3694.01	1644.32
Brapa_ESTC028704	AT2G37060	Symbols: | CCAAT-box binding transcription factor, putative | chr2:15583415-15584739 FORWARD	2871.22	1643.59
Brapa_ESTC024972	AT4G35240	Symbols: | similar to unknown protein [Arabidopsis thaliana] (TAIR:AT2G17110.1); similar to Os09g0547300 [Oryza sativa (japonica cultivar-group)] (GB:NP_001063849.1); similar to bzip-related transcription factor -like [Oryza sativa (japonica cultivar-group)] (GB:BAD46467.1); contains InterPro domain Protein of unknown function DUF632; (InterPro:IPR006867); contains InterPro domain Protein of unkn…	2713.16	1638.35
Brapa_ESTC014624	AT5G01200	Symbols: | myb family transcription factor | chr5:77115-78293 FORWARD	2993.65	1637.93
Brapa_ESTC027048	AT4G34590	Symbols: ATBZIP11, ATB2, BZIP11, GBF6 | GBF6 (G-box binding factor 6); DNA binding / transcription factor | chr4:16522454-16522933 FORWARD	1406.46	1636.8
Brapa_ESTC000695	AT5G47370	Symbols: HAT2 | HAT2; transcription factor | chr5:19233709-19234874 REVERSE	1642.88	1636.6
Brapa_ESTC027266	AT1G02340	Symbols: RSF1, FBI1, REP1, HFR1 | HFR1 (LONG HYPOCOTYL IN FAR-RED); DNA binding / transcription factor | chr1:465933-467685 REVERSE	1554.61	1636.2
Brapa_ESTC014873	AT4G34590	Symbols: ATBZIP11, ATB2, BZIP11, GBF6 | GBF6 (G-box binding factor 6); DNA binding / transcription factor | chr4:16522454-16522933 FORWARD	1803.83	1630.37
Brapa_ESTC008317	AT1G01250	Symbols: | AP2 domain-containing transcription factor, putative | chr1:104731-105309 REVERSE	1555.38	1630.06
Brapa_ESTC003498	AT1G12400	Symbols: | similar to Os07g0573600 [Oryza sativa (japonica cultivar-group)] (GB:NP_001060068.1); similar to novel protein similar to vertebrate TFIIH basal transcription factor complex TTDA subunit (C6orf175) [Danio rerio] (GB:CAI20614.1); similar to Os05g0198700 [Oryza sativa (japonica cultivar-group)] (GB:NP_001054876.1); contains InterPro domain REX1 DNA Repair; (InterPro:IPR009400) | chr1:422…	2500.92	1628.52
Brapa_ESTC011186	AT2G47460	Symbols: MYB12, AtMYB12 | MYB12 (myb domain protein 12); DNA binding / transcription factor/ transcriptional activator | chr2:19483508-19486312 FORWARD	2019.24	1623.53
Brapa_ESTC022024	AT1G67500	Symbols: ATREV3 | ATREV3 (Arabidopsis thaliana recovery protein 3); DNA binding | chr1:25291370-25300377 REVERSE	1394	1620.9
Brapa_ESTC013525	AT4G31270	| Symbols: | transcription factor | chr4:15183297-15184509 REVERSE	812.29	1619.91
Brapa_ESTC002127	AT1G08970	Symbols: HAP5C | HAP5C (HEME ACTIVATED PROTEIN 5C); DNA binding / transcription factor | chr1:2883147-2883842 FORWARD	3290.51	1617.54
Brapa_ESTC044788	AT4G32040	Symbols: KNAT5 | KNAT5 (KNOTTED1-LIKE HOMEOBOX GENE 5); transcription factor | chr4:15494133-15496015 FORWARD	4607.24	1616.39
Brapa_ESTC015811	AT1G19220	Symbols: IAA22, ARF11, ARF19 | ARF19 (AUXIN RESPONSE FACTOR 11); transcription factor | chr1:6628386-6632770 REVERSE	2104.92	1616.36
Brapa_ESTC009081	AT2G44940	Symbols: | AP2 domain-containing transcription factor TINY, putative | chr2:18544369-18545256 FORWARD	826.487	1614.08
Brapa_ESTC018364	AT5G54310	Symbols: AGD5 | AGD5 (ARF-GAP DOMAIN 5); DNA binding | chr5:22074488-22078292 REVERSE	5736.14	1613.3
Brapa_ESTC048225	AT4G36900	Symbols: RAP2.10 | RAP2.10 (related to AP2 10); DNA binding / transcription factor | chr4:17389012-17389602 FORWARD	4503.74	1607.22
Brapa_ESTC032560	AT1G33760	Symbols: | AP2 domain-containing transcription factor, putative | chr1:12237924-12238478 FORWARD	1123.23	1605.09
Brapa_ESTC007565	AT5G64340	Symbols: SAC51 | SAC51 (SUPPRESSOR OF ACAULIS 51); transcription factor/ transcription regulator | chr5:25748116-25749162 REVERSE	1821.38	1602.85
Brapa_ESTC041551	AT2G30470	Symbols: HSI2 | HSI2 (High-level expression of Sugar-Inducible gene 2); transcription factor/ transcriptional repressor | chr2:12987981-12991801 REVERSE	1216.49	1602.54
Brapa_ESTC001675	AT4G17810	Symbols: | nucleic acid binding / transcription factor/ zinc ion binding | chr4:9906931-9907545 FORWARD	442.213	1601.14
Brapa_ESTC003847	AT3G20740	Symbols: FIS3, FIE1, FIE | FIE (FERTILIZATION-INDEPENDENT ENDOSPERM 1); nucleotide binding / transcription factor | chr3:7249070-7252260 REVERSE	1007.01	1598.59
Brapa_ESTC004343	AT4G16420	Symbols: PRZ1, ADA2B | ADA2B (PROPORZ1); DNA binding / transcription factor | chr4:9262828-9265798 REVERSE	286.24	1593.33
Brapa_ESTC032962	AT4G31060	Symbols: | AP2 domain-containing transcription factor, putative | chr4:15116902-15117465 FORWARD	381.956	1581.61
Brapa_ESTC002318	AT3G14230	Symbols: RAP2.2 | RAP2.2; DNA binding / transcription factor | chr3:4737623-4739007 REVERSE	3602.46	1579.73
Brapa_ESTC039736	AT1G19490	Symbols: | bZIP transcription factor family protein | chr1:6751944-6753950 REVERSE	1900.45	1578.27
Brapa_ESTC015035	AT1G72010	Symbols: | TCP family transcription factor, putative | chr1:27111506-27112633 FORWARD	3583.4	1572.5
Brapa_ESTC004980	AT4G18020	Symbols: PRR2, APRR2 | APRR2 (PSEUDO-RESPONSE REGULATOR 2); transcription factor | chr4:10003750-10006694 REVERSE	3407.24	1570.94
Brapa_ESTC012280	AT5G67580	Symbols: TRB2, ATTRB2 | ATTRB2/TRB2 (TELOMERE REPEAT BINDING FACTOR 2); DNA binding / transcription factor | chr5:26973069-26974299 REVERSE	1742.53	1554.64
Brapa_ESTC040927	AT1G52830	Symbols: SHY1, IAA6 | IAA6 (indoleacetic acid-induced protein 6); transcription factor | chr1:19676338-19677227 REVERSE	1367.71	1554.42
Brapa_ESTC020193	AT5G13790	Symbols: AGL15 | AGL15 (AGAMOUS-LIKE 15); DNA binding / transcription factor | chr5:4449131-4450805 REVERSE	571.116	1552.22
Brapa_ESTC026639	AT3G22880	Symbols: DMC1, ATDMC1 | ATDMC1 (RECA-LIKE GENE); ATP binding / DNA-dependent ATPase/ damaged DNA binding | chr3:8097955-8100747 REVERSE	1751.4	1549.01
Brapa_ESTC051182	AT5G08520	| Symbols: | myb family transcription factor |	2069.56	1548.04
Brapa_ESTC035154	AT4G32280	Symbols: IAA29 | IAA29 (indoleacetic acid-induced protein 29); transcription factor | chr4:15583485-15584634 FORWARD	1103.95	1547.09
Brapa_ESTC022724	AT2G02730	Symbols: | similar to bZIP family transcription factor [Arabidopsis thaliana] (TAIR:AT1G27000.1); similar to bZIP transcription factor bZIP109 [Glycine max] (GB:ABI34660.1); contains InterPro domain Protein of unknown function DUF1664; (InterPro:IPR012458) | chr2:765279-767335 REVERSE	929.305	1547.06
Brapa_ESTC036802	AT4G35800	Symbols: RNA_POL_II_LSRNA_POL_II_LS, RNA_POL_II_LS, RPB1, NRPB1 | NRPB1 (RNA POLYMERASE II LARGE SUBUNIT); DNA binding / DNA-directed RNA polymerase | chr4:16961119-16967896 REVERSE	4219.6	1544.69
Brapa_ESTC034601	AT2G45160	Symbols: | scarecrow transcription factor family protein | chr2:18625185-18627107 REVERSE	2560.64	1535.71
Brapa_ESTC012497	AT1G69690	Symbols: | TCP family transcription factor, putative | chr1:26220112-26221089 FORWARD	976.361	1534.33
Brapa_ESTC022893	AT4G24470	Symbols: ZIM | ZIM (ZINC-FINGER PROTEIN EXPRESSED IN INFLORESCENCE MERISTEM); transcription factor | chr4:12645795-12647744 FORWARD	1542.33	1528.53
Brapa_ESTC020201	AT5G45710	Symbols: HSFA4C, RHA1, AT-HSFA4C | AT-HSFA4C (Arabidopsis thaliana heat shock transcription factor A4C); DNA binding / transcription factor | chr5:18558803-18559933 FORWARD	2519.13	1524.07
Brapa_ESTC024905	AT2G43140	Symbols: | DNA binding / transcription factor | chr2:17939453-17942716 REVERSE	1770.3	1523.82
Brapa_ESTC011418	AT5G54680	Symbols: ILR3 | ILR3 (IAA-LEUCINE RESISTANT3); DNA binding / transcription factor | chr5:22234496-22236219 FORWARD	3525.58	1523.26
Brapa_ESTC014765	AT5G63470	| Symbols: | DNA binding | chr5:25433558-25434310 REVERSE	1900.38	1522.11
Brapa_ESTC051513	AT1G28310	| Symbols: | DNA binding | chr1:9912521-9913672 REVERSE	4937.41	1520.64
Brapa_ESTC016961	AT3G52280	Symbols: GTE6 | GTE6 (GENERAL transcription factor GROUP E6); DNA binding | chr3:19400081-19402267 REVERSE	1161.42	1519.42
Brapa_ESTC002299	AT5G67300	Symbols: AtMYBr1, AtMYB44 | AtMYB44/AtMYBr1 (myb domain protein 44, myb domain protein r1); DNA binding / transcription factor | chr5:26871335-26872252 FORWARD	1316.56	1516.33
Brapa_ESTC016151	AT3G04070	Symbols: ANAC047 | ANAC047 (Arabidopsis NAC domain containing protein 47); transcription factor | chr3:1061580-1062983 REVERSE	2055.77	1515.41
Brapa_ESTC042801	AT3G07610	Symbols: | transcription factor jumonji (jmjC) domain-containing protein | chr3:2426154-2429364 FORWARD	4928.83	1514.06
Brapa_ESTC024641	AT3G12810	Symbols: SRCAP, CHR13, PIE1 | PIE1 (PHOTOPERIOD-INDEPENDENT EARLY FLOWERING 1); ATP binding / DNA binding / helicase | chr3:4065643-4073999 FORWARD	2533.9	1509.72
Brapa_ESTC010279	AT3G49850	Symbols: TRB3, ATTRB3 | ATTRB3/TRB3 (TELOMERE REPEAT BINDING FACTOR 1); DNA binding / transcription factor | chr3:18500436-18501716 FORWARD	2205.85	1506.75
Brapa_ESTC023254	AT1G78080	Symbols: RAP2.4 | RAP2.4 (related to AP2 4); DNA binding / transcription factor | chr1:29369683-29370687 FORWARD	4951.35	1496.6
Brapa_ESTC007065	AT1G74840	Symbols: | myb family transcription factor | chr1:28119862-28120978 REVERSE	2479.49	1495.03
Brapa_ESTC021280	AT2G35700	Symbols: | AP2 domain-containing transcription factor, putative | chr2:15012284-15012868 FORWARD	2518.96	1493.32
Brapa_ESTC011277	AT3G58630	| Symbols: | transcription factor | chr3:21694905-21696748 REVERSE	1456.89	1487.61
Brapa_ESTC023133	AT1G10120	Symbols: | DNA binding / transcription factor | chr1:3304230-3305986 REVERSE	847.307	1487.49
Brapa_ESTC039125	AT4G35240	Symbols: | similar to unknown protein [Arabidopsis thaliana] (TAIR:AT2G17110.1); similar to Os09g0547300 [Oryza sativa (japonica cultivar-group)] (GB:NP_001063849.1); similar to bzip-related transcription factor -like [Oryza sativa (japonica cultivar-group)] (GB:BAD46467.1); contains InterPro domain Protein of unknown function DUF632; (InterPro:IPR006867); contains InterPro domain Protein of unkn…	3012.43	1482.24
Brapa_ESTC005961	AT1G19850	Symbols: ARF5, IAA24, MP | MP (MONOPTEROS); transcription factor | chr1:6887344-6891173 FORWARD	1153.78	1481.92
Brapa_ESTC044996	AT4G34410	Symbols: | AP2 domain-containing transcription factor, putative | chr4:16451996-16452802 FORWARD	1088.66	1476.71
Brapa_ESTC017076	AT1G61215	Symbols: BRD4 | BRD4 (BROMODOMAIN 4); DNA binding | chr1:22576838-22579039 FORWARD	1398.09	1474.75
Brapa_ESTC024299	AT1G53170	Symbols: ATERF-8, ATERF8 | ATERF-8/ATERF8 (ETHYLENE RESPONSE ELEMENT BINDING FACTOR 4); DNA binding / transcription factor/ transcriptional repressor | chr1:19825207-19825764 REVERSE	1010.1	1474.21
Brapa_ESTC017731	AT1G51745	Symbols: | similar to ATP binding / DNA binding [Arabidopsis thaliana] (TAIR:AT3G21295.1); similar to Os04g0599100 [Oryza sativa (japonica cultivar-group)] (GB:NP_001053748.1); similar to Os01g0558500 [Oryza sativa (japonica cultivar-group)] (GB:NP_001043335.1); similar to serine-rich repeat protein [Streptococcus agalactiae] (GB:AAZ95526.1); contains domain Tudor/PWWP/MBT (SSF63748) | chr1:19195…	636.385	1468.02
Brapa_ESTC021901	AT4G28610	Symbols: ATPHR1, PHR1 | PHR1 (PHOSPHATE STARVATION RESPONSE 1); transcription factor | chr4:14133170-14134957 REVERSE	1644.09	1464.66
Brapa_ESTC008031	AT5G15650	Symbols: REVERSIBLY GLYCOSYLATED POLYPEPTIDE 2, RGP2 | RGP2 (Reversibly glycosylated polypeptide-3); DNA binding / alpha-1,4-glucan-protein synthase (UDP-forming) | chr5:5092206-5094096 FORWARD	2351.99	1464.52
Brapa_ESTC020526	AT3G54620	Symbols: ATBZIP25, BZO2H4 | BZO2H4 (basic leucine zipper O2 homolog 4); transcription factor | chr3:20229063-20231319 REVERSE	6069.28	1462.39
Brapa_ESTC043178	AT3G21430	| Symbols: | DNA binding | chr3:7544806-7552847 REVERSE	2902.89	1461.93
Brapa_ESTC023656	AT2G20400	Symbols: | myb family transcription factor | chr2:8806705-8808702 FORWARD	1774.48	1461.71
Brapa_ESTC000294	AT3G50700	Symbols: ATIDD2 | ATIDD2 (ARABIDOPSIS THALIANA INDETERMINATE(ID)-DOMAIN 2); nucleic acid binding / transcription factor/ zinc ion binding | chr3:18851926-18853810 FORWARD	4443.26	1455.98
Brapa_ESTC010575	AT4G36870	Symbols: BLH2 | BLH2 (BEL1-LIKE HOMEODOMAIN 2); DNA binding | chr4:17369422-17373419 FORWARD	1911.09	1448.78
Brapa_ESTC026960	AT1G76890	Symbols: AT-GT2, GT2 | GT2 (GT2); transcription factor | chr1:28878105-28880097 REVERSE	1293.76	1446.94
Brapa_ESTC024739	AT4G17490	Symbols: ERF-6-6, ATERF6 | ATERF6 (ETHYLENE RESPONSIVE ELEMENT BINDING FACTOR 6); DNA binding / transcription factor | chr4:9752985-9753833 REVERSE	1239.76	1446.23
Brapa_ESTC020616	AT4G25490	Symbols: DREB1B, CBF1 | CBF1 (C-REPEAT/DRE BINDING FACTOR 1); DNA binding / transcription factor/ transcriptional activator | chr4:13021931-13022572 REVERSE	5270.7	1441.58
Brapa_ESTC027382	AT3G02160	Symbols: | similar to unknown protein [Arabidopsis thaliana] (TAIR:AT5G15570.1); similar to hypothetical protein [Cleome spinosa] (GB:ABD96923.1); contains InterPro domain Bromodomain transcription factor; (InterPro:IPR006565); contains InterPro domain Histone-fold; (InterPro:IPR009072) | chr3:394622-395815 FORWARD	900.104	1440.77
Brapa_ESTC030026	AT5G05660	| Symbols: | transcription factor | chr5:1691114-1695465 REVERSE	3557.64	1439.92
Brapa_ESTC009044	AT1G71130	Symbols: | AP2 domain-containing transcription factor, putative | chr1:26826539-26827024 FORWARD	1305.79	1434.36
Brapa_ESTC040358	AT1G68130	Symbols: ATIDD14 | ATIDD14 (ARABIDOPSIS THALIANA INDETERMINATE(ID)-DOMAIN 14); nucleic acid binding / transcription factor/ zinc ion binding | chr1:25536147-25537980 FORWARD	1790.02	1430.88
Brapa_ESTC038045	AT1G07980	Symbols: | histone-like transcription factor (CBF/NF-Y) family protein | chr1:2473520-2474907 REVERSE	877.554	1430.81
Brapa_ESTC031084	AT3G02150	Symbols: TCP13, TFPD, PTF1 | PTF1 (PLASTID transcription factor 1); transcription factor | chr3:391529-392596 FORWARD	1352.75	1429.18
Brapa_ESTC036162	AT1G72830	Symbols: ATHAP2C, HAP2, HAP2C | HAP2C (Heme activator protein (yeast) homolog 2C); transcription factor | chr1:27409361-27410750 REVERSE	1026.02	1428.61
Brapa_ESTC007881	AT3G54340	Symbols: AP3 | AP3 (APETALA 3); DNA binding / transcription factor | chr3:20130406-20132065 REVERSE	869.601	1425.97
Brapa_ESTC011464	AT2G47900	Symbols: AtTLP3 | AtTLP3 (TUBBY LIKE PROTEIN 3); phosphoric diester hydrolase/ transcription factor | chr2:19618266-19619836 REVERSE	6152.63	1422.17
Brapa_ESTC025241	AT1G78280	Symbols: | transcription factor jumonji (jmjC) domain-containing protein | chr1:29457716-29462011 FORWARD	2143.92	1421.85
Brapa_ESTC047769	AT4G16780	Symbols: HAT4, ATHB2, ATHB-2 | ATHB-2 (Homeobox-leucine zipper protein HAT4); DNA binding / transcription factor | chr4:9449310-9450623 FORWARD	3498.95	1420.54
Brapa_ESTC006984	AT3G19290	Symbols: AREB2, ABF4 | ABF4 (ABRE BINDING FACTOR 4); DNA binding / transcription factor/ transcriptional activator | chr3:6687962-6689790 FORWARD	3206.78	1419.23
Brapa_ESTC023302	AT1G53230	Symbols: TCP3 | TCP3 (TCP family transcription factor 3); transcription factor | chr1:19853928-19855103 REVERSE	1499.37	1417.38
Brapa_ESTC000907	AT3G52090	Symbols: ATRPB13.6 | ATRPB13.6 (Arabidopsis thaliana RNA polymerase II 13.6 kDa subunit); DNA binding / DNA-directed RNA polymerase | chr3:19329047-19329976 REVERSE	1574.67	1414.57
Brapa_ESTC038073	AT4G17460	Symbols: HAT1 | HAT1 (homeobox-leucine zipper protein 1); DNA binding / transcription factor | chr4:9739874-9740995 FORWARD	1488.4	1411.64
Brapa_ESTC035091	AT3G57600	Symbols: | AP2 domain-containing transcription factor, putative | chr3:21343818-21344651 FORWARD	455.193	1410.83
Brapa_ESTC000655	AT1G72830	Symbols: ATHAP2C, HAP2, HAP2C | HAP2C (Heme activator protein (yeast) homolog 2C); transcription factor | chr1:27409361-27410750 REVERSE	1003.81	1400.69
Brapa_ESTC013735	AT3G29035	Symbols: ANAC059, ATNAC3 | ANAC059/ATNAC3 (Arabidopsis NAC domain containing protein 59); protein heterodimerization/ transcription factor | chr3:11035076-11036243 FORWARD	1726	1400.29
Brapa_ESTC033950	AT5G04340	Symbols: C2H2 | C2H2; nucleic acid binding / transcription factor/ zinc ion binding | chr5:1216322-1217038 REVERSE	4050.43	1399.55
Brapa_ESTC037364	AT4G12020	Symbols: ATWRKY19, WRKY19, MAPKKK11 | WRKY19 (WRKY DNA-binding protein 19); transcription factor | chr4:7201650-7208590 FORWARD	411.555	1394.27
Brapa_ESTC026594	AT3G54620	Symbols: ATBZIP25, BZO2H4 | BZO2H4 (basic leucine zipper O2 homolog 4); transcription factor | chr3:20229063-20231319 REVERSE	7883.47	1393.77
Brapa_ESTC020978	AT5G61420	Symbols: AtMYB28, MYB28 | MYB28 (myb domain protein 28); DNA binding / transcription factor | chr5:24706701-24708021 REVERSE	1890.34	1393.53
Brapa_ESTC034534	AT5G21960	Symbols: | AP2 domain-containing transcription factor, putative | chr5:7258563-7259213 REVERSE	1148.67	1392.78
Brapa_ESTC013516	AT1G43700	Symbols: VIP1 | VIP1 (VIRE2-INTERACTING PROTEIN 1); transcription factor | chr1:16486792-16488457 FORWARD	4828.81	1390.76
Brapa_ESTC041185	AT2G21230	Symbols: | bZIP family transcription factor | chr2:9101001-9103140 REVERSE	1642.03	1387.59
Brapa_ESTC010422	AT1G07370	Symbols: PCNA1 | PCNA1 (PROLIFERATING CELLULAR NUCLEAR ANTIGEN); DNA binding / DNA polymerase processivity factor | chr1:2263202-2264380 FORWARD	1492.39	1387.19
Brapa_ESTC045592	AT5G13790	Symbols: AGL15 | AGL15 (AGAMOUS-LIKE 15); DNA binding / transcription factor | chr5:4449131-4450805 REVERSE	1163.69	1387.1
Brapa_ESTC009966	AT5G42780	Symbols: ATHB27 | ATHB27 (ARABIDOPSIS THALIANA HOMEOBOX PROTEIN 27); DNA binding / transcription factor | chr5:17172069-17172797 FORWARD	1214.77	1386.28
Brapa_ESTC017118	AT3G01140	Symbols: AtMYB106, MYB106 | MYB106 (myb domain protein 106); DNA binding / transcription factor | chr3:46626-48150 REVERSE	874.283	1383.5
Brapa_ESTC020360	AT1G08970	Symbols: HAP5C | HAP5C (HEME ACTIVATED PROTEIN 5C); DNA binding / transcription factor | chr1:2883147-2883842 FORWARD	3423.79	1377.96
Brapa_ESTC049716	AT5G62470	Symbols: mybcov1, AtMYB96, MYB96 | MYB96 (myb domain protein 96); DNA binding / transcription factor | chr5:25096660-25098084 REVERSE	2002.43	1374.75
Brapa_ESTC005563	AT5G20730	Symbols: MSG1, IAA21, ARF7, TIR5, BIP, IAA23, IAA25, NPH4 | NPH4 (NON-PHOTOTROPHIC HYPOCOTYL); transcription factor | chr5:7016706-7021506 REVERSE	2069.69	1373.46
Brapa_ESTC042445	AT4G00050	Symbols: UNE10 | UNE10 (unfertilized embryo sac 10); DNA binding / transcription factor | chr4:17863-19848 FORWARD	1627.4	1370.92
Brapa_ESTC021781	AT5G61590	Symbols: | AP2 domain-containing transcription factor family protein | chr5:24781879-24782484 REVERSE	2123.83	1369.46
Brapa_ESTC037792	AT3G28920	Symbols: ATHB34 | ATHB34 (ARABIDOPSIS THALIANA HOMEOBOX PROTEIN 34); DNA binding / transcription factor | chr3:10941835-10942773 REVERSE	4316.57	1369.19
Brapa_ESTC022904	AT1G68840	Symbols: RAP2.8, RAV2 | RAV2 (REGULATOR OF THE ATPASE OF THE VACUOLAR MEMBRANE); DNA binding / transcription factor | chr1:25884105-25885163 FORWARD	1613.65	1364.9
Brapa_ESTC030897	AT2G01570	Symbols: RGA, RGA1 | RGA1 (REPRESSOR OF GA1-3 1); transcription factor | chr2:255580-257343 REVERSE	2434.28	1361.35
Brapa_ESTC041819	AT2G38090	Symbols: | myb family transcription factor | chr2:15952356-15953853 FORWARD	4610.86	1355.42
Brapa_ESTC042043	AT2G38470	Symbols: ATWRKY33, WRKY33 | WRKY33 (WRKY DNA-binding protein 33); transcription factor | chr2:16115554-16117617 FORWARD	776.068	1354.23
Brapa_ESTC022754	AT4G20010	Symbols: PTAC9, OSB2 | PTAC9 (PLASTID TRANSCRIPTIONALLY ACTIVE9); single-stranded DNA binding | chr4:10842138-10843999 FORWARD	2197.78	1349.93
Brapa_ESTC021269	AT5G62020	Symbols: HSFB2A, AT-HSFB2A | AT-HSFB2A (Arabidopsis thaliana heat shock transcription factor B2A); DNA binding / transcription factor | chr5:24933438-24934420 FORWARD	3245.8	1347.58
Brapa_ESTC029442	AT1G48560	Symbols: | similar to PWWP domain-containing protein [Arabidopsis thaliana] (TAIR:AT5G27650.1); contains InterPro domain Eukaryotic transcription factor, DNA-binding; (InterPro:IPR008917) | chr1:17956603-17958776 FORWARD	1125.74	1346.42
Brapa_ESTC043135	AT3G18035	| Symbols: HON4 | HON4; DNA binding | chr3:6169390-6171564 REVERSE	1039.65	1345.67
Brapa_ESTC041635	AT2G33610	Symbols: CHB2, ATSWI3B | ATSWI3B (Arabidopsis thaliana switching protein 3B); DNA binding | chr2:14236099-14238225 FORWARD	2078.38	1341.93
Brapa_ESTC018113	AT1G74430	Symbols: AtMYB95, AtMYBCP66, MYB95 | MYB95 (myb domain protein 95); DNA binding / transcription factor | chr1:27979070-27980779 FORWARD	691.321	1336.46
Brapa_ESTC021198	AT3G57390	Symbols: AGL18 | AGL18 (AGAMOUS-LIKE 18); transcription factor | chr3:21244887-21246712 FORWARD	588.73	1331.25
Brapa_ESTC021131	AT3G50410	Symbols: OBP1 | OBP1 (OBF BINDING PROTEIN 1); DNA binding / transcription factor | chr3:18720853-18721614 FORWARD	1564.35	1330.09
Brapa_ESTC041391	AT2G31450	Symbols: | DNA binding / endonuclease/ iron ion binding | chr2:13408395-13411211 REVERSE	1054.45	1330.01
Brapa_ESTC012272	AT3G07740	Symbols: ATADA2A, HAC10, HXA02, HXA2, ADA2A | ADA2A (Arabidopsis adaptor 2A homolog); DNA binding / transcription factor | chr3:2470020-2473068 REVERSE	3555.9	1329.57
Brapa_ESTC049662	AT5G64530	Symbols: ANAC104, XND1 | ANAC104/XND1 (Arabidopsis NAC domain containing protein 104); transcription factor | chr5:25812586-25813925 FORWARD	929.439	1328.95
Brapa_ESTC006928	AT1G03190	Symbols: ATXPD, UVH6 | UVH6 (ULTRAVIOLET HYPERSENSITIVE 6); ATP binding / ATP-dependent DNA helicase/ ATP-dependent helicase/ DNA binding / hydrolase, acting on acid anhydrides, in phosphorus-containing anhydrides / nucleic acid binding | chr1:775822-779863 FORWARD	1911.96	1320.41
Brapa_ESTC021284	AT5G67190	Symbols: | AP2 domain-containing transcription factor, putative | chr5:26826361-26826915 REVERSE	2621.6	1316.3
Brapa_ESTC015955	AT3G18524	Symbols: ATMSH2, MSH2 | MSH2 (MUTS HOMOLOG 2); ATP binding / damaged DNA binding | chr3:6368157-6372415 REVERSE	1046.18	1309.61
Brapa_ESTC022110	AT2G38695	| Symbols: | transcription factor | chr2:16185024-16187314 FORWARD	3821.66	1308.23
Brapa_ESTC017309	AT5G04290	Symbols: | KOW domain-containing transcription factor family protein | chr5:1196070-1202654 FORWARD	927.526	1307.01
Brapa_ESTC024366	AT2G01060	Symbols: | myb family transcription factor | chr2:73456-74902 REVERSE	2570.28	1306.27
Brapa_ESTC004462	AT5G25890	Symbols: IAR2, IAA28 | IAA28 (IAA-ALANINE RESISTANT 2); transcription factor | chr5:9033483-9034557 FORWARD	1677.46	1305.86
Brapa_ESTC032833	AT5G01380	| Symbols: | transcription factor | chr5:155783-157450 REVERSE	3549.93	1305.19
Brapa_ESTC011647	AT2G40340	Symbols: | AP2 domain-containing transcription factor, putative (DRE2B) | chr2:16855743-16857435 REVERSE	9460.24	1304.69
Brapa_ESTC013595	AT1G28420	Symbols: HB-1 | HB-1 (homeobox-1); transcription factor | chr1:9979928-9987446 FORWARD	826.199	1304.56
Brapa_ESTC027988	AT5G41410	Symbols: BEL1 | BEL1 (BELL 1); DNA binding / transcription factor | chr5:16597652-16600998 FORWARD	1396.39	1302.32
Brapa_ESTC044977	AT4G34590	Symbols: ATBZIP11, ATB2, BZIP11, GBF6 | GBF6 (G-box binding factor 6); DNA binding / transcription factor | chr4:16522454-16522933 FORWARD	1201.61	1302.13
Brapa_ESTC018804	AT1G19220	Symbols: IAA22, ARF11, ARF19 | ARF19 (AUXIN RESPONSE FACTOR 11); transcription factor | chr1:6628386-6632770 REVERSE	1775.79	1300.02
Brapa_ESTC043569	AT3G52170	| Symbols: | DNA binding | chr3:19358017-19360077 REVERSE	1049.79	1298.56
Brapa_ESTC015862	AT1G64380	Symbols: | AP2 domain-containing transcription factor, putative | chr1:23894644-23895651 REVERSE	4629.12	1296.04
Brapa_ESTC046543	AT5G64340	Symbols: SAC51 | SAC51 (SUPPRESSOR OF ACAULIS 51); transcription factor/ transcription regulator | chr5:25748116-25749162 REVERSE	1814.42	1294.97
Brapa_ESTC044087	AT4G16750	Symbols: | DRE-binding transcription factor, putative | chr4:9421143-9421682 REVERSE	1433.05	1294.29
Brapa_ESTC034445	AT1G63100	Symbols: | scarecrow transcription factor family protein | chr1:23403056-23405032 REVERSE	1372.42	1291.64
Brapa_ESTC001725	AT5G15650	Symbols: REVERSIBLY GLYCOSYLATED POLYPEPTIDE 2, RGP2 | RGP2 (Reversibly glycosylated polypeptide-3); DNA binding / alpha-1,4-glucan-protein synthase (UDP-forming) | chr5:5092206-5094096 FORWARD	2606.01	1290.48
Brapa_ESTC003239	AT2G23320	Symbols: WRKY15 | WRKY15 (WRKY DNA-binding protein 15); transcription factor | chr2:9932078-9933234 FORWARD	1058.21	1287.12
Brapa_ESTC004972	AT3G01970	Symbols: ATWRKY45, WRKY45 | WRKY45 (WRKY DNA-binding protein 45); transcription factor | chr3:326621-327166 REVERSE	652.469	1285.85
Brapa_ESTC034160	AT4G36920	Symbols: FLO2, FL1, AP2 | AP2 (APETALA 2); transcription factor | chr4:17400995-17403137 FORWARD	1094.13	1285.4
Brapa_ESTC018348	AT1G21700	Symbols: CHB4, ATSWI3C | ATSWI3C (Arabidopsis thaliana switching protein 3C); DNA binding | chr1:7620145-7623967 REVERSE	1646.43	1276.66
Brapa_ESTC040985	AT2G17950	Symbols: PGA6, WUS | WUS (WUSCHEL); DNA binding / transcription factor | chr2:7816182-7817753 REVERSE	784.27	1274.21
Brapa_ESTC022936	AT1G74840	Symbols: | myb family transcription factor | chr1:28119862-28120978 REVERSE	1593.58	1273.51
Brapa_ESTC041151	AT3G01460	Symbols: MBD9 | MBD9 (METHYL-CPG-BINDING DOMAIN 9); DNA binding | chr3:173323-182045 FORWARD	1711.05	1270.14
Brapa_ESTC048309	AT1G19000	Symbols: | myb family transcription factor | chr1:6561326-6562675 REVERSE	1879.52	1269.63
Brapa_ESTC006976	AT2G47210	Symbols: | myb family transcription factor | chr2:19386109-19389274 FORWARD	1337.92	1268.37
Brapa_ESTC018981	AT1G22640	Symbols: AtMYB3, MYB3 | MYB3 (myb domain protein 3); DNA binding / transcription factor | chr1:8006278-8007208 FORWARD	1316.1	1267.35
Brapa_ESTC044580	AT4G28140	Symbols: | AP2 domain-containing transcription factor, putative | chr4:13974911-13975789 REVERSE	1754.22	1261.33
Brapa_ESTC047240	AT1G56010	Symbols: ANAC021, ANAC022, NAC1 | NAC1 (Arabidopsis NAC domain containing protein 21, Arabidopsis NAC domain containing protein 22); transcription factor | chr1:20950517-20952809 REVERSE	2676.52	1261.31
Brapa_ESTC022419	AT1G77080	Symbols: FLM, AGL27, MAF1 | MAF1 (MADS AFFECTING FLOWERING 1); transcription factor | chr1:28960573-28964739 FORWARD	1055.24	1260.92
Brapa_ESTC017766	AT3G22220	Symbols: | DNA binding / protein dimerization | chr3:7839815-7842365 REVERSE	1926.8	1257.92
Brapa_ESTC006705	AT3G17100	| Symbols: | transcription factor | chr3:5831558-5832250 FORWARD	1174.41	1255.3
Brapa_ESTC023421	AT2G34710	Symbols: ATHB14, ATHB-14, PHB-1D, PHB | PHB (PHABULOSA); DNA binding / transcription factor | chr2:14646627-14651072 REVERSE	1354.08	1254.09
Brapa_ESTC025754	AT3G25730	Symbols: | AP2 domain-containing transcription factor, putative | chr3:9397742-9398743 FORWARD	3667.74	1250.57
Brapa_ESTC024758	AT5G65790	Symbols: AtMYB68, MYB68 | MYB68 (myb domain protein 68); DNA binding / transcription factor | chr5:26340261-26341611 FORWARD	795.391	1249.87
Brapa_ESTC035196	AT4G30410	| Symbols: | transcription factor | chr4:14871315-14871857 REVERSE	480.466	1247.65
Brapa_ESTC024162	AT4G32730	Symbols: PC-MYB1, ATMYB3R1, MYB3R-1, ATMYB3R-1 | PC-MYB1 (myb domain protein 3R1); DNA binding / transcription factor | chr4:15791044-15795648 FORWARD	887.028	1247.14
Brapa_ESTC024213	AT4G37730	Symbols: ATBZIP7 | bZIP transcription factor family protein | chr4:17723794-17724711 FORWARD	1416.4	1243.47
Brapa_ESTC009091	AT3G11280	Symbols: | myb family transcription factor | chr3:3533483-3534399 REVERSE	2040.58	1237.35
Brapa_ESTC044928	AT4G32730	Symbols: PC-MYB1, ATMYB3R1, MYB3R-1, ATMYB3R-1 | PC-MYB1 (myb domain protein 3R1); DNA binding / transcription factor | chr4:15791044-15795648 FORWARD	1345.02	1236.29
Brapa_ESTC036597	AT4G30080	Symbols: ARF16 | ARF16 (AUXIN RESPONSE FACTOR 16); miRNA binding / transcription factor | chr4:14703375-14705570 REVERSE	1806.85	1235.47
Brapa_ESTC018261	AT3G10800	Symbols: | bZIP transcription factor family protein | chr3:3379331-3381435 FORWARD	3478.69	1234.73
Brapa_ESTC037415	AT1G67500	Symbols: ATREV3 | ATREV3 (Arabidopsis thaliana recovery protein 3); DNA binding | chr1:25291370-25300377 REVERSE	1566.87	1230.95
Brapa_ESTC041031	AT2G17950	Symbols: PGA6, WUS | WUS (WUSCHEL); DNA binding / transcription factor | chr2:7816182-7817753 REVERSE	649.174	1230.74
Brapa_ESTC022435	AT3G15030	Symbols: MEE35, TCP4 | TCP4 (TCP family transcription factor 4, maternal effect embryo arrest 35); transcription factor | chr3:5062315-5063577 FORWARD	1900.21	1225.75
Brapa_ESTC031152	AT3G15170	Symbols: ANAC054, ATNAC1, CUC1 | CUC1 (CUP-SHAPED COTYLEDON1); transcription factor | chr3:5109919-5111442 FORWARD	926.739	1224.2
Brapa_ESTC021745	AT5G25810	Symbols: TNY | TNY (TINY); DNA binding / transcription factor | chr5:8986979-8987635 REVERSE	701.832	1220.15
Brapa_ESTC021801	AT4G32880	Symbols: ATHB8, ATHB-8 | ATHB-8 (HOMEOBOX GENE 8); DNA binding / transcription factor | chr4:15863591-15867826 REVERSE	1374.34	1219.75
Brapa_ESTC013788	AT1G67590	| Symbols: | DNA binding | chr1:25336918-25338135 REVERSE	964.576	1217.81
Brapa_ESTC010952	AT1G53320	Symbols: AtTLP7 | AtTLP7 (TUBBY LIKE PROTEIN 7); phosphoric diester hydrolase/ transcription factor | chr1:19894905-19897097 REVERSE	3127.79	1217.28
Brapa_ESTC020337	AT4G01500	Symbols: NGA4 | NGA4 (NGATHA4); transcription factor | chr4:639806-640792 FORWARD	1044.27	1216.8
Brapa_ESTC039575	AT1G13300	Symbols: | myb family transcription factor | chr1:4556974-4558588 FORWARD	1081.2	1215.53
Brapa_ESTC042493	AT3G02990	Symbols: HSFA1E, ATHSFA1E | ATHSFA1E (Arabidopsis thaliana heat shock transcription factor A1E); DNA binding / transcription factor | chr3:673621-675995 FORWARD	2025.3	1215.13
Brapa_ESTC019053	AT1G28370	Symbols: ERF11, ATERF11 | ATERF11/ERF11 (ERF domain protein 11); DNA binding / transcription factor/ transcriptional repressor | chr1:9956337-9956837 REVERSE	1282.01	1213.32
Brapa_ESTC027004	AT1G32750	Symbols: HAF1, HAC13, GTD1, HAF01 | HAF01 (Histone acetyltransferase TAFII250 family); DNA binding | chr1:11846365-11856241 REVERSE	840.88	1210.19
Brapa_ESTC030987	AT4G12020	Symbols: ATWRKY19, WRKY19, MAPKKK11 | WRKY19 (WRKY DNA-binding protein 19); transcription factor | chr4:7201650-7208590 FORWARD	632.057	1209.06
Brapa_ESTC020511	AT1G60350	Symbols: ANAC024 | ANAC024 (Arabidopsis NAC domain containing protein 24); transcription factor | chr1:22244938-22245900 REVERSE	531.441	1208.03
Brapa_ESTC011681	AT1G77450	Symbols: ANAC032 | ANAC032 (Arabidopsis NAC domain containing protein 32); transcription factor | chr1:29104923-29105875 FORWARD	2224.43	1199.62
Brapa_ESTC021586	AT3G52170	| Symbols: | DNA binding | chr3:19358017-19360077 REVERSE	1178.22	1198.5
Brapa_ESTC012095	AT5G58900	Symbols: | myb family transcription factor | chr5:23800501-23801893 REVERSE	1666.31	1196.39
Brapa_ESTC017090	AT4G18170	Symbols: ATWRKY28, WRKY28 | WRKY28 (WRKY DNA-binding protein 28); transcription factor | chr4:10061519-10062702 FORWARD	1749.07	1196.04
Brapa_ESTC026714	AT4G32880	Symbols: ATHB8, ATHB-8 | ATHB-8 (HOMEOBOX GENE 8); DNA binding / transcription factor | chr4:15863591-15867826 REVERSE	1308.25	1194.98
Brapa_ESTC009888	AT3G19580	Symbols: AZF2 | AZF2 (ARABIDOPSIS ZINC-FINGER PROTEIN 2); nucleic acid binding / transcription factor/ zinc ion binding | chr3:6803299-6804120 REVERSE	3717.55	1193.53
Brapa_ESTC021222	AT3G57390	Symbols: AGL18 | AGL18 (AGAMOUS-LIKE 18); transcription factor | chr3:21244887-21246712 FORWARD	869.914	1192.57
Brapa_ESTC015061	AT5G63330	| Symbols: | DNA binding | chr5:25394406-25396009 REVERSE	3015.64	1191.17
Brapa_ESTC025999	AT3G50890	Symbols: ATHB28 | ATHB28 (ARABIDOPSIS THALIANA HOMEOBOX PROTEIN 28); DNA binding / transcription factor | chr3:18927401-18928150 FORWARD	463.746	1189.01
Brapa_ESTC050961	AT3G01970	Symbols: ATWRKY45, WRKY45 | WRKY45 (WRKY DNA-binding protein 45); transcription factor | chr3:326621-327166 REVERSE	939.062	1188.3
Brapa_ESTC011349	AT3G45880	Symbols: | similar to transcription factor jumonji (jmjC) domain-containing protein [Arabidopsis thaliana] (TAIR:AT5G19840.1); similar to transcription factor jumonji, jmjC [Medicago truncatula] (GB:ABE92082.1); contains InterPro domain transcription factor jumonji/aspartyl beta-hydroxylase; (InterPro:IPR003347) | chr3:16880840-16882529 REVERSE	2195.08	1187.09
Brapa_ESTC033595	AT2G44745	Symbols: | WRKY family transcription factor | chr2:18454557-18456079 REVERSE	858.094	1185.17
Brapa_ESTC021765	AT5G25890	Symbols: IAR2, IAA28 | IAA28 (IAA-ALANINE RESISTANT 2); transcription factor | chr5:9033483-9034557 FORWARD	710.688	1181.11
Brapa_ESTC046862	AT5G52600	Symbols: AtMYB82 | AtMYB82 (myb domain protein 82); DNA binding / transcription factor | chr5:21360423-21361194 REVERSE	774.261	1180.04
Brapa_ESTC037685	AT1G08970	Symbols: HAP5C | HAP5C (HEME ACTIVATED PROTEIN 5C); DNA binding / transcription factor | chr1:2883147-2883842 FORWARD	2076.42	1179.86
Brapa_ESTC044992	AT4G34430	Symbols: ATSWI3D, CHB3 | CHB3 (Arabidopsis thaliana switch 3D); DNA binding / transcription factor | chr4:16461073-16464997 FORWARD	2032.71	1175.32
Brapa_ESTC025517	AT5G29000	Symbols: | myb family transcription factor | chr5:11022340-11024104 REVERSE	1332.83	1175.21
Brapa_ESTC020288	AT5G27610	Symbols: | DNA binding / transcription factor | chr5:9764855-9769709 FORWARD	2431.64	1174.82
Brapa_ESTC006047	AT5G16600	Symbols: AtMYB43, MYB43 | MYB43 (myb domain protein 43); DNA binding / transcription factor | chr5:5438294-5440217 FORWARD	581.269	1172.46
Brapa_ESTC011099	AT1G32130	Symbols: | similar to IWS1 C-terminus family protein [Arabidopsis thaliana] (TAIR:AT4G19000.1); similar to Os01g0147200 [Oryza sativa (japonica cultivar-group)] (GB:NP_001042011.1); similar to unnamed protein product [Ostreococcus tauri] (GB:CAL53710.1); contains InterPro domain IWS1, C-terminal; (InterPro:IPR008654); contains InterPro domain transcription factors TFIIS, elongin A, CRSP70, conser…	2001.55	1168.33
Brapa_ESTC006124	AT5G64810	Symbols: WRKY51 | WRKY51 (WRKY DNA-binding protein 51); transcription factor | chr5:25925641-25926913 FORWARD	312.403	1165.5
Brapa_ESTC018875	AT1G19220	Symbols: IAA22, ARF11, ARF19 | ARF19 (AUXIN RESPONSE FACTOR 11); transcription factor | chr1:6628386-6632770 REVERSE	1747.29	1164.73
Brapa_ESTC003253	AT3G01470	Symbols: ATHB1, HD-ZIP-1, HAT5, ATHB-1 | ATHB-1 (Homeobox-leucine zipper protein HAT5); transcription factor | chr3:182655-184041 REVERSE	4356.74	1161.07
Brapa_ESTC016751	AT2G16400	Symbols: BLH7 | BLH7 (BELL1-LIKE HOMEODOMAIN 7); DNA binding / transcription factor | chr2:7108572-7110282 REVERSE	2004.82	1160.47
Brapa_ESTC020973	AT1G19850	Symbols: ARF5, IAA24, MP | MP (MONOPTEROS); transcription factor | chr1:6887344-6891173 FORWARD	899.679	1159.42
Brapa_ESTC043577	AT3G52280	Symbols: GTE6 | GTE6 (GENERAL transcription factor GROUP E6); DNA binding | chr3:19400081-19402267 REVERSE	949.063	1156.57
Brapa_ESTC012231	AT5G48150	Symbols: PAT1 | PAT1 (PHYTOCHROME A SIGNAL TRANSDUCTION 1); transcription factor | chr5:19539723-19541279 REVERSE	2078.94	1156.37
Brapa_ESTC043154	AT3G18524	Symbols: ATMSH2, MSH2 | MSH2 (MUTS HOMOLOG 2); ATP binding / damaged DNA binding | chr3:6368157-6372415 REVERSE	728.85	1152.55
Brapa_ESTC025927	AT3G17609	Symbols: HYH | HYH (HY5-HOMOLOG); DNA binding / transcription factor | chr3:6023977-6024591 FORWARD	391.824	1152.43
Brapa_ESTC013976	AT4G34680	Symbols: | GATA transcription factor 3, putative (GATA-3) | chr4:16553705-16554615 FORWARD	563.803	1148.83
Brapa_ESTC032580	AT1G30490	Symbols: ATHB9 | PHV (PHAVOLUTA); DNA binding / transcription factor | chr1:10796310-10800726 REVERSE	1511.71	1135.57
Brapa_ESTC033450	AT1G71520	Symbols: | AP2 domain-containing transcription factor, putative | chr1:26942274-26942705 FORWARD	1067.58	1131.81
Brapa_ESTC020002	AT4G36870	Symbols: BLH2 | BLH2 (BEL1-LIKE HOMEODOMAIN 2); DNA binding | chr4:17369422-17373419 FORWARD	1988.66	1131.81
Brapa_ESTC040734	AT1G79180	Symbols: AtMYB63 | AtMYB63 (myb domain protein 63); DNA binding / transcription factor | chr1:29791402-29792482 FORWARD	511.696	1129.78
Brapa_ESTC012472	AT4G27950	Symbols: CRF4 | CRF4 (CYTOKININ RESPONSE FACTOR 4); DNA binding / transcription factor | chr4:13909738-13910745 REVERSE	967.834	1125.37
Brapa_ESTC030306	AT2G02080	Symbols: ATIDD4 | ATIDD4 (ARABIDOPSIS THALIANA INDETERMINATE(ID)-DOMAIN 4); transcription factor | chr2:518327-521169 REVERSE	1587.45	1123.92
Brapa_ESTC051119	AT3G13040	Symbols: | myb family transcription factor | chr3:4172422-4174463 REVERSE	528.489	1123.79
Brapa_ESTC035529	AT3G55370	Symbols: OBP3 | OBP3 (OBF-BINDING PROTEIN 3); DNA binding | chr3:20538175-20539853 FORWARD	1859.6	1118.83
Brapa_ESTC034036	AT5G22290	Symbols: ANAC089 | ANAC089 (Arabidopsis NAC domain containing protein 89); transcription factor | chr5:7376047-7377501 REVERSE	587.52	1117.9
Brapa_ESTC029994	AT5G25160	Symbols: ZFP3 | ZFP3 (ZINC FINGER PROTEIN 3); nucleic acid binding / transcription factor/ zinc ion binding | chr5:8687527-8688234 FORWARD	1287.35	1116.14
Brapa_ESTC016691	AT4G32605	| Symbols: | transcription factor | chr4:15726435-15727870 REVERSE	1813.36	1110.25
Brapa_ESTC004610	AT2G20570	Symbols: GLK1, GPRI1 | GPRI1 (GOLDEN2-LIKE 1); transcription factor | chr2:8862567-8864603 FORWARD	1253.58	1104.7
Brapa_ESTC044827	AT4G32605	| Symbols: | transcription factor | chr4:15726435-15727870 REVERSE	1674.52	1104.25
Brapa_ESTC043735	AT1G08680	Symbols: AGD14, ZIGA4 | ZIGA4 (ARF GAP-LIKE ZINC FINGER-CONTAINING PROTEIN ZIGA4); DNA binding | chr1:2762823-2768390 FORWARD	1746.62	1104.19
Brapa_ESTC011220	AT1G01720	Symbols: ANAC002, ATAF1 | ATAF1 (Arabidopsis NAC domain containing protein 2); transcription factor | chr1:268471-269514 FORWARD	1949.41	1103.8
Brapa_ESTC038077	AT5G47390	Symbols: | myb family transcription factor | chr5:19244228-19245773 FORWARD	2980.69	1103.67
Brapa_ESTC026203	AT1G25550	Symbols: | myb family transcription factor | chr1:8976631-8977929 FORWARD	782.966	1099.36
Brapa_ESTC011257	AT4G34680	Symbols: | GATA transcription factor 3, putative (GATA-3) | chr4:16553705-16554615 FORWARD	370.733	1095.15
Brapa_ESTC000752	AT2G25180	Symbols: ARR12 | ARR12 (ARABIDOPSIS RESPONSE REGULATOR 12); transcription factor/ two-component response regulator | chr2:10731569-10734040 REVERSE	2484.83	1092.97
Brapa_ESTC024650	AT5G01900	Symbols: ATWRKY62, WRKY62 | WRKY62 (WRKY DNA-binding protein 62); transcription factor | chr5:351133-352010 REVERSE	988.42	1090.06
Brapa_ESTC029879	AT3G26744	Symbols: ICE1 | ICE1 (INDUCER OF CBF EXPRESSION 1); DNA binding | chr3:9834190-9836027 REVERSE	762.174	1089.89
Brapa_ESTC018959	AT5G18830	Symbols: SPL7 | SPL7 (SQUAMOSA PROMOTER BINDING PROTEIN-LIKE 7); DNA binding / transcription factor | chr5:6276118-6280229 FORWARD	4677.23	1085.94
Brapa_ESTC023854	AT3G01460	Symbols: MBD9 | MBD9 (METHYL-CPG-BINDING DOMAIN 9); DNA binding | chr3:173323-182045 FORWARD	1180.22	1084.12
Brapa_ESTC010421	AT2G20825	Symbols: ULT2 | ULT2 (ULTRAPETALA 2); DNA binding | chr2:8972926-8973876 REVERSE	1225.92	1083.21
Brapa_ESTC016185	AT3G53440	| Symbols: | DNA binding | chr3:19821914-19823452 FORWARD	1879.43	1079.95
Brapa_ESTC041086	AT2G20570	Symbols: GLK1, GPRI1 | GPRI1 (GOLDEN2-LIKE 1); transcription factor | chr2:8862567-8864603 FORWARD	1059.27	1079.49
Brapa_ESTC011816	AT3G51960	Symbols: | bZIP family transcription factor | chr3:19293806-19295042 REVERSE	309.151	1079.03
Brapa_ESTC051857	AT1G69690	Symbols: | TCP family transcription factor, putative | chr1:26220112-26221089 FORWARD	671.335	1077.72
Brapa_ESTC016178	AT2G37550	Symbols: AGD7, ASP1 | ASP1 (PDE1 SUPPRESSOR 1); DNA binding | chr2:15762622-15764534 REVERSE	1199.05	1076.61
Brapa_ESTC006796	AT4G25490	Symbols: DREB1B, CBF1 | CBF1 (C-REPEAT/DRE BINDING FACTOR 1); DNA binding / transcription factor/ transcriptional activator | chr4:13021931-13022572 REVERSE	2826.83	1074.39
Brapa_ESTC016197	AT4G24240	Symbols: ATWRKY7, WRKY7 | WRKY7 (WRKY DNA-binding protein 7); transcription factor | chr4:12571940-12573456 FORWARD	2599.5	1072.56
Brapa_ESTC042117	AT2G46410	Symbols: CPC | CPC (CAPRICE); DNA binding / transcription factor | chr2:19056388-19057258 REVERSE	1730.08	1072.3
Brapa_ESTC008186	AT3G01140	Symbols: AtMYB106, MYB106 | MYB106 (myb domain protein 106); DNA binding / transcription factor | chr3:46626-48150 REVERSE	546.672	1068.03
Brapa_ESTC038351	AT4G13980	Symbols: HSFA5, AT-HSFA5 | AT-HSFA5 (Arabidopsis thaliana heat shock transcription factor A5); DNA binding / transcription factor | chr4:8077514-8079242 REVERSE	951.738	1066.55
Brapa_ESTC004003	AT2G33810	Symbols: SPL3 | SPL3 (SQUAMOSA PROMOTER BINDING PROTEIN-LIKE 3); transcription factor | chr2:14312418-14312904 FORWARD	998.582	1060.11
Brapa_ESTC045322	AT5G04410	Symbols: ANAC078, NAC2 | NAC2 (Arabidopsis NAC domain containing protein 78); transcription factor | chr5:1243981-1246417 FORWARD	1863.49	1054.84
Brapa_ESTC007288	AT3G18550	Symbols: BRC1, TCP12 | TCP family transcription factor, putative | chr3:6383775-6385276 FORWARD	1243.35	1054.07
Brapa_ESTC004457	AT4G17490	Symbols: ERF-6-6, ATERF6 | ATERF6 (ETHYLENE RESPONSIVE ELEMENT BINDING FACTOR 6); DNA binding / transcription factor | chr4:9752985-9753833 REVERSE	723.415	1053.6
Brapa_ESTC051181	AT5G08520	Symbols: | myb family transcription factor | chr5:2755471-2757742 REVERSE	2208.09	1053.11
Brapa_ESTC043379	AT3G27260	Symbols: GTE8 | GTE8 (GLOBAL transcription factor GROUP E8); DNA binding | chr3:10069648-10073640 FORWARD	2654.51	1050.78
Brapa_ESTC031083	AT3G02160	Symbols: | similar to unknown protein [Arabidopsis thaliana] (TAIR:AT5G15570.1); similar to hypothetical protein [Cleome spinosa] (GB:ABD96923.1); contains InterPro domain Bromodomain transcription factor; (InterPro:IPR006565); contains InterPro domain Histone-fold; (InterPro:IPR009072) | chr3:394622-395815 FORWARD	1322.6	1049.53
Brapa_ESTC026367	AT4G18880	Symbols: HSFA4A, AT-HSFA4A | AT-HSFA4A (Arabidopsis thaliana heat shock transcription factor A4A); DNA binding / transcription factor | chr4:10347780-10349062 REVERSE	1144.25	1049.1
Brapa_ESTC035554	AT4G04635	Symbols: | DNA binding / transposase | chr4:2347901-2349154 FORWARD	1087.06	1048.4
Brapa_ESTC045870	AT5G20730	Symbols: MSG1, IAA21, ARF7, TIR5, BIP, IAA23, IAA25, NPH4 | NPH4 (NON-PHOTOTROPHIC HYPOCOTYL); transcription factor | chr5:7016706-7021506 REVERSE	1663.65	1048.21
Brapa_ESTC033527	AT3G01140	Symbols: AtMYB106, MYB106 | MYB106 (myb domain protein 106); DNA binding / transcription factor | chr3:46626-48150 REVERSE	699.435	1048.17
Brapa_ESTC032232	AT5G60690	Symbols: IFL, IFL1, REV | REV (REVOLUTA); DNA binding / lipid binding / transcription factor | chr5:24414960-24419159 FORWARD	1045.81	1042.32
Brapa_ESTC021688	AT5G17800	Symbols: AtMYB56 | AtMYB56 (myb domain protein 56); DNA binding / transcription factor | chr5:5877249-5879073 FORWARD	757.487	1040.62
Brapa_ESTC042446	AT4G00120	Symbols: IND, EDA33 | EDA33/IND (INDEHISCENT, embryo sac development arrest 33); DNA binding / transcription factor | chr4:42601-43197 REVERSE	1373.63	1038.58
Brapa_ESTC019693	AT5G62260	| Symbols: | DNA binding | chr5:25026557-25028574 FORWARD	904.62	1037.52
Brapa_ESTC006198	AT5G04760	Symbols: | myb family transcription factor | chr5:1373753-1374530 REVERSE	1702.3	1035.84
Brapa_ESTC005678	AT1G76580	| Symbols: | transcription factor | chr1:28740222-28743345 FORWARD	1221.34	1031
Brapa_ESTC009092	AT3G12560	Symbols: ATTBP2, TRFL9 | TRFL9 (TRF-LIKE 9); DNA binding | chr3:3982279-3984855 REVERSE	691.998	1025.92
Brapa_ESTC018552	AT1G05380	| Symbols: | DNA binding | chr1:1577230-1582189 FORWARD	2031.66	1025.08
Brapa_ESTC030153	AT1G79180	Symbols: AtMYB63 | AtMYB63 (myb domain protein 63); DNA binding / transcription factor | chr1:29791402-29792482 FORWARD	470.144	1023.06
Brapa_ESTC014402	AT2G40750	Symbols: ATWRKY54, WRKY54 | WRKY54 (WRKY DNA-binding protein 54); transcription factor | chr2:17007714-17009432 REVERSE	321.621	1021.19
Brapa_ESTC014039	AT2G20570	Symbols: GLK1, GPRI1 | GPRI1 (GOLDEN2-LIKE 1); transcription factor | chr2:8862567-8864603 FORWARD	1474.75	1019.23
Brapa_ESTC044489	AT2G20350	Symbols: | AP2 domain-containing transcription factor, putative | chr2:8791850-8792477 FORWARD	1322.42	1019.01
Brapa_ESTC033197	AT5G61420	Symbols: AtMYB28, MYB28 | MYB28 (myb domain protein 28); DNA binding / transcription factor | chr5:24706701-24708021 REVERSE	938.962	1017.18
Brapa_ESTC038363	AT4G02020	Symbols: SWN, SWINGER, EZA1 | EZA1 (SWINGER); transcription factor | chr4:886693-891743 FORWARD	978.85	1016.59
Brapa_ESTC033242	AT1G26960	Symbols: ATHB23 | ATHB23 (ARABIDOPSIS THALIANA HOMEOBOX PROTEIN 23); DNA binding / transcription factor | chr1:9356113-9357226 FORWARD	939.449	1016.13
Brapa_ESTC042131	AT2G46870	Symbols: NGA1 | NGA1 (NGATHA1); transcription factor | chr2:19268382-19269314 FORWARD	1224.2	1015.93
Brapa_ESTC029349	AT3G23890	Symbols: ATTOPII, TOPII | TOPII (TOPOISOMERASE II); ATP binding / DNA binding / DNA topoisomerase (ATP-hydrolyzing) | chr3:8624938-8631113 FORWARD	627.411	1010.62
Brapa_ESTC013409	AT3G13040	Symbols: | myb family transcription factor | chr3:4172422-4174463 REVERSE	1214.11	1009.42
Brapa_ESTC005402	AT3G16500	Symbols: IAA26, PAP1 | PAP1 (PHYTOCHROME-ASSOCIATED PROTEIN 1); transcription factor | chr3:5612807-5614214 REVERSE	1217.75	1006.7
Brapa_ESTC003275	AT2G33860	Symbols: ARF3, ETT | ETT (ETTIN); transcription factor | chr2:14332520-14335689 REVERSE	1568.89	1005.6
Brapa_ESTC042838	AT3G13000	| Symbols: | transcription factor | chr3:4158221-4160825 REVERSE	942.613	1003.64
Brapa_ESTC043842	AT1G17040	Symbols: | transcription factor-related | chr1:5825102-5828049 FORWARD	1285.28	1002.68
Brapa_ESTC017655	AT5G18830	Symbols: SPL7 | SPL7 (SQUAMOSA PROMOTER BINDING PROTEIN-LIKE 7); DNA binding / transcription factor | chr5:6276118-6280229 FORWARD	2432.74	1002.04
Brapa_ESTC024811	AT5G64810	Symbols: WRKY51 | WRKY51 (WRKY DNA-binding protein 51); transcription factor | chr5:25925641-25926913 FORWARD	154.901	1001.57
Brapa_ESTC039924	AT1G21910	Symbols: | AP2 domain-containing transcription factor family protein | chr1:7696644-7697336 FORWARD	1753.95	1001.09
Brapa_ESTC010865	AT5G13790	Symbols: AGL15 | AGL15 (AGAMOUS-LIKE 15); DNA binding / transcription factor | chr5:4449131-4450805 REVERSE	504.776	996.582
Brapa_ESTC029144	AT4G17600	Symbols: LIL3:1 | LIL3:1; transcription factor | chr4:9803772-9804727 FORWARD	615.29	993.572
Brapa_ESTC013013	AT2G47210	Symbols: | myb family transcription factor | chr2:19386109-19389274 FORWARD	1442.34	992.037
Brapa_ESTC020318	AT5G06960	Symbols: OBF5, TGA5 | OBF5 (OCS-ELEMENT BINDING FACTOR 5); DNA binding / transcription factor | chr5:2155743-2157401 FORWARD	767.624	991.695
Brapa_ESTC011969	AT3G20910	Symbols: | CCAAT-binding transcription factor (CBF-B/NF-YA) family protein | chr3:7326501-7328375 FORWARD	1080.1	989.715
Brapa_ESTC012776	AT2G02080	Symbols: ATIDD4 | ATIDD4 (ARABIDOPSIS THALIANA INDETERMINATE(ID)-DOMAIN 4); transcription factor | chr2:518327-521169 REVERSE	4104.22	989.193
Brapa_ESTC045129	AT4G35900	Symbols: FD-1, ATBZIP14, FD | FD (FD); DNA binding / transcription factor | chr4:17004749-17005617 FORWARD	692.586	985.489
Brapa_ESTC043353	AT3G27810	Symbols: AtMYB21, AtMYB3, MYB21, ATMYB21 | ATMYB21 (MYB DOMAIN PROTEIN 21); DNA binding / transcription factor | chr3:10308833-10311330 FORWARD	603.388	981.88
Brapa_ESTC014274	AT5G63790	Symbols: ANAC102 | ANAC102 (Arabidopsis NAC domain containing protein 102); transcription factor | chr5:25544113-25545239 REVERSE	969.388	971.586
Brapa_ESTC032281	AT3G22780	Symbols: TSO1 | TSO1 (CHINESE FOR 'UGLY'); transcription factor | chr3:8048934-8052065 FORWARD	914.152	970.687
Brapa_ESTC016771	AT2G35530	Symbols: | bZIP transcription factor family protein | chr2:14930359-14933104 REVERSE	1241.14	968.008
Brapa_ESTC024693	AT1G79020	Symbols: | transcription factor-related | chr1:29732175-29734952 REVERSE	1664.61	966.163
Brapa_ESTC005805	AT5G65790	Symbols: AtMYB68, MYB68 | MYB68 (myb domain protein 68); DNA binding / transcription factor | chr5:26340261-26341611 FORWARD	572.103	965.583
Brapa_ESTC007836	AT3G57390	Symbols: AGL18 | AGL18 (AGAMOUS-LIKE 18); transcription factor | chr3:21244887-21246712 FORWARD	610.406	963.514
Brapa_ESTC016737	AT5G65310	Symbols: ATHB5 | ATHB5 (ARABIDOPSIS THALIANA HOMEOBOX PROTEIN 5); transcription factor | chr5:26119683-26121443 REVERSE	2150.62	961.745
Brapa_ESTC006609	AT2G28550	Symbols: RAP2.7, TOE1 | TOE1 (TARGET OF EAT1 1); DNA binding / transcription factor | chr2:12233521-12235328 REVERSE	3052.99	961.609
Brapa_ESTC021431	AT2G02820	Symbols: AtMYB88, MYB88 | MYB88 (myb domain protein 88); DNA binding / transcription factor | chr2:804715-807138 REVERSE	2050.1	957.83
Brapa_ESTC046659	AT5G62260	| Symbols: | DNA binding | chr5:25026557-25028574 FORWARD	648.027	957.787
Brapa_ESTC041918	AT2G42380	Symbols: | bZIP transcription factor family protein | chr2:17654283-17655738 REVERSE	964.279	957.695
Brapa_ESTC010514	AT3G18380	Symbols: | sequence-specific DNA binding / transcription factor | chr3:6311008-6313187 REVERSE	3219.93	956.52
Brapa_ESTC010144	AT2G44940	Symbols: | AP2 domain-containing transcription factor TINY, putative | chr2:18544369-18545256 FORWARD	636.475	955.836
Brapa_ESTC015364	AT3G04670	Symbols: ATWRKY39, WRKY39 | WRKY39 (WRKY DNA-binding protein 39); transcription factor | chr3:1266743-1267697 REVERSE	1387.12	950.899
Brapa_ESTC013612	AT5G54680	Symbols: ILR3 | ILR3 (IAA-LEUCINE RESISTANT3); DNA binding / transcription factor | chr5:22234496-22236219 FORWARD	2682.86	948.292
Brapa_ESTC017244	AT5G20850	Symbols: RAD51, ATRAD51 | ATRAD51 (Arabidopsis thaliana Ras Associated with Diabetes protein 51); damaged DNA binding | chr5:7070760-7072862 REVERSE	377.648	946.12
Brapa_ESTC006168	AT3G13000	| Symbols: | transcription factor | chr3:4158221-4160825 REVERSE	760.494	939.688
Brapa_ESTC042261	AT2G03060	Symbols: | similar to AGL102, DNA binding / transcription factor [Arabidopsis thaliana] (TAIR:AT1G18750.1); similar to SRF-type transcription factor family protein [Oryza sativa (japonica cultivar-group)] (GB:ABA95182.1); contains InterPro domain transcription factor, MADS-box; (InterPro:IPR002100) | chr2:901613-903568 FORWARD	1016.23	938.619
Brapa_ESTC031735	AT1G67030	Symbols: ZFP6 | ZFP6 (ZINC FINGER PROTEIN 6); nucleic acid binding / transcription factor/ zinc ion binding | chr1:25020307-25020900 FORWARD	604.391	935.117
Brapa_ESTC032256	AT3G22880	Symbols: DMC1, ATDMC1 | ATDMC1 (RECA-LIKE GENE); ATP binding / DNA-dependent ATPase/ damaged DNA binding | chr3:8097955-8100747 REVERSE	1001.45	933.88
Brapa_ESTC030618	AT1G06850	Symbols: ATBZIP52 | bZIP transcription factor, putative | chr1:2105232-2106517 FORWARD	509.063	933.829
Brapa_ESTC046330	AT5G56110	Symbols: AtMYB80, AtMYB103 | AtMYB103/AtMYB80 (myb domain protein 103, myb domain protein 80); DNA binding / transcription factor | chr5:22736417-22737890 FORWARD	708.898	931.926
Brapa_ESTC040764	AT1G75390	Symbols: ATBZIP44 | bZIP transcription factor family protein | chr1:28295885-28296326 FORWARD	653.473	931.726
Brapa_ESTC011146	AT4G20010	Symbols: PTAC9, OSB2 | PTAC9 (PLASTID TRANSCRIPTIONALLY ACTIVE9); single-stranded DNA binding | chr4:10842138-10843999 FORWARD	1237.76	925.431
Brapa_ESTC022717	AT1G74930	Symbols: | AP2 domain-containing transcription factor, putative | chr1:28147900-28148487 FORWARD	1097.47	923.182
Brapa_ESTC020393	AT4G36820	| Symbols: | transcription factor | chr4:17346893-17347998 FORWARD	1150.82	919.521
Brapa_ESTC042190	AT2G47620	Symbols: CHB1, ATSWI3A | ATSWI3A (Arabidopsis thaliana switching protein 3A); DNA binding | chr2:19539104-19541321 FORWARD	675.703	917.301
Brapa_ESTC048839	AT1G51745	Symbols: | similar to ATP binding / DNA binding [Arabidopsis thaliana] (TAIR:AT3G21295.1); similar to Os04g0599100 [Oryza sativa (japonica cultivar-group)] (GB:NP_001053748.1); similar to Os01g0558500 [Oryza sativa (japonica cultivar-group)] (GB:NP_001043335.1); similar to serine-rich repeat protein [Streptococcus agalactiae] (GB:AAZ95526.1); contains InterPro domain PWWP; (InterPro:IPR000313) | …	1035.07	915.576
Brapa_ESTC030801	AT5G18270	Symbols: ANAC087 | ANAC087; transcription factor | chr5:6041243-6042745 REVERSE	5427.01	914.174
Brapa_ESTC023120	AT3G26744	Symbols: ICE1 | ICE1 (INDUCER OF CBF EXPRESSION 1); DNA binding | chr3:9834190-9836027 REVERSE	1055.71	912.547
Brapa_ESTC040330	AT1G67710	Symbols: ARR11 | ARR11 (RESPONSE REGULATOR 11); transcription factor/ two-component response regulator | chr1:25380657-25382568 REVERSE	840.002	909.072
Brapa_ESTC006194	AT1G18570	Symbols: AtMYB51, BW51A, BW51B, MYB51 | MYB51 (myb domain protein 51); DNA binding / transcription factor | chr1:6389758-6391019 FORWARD	1919.93	907.64
Brapa_ESTC001677	AT2G23790	Symbols: | similar to transcription factor [Arabidopsis thaliana] (TAIR:AT4G36820.1); similar to Os10g0501500 [Oryza sativa (japonica cultivar-group)] (GB:NP_001064986.1); similar to Protein of unknown function DUF607 [Medicago truncatula] (GB:ABE78504.1); similar to Os03g0233000 [Oryza sativa (japonica cultivar-group)] (GB:NP_001049472.1); contains InterPro domain Protein of unknown function DUF…	2599.19	906.03
Brapa_ESTC012428	AT2G47070	Symbols: SPL1 | SPL1 (SQUAMOSA PROMOTER BINDING PROTEIN-LIKE 1); DNA binding / transcription factor | chr2:19344214-19347622 FORWARD	790.869	905.106
Brapa_ESTC040620	AT1G78280	Symbols: | transcription factor jumonji (jmjC) domain-containing protein | chr1:29457716-29462011 FORWARD	1250.44	905
Brapa_ESTC019001	AT1G62700	Symbols: ANAC026, VND5 | VND5 (VASCULAR RELATED NAC-DOMAIN PROTEIN 5); transcription factor | chr1:23219883-23221581 REVERSE	974.073	904.426
Brapa_ESTC033732	AT2G16400	Symbols: BLH7 | BLH7 (BELL1-LIKE HOMEODOMAIN 7); DNA binding / transcription factor | chr2:7108572-7110282 REVERSE	1391.99	903.985
Brapa_ESTC010257	AT2G03340	Symbols: WRKY3 | WRKY3 (WRKY DNA-binding protein 3); transcription factor | chr2:1014721-1016933 REVERSE	4140.28	902.79
Brapa_ESTC009400	AT2G22540	Symbols: AGL22, SVP | SVP (SHORT VEGETATIVE PHASE); transcription factor | chr2:9587497-9590683 FORWARD	1306.47	902.123
Brapa_ESTC012017	AT2G43010	Symbols: SRL2, PIF4 | PIF4 (PHYTOCHROME INTERACTING FACTOR 4); DNA binding / transcription factor | chr2:17894080-17895900 FORWARD	1823.9	901.503
Brapa_ESTC015371	AT1G07370	Symbols: PCNA1 | PCNA1 (PROLIFERATING CELLULAR NUCLEAR ANTIGEN); DNA binding / DNA polymerase processivity factor | chr1:2263202-2264380 FORWARD	1497.89	899.769
Brapa_ESTC025251	AT5G06550	Symbols: | similar to transcription factor jumonji (jmjC) domain-containing protein [Arabidopsis thaliana] (TAIR:AT1G78280.1); similar to hypothetical protein DDBDRAFT_0205230 [Dictyostelium discoideum AX4] (GB:XP_641202.1); similar to Os11g0572800 [Oryza sativa (japonica cultivar-group)] (GB:NP_001068128.1); contains InterPro domain Cyclin-like F-box; (InterPro:IPR001810); contains InterPro doma…	3662.59	898.435
Brapa_ESTC007474	AT4G23550	Symbols: WRKY29 | WRKY29 (WRKY DNA-binding protein 29); transcription factor | chr4:12291841-12293098 FORWARD	812.179	896.546
Brapa_ESTC010857	AT3G50890	Symbols: ATHB28 | ATHB28 (ARABIDOPSIS THALIANA HOMEOBOX PROTEIN 28); DNA binding / transcription factor | chr3:18927401-18928150 FORWARD	365.477	894.792
Brapa_ESTC022760	AT3G50060	Symbols: | myb family transcription factor | chr3:18569129-18570034 REVERSE	2054.16	894.77
Brapa_ESTC041725	AT2G36010	Symbols: ATE2FA, E2F3 | E2F3 (E2F transcription factor-3) | chr2:15126767-15129972 FORWARD	4224.41	893.719
Brapa_ESTC017404	AT3G61250	Symbols: AtMYB17 | AtMYB17 (myb domain protein 17); DNA binding / transcription factor | chr3:22682281-22683526 FORWARD	758.803	893.201
Brapa_ESTC021700	AT2G34710	Symbols: ATHB14, ATHB-14, PHB-1D, PHB | PHB (PHABULOSA); DNA binding / transcription factor | chr2:14646627-14651072 REVERSE	869.007	890.758
Brapa_ESTC039544	AT1G13300	Symbols: | myb family transcription factor | chr1:4556974-4558588 FORWARD	791.695	889.514
Brapa_ESTC015780	AT1G04960	Symbols: | similar to bZIP family transcription factor [Arabidopsis thaliana] (TAIR:AT1G27000.1); similar to unknown [Striga asiatica] (GB:ABD98037.1); similar to Os05g0182700 [Oryza sativa (japonica cultivar-group)] (GB:NP_001054821.1); contains InterPro domain Protein of unknown function DUF1664; (InterPro:IPR012458) | chr1:1408020-1410672 REVERSE	4649.51	888.779
Brapa_ESTC014922	AT4G31550	Symbols: ATWRKY11, WRKY11 | WRKY11 (WRKY DNA-binding protein 11); transcription factor | chr4:15290071-15291464 REVERSE	2923.14	888.475
Brapa_ESTC041313	AT2G26280	Symbols: CID7 | CID7; ATP binding / damaged DNA binding | chr2:11195221-11197657 REVERSE	1475.83	887.93
Brapa_ESTC043417	AT3G49850	Symbols: TRB3, ATTRB3 | ATTRB3/TRB3 (TELOMERE REPEAT BINDING FACTOR 1); DNA binding / transcription factor | chr3:18500436-18501716 FORWARD	997.266	887.757
Brapa_ESTC044590	AT2G24120	Symbols: PDE319, SCA3 | PDE319/SCA3 (PIGMENT DEFECTIVE 319, SCABRA 3); DNA binding / DNA-directed RNA polymerase | chr2:10256438-10261610 REVERSE	2450.46	881.402
Brapa_ESTC017537	AT2G25180	Symbols: ARR12 | ARR12 (ARABIDOPSIS RESPONSE REGULATOR 12); transcription factor/ two-component response regulator | chr2:10731569-10734040 REVERSE	1166.89	881.271
Brapa_ESTC038934	AT5G59380	Symbols: MBD6 | MBD6 (methyl-CpG-binding domain 6); DNA binding | chr5:23969547-23970711 FORWARD	654.058	878.559
Brapa_ESTC021783	AT1G78080	Symbols: RAP2.4 | RAP2.4 (related to AP2 4); DNA binding / transcription factor | chr1:29369683-29370687 FORWARD	3594.43	877.951
Brapa_ESTC016050	AT3G22780	Symbols: TSO1 | TSO1 (CHINESE FOR 'UGLY'); transcription factor | chr3:8048934-8052065 FORWARD	573.133	877.583
Brapa_ESTC019071	AT3G59060	Symbols: PIF5, PIL6 | PIL6 (PHYTOCHROME-INTERACTING FACTOR 5); DNA binding / transcription factor | chr3:21839166-21840872 REVERSE	798.379	877.516
Brapa_ESTC039185	AT5G27610	Symbols: | DNA binding / transcription factor | chr5:9764855-9769709 FORWARD	1007.58	874.848
Brapa_ESTC024446	AT5G62260	| Symbols: | DNA binding | chr5:25026557-25028574 FORWARD	1147.42	873.796
Brapa_ESTC040661	AT1G77640	Symbols: | AP2 domain-containing transcription factor, putative | chr1:29183690-29184424 FORWARD	3107.64	872.304
Brapa_ESTC042570	AT2G03710	Symbols: AGL3, SEP4 | SEP4 (SEPALLATA4); DNA binding | chr2:1129619-1131239 FORWARD	1128.59	870.009
Brapa_ESTC047599	AT4G31550	Symbols: ATWRKY11, WRKY11 | WRKY11 (WRKY DNA-binding protein 11); transcription factor | chr4:15290071-15291464 REVERSE	1053.42	866.152
Brapa_ESTC042212	AT2G47460	Symbols: MYB12, AtMYB12 | MYB12 (myb domain protein 12); DNA binding / transcription factor/ transcriptional activator | chr2:19483508-19486312 FORWARD	1132.96	865.265
Brapa_ESTC041034	AT2G18350	Symbols: ATHB24 | ATHB24 (ARABIDOPSIS THALIANA HOMEOBOX PROTEIN 24); DNA binding / transcription factor | chr2:7978204-7978992 REVERSE	814.638	860.548
Brapa_ESTC026751	AT2G18350	Symbols: ATHB24 | ATHB24 (ARABIDOPSIS THALIANA HOMEOBOX PROTEIN 24); DNA binding / transcription factor | chr2:7978204-7978992 REVERSE	979.771	860.179
Brapa_ESTC017484	AT5G20240	Symbols: PI | PI (PISTILLATA); DNA binding / transcription factor | chr5:6829205-6831210 FORWARD	480.806	858.599
Brapa_ESTC008877	AT3G10800	Symbols: | bZIP transcription factor family protein | chr3:3379331-3381435 FORWARD	2867.43	858.458
Brapa_ESTC032857	AT1G01250	Symbols: | AP2 domain-containing transcription factor, putative | chr1:104731-105309 REVERSE	1142.94	854.768
Brapa_ESTC025130	AT1G72650	Symbols: TRFL6 | TRFL6 (TRF-LIKE 6); DNA binding / transcription factor | chr1:27353915-27357145 FORWARD	770.33	854.357
Brapa_ESTC004390	AT4G31550	Symbols: ATWRKY11, WRKY11 | WRKY11 (WRKY DNA-binding protein 11); transcription factor | chr4:15290071-15291464 REVERSE	1588.66	852.339
Brapa_ESTC026521	AT2G02730	Symbols: | similar to bZIP family transcription factor [Arabidopsis thaliana] (TAIR:AT1G27000.1); similar to bZIP transcription factor bZIP109 [Glycine max] (GB:ABI34660.1); contains InterPro domain Protein of unknown function DUF1664; (InterPro:IPR012458) | chr2:765279-767335 REVERSE	298.583	852.319
Brapa_ESTC035823	AT5G23260	Symbols: ABS, TT16 | TT16 (TRANSPARENT TESTA16); transcription factor | chr5:7836445-7838343 FORWARD	652.62	850.019
Brapa_ESTC017618	AT5G06839	Symbols: | bZIP family transcription factor | chr5:2120912-2126218 FORWARD	544.286	846.841
Brapa_ESTC037202	AT3G61970	Symbols: NGA2 | NGA2 (NGATHA2); transcription factor | chr3:22962804-22963703 FORWARD	1041.26	846.213
Brapa_ESTC042872	AT3G12730	Symbols: | myb family transcription factor | chr3:4047241-4048363 REVERSE	1628.19	845.274
Brapa_ESTC011738	AT5G13330	Symbols: RAP2.6L | RAP2.6L (related to AP2 6L); DNA binding / transcription factor | chr5:4272387-4274464 FORWARD	2015.51	844.401
Brapa_ESTC027613	AT4G28530	Symbols: ANAC074 | ANAC074 (Arabidopsis NAC domain containing protein 74); transcription factor | chr4:14090731-14094609 REVERSE	547.983	843.323
Brapa_ESTC006078	AT4G30080	Symbols: ARF16 | ARF16 (AUXIN RESPONSE FACTOR 16); miRNA binding / transcription factor | chr4:14703375-14705570 REVERSE	1272.78	840.951
Brapa_ESTC024443	AT1G09950	Symbols: | transcription factor-related | chr1:3240851-3241543 REVERSE	2852.65	839.936
Brapa_ESTC051120	AT3G13040	Symbols: | myb family transcription factor | chr3:4172422-4174463 REVERSE	660.545	838.731
Brapa_ESTC019095	AT4G31010	| Symbols: | DNA binding | chr4:15106714-15108452 FORWARD	1098.34	838.527
Brapa_ESTC021706	AT1G46480	Symbols: | homeobox-leucine zipper transcription factor family protein | chr1:17239343-17240393 REVERSE	887.217	837.501
Brapa_ESTC022552	AT1G64380	Symbols: | AP2 domain-containing transcription factor, putative | chr1:23894644-23895651 REVERSE	2270.46	836.249
Brapa_ESTC049459	AT2G02820	Symbols: AtMYB88, MYB88 | MYB88 (myb domain protein 88); DNA binding / transcription factor | chr2:804715-807138 REVERSE	1388.73	835.275
Brapa_ESTC014211	AT4G32040	Symbols: KNAT5 | KNAT5 (KNOTTED1-LIKE HOMEOBOX GENE 5); transcription factor | chr4:15494133-15496015 FORWARD	499.713	833.881
Brapa_ESTC019441	AT1G54330	Symbols: ANAC020 | ANAC020 (Arabidopsis NAC domain containing protein 20); transcription factor | chr1:20283382-20284556 REVERSE	889.156	833.653
Brapa_ESTC013362	AT5G65070	Symbols: FCL4, MAF4 | MAF4 (MADS AFFECTING FLOWERING 4); transcription factor | chr5:26009536-26013156 FORWARD	826.94	832.203
Brapa_ESTC008906	AT3G61740	Symbols: | similar to PHD finger protein-related / SET domain-containing protein (TX4) [Arabidopsis thaliana] (TAIR:AT4G27910.1); similar to SDG29 (SET DOMAIN GROUP 29), DNA binding [Arabidopsis thaliana] (TAIR:AT5G53430.1); similar to Histone-lysine N-methyltransferase ATX4 (Trithorax-homolog protein 4) (TRX-homolog protein 4) (Trithorax 4) (Protein SET DOMAIN GROUP 16) (GB:Q9SUE7); similar to P…	1345.65	830.485
Brapa_ESTC014435	AT1G77920	Symbols: | bZIP family transcription factor | chr1:29303853-29305501 FORWARD	335.118	829.015
Brapa_ESTC032286	AT5G57450	Symbols: ATXRCC3, XRCC3 | XRCC3 (Arabidopsis thaliana homolog of XRCC3); ATP binding / damaged DNA binding | chr5:23291234-23292148 REVERSE	861.654	828.245
Brapa_ESTC046434	AT5G58610	Symbols: | PHD finger transcription factor, putative | chr5:23703997-23708279 REVERSE	678.414	826.178
Brapa_ESTC026085	AT1G53320	Symbols: AtTLP7 | AtTLP7 (TUBBY LIKE PROTEIN 7); phosphoric diester hydrolase/ transcription factor | chr1:19894905-19897097 REVERSE	2748.91	825.674
Brapa_ESTC013559	AT4G01120	Symbols: ATBZIP54, GBF2 | GBF2 (G-BOX BINDING FACTOR 2); DNA binding / transcription factor | chr4:481929-483970 REVERSE	1594.06	822.488
Brapa_ESTC032517	AT3G24495	Symbols: MSH6-2, MSH7 | MSH7 (MUTS HOMOLOG 6-2); ATP binding / damaged DNA binding | chr3:8912425-8918093 REVERSE	451.439	821.703
Brapa_ESTC000238	AT1G32150	Symbols: | bZIP transcription factor family protein | chr1:11566002-11568297 FORWARD	2261.36	821.05
Brapa_ESTC032740	AT1G19210	Symbols: | AP2 domain-containing transcription factor, putative | chr1:6626964-6627521 REVERSE	893.999	820.115
Brapa_ESTC001700	AT2G35700	Symbols: | AP2 domain-containing transcription factor, putative | chr2:15012284-15012868 FORWARD	873.854	819.567
Brapa_ESTC036950	AT4G36570	Symbols: | myb family transcription factor | chr4:17254665-17255053 FORWARD	196.045	818.599
Brapa_ESTC008445	AT3G54990	Symbols: SMZ | SMZ (SCHLAFMUTZE); DNA binding / transcription factor | chr3:20384695-20387499 REVERSE	1176.2	817.457
Brapa_ESTC039507	AT1G12630	Symbols: | DNA binding / transcription factor/ transcriptional activator | chr1:4298895-4299473 FORWARD	1984.73	816.684
Brapa_ESTC032298	AT4G01120	Symbols: ATBZIP54, GBF2 | GBF2 (G-BOX BINDING FACTOR 2); DNA binding / transcription factor | chr4:481929-483970 REVERSE	2903.26	816.437
Brapa_ESTC017371	AT2G26280	Symbols: CID7 | CID7; ATP binding / damaged DNA binding | chr2:11195221-11197657 REVERSE	1757.67	815.316
Brapa_ESTC039635	AT1G16750	Symbols: | similar to transcription factor [Arabidopsis thaliana] (TAIR:AT3G13000.1); similar to Os06g0704100 [Oryza sativa (japonica cultivar-group)] (GB:NP_001058505.1); similar to hypothetical protein 24.t00022 [Brassica oleracea] (GB:ABD64944.1); similar to Os02g0153000 [Oryza sativa (japonica cultivar-group)] (GB:NP_001045923.1); contains InterPro domain Protein of unknown function DUF547; (…	467.971	812.518
Brapa_ESTC023402	AT2G33860	Symbols: ARF3, ETT | ETT (ETTIN); transcription factor | chr2:14332520-14335689 REVERSE	1074.97	812.273
Brapa_ESTC013840	AT4G36920	Symbols: FLO2, FL1, AP2 | AP2 (APETALA 2); transcription factor | chr4:17400995-17403137 FORWARD	585.504	806.498
Brapa_ESTC010284	AT1G19700	Symbols: BEL10 | BEL10 (BEL1-LIKE HOMEODOMAIN 10); DNA binding / transcription factor | chr1:6809949-6811845 REVERSE	1452.94	806.167
Brapa_ESTC030142	AT1G79020	Symbols: | transcription factor-related | chr1:29732175-29734952 REVERSE	1205.11	805.736
Brapa_ESTC013900	AT1G01720	Symbols: ANAC002, ATAF1 | ATAF1 (Arabidopsis NAC domain containing protein 2); transcription factor | chr1:268471-269514 FORWARD	1127.33	805.438
Brapa_ESTC001974	AT5G63790	Symbols: ANAC102 | ANAC102 (Arabidopsis NAC domain containing protein 102); transcription factor | chr5:25544113-25545239 REVERSE	68.4992	803.822
Brapa_ESTC003125	AT2G04038	Symbols: ATBZIP48 | bZIP transcription factor family protein | chr2:1331916-1332416 FORWARD	193.933	803.38
Brapa_ESTC018647	AT3G09600	Symbols: | DNA binding / transcription factor | chr3:2946464-2948205 FORWARD	683.044	800.155
Brapa_ESTC016879	AT4G16420	Symbols: PRZ1, ADA2B | ADA2B (PROPORZ1); DNA binding / transcription factor | chr4:9262828-9265798 REVERSE	705.28	799.77
Brapa_ESTC008294	AT4G00150	Symbols: | scarecrow-like transcription factor 6 (SCL6) | chr4:57429-59105 REVERSE	1149.2	798.487
Brapa_ESTC050962	AT3G01970	Symbols: ATWRKY45, WRKY45 | WRKY45 (WRKY DNA-binding protein 45); transcription factor | chr3:326621-327166 REVERSE	635.096	798.363
Brapa_ESTC011781	AT4G30935	Symbols: ATWRKY32, WRKY32 | WRKY32 (WRKY DNA-binding protein 32); transcription factor | chr4:15051922-15053914 REVERSE	1284.15	795.998
Brapa_ESTC035315	AT1G32030	| Symbols: | DNA binding | chr1:11514574-11515575 FORWARD	909.7	793.156
Brapa_ESTC036848	AT1G47870	Symbols: E2FC, ATE2F2, ATE2FC | E2FC (ARABIDOPSIS HOMOLOG OF E2F C); transcription factor | chr1:17637377-17639997 FORWARD	1235.8	791.635
Brapa_ESTC018596	AT5G28890	| Symbols: | DNA binding | chr5:10904106-10904804 REVERSE	670.878	788.305
Brapa_ESTC039380	AT1G08540	Symbols: SIGA, SIG2, SIGB | SIGB (SIGMA FACTOR B); DNA binding / DNA-directed RNA polymerase/ transcription factor | chr1:2703464-2706699 FORWARD	298.156	785.531
Brapa_ESTC045106	AT4G36160	Symbols: ANAC076, VND2 | ANAC076/VND2 (Arabidopsis NAC domain containing protein 76, VASCULAR-RELATED NAC-DOMAIN 2); transcription factor | chr4:17110880-17112894 REVERSE	557.227	784.358
Brapa_ESTC046300	AT4G26640	Symbols: ATWRKY20, WRKY20 | WRKY20 (WRKY DNA-binding protein 20); transcription factor | chr4:13437304-13440699 REVERSE	819.493	783.631
Brapa_ESTC030070	AT5G05550	| Symbols: | transcription factor | chr5:1639530-1640551 REVERSE	614.968	779.497
Brapa_ESTC021733	AT4G02560	Symbols: LD | LD (LUMINIDEPENDENS); transcription factor | chr4:1123656-1128252 REVERSE	823.049	778.349
Brapa_ESTC004990	AT3G03140	Symbols: | similar to ATP binding / DNA binding [Arabidopsis thaliana] (TAIR:AT3G21295.1); similar to Os04g0599100 [Oryza sativa (japonica cultivar-group)] (GB:NP_001053748.1); similar to Os02g0700000 [Oryza sativa (japonica cultivar-group)] (GB:NP_001047836.1); similar to Micronuclear linker histone polyprotein, putative [Solanum bulbocastanum] (GB:AAP45186.2); contains InterPro domain PWWP; (In…	1204.36	777.418
Brapa_ESTC021310	AT5G22290	Symbols: ANAC089 | ANAC089 (Arabidopsis NAC domain containing protein 89); transcription factor | chr5:7376047-7377501 REVERSE	977.516	776.966
Brapa_ESTC033483	AT1G71450	Symbols: | AP2 domain-containing transcription factor, putative | chr1:26930750-26931301 FORWARD	1626.4	774.394
Brapa_ESTC030000	AT1G67260	Symbols: TCP1 | TCP1 (TCP family transcription factor 3); transcription factor | chr1:25171891-25172970 REVERSE	423.036	772.385
Brapa_ESTC025120	AT2G30470	Symbols: HSI2 | HSI2 (High-level expression of Sugar-Inducible gene 2); transcription factor/ transcriptional repressor | chr2:12987981-12991801 REVERSE	899.537	769.985
Brapa_ESTC001172	AT4G31800	Symbols: WRKY18 | WRKY18 (WRKY DNA-binding protein 18); transcription factor | chr4:15383302-15384818 FORWARD	615.555	769.354
Brapa_ESTC045710	AT5G44210	Symbols: ERF9, ATERF9, ATERF-9 | ATERF-9/ATERF9/ERF9 (ERF domain protein 9); DNA binding / transcription factor/ transcriptional repressor | chr5:17823969-17824571 FORWARD	314.758	769.2
Brapa_ESTC015904	AT1G13960	Symbols: WRKY4 | WRKY4 (WRKY DNA-binding protein 4); transcription factor | chr1:4776619-4779040 FORWARD	1320.12	769.109
Brapa_ESTC024302	AT1G30210	Symbols: TCP24 | TCP24; transcription factor | chr1:10628738-10629712 REVERSE	1001.11	768.974
Brapa_ESTC030500	AT4G34990	Symbols: AtMYB32 | AtMYB32 (myb domain protein 32); DNA binding / transcription factor | chr4:16661375-16662294 REVERSE	2017.94	766.66
Brapa_ESTC017984	AT5G19840	Symbols: | transcription factor jumonji (jmjC) domain-containing protein | chr5:6705374-6709384 FORWARD	1443.23	765.093
Brapa_ESTC025078	AT1G21450	Symbols: SCL1 | SCL1 (SCARECROW-LIKE 1); transcription factor | chr1:7509710-7511491 FORWARD	1006.86	762.955
Brapa_ESTC005763	AT1G24267	Symbols: | similar to unknown protein [Arabidopsis thaliana] (TAIR:AT1G24265.2); similar to bZIP transcription factor bZIP56 [Glycine max] (GB:ABI34646.1); contains InterPro domain Protein of unknown function DUF1664; (InterPro:IPR012458) | chr1:8604440-8607230 REVERSE	2929.95	761.738
Brapa_ESTC024186	AT5G62020	Symbols: HSFB2A, AT-HSFB2A | AT-HSFB2A (Arabidopsis thaliana heat shock transcription factor B2A); DNA binding / transcription factor | chr5:24933438-24934420 FORWARD	1109.95	760.848
Brapa_ESTC028621	AT1G25470	Symbols: | AP2 domain-containing transcription factor, putative | chr1:8944888-8945751 REVERSE	1448.45	760.733
Brapa_ESTC036338	AT2G35530	Symbols: | bZIP transcription factor family protein | chr2:14930359-14933104 REVERSE	694.763	759.069
Brapa_ESTC036842	AT5G10030	Symbols: OBF4, TGA4 | TGA4 (TGACG MOTIF-BINDING FACTOR 4); DNA binding / calmodulin binding / transcription factor | chr5:3137649-3139296 REVERSE	638.456	758.474
Brapa_ESTC025427	AT1G25250	Symbols: ATIDD16 | ATIDD16 (ARABIDOPSIS THALIANA INDETERMINATE(ID)-DOMAIN 16); nucleic acid binding / transcription factor/ zinc ion binding | chr1:8849536-8851507 FORWARD	1023.09	753.485
Brapa_ESTC015361	AT2G03470	Symbols: | myb family transcription factor / ELM2 domain-containing protein | chr2:1045691-1047127 REVERSE	1216.87	750.463
Brapa_ESTC045715	AT5G15800	Symbols: AGL2, SEP1 | SEP1 (SEPALLATA1); DNA binding / transcription factor | chr5:5151597-5153770 REVERSE	445.757	749.953
Brapa_ESTC026375	AT5G59380	Symbols: MBD6 | MBD6 (methyl-CpG-binding domain 6); DNA binding | chr5:23969547-23970711 FORWARD	843.813	748.543
Brapa_ESTC032383	AT5G08130	Symbols: BIM1 | BIM1 (BES1-interacting Myc-like protein 1); DNA binding / transcription factor | chr5:2606656-2608653 REVERSE	700.647	747.406
Brapa_ESTC014994	AT5G60690	Symbols: IFL, IFL1, REV | REV (REVOLUTA); DNA binding / lipid binding / transcription factor | chr5:24414960-24419159 FORWARD	618.614	745.987
Brapa_ESTC040922	AT1G52880	Symbols: ANAC018, ATNAM, NAM | NAM (Arabidopsis NAC domain containing protein 18); transcription factor | chr1:19692953-19694098 REVERSE	1673.6	743.215
Brapa_ESTC037419	AT1G57820	Symbols: VIM1 | VIM1 (VARIANT IN METHYLATION 1); DNA binding | chr1:21418007-21421567 REVERSE	707.241	741.603
Brapa_ESTC024537	AT1G51190	Symbols: PLT2 | PLT2 (PLETHORA 2); transcription factor | chr1:18981185-18983973 FORWARD	455.45	740.637
Brapa_ESTC037584	AT3G05545	Symbols: | transcription factor, putative / zinc finger (C3HC4 type RING finger) family protein | chr3:1609442-1612139 FORWARD	775.192	740.203
Brapa_ESTC013117	AT3G04730	Symbols: IAA16 | IAA16 (indoleacetic acid-induced protein 16); transcription factor | chr3:1288999-1290421 REVERSE	421.496	736.414
Brapa_ESTC046705	AT5G65790	Symbols: AtMYB68, MYB68 | MYB68 (myb domain protein 68); DNA binding / transcription factor | chr5:26340261-26341611 FORWARD	487.698	735.807
Brapa_ESTC009554	AT2G37550	Symbols: AGD7, ASP1 | ASP1 (PDE1 SUPPRESSOR 1); DNA binding | chr2:15762622-15764534 REVERSE	1018.6	734.252
Brapa_ESTC018007	AT4G38620	Symbols: ATMYB4, MYB4 | MYB4 (myb domain protein 4); transcription factor | chr4:18053860-18054870 FORWARD	1723.43	733.972
Brapa_ESTC018569	AT4G34610	Symbols: BLH6 | BLH6 (BELL1-LIKE HOMEODOMAIN 5); DNA binding / transcription factor | chr4:16530551-16532503 REVERSE	397.38	732.965
Brapa_ESTC020585	AT3G15540	Symbols: MSG2, IAA19 | IAA19 (indoleacetic acid-induced protein 19); transcription factor | chr3:5264107-5265385 FORWARD	536.414	729.69
Brapa_ESTC010374	AT2G23790	Symbols: | similar to transcription factor [Arabidopsis thaliana] (TAIR:AT4G36820.1); similar to Os10g0501500 [Oryza sativa (japonica cultivar-group)] (GB:NP_001064986.1); similar to Protein of unknown function DUF607 [Medicago truncatula] (GB:ABE78504.1); similar to Os03g0233000 [Oryza sativa (japonica cultivar-group)] (GB:NP_001049472.1); contains InterPro domain Protein of unknown function DUF…	2596.63	729.268
Brapa_ESTC046078	AT5G45580	| Symbols: | transcription factor | chr5:18498319-18499825 REVERSE	383.574	728.953
Brapa_ESTC012484	AT1G22190	Symbols: | AP2 domain-containing transcription factor, putative | chr1:7836234-7837019 FORWARD	2424.94	727.085
Brapa_ESTC010088	AT5G64340	Symbols: SAC51 | SAC51 (SUPPRESSOR OF ACAULIS 51); transcription factor/ transcription regulator | chr5:25748116-25749162 REVERSE	1580.9	726.704
Brapa_ESTC041268	AT1G57820	Symbols: VIM1 | VIM1 (VARIANT IN METHYLATION 1); DNA binding | chr1:21418007-21421567 REVERSE	608.483	723.32
Brapa_ESTC048653	AT1G49950	Symbols: ATTRB1, TRB1 | ATTRB1/TRB1 (TELOMERE REPEAT BINDING FACTOR 1); DNA binding / transcription factor | chr1:18498107-18500381 REVERSE	425.07	722.538
Brapa_ESTC009624	AT1G54160	Symbols: | CCAAT-binding transcription factor (CBF-B/NF-YA) family protein | chr1:20221248-20222373 REVERSE	458.975	719.76
Brapa_ESTC032303	AT4G01060	Symbols: | DNA binding / transcription factor | chr4:460534-460967 FORWARD	536.248	716.67
Brapa_ESTC035674	AT4G21440	Symbols: ATMYB102, ATM4 | ATM4/ATMYB102 (ARABIDOPSIS MYB-LIKE 102); DNA binding / transcription factor | chr4:11418436-11419663 REVERSE	221.877	712.515
Brapa_ESTC006902	AT1G68130	Symbols: ATIDD14 | ATIDD14 (ARABIDOPSIS THALIANA INDETERMINATE(ID)-DOMAIN 14); nucleic acid binding / transcription factor/ zinc ion binding | chr1:25536147-25537980 FORWARD	1246.79	710.137
Brapa_ESTC046702	AT5G65790	Symbols: AtMYB68, MYB68 | MYB68 (myb domain protein 68); DNA binding / transcription factor | chr5:26340261-26341611 FORWARD	493.258	708.51
Brapa_ESTC010759	AT5G04410	Symbols: ANAC078, NAC2 | NAC2 (Arabidopsis NAC domain containing protein 78); transcription factor | chr5:1243981-1246417 FORWARD	793.338	706.527
Brapa_ESTC047740	AT3G28730	Symbols: SSRP1, NFD, ATHMG | ATHMG (HIGH MOBILITY GROUP, STRUCTURE-SPECIFIC RECOGNITION PROTEIN 1); transcription factor | chr3:10786191-10789735 FORWARD	2236.59	704.859
Brapa_ESTC013837	AT3G20310	Symbols: ATERF-7, ATERF7, ERF7 | ERF7 (ETHYLINE RESPONSE FACTOR7); DNA binding / protein binding / transcription factor/ transcriptional repressor | chr3:7085963-7086697 REVERSE	682.613	701.614
Brapa_ESTC032850	AT1G01380	Symbols: ETC1 | ETC1 (ENHANCER OF TRY AND CPC 1); DNA binding / transcription factor | chr1:147267-147740 FORWARD	387.35	699.576
Brapa_ESTC025226	AT3G48770	Symbols: | ATP binding / DNA binding | chr3:18090246-18097802 REVERSE	884.936	698.541
Brapa_ESTC034123	AT1G69810	Symbols: ATWRKY36, WRKY36 | WRKY36 (WRKY DNA-binding protein 36); transcription factor | chr1:26280901-26282779 REVERSE	739.015	697.789
Brapa_ESTC002593	AT3G19860	| Symbols: | DNA binding | chr3:6903848-6905869 FORWARD	1401.97	696.601
Brapa_ESTC017036	AT1G26310	Symbols: CAL1, AGL10, CAL | CAL (CAULIFLOWER); DNA binding / transcription factor | chr1:9100317-9103497 REVERSE	587.147	696.524
Brapa_ESTC013600	AT1G72010	Symbols: | TCP family transcription factor, putative | chr1:27111506-27112633 FORWARD	1293.26	694.823
Brapa_ESTC018537	AT1G32750	Symbols: HAF1, HAC13, GTD1, HAF01 | HAF01 (Histone acetyltransferase TAFII250 family); DNA binding | chr1:11846365-11856241 REVERSE	446.732	694.651
Brapa_ESTC023358	AT5G57450	Symbols: ATXRCC3, XRCC3 | XRCC3 (Arabidopsis thaliana homolog of XRCC3); ATP binding / damaged DNA binding | chr5:23291234-23292148 REVERSE	1300.83	694.229
Brapa_ESTC036995	AT5G61850	Symbols: LFY3, LFY | LFY (LEAFY); transcription factor | chr5:24861521-24864159 FORWARD	653.124	692.782
Brapa_ESTC006907	AT5G45140	Symbols: NRPC2 | NRPC2 (nuclear RNA polymerase C 2); DNA binding / DNA-directed RNA polymerase | chr5:18264643-18274940 REVERSE	1535.76	691.731
Brapa_ESTC013833	AT5G57780	Symbols: | similar to transcription factor [Arabidopsis thaliana] (TAIR:AT4G30410.1); similar to hypothetical protein [Oryza sativa (japonica cultivar-group)] (GB:BAD19120.1); similar to Os02g0178700 [Oryza sativa (japonica cultivar-group)] (GB:NP_001046079.1); similar to Os06g0653200 [Oryza sativa (japonica cultivar-group)] (GB:NP_001058239.1); contains InterPro domain Helix-loop-helix DNA-bindi…	500.304	690.698
Brapa_ESTC025271	AT1G15480	| Symbols: | DNA binding | chr1:5318302-5320417 FORWARD	617.861	690.109
Brapa_ESTC023948	AT3G18090	Symbols: NRPD2b | NRPD2b (nuclear RNA polymerase D 2b); DNA binding / DNA-directed RNA polymerase | chr3:6195329-6200210 FORWARD	781.717	687.121
Brapa_ESTC022824	AT2G47210	Symbols: | myb family transcription factor | chr2:19386109-19389274 FORWARD	815.647	686.817
Brapa_ESTC025339	AT1G21450	Symbols: SCL1 | SCL1 (SCARECROW-LIKE 1); transcription factor | chr1:7509710-7511491 FORWARD	2617.77	684.316
Brapa_ESTC021456	AT5G47230	Symbols: ATERF-5, ATERF5, ERF5 | ERF5 (ETHYLENE RESPONSIVE ELEMENT BINDING FACTOR 5); DNA binding / transcription factor/ transcriptional activator | chr5:19197299-19198201 FORWARD	818.733	683.841
Brapa_ESTC038338	AT3G62670	Symbols: MEE41, ARR20 | ARR20 (ARABIDOPSIS RESPONSE REGULATOR 20); transcription factor/ two-component response regulator | chr3:23187532-23189270 REVERSE	328.221	683.666
Brapa_ESTC015152	AT5G53290	Symbols: CRF3 | CRF3 (CYTOKININ RESPONSE FACTOR 3); DNA binding / transcription factor | chr5:21635187-21636251 REVERSE	1493.97	682.192
Brapa_ESTC039469	AT1G09540	Symbols: MYB61, AtMYB61 | MYB61 (myb domain protein 61); DNA binding / transcription factor | chr1:3086335-3087691 FORWARD	772.008	680.976
Brapa_ESTC016683	AT1G77450	Symbols: ANAC032 | ANAC032 (Arabidopsis NAC domain containing protein 32); transcription factor | chr1:29104923-29105875 FORWARD	1328.28	679.096
Brapa_ESTC044174	AT4G18960	Symbols: AG | AG (AGAMOUS); transcription factor | chr4:10383928-10388283 FORWARD	775.327	678.224
Brapa_ESTC021958	AT2G27230	Symbols: | transcription factor-related | chr2:11657973-11660918 FORWARD	1926.07	677.19
Brapa_ESTC012826	AT1G68550	Symbols: | AP2 domain-containing transcription factor, putative | chr1:25729473-25730447 REVERSE	457.393	676.581
Brapa_ESTC029740	AT3G50870	Symbols: MNP | MNP (MONOPOLE); transcription factor | chr3:18922093-18923350 FORWARD	809.496	675.515
Brapa_ESTC017813	AT5G09250	Symbols: KIWI | KIWI; DNA binding / transcription coactivator | chr5:2875422-2876369 REVERSE	163.842	674.467
Brapa_ESTC039104	AT5G49520	Symbols: ATWRKY48, WRKY48 | WRKY48 (WRKY DNA-binding protein 48); transcription factor | chr5:20108116-20110093 FORWARD	7206.7	673.194
Brapa_ESTC012323	AT4G36920	Symbols: FLO2, FL1, AP2 | AP2 (APETALA 2); transcription factor | chr4:17400995-17403137 FORWARD	794.038	673.09
Brapa_ESTC018131	AT1G24260	Symbols: AGL9, SEP3 | SEP3 (SEPALLATA3); transcription factor | chr1:8593779-8595851 REVERSE	703.288	671.057
Brapa_ESTC024956	AT2G43140	Symbols: | DNA binding / transcription factor | chr2:17939453-17942716 REVERSE	790.164	669.033
Brapa_ESTC022786	AT2G44745	Symbols: | WRKY family transcription factor | chr2:18454557-18456079 REVERSE	250.451	668.001
Brapa_ESTC000467	AT4G02060	Symbols: MCM7, PRL | PRL (PROLIFERA); ATP binding / DNA binding / DNA-dependent ATPase | chr4:901484-905297 FORWARD	372.243	664.87
Brapa_ESTC009955	AT4G15020	Symbols: | similar to DNA binding / protein dimerization [Arabidopsis thaliana] (TAIR:AT3G22220.2); similar to Os03g0822900 [Oryza sativa (japonica cultivar-group)] (GB:NP_001051738.1); similar to hypothetical protein [Oryza sativa (japonica cultivar-group)] (GB:AAO18451.1); contains InterPro domain Viral capsid/hemagglutinin protein; (InterPro:IPR008980); contains InterPro domain Protein of unkn…	1272.83	664.806
Brapa_ESTC043203	AT3G21295	Symbols: | ATP binding / DNA binding | chr3:7489641-7492302 FORWARD	1300.28	663.561
Brapa_ESTC021541	AT1G78080	Symbols: RAP2.4 | RAP2.4 (related to AP2 4); DNA binding / transcription factor | chr1:29369683-29370687 FORWARD	3932.47	661.971
Brapa_ESTC005445	AT3G21295	Symbols: | ATP binding / DNA binding | chr3:7489641-7492302 FORWARD	1377.01	661.266
Brapa_ESTC008132	AT5G20240	Symbols: PI | PI (PISTILLATA); DNA binding / transcription factor | chr5:6829205-6831210 FORWARD	263.128	659.425
Brapa_ESTC008204	AT1G19850	Symbols: ARF5, IAA24, MP | MP (MONOPTEROS); transcription factor | chr1:6887344-6891173 FORWARD	1134.06	659.375
Brapa_ESTC025869	AT2G40950	Symbols: | bZIP transcription factor family protein | chr2:17094901-17097404 REVERSE	552.538	658.92
Brapa_ESTC015264	AT1G13450	| Symbols: | DNA binding protein GT-1 | chr1:4612996-4615112 REVERSE	1954.18	658.451
Brapa_ESTC015321	AT3G23250	Symbols: MYB15, AtY19, AtMYB15 | AtMYB15/AtY19/MYB15 (myb domain protein 15); DNA binding / transcription factor | chr3:8309499-8310631 FORWARD	479.468	657.873
Brapa_ESTC039670	AT1G17040	Symbols: | transcription factor-related | chr1:5825102-5828049 FORWARD	506.674	655.051
Brapa_ESTC043278	AT3G23250	Symbols: MYB15, AtY19, AtMYB15 | AtMYB15/AtY19/MYB15 (myb domain protein 15); DNA binding / transcription factor | chr3:8309499-8310631 FORWARD	355.724	653.826
Brapa_ESTC018932	AT1G63490	Symbols: | transcription factor jumonji (jmjC) domain-containing protein | chr1:23548603-23555611 REVERSE	802.709	652.855
Brapa_ESTC021435	AT1G71030	Symbols: ATMYBL2 | ATMYBL2 (Arabidopsis myb-like 2); DNA binding / transcription factor | chr1:26799045-26799888 REVERSE	466.649	652.607
Brapa_ESTC038174	AT5G03780	Symbols: TRFL10 | TRFL10 (TRF-LIKE 10); DNA binding | chr5:999265-1000946 REVERSE	526.491	648.255
Brapa_ESTC045280	AT5G03790	Symbols: ATHB51, LMI1 | ATHB51/LMI1 (LATE MERISTEM IDENTITY1); DNA binding / transcription factor | chr5:1004984-1006372 FORWARD	526.641	642.782
Brapa_ESTC040194	AT1G29950	Symbols: | similar to transcription factor/ transcription regulator [Arabidopsis thaliana] (TAIR:AT5G50010.1); similar to Helix-loop-helix DNA-binding [Medicago truncatula] (GB:ABE90109.1); contains InterPro domain Helix-loop-helix DNA-binding; (InterPro:IPR011598); contains InterPro domain Basic helix-loop-helix dimerisation region bHLH; (InterPro:IPR001092) | chr1:10493445-10494200 FORWARD	2083.14	640.574
Brapa_ESTC023089	AT3G54280	Symbols: | ATP binding / DNA binding / helicase | chr3:20103339-20114785 FORWARD	534.55	638.285
Brapa_ESTC036477	AT5G25470	| Symbols: | DNA binding | chr5:8865857-8867237 REVERSE	662.583	637.818
Brapa_ESTC017040	AT1G15360	Symbols: SHN1, WIN1 | SHN1/WIN1 (SHINE1); DNA binding / transcription factor | chr1:5283604-5284501 FORWARD	785.211	637.278
Brapa_ESTC007013	AT2G26280	Symbols: CID7 | CID7; ATP binding / damaged DNA binding | chr2:11195221-11197657 REVERSE	2283.17	632.929
Brapa_ESTC020223	AT1G24267	Symbols: | similar to unknown protein [Arabidopsis thaliana] (TAIR:AT1G24265.2); similar to bZIP transcription factor bZIP56 [Glycine max] (GB:ABI34646.1); contains InterPro domain Protein of unknown function DUF1664; (InterPro:IPR012458) | chr1:8604440-8607230 REVERSE	2628.03	631.005
Brapa_ESTC034127	AT4G36900	Symbols: RAP2.10 | RAP2.10 (related to AP2 10); DNA binding / transcription factor | chr4:17389012-17389602 FORWARD	2101.51	628.694
Brapa_ESTC017998	AT1G25280	Symbols: AtTLP10 | AtTLP10 (TUBBY LIKE PROTEIN 10); phosphoric diester hydrolase/ transcription factor | chr1:8865663-8866595 FORWARD	832.015	628.046
Brapa_ESTC016802	AT4G32040	Symbols: KNAT5 | KNAT5 (KNOTTED1-LIKE HOMEOBOX GENE 5); transcription factor | chr4:15494133-15496015 FORWARD	7696.95	627.717
Brapa_ESTC008010	AT3G27810	Symbols: AtMYB21, AtMYB3, MYB21, ATMYB21 | ATMYB21 (MYB DOMAIN PROTEIN 21); DNA binding / transcription factor | chr3:10308833-10311330 FORWARD	338.748	627.248
Brapa_ESTC029976	AT5G24850	Symbols: CRY3 | CRY3 (CRYPTOCHROME 3); DNA binding / DNA photolyase/ FMN binding | chr5:8535402-8538019 REVERSE	339.379	627.24
Brapa_ESTC034714	AT3G24650	Symbols: ABI3 | ABI3 (ABA INSENSITIVE 3); DNA binding / transcription factor/ transcriptional activator | chr3:8997918-9000787 FORWARD	781.761	626.942
Brapa_ESTC020098	AT5G67580	Symbols: TRB2, ATTRB2 | ATTRB2/TRB2 (TELOMERE REPEAT BINDING FACTOR 2); DNA binding / transcription factor | chr5:26973069-26974299 REVERSE	520.749	626.651
Brapa_ESTC047470	AT4G35800	Symbols: RNA_POL_II_LSRNA_POL_II_LS, RNA_POL_II_LS, RPB1, NRPB1 | NRPB1 (RNA POLYMERASE II LARGE SUBUNIT); DNA binding / DNA-directed RNA polymerase | chr4:16961119-16967896 REVERSE	1456.1	625.37
Brapa_ESTC018546	AT3G61830	Symbols: ARF18 | ARF18 (AUXIN RESPONSE FACTOR 18); transcription factor | chr3:22899146-22902154 FORWARD	843.148	625.023
Brapa_ESTC017031	AT1G18750	Symbols: AGL102 | AGL102; DNA binding / transcription factor | chr1:6467395-6469689 FORWARD	345.12	624.582
Brapa_ESTC047767	AT1G26960	Symbols: ATHB23 | ATHB23 (ARABIDOPSIS THALIANA HOMEOBOX PROTEIN 23); DNA binding / transcription factor | chr1:9356113-9357226 FORWARD	472.893	622.237
Brapa_ESTC042201	AT2G01280	Symbols: MEE65 | MEE65 (maternal effect embryo arrest 65); RNA polymerase II transcription factor/ cation:chloride symporter | chr2:145675-148783 FORWARD	472.083	621.843
Brapa_ESTC039112	AT5G49240	Symbols: PRR4, APRR4 | APRR4 (PSEUDO-RESPONSE REGULATOR 4); transcription factor/ two-component response regulator | chr5:19980160-19981577 FORWARD	466.763	620.803
Brapa_ESTC016813	AT5G52510	Symbols: | scarecrow-like transcription factor 8 (SCL8) | chr5:21324422-21326344 FORWARD	675.279	618.497
Brapa_ESTC028308	AT3G54810	Symbols: BME3-ZF, BME3 | BME3/BME3-ZF (BLUE MICROPLYLAR END3); transcription factor | chr3:20307935-20309214 FORWARD	13724.3	616.274
Brapa_ESTC015081	AT3G19580	Symbols: AZF2 | AZF2 (ARABIDOPSIS ZINC-FINGER PROTEIN 2); nucleic acid binding / transcription factor/ zinc ion binding | chr3:6803299-6804120 REVERSE	1781.28	613.881
Brapa_ESTC035085	AT3G57660	Symbols: NRPA1 | NRPA1 (nuclear RNA polymerase A 1); DNA binding / DNA-directed RNA polymerase | chr3:21364723-21373791 FORWARD	1895.4	613.592
Brapa_ESTC038047	AT4G17760	Symbols: | damaged DNA binding / exonuclease | chr4:9871833-9873270 FORWARD	2330.21	611.942
Brapa_ESTC021483	AT4G17500	Symbols: ATERF-1 | ATERF-1 (ETHYLENE RESPONSIVE ELEMENT BINDING FACTOR 1); DNA binding / transcription factor/ transcriptional activator | chr4:9759658-9760224 FORWARD	608.496	611.302
Brapa_ESTC040406	AT1G69180	Symbols: CRC | CRC (CRABS CLAW); transcription factor | chr1:26011397-26012603 REVERSE	490.288	611.035
Brapa_ESTC037550	AT2G40750	Symbols: ATWRKY54, WRKY54 | WRKY54 (WRKY DNA-binding protein 54); transcription factor | chr2:17007714-17009432 REVERSE	89.5583	609.248
Brapa_ESTC040868	AT1G79840	Symbols: GL2 | GL2 (GLABRA 2); DNA binding / transcription factor | chr1:30042419-30045906 FORWARD	780.458	608.601
Brapa_ESTC026160	AT5G04410	Symbols: ANAC078, NAC2 | NAC2 (Arabidopsis NAC domain containing protein 78); transcription factor | chr5:1243981-1246417 FORWARD	1792.11	608.175
Brapa_ESTC002255	AT5G04340	Symbols: C2H2 | C2H2; nucleic acid binding / transcription factor/ zinc ion binding | chr5:1216322-1217038 REVERSE	965.997	607.947
Brapa_ESTC009238	AT1G47270	Symbols: AtTLP6 | AtTLP6 (TUBBY LIKE PROTEIN 6); phosphoric diester hydrolase/ transcription factor | chr1:17329268-17331004 FORWARD	630.044	606.487
Brapa_ESTC051495	AT1G04960	Symbols: | similar to bZIP family transcription factor [Arabidopsis thaliana] (TAIR:AT1G27000.1); similar to unknown [Striga asiatica] (GB:ABD98037.1); similar to Os05g0182700 [Oryza sativa (japonica cultivar-group)] (GB:NP_001054821.1); contains InterPro domain Protein of unknown function DUF1664; (InterPro:IPR012458) | chr1:1408020-1410672 REVERSE	1649.46	606.115
Brapa_ESTC050760	AT2G37550	Symbols: AGD7, ASP1 | ASP1 (PDE1 SUPPRESSOR 1); DNA binding | chr2:15762622-15764534 REVERSE	434.423	605.848
Brapa_ESTC000416	AT5G54680	Symbols: ILR3 | ILR3 (IAA-LEUCINE RESISTANT3); DNA binding / transcription factor | chr5:22234496-22236219 FORWARD	1886.78	605.829
Brapa_ESTC006517	AT5G24120	Symbols: SIG5, SIGE | SIGE (RNA polymerase sigma subunit E); DNA binding / DNA-directed RNA polymerase/ sigma factor/ transcription factor | chr5:8157797-8159749 REVERSE	523.924	604.35
Brapa_ESTC047512	AT1G50640	Symbols: ERF3, ATERF3 | ATERF3/ERF3 (ETHYLENE RESPONSIVE ELEMENT BINDING FACTOR 3); DNA binding / protein binding / transcription factor/ transcriptional repressor | chr1:18761270-18761947 REVERSE	1016.97	600.461
Brapa_ESTC038367	AT4G02060	Symbols: MCM7, PRL | PRL (PROLIFERA); ATP binding / DNA binding / DNA-dependent ATPase | chr4:901484-905297 FORWARD	360.159	599.244
Brapa_ESTC000880	AT1G69690	Symbols: | TCP family transcription factor, putative | chr1:26220112-26221089 FORWARD	107.82	598.134
Brapa_ESTC036337	AT2G35530	Symbols: | bZIP transcription factor family protein | chr2:14930359-14933104 REVERSE	852.546	597.499
Brapa_ESTC027983	AT5G13820	Symbols: ATBP-1, ATBP1, ATTBP1, HPPBF-1, TBP1 | TBP1 (TELOMERIC DNA binding PROTEIN 1); DNA binding | chr5:4461697-4464358 FORWARD	377.377	597.368
Brapa_ESTC040255	AT1G30810	Symbols: | transcription factor jumonji (jmj) family protein / zinc finger (C5HC2 type) family protein | chr1:10938121-10941486 REVERSE	632.12	593.751
Brapa_ESTC000954	AT4G02060	Symbols: MCM7, PRL | PRL (PROLIFERA); ATP binding / DNA binding / DNA-dependent ATPase | chr4:901484-905297 FORWARD	376.468	590.686
Brapa_ESTC044960	AT4G33450	Symbols: AtMYB69 | AtMYB69 (myb domain protein 69); DNA binding / transcription factor | chr4:16095749-16096606 REVERSE	453.087	590.095
Brapa_ESTC024799	AT3G12977	| Symbols: | DNA binding | chr3:4143839-4145867 FORWARD	756.118	589.674
Brapa_ESTC007300	AT3G01470	Symbols: ATHB1, HD-ZIP-1, HAT5, ATHB-1 | ATHB-1 (Homeobox-leucine zipper protein HAT5); transcription factor | chr3:182655-184041 REVERSE	1184.72	588.762
Brapa_ESTC017152	AT1G19850	Symbols: ARF5, IAA24, MP | MP (MONOPTEROS); transcription factor | chr1:6887344-6891173 FORWARD	443.37	588.151
Brapa_ESTC015548	AT1G09710	| Symbols: | DNA binding | chr1:3141121-3144234 FORWARD	1353.19	587.47
Brapa_ESTC024089	AT3G04070	Symbols: ANAC047 | ANAC047 (Arabidopsis NAC domain containing protein 47); transcription factor | chr3:1061580-1062983 REVERSE	1293.48	586.184
Brapa_ESTC012125	AT4G02210	Symbols: | similar to DNA binding [Arabidopsis thaliana] (TAIR:AT2G24960.1); similar to Cyclin-like F-box [Medicago truncatula] (GB:ABE91509.1); similar to Cyclin-like F-box [Medicago truncatula] (GB:ABE83597.1) | chr4:974320-975917 REVERSE	437.426	584.692
Brapa_ESTC022527	AT5G25810	Symbols: TNY | TNY (TINY); DNA binding / transcription factor | chr5:8986979-8987635 REVERSE	452.215	583.314
Brapa_ESTC046108	AT5G45140	Symbols: NRPC2 | NRPC2 (nuclear RNA polymerase C 2); DNA binding / DNA-directed RNA polymerase | chr5:18264643-18274940 REVERSE	1331.91	582.049
Brapa_ESTC009043	AT5G60890	Symbols: AtMYB34, ATR1, ATR | ATR1 (ALTERED TRYPTOPHAN REGULATION); DNA binding / kinase/ transcription factor | chr5:24512255-24513446 FORWARD	1061.55	580.969
Brapa_ESTC029638	AT4G37750	Symbols: DRG, CKC, CKC1, ANT | ANT (AINTEGUMENTA); DNA binding / transcription factor | chr4:17739776-17742183 FORWARD	314.619	580.607
Brapa_ESTC045391	AT5G06839	Symbols: | bZIP family transcription factor | chr5:2120912-2126218 FORWARD	433.31	580.26
Brapa_ESTC024455	AT2G47260	Symbols: WRKY23 | WRKY23 (WRKY DNA-binding protein 23); transcription factor | chr2:19412115-19413516 REVERSE	4666.14	580.146
Brapa_ESTC038286	AT1G18570	Symbols: AtMYB51, BW51A, BW51B, MYB51 | MYB51 (myb domain protein 51); DNA binding / transcription factor | chr1:6389758-6391019 FORWARD	1008.66	578.711
Brapa_ESTC037549	AT2G40740	Symbols: WRKY55 | WRKY55 (WRKY DNA-binding protein 55); transcription factor | chr2:17004255-17006354 FORWARD	532.509	576.437
Brapa_ESTC045071	AT4G36570	Symbols: | myb family transcription factor | chr4:17254665-17255053 FORWARD	220.273	576.165
Brapa_ESTC040075	AT1G26780	Symbols: AtMYB117, MYB117 | MYB117 (myb domain protein 117); transcription factor | chr1:9271020-9272115 FORWARD	418.376	574.749
Brapa_ESTC017099	AT2G17950	Symbols: PGA6, WUS | WUS (WUSCHEL); DNA binding / transcription factor | chr2:7816182-7817753 REVERSE	610.101	569.663
Brapa_ESTC045365	AT5G05330	| Symbols: | DNA binding | chr5:1577290-1578751 REVERSE	119.4	565.67
Brapa_ESTC042422	AT3G01600	Symbols: ANAC044 | ANAC044 (Arabidopsis NAC domain containing protein 44); transcription factor | chr3:229372-231112 FORWARD	478.76	565.174
Brapa_ESTC010194	AT2G47210	Symbols: | myb family transcription factor | chr2:19386109-19389274 FORWARD	542.289	563.87
Brapa_ESTC017879	AT1G13450	| Symbols: | DNA binding protein GT-1 | chr1:4612996-4615112 REVERSE	1277.34	563.611
Brapa_ESTC046791	AT5G15150	Symbols: HAT7, ATHB3, ATHB-3 | ATHB-3 (ARABIDOPSIS THALIANA HOMEOBOX 3); DNA binding / transcription factor | chr5:4913954-4915612 REVERSE	276.557	561.794
Brapa_ESTC037995	AT1G74660	Symbols: MIF1 | MIF1 (MINI ZINC FINGER 1); DNA binding / transcription factor | chr1:28051403-28051711 REVERSE	652.579	561.392
Brapa_ESTC004859	AT1G49010	Symbols: | myb family transcription factor | chr1:18136382-18137446 FORWARD	223.46	560.233
Brapa_ESTC023686	AT1G25340	Symbols: AtMYB116, MYB116 | MYB116 (myb domain protein 116); DNA binding / transcription factor | chr1:8885197-8886258 FORWARD	437.155	559.778
Brapa_ESTC000766	AT5G54310	Symbols: AGD5 | AGD5 (ARF-GAP DOMAIN 5); DNA binding | chr5:22074488-22078292 REVERSE	1768.74	559.452
Brapa_ESTC035183	AT4G17810	Symbols: | nucleic acid binding / transcription factor/ zinc ion binding | chr4:9906931-9907545 FORWARD	238.425	555.758
Brapa_ESTC005946	AT1G02340	Symbols: RSF1, FBI1, REP1, HFR1 | HFR1 (LONG HYPOCOTYL IN FAR-RED); DNA binding / transcription factor | chr1:465933-467685 REVERSE	432.375	555.287
Brapa_ESTC037216	AT3G61740	Symbols: | similar to PHD finger protein-related / SET domain-containing protein (TX4) [Arabidopsis thaliana] (TAIR:AT4G27910.1); similar to SDG29 (SET DOMAIN GROUP 29), DNA binding [Arabidopsis thaliana] (TAIR:AT5G53430.1); similar to Histone-lysine N-methyltransferase ATX4 (Trithorax-homolog protein 4) (TRX-homolog protein 4) (Trithorax 4) (Protein SET DOMAIN GROUP 16) (GB:Q9SUE7); similar to P…	708.29	555.062
Brapa_ESTC042116	AT2G46400	Symbols: ATWRKY46, WRKY46 | WRKY46 (WRKY DNA-binding protein 46); transcription factor | chr2:19050749-19051827 REVERSE	325.541	554.003
Brapa_ESTC003090	AT5G08130	Symbols: BIM1 | BIM1 (BES1-interacting Myc-like protein 1); DNA binding / transcription factor | chr5:2606656-2608653 REVERSE	457.371	553.262
Brapa_ESTC033904	AT4G09460	Symbols: AtMYB6, AtMYB8, ATMYB6 | ATMYB6 (myb domain protein 6, myb domain protein 8); DNA binding / transcription factor | chr4:5993016-5994035 FORWARD	773.244	552.317
Brapa_ESTC032163	AT5G25390	Symbols: SHN2 | SHN2 (SHINE2); DNA binding / transcription factor | chr5:8820640-8821744 FORWARD	497.875	550.701
Brapa_ESTC022792	AT5G22570	Symbols: ATWRKY38, WRKY38 | WRKY38 (WRKY DNA-binding protein 38); transcription factor | chr5:7495611-7496710 REVERSE	203.656	546.843
Brapa_ESTC031052	AT1G32330	Symbols: HSFA1D, ATHSFA1D | ATHSFA1D (Arabidopsis thaliana heat shock transcription factor A1D); DNA binding / transcription factor | chr1:11657245-11660214 REVERSE	692.789	543.279
Brapa_ESTC021240	AT4G30080	Symbols: ARF16 | ARF16 (AUXIN RESPONSE FACTOR 16); miRNA binding / transcription factor | chr4:14703375-14705570 REVERSE	1431.54	543.183
Brapa_ESTC039611	AT1G14440	Symbols: ATHB31 | ATHB31; transcription factor | chr1:4939071-4940009 REVERSE	562.901	541.969
Brapa_ESTC011180	AT5G45710	Symbols: HSFA4C, RHA1, AT-HSFA4C | AT-HSFA4C (Arabidopsis thaliana heat shock transcription factor A4C); DNA binding / transcription factor | chr5:18558803-18559933 FORWARD	1225.87	540.834
Brapa_ESTC010817	AT1G24267	Symbols: | similar to unknown protein [Arabidopsis thaliana] (TAIR:AT1G24265.2); similar to bZIP transcription factor bZIP56 [Glycine max] (GB:ABI34646.1); contains InterPro domain Protein of unknown function DUF1664; (InterPro:IPR012458) | chr1:8604440-8607230 REVERSE	3238.84	540.802
Brapa_ESTC030263	AT4G11070	Symbols: ATWRKY41, WRKY41 | WRKY41 (WRKY DNA-binding protein 41); transcription factor | chr4:6759299-6760759 FORWARD	279.584	538.956
Brapa_ESTC022020	AT3G09600	Symbols: | myb family transcription factor | chr3:2946464-2948275 FORWARD	258.734	537.156
Brapa_ESTC000681	AT2G24120	Symbols: PDE319, SCA3 | PDE319/SCA3 (PIGMENT DEFECTIVE 319, SCABRA 3); DNA binding / DNA-directed RNA polymerase | chr2:10256438-10261610 REVERSE	857.956	534.6
Brapa_ESTC034482	AT1G64100	| Symbols: | DNA binding / binding | chr1:23795248-23799226 FORWARD	526.599	533.769
Brapa_ESTC036646	AT4G24240	Symbols: ATWRKY7, WRKY7 | WRKY7 (WRKY DNA-binding protein 7); transcription factor | chr4:12571940-12573456 FORWARD	303.356	532.241
Brapa_ESTC000718	AT5G15650	Symbols: REVERSIBLY GLYCOSYLATED POLYPEPTIDE 2, RGP2 | RGP2 (Reversibly glycosylated polypeptide-3); DNA binding / alpha-1,4-glucan-protein synthase (UDP-forming) | chr5:5092206-5094096 FORWARD	951.377	529.79
Brapa_ESTC025857	AT2G16910	Symbols: AMS | AMS (ABORTED MICROSPORES); DNA binding / transcription factor | chr2:7338803-7341159 FORWARD	414.007	529.361
Brapa_ESTC034519	AT5G18270	Symbols: ANAC087 | ANAC087; transcription factor | chr5:6041243-6042745 REVERSE	1873.46	528.706
Brapa_ESTC040462	AT1G69600	Symbols: ATHB29, ZFHD1 | ATHB29/ZFHD1 (ZINC FINGER HOMEODOMAIN 1); DNA binding / transcription factor/ transcriptional activator | chr1:26186133-26186861 FORWARD	889.216	528.583
Brapa_ESTC023250	AT1G58110	Symbols: | DNA binding / transcription factor | chr1:21519584-21521039 REVERSE	877.102	525.916
Brapa_ESTC045475	AT5G10510	Symbols: AIL6 | AIL6 (AINTEGUMENTA-LIKE 6); DNA binding / transcription factor | chr5:3316037-3320009 FORWARD	736.774	524.14
Brapa_ESTC041146	AT2G20880	Symbols: | AP2 domain-containing transcription factor, putative | chr2:8993134-8994144 FORWARD	381.167	523.382
Brapa_ESTC045601	AT5G13910	Symbols: LEP | LEP (LEAFY PETIOLE); DNA binding / transcription factor | chr5:4482452-4483087 REVERSE	431.425	520.273
Brapa_ESTC018371	AT1G20980	Symbols: FBR6, SPL1R2, ATSPL14, SPL14 | SPL14 (SQUAMOSA PROMOTER BINDING PROTEIN-LIKE 14); DNA binding / transcription factor | chr1:7325031-7328922 FORWARD	1166.22	519.822
Brapa_ESTC029273	AT4G34430	Symbols: ATSWI3D, CHB3 | CHB3 (Arabidopsis thaliana switch 3D); DNA binding / transcription factor | chr4:16461073-16464997 FORWARD	658.674	517.065
Brapa_ESTC008281	AT1G69180	Symbols: CRC | CRC (CRABS CLAW); transcription factor | chr1:26011397-26012603 REVERSE	451.203	515.581
Brapa_ESTC040274	AT1G31240	Symbols: | similar to unknown protein [Arabidopsis thaliana] (TAIR:AT4G34340.1); similar to Bromodomain associated family protein, expressed [Oryza sativa (japonica cultivar-group)] (GB:ABA98992.1); similar to Os12g0574800 [Oryza sativa (japonica cultivar-group)] (GB:NP_001067103.1); similar to Os02g0699900 [Oryza sativa (japonica cultivar-group)] (GB:NP_001047835.1); contains InterPro domain Bro…	1329.31	515.288
Brapa_ESTC007120	AT4G16750	Symbols: | DRE-binding transcription factor, putative | chr4:9421143-9421682 REVERSE	382.822	515.164
Brapa_ESTC042124	AT2G46590	Symbols: DAG2 | DAG2 (DOF AFFECTING GERMINATION 2); DNA binding | chr2:19140238-19141976 FORWARD	231.604	514.271
Brapa_ESTC014766	AT4G17060	Symbols: | similar to transcription factor [Arabidopsis thaliana] (TAIR:AT2G44730.1); contains domain Origin of replication-binding domain, RBD-like (SSF55464) | chr4:9593740-9594672 REVERSE	720.383	513.166
Brapa_ESTC019135	AT5G18830	Symbols: SPL7 | SPL7 (SQUAMOSA PROMOTER BINDING PROTEIN-LIKE 7); DNA binding / transcription factor | chr5:6276118-6280229 FORWARD	1838.66	513.006
Brapa_ESTC030038	AT5G05770	Symbols: | homeobox-leucine zipper transcription factor family protein | chr5:1734488-1734856 FORWARD	405.342	511.92
Brapa_ESTC008164	AT4G38910	Symbols: BPC5, BBR/BPC5, ATBPC5 | ATBPC5/BBR/BPC5/BPC5 (BASIC PENTACYSTEINE 5); DNA binding / transcription factor | chr4:18144519-18146465 REVERSE	426.966	506.954
Brapa_ESTC028479	AT1G68550	Symbols: | AP2 domain-containing transcription factor, putative | chr1:25729473-25730447 REVERSE	1055.42	505.815
Brapa_ESTC009156	AT3G28920	Symbols: ATHB34 | ATHB34 (ARABIDOPSIS THALIANA HOMEOBOX PROTEIN 34); DNA binding / transcription factor | chr3:10941835-10942773 REVERSE	1907.38	503.581
Brapa_ESTC046852	AT5G53210	Symbols: | DNA binding / transcription factor | chr5:21603832-21606167 REVERSE	549.563	502.27
Brapa_ESTC014301	AT2G17040	Symbols: ANAC036 | ANAC036 (Arabidopsis NAC domain containing protein 36); transcription factor | chr2:7414205-7415202 FORWARD	178.066	501.416
Brapa_ESTC015009	AT3G10500	Symbols: ANAC053 | ANAC053 (Arabidopsis NAC domain containing protein 53); transcription factor | chr3:3271723-3273892 FORWARD	803.444	500.633
Brapa_ESTC030814	AT2G45280	Symbols: RAD51C, ATRAD51C | ATRAD51C (Arabidopsis thaliana Ras Associated with Diabetes protein 51C); ATP binding / damaged DNA binding | chr2:18677177-18679115 FORWARD	406.83	500.426
Brapa_ESTC025176	AT3G29035	Symbols: ANAC059, ATNAC3 | ANAC059/ATNAC3 (Arabidopsis NAC domain containing protein 59); protein heterodimerization/ transcription factor | chr3:11035076-11036243 FORWARD	749.09	500.416
Brapa_ESTC040454	AT1G69560	Symbols: AtMYB105, MYB105 | MYB105 (myb domain protein 105); DNA binding / transcription factor | chr1:26161418-26162569 FORWARD	457.043	500.163
Brapa_ESTC040003	AT1G22810	Symbols: | AP2 domain-containing transcription factor, putative | chr1:8074524-8074958 REVERSE	640.831	497.317
Brapa_ESTC025035	AT1G21450	Symbols: SCL1 | SCL1 (SCARECROW-LIKE 1); transcription factor | chr1:7509710-7511491 FORWARD	1882.13	496.616
Brapa_ESTC024391	AT4G17500	Symbols: ATERF-1 | ATERF-1 (ETHYLENE RESPONSIVE ELEMENT BINDING FACTOR 1); DNA binding / transcription factor/ transcriptional activator | chr4:9759658-9760224 FORWARD	558.268	496.304
Brapa_ESTC032282	AT3G22760	Symbols: SOL1 | SOL1 (TSO1-Like); transcription factor | chr3:8044629-8047388 FORWARD	440.126	495.247
Brapa_ESTC022437	AT1G75490	Symbols: | DNA binding / transcription factor | chr1:28339706-28340326 FORWARD	256.93	495.16
Brapa_ESTC012118	AT3G15500	Symbols: ANAC055, ATNAC3 | ATNAC3 (ARABIDOPSIS NAC DOMAIN CONTAINING PROTEIN 55); transcription factor | chr3:5234738-5235889 FORWARD	5060.87	494.679
Brapa_ESTC023776	AT4G23810	Symbols: ATWRKY53, WRKY53 | WRKY53 (WRKY DNA-binding protein 53); transcription factor | chr4:12392676-12393749 REVERSE	274.664	492.454
Brapa_ESTC023341	AT3G20310	Symbols: ATERF-7, ATERF7, ERF7 | ERF7 (ETHYLINE RESPONSE FACTOR7); DNA binding / protein binding / transcription factor/ transcriptional repressor | chr3:7085963-7086697 REVERSE	777.034	491.164
Brapa_ESTC032731	AT1G18860	Symbols: ATWRKY61, WRKY61 | WRKY61 (WRKY DNA-binding protein 61); transcription factor | chr1:6509485-6511200 FORWARD	512.079	490.902
Brapa_ESTC033715	AT2G36610	Symbols: ATHB22 | ATHB22 (ARABIDOPSIS THALIANA HOMEOBOX PROTEIN 22); DNA binding / transcription factor | chr2:15356406-15357167 FORWARD	466.772	490.131
Brapa_ESTC023111	AT4G27410	Symbols: ANAC072, RD26 | RD26 (RESPONSIVE TO DESSICATION 26); transcription factor | chr4:13707934-13709019 REVERSE	537.157	488.953
Brapa_ESTC023910	AT2G47210	Symbols: | myb family transcription factor | chr2:19386109-19389274 FORWARD	588.433	488.789
Brapa_ESTC020787	AT4G21750	Symbols: ATML1 | ATML1 (MERISTEM LAYER 1); DNA binding | chr4:11556977-11560255 FORWARD	336.442	487.639
Brapa_ESTC017845	AT1G58220	Symbols: | myb family transcription factor | chr1:21562053-21566334 REVERSE	1969.89	486.957
Brapa_ESTC030686	AT5G15150	Symbols: HAT7, ATHB3, ATHB-3 | ATHB-3 (ARABIDOPSIS THALIANA HOMEOBOX 3); DNA binding / transcription factor | chr5:4913954-4915612 REVERSE	1067.32	486.091
Brapa_ESTC043133	AT3G18010	| Symbols: | transcription factor | chr3:6161161-6163189 REVERSE	423.324	485.47
Brapa_ESTC040402	AT1G69120	Symbols: AP1 | AP1 (APETALA1); DNA binding / transcription factor | chr1:25986239-25989765 REVERSE	475.175	484.552
Brapa_ESTC014769	AT3G06490	Symbols: AtMYB108, BOS1, MYB108 | MYB108 (BOTRYTIS-SUSCEPTIBLE1, myb domain protein 108); DNA binding / transcription factor | chr3:2004304-2006364 FORWARD	615.747	483.573
Brapa_ESTC024992	AT5G19840	Symbols: | transcription factor jumonji (jmjC) domain-containing protein | chr5:6705374-6709384 FORWARD	687.93	483.459
Brapa_ESTC008651	AT1G69120	Symbols: AP1 | AP1 (APETALA1); DNA binding / transcription factor | chr1:25986239-25989765 REVERSE	444.188	483.357
Brapa_ESTC035862	AT1G10585	| Symbols: | transcription factor | chr1:3494116-3495105 REVERSE	220.93	482.43
Brapa_ESTC033400	AT5G04400	Symbols: ANAC077 | ANAC077 (Arabidopsis NAC domain containing protein 77); DNA binding | chr5:1241556-1243359 FORWARD	340.406	480.026
Brapa_ESTC030683	AT5G15130	Symbols: ATWRKY72, WRKY72 | WRKY72 (WRKY DNA-binding protein 72); transcription factor | chr5:4904429-4906882 FORWARD	360.335	479.683
Brapa_ESTC025157	AT3G10040	| Symbols: | transcription factor | chr3:3096585-3097880 REVERSE	397.689	478.741
Brapa_ESTC016003	AT3G07610	Symbols: | transcription factor jumonji (jmjC) domain-containing protein | chr3:2426154-2429364 FORWARD	1303.98	478.566
Brapa_ESTC016794	AT4G23550	Symbols: WRKY29 | WRKY29 (WRKY DNA-binding protein 29); transcription factor | chr4:12291841-12293098 FORWARD	431.542	477.971
Brapa_ESTC030581	AT1G06910	Symbols: TRFL7 | TRFL7 (TRF-LIKE 7); DNA binding / transcription factor | chr1:2121098-2122913 FORWARD	535.536	477.971
Brapa_ESTC006966	AT2G46830	Symbols: CCA1 | CCA1 (CIRCADIAN CLOCK ASSOCIATED 1); transcription factor | chr2:19253965-19255786 FORWARD	1768.62	475.991
Brapa_ESTC042639	AT3G05690	Symbols: UNE8, ATHAP2B, HAP2, HAP2B | HAP2B (Heme activator protein (yeast) homolog 2B, unfertilized embryo sac 8); transcription factor | chr3:1676928-1678330 REVERSE	270.802	475.72
Brapa_ESTC034393	AT2G28610	Symbols: PRS | PRS (PRESSED FLOWER); transcription factor | chr2:12269192-12270363 FORWARD	372.892	474.759
Brapa_ESTC034060	AT5G22750	Symbols: RAD5 | RAD5; ATP binding / DNA binding / helicase/ protein binding / zinc ion binding | chr5:7565377-7570874 REVERSE	338.38	472.508
Brapa_ESTC034510	AT5G18450	Symbols: | AP2 domain-containing transcription factor, putative | chr5:6116099-6117022 REVERSE	392.071	471.541
Brapa_ESTC016343	AT2G16400	Symbols: BLH7 | BLH7 (BELL1-LIKE HOMEODOMAIN 7); DNA binding / transcription factor | chr2:7108572-7110282 REVERSE	937.25	470.709
Brapa_ESTC026383	AT5G47390	Symbols: | myb family transcription factor | chr5:19244228-19245773 FORWARD	1573.65	469.204
Brapa_ESTC030191	AT4G37730	Symbols: ATBZIP7 | bZIP transcription factor family protein | chr4:17723794-17724711 FORWARD	1021.2	468.491
Brapa_ESTC009848	AT2G42830	Symbols: AGL5, SHP2 | SHP2 (SHATTERPROOF 2); transcription factor | chr2:17827679-17830883 FORWARD	496.099	466.677
Brapa_ESTC038587	AT4G28530	Symbols: ANAC074 | ANAC074 (Arabidopsis NAC domain containing protein 74); transcription factor | chr4:14090731-14094609 REVERSE	374.372	466.081
Brapa_ESTC028132	AT3G18035	| Symbols: HON4 | HON4; DNA binding | chr3:6169390-6171564 REVERSE	643.758	464.573
Brapa_ESTC023196	AT2G47210	Symbols: | myb family transcription factor | chr2:19386109-19389274 FORWARD	311.044	463.79
Brapa_ESTC018520	AT1G77850	Symbols: ARF17 | ARF17 (AUXIN RESPONSE FACTOR 17); transcription factor | chr1:29277299-29280087 FORWARD	591.515	462.736
Brapa_ESTC036582	AT4G29940	Symbols: PRHA | PRHA (PATHOGENESIS RELATED HOMEODOMAIN PROTEIN A); transcription factor | chr4:14648352-14652716 REVERSE	260.997	462.658
Brapa_ESTC024108	AT2G37650	Symbols: | scarecrow-like transcription factor 9 (SCL9) | chr2:15799701-15801857 FORWARD	521.917	461.129
Brapa_ESTC006805	AT2G37550	Symbols: AGD7, ASP1 | ASP1 (PDE1 SUPPRESSOR 1); DNA binding | chr2:15762622-15764534 REVERSE	524.266	461.046
Brapa_ESTC042136	AT2G46970	Symbols: PIL1 | PIL1 (PHYTOCHROME INTERACTING FACTOR 3-LIKE 1); transcription factor | chr2:19302686-19304747 REVERSE	301.118	460.877
Brapa_ESTC022812	AT3G06590	Symbols: | similar to transcription factor [Arabidopsis thaliana] (TAIR:AT3G17100.2); similar to Helix-loop-helix DNA-binding [Medicago truncatula] (GB:ABE82804.1); contains InterPro domain Helix-loop-helix DNA-binding; (InterPro:IPR011598); contains InterPro domain Basic helix-loop-helix dimerisation region bHLH; (InterPro:IPR001092) | chr3:2054653-2055318 REVERSE	874.991	460.389
Brapa_ESTC039675	AT3G01460	Symbols: MBD9 | MBD9 (METHYL-CPG-BINDING DOMAIN 9); DNA binding | chr3:173323-182045 FORWARD	613.748	460.083
Brapa_ESTC024503	AT5G10510	Symbols: AIL6 | AIL6 (AINTEGUMENTA-LIKE 6); DNA binding / transcription factor | chr5:3316037-3320009 FORWARD	292.286	459.649
Brapa_ESTC033959	AT5G43270	Symbols: SPL2 | SPL2 (SQUAMOSA PROMOTER BINDING PROTEIN-LIKE 2); DNA binding / transcription factor | chr5:17377755-17379371 REVERSE	597.821	459.276
Brapa_ESTC005480	AT3G52250	Symbols: | myb family transcription factor | chr3:19387607-19394078 FORWARD	626.432	458.955
Brapa_ESTC024467	AT4G31550	Symbols: ATWRKY11, WRKY11 | WRKY11 (WRKY DNA-binding protein 11); transcription factor | chr4:15290071-15291464 REVERSE	5082.1	457.136
Brapa_ESTC040636	AT1G77950	| Symbols: | transcription factor | chr1:29311923-29314561 FORWARD	308.502	453.925
Brapa_ESTC037678	AT1G09060	| Symbols: | transcription factor | chr1:2921238-2925257 REVERSE	651.872	451.349
Brapa_ESTC030533	AT1G66170	Symbols: MMD1 | MMD1 (MALE MEIOCYTE DEATH 1); DNA binding | chr1:24642456-24644885 REVERSE	250.948	451.324
Brapa_ESTC003213	AT1G19210	Symbols: | AP2 domain-containing transcription factor, putative | chr1:6626964-6627521 REVERSE	296.566	450.286
Brapa_ESTC024923	AT3G06490	Symbols: AtMYB108, BOS1, MYB108 | MYB108 (BOTRYTIS-SUSCEPTIBLE1, myb domain protein 108); DNA binding / transcription factor | chr3:2004304-2006364 FORWARD	590.683	449.189
Brapa_ESTC008890	AT2G46830	Symbols: CCA1 | CCA1 (CIRCADIAN CLOCK ASSOCIATED 1); transcription factor | chr2:19253074-19255786 FORWARD	4510.43	448.74
Brapa_ESTC044588	AT4G28110	Symbols: AtMYB41 | AtMYB41 (myb domain protein 41); DNA binding / transcription factor | chr4:13968172-13969390 REVERSE	420.897	447.526
Brapa_ESTC016317	AT1G30810	Symbols: | transcription factor jumonji (jmj) family protein / zinc finger (C5HC2 type) family protein | chr1:10938121-10941486 REVERSE	649.638	447.365
Brapa_ESTC020643	AT3G61150	Symbols: HDG1 | HDG1 (HOMEODOMAIN GLABROUS1); DNA binding / transcription factor | chr3:22641744-22645850 FORWARD	1154.67	447.22
Brapa_ESTC025229	AT1G58220	Symbols: | myb family transcription factor | chr1:21562053-21566334 REVERSE	992.703	442.114
Brapa_ESTC005673	AT4G37790	Symbols: HAT22 | HAT22 (homeobox-leucine zipper protein 22); transcription factor | chr4:17768235-17769266 FORWARD	421.889	440.99
Brapa_ESTC025593	AT1G30490	Symbols: ATHB9 | PHV (PHAVOLUTA); DNA binding / transcription factor | chr1:10796310-10800726 REVERSE	798.375	440.907
Brapa_ESTC043402	AT3G50060	Symbols: | myb family transcription factor | chr3:18569129-18570034 REVERSE	290.754	438.953
Brapa_ESTC037250	AT2G37025	Symbols: TRFL8 | TRFL8 (TRF-LIKE 8); DNA binding | chr2:15557121-15559036 FORWARD	251.609	438.945
Brapa_ESTC011690	AT3G59060	Symbols: PIF5, PIL6 | PIL6 (PHYTOCHROME-INTERACTING FACTOR 5); DNA binding / transcription factor | chr3:21839166-21840872 REVERSE	631.181	438.675
Brapa_ESTC011839	AT4G27410	Symbols: ANAC072, RD26 | RD26 (RESPONSIVE TO DESSICATION 26); transcription factor | chr4:13707934-13709019 REVERSE	689.99	438.603
Brapa_ESTC038671	AT3G27810	Symbols: AtMYB21, AtMYB3, MYB21, ATMYB21 | ATMYB21 (MYB DOMAIN PROTEIN 21); DNA binding / transcription factor | chr3:10308833-10311330 FORWARD	364.495	438.089
Brapa_ESTC008493	AT2G31070	Symbols: TCP10 | TCP10 (TCP domain protein 10); transcription factor | chr2:13228061-13229146 REVERSE	926.799	435.942
Brapa_ESTC011211	AT1G49010	Symbols: | myb family transcription factor | chr1:18136382-18137446 FORWARD	203.738	434.077
Brapa_ESTC037299	AT2G03060	Symbols: | similar to AGL102, DNA binding / transcription factor [Arabidopsis thaliana] (TAIR:AT1G18750.1); similar to SRF-type transcription factor family protein [Oryza sativa (japonica cultivar-group)] (GB:ABA95182.1); contains InterPro domain transcription factor, MADS-box; (InterPro:IPR002100) | chr2:901613-903568 FORWARD	362.454	433.765
Brapa_ESTC032637	AT3G17100	| Symbols: | transcription factor | chr3:5831558-5832250 FORWARD	174.973	433.264
Brapa_ESTC021072	AT5G43270	Symbols: SPL2 | SPL2 (SQUAMOSA PROMOTER BINDING PROTEIN-LIKE 2); DNA binding / transcription factor | chr5:17377755-17379371 REVERSE	855.191	431.253
Brapa_ESTC034424	AT5G24110	Symbols: ATWRKY30, WRKY30 | WRKY30 (WRKY DNA-binding protein 30); transcription factor | chr5:8153419-8154636 REVERSE	278.547	427.715
Brapa_ESTC003245	AT4G17500	Symbols: ATERF-1 | ATERF-1 (ETHYLENE RESPONSIVE ELEMENT BINDING FACTOR 1); DNA binding / transcription factor/ transcriptional activator | chr4:9759658-9760224 FORWARD	455.171	426.797
Brapa_ESTC020925	AT5G09460	Symbols: | transcription factor/ transcription regulator | chr5:2944438-2945418 REVERSE	460.43	426.656
Brapa_ESTC008161	AT3G24320	Symbols: MSH1, CHM1, ATMSH1, CHM | CHM (CHLOROPLAST MUTATOR); ATP binding / damaged DNA binding | chr3:8823236-8829578 REVERSE	535.988	426.656
Brapa_ESTC032154	AT5G25790	| Symbols: | transcription factor | chr5:8977236-8979184 REVERSE	578.674	426.102
Brapa_ESTC005523	AT5G51990	Symbols: CBF4, DREB1D | CBF4/DREB1D (C- REPEAT-BINDING FACTOR 4); DNA binding / transcription factor/ transcriptional activator | chr5:21134339-21135013 REVERSE	1150.88	425.998
Brapa_ESTC037885	AT2G20400	Symbols: | myb family transcription factor | chr2:8806705-8808702 FORWARD	658.138	425.652
Brapa_ESTC034908	AT1G74930	Symbols: | AP2 domain-containing transcription factor, putative | chr1:28147900-28148487 FORWARD	619.271	425.635
Brapa_ESTC027917	AT5G39860	Symbols: PRE1 | PRE1 (PACLOBUTRAZOL RESISTANCE1); DNA binding / transcription factor | chr5:15974917-15975531 FORWARD	233.054	425.589
Brapa_ESTC046552	AT5G62380	Symbols: ANAC101, VND6 | VND6 (VASCULAR-RELATED NAC-DOMAIN 6); transcription factor | chr5:25067910-25069084 FORWARD	460.636	425.352
Brapa_ESTC036534	AT3G14980	Symbols: | PHD finger transcription factor, putative | chr3:5039938-5044818 REVERSE	334.488	424.89
Brapa_ESTC031160	AT3G15510	Symbols: ANAC056, ATNAC2 | ATNAC2 (Arabidopsis thaliana NAC domain containing protein 2); transcription factor | chr3:5243703-5245044 FORWARD	933.417	424.685
Brapa_ESTC021477	AT3G45900	Symbols: | similar to unknown protein [Arabidopsis thaliana] (TAIR:AT5G53020.1); similar to Os03g0853600 [Oryza sativa (japonica cultivar-group)] (GB:NP_001051930.1); similar to putative 200 kDa antigen p200 [Oryza sativa (japonica cultivar-group)] (GB:BAD88062.1); contains domain transcription factor X1-LIKE (PTHR21596:SF1); contains domain RIBONUCLEASE P PROTEIN SUBUNIT P38-RELATED (PTHR21596);…	202.685	424.288
Brapa_ESTC045275	AT5G03680	Symbols: PTL | PTL (PETAL LOSS); transcription factor | chr5:957857-960759 FORWARD	359.341	424.236
Brapa_ESTC020033	AT5G12870	Symbols: AtMYB46 | AtMYB46 (myb domain protein 46); DNA binding / transcription factor | chr5:4062942-4064942 REVERSE	357.671	423.027
Brapa_ESTC040768	AT1G75430	| Symbols: | transcription factor | chr1:28311782-28313178 REVERSE	246.715	422.681
Brapa_ESTC007967	AT4G36920	Symbols: FLO2, FL1, AP2 | AP2 (APETALA 2); transcription factor | chr4:17400995-17403137 FORWARD	397.018	422.565
Brapa_ESTC047412	AT3G54810	Symbols: BME3-ZF, BME3 | BME3/BME3-ZF (BLUE MICROPLYLAR END3); transcription factor | chr3:20307935-20309214 FORWARD	1133.99	422.195
Brapa_ESTC024831	AT5G49520	Symbols: ATWRKY48, WRKY48 | WRKY48 (WRKY DNA-binding protein 48); transcription factor | chr5:20108116-20110093 FORWARD	5891.12	420.184
Brapa_ESTC017830	AT5G61430	Symbols: ANAC100, ATNAC5 | ANAC100/ATNAC5 (Arabidopsis NAC domain containing protein 100); transcription factor | chr5:24718554-24719779 REVERSE	731.269	419.751
Brapa_ESTC030226	AT4G29080	Symbols: IAA27, PAP2 | PAP2 (PHYTOCHROME-ASSOCIATED PROTEIN 2); transcription factor | chr4:14323671-14325219 REVERSE	666.832	419.669
Brapa_ESTC013603	AT3G25730	Symbols: | AP2 domain-containing transcription factor, putative | chr3:9397742-9398743 FORWARD	784.095	419.58
Brapa_ESTC044431	AT4G23550	Symbols: WRKY29 | WRKY29 (WRKY DNA-binding protein 29); transcription factor | chr4:12291841-12293098 FORWARD	211.98	419.106
Brapa_ESTC022931	AT3G25790	Symbols: | myb family transcription factor | chr3:9414433-9416188 FORWARD	421.115	417.963
Brapa_ESTC028723	AT3G28917	Symbols: MIF2 | MIF2 (MINI ZINC FINGER 2); DNA binding | chr3:10926251-10926553 FORWARD	509.149	417.449
Brapa_ESTC035142	AT4G32040	Symbols: KNAT5 | KNAT5 (KNOTTED1-LIKE HOMEOBOX GENE 5); transcription factor | chr4:15494133-15496015 FORWARD	198.503	416.169
Brapa_ESTC023295	AT3G15500	Symbols: ANAC055, ATNAC3 | ATNAC3 (ARABIDOPSIS NAC DOMAIN CONTAINING PROTEIN 55); transcription factor | chr3:5234738-5235889 FORWARD	1004.4	415.126
Brapa_ESTC024192	AT5G49620	Symbols: AtMYB78 | AtMYB78 (myb domain protein 78); DNA binding / transcription factor | chr5:20154717-20156610 REVERSE	391.827	413.62
Brapa_ESTC042264	AT2G13570	Symbols: | CCAAT-box binding transcription factor, putative | chr2:5662924-5663571 REVERSE	422.117	413.308
Brapa_ESTC039504	AT1G12610	Symbols: DDF1 | DDF1 (DWARF AND DELAYED FLOWERING 1); DNA binding / transcription factor | chr1:4290203-4290832 REVERSE	900.361	413.075
Brapa_ESTC040802	AT1G80730	Symbols: ATZFP1, ZFP1 | ZFP1 (ARABIDOPSIS THALIANA ZINC-FINGER PROTEIN 1); nucleic acid binding / transcription factor/ zinc ion binding | chr1:30344385-30345071 REVERSE	347.566	412.208
Brapa_ESTC033418	AT3G09360	Symbols: | RNA polymerase II transcription factor | chr3:2873802-2878438 FORWARD	606.702	412.071
Brapa_ESTC010384	AT2G35210	Symbols: RPA, AGD10, MEE28 | AGD10/MEE28/RPA (ROOT AND POLLEN ARFGAP, maternal effect embryo arrest 28); DNA binding | chr2:14843285-14845025 FORWARD	376.532	411.051
Brapa_ESTC027639	AT1G63650	Symbols: EGL1, ATMYC-2, EGL3 | EGL3 (ENHANCER OF GLABRA3); DNA binding | chr1:23603472-23606397 FORWARD	442.045	409.435
Brapa_ESTC050094	AT1G60850	Symbols: AAC42, ATRPAC42 | ATRPAC42 (Arabidopsis thaliana RNA polymerase I subunit 42); DNA binding / DNA-directed RNA polymerase | chr1:22401743-22403820 REVERSE	313.57	408.842
Brapa_ESTC027778	AT3G04730	Symbols: IAA16 | IAA16 (indoleacetic acid-induced protein 16); transcription factor | chr3:1288999-1290421 REVERSE	444.07	408.771
Brapa_ESTC024954	AT3G19580	Symbols: AZF2 | AZF2 (ARABIDOPSIS ZINC-FINGER PROTEIN 2); nucleic acid binding / transcription factor/ zinc ion binding | chr3:6803299-6804120 REVERSE	1094.33	405.218
Brapa_ESTC007353	AT1G05380	| Symbols: | DNA binding | chr1:1577230-1582189 FORWARD	658.266	404.808
Brapa_ESTC023600	AT4G36920	Symbols: FLO2, FL1, AP2 | AP2 (APETALA 2); transcription factor | chr4:17400995-17403137 FORWARD	395.218	403.786
Brapa_ESTC032430	AT2G26960	Symbols: AtMYB81 | AtMYB81 (myb domain protein 81); DNA binding / transcription factor | chr2:11513143-11514503 REVERSE	360.546	402.715
Brapa_ESTC004994	AT2G40260	Symbols: | myb family transcription factor | chr2:16823896-16825551 REVERSE	153.263	399.271
Brapa_ESTC019684	AT5G28650	Symbols: ATWRKY74, WRKY74 | WRKY74 (WRKY DNA-binding protein 74); transcription factor | chr5:10677794-10678949 REVERSE	336.691	399.088
Brapa_ESTC032886	AT2G34210	Symbols: | KOW domain-containing transcription factor family protein | chr2:14453017-14457601 FORWARD	277.443	394.901
Brapa_ESTC018211	AT4G32700	Symbols: | ATP binding / ATP-dependent helicase/ DNA binding / DNA-directed DNA polymerase/ helicase/ nucleic acid binding | chr4:15767445-15779190 FORWARD	339.039	393.404
Brapa_ESTC008506	AT4G18960	Symbols: AG | AG (AGAMOUS); transcription factor | chr4:10383928-10388283 FORWARD	365.556	392.971
Brapa_ESTC045429	AT5G06250	| Symbols: | transcription factor | chr5:1892715-1894059 REVERSE	373.75	392.716
Brapa_ESTC044866	AT4G33280	Symbols: | DNA binding / transcription factor | chr4:16047361-16049314 REVERSE	424.188	392.2
Brapa_ESTC027459	AT2G42780	Symbols: | similar to Os08g0169600 [Oryza sativa (japonica cultivar-group)] (GB:NP_001061087.1); similar to predicted protein [Coprinopsis cinerea okayama7#130] (GB:EAU88783.1); contains InterPro domain RNA polymerase II transcription factor SIII subunit A; (InterPro:IPR010684) | chr2:17808114-17809723 FORWARD	389.905	391.635
Brapa_ESTC024819	AT4G32880	Symbols: ATHB8, ATHB-8 | ATHB-8 (HOMEOBOX GENE 8); DNA binding / transcription factor | chr4:15863591-15867826 REVERSE	609.668	391.247
Brapa_ESTC036883	AT3G11440	Symbols: AtMYB65, MYB65, ATMYB65 | ATMYB65 (myb domain protein 65); DNA binding / transcription factor | chr3:3603062-3604935 FORWARD	292.384	390.605
Brapa_ESTC046722	AT5G67450	Symbols: AZF1 | AZF1 (ARABIDOPSIS ZINC-FINGER PROTEIN 1); nucleic acid binding / transcription factor/ zinc ion binding | chr5:26936368-26937105 REVERSE	356.139	389.939
Brapa_ESTC041409	AT4G00260	Symbols: MEE45 | MEE45 (maternal effect embryo arrest 45); DNA binding / transcription factor | chr4:114971-117051 FORWARD	329.066	389.682
Brapa_ESTC017401	AT4G37750	Symbols: DRG, CKC, CKC1, ANT | ANT (AINTEGUMENTA); DNA binding / transcription factor | chr4:17739776-17742183 FORWARD	253.026	389.358
Brapa_ESTC045976	AT5G41100	| Symbols: | DNA binding | chr5:16464657-16467914 FORWARD	520.29	388.971
Brapa_ESTC013883	AT1G27730	Symbols: ZAT10, STZ | STZ (SALT TOLERANCE ZINC FINGER); nucleic acid binding / transcription factor/ zinc ion binding | chr1:9648289-9648972 REVERSE	713.997	388.315
Brapa_ESTC024350	AT5G05410	Symbols: DREB2, DREB2A | DREB2A (DRE-BINDING PROTEIN 2A); DNA binding / transcription factor/ transcriptional activator | chr5:1602651-1603658 FORWARD	1169.64	386.01
Brapa_ESTC035836	AT5G23650	Symbols: | myb family transcription factor | chr5:7969815-7971022 FORWARD	391.028	385.624
Brapa_ESTC009620	AT5G06800	Symbols: | myb family transcription factor | chr5:2103375-2105681 FORWARD	290.615	385.497
Brapa_ESTC025096	AT3G15500	Symbols: ANAC055, ATNAC3 | ATNAC3 (ARABIDOPSIS NAC DOMAIN CONTAINING PROTEIN 55); transcription factor | chr3:5234738-5235889 FORWARD	1584.01	384.34
Brapa_ESTC045597	AT5G13820	Symbols: ATBP-1, ATBP1, ATTBP1, HPPBF-1, TBP1 | TBP1 (TELOMERIC DNA BINDING PROTEIN 1); DNA binding | chr5:4461697-4464358 FORWARD	298.132	383.952
Brapa_ESTC023766	AT1G34190	Symbols: ANAC017 | ANAC017 (Arabidopsis NAC domain containing protein 17); transcription factor | chr1:12451707-12453892 FORWARD	564.216	383.879
Brapa_ESTC025128	AT3G48160	Symbols: E2L3, E2FE, DEL1 | DEL1 (DP-E2F-like 1); transcription factor | chr3:17794626-17796831 FORWARD	244.372	383.563
Brapa_ESTC015971	AT1G12260	Symbols: EMB2749, ANAC007, VND4 | VND4 (VASCULAR RELATED NAC-DOMAIN PROTEIN 4); transcription factor | chr1:4163056-4164484 REVERSE	391.138	383.022
Brapa_ESTC040886	AT1G51120	Symbols: | AP2 domain-containing transcription factor, putative | chr1:18941759-18942817 FORWARD	268.713	380.097
Brapa_ESTC032878	AT2G33880	Symbols: HB-3, STIP, WOX9 | WOX9 (STIMPY); transcription factor | chr2:14348718-14350676 REVERSE	335.281	378.296
Brapa_ESTC009273	AT3G27810	Symbols: AtMYB21, AtMYB3, MYB21, ATMYB21 | ATMYB21 (MYB DOMAIN PROTEIN 21); DNA binding / transcription factor | chr3:10308833-10311330 FORWARD	362.166	376.99
Brapa_ESTC017726	AT3G23780	Symbols: DRD2, NRPD2, NRPD2a | NRPD2a (NUCLEAR RNA POLYMERASE D 2A); DNA binding / DNA-directed RNA polymerase | chr3:8567978-8573826 REVERSE	614.849	375.797
Brapa_ESTC020373	AT3G24120	Symbols: | myb family transcription factor | chr3:8705932-8708155 REVERSE	404.897	375.626
Brapa_ESTC025634	AT4G32040	Symbols: KNAT5 | KNAT5 (KNOTTED1-LIKE HOMEOBOX GENE 5); transcription factor | chr4:15494133-15496015 FORWARD	57.5236	375.057
Brapa_ESTC026539	AT1G09530	Symbols: PIF3, POC1, PAP3 | PIF3 (PHYTOCHROME INTERACTING FACTOR 3); DNA binding / transcription factor/ transcription regulator | chr1:3077218-3079369 FORWARD	973.618	371.484
Brapa_ESTC013607	AT1G49950	Symbols: ATTRB1, TRB1 | ATTRB1/TRB1 (TELOMERE REPEAT BINDING FACTOR 1); DNA binding / transcription factor | chr1:18498107-18500381 REVERSE	519.306	371.054
Brapa_ESTC017431	AT1G19000	Symbols: | myb family transcription factor | chr1:6561326-6562675 REVERSE	537.564	370.602
Brapa_ESTC033158	AT2G01500	Symbols: WOX6, PFS2, HOS9 | HOS9/PFS2 (HIGH EXPRESSION OF OSMOTICALLY RESPONSIVE GENE 9); transcription factor | chr2:224469-225996 REVERSE	268.237	370.138
Brapa_ESTC037208	AT3G61630	Symbols: CRF6 | CRF6 (CYTOKININ RESPONSE FACTOR 6); DNA binding / transcription factor | chr3:22816249-22817196 FORWARD	380.754	369.828
Brapa_ESTC029791	AT5G51870	Symbols: AGL71 | AGL71; transcription factor | chr5:21102861-21105149 REVERSE	618.727	369.682
Brapa_ESTC025442	AT5G15310	Symbols: AtMYB16, AtMIXTA | AtMIXTA/AtMYB16 (myb domain protein 16); DNA binding / transcription factor | chr5:4974897-4976109 FORWARD	255.192	368.627
Brapa_ESTC031079	AT3G02310	Symbols: AGL4, SEP2 | SEP2 (SEPALLATA2); DNA binding / transcription factor | chr3:464561-466694 REVERSE	356.13	367.951
Brapa_ESTC046316	AT5G55760	Symbols: SRT1 | SRT1 (SIRTUIN 1); DNA binding | chr5:22584508-22587942 FORWARD	174.562	367.679
Brapa_ESTC019977	AT5G15150	Symbols: HAT7, ATHB3, ATHB-3 | ATHB-3 (ARABIDOPSIS THALIANA HOMEOBOX 3); DNA binding / transcription factor | chr5:4913954-4915612 REVERSE	694.149	367.211
Brapa_ESTC039428	AT1G08320	| Symbols: | DNA binding | chr1:2622110-2627448 REVERSE	332.345	366.083
Brapa_ESTC037115	AT3G28470	Symbols: AtMYB35 | AtMYB35 (myb domain protein 35); DNA binding / transcription factor | chr3:10675816-10676961 REVERSE	278.323	366.068
Brapa_ESTC004389	AT1G25280	Symbols: AtTLP10 | AtTLP10 (TUBBY LIKE PROTEIN 10); phosphoric diester hydrolase/ transcription factor | chr1:8864948-8866595 FORWARD	1521.21	364.723
Brapa_ESTC019307	AT3G52270	Symbols: | ATP binding / RNA polymerase II transcription factor | chr3:19398158-19399865 REVERSE	291.599	364.1
Brapa_ESTC016404	AT2G46590	Symbols: DAG2 | DAG2 (DOF AFFECTING GERMINATION 2); DNA binding | chr2:19140238-19141976 FORWARD	226.479	361.969
Brapa_ESTC006286	AT2G41940	Symbols: ZFP8 | ZFP8 (ZINC FINGER PROTEIN 8); nucleic acid binding / transcription factor/ zinc ion binding | chr2:17514634-17515407 FORWARD	321.646	361.072
Brapa_ESTC048372	AT5G20240	Symbols: PI | PI (PISTILLATA); DNA binding / transcription factor | chr5:6829205-6831210 FORWARD	354.113	360.36
Brapa_ESTC011079	AT1G67590	| Symbols: | DNA binding | chr1:25336918-25338135 REVERSE	408.303	360.293
Brapa_ESTC043068	AT3G16350	Symbols: | myb family transcription factor | chr3:5547834-5549403 FORWARD	550.176	358.453
Brapa_ESTC028515	AT4G23550	Symbols: WRKY29 | WRKY29 (WRKY DNA-binding protein 29); transcription factor | chr4:12291841-12293098 FORWARD	281.656	357.612
Brapa_ESTC044298	AT4G22070	Symbols: ATWRKY31, WRKY31 | WRKY31 (WRKY DNA-binding protein 31); transcription factor | chr4:11691393-11694246 REVERSE	139.193	357.409
Brapa_ESTC046014	AT5G46350	Symbols: ATWRKY8, WRKY8 | WRKY8 (WRKY DNA-binding protein 8); transcription factor | chr5:18818630-18821128 REVERSE	375.231	357.234
Brapa_ESTC022168	AT3G06380	Symbols: ATTLP9 | ATTLP9/AtTLP9 (TUBBY LIKE PROTEIN 9, TUBBY-LIKE PROTEIN 9); phosphoric diester hydrolase/ protein binding / transcription factor | chr3:1936390-1938034 FORWARD	650.641	355.979
Brapa_ESTC048305	AT2G23380	Symbols: ICU1, CLF | CLF (CURLY LEAF); transcription factor | chr2:9962650-9967197 FORWARD	205.638	353.788
Brapa_ESTC027865	AT3G24120	Symbols: | myb family transcription factor | chr3:8705932-8708155 REVERSE	675.653	353.18
Brapa_ESTC002747	AT3G10040	| Symbols: | transcription factor | chr3:3096585-3097880 REVERSE	237.336	352.962
Brapa_ESTC016564	AT4G14920	Symbols: | PHD finger transcription factor, putative | chr4:8531153-8535838 REVERSE	705.058	351.95
Brapa_ESTC024204	AT3G20740	Symbols: FIS3, FIE1, FIE | FIE (FERTILIZATION-INDEPENDENT ENDOSPERM 1); nucleotide binding / transcription factor | chr3:7249070-7252260 REVERSE	113.735	351.801
Brapa_ESTC015150	AT3G16350	Symbols: | myb family transcription factor | chr3:5547834-5549403 FORWARD	897.415	351.696
Brapa_ESTC018898	AT1G20980	Symbols: FBR6, SPL1R2, ATSPL14, SPL14 | SPL14 (SQUAMOSA PROMOTER BINDING PROTEIN-LIKE 14); DNA binding / transcription factor | chr1:7325031-7328922 FORWARD	472.17	350.505
Brapa_ESTC001959	AT3G50260	Symbols: CEJ1, ATERF#011 | ATERF#011/CEJ1 (COOPERATIVELY REGULATED BY ETHYLENE AND JASMONATE 1); DNA binding / transcription factor | chr3:18645669-18646130 FORWARD	327.567	349.833
Brapa_ESTC048594	AT2G02070	Symbols: ATIDD5 | ATIDD5 (ARABIDOPSIS THALIANA INDETERMINATE(ID)-DOMAIN 5); nucleic acid binding / transcription factor/ zinc ion binding | chr2:505522-509153 FORWARD	113.386	348.859
Brapa_ESTC046151	AT5G46690	Symbols: BHLH071 | BHLH071 (BETA HLH PROTEIN 71); DNA binding / transcription factor | chr5:18962866-18964661 FORWARD	622.314	347.565
Brapa_ESTC015886	AT3G54280	Symbols: | ATP binding / DNA binding / helicase | chr3:20103339-20114785 FORWARD	396.318	346.503
Brapa_ESTC034399	AT2G28550	Symbols: RAP2.7, TOE1 | TOE1 (TARGET OF EAT1 1); DNA binding / transcription factor | chr2:12233521-12235328 REVERSE	239.994	345.433
Brapa_ESTC042873	AT3G12720	Symbols: AtY53, AtMYB67 | AtMYB67/AtY53 (myb domain protein 67); DNA binding / transcription factor | chr3:4043414-4044529 REVERSE	162.002	344.83
Brapa_ESTC038631	AT2G36960	Symbols: TKI1 | TKI1 (TSL-KINASE INTERACTING PROTEIN 1); DNA binding / transcription factor | chr2:15530631-15534324 FORWARD	551.631	343.871
Brapa_ESTC005167	AT3G23250	Symbols: MYB15, AtY19, AtMYB15 | AtMYB15/AtY19/MYB15 (myb domain protein 15); DNA binding | chr3:8309749-8310631 FORWARD	311.419	341.812
Brapa_ESTC026839	AT4G17020	Symbols: | transcription factor-related | chr4:9578171-9581101 REVERSE	191.506	341.004
Brapa_ESTC027706	AT1G12260	Symbols: EMB2749, ANAC007, VND4 | VND4 (VASCULAR RELATED NAC-DOMAIN PROTEIN 4); transcription factor | chr1:4163056-4164484 REVERSE	316.9	339.803
Brapa_ESTC041952	AT2G42830	Symbols: AGL5, SHP2 | SHP2 (SHATTERPROOF 2); transcription factor | chr2:17827679-17830883 FORWARD	208.156	339.656
Brapa_ESTC045239	AT2G21450	Symbols: CHR34 | CHR34 (chromatin remodeling 34); ATP binding / DNA binding / helicase | chr2:9186702-9189436 REVERSE	532.77	336.204
Brapa_ESTC041646	AT2G33710	Symbols: | AP2 domain-containing transcription factor family protein | chr2:14266347-14267728 REVERSE	311.928	335.916
Brapa_ESTC019561	AT5G44750	Symbols: REV1 | REV1 (Reversionless 1); damaged DNA binding / magnesium ion binding / nucleotidyltransferase | chr5:18069896-18076808 FORWARD	296.91	334.034
Brapa_ESTC033455	AT1G71692	Symbols: AGL12 | AGL12 (AGAMOUS-LIKE 12); transcription factor | chr1:26956565-26958601 REVERSE	148.306	333.914
Brapa_ESTC018351	AT4G28500	Symbols: ANAC073 | ANAC073 (Arabidopsis NAC domain containing protein 73); transcription factor | chr4:14083020-14084272 FORWARD	368.422	333.799
Brapa_ESTC044721	AT4G31610	Symbols: REM1 | REM1 (REPRODUCTIVE MERISTEM 1); DNA binding / transcription factor | chr4:15317706-15319782 FORWARD	225.463	333.633
Brapa_ESTC021114	AT3G15270	Symbols: SPL5 | SPL5 (SQUAMOSA PROMOTER BINDING PROTEIN-LIKE 5); DNA binding / transcription factor | chr3:5140631-5141263 REVERSE	371.272	331.853
Brapa_ESTC040304	AT1G31050	| Symbols: | transcription factor | chr1:11075701-11076008 REVERSE	301.458	331.268
Brapa_ESTC041188	AT2G21237	Symbols: | similar to ATBPC5/BBR/BPC5/BPC5 (BASIC PENTACYSTEINE 5), DNA binding / transcription factor [Arabidopsis thaliana] (TAIR:AT4G38910.1) | chr2:9107765-9108265 REVERSE	234.453	331.045
Brapa_ESTC023799	AT2G30250	Symbols: ATWRKY25, WRKY25 | WRKY25 (WRKY DNA-binding protein 25); transcription factor | chr2:12910630-12912166 REVERSE	3144.34	330.315
Brapa_ESTC008775	AT1G32240	Symbols: KAN2 | KAN2 (KANADI 2); DNA binding / transcription factor | chr1:11625862-11630335 REVERSE	499.7	329.819
Brapa_ESTC025491	AT2G33610	Symbols: CHB2, ATSWI3B | ATSWI3B (Arabidopsis thaliana switching protein 3B); DNA binding | chr2:14236099-14238225 FORWARD	1052.93	329.702
Brapa_ESTC042103	AT2G45680	Symbols: | TCP family transcription factor, putative | chr2:18827791-18828861 REVERSE	384.474	329.492
Brapa_ESTC004536	AT1G18570	Symbols: AtMYB51, BW51A, BW51B, MYB51 | MYB51 (myb domain protein 51); DNA binding / transcription factor | chr1:6389758-6391019 FORWARD	553.473	326.952
Brapa_ESTC016279	AT2G03060	Symbols: | similar to AGL102, DNA binding / transcription factor [Arabidopsis thaliana] (TAIR:AT1G18750.1); similar to SRF-type transcription factor family protein [Oryza sativa (japonica cultivar-group)] (GB:ABA95182.1); contains InterPro domain transcription factor, MADS-box; (InterPro:IPR002100) | chr2:901613-903568 FORWARD	307.213	326.914
Brapa_ESTC007054	AT3G15510	Symbols: ANAC056, ATNAC2 | ATNAC2 (Arabidopsis thaliana NAC domain containing protein 2); transcription factor | chr3:5243703-5245044 FORWARD	1272.81	326.751
Brapa_ESTC020398	AT5G48670	Symbols: FEM111, AGL80 | AGL80/FEM111 (AGAMOUS-LIKE80); DNA binding / transcription factor | chr5:19756051-19757016 REVERSE	397.936	326.574
Brapa_ESTC035960	AT1G14600	Symbols: | DNA binding / transcription factor | chr1:5001180-5003365 REVERSE	307.341	325.953
Brapa_ESTC041559	AT5G10140	Symbols: FLF, AGL25, FLC | FLC (FLOWERING LOCUS C); transcription factor | chr5:3173725-3179340 REVERSE	535.26	325.621
Brapa_ESTC018047	AT2G03060	Symbols: | similar to AGL102, DNA binding / transcription factor [Arabidopsis thaliana] (TAIR:AT1G18750.1); similar to SRF-type transcription factor family protein [Oryza sativa (japonica cultivar-group)] (GB:ABA95182.1); contains InterPro domain transcription factor, MADS-box; (InterPro:IPR002100) | chr2:901613-903568 FORWARD	294.734	325.442
Brapa_ESTC014920	AT4G04635	Symbols: | DNA binding / transposase | chr4:2347901-2349154 FORWARD	351.947	325.016
Brapa_ESTC026512	AT1G21910	Symbols: | AP2 domain-containing transcription factor family protein | chr1:7696644-7697336 FORWARD	675.958	323.619
Brapa_ESTC023441	AT1G20980	Symbols: FBR6, SPL1R2, ATSPL14, SPL14 | SPL14 (SQUAMOSA PROMOTER BINDING PROTEIN-LIKE 14); DNA binding / transcription factor | chr1:7325031-7328922 FORWARD	891.671	323.434
Brapa_ESTC019708	AT1G10120	Symbols: | DNA binding / transcription factor | chr1:3304230-3305986 REVERSE	100.393	321.974
Brapa_ESTC031018	AT1G21450	Symbols: SCL1 | SCL1 (SCARECROW-LIKE 1); transcription factor | chr1:7509710-7511491 FORWARD	359.905	320.657
Brapa_ESTC043147	AT3G18400	Symbols: ANAC058 | ANAC058 (Arabidopsis NAC domain containing protein 58); transcription factor | chr3:6318751-6320599 REVERSE	176.785	319.661
Brapa_ESTC048198	AT2G28550	Symbols: RAP2.7, TOE1 | TOE1 (TARGET OF EAT1 1); DNA binding / transcription factor | chr2:12233521-12235328 REVERSE	491.323	319.638
Brapa_ESTC023911	AT1G66140	Symbols: ZFP4 | ZFP4 (ZINC FINGER PROTEIN 4); nucleic acid binding / transcription factor/ zinc ion binding | chr1:24623726-24624508 REVERSE	289.389	319.496
Brapa_ESTC008140	AT2G28350	Symbols: ARF10 | ARF10 (AUXIN RESPONSE FACTOR 10); miRNA binding / transcription factor | chr2:12121408-12123742 FORWARD	324.319	318.935
Brapa_ESTC046884	AT5G52260	Symbols: AtMYB19 | AtMYB19 (myb domain protein 19); DNA binding / transcription factor | chr5:21237391-21238449 FORWARD	178.788	318.829
Brapa_ESTC036845	AT1G48050	Symbols: KU80, ATKU80 | ATKU80/KU80 (Arabidopsis thaliana Ku80 homolog); double-stranded DNA binding / protein binding | chr1:17727167-17730528 FORWARD	475.829	316.334
Brapa_ESTC038766	AT4G17695	Symbols: KAN3 | KAN3 (KANADI 3); DNA binding / transcription factor | chr4:9848147-9850711 REVERSE	405.544	315.976
Brapa_ESTC040293	AT1G31140	Symbols: AGL63 | AGL63 (AGAMOUS-LIKE 63); DNA binding / transcription factor | chr1:11118012-11119654 FORWARD	168.475	315.823
Brapa_ESTC041707	AT2G35530	Symbols: | bZIP transcription factor family protein | chr2:14930359-14933104 REVERSE	312.015	315.251
Brapa_ESTC030994	AT2G28160	Symbols: FIT1, ATBHLH029, FRU, BHLH029 | ATBHLH029/BHLH029/FIT1/FRU (FE-DEFICIENCY INDUCED transcription factor 1); DNA binding / transcription factor | chr2:12011790-12012985 FORWARD	278.507	314.018
Brapa_ESTC034327	AT1G65440	Symbols: GTB1 | GTB1 (GLOBAL transcription factor GROUP B1); RNA binding / hydrolase, acting on ester bonds | chr1:24310571-24317990 REVERSE	361.893	313.617
Brapa_ESTC030176	AT1G16490	Symbols: AtMYB58 | AtMYB58 (myb domain protein 58); DNA binding / transcription factor | chr1:5629852-5630837 REVERSE	196.967	312.781
Brapa_ESTC022804	AT2G40970	Symbols: | myb family transcription factor | chr2:17104850-17105596 REVERSE	438.984	311.859
Brapa_ESTC029063	AT3G27260	Symbols: GTE8 | GTE8 (GLOBAL transcription factor GROUP E8); DNA binding | chr3:10069648-10073640 FORWARD	1259.6	311.051
Brapa_ESTC015696	AT1G08320	| Symbols: | DNA binding | chr1:2622110-2627448 REVERSE	326.537	310.648
Brapa_ESTC009047	AT5G07690	Symbols: AtMYB29, MYB29 | MYB29 (myb domain protein 29); DNA binding / transcription factor | chr5:2447091-2448286 FORWARD	322.548	310.009
Brapa_ESTC017528	AT1G52880	Symbols: ANAC018, ATNAM, NAM | NAM (Arabidopsis NAC domain containing protein 18); transcription factor | chr1:19692953-19694098 REVERSE	1003.29	309.943
Brapa_ESTC036989	AT5G61430	Symbols: ANAC100, ATNAC5 | ANAC100/ATNAC5 (Arabidopsis NAC domain containing protein 100); transcription factor | chr5:24718554-24719779 REVERSE	667.179	309.591
Brapa_ESTC017901	AT4G37750	Symbols: DRG, CKC, CKC1, ANT | ANT (AINTEGUMENTA); DNA binding / transcription factor | chr4:17739776-17742183 FORWARD	162.12	308.259
Brapa_ESTC006028	AT1G33760	Symbols: | AP2 domain-containing transcription factor, putative | chr1:12237924-12238478 FORWARD	361.62	307.927
Brapa_ESTC036116	AT3G56980	Symbols: ORG3 | ORG3 (OBP3-responsive gene 3); DNA binding / transcription factor | chr3:21097591-21098473 REVERSE	201.213	307.542
Brapa_ESTC019151	AT1G73830	Symbols: BEE3 | BEE3 (BR ENHANCED EXPRESSION 3); DNA binding / transcription factor | chr1:27763688-27765007 FORWARD	247.239	306.891
Brapa_ESTC014648	AT1G09540	Symbols: MYB61, AtMYB61 | MYB61 (myb domain protein 61); DNA binding / transcription factor | chr1:3086335-3087691 FORWARD	406.158	306.859
Brapa_ESTC043266	AT1G66390	Symbols: AtMYB90, PAP2, MYB90 | PAP2 (PRODUCTION OF ANTHOCYANIN PIGMENT 2); DNA binding / transcription factor | chr1:24767715-24769063 FORWARD	314.496	306.662
Brapa_ESTC042840	AT3G12977	| Symbols: | DNA binding | chr3:4143839-4145867 FORWARD	1223.47	306.158
Brapa_ESTC048354	AT4G16420	Symbols: PRZ1, ADA2B | ADA2B (PROPORZ1); DNA binding / transcription factor | chr4:9262828-9265798 REVERSE	118.916	305.324
Brapa_ESTC023158	AT1G09530	Symbols: PIF3, POC1, PAP3 | PIF3 (PHYTOCHROME INTERACTING FACTOR 3); DNA binding / transcription factor/ transcription regulator | chr1:3077218-3079369 FORWARD	2825.54	304.615
Brapa_ESTC036872	AT1G47720	Symbols: OSB1 | OSB1 (ORGANELLAR SINGLE-STRANDED); single-stranded DNA binding | chr1:17563954-17565299 REVERSE	399.232	304.381
Brapa_ESTC049635	AT5G08520	Symbols: | myb family transcription factor | chr5:2755471-2757742 REVERSE	914.342	303.677
Brapa_ESTC043659	AT3G54620	Symbols: ATBZIP25, BZO2H4 | BZO2H4 (basic leucine zipper O2 homolog 4); transcription factor | chr3:20229063-20231319 REVERSE	259.835	303.171
Brapa_ESTC018120	AT4G04890	Symbols: PDF2 | PDF2 (PROTODERMAL FACTOR2); DNA binding / transcription factor | chr4:2476968-2480088 REVERSE	426.343	301.873
Brapa_ESTC031162	AT3G15500	Symbols: ANAC055, ATNAC3 | ATNAC3 (ARABIDOPSIS NAC DOMAIN CONTAINING PROTEIN 55); transcription factor | chr3:5234738-5235889 FORWARD	1322.67	299.247
Brapa_ESTC017391	AT1G76890	Symbols: AT-GT2, GT2 | GT2 (GT2); transcription factor | chr1:28878105-28880097 REVERSE	297.994	298.313
Brapa_ESTC024914	AT5G46590	Symbols: ANAC096 | ANAC096 (Arabidopsis NAC domain containing protein 96); transcription factor | chr5:18922906-18924038 FORWARD	213.594	298.17
Brapa_ESTC017785	AT1G33240	Symbols: AT-GTL2 | AT-GTL1 (Arabidopsis thaliana GT2-like 1); transcription factor | chr1:12051839-12054300 REVERSE	1096.18	293.077
Brapa_ESTC024525	AT1G66600	Symbols: ATWRKY63, WRKY63 | WRKY63 (WRKY DNA-binding protein 63); transcription factor | chr1:24852069-24852998 FORWARD	124.006	292.06
Brapa_ESTC008480	AT5G04760	Symbols: | myb family transcription factor | chr5:1373753-1374530 REVERSE	401.111	292.043
Brapa_ESTC049403	AT1G27000	Symbols: | bZIP family transcription factor | chr1:9374055-9376409 FORWARD	264.436	291.537
Brapa_ESTC048306	AT2G23380	Symbols: ICU1, CLF | CLF (CURLY LEAF); transcription factor | chr2:9962650-9967197 FORWARD	323.789	291.31
Brapa_ESTC013429	AT5G60120	Symbols: TOE2 | TOE2 (TARGET OF EAT1 2); DNA binding / transcription factor | chr5:24225379-24228293 FORWARD	244.601	290.077
Brapa_ESTC040775	AT1G75490	Symbols: | DNA binding / transcription factor | chr1:28339706-28340326 FORWARD	211.595	289.478
Brapa_ESTC036439	AT1G07745	Symbols: ATRAD51D, RAD51D | ATRAD51D/RAD51D (Arabidopsis homolog of RAD51 D); DNA binding | chr1:2400794-2402839 REVERSE	197.271	287.56
Brapa_ESTC009227	AT1G59640	Symbols: BPE, BPEUB, BPEP, ZCW32 | ZCW32 (BIGPETAL, BIGPETALUB); DNA binding / transcription factor | chr1:21913129-21914695 REVERSE	342.805	285.534
Brapa_ESTC026571	AT2G02090	Symbols: ETL1, CHR19 | CHR19/ETL1 (chromatin remodeling 19); ATP binding / DNA binding / helicase | chr2:523480-526883 FORWARD	215.784	285.231
Brapa_ESTC030771	AT5G17810	Symbols: | homeobox-leucine zipper transcription factor family protein | chr5:5880578-5882604 REVERSE	190.397	284.871
Brapa_ESTC035342	AT1G25280	Symbols: AtTLP10 | AtTLP10 (TUBBY LIKE PROTEIN 10); phosphoric diester hydrolase/ transcription factor | chr1:8864948-8866595 FORWARD	649.731	284.475
Brapa_ESTC038668	AT3G27785	Symbols: MYB118 | MYB118 (myb domain protein 118); DNA binding / transcription factor | chr3:10290004-10291949 REVERSE	185.699	283.755
Brapa_ESTC047809	AT5G53210	Symbols: | DNA binding / transcription factor | chr5:21603832-21606167 REVERSE	229.636	282.859
Brapa_ESTC023698	AT2G38470	Symbols: ATWRKY33, WRKY33 | WRKY33 (WRKY DNA-binding protein 33); transcription factor | chr2:16115554-16117617 FORWARD	243.39	282.083
Brapa_ESTC036979	AT5G61420	Symbols: AtMYB28, MYB28 | MYB28 (myb domain protein 28); DNA binding / transcription factor | chr5:24706701-24708021 REVERSE	334.926	281.012
Brapa_ESTC010933	AT2G33480	Symbols: ANAC041 | ANAC041 (Arabidopsis NAC domain containing protein 41); transcription factor | chr2:14188351-14189323 FORWARD	177.026	281.003
Brapa_ESTC024559	AT3G06490	Symbols: AtMYB108, BOS1, MYB108 | MYB108 (BOTRYTIS-SUSCEPTIBLE1, myb domain protein 108); DNA binding / transcription factor | chr3:2004304-2006364 FORWARD	309.105	279.964
Brapa_ESTC016193	AT3G03450	Symbols: RGL2 | RGL2 (RGA-LIKE 2); transcription factor | chr3:819643-821286 REVERSE	315.656	279.941
Brapa_ESTC019729	AT5G17300	Symbols: | myb family transcription factor | chr5:5690437-5692437 REVERSE	165.248	279.116
Brapa_ESTC019452	AT3G28730	Symbols: SSRP1, NFD, ATHMG | ATHMG (HIGH MOBILITY GROUP, STRUCTURE-SPECIFIC RECOGNITION PROTEIN 1); transcription factor | chr3:10786191-10789735 FORWARD	399.83	279.076
Brapa_ESTC009926	AT1G19700	Symbols: BEL10 | BEL10 (BEL1-LIKE HOMEODOMAIN 10); DNA binding / transcription factor | chr1:6809949-6811845 REVERSE	369.081	277.602
Brapa_ESTC023606	AT4G05100	Symbols: AtMYB74 | AtMYB74 (myb domain protein 74); DNA binding / transcription factor | chr4:2618555-2619788 FORWARD	302.118	276.859
Brapa_ESTC038579	AT1G30650	Symbols: ATWRKY14, WRKY14, AR411 | WRKY14 (WRKY DNA-binding protein 14); transcription factor | chr1:10868594-10870955 FORWARD	212.294	275.483
Brapa_ESTC013637	AT4G02060	Symbols: MCM7, PRL | PRL (PROLIFERA); ATP binding / DNA binding / DNA-dependent ATPase | chr4:901484-905297 FORWARD	250.156	275.346
Brapa_ESTC038311	AT3G62340	Symbols: ATWRKY68, WRKY68 | WRKY68 (WRKY DNA-binding protein 68); transcription factor | chr3:23080603-23081609 REVERSE	240.656	275.285
Brapa_ESTC005096	AT2G34710	Symbols: ATHB14, ATHB-14, PHB-1D, PHB | PHB (PHABULOSA); DNA binding / transcription factor | chr2:14646627-14651072 REVERSE	188.197	274.444
Brapa_ESTC000991	AT1G29950	Symbols: | similar to transcription factor/ transcription regulator [Arabidopsis thaliana] (TAIR:AT5G50010.1); similar to Helix-loop-helix DNA-binding [Medicago truncatula] (GB:ABE90109.1); contains InterPro domain Helix-loop-helix DNA-binding; (InterPro:IPR011598); contains InterPro domain Basic helix-loop-helix dimerisation region bHLH; (InterPro:IPR001092) | chr1:10493445-10494200 FORWARD	790.77	273.258
Brapa_ESTC023590	AT5G22380	Symbols: ANAC090 | ANAC090 (Arabidopsis NAC domain containing protein 90); transcription factor | chr5:7408927-7410041 REVERSE	199.698	272.707
Brapa_ESTC014915	AT4G01250	Symbols: ATWRKY22, WRKY22 | WRKY22 (WRKY DNA-binding protein 22); transcription factor | chr4:522839-524129 REVERSE	256.991	270.918
Brapa_ESTC007473	AT3G23250	Symbols: MYB15, AtY19, AtMYB15 | AtMYB15/AtY19/MYB15 (myb domain protein 15); DNA binding / transcription factor | chr3:8309499-8310631 FORWARD	330.461	270.305
Brapa_ESTC005014	AT1G22810	Symbols: | AP2 domain-containing transcription factor, putative | chr1:8074524-8074958 REVERSE	438.9	269.501
Brapa_ESTC016381	AT1G63020	Symbols: SDE4, NRPD1, NRPD1a | NRPD1a (nuclear RNA polymerase D 1a); DNA binding / DNA-directed RNA polymerase | chr1:23358994-23364791 REVERSE	242.59	267.002
Brapa_ESTC025042	AT1G51190	Symbols: PLT2 | PLT2 (PLETHORA 2); transcription factor | chr1:18981185-18983973 FORWARD	241.33	266.164
Brapa_ESTC009320	AT1G35490	Symbols: | bZIP family transcription factor | chr1:13061834-13063144 FORWARD	105.723	264.505
Brapa_ESTC016156	AT5G25470	| Symbols: | DNA binding | chr5:8865857-8867237 REVERSE	897.121	263.452
Brapa_ESTC024369	AT1G03190	Symbols: ATXPD, UVH6 | UVH6 (ULTRAVIOLET HYPERSENSITIVE 6); ATP binding / ATP-dependent DNA helicase/ ATP-dependent helicase/ DNA binding / hydrolase, acting on acid anhydrides, in phosphorus-containing anhydrides / nucleic acid binding | chr1:775822-779863 FORWARD	282.471	262.069
Brapa_ESTC022696	AT1G13300	Symbols: | myb family transcription factor | chr1:4556974-4558588 FORWARD	259.068	262
Brapa_ESTC027157	AT2G23790	Symbols: | similar to transcription factor [Arabidopsis thaliana] (TAIR:AT4G36820.1); similar to Os10g0501500 [Oryza sativa (japonica cultivar-group)] (GB:NP_001064986.1); similar to Protein of unknown function DUF607 [Medicago truncatula] (GB:ABE78504.1); similar to Os03g0233000 [Oryza sativa (japonica cultivar-group)] (GB:NP_001049472.1); contains InterPro domain Protein of unknown function DUF…	368.169	261.99
Brapa_ESTC040083	AT1G26840	Symbols: ORC6, ATORC6 | ATORC6/ORC6 (Origin recognition complex protein 6); DNA binding | chr1:9298809-9300590 FORWARD	141.186	259.605
Brapa_ESTC006803	AT5G66770	Symbols: | scarecrow transcription factor family protein | chr5:26677949-26679703 FORWARD	294.282	258.877
Brapa_ESTC043573	AT3G52270	Symbols: | ATP binding / RNA polymerase II transcription factor | chr3:19398158-19399865 REVERSE	251.281	258.491
Brapa_ESTC033550	AT1G15050	Symbols: IAA34 | IAA34 (indoleacetic acid-induced protein 34); transcription factor | chr1:5182251-5183238 REVERSE	292.993	256.861
Brapa_ESTC036056	AT5G16770	Symbols: AtMYB9 | AtMYB9 (myb domain protein 9); DNA binding | chr5:5515212-5516737 FORWARD	300.445	255.451
Brapa_ESTC016783	AT5G52510	Symbols: | scarecrow-like transcription factor 8 (SCL8) | chr5:21324422-21326344 FORWARD	560.359	255.084
Brapa_ESTC035335	AT1G25340	Symbols: AtMYB116, MYB116 | MYB116 (myb domain protein 116); DNA binding / transcription factor | chr1:8885197-8886258 FORWARD	193.823	254.956
Brapa_ESTC021899	AT1G55750	Symbols: | transcription factor-related | chr1:20844115-20848801 REVERSE	216.359	254.014
Brapa_ESTC029119	AT5G49520	Symbols: ATWRKY48, WRKY48 | WRKY48 (WRKY DNA-binding protein 48); transcription factor | chr5:20108116-20110093 FORWARD	1157.31	253.893
Brapa_ESTC013065	AT4G36990	Symbols: HSFB1, AT-HSFB1, ATHSF4, HSF4 | HSF4 (HEAT SHOCK FACTOR 4); DNA binding / transcription factor | chr4:17440654-17441700 FORWARD	828.603	253.711
Brapa_ESTC051496	AT1G04960	Symbols: | similar to bZIP family transcription factor [Arabidopsis thaliana] (TAIR:AT1G27000.1); similar to unknown [Striga asiatica] (GB:ABD98037.1); similar to Os05g0182700 [Oryza sativa (japonica cultivar-group)] (GB:NP_001054821.1); contains InterPro domain Protein of unknown function DUF1664; (InterPro:IPR012458) | chr1:1408020-1410672 REVERSE	248.081	252.791
Brapa_ESTC022314	AT5G57390	Symbols: AIL5 | AIL5 (AINTEGUMENTA-LIKE 5); DNA binding / transcription factor | chr5:23270685-23273663 REVERSE	406.191	252.038
Brapa_ESTC016071	AT1G46480	Symbols: | homeobox-leucine zipper transcription factor family protein | chr1:17239343-17240393 REVERSE	480.151	251.248
Brapa_ESTC038034	AT1G07640	Symbols: OBP2 | OBP2 (OBF BINDING PROTEIN 2); DNA binding | chr1:2354704-2356009 REVERSE	492.971	251.21
Brapa_ESTC048371	AT5G20240	Symbols: PI | PI (PISTILLATA); DNA binding / transcription factor | chr5:6829205-6831210 FORWARD	153.361	250.888
Brapa_ESTC031473	AT1G27050	Symbols: ATHB54 | ATHB54 (ARABIDOPSIS THALIANA HOMEOBOX PROTEIN 54); nucleic acid binding / transcription factor | chr1:9391880-9394395 FORWARD	321.528	250.274
Brapa_ESTC040376	AT1G68320	Symbols: AtMYB62, BW62B, BW62C, MYB62 | MYB62 (myb domain protein 62); DNA binding / transcription factor | chr1:25607505-25608547 FORWARD	162.989	248.285
Brapa_ESTC021490	AT4G38900	| Symbols: | DNA binding | chr4:18139558-18141514 REVERSE	481.609	248.096
Brapa_ESTC017301	AT1G01520	Symbols: | myb family transcription factor | chr1:190596-192139 FORWARD	85.2127	247.23
Brapa_ESTC044844	AT4G32700	Symbols: | ATP binding / ATP-dependent helicase/ DNA binding / DNA-directed DNA polymerase/ helicase/ nucleic acid binding | chr4:15767445-15779190 FORWARD	179.478	246.898
Brapa_ESTC035856	AT1G10610	Symbols: | DNA binding / transcription factor | chr1:3506464-3508753 FORWARD	212.434	246.885
Brapa_ESTC018229	AT3G63030	Symbols: MBD4 | MBD4 (methyl-CpG-binding domain 4); DNA binding | chr3:23306369-23307400 FORWARD	254.755	246.746
Brapa_ESTC017806	AT2G31370	Symbols: | DNA binding / transcription factor | chr2:13386525-13388114 FORWARD	182.049	246.502
Brapa_ESTC033587	AT4G17060	Symbols: | similar to transcription factor [Arabidopsis thaliana] (TAIR:AT2G44730.1); contains domain Origin of replication-binding domain, RBD-like (SSF55464) | chr4:9593740-9594672 REVERSE	332.175	245.861
Brapa_ESTC018416	AT3G59080	| Symbols: | DNA binding | chr3:21847789-21849396 FORWARD	1084.28	245.237
Brapa_ESTC040903	AT1G51120	Symbols: | AP2 domain-containing transcription factor, putative | chr1:18941759-18942817 FORWARD	172.942	245.174
Brapa_ESTC033536	AT3G01220	Symbols: ATHB20 | ATHB20 (ARABIDOPSIS THALIANA HOMEOBOX PROTEIN 20); DNA binding / transcription factor | chr3:73606-75302 FORWARD	118.232	244.788
Brapa_ESTC045450	AT5G06070	Symbols: RAB, RBE | RBE (RABBIT EARS); nucleic acid binding / transcription factor/ zinc ion binding | chr5:1828427-1829107 REVERSE	261.411	244.166
Brapa_ESTC024382	AT3G54280	Symbols: | ATP binding / DNA binding / helicase | chr3:20103339-20114785 FORWARD	274.586	242.988
Brapa_ESTC018658	AT5G06310	Symbols: ATPOT1 | ATPOT1 (PROTECTION OF TELOMERES 1); DNA binding | chr5:1928469-1930796 FORWARD	305.711	241.31
Brapa_ESTC024371	AT3G18400	Symbols: ANAC058 | ANAC058 (Arabidopsis NAC domain containing protein 58); transcription factor | chr3:6318751-6320599 REVERSE	111.309	240.623
Brapa_ESTC040904	AT1G51120	Symbols: | AP2 domain-containing transcription factor, putative | chr1:18941759-18942817 FORWARD	265.404	238.838
Brapa_ESTC007536	AT1G63020	Symbols: SDE4, NRPD1, NRPD1a | NRPD1a (nuclear RNA polymerase D 1a); DNA binding / DNA-directed RNA polymerase | chr1:23358994-23364791 REVERSE	211.213	238.014
Brapa_ESTC024696	AT3G23250	Symbols: MYB15, AtY19, AtMYB15 | AtMYB15/AtY19/MYB15 (myb domain protein 15); DNA binding / transcription factor | chr3:8309499-8310631 FORWARD	272.825	234.213
Brapa_ESTC023546	AT1G80740	Symbols: CMT1 | CMT1 (CHROMOMETHYLASE 1); DNA binding | chr1:30347286-30351723 FORWARD	229.859	234.139
Brapa_ESTC044720	AT4G31610	Symbols: REM1 | REM1 (REPRODUCTIVE MERISTEM 1); DNA binding / transcription factor | chr4:15317706-15319782 FORWARD	149.671	233.519
Brapa_ESTC011209	AT2G16910	Symbols: AMS | AMS (ABORTED MICROSPORES); DNA binding / transcription factor | chr2:7338803-7341159 FORWARD	176.585	233.048
Brapa_ESTC017951	AT2G38090	Symbols: | myb family transcription factor | chr2:15952356-15953853 FORWARD	682.707	231.246
[truncated: 347 more rows]

## Sheet: Constitutive
SEQ_ID	TAIR7_cds ID	Description, blastN	White leaves	Yellow leaves	Y/W
Brapa_ESTC041049	AT2G21660	Symbols: GR-RBP7, CCR2, ATGRP7 | ATGRP7 (COLD, CIRCADIAN RHYTHM, AND RNA BINDING 2); RNA binding / double-stranded DNA binding / single-stranded DNA binding | chr2:9272557-9273396 REVERSE	57741.3	59728.4	1.03441
Brapa_ESTC000857	AT1G20696	Symbols: NFD3, NFD03, HMGB3 | HMGB3 (HIGH MOBILITY GROUP B 3); transcription factor | chr1:7179815-7181164 FORWARD	51956.9	55654.4	1.07116
Brapa_ESTC036377	AT4G04635	Symbols: | DNA binding / transposase | chr4:2347901-2349154 FORWARD	48150.4	42794.7	0.888771
Brapa_ESTC038316	AT3G62420	Symbols: ATBZIP53 | ATBZIP53 (BASIC REGION/LEUCINE ZIPPER MOTIF 53); DNA binding / sequence-specific DNA binding / transcription factor | chr3:23102820-23103260 REVERSE	43896	42610.7	0.970719
Brapa_ESTC008254	AT1G20696	Symbols: NFD3, NFD03, HMGB3 | HMGB3 (HIGH MOBILITY GROUP B 3); transcription factor | chr1:7179815-7181164 FORWARD	43749.6	46772.5	1.0691
Brapa_ESTC035785	AT4G04635	Symbols: | DNA binding / transposase | chr4:2347901-2349154 FORWARD	42616.2	36704.1	0.861271
Brapa_ESTC020445	AT2G22430	Symbols: ATHB6 | ATHB6 (ARABIDOPSIS THALIANA HOMEOBOX PROTEIN 6); transcription factor | chr2:9533550-9534692 REVERSE	33659.9	33393.7	0.992091
Brapa_ESTC006873	AT4G37790	Symbols: HAT22 | HAT22 (homeobox-leucine zipper protein 22); transcription factor | chr4:17768235-17769266 FORWARD	33486.3	36345.5	1.08538
Brapa_ESTC006659	AT1G06040	Symbols: STO | STO (SALT TOLERANCE); transcription factor/ zinc ion binding | chr1:1828661-1829658 REVERSE	31793.5	35971.8	1.13142
Brapa_ESTC012242	AT1G51200	Symbols: | DNA binding / zinc ion binding | chr1:18989358-18989879 FORWARD	31265.6	35735.3	1.14296
Brapa_ESTC018414	AT3G02380	Symbols: COL2 | COL2 (CONSTANS-LIKE 2); transcription factor/ zinc ion binding | chr3:487445-488631 REVERSE	30916.4	29830.6	0.964879
Brapa_ESTC035390	AT3G19290	Symbols: AREB2, ABF4 | ABF4 (ABRE BINDING FACTOR 4); DNA binding / transcription factor/ transcriptional activator | chr3:6687962-6689790 FORWARD	30365.1	31617.1	1.04123
Brapa_ESTC005646	AT5G05090	Symbols: | myb family transcription factor | chr5:1503394-1504194 FORWARD	30295.9	27240.9	0.899161
Brapa_ESTC021790	AT5G48150	Symbols: PAT1 | PAT1 (PHYTOCHROME A SIGNAL TRANSDUCTION 1); transcription factor | chr5:19539723-19541279 REVERSE	30126.4	30543.9	1.01386
Brapa_ESTC011221	AT1G75240	Symbols: ATHB33 | ATHB33 (ARABIDOPSIS THALIANA HOMEOBOX PROTEIN 33); DNA binding / transcription factor | chr1:28245237-28246166 FORWARD	29838.6	33825.5	1.13362
Brapa_ESTC025489	AT1G13260	Symbols: RAV1 | RAV1 (Related to ABI3/VP1 1); DNA binding / transcription factor | chr1:4542383-4543417 FORWARD	29750.8	26963.4	0.906308
Brapa_ESTC021486	AT1G51200	Symbols: | DNA binding / zinc ion binding | chr1:18989358-18989879 FORWARD	28917.8	31944.8	1.10468
Brapa_ESTC013702	AT2G46680	Symbols: ATHB7, ATHB-7 | ATHB-7 (ARABIDOPSIS THALIANA HOMEOBOX 7); transcription factor | chr2:19172847-19173843 REVERSE	28692.8	32631.7	1.13728
Brapa_ESTC041132	AT2G22430	Symbols: ATHB6 | ATHB6 (ARABIDOPSIS THALIANA HOMEOBOX PROTEIN 6); transcription factor | chr2:9533550-9534692 REVERSE	28494.6	28588.5	1.0033
Brapa_ESTC044238	AT4G18390	Symbols: | TCP family transcription factor, putative | chr4:10163223-10164320 REVERSE	27532.7	24904.8	0.904553
Brapa_ESTC030656	AT1G06040	Symbols: STO | STO (SALT TOLERANCE); transcription factor/ zinc ion binding | chr1:1828661-1829658 REVERSE	25431.5	25933.5	1.01974
Brapa_ESTC020072	AT5G15850	Symbols: COL1 | COL1 (CONSTANS-LIKE 1); transcription factor/ zinc ion binding | chr5:5176300-5177476 REVERSE	24898.2	28328.5	1.13777
Brapa_ESTC000017	AT3G62420	Symbols: ATBZIP53 | ATBZIP53 (BASIC REGION/LEUCINE ZIPPER MOTIF 53); DNA binding / sequence-specific DNA binding / transcription factor | chr3:23102820-23103260 REVERSE	24186.8	26732.7	1.10526
Brapa_ESTC045567	AT5G13330	Symbols: RAP2.6L | RAP2.6L (related to AP2 6L); DNA binding / transcription factor | chr5:4272387-4274464 FORWARD	23598.9	21874.8	0.926942
Brapa_ESTC010101	AT3G16770	Symbols: RAP2.3, ATEBP | ATEBP/RAP2.3 (RELATED TO AP2 3); DNA binding / protein binding / transcription factor/ transcriptional activator | chr3:5705790-5706774 FORWARD	23357.6	20404.1	0.873553
Brapa_ESTC018766	AT3G13810	Symbols: ATIDD11 | ATIDD11 (ARABIDOPSIS THALIANA INDETERMINATE(ID)-DOMAIN 11); nucleic acid binding / transcription factor/ zinc ion binding | chr3:4544948-4547307 FORWARD	23336.8	20317.9	0.870638
Brapa_ESTC001561	AT1G20693	Symbols: HMG BETA 1, NFD2, NFD02, HMGB2 | HMGB2 (HIGH MOBILITY GROUP B 2); transcription factor | chr1:7177272-7178477 FORWARD	22556.6	25899.6	1.1482
Brapa_ESTC010997	AT1G06040	Symbols: STO | STO (SALT TOLERANCE); transcription factor/ zinc ion binding | chr1:1828661-1829658 REVERSE	22552.1	21812.4	0.9672
Brapa_ESTC023894	AT2G30590	Symbols: WRKY21 | WRKY21 (WRKY DNA-binding protein 21); transcription factor | chr2:13040968-13042380 FORWARD	21428.4	18833.7	0.878913
Brapa_ESTC027737	AT5G08330	Symbols: | TCP family transcription factor, putative | chr5:2680829-2681548 FORWARD	21203	22035	1.03924
Brapa_ESTC018840	AT3G24120	Symbols: | myb family transcription factor | chr3:8705932-8708155 REVERSE	20846.7	20822.9	0.998858
Brapa_ESTC022718	AT1G04250	Symbols: IAA17, AXR3 | AXR3 (AUXIN RESISTANT 3); transcription factor | chr1:1136381-1138339 FORWARD	20390.2	22969.4	1.12649
Brapa_ESTC046861	AT5G52660	Symbols: | myb family transcription factor | chr5:21376649-21379263 REVERSE	20224.5	17591.8	0.869826
Brapa_ESTC044775	AT4G31720	Symbols: STG1, TAFII15 | TAFII15 (SALT TOLERANCE DURING GERMINATION 1); transcription factor | chr4:15354229-15355710 REVERSE	20197.6	22893.2	1.13346
Brapa_ESTC032993	AT5G60410	Symbols: ATSIZ1, SIZ1 | ATSIZ1/SIZ1; DNA binding | chr5:24312452-24318056 FORWARD	19773	17751.3	0.897755
Brapa_ESTC045809	AT5G17810	Symbols: | homeobox-leucine zipper transcription factor family protein | chr5:5880578-5882604 REVERSE	19382.8	21335.5	1.10074
Brapa_ESTC041123	AT1G57820	Symbols: VIM1 | VIM1 (VARIANT IN METHYLATION 1); DNA binding | chr1:21418007-21421567 REVERSE	18725.2	18041.2	0.963472
Brapa_ESTC008873	AT3G23050	Symbols: AXR2, IAA7 | IAA7 (AUXIN RESISTANT 2); transcription factor | chr3:8194775-8196723 FORWARD	18437.7	18076.8	0.980426
Brapa_ESTC020819	AT4G11060	Symbols: MTSSB | MTSSB (MITOCHONDRIALLY TARGETED SINGLE-STRANDED DNA binding PROTEIN); single-stranded DNA binding | chr4:6754816-6756226 REVERSE	18128.9	17286.8	0.953549
Brapa_ESTC004857	AT1G20696	Symbols: NFD3, NFD03, HMGB3 | HMGB3 (HIGH MOBILITY GROUP B 3); transcription factor | chr1:7179815-7181164 FORWARD	18112.4	17746.3	0.979787
Brapa_ESTC042258	AT2G03070	Symbols: | similar to NPH4 (NON-PHOTOTROPHIC HYPOCOTYL), transcription factor [Arabidopsis thaliana] (TAIR:AT5G20730.3); similar to hypothetical protein Os03g31010 [Oryza sativa (japonica cultivar-group)] (GB:AAP20836.1) | chr2:905977-908791 FORWARD	18059.7	19314.7	1.06949
Brapa_ESTC014282	AT2G42680	Symbols: MBF1A, ATMBF1A | ATMBF1A/MBF1A (MULTIPROTEIN BRIDGING FACTOR 1A); DNA binding / transcription coactivator | chr2:17782049-17783193 FORWARD	17866	19167.9	1.07287
Brapa_ESTC030931	AT1G51950	Symbols: IAA18 | IAA18 (indoleacetic acid-induced protein 18); transcription factor | chr1:19309339-19310799 FORWARD	17624.5	15307	0.868507
Brapa_ESTC010946	AT2G22430	Symbols: ATHB6 | ATHB6 (ARABIDOPSIS THALIANA HOMEOBOX PROTEIN 6); transcription factor | chr2:9533550-9534692 REVERSE	17292.2	14920.2	0.862828
Brapa_ESTC043297	AT3G23030	Symbols: IAA2 | IAA2 (indoleacetic acid-induced protein 2); transcription factor | chr3:8181076-8181692 REVERSE	17056.2	17771.1	1.04191
Brapa_ESTC009185	AT1G13260	Symbols: RAV1 | RAV1 (Related to ABI3/VP1 1); DNA binding / transcription factor | chr1:4542383-4543417 FORWARD	17027.9	19485.7	1.14434
Brapa_ESTC024370	AT5G49450	Symbols: ATBZIP1 | bZIP family transcription factor | chr5:20069371-20069808 FORWARD	16957.9	17025.6	1.00399
Brapa_ESTC013148	AT5G23280	Symbols: | TCP family transcription factor, putative | chr5:7843020-7843772 FORWARD	16767.3	15384.8	0.917548
Brapa_ESTC029647	AT4G37790	Symbols: HAT22 | HAT22 (homeobox-leucine zipper protein 22); transcription factor | chr4:17768235-17769266 FORWARD	16697.1	19157.8	1.14737
Brapa_ESTC010789	AT2G22430	Symbols: ATHB6 | ATHB6 (ARABIDOPSIS THALIANA HOMEOBOX PROTEIN 6); transcription factor | chr2:9533550-9534692 REVERSE	16468.3	15616.6	0.948282
Brapa_ESTC006772	AT2G17040	Symbols: ANAC036 | ANAC036 (Arabidopsis NAC domain containing protein 36); transcription factor | chr2:7414205-7415202 FORWARD	15366.3	14607.5	0.950619
Brapa_ESTC042862	AT3G12810	Symbols: SRCAP, CHR13, PIE1 | PIE1 (PHOTOPERIOD-INDEPENDENT EARLY FLOWERING 1); ATP binding / DNA binding / helicase | chr3:4065643-4073999 FORWARD	14951.5	15532.8	1.03888
Brapa_ESTC032134	AT5G12400	Symbols: | PHD finger transcription factor, putative | chr5:4013814-4020910 FORWARD	14840.6	16432.5	1.10727
Brapa_ESTC035162	AT4G31920	Symbols: ARR10 | ARR10 (ARABIDOPSIS RESPONSE REGULATOR 10); transcription factor/ two-component response regulator | chr4:15444296-15446772 REVERSE	14609	16372.9	1.12074
Brapa_ESTC036539	AT3G15210	Symbols: ATERF-4, ERF4, RAP2.5, ATERF4 | ATERF-4/ATERF4/ERF4/RAP2.5 (ETHYLENE RESPONSIVE ELEMENT BINDING FACTOR 4); DNA binding / protein binding / transcription factor/ transcriptional repressor | chr3:5121479-5122147 FORWARD	14546.6	15411.7	1.05947
Brapa_ESTC041016	AT2G18160	Symbols: ATBZIP2, GBF5 | GBF5 (G-box binding factor 5); DNA binding / transcription factor | chr2:7905370-7905885 REVERSE	14474.2	15567.5	1.07553
Brapa_ESTC043261	AT3G24120	Symbols: | myb family transcription factor | chr3:8705932-8708155 REVERSE	14270.2	15864.7	1.11174
Brapa_ESTC004512	AT3G19290	Symbols: AREB2, ABF4 | ABF4 (ABRE BINDING FACTOR 4); DNA binding / transcription factor/ transcriptional activator | chr3:6687962-6689790 FORWARD	14158.9	12708.1	0.897534
Brapa_ESTC031565	AT1G28370	Symbols: ERF11, ATERF11 | ATERF11/ERF11 (ERF domain protein 11); DNA binding / transcription factor/ transcriptional repressor | chr1:9956337-9956837 REVERSE	13714.3	14195.4	1.03508
Brapa_ESTC021906	AT3G02990	Symbols: HSFA1E, ATHSFA1E | ATHSFA1E (Arabidopsis thaliana heat shock transcription factor A1E); DNA binding / transcription factor | chr3:673621-675995 FORWARD	13694	13880.8	1.01364
Brapa_ESTC027059	AT1G58025	| Symbols: | DNA binding | chr1:21461884-21465422 REVERSE	13427.3	12058.6	0.898066
Brapa_ESTC010994	AT5G08330	Symbols: | TCP family transcription factor, putative | chr5:2680829-2681548 FORWARD	12898.8	13993.4	1.08486
Brapa_ESTC015822	AT2G41630	Symbols: TFIIB | TFIIB (transcription factor II B); RNA polymerase II transcription factor | chr2:17362633-17364478 REVERSE	12597.7	11296.9	0.896743
Brapa_ESTC034801	AT2G45660	Symbols: SOC1, AGL20 | AGL20 (AGAMOUS-LIKE 20); transcription factor | chr2:18814873-18817267 REVERSE	12431.9	12923.8	1.03957
Brapa_ESTC039319	AT1G04240	Symbols: IAA3, SHY2 | SHY2 (SHORT HYPOCOTYL 2); transcription factor | chr1:1128563-1129318 REVERSE	12309.3	13000	1.05611
Brapa_ESTC023404	AT4G40040	| Symbols: | DNA binding | chr4:18557533-18558230 REVERSE	12288.3	13772.4	1.12077
Brapa_ESTC033093	AT4G10710	Symbols: SPT16 | SPT16 (GLOBAL transcription factor C); metalloexopeptidase | chr4:6602222-6605446 REVERSE	12253.2	12410.3	1.01282
Brapa_ESTC032376	AT5G08330	Symbols: | TCP family transcription factor, putative | chr5:2680829-2681548 FORWARD	12051	11316.9	0.939084
Brapa_ESTC007848	AT5G08330	Symbols: | TCP family transcription factor, putative | chr5:2680829-2681548 FORWARD	11927.6	13426.7	1.12568
Brapa_ESTC012302	AT4G35040	Symbols: | bZIP transcription factor family protein | chr4:16680826-16681810 FORWARD	11717.2	11590.1	0.989153
Brapa_ESTC019603	AT1G04240	Symbols: IAA3, SHY2 | SHY2 (SHORT HYPOCOTYL 2); transcription factor | chr1:1128563-1129318 REVERSE	11626.5	10372.4	0.892134
Brapa_ESTC027629	AT1G43860	| Symbols: | transcription factor | chr1:16624684-16626825 REVERSE	11567.6	10501.1	0.907803
Brapa_ESTC028815	AT1G06040	Symbols: STO | STO (SALT TOLERANCE); transcription factor/ zinc ion binding | chr1:1828661-1829658 REVERSE	11402.3	10124.5	0.887935
Brapa_ESTC019044	AT2G45660	Symbols: SOC1, AGL20 | AGL20 (AGAMOUS-LIKE 20); transcription factor | chr2:18814873-18817267 REVERSE	11313.2	10077.1	0.890738
Brapa_ESTC043552	AT3G51910	Symbols: HSFA7A, AT-HSFA7A | AT-HSFA7A (Arabidopsis thaliana heat shock transcription factor A7A); DNA binding / transcription factor | chr3:19276272-19277597 FORWARD	11283	10549.5	0.934991
Brapa_ESTC030707	AT2G43060	| Symbols: | transcription factor | chr2:17916324-17916794 FORWARD	11107.2	10411.2	0.937338
Brapa_ESTC010487	AT4G26110	Symbols: NAP1;1 | NAP1;1 (NUCLEOSOME ASSEMBLY PROTEIN1;1); DNA binding | chr4:13232721-13235511 FORWARD	11083.7	12707.8	1.14653
Brapa_ESTC022413	AT5G67190	Symbols: | AP2 domain-containing transcription factor, putative | chr5:26826361-26826915 REVERSE	10994.2	9430.84	0.857801
Brapa_ESTC001423	AT5G48150	Symbols: PAT1 | PAT1 (PHYTOCHROME A SIGNAL TRANSDUCTION 1); transcription factor | chr5:19539723-19541279 REVERSE	10806	12224.3	1.13125
Brapa_ESTC013139	AT5G51190	Symbols: | AP2 domain-containing transcription factor, putative | chr5:20817934-20818599 REVERSE	10766.1	9919.47	0.921361
Brapa_ESTC005609	AT1G27000	Symbols: | bZIP family transcription factor | chr1:9374055-9376409 FORWARD	10658.6	10326.4	0.968833
Brapa_ESTC027667	AT5G24590	Symbols: ANAC091, TIP | TIP (TCV-INTERACTING PROTEIN); transcription factor | chr5:8416923-8418726 REVERSE	10565.6	9130.28	0.864152
Brapa_ESTC042984	AT3G11100	| Symbols: | transcription factor | chr3:3476496-3477326 REVERSE	10468.5	10635.7	1.01597
Brapa_ESTC042561	AT3G04670	Symbols: ATWRKY39, WRKY39 | WRKY39 (WRKY DNA-binding protein 39); transcription factor | chr3:1266536-1267697 REVERSE	10467.9	11959.4	1.14248
Brapa_ESTC005443	AT5G25220	Symbols: KNAT3 | KNAT3 (KNOTTED1-LIKE HOMEOBOX GENE 3); transcription factor | chr5:8736211-8738118 FORWARD	10398.8	11233.5	1.08027
Brapa_ESTC012150	AT3G12480	Symbols: | transcription factor, putative | chr3:3958072-3960285 FORWARD	10162.5	8839.14	0.86978
Brapa_ESTC023951	AT5G61420	Symbols: AtMYB28, MYB28 | MYB28 (myb domain protein 28); DNA binding / transcription factor | chr5:24706701-24708021 REVERSE	10011.8	11440.5	1.1427
Brapa_ESTC010245	AT3G62420	Symbols: ATBZIP53 | ATBZIP53 (BASIC REGION/LEUCINE ZIPPER MOTIF 53); DNA binding / sequence-specific DNA binding / transcription factor | chr3:23102820-23103260 REVERSE	9940.36	10909.9	1.09754
Brapa_ESTC012149	AT1G04100	Symbols: IAA10 | IAA10 (indoleacetic acid-induced protein 10); transcription factor | chr1:1059808-1061025 FORWARD	9752.77	9946.17	1.01983
Brapa_ESTC013113	AT3G12480	Symbols: | transcription factor, putative | chr3:3958072-3960285 FORWARD	9501.08	8963.73	0.943443
Brapa_ESTC018918	AT5G61420	Symbols: AtMYB28, MYB28 | MYB28 (myb domain protein 28); DNA binding / transcription factor | chr5:24706701-24708021 REVERSE	9475.94	10419.5	1.09957
Brapa_ESTC033953	AT5G43250	Symbols: | transcription factor, putative | chr5:17373402-17373794 REVERSE	9390.38	9232.22	0.983157
Brapa_ESTC011095	AT2G45660	Symbols: SOC1, AGL20 | AGL20 (AGAMOUS-LIKE 20); transcription factor | chr2:18814873-18817267 REVERSE	9254.95	9541.1	1.03092
Brapa_ESTC007476	AT3G20770	Symbols: EIN3 | EIN3 (ETHYLENE-INSENSITIVE3); transcription factor | chr3:7260708-7262594 REVERSE	9234.76	8617.18	0.933124
Brapa_ESTC024886	AT3G23050	Symbols: AXR2, IAA7 | IAA7 (AUXIN RESISTANT 2); transcription factor | chr3:8194775-8196723 FORWARD	9202.33	9797.89	1.06472
Brapa_ESTC043337	AT3G25890	Symbols: | AP2 domain-containing transcription factor, putative | chr3:9477289-9478287 FORWARD	8952.63	7759.89	0.866772
Brapa_ESTC019169	AT2G18280	Symbols: AtTLP2 | AtTLP2 (TUBBY LIKE PROTEIN 2); phosphoric diester hydrolase/ transcription factor | chr2:7953836-7955258 FORWARD	8783.65	9426.04	1.07313
Brapa_ESTC025998	AT3G25890	Symbols: | AP2 domain-containing transcription factor, putative | chr3:9477289-9478287 FORWARD	8698.52	7860.21	0.903626
Brapa_ESTC046120	AT5G46880	Symbols: HB-7 | HB-7 (homeobox-7); DNA binding / transcription factor | chr5:19048767-19052615 FORWARD	8686.9	8710.34	1.0027
Brapa_ESTC011152	AT3G13445	Symbols: TFIID-1, TBP1 | TBP1 (transcription factor IID-1); DNA binding / RNA polymerase II transcription factor | chr3:4380324-4381876 FORWARD	8672.7	8355.33	0.963406
Brapa_ESTC045046	AT4G34000	Symbols: ABF3, DPBF5 | ABF3/DPBF5 (ABSCISIC ACID RESPONSIVE ELEMENTS-BINDING FACTOR 3); DNA binding / protein binding / transcription factor/ transcriptional activator | chr4:16296013-16297976 FORWARD	8618.61	9716.04	1.12733
Brapa_ESTC028321	AT4G34000	Symbols: ABF3, DPBF5 | ABF3/DPBF5 (ABSCISIC ACID RESPONSIVE ELEMENTS-BINDING FACTOR 3); DNA binding / protein binding / transcription factor/ transcriptional activator | chr4:16296013-16297599 FORWARD	8596.23	9609.77	1.11791
Brapa_ESTC023241	AT4G16110	Symbols: ARR2 | ARR2 (ARABIDOPSIS RESPONSE REGULATOR 2); transcription factor/ two-component response regulator | chr4:9112989-9115646 FORWARD	8583.03	9625.62	1.12147
Brapa_ESTC014403	AT5G11060	Symbols: KNAT4 | KNAT4 (KNOTTED1-LIKE HOMEOBOX GENE 4); transcription factor | chr5:3510409-3512968 FORWARD	8461.12	7682.07	0.907926
Brapa_ESTC008878	AT4G31920	Symbols: ARR10 | ARR10 (ARABIDOPSIS RESPONSE REGULATOR 10); transcription factor/ two-component response regulator | chr4:15444296-15446772 REVERSE	8392.76	8516.4	1.01473
Brapa_ESTC013503	AT3G15210	Symbols: ATERF-4, ERF4, RAP2.5, ATERF4 | ATERF-4/ATERF4/ERF4/RAP2.5 (ETHYLENE RESPONSIVE ELEMENT BINDING FACTOR 4); DNA binding / protein binding / transcription factor/ transcriptional repressor | chr3:5121479-5122147 FORWARD	8282.63	9287.93	1.12137
Brapa_ESTC015273	AT3G54390	| Symbols: | transcription factor | chr3:20148890-20149841 REVERSE	8254.84	7038.41	0.85264
Brapa_ESTC034987	AT5G60120	Symbols: TOE2 | TOE2 (TARGET OF EAT1 2); DNA binding / transcription factor | chr5:24225379-24228293 FORWARD	8242.17	8537.9	1.03588
Brapa_ESTC002810	AT1G08465	Symbols: YAB2 | YAB2 (YABBY 2); transcription factor | chr1:2676030-2679385 FORWARD	8028.3	8441.97	1.05153
Brapa_ESTC030877	AT4G02590	Symbols: UNE12 | UNE12 (unfertilized embryo sac 12); DNA binding | chr4:1137968-1140306 REVERSE	7887.39	7983.53	1.01219
Brapa_ESTC007776	AT3G15030	Symbols: MEE35, TCP4 | TCP4 (TCP family transcription factor 4, maternal effect embryo arrest 35); transcription factor | chr3:5062315-5063577 FORWARD	7802.53	6938	0.889199
Brapa_ESTC014268	AT1G19000	Symbols: | myb family transcription factor | chr1:6561326-6562675 REVERSE	7769.1	8631.07	1.11095
Brapa_ESTC014905	AT5G10510	Symbols: AIL6 | AIL6 (AINTEGUMENTA-LIKE 6); DNA binding / transcription factor | chr5:3316037-3320009 FORWARD	7677.49	8770.31	1.14234
Brapa_ESTC005943	AT4G16420	Symbols: PRZ1, ADA2B | ADA2B (PROPORZ1); DNA binding / transcription factor | chr4:9262828-9265798 REVERSE	7628.68	6954.73	0.911656
Brapa_ESTC011381	AT3G25890	Symbols: | AP2 domain-containing transcription factor, putative | chr3:9477289-9478287 FORWARD	7454.96	6531.26	0.876096
Brapa_ESTC029339	AT2G35530	Symbols: | bZIP transcription factor family protein | chr2:14930359-14933104 REVERSE	7388.63	8181.28	1.10728
Brapa_ESTC034183	AT1G34190	Symbols: ANAC017 | ANAC017 (Arabidopsis NAC domain containing protein 17); transcription factor | chr1:12451707-12453892 FORWARD	7281.1	7300.6	1.00268
Brapa_ESTC023270	AT4G35040	Symbols: | bZIP transcription factor family protein | chr4:16680826-16681810 FORWARD	7130.12	6380.72	0.894897
Brapa_ESTC037082	AT2G16770	Symbols: | DNA binding / transcription factor | chr2:7286941-7287899 FORWARD	6951.45	7630.56	1.09769
Brapa_ESTC033326	AT5G62020	Symbols: HSFB2A, AT-HSFB2A | AT-HSFB2A (Arabidopsis thaliana heat shock transcription factor B2A); DNA binding / transcription factor | chr5:24933438-24934420 FORWARD	6883.3	6570.21	0.954515
Brapa_ESTC018072	AT3G60320	| Symbols: | DNA binding | chr3:22303048-22306203 REVERSE	6874.32	6390.94	0.929683
Brapa_ESTC032913	AT3G24120	Symbols: | myb family transcription factor | chr3:8705932-8708155 REVERSE	6769.48	7031.55	1.03871
Brapa_ESTC038866	AT3G63030	Symbols: MBD4 | MBD4 (methyl-CpG-binding domain 4); DNA binding | chr3:23306369-23307400 FORWARD	6642.62	6049.43	0.910699
Brapa_ESTC020232	AT4G35040	Symbols: | bZIP transcription factor family protein | chr4:16680826-16681810 FORWARD	6518.2	6730.69	1.0326
Brapa_ESTC041759	AT2G36270	Symbols: GIA1, ABI5 | ABI5 (ABA INSENSITIVE 5); DNA binding / transcription factor/ transcriptional activator | chr2:15212059-15213650 REVERSE	6457.4	6131.11	0.94947
Brapa_ESTC004948	AT4G02590	Symbols: UNE12 | UNE12 (unfertilized embryo sac 12); DNA binding | chr4:1137968-1140306 REVERSE	6455.94	6617.71	1.02506
Brapa_ESTC007530	AT5G11060	Symbols: KNAT4 | KNAT4 (KNOTTED1-LIKE HOMEOBOX GENE 4); transcription factor | chr5:3510409-3512968 FORWARD	6078.87	5300.99	0.872035
Brapa_ESTC039920	AT1G21970	Symbols: EMB 212, EMB212, LEC1 | LEC1 (LEAFY COTYLEDON 1); transcription factor | chr1:7727739-7729560 REVERSE	5884.1	5711.9	0.970735
Brapa_ESTC042329	AT2G04880	Symbols: ATWRKY1, WRKY1, ZAP1 | ZAP1 (WRKY FAMILY TRANSCRIPTION FACTOR 1); transcription factor/ transcriptional activator | chr2:1718554-1720216 FORWARD	5861.25	5434.61	0.92721
Brapa_ESTC032055	AT1G15360	Symbols: SHN1, WIN1 | SHN1/WIN1 (SHINE1); DNA binding / transcription factor | chr1:5283604-5284501 FORWARD	5728.53	5378.9	0.938967
Brapa_ESTC011745	AT5G47220	Symbols: ATERF2, ATERF-2, ERF2 | ATERF-2/ATERF2/ERF2 (ETHYLENE RESPONSE FACTOR 2); DNA binding / transcription factor/ transcriptional activator | chr5:19189250-19189981 REVERSE	5679.47	5250.18	0.924414
Brapa_ESTC022124	AT1G18400	Symbols: BEE1 | BEE1 (BR ENHANCED EXPRESSION 1); transcription factor | chr1:6331457-6333569 FORWARD	5655.11	6181.97	1.09317
Brapa_ESTC000418	AT5G47370	Symbols: HAT2 | HAT2; transcription factor | chr5:19233709-19234874 REVERSE	5527.1	4962.88	0.897918
Brapa_ESTC027139	AT3G25940	Symbols: | transcription factor S-II (TFIIS) domain-containing protein | chr3:9496341-9497179 FORWARD	5488.84	5944.08	1.08294
Brapa_ESTC021680	AT5G02030	Symbols: HB-6, PNY, BLR, RPL, BLH9, VAN, LSN | LSN (LARSON, VAAMANA); DNA binding / transcription factor | chr5:395751-398869 FORWARD	5436.51	5232.55	0.962483
Brapa_ESTC021241	AT1G28310	| Symbols: | DNA binding | chr1:9912521-9913672 REVERSE	5309.88	4557.14	0.858238
Brapa_ESTC031015	AT1G21450	Symbols: SCL1 | SCL1 (SCARECROW-LIKE 1); transcription factor | chr1:7509710-7511491 FORWARD	5248.51	4526.41	0.862418
Brapa_ESTC020465	AT4G34990	Symbols: AtMYB32 | AtMYB32 (myb domain protein 32); DNA binding / transcription factor | chr4:16661375-16662294 REVERSE	5174.31	4690.36	0.906471
Brapa_ESTC019880	AT3G13445	Symbols: TFIID-1, TBP1 | TBP1 (transcription factor IID-1); DNA binding / RNA polymerase II transcription factor | chr3:4380324-4381876 FORWARD	5146.43	5750.88	1.11745
Brapa_ESTC043015	AT3G13810	Symbols: ATIDD11 | ATIDD11 (ARABIDOPSIS THALIANA INDETERMINATE(ID)-DOMAIN 11); nucleic acid binding / transcription factor/ zinc ion binding | chr3:4544948-4547307 FORWARD	5134.38	5546.17	1.0802
Brapa_ESTC025741	AT3G04670	Symbols: ATWRKY39, WRKY39 | WRKY39 (WRKY DNA-binding protein 39); transcription factor | chr3:1266536-1267697 REVERSE	5122.4	5369.54	1.04825
Brapa_ESTC018655	AT3G13810	Symbols: ATIDD11 | ATIDD11 (ARABIDOPSIS THALIANA INDETERMINATE(ID)-DOMAIN 11); nucleic acid binding / transcription factor/ zinc ion binding | chr3:4544948-4547307 FORWARD	5081.71	5268.52	1.03676
Brapa_ESTC011117	AT2G24790	Symbols: COL3 | COL3 (CONSTANS-LIKE 3); protein binding / transcription factor/ zinc ion binding | chr2:10574038-10575025 FORWARD	5022.62	5452.54	1.0856
Brapa_ESTC019752	AT3G44350	Symbols: ANAC061 | ANAC061 (Arabidopsis NAC domain containing protein 61); transcription factor | chr3:16033823-16035474 REVERSE	4882.2	5514.18	1.12945
Brapa_ESTC043597	AT3G53340	Symbols: | CCAAT-box binding transcription factor, putative | chr3:19785360-19786969 REVERSE	4739.85	4992.39	1.05328
Brapa_ESTC010132	AT4G17460	Symbols: HAT1 | HAT1 (homeobox-leucine zipper protein 1); DNA binding / transcription factor | chr4:9739874-9740995 FORWARD	4734.61	4934.05	1.04212
Brapa_ESTC014037	AT2G24790	Symbols: COL3 | COL3 (CONSTANS-LIKE 3); protein binding / transcription factor/ zinc ion binding | chr2:10574038-10575025 FORWARD	4637.21	4733.52	1.02077
Brapa_ESTC003817	AT5G25220	Symbols: KNAT3 | KNAT3 (KNOTTED1-LIKE HOMEOBOX GENE 3); transcription factor | chr5:8736211-8738118 FORWARD	4563.03	5175.12	1.13414
Brapa_ESTC021623	AT3G02150	Symbols: TCP13, TFPD, PTF1 | PTF1 (PLASTID transcription factor 1); transcription factor | chr3:391529-392596 FORWARD	4482.86	4688.17	1.0458
Brapa_ESTC009669	AT5G13180	Symbols: ANAC083 | ANAC083 (Arabidopsis NAC domain containing protein 83); transcription factor | chr5:4196646-4197580 FORWARD	4433.67	4300.8	0.970032
Brapa_ESTC012631	AT3G15540	Symbols: MSG2, IAA19 | IAA19 (indoleacetic acid-induced protein 19); transcription factor | chr3:5264107-5265385 FORWARD	4365.49	4654.99	1.06632
Brapa_ESTC018257	AT3G25890	Symbols: | AP2 domain-containing transcription factor, putative | chr3:9477289-9478287 FORWARD	4327.31	4164.25	0.962318
Brapa_ESTC031194	AT4G20400	Symbols: | transcription factor jumonji (jmj) family protein / zinc finger (C5HC2 type) family protein | chr4:11009764-11013599 FORWARD	4324.93	3918.09	0.905931
Brapa_ESTC024675	AT3G56980	Symbols: ORG3 | ORG3 (OBP3-responsive gene 3); DNA binding / transcription factor | chr3:21097591-21098473 REVERSE	4298.33	4749.51	1.10497
Brapa_ESTC044623	AT4G29230	Symbols: ANAC075 | ANAC075 (Arabidopsis NAC domain containing protein 75); transcription factor | chr4:14410344-14414962 FORWARD	4265.64	3944.49	0.924712
Brapa_ESTC030525	AT1G66350	Symbols: RGL, RGL1 | RGL1 (RGA-LIKE 1); transcription factor | chr1:24751990-24753525 FORWARD	4182.01	4015.58	0.960203
Brapa_ESTC048721	AT4G36740	Symbols: ATHB40 | ATHB40 (ARABIDOPSIS THALIANA HOMEOBOX PROTEIN 40); DNA binding / transcription factor | chr4:17314653-17316318 REVERSE	4176.84	4402.78	1.05409
Brapa_ESTC044184	AT4G18880	Symbols: HSFA4A, AT-HSFA4A | AT-HSFA4A (Arabidopsis thaliana heat shock transcription factor A4A); DNA binding / transcription factor | chr4:10347780-10349062 REVERSE	4159.83	3980.35	0.956854
Brapa_ESTC039680	AT1G19220	Symbols: IAA22, ARF11, ARF19 | ARF19 (AUXIN RESPONSE FACTOR 11); transcription factor | chr1:6628386-6632770 REVERSE	4084.79	3496.61	0.856007
Brapa_ESTC013539	AT2G23790	Symbols: | similar to transcription factor [Arabidopsis thaliana] (TAIR:AT4G36820.1); similar to Os10g0501500 [Oryza sativa (japonica cultivar-group)] (GB:NP_001064986.1); similar to Protein of unknown function DUF607 [Medicago truncatula] (GB:ABE78504.1); similar to Os03g0233000 [Oryza sativa (japonica cultivar-group)] (GB:NP_001049472.1); contains InterPro domain Protein of unknown function DUF…	4042.19	4038.09	0.998986
Brapa_ESTC026165	AT1G79350	Symbols: EMB1135 | EMB1135 (EMBRYO DEFECTIVE 1135); DNA binding | chr1:29849722-29858108 REVERSE	4019.69	4001.99	0.995597
Brapa_ESTC023197	AT4G02590	Symbols: UNE12 | UNE12 (unfertilized embryo sac 12); DNA binding | chr4:1137968-1140306 REVERSE	4011.21	3513.48	0.875915
Brapa_ESTC011775	AT3G05545	Symbols: | transcription factor, putative / zinc finger (C3HC4 type RING finger) family protein | chr3:1609442-1612139 FORWARD	3990.49	3697.28	0.926523
Brapa_ESTC021842	AT3G24520	Symbols: HSFC1, AT-HSFC1 | AT-HSFC1 (Arabidopsis thaliana heat shock transcription factor C1); DNA binding / transcription factor | chr3:8941462-8942538 FORWARD	3960.71	4347.84	1.09774
Brapa_ESTC012416	AT1G09060	| Symbols: | transcription factor | chr1:2921238-2925257 REVERSE	3949.14	3644.5	0.922859
Brapa_ESTC002264	AT1G27730	Symbols: ZAT10, STZ | STZ (SALT TOLERANCE ZINC FINGER); nucleic acid binding / transcription factor/ zinc ion binding | chr1:9648289-9648972 REVERSE	3934.22	4091.9	1.04008
Brapa_ESTC023491	AT2G45680	Symbols: | TCP family transcription factor, putative | chr2:18827791-18828861 REVERSE	3905.17	3342.71	0.85597
Brapa_ESTC005968	AT3G11100	| Symbols: | transcription factor | chr3:3476496-3477326 REVERSE	3850.64	4024.32	1.0451
Brapa_ESTC022374	AT1G08465	Symbols: YAB2 | YAB2 (YABBY 2); transcription factor | chr1:2676030-2679385 FORWARD	3771.21	3872.1	1.02675
Brapa_ESTC038765	AT4G17695	Symbols: KAN3 | KAN3 (KANADI 3); DNA binding / transcription factor | chr4:9848147-9850711 REVERSE	3726.02	3201.87	0.859327
Brapa_ESTC027689	AT5G07580	Symbols: | DNA binding / transcription factor | chr5:2399526-2400350 FORWARD	3718.12	3480.72	0.936151
Brapa_ESTC049715	AT5G62470	Symbols: mybcov1, AtMYB96, MYB96 | MYB96 (myb domain protein 96); DNA binding / transcription factor | chr5:25096660-25098084 REVERSE	3716.37	3512.8	0.945223
Brapa_ESTC040718	AT1G79350	Symbols: EMB1135 | EMB1135 (EMBRYO DEFECTIVE 1135); DNA binding | chr1:29849722-29858108 REVERSE	3691.38	3382.38	0.916291
Brapa_ESTC010214	AT2G27470	Symbols: | CCAAT-box binding transcription factor subunit HAP3-related | chr2:11752274-11753453 REVERSE	3470.29	3641.64	1.04938
Brapa_ESTC034001	AT1G01150	Symbols: | DNA binding / zinc ion binding | chr1:70115-71998 REVERSE	3470.09	3815.23	1.09946
Brapa_ESTC011812	AT5G47220	Symbols: ATERF2, ATERF-2, ERF2 | ATERF-2/ATERF2/ERF2 (ETHYLENE RESPONSE FACTOR 2); DNA binding / transcription factor/ transcriptional activator | chr5:19189250-19189981 REVERSE	3457.92	3452.24	0.998357
Brapa_ESTC023613	AT4G38910	Symbols: BPC5, BBR/BPC5, ATBPC5 | ATBPC5/BBR/BPC5/BPC5 (BASIC PENTACYSTEINE 5); DNA binding / transcription factor | chr4:18144519-18146465 REVERSE	3419.14	3862.5	1.12967
Brapa_ESTC037301	AT2G03070	Symbols: | similar to NPH4 (NON-PHOTOTROPHIC HYPOCOTYL), transcription factor [Arabidopsis thaliana] (TAIR:AT5G20730.3); similar to hypothetical protein Os03g31010 [Oryza sativa (japonica cultivar-group)] (GB:AAP20836.1) | chr2:905977-908791 FORWARD	3365.57	3074.99	0.913661
Brapa_ESTC022533	AT5G60850	Symbols: OBP4 | OBP4 (OBF BINDING PROTEIN 4); DNA binding / transcription factor | chr5:24497804-24498727 FORWARD	3362.73	3468.08	1.03133
Brapa_ESTC026705	AT3G53710	| Symbols: AGD6 | AGD6; DNA binding | chr3:19914708-19916397 REVERSE	3282.5	3213.52	0.978986
Brapa_ESTC023609	AT1G15480	| Symbols: | DNA binding | chr1:5318302-5320417 FORWARD	3266.13	3352.08	1.02632
Brapa_ESTC036130	AT3G56850	Symbols: DPBF3, AREB3 | AREB3 (ABA-RESPONSIVE ELEMENT BINDING PROTEIN 3); DNA binding / transcription factor/ transcriptional activator | chr3:21057533-21058873 REVERSE	3252.01	3371.96	1.03688
Brapa_ESTC021343	AT1G68670	Symbols: | myb family transcription factor | chr1:25786007-25787536 FORWARD	3219.72	2963.62	0.920459
Brapa_ESTC011308	AT1G43860	| Symbols: | transcription factor | chr1:16624684-16626825 REVERSE	3173.03	3086.47	0.97272
Brapa_ESTC021296	AT3G20910	Symbols: | CCAAT-binding transcription factor (CBF-B/NF-YA) family protein | chr3:7326501-7328375 FORWARD	3118	2699.85	0.865892
Brapa_ESTC019041	AT3G61830	Symbols: ARF18 | ARF18 (AUXIN RESPONSE FACTOR 18); transcription factor | chr3:22899146-22902154 FORWARD	3074.34	2735.71	0.889853
Brapa_ESTC045211	AT4G02590	Symbols: UNE12 | UNE12 (unfertilized embryo sac 12); DNA binding | chr4:1137968-1140306 REVERSE	3068.54	2699.82	0.879839
Brapa_ESTC002189	AT1G52150	Symbols: ATHB15, CNA, ICU4, ATHB-15 | ATHB-15 (INCURVATA 4); DNA binding / transcription factor | chr1:19413582-19417630 REVERSE	3016.44	3019.01	1.00085
Brapa_ESTC047290	AT3G28917	Symbols: MIF2 | MIF2 (MINI ZINC FINGER 2); DNA binding | chr3:10926251-10926553 FORWARD	3006.41	2800.35	0.93146
Brapa_ESTC020170	AT1G58100	Symbols: | TCP family transcription factor, putative | chr1:21516345-21517550 REVERSE	2985.95	2694.23	0.902302
Brapa_ESTC003355	AT1G32640	Symbols: RD22BP1, JAI1, JIN1, MYC2, ZBF1, ATMYC2 | ATMYC2 (JASMONATE INSENSITIVE 1); DNA binding / transcription factor | chr1:11799022-11800893 REVERSE	2955.97	2692.58	0.910896
Brapa_ESTC025017	AT4G04450	Symbols: ATWRKY42, WRKY42 | WRKY42 (WRKY DNA-binding protein 42); transcription factor | chr4:2218377-2221111 FORWARD	2917.43	2551.79	0.874671
Brapa_ESTC000281	AT4G11660	Symbols: HSFB2B, AT-HSFB2B | AT-HSFB2B (Arabidopsis thaliana heat shock transcription factor B2B); transcription factor | chr4:7043000-7044221 FORWARD	2860.86	2522.46	0.881714
Brapa_ESTC011807	AT4G17500	Symbols: ATERF-1 | ATERF-1 (ETHYLENE RESPONSIVE ELEMENT BINDING FACTOR 1); DNA binding / transcription factor/ transcriptional activator | chr4:9759658-9760224 FORWARD	2858.07	2675.4	0.936086
Brapa_ESTC005947	AT1G50600	Symbols: SCL5 | SCL5; transcription factor | chr1:18741066-18743215 REVERSE	2832.66	2585.04	0.912584
Brapa_ESTC023180	AT3G05545	Symbols: | transcription factor, putative / zinc finger (C3HC4 type RING finger) family protein | chr3:1609442-1612139 FORWARD	2823.87	3029.29	1.07274
Brapa_ESTC019462	AT1G28370	Symbols: ERF11, ATERF11 | ATERF11/ERF11 (ERF domain protein 11); DNA binding / transcription factor/ transcriptional repressor | chr1:9956337-9956837 REVERSE	2809.34	2978.86	1.06034
Brapa_ESTC021078	AT2G04880	Symbols: ATWRKY1, WRKY1, ZAP1 | ZAP1 (WRKY FAMILY transcription factor 1); transcription factor/ transcriptional activator | chr2:1718554-1720216 FORWARD	2636.69	2488.16	0.943668
Brapa_ESTC020714	AT3G26744	Symbols: ICE1 | ICE1 (INDUCER OF CBF EXPRESSION 1); DNA binding | chr3:9834190-9836027 REVERSE	2630.36	2973.13	1.13031
Brapa_ESTC026756	AT4G02590	Symbols: UNE12 | UNE12 (unfertilized embryo sac 12); DNA binding | chr4:1137968-1140306 REVERSE	2628.21	2820.01	1.07298
Brapa_ESTC024846	AT4G36710	Symbols: | scarecrow transcription factor family protein | chr4:17306064-17307524 FORWARD	2617.72	2549.36	0.973886
Brapa_ESTC026812	AT4G02590	Symbols: UNE12 | UNE12 (unfertilized embryo sac 12); DNA binding | chr4:1137968-1140306 REVERSE	2614.79	2976.5	1.13833
Brapa_ESTC005584	AT3G05545	Symbols: | transcription factor, putative / zinc finger (C3HC4 type RING finger) family protein | chr3:1609442-1612139 FORWARD	2604.41	2578.57	0.990078
Brapa_ESTC031479	AT1G27000	Symbols: | bZIP family transcription factor | chr1:9374055-9376409 FORWARD	2580.47	2520.23	0.976655
Brapa_ESTC019889	AT5G23260	Symbols: ABS, TT16 | TT16 (TRANSPARENT TESTA16); transcription factor | chr5:7836445-7838343 FORWARD	2549.51	2408.86	0.944833
Brapa_ESTC032312	AT4G01250	Symbols: ATWRKY22, WRKY22 | WRKY22 (WRKY DNA-binding protein 22); transcription factor | chr4:522839-524129 REVERSE	2545.61	2238.08	0.879192
Brapa_ESTC031232	AT4G04890	Symbols: PDF2 | PDF2 (PROTODERMAL FACTOR2); DNA binding / transcription factor | chr4:2476968-2480088 REVERSE	2544.1	2482.7	0.975866
Brapa_ESTC040921	AT1G52890	Symbols: ANAC019 | ANAC019 (Arabidopsis NAC domain containing protein 19); transcription factor | chr1:19700960-19702112 REVERSE	2539.38	2498.41	0.983866
Brapa_ESTC023871	AT5G51230	Symbols: VEF2, CYR1, EMF2 | EMF2 (EMBRYONIC FLOWER 2); transcription factor | chr5:20841379-20846570 FORWARD	2454.12	2682.58	1.09309
Brapa_ESTC013049	AT1G08465	Symbols: YAB2 | YAB2 (YABBY 2); transcription factor | chr1:2676030-2679385 FORWARD	2427.96	2753.63	1.13413
Brapa_ESTC013135	AT5G65070	Symbols: FCL4, MAF4 | MAF4 (MADS AFFECTING FLOWERING 4); transcription factor | chr5:26009536-26013156 FORWARD	2420.24	2670.51	1.10341
Brapa_ESTC029932	AT3G20310	Symbols: ATERF-7, ATERF7, ERF7 | ERF7 (ETHYLINE RESPONSE FACTOR7); DNA binding / protein binding / transcription factor/ transcriptional repressor | chr3:7085963-7086697 REVERSE	2408.09	2368.85	0.983705
Brapa_ESTC025153	AT4G17460	Symbols: HAT1 | HAT1 (homeobox-leucine zipper protein 1); DNA binding / transcription factor | chr4:9739874-9740995 FORWARD	2407.35	2553.43	1.06068
Brapa_ESTC032739	AT1G19220	Symbols: IAA22, ARF11, ARF19 | ARF19 (AUXIN RESPONSE FACTOR 11); transcription factor | chr1:6628386-6632770 REVERSE	2395.1	2638.87	1.10178
Brapa_ESTC049095	AT3G15210	Symbols: ATERF-4, ERF4, RAP2.5, ATERF4 | ATERF-4/ATERF4/ERF4/RAP2.5 (ETHYLENE RESPONSIVE ELEMENT BINDING FACTOR 4); DNA binding / protein binding / transcription factor/ transcriptional repressor | chr3:5121479-5122147 FORWARD	2388	2321.66	0.972219
Brapa_ESTC012387	AT1G67030	Symbols: ZFP6 | ZFP6 (ZINC FINGER PROTEIN 6); nucleic acid binding / transcription factor/ zinc ion binding | chr1:25020307-25020900 FORWARD	2385.88	2418.24	1.01356
Brapa_ESTC018374	AT4G16420	Symbols: PRZ1, ADA2B | ADA2B (PROPORZ1); DNA binding / transcription factor | chr4:9262828-9265798 REVERSE	2365.87	2118.23	0.895328
Brapa_ESTC045396	AT5G06800	Symbols: | myb family transcription factor | chr5:2103375-2105681 FORWARD	2330.6	2201.64	0.944667
Brapa_ESTC013970	AT5G17300	Symbols: | myb family transcription factor | chr5:5690437-5692437 REVERSE	2304.37	2225.63	0.96583
Brapa_ESTC004450	AT1G07520	Symbols: | scarecrow transcription factor family protein | chr1:2309715-2311802 REVERSE	2252.16	2155.9	0.957259
Brapa_ESTC012235	AT1G52150	Symbols: ATHB15, CNA, ICU4, ATHB-15 | ATHB-15 (INCURVATA 4); DNA binding / transcription factor | chr1:19413582-19417630 REVERSE	2203.28	2448.56	1.11132
Brapa_ESTC023843	AT2G37650	Symbols: | scarecrow-like transcription factor 9 (SCL9) | chr2:15799701-15801857 FORWARD	2197.39	2487.36	1.13196
Brapa_ESTC027102	AT1G27000	Symbols: | bZIP family transcription factor | chr1:9374055-9376409 FORWARD	2186.47	2305.03	1.05422
Brapa_ESTC037538	AT5G27610	Symbols: | DNA binding / transcription factor | chr5:9764855-9769709 FORWARD	2154.35	2362.24	1.0965
Brapa_ESTC010656	AT3G56850	Symbols: DPBF3, AREB3 | AREB3 (ABA-RESPONSIVE ELEMENT BINDING PROTEIN 3); DNA binding / transcription factor/ transcriptional activator | chr3:21057533-21058873 REVERSE	2133.69	2112.56	0.990097
Brapa_ESTC031589	AT1G63490	Symbols: | transcription factor jumonji (jmjC) domain-containing protein | chr1:23548603-23555611 REVERSE	2082.48	2110	1.01322
Brapa_ESTC045770	AT5G17300	Symbols: | myb family transcription factor | chr5:5690437-5692437 REVERSE	2081.21	2360.03	1.13397
Brapa_ESTC027932	AT5G61590	Symbols: | AP2 domain-containing transcription factor family protein | chr5:24781879-24782484 REVERSE	2071.41	2072.64	1.00059
Brapa_ESTC031257	AT4G39780	Symbols: | AP2 domain-containing transcription factor, putative | chr4:18458210-18459028 REVERSE	1966.47	1870.79	0.951344
Brapa_ESTC022185	AT2G47520	Symbols: | AP2 domain-containing transcription factor, putative | chr2:19509961-19510560 REVERSE	1948.5	1947.24	0.999353
Brapa_ESTC027929	AT5G52660	Symbols: | myb family transcription factor | chr5:21376649-21379263 REVERSE	1932.49	1783.52	0.922913
Brapa_ESTC047926	AT3G11100	| Symbols: | transcription factor | chr3:3476496-3477326 REVERSE	1928.78	1837.72	0.952789
Brapa_ESTC003176	AT3G23050	Symbols: AXR2, IAA7 | IAA7 (AUXIN RESISTANT 2); transcription factor | chr3:8194775-8196723 FORWARD	1907.19	1846	0.967916
Brapa_ESTC046397	AT5G58340	| Symbols: | DNA binding | chr5:23599833-23601471 FORWARD	1895.44	1832.83	0.966968
Brapa_ESTC007575	AT3G20770	Symbols: EIN3 | EIN3 (ETHYLENE-INSENSITIVE3); transcription factor | chr3:7260708-7262594 REVERSE	1867.65	1656.68	0.88704
Brapa_ESTC022590	AT3G17100	| Symbols: | transcription factor | chr3:5831558-5832250 FORWARD	1826.35	1981.69	1.08505
Brapa_ESTC007565	AT5G64340	Symbols: SAC51 | SAC51 (SUPPRESSOR OF ACAULIS 51); transcription factor/ transcription regulator | chr5:25748116-25749162 REVERSE	1821.38	1602.85	0.88002
Brapa_ESTC014873	AT4G34590	Symbols: ATBZIP11, ATB2, BZIP11, GBF6 | GBF6 (G-box binding factor 6); DNA binding / transcription factor | chr4:16522454-16522933 FORWARD	1803.83	1630.37	0.903838
Brapa_ESTC022738	AT3G50410	Symbols: OBP1 | OBP1 (OBF BINDING PROTEIN 1); DNA binding / transcription factor | chr3:18720853-18721614 FORWARD	1788.87	2024.12	1.13151
Brapa_ESTC024905	AT2G43140	Symbols: | DNA binding / transcription factor | chr2:17939453-17942716 REVERSE	1770.3	1523.82	0.860769
Brapa_ESTC026639	AT3G22880	Symbols: DMC1, ATDMC1 | ATDMC1 (RECA-LIKE GENE); ATP binding / DNA-dependent ATPase/ damaged DNA binding | chr3:8097955-8100747 REVERSE	1751.4	1549.01	0.884441
Brapa_ESTC013193	AT3G12250	Symbols: BZIP45, TGA6 | TGA6 (TGA1a-related gene 6); DNA binding / transcription factor | chr3:3906358-3908590 FORWARD	1749.34	1877.57	1.0733
Brapa_ESTC015329	AT5G63790	Symbols: ANAC102 | ANAC102 (Arabidopsis NAC domain containing protein 102); transcription factor | chr5:25544113-25545239 REVERSE	1744.06	1914.6	1.09778
Brapa_ESTC012280	AT5G67580	Symbols: TRB2, ATTRB2 | ATTRB2/TRB2 (TELOMERE REPEAT BINDING FACTOR 2); DNA binding / transcription factor | chr5:26973069-26974299 REVERSE	1742.53	1554.64	0.892174
Brapa_ESTC011747	AT1G68670	Symbols: | myb family transcription factor | chr1:25786007-25787536 FORWARD	1730.67	1863.74	1.07689
Brapa_ESTC027724	AT1G28360	Symbols: ERF12, ATERF12 | ATERF12/ERF12 (ERF domain protein 12); DNA binding / transcription factor/ transcriptional repressor | chr1:9951921-9952490 FORWARD	1727.31	1897.58	1.09858
Brapa_ESTC017798	AT4G39780	Symbols: | AP2 domain-containing transcription factor, putative | chr4:18458210-18459028 REVERSE	1712.97	1898.8	1.10848
Brapa_ESTC033662	AT1G71130	Symbols: | AP2 domain-containing transcription factor, putative | chr1:26826539-26827024 FORWARD	1705.93	1701.23	0.997245
Brapa_ESTC010399	AT5G06250	| Symbols: | transcription factor | chr5:1892715-1894059 REVERSE	1703.13	1760.24	1.03353
Brapa_ESTC015893	AT1G19850	Symbols: ARF5, IAA24, MP | MP (MONOPTEROS); transcription factor | chr1:6887344-6891173 FORWARD	1676.91	1871.31	1.11593
Brapa_ESTC021901	AT4G28610	Symbols: ATPHR1, PHR1 | PHR1 (PHOSPHATE STARVATION RESPONSE 1); transcription factor | chr4:14133170-14134957 REVERSE	1644.09	1464.66	0.890864
Brapa_ESTC000695	AT5G47370	Symbols: HAT2 | HAT2; transcription factor | chr5:19233709-19234874 REVERSE	1642.88	1636.6	0.996177
Brapa_ESTC040588	AT1G76890	Symbols: AT-GT2, GT2 | GT2 (GT2); transcription factor | chr1:28878105-28880097 REVERSE	1642.62	1738.52	1.05838
Brapa_ESTC020480	AT1G57820	Symbols: VIM1 | VIM1 (VARIANT IN METHYLATION 1); DNA binding | chr1:21418007-21421567 REVERSE	1609.48	1644.92	1.02202
Brapa_ESTC016129	AT5G07690	Symbols: AtMYB29, MYB29 | MYB29 (myb domain protein 29); DNA binding / transcription factor | chr5:2447091-2448286 FORWARD	1598.77	1681.28	1.05161
Brapa_ESTC000907	AT3G52090	Symbols: ATRPB13.6 | ATRPB13.6 (Arabidopsis thaliana RNA polymerase II 13.6 kDa subunit); DNA binding / DNA-directed RNA polymerase | chr3:19329047-19329976 REVERSE	1574.67	1414.57	0.898328
Brapa_ESTC021630	AT5G51910	Symbols: | TCP family transcription factor, putative | chr5:21111930-21112811 REVERSE	1565.24	1718.05	1.09763
Brapa_ESTC021131	AT3G50410	Symbols: OBP1 | OBP1 (OBF BINDING PROTEIN 1); DNA binding / transcription factor | chr3:18720853-18721614 FORWARD	1564.35	1330.09	0.850251
Brapa_ESTC008317	AT1G01250	Symbols: | AP2 domain-containing transcription factor, putative | chr1:104731-105309 REVERSE	1555.38	1630.06	1.04801
Brapa_ESTC027266	AT1G02340	Symbols: RSF1, FBI1, REP1, HFR1 | HFR1 (LONG HYPOCOTYL IN FAR-RED); DNA binding / transcription factor | chr1:465933-467685 REVERSE	1554.61	1636.2	1.05248
Brapa_ESTC022893	AT4G24470	Symbols: ZIM | ZIM (ZINC-FINGER PROTEIN EXPRESSED IN INFLORESCENCE MERISTEM); transcription factor | chr4:12645795-12647744 FORWARD	1542.33	1528.53	0.991052
Brapa_ESTC023302	AT1G53230	Symbols: TCP3 | TCP3 (TCP family transcription factor 3); transcription factor | chr1:19853928-19855103 REVERSE	1499.37	1417.38	0.945317
Brapa_ESTC010422	AT1G07370	Symbols: PCNA1 | PCNA1 (PROLIFERATING CELLULAR NUCLEAR ANTIGEN); DNA binding / DNA polymerase processivity factor | chr1:2263202-2264380 FORWARD	1492.39	1387.19	0.929509
Brapa_ESTC038073	AT4G17460	Symbols: HAT1 | HAT1 (homeobox-leucine zipper protein 1); DNA binding / transcription factor | chr4:9739874-9740995 FORWARD	1488.4	1411.64	0.948428
Brapa_ESTC031283	AT5G47220	Symbols: ATERF2, ATERF-2, ERF2 | ATERF-2/ATERF2/ERF2 (ETHYLENE RESPONSE FACTOR 2); DNA binding / transcription factor/ transcriptional activator | chr5:19189250-19189981 REVERSE	1466.06	1657.98	1.13091
Brapa_ESTC011277	AT3G58630	| Symbols: | transcription factor | chr3:21694905-21696748 REVERSE	1456.89	1487.61	1.02109
Brapa_ESTC044087	AT4G16750	Symbols: | DRE-binding transcription factor, putative | chr4:9421143-9421682 REVERSE	1433.05	1294.29	0.903172
Brapa_ESTC024213	AT4G37730	Symbols: ATBZIP7 | bZIP transcription factor family protein | chr4:17723794-17724711 FORWARD	1416.4	1243.47	0.877909
Brapa_ESTC017076	AT1G61215	Symbols: BRD4 | BRD4 (BROMODOMAIN 4); DNA binding | chr1:22576838-22579039 FORWARD	1398.09	1474.75	1.05483
Brapa_ESTC027988	AT5G41410	Symbols: BEL1 | BEL1 (BELL 1); DNA binding / transcription factor | chr5:16597652-16600998 FORWARD	1396.39	1302.32	0.932633
Brapa_ESTC021801	AT4G32880	Symbols: ATHB8, ATHB-8 | ATHB-8 (HOMEOBOX GENE 8); DNA binding / transcription factor | chr4:15863591-15867826 REVERSE	1374.34	1219.75	0.887517
Brapa_ESTC034445	AT1G63100	Symbols: | scarecrow transcription factor family protein | chr1:23403056-23405032 REVERSE	1372.42	1291.64	0.94114
Brapa_ESTC040927	AT1G52830	Symbols: SHY1, IAA6 | IAA6 (indoleacetic acid-induced protein 6); transcription factor | chr1:19676338-19677227 REVERSE	1367.71	1554.42	1.13651
Brapa_ESTC023421	AT2G34710	Symbols: ATHB14, ATHB-14, PHB-1D, PHB | PHB (PHABULOSA); DNA binding / transcription factor | chr2:14646627-14651072 REVERSE	1354.08	1254.09	0.926157
Brapa_ESTC031084	AT3G02150	Symbols: TCP13, TFPD, PTF1 | PTF1 (PLASTID transcription factor 1); transcription factor | chr3:391529-392596 FORWARD	1352.75	1429.18	1.0565
Brapa_ESTC044928	AT4G32730	Symbols: PC-MYB1, ATMYB3R1, MYB3R-1, ATMYB3R-1 | PC-MYB1 (myb domain protein 3R1); DNA binding / transcription factor | chr4:15791044-15795648 FORWARD	1345.02	1236.29	0.919161
Brapa_ESTC006976	AT2G47210	Symbols: | myb family transcription factor | chr2:19386109-19389274 FORWARD	1337.92	1268.37	0.948016
Brapa_ESTC025517	AT5G29000	Symbols: | myb family transcription factor | chr5:11022340-11024104 REVERSE	1332.83	1175.21	0.88174
Brapa_ESTC018981	AT1G22640	Symbols: AtMYB3, MYB3 | MYB3 (myb domain protein 3); DNA binding / transcription factor | chr1:8006278-8007208 FORWARD	1316.1	1267.35	0.962959
Brapa_ESTC026714	AT4G32880	Symbols: ATHB8, ATHB-8 | ATHB-8 (HOMEOBOX GENE 8); DNA binding / transcription factor | chr4:15863591-15867826 REVERSE	1308.25	1194.98	0.913419
Brapa_ESTC009044	AT1G71130	Symbols: | AP2 domain-containing transcription factor, putative | chr1:26826539-26827024 FORWARD	1305.79	1434.36	1.09846
Brapa_ESTC026960	AT1G76890	Symbols: AT-GT2, GT2 | GT2 (GT2); transcription factor | chr1:28878105-28880097 REVERSE	1293.76	1446.94	1.1184
Brapa_ESTC029994	AT5G25160	Symbols: ZFP3 | ZFP3 (ZINC FINGER PROTEIN 3); nucleic acid binding / transcription factor/ zinc ion binding | chr5:8687527-8688234 FORWARD	1287.35	1116.14	0.867006
Brapa_ESTC019053	AT1G28370	Symbols: ERF11, ATERF11 | ATERF11/ERF11 (ERF domain protein 11); DNA binding / transcription factor/ transcriptional repressor | chr1:9956337-9956837 REVERSE	1282.01	1213.32	0.94642
Brapa_ESTC004610	AT2G20570	Symbols: GLK1, GPRI1 | GPRI1 (GOLDEN2-LIKE 1); transcription factor | chr2:8862567-8864603 FORWARD	1253.58	1104.7	0.881236
Brapa_ESTC010421	AT2G20825	Symbols: ULT2 | ULT2 (ULTRAPETALA 2); DNA binding | chr2:8972926-8973876 REVERSE	1225.92	1083.21	0.883589
Brapa_ESTC009966	AT5G42780	Symbols: ATHB27 | ATHB27 (ARABIDOPSIS THALIANA HOMEOBOX PROTEIN 27); DNA binding / transcription factor | chr5:17172069-17172797 FORWARD	1214.77	1386.28	1.14119
Brapa_ESTC044977	AT4G34590	Symbols: ATBZIP11, ATB2, BZIP11, GBF6 | GBF6 (G-box binding factor 6); DNA binding / transcription factor | chr4:16522454-16522933 FORWARD	1201.61	1302.13	1.08365
Brapa_ESTC016178	AT2G37550	Symbols: AGD7, ASP1 | ASP1 (PDE1 SUPPRESSOR 1); DNA binding | chr2:15762622-15764534 REVERSE	1199.05	1076.61	0.897886
Brapa_ESTC023854	AT3G01460	Symbols: MBD9 | MBD9 (METHYL-CPG-BINDING DOMAIN 9); DNA binding | chr3:173323-182045 FORWARD	1180.22	1084.12	0.918575
Brapa_ESTC021586	AT3G52170	| Symbols: | DNA binding | chr3:19358017-19360077 REVERSE	1178.22	1198.5	1.01721
Brapa_ESTC006705	AT3G17100	| Symbols: | transcription factor | chr3:5831558-5832250 FORWARD	1174.41	1255.3	1.06888
Brapa_ESTC026367	AT4G18880	Symbols: HSFA4A, AT-HSFA4A | AT-HSFA4A (Arabidopsis thaliana heat shock transcription factor A4A); DNA binding / transcription factor | chr4:10347780-10349062 REVERSE	1144.25	1049.1	0.916845
Brapa_ESTC035554	AT4G04635	Symbols: | DNA binding / transposase | chr4:2347901-2349154 FORWARD	1087.06	1048.4	0.964436
Brapa_ESTC039575	AT1G13300	Symbols: | myb family transcription factor | chr1:4556974-4558588 FORWARD	1081.2	1215.53	1.12424
Brapa_ESTC011969	AT3G20910	Symbols: | CCAAT-binding transcription factor (CBF-B/NF-YA) family protein | chr3:7326501-7328375 FORWARD	1080.1	989.715	0.916318
Brapa_ESTC033450	AT1G71520	Symbols: | AP2 domain-containing transcription factor, putative | chr1:26942274-26942705 FORWARD	1067.58	1131.81	1.06016
Brapa_ESTC041086	AT2G20570	Symbols: GLK1, GPRI1 | GPRI1 (GOLDEN2-LIKE 1); transcription factor | chr2:8862567-8864603 FORWARD	1059.27	1079.49	1.01909
Brapa_ESTC023120	AT3G26744	Symbols: ICE1 | ICE1 (INDUCER OF CBF EXPRESSION 1); DNA binding | chr3:9834190-9836027 REVERSE	1055.71	912.547	0.864392
Brapa_ESTC032232	AT5G60690	Symbols: IFL, IFL1, REV | REV (REVOLUTA); DNA binding / lipid binding / transcription factor | chr5:24414960-24419159 FORWARD	1045.81	1042.32	0.996663
Brapa_ESTC048839	AT1G51745	Symbols: | similar to ATP binding / DNA binding [Arabidopsis thaliana] (TAIR:AT3G21295.1); similar to Os04g0599100 [Oryza sativa (japonica cultivar-group)] (GB:NP_001053748.1); similar to Os01g0558500 [Oryza sativa (japonica cultivar-group)] (GB:NP_001043335.1); similar to serine-rich repeat protein [Streptococcus agalactiae] (GB:AAZ95526.1); contains InterPro domain PWWP; (InterPro:IPR000313) | …	1035.07	915.576	0.884555
Brapa_ESTC042261	AT2G03060	Symbols: | similar to AGL102, DNA binding / transcription factor [Arabidopsis thaliana] (TAIR:AT1G18750.1); similar to SRF-type transcription factor family protein [Oryza sativa (japonica cultivar-group)] (GB:ABA95182.1); contains InterPro domain transcription factor, MADS-box; (InterPro:IPR002100) | chr2:901613-903568 FORWARD	1016.23	938.619	0.923629
Brapa_ESTC039185	AT5G27610	Symbols: | DNA binding / transcription factor | chr5:9764855-9769709 FORWARD	1007.58	874.848	0.868267
Brapa_ESTC032256	AT3G22880	Symbols: DMC1, ATDMC1 | ATDMC1 (RECA-LIKE GENE); ATP binding / DNA-dependent ATPase/ damaged DNA binding | chr3:8097955-8100747 REVERSE	1001.45	933.88	0.932528
Brapa_ESTC004003	AT2G33810	Symbols: SPL3 | SPL3 (SQUAMOSA PROMOTER BINDING PROTEIN-LIKE 3); transcription factor | chr2:14312418-14312904 FORWARD	998.582	1060.11	1.06162
Brapa_ESTC024650	AT5G01900	Symbols: ATWRKY62, WRKY62 | WRKY62 (WRKY DNA-binding protein 62); transcription factor | chr5:351133-352010 REVERSE	988.42	1090.06	1.10283
Brapa_ESTC038363	AT4G02020	Symbols: SWN, SWINGER, EZA1 | EZA1 (SWINGER); transcription factor | chr4:886693-891743 FORWARD	978.85	1016.59	1.03856
Brapa_ESTC038351	AT4G13980	Symbols: HSFA5, AT-HSFA5 | AT-HSFA5 (Arabidopsis thaliana heat shock transcription factor A5); DNA binding / transcription factor | chr4:8077514-8079242 REVERSE	951.738	1066.55	1.12063
Brapa_ESTC042838	AT3G13000	| Symbols: | transcription factor | chr3:4158221-4160825 REVERSE	942.613	1003.64	1.06474
Brapa_ESTC033242	AT1G26960	Symbols: ATHB23 | ATHB23 (ARABIDOPSIS THALIANA HOMEOBOX PROTEIN 23); DNA binding / transcription factor | chr1:9356113-9357226 FORWARD	939.449	1016.13	1.08162
Brapa_ESTC033197	AT5G61420	Symbols: AtMYB28, MYB28 | MYB28 (myb domain protein 28); DNA binding / transcription factor | chr5:24706701-24708021 REVERSE	938.962	1017.18	1.0833
Brapa_ESTC019693	AT5G62260	| Symbols: | DNA binding | chr5:25026557-25028574 FORWARD	904.62	1037.52	1.14691
		>20,000
		14,000-19,999
		8,000-13,999
		4,000-7,999
		2,000-3,999
		1,000-1,999
		500-999
		<500

## Sheet: No
SEQ_ID	TAIR7_cds ID	Description, blastN	Leaf_white	Leaf_yellow
Brapa_ESTC020174	AT3G56400	Symbols: ATWRKY70, WRKY70 | WRKY70 (WRKY DNA-binding protein 70); transcription factor | chr3:20920061-20921388 REVERSE	6.7651	9.1811
Brapa_ESTC008108	AT3G28917	Symbols: MIF2 | MIF2 (MINI ZINC FINGER 2); DNA binding | chr3:10926251-10926553 FORWARD	7.0463	9.9269
Brapa_ESTC051674	AT5G53290	Symbols: CRF3 | CRF3 (CYTOKININ RESPONSE FACTOR 3); DNA binding / transcription factor | chr5:21635187-21636251 REVERSE	10.2431	10.264
Brapa_ESTC006087	AT5G60970	Symbols: TCP5 | TCP family transcription factor, putative | chr5:24552796-24553878 REVERSE	8.5381	10.5362
Brapa_ESTC018076	AT1G15360	Symbols: SHN1, WIN1 | SHN1/WIN1 (SHINE1); DNA binding / transcription factor | chr1:5283604-5284501 FORWARD	10.2611	11.4586
Brapa_ESTC025908	AT5G15800	Symbols: AGL2, SEP1 | SEP1 (SEPALLATA1); DNA binding / transcription factor | chr5:5151597-5153770 REVERSE	10.6711	12.1268
Brapa_ESTC020336	AT1G23380	Symbols: KNAT6L, KNAT6S, KNAT6 | KNAT6 (Knotted-like Arabidopsis thaliana 6); DNA binding / transcription factor | chr1:8297488-8302481 REVERSE	10.3872	12.8593
Brapa_ESTC024064	AT2G25820	| Symbols: | transcription factor | chr2:11022064-11022741 FORWARD	7.9115	13.4796
Brapa_ESTC001010	AT1G19000	Symbols: | myb family transcription factor | chr1:6561326-6562675 REVERSE	11.3367	14.5542
Brapa_ESTC018040	AT1G15360	Symbols: SHN1, WIN1 | SHN1/WIN1 (SHINE1); DNA binding / transcription factor | chr1:5283604-5284501 FORWARD	14.7594	16.3549
Brapa_ESTC001854	AT1G13960	Symbols: WRKY4 | WRKY4 (WRKY DNA-binding protein 4); transcription factor | chr1:4776619-4779040 FORWARD	11.1083	17.0269
Brapa_ESTC001299	AT1G10480	Symbols: ZFP5 | ZFP5 (ZINC FINGER PROTEIN 5); nucleic acid binding / transcription factor/ zinc ion binding | chr1:3449735-3450370 FORWARD	10.8997	17.151
Brapa_ESTC004950	AT5G13080	Symbols: ATWRKY75, WRKY75 | WRKY75 (WRKY DNA-binding protein 75); transcription factor | chr5:4149931-4151022 REVERSE	17.8542	17.5932
Brapa_ESTC019595	AT2G28550	Symbols: RAP2.7, TOE1 | TOE1 (TARGET OF EAT1 1); DNA binding / transcription factor | chr2:12233521-12235328 REVERSE	13.9255	17.6753
Brapa_ESTC002442	AT1G53490	| Symbols: | DNA binding | chr1:19968814-19970479 FORWARD	35.8814	18.1173
Brapa_ESTC051717	AT4G36990	Symbols: HSFB1, AT-HSFB1, ATHSF4, HSF4 | HSF4 (HEAT SHOCK FACTOR 4); DNA binding / transcription factor | chr4:17440654-17441700 FORWARD	220.987	18.1451
Brapa_ESTC040469	AT1G26870	Symbols: ANAC009 | ANAC009 (Arabidopsis NAC domain containing protein 9); transcription factor | chr1:9312843-9314970 FORWARD	13.0244	18.7278
Brapa_ESTC003150	AT1G68320	Symbols: AtMYB62, BW62B, BW62C, MYB62 | MYB62 (myb domain protein 62); DNA binding / transcription factor | chr1:25607505-25608547 FORWARD	18.5686	19.6818
Brapa_ESTC045640	AT5G14340	Symbols: AtMYB40 | AtMYB40 (myb domain protein 40); DNA binding / transcription factor | chr5:4623370-4624782 FORWARD	19.5221	21.0714
Brapa_ESTC051784	AT2G43140	Symbols: | DNA binding / transcription factor | chr2:17939453-17942716 REVERSE	16.6197	22.2459
Brapa_ESTC029664	AT5G07690	Symbols: AtMYB29, MYB29 | MYB29 (myb domain protein 29); DNA binding / transcription factor | chr5:2447091-2448286 FORWARD	22.9233	22.6759
Brapa_ESTC049661	AT5G64530	Symbols: ANAC104, XND1 | ANAC104/XND1 (Arabidopsis NAC domain containing protein 104); transcription factor | chr5:25812586-25813925 FORWARD	14.4662	24.0092
Brapa_ESTC047269	AT3G49850	Symbols: TRB3, ATTRB3 | ATTRB3/TRB3 (TELOMERE REPEAT BINDING FACTOR 1); DNA binding / transcription factor | chr3:18500436-18501716 FORWARD	25.6215	26.0219
Brapa_ESTC017257	AT5G65670	Symbols: IAA9 | IAA9 (indoleacetic acid-induced protein 9); transcription factor | chr5:26271689-26273360 FORWARD	12.7398	26.1775
Brapa_ESTC027307	AT3G28917	Symbols: MIF2 | MIF2 (MINI ZINC FINGER 2); DNA binding | chr3:10926251-10926553 FORWARD	37.1858	26.6088
Brapa_ESTC003247	AT3G19580	Symbols: AZF2 | AZF2 (ARABIDOPSIS ZINC-FINGER PROTEIN 2); nucleic acid binding / transcription factor/ zinc ion binding | chr3:6803299-6804120 REVERSE	96.1928	29.3799
Brapa_ESTC049460	AT2G02820	Symbols: AtMYB88, MYB88 | MYB88 (myb domain protein 88); DNA binding / transcription factor | chr2:804715-807138 REVERSE	53.4838	30.1457
Brapa_ESTC004961	AT5G60890	Symbols: AtMYB34, ATR1, ATR | ATR1 (ALTERED TRYPTOPHAN REGULATION); DNA binding / kinase/ transcription factor | chr5:24512255-24513446 FORWARD	29.7279	31.0776
Brapa_ESTC021837	AT4G00050	Symbols: UNE10 | UNE10 (unfertilized embryo sac 10); DNA binding / transcription factor | chr4:17863-19848 FORWARD	28.883	31.686
Brapa_ESTC005886	AT3G02310	Symbols: AGL4, SEP2 | SEP2 (SEPALLATA2); DNA binding / transcription factor | chr3:464561-466694 REVERSE	14.16	31.7702
Brapa_ESTC017680	AT3G28917	Symbols: MIF2 | MIF2 (MINI ZINC FINGER 2); DNA binding | chr3:10926251-10926553 FORWARD	22.1895	32.0357
Brapa_ESTC050862	AT2G42780	Symbols: | similar to Os08g0169600 [Oryza sativa (japonica cultivar-group)] (GB:NP_001061087.1); similar to predicted protein [Coprinopsis cinerea okayama7#130] (GB:EAU88783.1); contains InterPro domain RNA polymerase II transcription factor SIII subunit A; (InterPro:IPR010684) | chr2:17808114-17809723 FORWARD	42.5142	32.8774
Brapa_ESTC004326	AT2G23380	Symbols: ICU1, CLF | CLF (CURLY LEAF); transcription factor | chr2:9962650-9967197 FORWARD	55.5969	33.3927
Brapa_ESTC028795	AT5G62165	Symbols: AGL42 | AGL42 (AGAMOUS LIKE 42); transcription factor | chr5:24982301-24985663 FORWARD	26.1146	34.5181
Brapa_ESTC024463	AT3G06490	Symbols: AtMYB108, BOS1, MYB108 | MYB108 (BOTRYTIS-SUSCEPTIBLE1, myb domain protein 108); DNA binding / transcription factor | chr3:2004304-2006364 FORWARD	51.9509	35.2978
Brapa_ESTC001963	AT3G24500	Symbols: MBF1C, ATMBF1C | ATMBF1C/MBF1C (MULTIPROTEIN BRIDGING FACTOR 1C); DNA binding / transcription coactivator/ transcription factor | chr3:8918762-8919208 FORWARD	42.0678	35.4878
Brapa_ESTC001245	AT5G47640	Symbols: | CCAAT-box binding transcription factor subunit B (NF-YB) (HAP3 ) (AHAP3) family (Hap3b) | chr5:19326640-19327212 FORWARD	24.7044	36.0222
Brapa_ESTC027067	AT5G10140	Symbols: FLF, AGL25, FLC | FLC (FLOWERING LOCUS C); transcription factor | chr5:3173725-3179340 REVERSE	38.0674	37.9035
Brapa_ESTC048722	AT4G36740	Symbols: ATHB40 | ATHB40 (ARABIDOPSIS THALIANA HOMEOBOX PROTEIN 40); DNA binding / transcription factor | chr4:17314653-17316318 REVERSE	25.5216	38.3538
Brapa_ESTC024658	AT3G23250	Symbols: MYB15, AtY19, AtMYB15 | AtMYB15/AtY19/MYB15 (myb domain protein 15); DNA binding / transcription factor | chr3:8309499-8310631 FORWARD	49.0273	38.7068
Brapa_ESTC024340	AT5G57390	Symbols: AIL5 | AIL5 (AINTEGUMENTA-LIKE 5); DNA binding / transcription factor | chr5:23270685-23273663 REVERSE	40.572	39.972
Brapa_ESTC027680	AT1G30810	Symbols: | transcription factor jumonji (jmj) family protein / zinc finger (C5HC2 type) family protein | chr1:10938121-10941486 REVERSE	33.1972	40.4623
Brapa_ESTC004487	AT4G37730	Symbols: ATBZIP7 | bZIP transcription factor family protein | chr4:17723794-17724711 FORWARD	142.752	40.572
Brapa_ESTC006145	AT5G59820	Symbols: ZAT12, RHL41 | RHL41 (RESPONSIVE TO HIGH LIGHT 41); nucleic acid binding / transcription factor/ zinc ion binding | chr5:24120299-24120787 FORWARD	52.5964	42.518
Brapa_ESTC035039	AT3G19210	Symbols: ATRAD54, CHR25 | ATRAD54/CHR25 (ARABIDOPSIS HOMOLOG OF RAD54); ATP binding / DNA binding / helicase | chr3:6652805-6658882 REVERSE	42.642	43.9007
Brapa_ESTC032315	AT5G65210	Symbols: | DNA binding / calmodulin binding / transcription factor | chr5:26076257-26077975 FORWARD	70.3045	43.95
Brapa_ESTC000813	AT3G15510	Symbols: ANAC056, ATNAC2 | ATNAC2 (Arabidopsis thaliana NAC domain containing protein 2); transcription factor | chr3:5243703-5245044 FORWARD	297.586	44.0116
Brapa_ESTC013611	AT1G28470	Symbols: ANAC010 | ANAC010 (Arabidopsis NAC domain containing protein 10); transcription factor | chr1:10010245-10011853 FORWARD	43.7166	44.344
Brapa_ESTC050861	AT2G42780	Symbols: | similar to Os08g0169600 [Oryza sativa (japonica cultivar-group)] (GB:NP_001061087.1); similar to predicted protein [Coprinopsis cinerea okayama7#130] (GB:EAU88783.1); contains InterPro domain RNA polymerase II transcription factor SIII subunit A; (InterPro:IPR010684) | chr2:17808114-17809723 FORWARD	39.8976	46.4264
Brapa_ESTC033043	AT3G50410	Symbols: OBP1 | OBP1 (OBF BINDING PROTEIN 1); DNA binding / transcription factor | chr3:18720853-18721614 FORWARD	42.3957	47.314
Brapa_ESTC015405	AT4G31550	Symbols: ATWRKY11, WRKY11 | WRKY11 (WRKY DNA-binding protein 11); transcription factor | chr4:15290071-15291464 REVERSE	374.893	48.5319
Brapa_ESTC022892	AT2G17770	Symbols: ATBZIP27, FDP | ATBZIP27/FDP (FD PARALOG); transcription factor | chr2:7730185-7730655 FORWARD	35.7506	48.8824
Brapa_ESTC024804	AT5G64750	Symbols: ABR1 | ABR1 (ABA REPRESSOR1); DNA binding / transcription factor | chr5:25908905-25910882 FORWARD	99.2661	49.3315
Brapa_ESTC045884	AT5G39610	Symbols: ANAC092, ATNAC6, ATNAC2 | ANAC092/ATNAC2/ATNAC6 (Arabidopsis NAC domain containing protein 92); protein heterodimerization/ protein homodimerization/ transcription factor | chr5:15875819-15876878 REVERSE	73.4927	49.5333
Brapa_ESTC006310	AT1G79020	Symbols: | transcription factor-related | chr1:29732175-29734952 REVERSE	87.8045	49.6291
Brapa_ESTC002948	AT2G38470	Symbols: ATWRKY33, WRKY33 | WRKY33 (WRKY DNA-binding protein 33); transcription factor | chr2:16115554-16117617 FORWARD	166.049	50.4145
Brapa_ESTC046158	AT5G46590	Symbols: ANAC096 | ANAC096 (Arabidopsis NAC domain containing protein 96); transcription factor | chr5:18922906-18924038 FORWARD	34.2524	50.6398
Brapa_ESTC044348	AT4G22680	Symbols: AtMYB85, MYB85 | MYB85 (myb domain protein 85); DNA binding / transcription factor | chr4:11922800-11924091 REVERSE	80.458	51.4662
Brapa_ESTC038624	AT2G36890	Symbols: RAX2, MYB38, ATMYB38 | ATMYB38/MYB38/RAX2 (myb domain protein 38); DNA binding / transcription factor | chr2:15492900-15494324 FORWARD	34.9309	51.4685
Brapa_ESTC041597	AT2G31180	Symbols: AtMYB14, Myb14at | AtMYB14/Myb14at (myb domain protein 14); DNA binding / transcription factor | chr2:13293883-13295252 REVERSE	29.9128	53.4896
Brapa_ESTC040360	AT1G68150	Symbols: ATWRKY9, WRKY9 | WRKY9 (WRKY DNA-binding protein 9); transcription factor | chr1:25547633-25549278 FORWARD	35.0686	53.8114
Brapa_ESTC004751	AT1G80840	Symbols: ATWRKY40, WRKY40 | WRKY40 (WRKY DNA-binding protein 40); transcription factor | chr1:30388726-30390248 FORWARD	218.621	53.9932
Brapa_ESTC021998	AT3G27260	Symbols: GTE8 | GTE8 (GLOBAL transcription factor GROUP E8); DNA binding | chr3:10069648-10073640 FORWARD	133.035	54.1104
Brapa_ESTC031325	AT1G63910	Symbols: AtMYB103, MYB103, ATMYB103 | ATMYB103 (myb domain protein 103); DNA binding / transcription factor | chr1:23723631-23725288 REVERSE	38.5211	54.6746
Brapa_ESTC004414	AT3G48770	Symbols: | ATP binding / DNA binding | chr3:18090246-18097802 REVERSE	96.9427	55.5955
Brapa_ESTC017124	AT4G08150	Symbols: BP, BP1, KNAT1 | KNAT1 (BREVIPEDICELLUS 1); transcription factor | chr4:5147966-5150607 REVERSE	51.6364	55.6198
Brapa_ESTC025356	AT4G00050	Symbols: UNE10 | UNE10 (unfertilized embryo sac 10); DNA binding / transcription factor | chr4:17863-19848 FORWARD	67.1897	55.7195
Brapa_ESTC010543	AT1G69120	Symbols: AP1 | AP1 (APETALA1); DNA binding / transcription factor | chr1:25986239-25989765 REVERSE	50.0043	57.5628
Brapa_ESTC039464	AT1G10120	Symbols: | DNA binding / transcription factor | chr1:3304230-3305986 REVERSE	42.9183	57.7312
Brapa_ESTC003825	AT1G24260	Symbols: AGL9, SEP3 | SEP3 (SEPALLATA3); transcription factor | chr1:8593779-8595851 REVERSE	101.4	58.0027
Brapa_ESTC008553	AT3G12560	Symbols: ATTBP2, TRFL9 | TRFL9 (TRF-LIKE 9); DNA binding | chr3:3982279-3984855 REVERSE	62.9606	58.1172
Brapa_ESTC037998	AT1G74650	Symbols: AtY13, AtMYB31 | AtMYB31/AtY13 (myb domain protein 31); DNA binding / transcription factor | chr1:28045154-28046434 FORWARD	32.6707	58.6433
Brapa_ESTC003135	AT3G23250	Symbols: MYB15, AtY19, AtMYB15 | AtMYB15/AtY19/MYB15 (myb domain protein 15); DNA binding / transcription factor | chr3:8309499-8310631 FORWARD	17.22	59.0828
Brapa_ESTC038500	AT4G17380	Symbols: MSH4 | MSH4 (MUTS-LIKE PROTEIN 4); ATP binding / damaged DNA binding | chr4:9708754-9714080 FORWARD	30.4826	59.6018
Brapa_ESTC030404	AT5G11510	Symbols: AtMYB3R4, MYB3R-4 | MYB3R-4 (C-MYB-LIKE transcription factor 3R-4, myb domain protein 3R-4); DNA binding / transcription factor | chr5:3680453-3683634 FORWARD	53.4896	60.6775
Brapa_ESTC003276	AT4G23550	Symbols: WRKY29 | WRKY29 (WRKY DNA-binding protein 29); transcription factor | chr4:12291841-12293098 FORWARD	44.7641	60.6804
Brapa_ESTC033627	AT1G74080	Symbols: ATMYB122, MYB122 | MYB122 (myb domain protein 122); DNA binding / transcription factor | chr1:27859633-27861093 FORWARD	58.3778	61.2187
Brapa_ESTC025182	AT3G15500	Symbols: ANAC055, ATNAC3 | ATNAC3 (ARABIDOPSIS NAC DOMAIN CONTAINING PROTEIN 55); transcription factor | chr3:5234738-5235889 FORWARD	357.14	62.2398
Brapa_ESTC049046	AT3G02310	Symbols: AGL4, SEP2 | SEP2 (SEPALLATA2); DNA binding / transcription factor | chr3:464561-466694 REVERSE	42.6126	62.8305
Brapa_ESTC004653	AT4G30180	Symbols: | transcription factor/ transcription regulator | chr4:14769034-14769510 FORWARD	16.9825	62.8389
Brapa_ESTC027310	AT2G30250	Symbols: ATWRKY25, WRKY25 | WRKY25 (WRKY DNA-binding protein 25); transcription factor | chr2:12910630-12912166 REVERSE	344.803	62.8521
Brapa_ESTC020348	AT1G61110	Symbols: ANAC025 | ANAC025 (Arabidopsis NAC domain containing protein 25); transcription factor | chr1:22520395-22521720 FORWARD	59.0729	62.9663
Brapa_ESTC043350	AT3G27920	Symbols: ATMYB0, AtGL1, GL1 | GL1 (GLABRA 1); transcription factor | chr3:10363182-10364743 REVERSE	31.0665	63.111
Brapa_ESTC046573	AT5G62380	Symbols: ANAC101, VND6 | VND6 (VASCULAR-RELATED NAC-DOMAIN 6); transcription factor | chr5:25067910-25069084 FORWARD	76.173	64.6587
Brapa_ESTC000960	AT1G76900	Symbols: AtTLP1 | AtTLP1 (TUBBY LIKE PROTEIN 1); phosphoric diester hydrolase/ transcription factor | chr1:28887635-28889271 FORWARD	259.505	66.5424
Brapa_ESTC044856	AT4G33450	Symbols: AtMYB69 | AtMYB69 (myb domain protein 69); DNA binding / transcription factor | chr4:16095749-16096606 REVERSE	76.7875	66.6895
Brapa_ESTC000946	AT1G80740	Symbols: CMT1 | CMT1 (CHROMOMETHYLASE 1); DNA binding | chr1:30347286-30351723 FORWARD	50.375	67.4681
Brapa_ESTC037230	AT3G61910	Symbols: ANAC066, NST2 | NST2 (NAC SECONDARY WALL THICKENING PROMOTING FACTOR2); transcription factor | chr3:22940168-22941382 REVERSE	65.7599	68.3314
Brapa_ESTC026391	AT5G46910	Symbols: | transcription factor jumonji (jmj) family protein | chr5:19065007-19068107 FORWARD	29.2772	69.5758
Brapa_ESTC036391	AT2G01500	Symbols: WOX6, PFS2, HOS9 | HOS9/PFS2 (HIGH EXPRESSION OF OSMOTICALLY RESPONSIVE GENE 9); transcription factor | chr2:224469-225996 REVERSE	45.3091	69.6154
Brapa_ESTC026659	AT1G26840	Symbols: ORC6, ATORC6 | ATORC6/ORC6 (Origin recognition complex protein 6); DNA binding | chr1:9298809-9300590 FORWARD	79.0543	71.6967
Brapa_ESTC004272	AT1G27050	Symbols: ATHB54 | ATHB54 (ARABIDOPSIS THALIANA HOMEOBOX PROTEIN 54); nucleic acid binding / transcription factor | chr1:9391880-9394395 FORWARD	162.317	71.9267
Brapa_ESTC043986	AT3G61630	Symbols: CRF6 | CRF6 (CYTOKININ RESPONSE FACTOR 6); DNA binding / transcription factor | chr3:22816249-22817196 FORWARD	351.174	72.3175
Brapa_ESTC028843	AT5G62320	Symbols: AtMYBCU15, AtMYB99, MYB99 | MYB99 (myb domain protein 99); DNA binding / transcription factor | chr5:25046111-25047012 REVERSE	70.8768	72.7589
Brapa_ESTC046479	AT5G57420	Symbols: IAA33 | IAA33 (indoleacetic acid-induced protein 33); transcription factor | chr5:23287250-23288185 FORWARD	59.0824	73.7045
Brapa_ESTC026773	AT5G60890	Symbols: AtMYB34, ATR1, ATR | ATR1 (ALTERED TRYPTOPHAN REGULATION); DNA binding / kinase/ transcription factor | chr5:24512255-24513446 FORWARD	96.9032	74.574
Brapa_ESTC038499	AT4G17380	Symbols: MSH4 | MSH4 (MUTS-LIKE PROTEIN 4); ATP binding / damaged DNA binding | chr4:9708754-9714080 FORWARD	40.2524	74.9178
Brapa_ESTC021085	AT3G50890	Symbols: ATHB28 | ATHB28 (ARABIDOPSIS THALIANA HOMEOBOX PROTEIN 28); DNA binding / transcription factor | chr3:18927401-18928150 FORWARD	75.2862	75.543
Brapa_ESTC005764	AT1G51190	Symbols: PLT2 | PLT2 (PLETHORA 2); transcription factor | chr1:18981185-18983973 FORWARD	18.4764	76.5109
Brapa_ESTC045665	AT5G14750	Symbols: WER, AtMYB66, WER1 | WER (WEREWOLF 1); DNA binding / transcription factor | chr5:4763659-4764741 REVERSE	61.1419	76.7378
Brapa_ESTC005766	AT4G00200	| Symbols: | DNA binding | chr4:82653-84104 REVERSE	260.698	78.3117
Brapa_ESTC046255	AT5G55020	Symbols: ATMYB120, MYB120 | MYB120 (myb domain protein 120); DNA binding / transcription factor | chr5:22341825-22343474 REVERSE	80.6958	79.3666
Brapa_ESTC003989	AT1G76890	Symbols: AT-GT2, GT2 | GT2 (GT2); transcription factor | chr1:28878105-28880097 REVERSE	79.1504	80.625
Brapa_ESTC029846	AT5G07210	Symbols: ARR21 | ARR21 (ARABIDOPSIS RESPONSE REGULATOR 21); transcription factor/ two-component response regulator | chr5:2252238-2256019 FORWARD	64.8137	80.8525
Brapa_ESTC049206	AT4G29940	Symbols: PRHA | PRHA (PATHOGENESIS RELATED HOMEODOMAIN PROTEIN A); transcription factor | chr4:14648352-14652716 REVERSE	86.3481	82.4363
Brapa_ESTC000118	AT5G07690	Symbols: AtMYB29, MYB29 | MYB29 (myb domain protein 29); DNA binding / transcription factor | chr5:2447091-2448286 FORWARD	98.2295	83.2898
Brapa_ESTC051783	AT2G43140	Symbols: | DNA binding / transcription factor | chr2:17939453-17942716 REVERSE	33.7976	83.39
Brapa_ESTC012382	AT5G65210	Symbols: | DNA binding / calmodulin binding / transcription factor | chr5:26076257-26077975 FORWARD	97.8685	83.447
Brapa_ESTC050093	AT1G60850	Symbols: AAC42, ATRPAC42 | ATRPAC42 (Arabidopsis thaliana RNA polymerase I subunit 42); DNA binding / DNA-directed RNA polymerase | chr1:22401743-22403820 REVERSE	97.8376	84.7844
Brapa_ESTC025877	AT2G46680	Symbols: ATHB7, ATHB-7 | ATHB-7 (ARABIDOPSIS THALIANA HOMEOBOX 7); transcription factor | chr2:19172847-19173843 REVERSE	72.5995	85.6478
Brapa_ESTC049404	AT1G27000	Symbols: | bZIP family transcription factor | chr1:9374055-9376409 FORWARD	118.192	87.0475
Brapa_ESTC038652	AT3G27920	Symbols: ATMYB0, AtGL1, GL1 | GL1 (GLABRA 1); transcription factor | chr3:10363182-10364743 REVERSE	62.5341	87.6011
Brapa_ESTC023862	AT1G47720	Symbols: OSB1 | OSB1 (ORGANELLAR SINGLE-STRANDED); single-stranded DNA binding | chr1:17563954-17565299 REVERSE	79.8342	89.0099
Brapa_ESTC033962	AT5G42910	Symbols: | basic leucine zipper transcription factor (BZIP15) | chr5:17221136-17222439 FORWARD	116.992	89.9889
Brapa_ESTC027911	AT3G20810	Symbols: | transcription factor jumonji (jmjC) domain-containing protein | chr3:7275820-7278150 FORWARD	159.569	90.5723
Brapa_ESTC045078	AT4G36650	Symbols: | transcription factor IIB (TFIIB) family protein | chr4:17283288-17285532 REVERSE	158.996	91.0445
Brapa_ESTC016533	AT5G10140	Symbols: FLF, AGL25, FLC | FLC (FLOWERING LOCUS C); transcription factor | chr5:3173725-3179340 REVERSE	81.5865	91.1969
Brapa_ESTC048046	AT2G01500	Symbols: WOX6, PFS2, HOS9 | HOS9/PFS2 (HIGH EXPRESSION OF OSMOTICALLY RESPONSIVE GENE 9); transcription factor | chr2:224469-225996 REVERSE	116.959	91.4182
Brapa_ESTC037265	AT4G27950	Symbols: CRF4 | CRF4 (CYTOKININ RESPONSE FACTOR 4); DNA binding / transcription factor | chr4:13909738-13910745 REVERSE	139.603	91.5078
Brapa_ESTC010419	AT3G20740	Symbols: FIS3, FIE1, FIE | FIE (FERTILIZATION-INDEPENDENT ENDOSPERM 1); nucleotide binding / transcription factor | chr3:7249070-7252260 REVERSE	55.9878	93.2879
Brapa_ESTC016835	AT1G26960	Symbols: ATHB23 | ATHB23 (ARABIDOPSIS THALIANA HOMEOBOX PROTEIN 23); DNA binding / transcription factor | chr1:9356113-9357226 FORWARD	35.5756	95.8193
Brapa_ESTC008259	AT1G15360	Symbols: SHN1, WIN1 | SHN1/WIN1 (SHINE1); DNA binding / transcription factor | chr1:5283604-5284501 FORWARD	93.6947	96.6689
Brapa_ESTC018897	AT4G21440	Symbols: ATMYB102, ATM4 | ATM4/ATMYB102 (ARABIDOPSIS MYB-LIKE 102); DNA binding / transcription factor | chr4:11418436-11419663 REVERSE	85.729	97.9085
Brapa_ESTC026808	AT3G20310	Symbols: ATERF-7, ATERF7, ERF7 | ERF7 (ETHYLINE RESPONSE FACTOR7); DNA binding / protein binding / transcription factor/ transcriptional repressor | chr3:7085963-7086697 REVERSE	107.054	102.049
Brapa_ESTC051903	AT3G28920	Symbols: ATHB34 | ATHB34 (ARABIDOPSIS THALIANA HOMEOBOX PROTEIN 34); DNA binding / transcription factor | chr3:10941835-10942773 REVERSE	103.638	102.695
Brapa_ESTC015197	AT4G34410	Symbols: | AP2 domain-containing transcription factor, putative | chr4:16451996-16452802 FORWARD	82.0828	103.918
Brapa_ESTC022826	AT5G41030	Symbols: | TCP family transcription factor, putative | chr5:16445934-16446665 FORWARD	192.185	104.332
Brapa_ESTC031143	AT3G15270	Symbols: SPL5 | SPL5 (SQUAMOSA PROMOTER BINDING PROTEIN-LIKE 5); DNA binding / transcription factor | chr3:5140631-5141263 REVERSE	123.669	105.583
Brapa_ESTC031601	AT3G61250	Symbols: AtMYB17 | AtMYB17 (myb domain protein 17); DNA binding / transcription factor | chr3:22682281-22683526 FORWARD	101.814	105.874
Brapa_ESTC017380	AT2G42110	Symbols: | similar to Os03g0128300 [Oryza sativa (japonica cultivar-group)] (GB:NP_001048839.1); contains domain SOX9B (PTHR10270:SF18); contains domain SOX transcription factorS (PTHR10270) | chr2:17569312-17569810 REVERSE	94.0844	105.933
Brapa_ESTC046600	AT5G65070	Symbols: FCL4, MAF4 | MAF4 (MADS AFFECTING FLOWERING 4); transcription factor | chr5:26009536-26013156 FORWARD	95.2192	106.058
Brapa_ESTC015939	AT5G60850	Symbols: OBP4 | OBP4 (OBF BINDING PROTEIN 4); DNA binding / transcription factor | chr5:24497804-24498727 FORWARD	217.913	106.396
Brapa_ESTC031502	AT5G48890	| Symbols: | transcription factor | chr5:19837579-19838100 FORWARD	80.5963	106.417
Brapa_ESTC022458	AT3G57390	Symbols: AGL18 | AGL18 (AGAMOUS-LIKE 18); transcription factor | chr3:21244887-21246712 FORWARD	64.4301	110.036
Brapa_ESTC038774	AT4G17785	Symbols: | myb family transcription factor (MYB39) | chr4:9881880-9883381 REVERSE	104.297	110.93
Brapa_ESTC015687	AT1G80390	Symbols: IAA15 | IAA15 (indoleacetic acid-induced protein 15); transcription factor | chr1:30226672-30227594 REVERSE	126.498	111.074
Brapa_ESTC006279	AT3G21430	| Symbols: | DNA binding | chr3:7544806-7552847 REVERSE	187.449	111.507
[truncated: 407 more rows]
